# Supplementary material
Source: Research Square preprint supplement (doi:10.21203/rs.3.rs-6711579/v1)
Supplement: Supplementary file 1 [file aadb073d6bf06ba931d90c17.docx]

***Supplementary Material***

**1 Supplementary Methods**

**1.1 siRNA and shRNA transfection**

The cultivated cells were separated into five groups: blank control group (Ctrl), negative control group (si-Ctrl), si-BCAT1-825 group, si-BCAT1-914 group, si-BCAT1-1280 group, si-BCAT1-1521 group, si-BCAT1-1280 group, si-IFNGR2-734, si-IFNGR2-442, si-IFNGR2-365, si-IFNGR2-906. GenePharma designed the small-interfering RNA (siRNA) sequences. Transfection was performed when the cell density in the 6-well plates reached 30%–60%. A mixture of 100 pmol of siRNA, 125 mL of buffer, and 7.5 mL of siRNA-mate plus ( GenePharma，China) was generated and thoroughly mixed. The transfection mixture was added to each well of a 6-well plate containing 786-O and OS-RC-2 cells and gently agitated. The plates were incubated in a CO2 incubator ( Thermo Fisher Scientific，USA) at 37 °C with 5% CO2 for 24 h for RT-qPCR detection. The most effective siRNA was selected for further research, as determined by significant reduction in PCR.

Short-hairpin RNA (shRNA) targeting *BCAR1* and *IFNGR2* were also synthesized by GenePharma (Shanghai, China). The target sequences were as follows: shBCAT1:5'-CCATTCTTCAAGACTTAGTTA-3', shIFNGR2: CGTCGTCTTGACTTTGGCAAA. For cell transfection, shRNAs and vector/scramble shRNA plasmids were transfected into 786-O cell line at 37 °C for 24 h using Lipofectamine® 3000 ( Thermo Fisher Scientific，USA).

**1.2 Transwell invasion assay**

The cells were routinely digested and counted; for this experiment, the cells were re-suspended in 4 mL serum-free RPMI 1640 medium (Wisent, Canada) to make a 5 × 105/mL cell suspension. After the matrigel was coated on the upper surface of the transwell chamber (8 μm, Corning, USA), the cell suspension (100 μL) was transferred on the upper layer of matrigel. The lower compartment was filled with 700 μL of RPMI 1640 medium (Wisent, Canada) containing 20% FBS, with three replicate wells per group. After 24 h of routine culture in a 37 °C incubator, the cells were fixed with 4% paraformaldehyde. The cells in the upper layer of the transwell chamber were wiped with a cotton swab and stained with 0.1% crystal violet solution for 30 min. The central field of the chamber was photographed using an inverted microscope. The number of crystal violet-stained cells was counted using ImageJ- Pro Plus 6.0 software.

**1.3 Wound healing assay**

Approximately 1 × 106 cells transfected with different siRNAs were seeded into 6-well plates and incubated at 37 °C until they reached a confluence of at least 90%. Wounds were created by scratching the cell monolayers with a 200 μL plastic pipette tip and then incubated in fresh medium containing 2% fetal bovine serum (FBS) for 12 h. Photographs of the wounds were taken to estimate the mean number of migrating cells per field.
