# Supplementary material
Source: Research Square preprint supplement (doi:10.21203/rs.3.rs-6711579/v1)
Supplement: Supplementary file 2 [file bb22711f3019f695d0cd2b15.xlsx]

## Sheet: Table.S1A
GSE15641.top
ID	adj.P.Val	P.Value	t	B	logFC	Gene.symbol	Gene.title
32209_at	4.79e-51	2.15e-55	65.633	115.337	3.22264	FAM89B	family with sequence similarity 89 member B
160020_at	3.95e-50	3.55e-54	62.4414	112.714	3.58316	MMP14	matrix metallopeptidase 14
65588_at	8.87e-48	1.2e-51	56.2891	107.207	3.37208	SNHG17	small nucleolar RNA host gene 17
37424_at	6.83e-47	1.23e-50	53.9948	104.982	3.13038	CCHCR1	coiled-coil alpha-helical rod protein 1
215895_x_at	1.25e-46	2.8e-50	53.2038	104.191	6.06556	PLIN2	perilipin 2
52741_at	6.16e-45	1.66e-48	49.4506	100.26	2.90456	TRMT61A	tRNA methyltransferase 61A
222052_at	1.01e-42	3.18e-46	44.9907	95.1599	2.57688	C19orf54	chromosome 19 open reading frame 54
210287_s_at	1.46e-41	5.26e-45	42.7677	92.4195	4.02224	FLT1	fms related tyrosine kinase 1
215383_x_at	6e-41	2.42e-44	41.6012	90.9231	4.00742	SPG21	spastic paraplegia 21 (autosomal recessive, Mast syndrome)
214048_at	6.62e-41	2.97e-44	41.4478	90.7231	6.40444	MBD4	methyl-CpG binding domain 4, DNA glycosylase
214745_at	6.62e-41	3.27e-44	41.3756	90.6288	3.29819	PLCH1	phospholipase C eta 1
218720_x_at	1.28e-40	6.91e-44	40.8192	89.896	2.92245	SEZ6L2	seizure related 6 homolog like 2
222089_s_at	2.03e-40	1.18e-43	40.4216	89.3662	2.414	C16orf71	chromosome 16 open reading frame 71
39891_at	4.88e-40	3.07e-43	39.7294	88.4314	1.84046	ZNF710	zinc finger protein 710
210081_at	5.81e-40	3.99e-43	39.5401	88.1729	3.5433	AGER	advanced glycosylation end-product specific receptor
91682_at	5.81e-40	4.18e-43	-39.5068	88.1273	-2.49455
206716_at	7.79e-40	5.95e-43	-39.2538	87.7796	-5.61096	UMOD	uromodulin
213830_at	1.08e-39	8.73e-43	38.9814	87.4028	3.24157	YME1L1	YME1 like 1 ATPase
40020_at	2.08e-39	1.77e-42	38.482	86.7051	2.66892	CELSR3	cadherin EGF LAG seven-pass G-type receptor 3
210786_s_at	7.02e-39	6.3e-42	37.6022	85.4541	3.1028	FLI1	Fli-1 proto-oncogene, ETS transcription factor
217567_at	1.68e-38	1.61e-41	36.9647	84.5295	2.75195	TGM4	transglutaminase 4
211463_at	1.68e-38	1.66e-41	36.9446	84.5	2.45577	ZIC4	Zic family member 4
206409_at	1.8e-38	1.86e-41	36.8665	84.3857	2.8998	TIAM1	T-cell lymphoma invasion and metastasis 1
222379_at	2.57e-38	2.77e-41	36.6003	83.994	3.91046	KCNE4	potassium voltage-gated channel subfamily E regulatory subunit 4
217302_at	2.84e-38	3.19e-41	-36.5061	83.8547	-3.31536	OR2F2	olfactory receptor family 2 subfamily F member 2
207548_at	3.56e-38	4.15e-41	36.3294	83.5925	3.57528	LOC100996542///GRM7	uncharacterized LOC100996542///glutamate metabotropic receptor 7
217677_at	6.01e-38	7.29e-41	35.9575	83.0365	3.30896	PLEKHA2	pleckstrin homology domain containing A2
212405_s_at	6.06e-38	7.71e-41	35.9206	82.9811	2.25133	METTL13	methyltransferase like 13
214467_at	6.06e-38	7.9e-41	35.9047	82.9572	3.03524	GPR65	G protein-coupled receptor 65
209103_s_at	6.5e-38	8.76e-41	35.8362	82.8541	2.63571	UFD1L	ubiquitin fusion degradation 1 like (yeast)
218871_x_at	1.32e-37	1.84e-40	35.3543	82.123	4.12478	CSGALNACT2	chondroitin sulfate N-acetylgalactosaminyltransferase 2
211496_s_at	1.63e-37	2.35e-40	35.1957	81.8803	3.18228	PDC	phosducin
213697_at	4.05e-37	6e-40	34.5945	80.9506	2.51446	HIPK3	homeodomain interacting protein kinase 3
220459_at	4.6e-37	7.02e-40	34.4942	80.7939	2.62965	MCM3AP-AS1	MCM3AP antisense RNA 1
217247_at	4.82e-37	7.58e-40	34.4463	80.719	3.45065
31835_at	5.23e-37	8.46e-40	-34.3766	80.6098	-3.39912	HRG	histidine rich glycoprotein
217078_s_at	1.12e-36	1.9e-39	33.8689	79.8076	2.78731	CD300A	CD300a molecule
213879_at	1.12e-36	1.92e-39	33.8628	79.798	3.31715
44783_s_at	2.88e-36	5.04e-39	33.266	78.8402	2.73601	HEY1	hes related family bHLH transcription factor with YRPW motif 1
52837_at	2.93e-36	5.27e-39	33.2386	78.7957	2.20752	KIAA1644	KIAA1644
204393_s_at	3.46e-36	6.37e-39	-33.1227	78.6077	-3.13313	ACPP	acid phosphatase, prostate
210339_s_at	4.43e-36	8.36e-39	32.9568	78.3376	2.39064	KLK2	kallikrein related peptidase 2
222335_at	4.48e-36	8.65e-39	32.9359	78.3033	3.33842
206781_at	6.95e-36	1.4e-38	-32.6459	77.8275	-2.01259	DNAJC4	DnaJ heat shock protein family (Hsp40) member C4
206099_at	6.95e-36	1.4e-38	32.6427	77.8223	2.6206	PRKCH	protein kinase C eta
205691_at	7.57e-36	1.6e-38	-32.5658	77.6954	-2.15796	SYNGR3	synaptogyrin 3
205100_at	7.57e-36	1.6e-38	32.5644	77.6931	2.57052	GFPT2	glutamine-fructose-6-phosphate transaminase 2
64064_at	1.08e-35	2.34e-38	32.3366	77.3157	1.95801	GIMAP1-GIMAP5///GIMAP5	GIMAP1-GIMAP5 readthrough///GTPase, IMAP family member 5
217344_at	1.08e-35	2.38e-38	32.3251	77.2966	2.53984
221852_at	1.11e-35	2.48e-38	32.3006	77.2558	1.77997
216368_s_at	1.13e-35	2.58e-38	32.2783	77.2187	2.16903	COL4A3	collagen type IV alpha 3 chain
215158_s_at	1.48e-35	3.47e-38	32.1017	76.9239	2.38211	DEDD	death effector domain containing
209628_at	2.83e-35	6.74e-38	31.7096	76.2638	2.47337	NXT2	nuclear transport factor 2 like export factor 2
216522_at	3.66e-35	8.87e-38	-31.5484	75.9902	-3.44252	OR2B6	olfactory receptor family 2 subfamily B member 6
211768_at	4.56e-35	1.13e-37	31.4088	75.7522	1.96317	LAT2	linker for activation of T-cells family member 2
214537_at	4.98e-35	1.25e-37	31.3476	75.6475	2.44	HIST1H1D	histone cluster 1, H1d
208414_s_at	5.95e-35	1.52e-37	31.2332	75.4515	2.25616	HOXB3	homeobox B3
216025_x_at	6.29e-35	1.64e-37	31.1913	75.3795	2.03522	CYP2C9	cytochrome P450 family 2 subfamily C member 9
207044_at	6.59e-35	1.75e-37	31.1544	75.316	1.5119	THRB	thyroid hormone receptor beta
219252_s_at	7.19e-35	1.94e-37	-31.0942	75.2123	-2.34524	GEMIN8	gem nuclear organelle associated protein 8
202691_at	7.25e-35	2e-37	31.0752	75.1795	2.19994	SNRPD1	small nuclear ribonucleoprotein D1 polypeptide
212685_s_at	7.25e-35	2.02e-37	31.0709	75.1721	2.84429	TBL2	transducin (beta)-like 2
219380_x_at	8.13e-35	2.3e-37	30.9954	75.0417	3.82178	POLH	DNA polymerase eta
214636_at	8.86e-35	2.55e-37	-30.9373	74.9411	-2.66863	CALCB	calcitonin related polypeptide beta
205855_at	9.54e-35	2.79e-37	-30.8854	74.8512	-2.18489	ZNF197	zinc finger protein 197
220857_at	1.08e-34	3.2e-37	-30.8069	74.7147	-2.28674
204211_x_at	1.41e-34	4.28e-37	30.6406	74.4248	2.25503	EIF2AK2	eukaryotic translation initiation factor 2 alpha kinase 2
215740_at	1.41e-34	4.3e-37	30.6372	74.4188	2.93911	LOC100130741	uncharacterized LOC100130741
220792_at	1.59e-34	4.93e-37	30.5591	74.2822	2.25927	PRDM5	PR/SET domain 5
203877_at	1.73e-34	5.44e-37	-30.5032	74.1842	-1.94062	MMP11	matrix metallopeptidase 11
214861_at	2.01e-34	6.42e-37	30.4098	74.0199	2.35083	KDM4C	lysine demethylase 4C
205699_at	2.21e-34	7.13e-37	-30.3504	73.9153	-2.50373	MAP2K6	mitogen-activated protein kinase kinase 6
216882_s_at	2.39e-34	7.83e-37	30.2977	73.8223	2.14404	NEBL	nebulette
211910_at	2.71e-34	9e-37	30.2193	73.6836	2.55486
210675_s_at	3.25e-34	1.1e-36	30.1089	73.4879	3.03404	PTPRR	protein tyrosine phosphatase, receptor type R
207724_s_at	5.25e-34	1.81e-36	29.8282	72.987	3.03048	SPAST	spastin
215897_at	5.25e-34	1.83e-36	-29.8217	72.9755	-2.2385	MED25	mediator complex subunit 25
212059_s_at	5.25e-34	1.84e-36	29.8196	72.9718	1.89786	TRPC4AP	transient receptor potential cation channel subfamily C member 4 associated protein
207338_s_at	6.07e-34	2.15e-36	29.7315	72.8136	2.03755	ZNF200	zinc finger protein 200
207198_s_at	6.25e-34	2.25e-36	29.7078	72.7711	2.49983	LIMS4///LIMS1	LIM zinc finger domain containing 4///LIM zinc finger domain containing 1
213415_at	6.25e-34	2.27e-36	29.7015	72.7596	2.34976	CLIC2	chloride intracellular channel 2
216440_at	8.51e-34	3.13e-36	-29.5244	72.4403	-2.94825
217619_x_at	9.97e-34	3.72e-36	-29.4305	72.2702	-3.10595
215293_s_at	1.2e-33	4.53e-36	29.3216	72.0724	1.69412	PGAP2	post-GPI attachment to proteins 2
220835_s_at	1.2e-33	4.57e-36	-29.3174	72.0646	-2.80341	ZNF407	zinc finger protein 407
210140_at	1.48e-33	5.76e-36	29.1905	71.8333	2.96968	CST7	cystatin F
204943_at	1.48e-33	5.78e-36	29.1886	71.8297	2.00139	ADAM12	ADAM metallopeptidase domain 12
221634_at	1.89e-33	7.47e-36	29.0492	71.5744	2.71205	RPL23AP7///CENPBD1P1	ribosomal protein L23a pseudogene 7///CENPB DNA-binding domains containing 1 pseudogene 1
209315_at	2.09e-33	8.35e-36	28.9881	71.4622	3.07858	HBS1L	HBS1 like translational GTPase
44563_at	2.72e-33	1.1e-35	28.8386	71.1866	1.61666	WRAP53	WD repeat containing antisense to TP53
206329_at	2.78e-33	1.14e-35	-28.8219	71.1557	-1.85137	EXTL1	exostosin like glycosyltransferase 1
210402_at	2.85e-33	1.18e-35	-28.8021	71.1191	-3.24258	KCNJ1	potassium voltage-gated channel subfamily J member 1
215301_at	3.21e-33	1.35e-35	28.7277	70.9814	2.88759	SYCE1L	synaptonemal complex central element protein 1 like
220725_x_at	3.21e-33	1.36e-35	28.726	70.9782	3.20013	DNAH3	dynein axonemal heavy chain 3
217469_at	3.83e-33	1.63e-35	28.6262	70.7929	1.75041	IGH	immunoglobulin heavy locus
216966_at	4.11e-33	1.77e-35	-28.5832	70.7129	-2.38294	ITGA2B	integrin subunit alpha 2b
211460_at	4.23e-33	1.85e-35	-28.5588	70.6674	-2.51114	TTTY9B///TTTY9A	testis-specific transcript, Y-linked 9B (non-protein coding)///testis-specific transcript, Y-linked 9A (non-protein coding)
204911_s_at	4.23e-33	1.87e-35	28.5544	70.6591	2.3937	TRIM3	tripartite motif containing 3
77508_r_at	4.23e-33	1.88e-35	-28.551	70.6528	-1.98597	RABEP2	rabaptin, RAB GTPase binding effector protein 2
202638_s_at	4.33e-33	1.94e-35	28.5329	70.619	2.59255	ICAM1	intercellular adhesion molecule 1
209244_s_at	4.43e-33	2.01e-35	28.5156	70.5867	1.99042	KIF1C	kinesin family member 1C
207050_at	4.43e-33	2.03e-35	-28.5105	70.5773	-2.17921	CACNA2D1	calcium voltage-gated channel auxiliary subunit alpha2delta 1
213963_s_at	4.92e-33	2.28e-35	28.4483	70.461	1.48837	SAP30	Sin3A associated protein 30
216205_s_at	5.1e-33	2.38e-35	28.424	70.4156	2.80969	MFN2	mitofusin 2
34449_at	5.19e-33	2.46e-35	-28.4065	70.3829	-2.18341	CASP2	caspase 2
207973_x_at	5.19e-33	2.47e-35	28.4047	70.3795	1.81729	ACRV1	acrosomal vesicle protein 1
201252_at	5.73e-33	2.76e-35	28.3468	70.271	2.32393	PSMC4	proteasome 26S subunit, ATPase 4
203362_s_at	5.77e-33	2.8e-35	28.3387	70.2557	3.53648	MAD2L1	MAD2 mitotic arrest deficient-like 1 (yeast)
207991_x_at	5.92e-33	2.9e-35	28.3202	70.2208	1.74701	ACRV1	acrosomal vesicle protein 1
206150_at	6.17e-33	3.05e-35	28.2929	70.1697	2.51397	CD27	CD27 molecule
216058_s_at	7e-33	3.49e-35	-28.2215	70.0353	-2.17145	CYP2C19	cytochrome P450 family 2 subfamily C member 19
216927_at	7.67e-33	3.86e-35	-28.1683	69.935	-2.19684	MAU2	MAU2 sister chromatid cohesion factor
215323_at	8.4e-33	4.26e-35	-28.1156	69.8355	-2.9898	LUZP2	leucine zipper protein 2
221678_at	8.44e-33	4.32e-35	-28.1083	69.8217	-2.7771	ABHD6	abhydrolase domain containing 6
211413_s_at	1.02e-32	5.29e-35	28.0017	69.6197	2.66532	PADI4	peptidyl arginine deiminase 4
217409_at	1.1e-32	5.73e-35	-27.9599	69.5404	-2.36677
54037_at	1.22e-32	6.43e-35	27.899	69.4246	2.45508	HPS4	HPS4, biogenesis of lysosomal organelles complex 3 subunit 2
214263_x_at	1.24e-32	6.55e-35	27.8895	69.4064	2.08952	POLR2C	RNA polymerase II subunit C
219056_at	1.33e-32	7.1e-35	27.8474	69.3261	2.48604	RNASEH2B	ribonuclease H2 subunit B
208585_at	1.39e-32	7.48e-35	27.8199	69.2738	2.35756	BTN2A3P	butyrophilin subfamily 2 member A3, pseudogene
208738_x_at	1.7e-32	9.21e-35	27.711	69.0656	1.33932	LOC101929087///SUMO2///SUMO3	small ubiquitin-related modifier 2 pseudogene///small ubiquitin-like modifier 2///small ubiquitin-like modifier 3
217009_at	1.82e-32	9.97e-35	-27.6701	68.9872	-2.26012	PGK2	phosphoglycerate kinase 2
202415_s_at	1.92e-32	1.06e-34	27.6382	68.9259	1.42635	HSPBP1	HSPA (Hsp70) binding protein 1
201819_at	2.04e-32	1.14e-34	27.6022	68.8568	3.6596	SCARB1	scavenger receptor class B member 1
219266_at	2.15e-32	1.21e-34	27.5685	68.7921	1.99799	ZNF350	zinc finger protein 350
214106_s_at	2.15e-32	1.22e-34	-27.5661	68.7875	-2.1217	GMDS	GDP-mannose 4,6-dehydratase
207544_s_at	2.31e-32	1.32e-34	-27.5256	68.7094	-2.15073	ADH6	alcohol dehydrogenase 6 (class V)
209851_at	2.36e-32	1.36e-34	27.5096	68.6787	1.8521	ZC3H13	zinc finger CCCH-type containing 13
214592_s_at	2.61e-32	1.51e-34	27.453	68.5694	2.31173	SNAPC5	small nuclear RNA activating complex polypeptide 5
207085_x_at	2.65e-32	1.55e-34	27.4424	68.549	2.6273	CSF2RA	colony stimulating factor 2 receptor alpha subunit
218637_at	2.76e-32	1.63e-34	27.4159	68.4977	2.97121	IMPACT	impact RWD domain protein
211489_at	3.1e-32	1.84e-34	-27.3534	68.3767	-2.77604	ADRA1A	adrenoceptor alpha 1A
215015_at	3.76e-32	2.25e-34	-27.2496	68.1753	-2.26601	BICDL1	BICD family like cargo adaptor 1
206281_at	4.19e-32	2.52e-34	-27.1906	68.0606	-1.89974	ADCYAP1	adenylate cyclase activating polypeptide 1
203111_s_at	4.35e-32	2.64e-34	27.1667	68.014	1.97143	PTK2B	protein tyrosine kinase 2 beta
213755_s_at	4.66e-32	2.85e-34	27.1277	67.9378	1.94938	SKI	SKI proto-oncogene
211579_at	5.05e-32	3.11e-34	27.0833	67.8512	2.17474	ITGB3	integrin subunit beta 3
219886_at	5.18e-32	3.21e-34	-27.066	67.8172	-2.86098	CEP97	centrosomal protein 97
207971_s_at	5.34e-32	3.34e-34	-27.0455	67.7771	-1.67397	CEP68	centrosomal protein 68
208496_x_at	5.34e-32	3.36e-34	27.0431	67.7726	2.06051	HIST1H3G	histone cluster 1, H3g
206740_x_at	5.87e-32	3.72e-34	26.9917	67.6718	2.24326	SYCP1	synaptonemal complex protein 1
211993_at	5.97e-32	3.81e-34	26.9792	67.6474	2.11957	WNK1	WNK lysine deficient protein kinase 1
210578_at	6.22e-32	4.02e-34	-26.9513	67.5926	-1.76742	TRIM10	tripartite motif containing 10
201035_s_at	6.22e-32	4.02e-34	-26.9512	67.5924	-2.32374	HADH	hydroxyacyl-CoA dehydrogenase
206873_at	9.01e-32	5.87e-34	26.7599	67.2155	2.45774	CA6	carbonic anhydrase 6
202248_at	1.16e-31	7.59e-34	-26.6294	66.9573	-1.61563	E2F4	E2F transcription factor 4
207267_s_at	1.3e-31	8.56e-34	-26.5692	66.8377	-2.40767	RIPPLY3	ripply transcriptional repressor 3
210021_s_at	1.35e-31	8.99e-34	-26.5445	66.7887	-2.33642	CCNO	cyclin O
34726_at	1.52e-31	1.02e-33	26.4816	66.6633	2.34885	CACNB3	calcium voltage-gated channel auxiliary subunit beta 3
215271_at	1.57e-31	1.06e-33	-26.4635	66.6273	-2.30506	TNN	tenascin N
216771_at	1.69e-31	1.15e-33	-26.422	66.5444	-3.62446	LOC101926997	uncharacterized LOC101926997
204786_s_at	1.86e-31	1.27e-33	26.372	66.4443	2.88616	IFNAR2	interferon alpha and beta receptor subunit 2
210164_at	2.13e-31	1.47e-33	26.2995	66.2992	2.77101	GZMB	granzyme B
207694_at	2.28e-31	1.58e-33	26.2633	66.2265	2.15875	POU3F4	POU class 3 homeobox 4
217222_at	2.41e-31	1.68e-33	-26.2313	66.1623	-1.70325	IGHG1	immunoglobulin heavy constant gamma 1 (G1m marker)
206032_at	2.52e-31	1.77e-33	26.2068	66.113	2.79002	DSC3	desmocollin 3
211515_s_at	2.64e-31	1.86e-33	26.1812	66.0614	2.36552	DSTYK	dual serine/threonine and tyrosine protein kinase
210821_x_at	3.59e-31	2.55e-33	26.0237	65.7435	1.65235	CENPA	centromere protein A
214826_at	3.59e-31	2.56e-33	-26.0223	65.7406	-3.67745	PDE12	phosphodiesterase 12
206111_at	3.92e-31	2.81e-33	25.9761	65.6469	2.44098	RNASE2	ribonuclease A family member 2
205159_at	4.17e-31	3.02e-33	25.9415	65.5768	2.2412	CSF2RB	colony stimulating factor 2 receptor beta common subunit
221530_s_at	5.23e-31	3.81e-33	25.8275	65.3448	4.72605	BHLHE41	basic helix-loop-helix family member e41
222152_at	5.44e-31	3.99e-33	25.8047	65.2986	2.2814	PDCD6	programmed cell death 6
215114_at	5.48e-31	4.04e-33	-25.7987	65.2861	-1.47572	SENP3	SUMO1/sentrin/SMT3 specific peptidase 3
208802_at	6.1e-31	4.53e-33	25.7422	65.1709	2.12557	SRP72	signal recognition particle 72
217733_s_at	6.1e-31	4.55e-33	25.7396	65.1656	2.21557	TMSB10	thymosin beta 10
220219_s_at	7.04e-31	5.28e-33	-25.6668	65.0165	-1.92724	LRRC37A2///LRRC37A3///LRRC37A4P///LRRC37A	leucine rich repeat containing 37 member A2///leucine rich repeat containing 37 member A3///leucine rich repeat containing 37 member A4, pseudogene///leucine rich repeat containing 37A
213651_at	7.39e-31	5.58e-33	-25.6401	64.9619	-1.60876	INPP5J	inositol polyphosphate-5-phosphatase J
220086_at	7.63e-31	5.79e-33	25.622	64.9248	2.10025	IKZF5	IKAROS family zinc finger 5
220601_at	9.48e-31	7.24e-33	25.513	64.7007	2.21403	C16orf70	chromosome 16 open reading frame 70
218812_s_at	1.01e-30	7.76e-33	-25.4792	64.6309	-3.33082	ORAI2	ORAI calcium release-activated calcium modulator 2
214195_at	1.03e-30	7.99e-33	-25.4654	64.6025	-1.89375	TPP1	tripeptidyl peptidase 1
221640_s_at	1.47e-30	1.14e-32	25.2926	64.2451	2.09015	PIDD1	p53-induced death domain protein 1
32540_at	1.57e-30	1.23e-32	-25.2565	64.1701	-2.12665	PPP3CC	protein phosphatase 3 catalytic subunit gamma
220405_at	1.59e-30	1.25e-32	-25.25	64.1564	-3.20475	SNTG1	syntrophin gamma 1
217953_at	1.72e-30	1.36e-32	25.2084	64.07	2.9595	PHF3	PHD finger protein 3
222077_s_at	1.92e-30	1.53e-32	25.1522	63.9529	3.75986	RACGAP1	Rac GTPase activating protein 1
206869_at	2.17e-30	1.73e-32	-25.0917	63.8267	-1.59242	CHAD	chondroadherin
211556_at	2.44e-30	1.96e-32	-25.0332	63.7042	-2.37857	MAPRE2	microtubule associated protein RP/EB family member 2
204110_at	2.54e-30	2.06e-32	25.01	63.6558	2.00166	HNMT	histamine N-methyltransferase
208307_at	2.81e-30	2.29e-32	24.9589	63.5485	1.75613	RBMY1J///RBMY1E///RBMY1D///RBMY1B///RBMY1F///RBMY1A1	RNA binding motif protein, Y-linked, family 1, member J///RNA binding motif protein, Y-linked, family 1, member E///RNA binding motif protein, Y-linked, family 1, member D///RNA binding motif protein, Y-linked, family 1, member B///RNA binding motif protein, Y-linked, family 1, member F///RNA binding motif protein, Y-linked, family 1, member A1
221890_at	2.85e-30	2.33e-32	24.9507	63.5314	1.63503	ZNF335	zinc finger protein 335
219489_s_at	2.92e-30	2.4e-32	24.9367	63.5019	2.32457	NXN	nucleoredoxin
210144_at	3.42e-30	2.82e-32	24.8587	63.338	2.12942	TBC1D22A	TBC1 domain family member 22A
207682_s_at	3.83e-30	3.19e-32	24.8013	63.2169	2.33769	KIF25	kinesin family member 25
201265_at	3.98e-30	3.32e-32	-24.7811	63.1742	-1.62014
210967_x_at	4.75e-30	3.99e-32	-24.6946	62.9913	-1.95334	CACNB1	calcium voltage-gated channel auxiliary subunit beta 1
220420_at	5.32e-30	4.49e-32	24.6384	62.8721	2.16279	LMAN1L	lectin, mannose binding 1 like
211484_s_at	5.36e-30	4.55e-32	24.6328	62.8602	2.3003	DSCAM	DS cell adhesion molecule
210464_at	5.72e-30	4.88e-32	-24.5991	62.7888	-2.09849	LINC00588	long intergenic non-protein coding RNA 588
214873_at	5.85e-30	5.02e-32	-24.5866	62.7622	-2.22427	LRP5L	LDL receptor related protein 5 like
214961_at	6.02e-30	5.19e-32	24.5708	62.7284	2.53082	MTUS2	microtubule associated tumor suppressor candidate 2
216547_at	6.13e-30	5.31e-32	24.5596	62.7046	1.51536
207662_at	6.55e-30	5.71e-32	-24.5258	62.6326	-1.51899	TBX1	T-box 1
210808_s_at	8.51e-30	7.46e-32	-24.4004	62.3649	-2.46414	NOX1	NADPH oxidase 1
45633_at	8.67e-30	7.66e-32	24.3876	62.3376	2.46741	GINS3	GINS complex subunit 3
213881_x_at	8.67e-30	7.67e-32	24.3872	62.3366	0.955	LOC101929087///SUMO2///SUMO3	small ubiquitin-related modifier 2 pseudogene///small ubiquitin-like modifier 2///small ubiquitin-like modifier 3
216326_s_at	9.11e-30	8.1e-32	24.3613	62.2813	1.35415	HDAC3	histone deacetylase 3
215686_x_at	9.32e-30	8.33e-32	-24.3483	62.2533	-2.08465	TFAP2B	transcription factor AP-2 beta
202585_s_at	9.35e-30	8.4e-32	24.3445	62.2452	2.3801	NFX1	nuclear transcription factor, X-box binding 1
216417_x_at	9.43e-30	8.51e-32	24.3383	62.2319	2.20666	HOXB9	homeobox B9
206918_s_at	9.82e-30	8.91e-32	24.317	62.1863	2.29674	CPNE1	copine 1
203034_s_at	1.07e-29	9.74e-32	24.2753	62.0967	1.1053	SNORA3A///RPL27A	small nucleolar RNA, H/ACA box 3A///ribosomal protein L27a
1431_at	1.1e-29	1.01e-31	24.2589	62.0614	2.72959	CYP2E1	cytochrome P450 family 2 subfamily E member 1
211224_s_at	1.2e-29	1.11e-31	24.2158	61.9686	1.93021	ABCB11	ATP binding cassette subfamily B member 11
AFFX-ThrX-5_at	1.35e-29	1.25e-31	24.16	61.8483	1.56363
220716_at	1.5e-29	1.4e-31	24.1082	61.7365	2.41483	ERCC8	ERCC excision repair 8, CSA ubiquitin ligase complex subunit
205909_at	1.54e-29	1.44e-31	24.0932	61.704	1.57685	POLE2	DNA polymerase epsilon 2, accessory subunit
205317_s_at	1.55e-29	1.46e-31	-24.0878	61.6923	-1.73599	SLC15A2	solute carrier family 15 member 2
217984_at	1.76e-29	1.66e-31	24.029	61.5651	3.54111	RNASET2	ribonuclease T2
218227_at	1.8e-29	1.7e-31	24.016	61.5367	1.97917	NUBP2	nucleotide binding protein 2
210079_x_at	1.85e-29	1.76e-31	-23.9996	61.5012	-1.93462	KCNAB1	potassium voltage-gated channel subfamily A member regulatory beta subunit 1
213358_at	1.85e-29	1.77e-31	23.9988	61.4994	2.296	MTCL1	microtubule crosslinking factor 1
214286_at	1.95e-29	1.87e-31	-23.9723	61.4419	-1.58507	GNAT1	G protein subunit alpha transducin 1
204146_at	1.95e-29	1.88e-31	23.9694	61.4357	2.43156	RAD51AP1	RAD51 associated protein 1
218244_at	1.95e-29	1.89e-31	23.9679	61.4324	1.92658	NOL8	nucleolar protein 8
222075_s_at	1.96e-29	1.91e-31	23.9623	61.4202	1.95271	OAZ3	ornithine decarboxylase antizyme 3
210349_at	2.05e-29	2e-31	-23.9408	61.3736	-1.61296	CAMK4	calcium/calmodulin dependent protein kinase IV
220161_s_at	2.17e-29	2.14e-31	-23.9111	61.309	-1.94824	EPB41L4B	erythrocyte membrane protein band 4.1 like 4B
207365_x_at	2.26e-29	2.24e-31	23.8902	61.2633	2.60452	USP34	ubiquitin specific peptidase 34
215953_at	2.3e-29	2.28e-31	-23.8817	61.2449	-2.34996	SMG7-AS1	SMG7 antisense RNA 1
206054_at	2.36e-29	2.36e-31	-23.8662	61.2111	-3.78278	KNG1	kininogen 1
216161_at	2.39e-29	2.39e-31	23.8592	61.1957	1.97008	SBNO1	strawberry notch homolog 1
219583_s_at	2.42e-29	2.44e-31	23.8506	61.177	2.64512	SPATA7	spermatogenesis associated 7
215767_at	2.57e-29	2.6e-31	-23.821	61.1125	-3.14117	ZNF804A	zinc finger protein 804A
214282_at	2.7e-29	2.74e-31	23.7965	61.0588	5.53037
201288_at	2.7e-29	2.75e-31	23.7955	61.0567	1.99139	ARHGDIB	Rho GDP dissociation inhibitor beta
221468_at	2.87e-29	2.94e-31	-23.7642	60.9882	-1.75164	XCR1	X-C motif chemokine receptor 1
204239_s_at	3.13e-29	3.22e-31	-23.7236	60.8994	-2.56945	NNAT	neuronatin
215758_x_at	3.56e-29	3.67e-31	23.6628	60.7661	1.93785	ZNF93	zinc finger protein 93
213890_x_at	3.59e-29	3.72e-31	23.6567	60.7525	0.94068	RPS16	ribosomal protein S16
217215_s_at	3.94e-29	4.1e-31	23.6124	60.6552	1.98672
219301_s_at	3.94e-29	4.12e-31	23.6107	60.6515	1.74595	CNTNAP2	contactin associated protein-like 2
207175_at	4.06e-29	4.26e-31	-23.5951	60.6172	-3.14941	ADIPOQ	adiponectin, C1Q and collagen domain containing
218487_at	4.27e-29	4.5e-31	-23.57	60.5618	-2.62237	ALAD	aminolevulinate dehydratase
206881_s_at	4.29e-29	4.54e-31	23.566	60.553	1.77398	LILRA3	leukocyte immunoglobulin like receptor A3
215536_at	4.53e-29	4.82e-31	23.5386	60.4927	2.15474	HLA-DQB2	major histocompatibility complex, class II, DQ beta 2
215324_at	4.65e-29	4.97e-31	23.525	60.4626	2.13777	SEMA3D	semaphorin 3D
206375_s_at	5.42e-29	5.82e-31	23.4536	60.3049	1.89634	HSPB3	heat shock protein family B (small) member 3
220281_at	5.78e-29	6.23e-31	-23.4228	60.2367	-7.17358	SLC12A1	solute carrier family 12 member 1
206899_at	5.89e-29	6.38e-31	-23.4119	60.2125	-1.82709	NTSR2	neurotensin receptor 2
208297_s_at	6.15e-29	6.7e-31	-23.3897	60.1634	-2.24027	EVI5	ecotropic viral integration site 5
208030_s_at	6.15e-29	6.71e-31	23.389	60.1618	2.32985	ADD1	adducin 1
220625_s_at	6.99e-29	7.66e-31	-23.3292	60.0291	-2.22509	ELF5	E74 like ETS transcription factor 5
216059_at	7.32e-29	8.06e-31	-23.3064	59.9783	-2.0285	PAX3	paired box 3
205023_at	7.4e-29	8.19e-31	23.2993	59.9625	2.02808	RAD51	RAD51 recombinase
204817_at	7.4e-29	8.21e-31	-23.2982	59.9601	-1.80582	ESPL1	extra spindle pole bodies like 1, separase
204971_at	8.66e-29	9.65e-31	23.2253	59.7977	3.11936	CSTA	cystatin A
221337_s_at	8.7e-29	9.73e-31	-23.2213	59.7888	-1.84738	LOC101928551///ADAM29	uncharacterized LOC101928551///ADAM metallopeptidase domain 29
218985_at	1.07e-28	1.21e-30	23.1248	59.5731	2.03913	SLC2A8	solute carrier family 2 member 8
221246_x_at	1.08e-28	1.21e-30	-23.1218	59.5664	-2.30629	TNS1	tensin 1
208874_x_at	1.13e-28	1.29e-30	23.0955	59.5076	2.3379	PTPA	protein phosphatase 2 phosphatase activator
216898_s_at	1.13e-28	1.29e-30	-23.0938	59.5037	-3.94376	COL4A3	collagen type IV alpha 3 chain
205778_at	1.13e-28	1.29e-30	-23.0936	59.5034	-1.18005	KLK7	kallikrein related peptidase 7
202037_s_at	1.2e-28	1.37e-30	-23.067	59.4437	-2.33365	SFRP1	secreted frizzled related protein 1
218566_s_at	1.24e-28	1.43e-30	-23.0502	59.4059	-2.4141	CHORDC1	cysteine and histidine rich domain containing 1
215870_s_at	1.24e-28	1.43e-30	23.0497	59.4048	1.94816	PLA2G5	phospholipase A2 group V
217393_x_at	1.65e-28	1.92e-30	22.9182	59.1088	1.72688	UBE2NL	ubiquitin conjugating enzyme E2 N like (gene/pseudogene)
205102_at	1.79e-28	2.09e-30	-22.8804	59.0237	-1.83192	TMPRSS2	transmembrane protease, serine 2
215490_at	1.97e-28	2.3e-30	22.8378	58.9273	2.19395	IBA57	IBA57 homolog, iron-sulfur cluster assembly
216378_at	2e-28	2.34e-30	22.8288	58.907	2.8092
203713_s_at	2.06e-28	2.43e-30	22.8131	58.8714	2.21146	LLGL2	LLGL2, scribble cell polarity complex component
216188_at	2.06e-28	2.43e-30	-22.8125	58.8701	-2.06654	MYCNOS	MYCN opposite strand
212097_at	2.18e-28	2.58e-30	22.7857	58.8095	3.71347	CAV1	caveolin 1
201020_at	2.2e-28	2.62e-30	22.7801	58.7968	2.49595	YWHAH	tyrosine 3-monooxygenase/tryptophan 5-monooxygenase activation protein eta
221093_at	2.36e-28	2.83e-30	-22.7461	58.7195	-1.63838	BRD7P3	bromodomain containing 7 pseudogene 3
208583_x_at	2.53e-28	3.04e-30	-22.7143	58.6473	-1.97786	HIST1H2AJ	histone cluster 1, H2aj
213965_s_at	2.82e-28	3.39e-30	22.6652	58.5356	1.56279	CHD5	chromodomain helicase DNA binding protein 5
210617_at	2.83e-28	3.42e-30	22.6613	58.5268	1.90968	PHEX	phosphate regulating endopeptidase homolog, X-linked
216890_at	2.97e-28	3.6e-30	22.639	58.4761	1.42665
222241_at	3.16e-28	3.85e-30	22.6093	58.4085	2.09203	MVB12B	multivesicular body subunit 12B
208037_s_at	3.64e-28	4.45e-30	22.5462	58.2643	1.53277	MADCAM1	mucosal vascular addressin cell adhesion molecule 1
219955_at	3.75e-28	4.6e-30	-22.5316	58.231	-2.27664	L1TD1	LINE1 type transposase domain containing 1
220017_x_at	3.8e-28	4.69e-30	22.5231	58.2115	1.67422	CYP2C9	cytochrome P450 family 2 subfamily C member 9
203870_at	3.8e-28	4.69e-30	-22.523	58.2112	-1.87148	USP46	ubiquitin specific peptidase 46
208443_x_at	4.06e-28	5.04e-30	22.4916	58.1394	2.49548	SHOX2	short stature homeobox 2
215510_at	4.64e-28	5.79e-30	22.4304	57.999	1.48609	ETV2	ETS variant 2
221130_s_at	4.64e-28	5.8e-30	-22.4298	57.9977	-1.64362
207579_at	4.65e-28	5.83e-30	-22.4279	57.9932	-1.53273	MAGEB3	MAGE family member B3
202676_x_at	4.65e-28	5.87e-30	22.4243	57.9851	2.27655	FASTK	Fas activated serine/threonine kinase
1316_at	4.65e-28	5.87e-30	-22.4243	57.985	-1.66464	THRA	thyroid hormone receptor, alpha
217081_at	5.07e-28	6.42e-30	-22.3851	57.895	-2.22885	OR2H2	olfactory receptor family 2 subfamily H member 2
216763_at	5.36e-28	6.82e-30	-22.3591	57.8352	-1.94154
206222_at	5.68e-28	7.25e-30	22.3323	57.7734	1.58513	TNFRSF10C	TNF receptor superfamily member 10c
222272_x_at	5.75e-28	7.37e-30	-22.3254	57.7576	-2.48254	SCIN	scinderin
34225_at	6.11e-28	7.85e-30	-22.2975	57.6932	-1.39324	MIR943///NELFA	microRNA 943///negative elongation factor complex member A
218844_at	6.32e-28	8.15e-30	-22.2815	57.6563	-2.27343	ACSF2	acyl-CoA synthetase family member 2
207240_s_at	6.61e-28	8.55e-30	22.2604	57.6076	2.52273	LHCGR	luteinizing hormone/choriogonadotropin receptor
213513_x_at	7.28e-28	9.45e-30	22.217	57.5073	1.61197	ARPC2	actin related protein 2/3 complex subunit 2
219262_at	7.39e-28	9.62e-30	22.2092	57.4892	1.89911	SUV39H2	suppressor of variegation 3-9 homolog 2
204024_at	7.59e-28	9.92e-30	22.1962	57.459	1.7809	OSGIN2	oxidative stress induced growth inhibitor family member 2
210210_at	7.87e-28	1.03e-29	22.1788	57.4189	2.62156	MPZL1	myelin protein zero like 1
217091_at	1.07e-27	1.4e-29	-22.0456	57.1094	-2.7323
207018_s_at	1.08e-27	1.43e-29	-22.0385	57.0929	-2.89873	RAB27B	RAB27B, member RAS oncogene family
211923_s_at	1.12e-27	1.49e-29	-22.0206	57.0514	-1.80479	ZNF471	zinc finger protein 471
208004_at	1.15e-27	1.53e-29	22.0094	57.025	1.79364	OPRPN	opiorphin prepropeptide
208253_at	1.23e-27	1.64e-29	21.9784	56.9528	1.87644	SIGLEC8	sialic acid binding Ig like lectin 8
38398_at	1.29e-27	1.72e-29	-21.9577	56.9045	-1.32847	MADD	MAP kinase activating death domain
207918_s_at	1.41e-27	1.9e-29	-21.916	56.8071	-1.82557	TSPY10///TSPY8///TSPY4///TSPY3///TSPY1	testis specific protein, Y-linked 10///testis specific protein, Y-linked 8///testis specific protein, Y-linked 4///testis specific protein, Y-linked 3///testis specific protein, Y-linked 1
208366_at	1.68e-27	2.27e-29	21.84	56.6291	2.65742	PCDH11X	protocadherin 11 X-linked
205144_at	1.75e-27	2.37e-29	21.8208	56.584	1.7472	MFSD7	major facilitator superfamily domain containing 7
212375_at	1.83e-27	2.48e-29	-21.8018	56.5395	-1.64377	EP400	E1A binding protein p400
206879_s_at	1.86e-27	2.54e-29	-21.792	56.5164	-3.11523	NRG2	neuregulin 2
211889_x_at	1.88e-27	2.57e-29	-21.7859	56.5021	-1.56612	CEACAM1	carcinoembryonic antigen related cell adhesion molecule 1
217036_at	1.96e-27	2.69e-29	-21.7674	56.4584	-1.61413
220636_at	2.08e-27	2.86e-29	-21.7413	56.3971	-1.61619	DNAI2	dynein axonemal intermediate chain 2
207624_s_at	2.35e-27	3.23e-29	-21.6883	56.2722	-2.52914	RPGR	retinitis pigmentosa GTPase regulator
220570_at	2.4e-27	3.32e-29	-21.6768	56.245	-1.81516	RETN	resistin
221583_s_at	2.62e-27	3.64e-29	21.6377	56.1526	2.09096	KCNMA1	potassium calcium-activated channel subfamily M alpha 1
216810_at	2.7e-27	3.75e-29	-21.625	56.1227	-2.56544	KRTAP4-7	keratin associated protein 4-7
221240_s_at	2.93e-27	4.09e-29	21.5883	56.0358	1.60049	B3GNT4	UDP-GlcNAc:betaGal beta-1,3-N-acetylglucosaminyltransferase 4
221114_at	2.96e-27	4.15e-29	-21.5823	56.0215	-1.81058	AMBN	ameloblastin
212734_x_at	3e-27	4.21e-29	21.576	56.0066	1.14874	SNORD68///RPL13	small nucleolar RNA, C/D box 68///ribosomal protein L13
206072_at	3.05e-27	4.31e-29	21.5667	55.9846	1.83469	UCN	urocortin
222189_at	3.14e-27	4.44e-29	21.5539	55.9544	1.69065	AMBRA1	autophagy and beclin 1 regulator 1
222104_x_at	3.39e-27	4.81e-29	-21.5198	55.8734	-2.94528	GTF2H3	general transcription factor IIH subunit 3
219980_at	3.59e-27	5.11e-29	-21.4942	55.8125	-1.51112	ABHD18	abhydrolase domain containing 18
214687_x_at	3.8e-27	5.43e-29	21.4685	55.7517	1.55455	ALDOA	aldolase, fructose-bisphosphate A
44673_at	3.96e-27	5.68e-29	21.4495	55.7063	1.66462	SIGLEC1	sialic acid binding Ig like lectin 1
220885_s_at	4.18e-27	6.01e-29	21.4259	55.6501	1.81887	CENPJ	centromere protein J
211252_x_at	4.81e-27	6.94e-29	21.3653	55.5056	1.80582	PTCRA	pre T-cell antigen receptor alpha
202237_at	4.93e-27	7.13e-29	21.3535	55.4774	4.34742	LOC101928916///NNMT	uncharacterized LOC101928916///nicotinamide N-methyltransferase
208591_s_at	5.1e-27	7.4e-29	-21.3383	55.4411	-1.6371	PDE3B	phosphodiesterase 3B
205742_at	5.2e-27	7.56e-29	21.3289	55.4186	1.59479	TNNI3	troponin I3, cardiac type
201923_at	5.28e-27	7.71e-29	21.3206	55.3989	2.59924	PRDX4	peroxiredoxin 4
214161_at	5.49e-27	8.04e-29	21.3033	55.3574	1.92176	OSGIN2	oxidative stress induced growth inhibitor family member 2
222005_s_at	5.76e-27	8.46e-29	-21.2819	55.3063	-1.21445	GNG3	G protein subunit gamma 3
210599_at	5.98e-27	8.82e-29	21.2645	55.2646	1.88003	ZNF614	zinc finger protein 614
200019_s_at	6.04e-27	8.93e-29	21.2594	55.2523	1.34656	FAU	FAU, ubiquitin like and ribosomal protein S30 fusion
215156_at	6.1e-27	9.04e-29	21.2539	55.2391	1.1185	WDR61	WD repeat domain 61
200932_s_at	6.36e-27	9.46e-29	21.2351	55.1941	1.27406	DCTN2	dynactin subunit 2
203068_at	6.46e-27	9.65e-29	-21.2268	55.1742	-2.51622	KLHL21	kelch like family member 21
206761_at	6.46e-27	9.67e-29	21.226	55.1721	2.05155	CD96	CD96 molecule
213117_at	6.52e-27	9.78e-29	21.2209	55.16	2.15959	KLHL9	kelch like family member 9
215461_at	7e-27	1.05e-28	-21.19	55.0858	-1.59529	ZNRF4	zinc and ring finger 4
217426_at	7.11e-27	1.08e-28	21.1811	55.0644	1.99483
204733_at	7.11e-27	1.08e-28	-21.1808	55.0637	-1.72475	KLK6	kallikrein related peptidase 6
203889_at	7.53e-27	1.14e-28	21.1559	55.0039	2.40104	SCG5	secretogranin V
210095_s_at	7.55e-27	1.15e-28	21.1536	54.9982	3.15148	IGFBP3	insulin like growth factor binding protein 3
207523_at	7.6e-27	1.16e-28	-21.1497	54.9889	-2.1047	C6orf10	chromosome 6 open reading frame 10
207745_at	7.66e-27	1.17e-28	-21.1453	54.9783	-1.16497	CABP2	calcium binding protein 2
210300_at	7.69e-27	1.18e-28	-21.1422	54.9707	-1.57488	REM1	RRAD and GEM like GTPase 1
201921_at	7.82e-27	1.2e-28	21.1339	54.9508	1.4533	GNG10	G protein subunit gamma 10
203130_s_at	7.94e-27	1.23e-28	21.1264	54.9328	2.10317	KIF5C	kinesin family member 5C
210728_s_at	8.86e-27	1.37e-28	-21.0797	54.82	-1.90645	CALCA	calcitonin related polypeptide alpha
211184_s_at	9.45e-27	1.47e-28	21.0513	54.7516	2.50113	USH1C	USH1 protein network component harmonin
213437_at	1.09e-26	1.69e-28	20.9926	54.6095	2.03908	RUFY3	RUN and FYVE domain containing 3
212161_at	1.1e-26	1.73e-28	-20.9845	54.59	-2.23214	AP2A2	adaptor related protein complex 2 alpha 2 subunit
205760_s_at	1.12e-26	1.76e-28	-20.9763	54.5701	-2.34579	OGG1	8-oxoguanine DNA glycosylase
222016_s_at	1.14e-26	1.8e-28	20.9672	54.5482	1.88404	ZSCAN31	zinc finger and SCAN domain containing 31
215190_at	1.21e-26	1.9e-28	20.9442	54.4923	1.89885	EIF3M	eukaryotic translation initiation factor 3 subunit M
214598_at	1.23e-26	1.94e-28	-20.936	54.4724	-2.65403	CLDN8	claudin 8
216867_s_at	1.25e-26	1.98e-28	20.9275	54.4518	1.72266	PDGFA	platelet derived growth factor subunit A
208586_s_at	1.27e-26	2.02e-28	-20.919	54.4312	-3.36898	SSX4B///SSX4	SSX family member 4B///SSX family member 4
208547_at	1.34e-26	2.14e-28	-20.8949	54.3727	-2.03982	HIST1H2BB	histone cluster 1, H2bb
209909_s_at	1.36e-26	2.17e-28	20.8886	54.3574	2.34187	TGFB2	transforming growth factor beta 2
222196_at	1.43e-26	2.29e-28	20.8675	54.306	3.40653	LOC389906	zinc finger protein 839 pseudogene
219414_at	1.49e-26	2.39e-28	-20.8493	54.2616	-1.91547	CLSTN2	calsyntenin 2
220314_at	1.57e-26	2.53e-28	20.8257	54.2042	1.32588	HSFX1///HSFX2	heat shock transcription factor family, X-linked 1///heat shock transcription factor family, X-linked 2
205966_at	1.59e-26	2.56e-28	20.8207	54.1921	2.74095	TAF13	TATA-box binding protein associated factor 13
205281_s_at	1.64e-26	2.65e-28	-20.8063	54.157	-3.09459	PIGA	phosphatidylinositol glycan anchor biosynthesis class A
AFFX-HUMGAPDH/M33197_3_at	1.74e-26	2.83e-28	20.78	54.093	1.16319	GAPDH	glyceraldehyde-3-phosphate dehydrogenase
221201_s_at	1.89e-26	3.09e-28	-20.7444	54.0059	-1.80321	ZNF155	zinc finger protein 155
207213_s_at	2.14e-26	3.5e-28	-20.6928	53.8797	-1.71908	USP2	ubiquitin specific peptidase 2
210061_at	2.18e-26	3.58e-28	20.6828	53.8552	1.98643	ZNF589	zinc finger protein 589
207881_at	2.18e-26	3.59e-28	-20.6824	53.8542	-2.13503
211972_x_at	2.22e-26	3.65e-28	20.6749	53.8357	1.43955	RPLP0	ribosomal protein lateral stalk subunit P0
215809_at	2.24e-26	3.69e-28	-20.6705	53.825	-1.3794	CYP2D6	cytochrome P450 family 2 subfamily D member 6
210727_at	2.27e-26	3.76e-28	-20.6635	53.8079	-2.15912	CALCA	calcitonin related polypeptide alpha
206757_at	2.44e-26	4.05e-28	-20.6326	53.732	-2.08149	PDE5A	phosphodiesterase 5A
204926_at	2.48e-26	4.13e-28	-20.6244	53.7119	-3.89741	INHBA	inhibin beta A subunit
218261_at	2.71e-26	4.52e-28	-20.5878	53.6221	-1.94524	AP1M2	adaptor related protein complex 1 mu 2 subunit
220632_s_at	2.75e-26	4.62e-28	20.5793	53.6012	2.44194	POMT2	protein O-mannosyltransferase 2
216721_at	2.8e-26	4.71e-28	20.5713	53.5816	1.61014	SLC25A30	solute carrier family 25 member 30
219611_s_at	2.85e-26	4.8e-28	-20.5635	53.5624	-1.38736	CEP85	centrosomal protein 85
212484_at	2.88e-26	4.87e-28	20.5573	53.5471	1.11056	FAM89B	family with sequence similarity 89 member B
206008_at	3.02e-26	5.11e-28	20.5376	53.4987	1.639	TGM1	transglutaminase 1
213084_x_at	3.27e-26	5.55e-28	20.5042	53.4164	0.940401	SNORD42A///RPL23A	small nucleolar RNA, C/D box 42A///ribosomal protein L23a
212984_at	3.46e-26	5.9e-28	20.4792	53.3546	2.80731	ATF2	activating transcription factor 2
219230_at	3.83e-26	6.54e-28	20.4374	53.2514	2.5465	TMEM100	transmembrane protein 100
219120_at	3.86e-26	6.61e-28	20.4328	53.2399	1.72523	WDCP	WD repeat and coiled coil containing
206906_at	4.61e-26	7.91e-28	-20.3601	53.0599	-1.64902	ICAM5	intercellular adhesion molecule 5
214584_x_at	4.83e-26	8.31e-28	-20.3401	53.0103	-2.31837	ACACB	acetyl-CoA carboxylase beta
207116_s_at	4.88e-26	8.42e-28	-20.3346	52.9967	-1.60975	GAPDHS	glyceraldehyde-3-phosphate dehydrogenase, spermatogenic
208258_s_at	4.91e-26	8.49e-28	20.3311	52.9881	2.00628	GAS2L1	growth arrest specific 2 like 1
201029_s_at	5e-26	8.69e-28	20.3218	52.9648	2.01108	CD99	CD99 molecule
221933_at	5e-26	8.7e-28	20.3215	52.9641	2.72312	NLGN4X	neuroligin 4, X-linked
203324_s_at	5.15e-26	8.98e-28	20.3088	52.9326	2.97642	CAV2	caveolin 2
200966_x_at	5.35e-26	9.35e-28	20.2922	52.8914	1.5793	ALDOA	aldolase, fructose-bisphosphate A
208531_at	5.44e-26	9.53e-28	-20.2844	52.8719	-2.04044	SERPINA2	serpin family A member 2 (gene/pseudogene)
202803_s_at	5.63e-26	9.88e-28	20.2698	52.8356	2.58435	ITGB2	integrin subunit beta 2
200618_at	5.8e-26	1.02e-27	20.257	52.8037	1.29424	LASP1	LIM and SH3 protein 1
208271_at	5.81e-26	1.03e-27	-20.2549	52.7986	-1.84051	PAPOLB	poly(A) polymerase beta
215185_at	5.86e-26	1.04e-27	-20.2501	52.7866	-1.61173	LINC00963	long intergenic non-protein coding RNA 963
215275_at	5.87e-26	1.04e-27	20.2488	52.7833	2.12548	TRAF3IP3	TRAF3 interacting protein 3
218753_at	6.35e-26	1.13e-27	20.2161	52.7017	1.42815	XKR8	XK related 8
218164_at	6.35e-26	1.13e-27	20.2151	52.6992	2.5306	SPATA20	spermatogenesis associated 20
205010_at	6.47e-26	1.16e-27	-20.2061	52.677	-1.76268	GNL3L	G protein nucleolar 3 like
202238_s_at	6.49e-26	1.16e-27	20.2041	52.672	4.25983	LOC101928916///NNMT	uncharacterized LOC101928916///nicotinamide N-methyltransferase
200035_at	7.5e-26	1.35e-27	20.1451	52.5246	1.2759	CTDNEP1	CTD nuclear envelope phosphatase 1
205673_s_at	7.77e-26	1.4e-27	-20.1295	52.4855	-1.95125	ASB9	ankyrin repeat and SOCS box containing 9
204196_x_at	7.86e-26	1.42e-27	-20.1235	52.4707	-1.51702	PKNOX1	PBX/knotted 1 homeobox 1
218562_s_at	7.86e-26	1.42e-27	20.1232	52.4699	1.3771	TMEM57	transmembrane protein 57
208340_at	7.89e-26	1.43e-27	-20.1205	52.4632	-1.69999	LOC643733	caspase 4, apoptosis-related cysteine peptidase pseudogene
215637_at	8.13e-26	1.48e-27	-20.1075	52.4306	-1.7321	CEP41	centrosomal protein 41
218897_at	8.18e-26	1.49e-27	-20.1042	52.4224	-1.77991	TMEM177	transmembrane protein 177
214582_at	9.04e-26	1.65e-27	-20.0629	52.3187	-2.04952	PDE3B	phosphodiesterase 3B
217512_at	9.31e-26	1.71e-27	-20.0502	52.287	-2.89986	KNG1	kininogen 1
213923_at	9.41e-26	1.73e-27	20.0451	52.274	2.0227	RAP2B	RAP2B, member of RAS oncogene family
200788_s_at	9.9e-26	1.82e-27	20.0238	52.2206	1.53473	PEA15	phosphoprotein enriched in astrocytes 15
217937_s_at	1.11e-25	2.04e-27	19.9782	52.1061	1.88714	HDAC7	histone deacetylase 7
217028_at	1.11e-25	2.05e-27	19.9766	52.1019	3.47633	CXCR4	C-X-C motif chemokine receptor 4
217573_at	1.2e-25	2.22e-27	19.9448	52.022	1.2299	GRIN2C	glutamate ionotropic receptor NMDA type subunit 2C
219596_at	1.35e-25	2.51e-27	19.8954	51.8974	1.59367	THAP10	THAP domain containing 10
203233_at	1.37e-25	2.55e-27	19.8898	51.8832	2.3412	IL4R	interleukin 4 receptor
215366_at	1.41e-25	2.63e-27	-19.8771	51.851	-1.55934	SNX13	sorting nexin 13
216537_s_at	1.42e-25	2.67e-27	19.8719	51.8381	1.49127	SIGLEC7	sialic acid binding Ig like lectin 7
205556_at	1.46e-25	2.73e-27	-19.8619	51.8127	-3.84284	MSX2	msh homeobox 2
217522_at	1.47e-25	2.77e-27	19.8562	51.7982	1.96365	KCNV2	potassium voltage-gated channel modifier subfamily V member 2
217349_s_at	1.5e-25	2.83e-27	-19.8487	51.7794	-1.57534	PRICKLE3	prickle planar cell polarity protein 3
202953_at	1.5e-25	2.84e-27	19.8469	51.7747	3.78855	C1QB	complement C1q B chain
209632_at	1.52e-25	2.88e-27	19.8414	51.7608	3.3394	PPP2R3A	protein phosphatase 2 regulatory subunit B''alpha
220920_at	1.57e-25	2.98e-27	-19.8275	51.7257	-2.65694	ATP10B	ATPase phospholipid transporting 10B (putative)
213938_at	1.64e-25	3.13e-27	-19.8083	51.6772	-1.53493	ERC2	ELKS/RAB6-interacting/CAST family member 2
200665_s_at	1.66e-25	3.17e-27	19.8034	51.6648	2.23377	SPARC	secreted protein acidic and cysteine rich
216631_s_at	1.69e-25	3.24e-27	19.7944	51.6419	1.28471	HLA-DPA2	major histocompatibility complex, class II, DP alpha 2 (pseudogene)
219563_at	1.72e-25	3.3e-27	19.7866	51.6221	1.62502	SYNE3///LINC00341	spectrin repeat containing nuclear envelope family member 3///long intergenic non-protein coding RNA 341
208834_x_at	1.9e-25	3.65e-27	19.7467	51.521	0.933851	SNORD42A///RPL23A	small nucleolar RNA, C/D box 42A///ribosomal protein L23a
209615_s_at	1.97e-25	3.79e-27	-19.7322	51.484	-1.58073	PAK1	p21 (RAC1) activated kinase 1
200040_at	1.98e-25	3.82e-27	19.7294	51.4769	1.09823	KHDRBS1	KH RNA binding domain containing, signal transduction associated 1
213166_x_at	2.05e-25	3.98e-27	19.713	51.4354	1.80267	MIR4784///MZT2A///MZT2B	microRNA 4784///mitotic spindle organizing protein 2A///mitotic spindle organizing protein 2B
205118_at	2.05e-25	3.98e-27	-19.7124	51.4339	-2.03077	FPR1	formyl peptide receptor 1
204296_at	2.13e-25	4.14e-27	-19.6974	51.3957	-1.71989	SLC4A5	solute carrier family 4 member 5
219074_at	2.22e-25	4.32e-27	19.6805	51.3526	1.77601	TMEM184C	transmembrane protein 184C
214267_s_at	2.28e-25	4.45e-27	-19.669	51.3233	-1.34289	CADM4	cell adhesion molecule 4
211072_x_at	2.31e-25	4.52e-27	19.6629	51.3079	1.71308	TUBA1B	tubulin alpha 1b
221700_s_at	2.38e-25	4.67e-27	19.6499	51.2746	1.26326	UBA52	ubiquitin A-52 residue ribosomal protein fusion product 1
215725_at	2.42e-25	4.77e-27	-19.6414	51.253	-1.3965	DGCR11	DiGeorge syndrome critical region gene 11 (non-protein coding)
200017_at	2.45e-25	4.83e-27	19.6365	51.2405	0.796187	RPS27A	ribosomal protein S27a
218863_s_at	2.45e-25	4.84e-27	-19.6356	51.2383	-1.63169	TNS1	tensin 1
210565_at	2.49e-25	4.93e-27	-19.6282	51.2194	-1.35544	GCGR	glucagon receptor
207322_at	2.64e-25	5.25e-27	-19.6037	51.1569	-1.70745	ITSN1	intersectin 1
56197_at	2.64e-25	5.25e-27	19.6035	51.1565	1.17039	TMEM256-PLSCR3///PLSCR3	TMEM256-PLSCR3 readthrough (NMD candidate)///phospholipid scramblase 3
200822_x_at	2.78e-25	5.55e-27	19.5815	51.1003	1.57266	TPI1	triosephosphate isomerase 1
202052_s_at	2.81e-25	5.62e-27	19.5767	51.0879	2.02649	RAI14	retinoic acid induced 14
206404_at	2.88e-25	5.78e-27	-19.566	51.0606	-2.47627	FGF9	fibroblast growth factor 9
214595_at	3.05e-25	6.12e-27	19.5431	51.002	1.89854	KCNG1	potassium voltage-gated channel modifier subfamily G member 1
216090_x_at	3.07e-25	6.18e-27	-19.5397	50.9933	-1.65375
207646_s_at	3.09e-25	6.23e-27	-19.5363	50.9846	-1.50899	CDY1B///CDY2B///CDY2A///CDY1	chromodomain Y-linked 1B///chromodomain Y-linked 2B///chromodomain Y-linked 2A///chromodomain Y-linked 1
219519_s_at	3.11e-25	6.28e-27	19.5332	50.9767	1.56606	SIGLEC1	sialic acid binding Ig like lectin 1
201492_s_at	3.12e-25	6.32e-27	19.5304	50.9694	0.755034	RPL41	ribosomal protein L41
203012_x_at	3.16e-25	6.42e-27	19.5245	50.9543	0.957946	RPL23A	ribosomal protein L23a
206792_x_at	3.25e-25	6.63e-27	19.5116	50.9213	2.18166	LOC729966///PDE4C	uncharacterized LOC729966///phosphodiesterase 4C
216077_s_at	3.25e-25	6.64e-27	-19.5114	50.921	-1.57615	L3MBTL1	l(3)mbt-like 1 (Drosophila)
202712_s_at	3.27e-25	6.69e-27	-19.5084	50.9133	-1.42318	CKMT1A///CKMT1B	creatine kinase, mitochondrial 1A///creatine kinase, mitochondrial 1B
213208_at	3.3e-25	6.75e-27	19.5047	50.9036	2.0691	GLTSCR1L	GLTSCR1 like
208825_x_at	3.31e-25	6.8e-27	19.5017	50.896	0.941672	SNORD42A///RPL23A	small nucleolar RNA, C/D box 42A///ribosomal protein L23a
219992_at	3.62e-25	7.45e-27	-19.4662	50.805	-1.12645	TAC3	tachykinin 3
214638_s_at	4.54e-25	9.35e-27	-19.3771	50.5758	-2.48122	CCNT2	cyclin T2
208519_x_at	4.56e-25	9.42e-27	19.3742	50.5685	1.47033	GNRH2	gonadotropin releasing hormone 2
37201_at	4.65e-25	9.63e-27	-19.3655	50.5461	-1.13085	ITIH4	inter-alpha-trypsin inhibitor heavy chain family member 4
218954_s_at	4.67e-25	9.7e-27	-19.3628	50.5391	-1.31836	BRF2	BRF2, RNA polymerase III transcription initiation factor 50 kDa subunit
203484_at	4.72e-25	9.82e-27	19.3578	50.5262	2.11622	SEC61G	Sec61 translocon gamma subunit
208695_s_at	5.28e-25	1.1e-26	19.3136	50.4122	1.00047	RPL39	ribosomal protein L39
206981_at	5.33e-25	1.11e-26	-19.3094	50.4014	-1.57691	SCN4A	sodium voltage-gated channel alpha subunit 4
206047_at	5.36e-25	1.12e-26	-19.3062	50.3931	-1.19528	GNB3	G protein subunit beta 3
204963_at	5.4e-25	1.13e-26	19.3023	50.3829	2.50583	SSPN	sarcospan
209443_at	5.4e-25	1.14e-26	-19.3014	50.3808	-2.54603	SERPINA5	serpin family A member 5
219086_at	5.61e-25	1.18e-26	-19.2857	50.3401	-1.28777	ZNF839	zinc finger protein 839
41469_at	5.63e-25	1.19e-26	19.2838	50.3352	2.49114	PI3	peptidase inhibitor 3
210278_s_at	5.84e-25	1.24e-26	-19.2682	50.295	-1.81017	AP4S1	adaptor related protein complex 4 sigma 1 subunit
222263_at	5.93e-25	1.26e-26	19.2621	50.279	1.8814	SLC35E1	solute carrier family 35 member E1
212976_at	5.93e-25	1.26e-26	19.2612	50.2767	1.78564	LRRC8B	leucine rich repeat containing 8 family member B
220893_at	5.98e-25	1.27e-26	-19.2568	50.2653	-2.063	LOC57399	uncharacterized gastric protein ZA52P
216057_at	6.24e-25	1.33e-26	-19.2396	50.2208	-3.48333	RAB3GAP2	RAB3 GTPase activating non-catalytic protein subunit 2
211424_x_at	6.25e-25	1.34e-26	19.2382	50.2172	3.59101	METTL7A	methyltransferase like 7A
211623_s_at	6.25e-25	1.34e-26	19.2374	50.2152	1.7568	FBL	fibrillarin
216759_at	6.6e-25	1.42e-26	-19.2155	50.1585	-1.47496	HRASLS2	HRAS like suppressor 2
206585_at	6.64e-25	1.43e-26	19.2121	50.1497	1.69418	MKRN3	makorin ring finger protein 3
211926_s_at	7.27e-25	1.57e-26	19.1764	50.057	2.67472	MYH9	myosin, heavy chain 9, non-muscle
204107_at	7.41e-25	1.6e-26	-19.168	50.0352	-1.2872	NFYA	nuclear transcription factor Y subunit alpha
205428_s_at	7.45e-25	1.61e-26	-19.1646	50.0265	-1.86585	CALB2	calbindin 2
210604_at	7.45e-25	1.62e-26	19.1642	50.0253	1.88531	GNAT2	G protein subunit alpha transducin 2
209263_x_at	7.45e-25	1.62e-26	19.1634	50.0233	1.3561	TSPAN4	tetraspanin 4
206087_x_at	7.48e-25	1.63e-26	19.1611	50.0172	1.40755	HFE	hemochromatosis
207270_x_at	7.94e-25	1.73e-26	19.1371	49.955	1.03231	CD300C	CD300c molecule
221739_at	8.51e-25	1.86e-26	19.1096	49.8835	1.72919	MYDGF	myeloid derived growth factor
213920_at	8.88e-25	1.95e-26	-19.0922	49.8382	-1.69788	CUX2	cut like homeobox 2
221170_at	8.9e-25	1.95e-26	-19.0907	49.8341	-1.85178	HRH4	histamine receptor H4
213206_at	9.08e-25	2e-26	-19.082	49.8116	-2.25392	GOSR2	golgi SNAP receptor complex member 2
221359_at	1.03e-24	2.27e-26	19.0334	49.6848	1.16151	GDNF	glial cell derived neurotrophic factor
214216_s_at	1.04e-24	2.3e-26	-19.0273	49.669	-1.53122	LARP4B	La ribonucleoprotein domain family member 4B
213769_at	1.04e-24	2.31e-26	19.0268	49.6676	1.72111	KSR1	kinase suppressor of ras 1
41220_at	1.06e-24	2.34e-26	19.0208	49.6519	1.49529	2024-09-09	septin 9
211058_x_at	1.08e-24	2.39e-26	19.0123	49.6299	1.72834	TUBA1B	tubulin alpha 1b
202957_at	1.09e-24	2.44e-26	19.0055	49.612	2.33526	HCLS1	hematopoietic cell-specific Lyn substrate 1
206784_at	1.1e-24	2.46e-26	-19.0013	49.601	-1.22605	AQP8	aquaporin 8
210504_at	1.15e-24	2.57e-26	18.9849	49.5583	1.30779	KLF1	Kruppel like factor 1
204314_s_at	1.17e-24	2.63e-26	18.9765	49.5362	2.36787	CREB1	cAMP responsive element binding protein 1
211092_s_at	1.21e-24	2.71e-26	18.9645	49.5048	1.60985	NF2	neurofibromin 2
217295_at	1.22e-24	2.74e-26	-18.9604	49.4942	-1.47786	MUC8	mucin 8
219107_at	1.24e-24	2.81e-26	18.9513	49.4703	1.4616	BCAN	brevican
213181_s_at	1.28e-24	2.89e-26	18.9397	49.4399	2.33634	MOCS1	molybdenum cofactor synthesis 1
213535_s_at	1.33e-24	3.01e-26	18.9245	49.4001	1.36247	UBE2I	ubiquitin conjugating enzyme E2 I
212933_x_at	1.4e-24	3.18e-26	18.9032	49.3442	1.06514	SNORD68///RPL13	small nucleolar RNA, C/D box 68///ribosomal protein L13
210150_s_at	1.43e-24	3.25e-26	18.8946	49.3217	2.58671	LAMA5	laminin subunit alpha 5
200716_x_at	1.49e-24	3.38e-26	18.8797	49.2824	1.11817	RPL13AP5///SNORD32A///SNORD33///SNORD34///SNORD35A///RPL13A	ribosomal protein L13a pseudogene 5///small nucleolar RNA, C/D box 32A///small nucleolar RNA, C/D box 33///small nucleolar RNA, C/D box 34///small nucleolar RNA, C/D box 35A///ribosomal protein L13a
214891_at	1.55e-24	3.55e-26	-18.8615	49.2348	-1.53225	FBXO21	F-box protein 21
37145_at	1.62e-24	3.71e-26	18.8445	49.1902	1.45343	GNLY	granulysin
204885_s_at	1.63e-24	3.74e-26	18.8411	49.1811	2.8886	MSLN	mesothelin
35820_at	1.63e-24	3.75e-26	18.84	49.1782	1.54543	GM2A	GM2 ganglioside activator
222205_x_at	1.68e-24	3.87e-26	-18.828	49.1466	-1.66455	FAM27B///FAM27C///FAM182B	family with sequence similarity 27 member B///family with sequence similarity 27 member C///family with sequence similarity 182 member B
206346_at	1.7e-24	3.91e-26	-18.8241	49.1363	-1.98389	PRLR	prolactin receptor
220197_at	1.78e-24	4.11e-26	-18.8047	49.0855	-1.86359	ATP6V0A4	ATPase H+ transporting V0 subunit a4
202823_at	1.8e-24	4.17e-26	18.7996	49.0718	2.46204	TCEB1	transcription elongation factor B subunit 1
205852_at	1.82e-24	4.21e-26	-18.7958	49.0619	-1.57074	CDK5R2	cyclin dependent kinase 5 regulatory subunit 2
45687_at	1.85e-24	4.3e-26	18.7875	49.04	0.955749	PRR14	proline rich 14
219597_s_at	1.86e-24	4.32e-26	18.7865	49.0373	1.91524	DUOX1	dual oxidase 1
206332_s_at	1.87e-24	4.35e-26	18.7836	49.0297	2.51665	IFI16	interferon gamma inducible protein 16
220913_at	1.93e-24	4.51e-26	18.7693	48.9921	1.56809
204129_at	2.01e-24	4.7e-26	18.754	48.9517	1.17299	BCL9	B-cell CLL/lymphoma 9
220723_s_at	2.01e-24	4.72e-26	-18.7526	48.948	-1.55305	CWH43	cell wall biogenesis 43 C-terminal homolog
207635_s_at	2.04e-24	4.8e-26	-18.7459	48.9302	-1.10503	KCNH1	potassium voltage-gated channel subfamily H member 1
217663_at	2.13e-24	5.01e-26	-18.7295	48.887	-1.9457	ZNF234	zinc finger protein 234
210435_at	2.13e-24	5.01e-26	18.7293	48.8866	1.95761	ARL17B///ARL17A	ADP ribosylation factor like GTPase 17B///ADP ribosylation factor like GTPase 17A
202519_at	2.19e-24	5.17e-26	18.7175	48.8554	2.0917	MLXIP	MLX interacting protein
221344_at	2.2e-24	5.2e-26	18.7158	48.8507	1.58275	OR12D2	olfactory receptor family 12 subfamily D member 2 (gene/pseudogene)
215948_x_at	2.53e-24	6.01e-26	-18.6606	48.7049	-1.31646	ZMYM5	zinc finger MYM-type containing 5
205694_at	2.67e-24	6.34e-26	-18.6403	48.651	-2.51757	TYRP1	tyrosinase related protein 1
211439_at	2.67e-24	6.35e-26	-18.6392	48.6482	-1.61314	SRSF7	serine and arginine rich splicing factor 7
208966_x_at	2.79e-24	6.65e-26	18.6222	48.6029	2.45183	IFI16	interferon gamma inducible protein 16
213739_at	2.95e-24	7.05e-26	-18.5999	48.5438	-1.32647	LOC103344931	uncharacterized LOC103344931
206605_at	3e-24	7.18e-26	18.5927	48.5247	2.02516	ENDOU	endonuclease, poly(U) specific
208130_s_at	3.02e-24	7.25e-26	18.5892	48.5155	1.9168	TBXAS1	thromboxane A synthase 1
214166_at	3.16e-24	7.59e-26	18.5719	48.4694	1.29639	SDHB	succinate dehydrogenase complex iron sulfur subunit B
211831_s_at	3.22e-24	7.76e-26	-18.5636	48.4474	-1.82309	THPO	thrombopoietin
213248_at	3.24e-24	7.82e-26	18.5606	48.4394	1.88897	LOC730101	uncharacterized LOC730101
210991_s_at	3.38e-24	8.18e-26	-18.5436	48.3942	-1.25916	RIMS3	regulating synaptic membrane exocytosis 3
220616_at	3.55e-24	8.6e-26	-18.5246	48.3438	-1.1974	ZNF384	zinc finger protein 384
207345_at	3.56e-24	8.63e-26	-18.5234	48.3404	-1.67674	FST	follistatin
214372_x_at	3.8e-24	9.24e-26	18.4974	48.2713	1.6337	ERN2	endoplasmic reticulum to nucleus signaling 2
201254_x_at	3.8e-24	9.24e-26	18.4973	48.271	0.848487	RPS6	ribosomal protein S6
201818_at	3.84e-24	9.37e-26	18.4922	48.2574	3.05173	LPCAT1	lysophosphatidylcholine acyltransferase 1
207090_x_at	3.96e-24	9.68e-26	18.4798	48.2244	1.67521	ZFP30	ZFP30 zinc finger protein
211046_at	4.06e-24	9.93e-26	-18.4703	48.1989	-2.00249	KCNH6	potassium voltage-gated channel subfamily H member 6
207988_s_at	4.1e-24	1e-25	18.4658	48.1869	1.60949	ARPC2	actin related protein 2/3 complex subunit 2
214003_x_at	4.26e-24	1.05e-25	18.4503	48.1456	1.00651	SNORD54///RPS20	small nucleolar RNA, C/D box 54///ribosomal protein S20
201090_x_at	4.37e-24	1.08e-25	18.4401	48.1184	1.82142	TUBA1B	tubulin alpha 1b
221798_x_at	4.59e-24	1.13e-25	18.421	48.0674	1.32816
51158_at	4.81e-24	1.19e-25	-18.4028	48.0185	-2.38102	FAM174B	family with sequence similarity 174 member B
210358_x_at	4.83e-24	1.2e-25	-18.4005	48.0126	-1.13253	GATA2	GATA binding protein 2
214858_at	4.92e-24	1.22e-25	18.393	47.9923	1.93747	PP14571	uncharacterized LOC100130449
217584_at	4.92e-24	1.22e-25	-18.3924	47.9907	-1.70825	NPC1	NPC intracellular cholesterol transporter 1
201838_s_at	4.93e-24	1.23e-25	-18.3903	47.9853	-1.08729	SUPT7L	SPT7-like STAGA complex gamma subunit
211325_x_at	4.98e-24	1.24e-25	18.3865	47.9749	2.99144	DSTNP2	destrin, actin depolymerizing factor pseudogene 2
221647_s_at	4.98e-24	1.24e-25	18.3856	47.9725	1.08041	MIR6743///RIC8A	microRNA 6743///RIC8 guanine nucleotide exchange factor A
220685_at	5.22e-24	1.3e-25	18.3675	47.9242	1.49966	FAM120C	family with sequence similarity 120C
218554_s_at	5.3e-24	1.33e-25	18.3605	47.9053	1.67212	ASH1L	ASH1 like histone lysine methyltransferase
203768_s_at	5.31e-24	1.33e-25	18.3592	47.9019	1.80256	STS	steroid sulfatase (microsomal), isozyme S
213466_at	5.38e-24	1.35e-25	18.3535	47.8867	1.3348	RAB40C	RAB40C, member RAS oncogene family
202397_at	5.38e-24	1.36e-25	18.3533	47.8861	1.2403	NUTF2P4///NUTF2	nuclear transport factor 2 pseudogene 4///nuclear transport factor 2
201981_at	5.42e-24	1.37e-25	-18.3496	47.8762	-1.51186	PAPPA	pappalysin 1
214564_s_at	5.49e-24	1.39e-25	18.3445	47.8624	2.0808	PCDHGC3	protocadherin gamma subfamily C, 3
215252_at	5.5e-24	1.39e-25	-18.3432	47.859	-1.5976	DNAJC7	DnaJ heat shock protein family (Hsp40) member C7
215613_at	5.51e-24	1.4e-25	-18.3416	47.8546	-1.38434	ADAM12	ADAM metallopeptidase domain 12
217452_s_at	5.54e-24	1.41e-25	18.3386	47.8468	2.37576	B3GALT2	beta-1,3-galactosyltransferase 2
215851_at	5.56e-24	1.41e-25	-18.3372	47.8428	-1.83701	MECOM	MDS1 and EVI1 complex locus
212433_x_at	5.57e-24	1.42e-25	18.3353	47.8379	1.43608	SNORA64///RPS2	small nucleolar RNA, H/ACA box 64///ribosomal protein S2
208929_x_at	5.61e-24	1.43e-25	18.332	47.8291	1.13692	SNORD68///RPL13	small nucleolar RNA, C/D box 68///ribosomal protein L13
1729_at	5.76e-24	1.48e-25	18.3213	47.8002	1.1988	TRADD	TNFRSF1A associated via death domain
200018_at	5.78e-24	1.48e-25	18.3198	47.7961	0.900027	LOC100508408///SNORD14B///RPS13	uncharacterized LOC100508408///small nucleolar RNA, C/D box 14B///ribosomal protein S13
200025_s_at	5.93e-24	1.52e-25	18.3095	47.7685	1.17619	RPL27	ribosomal protein L27
216799_at	6.14e-24	1.58e-25	-18.2953	47.7304	-1.74447
210129_s_at	6.14e-24	1.58e-25	-18.2951	47.7299	-1.62865	ARPC4-TTLL3///TTLL3///ARPC4	ARPC4-TTLL3 readthrough///tubulin tyrosine ligase like 3///actin related protein 2/3 complex subunit 4
220053_at	6.49e-24	1.68e-25	-18.2737	47.6724	-1.17873	GDF3	growth differentiation factor 3
210291_s_at	6.83e-24	1.77e-25	-18.2541	47.6195	-1.47644	ZNF174	zinc finger protein 174
201642_at	6.86e-24	1.78e-25	18.2517	47.6132	1.5453	IFNGR2	interferon gamma receptor 2 (interferon gamma transducer 1)
219285_s_at	7.06e-24	1.83e-25	-18.24	47.5818	-3.18163	NIN	ninein
208072_s_at	7.17e-24	1.86e-25	18.234	47.5654	1.78899	DGKD	diacylglycerol kinase delta
202276_at	7.65e-24	1.99e-25	18.2088	47.4976	1.40669	SHFM1	split hand/foot malformation (ectrodactyly) type 1
221566_s_at	8.44e-24	2.2e-25	18.1715	47.397	2.53465	NOL3	nucleolar protein 3
200909_s_at	8.65e-24	2.26e-25	18.1616	47.3703	1.27749	SNORA52///RPLP2	small nucleolar RNA, H/ACA box 52///ribosomal protein lateral stalk subunit P2
200792_at	8.67e-24	2.27e-25	18.1602	47.3663	1.0472	XRCC6	X-ray repair cross complementing 6
214064_at	8.69e-24	2.28e-25	-18.1589	47.3631	-1.60103	TF	transferrin
202117_at	9.15e-24	2.41e-25	18.1388	47.3085	1.51765	ARHGAP1	Rho GTPase activating protein 1
31826_at	9.34e-24	2.46e-25	18.1307	47.2867	0.881775	FKBP15	FK506 binding protein 15
206507_at	9.78e-24	2.58e-25	-18.113	47.2389	-2.67265	ZSCAN12	zinc finger and SCAN domain containing 12
203720_s_at	9.87e-24	2.61e-25	18.1087	47.2273	1.0869	ERCC1	ERCC excision repair 1, endonuclease non-catalytic subunit
220980_s_at	1.01e-23	2.68e-25	18.099	47.2009	0.941394	ADPGK	ADP dependent glucokinase
211562_s_at	1.03e-23	2.74e-25	-18.0906	47.1782	-1.38458	LMOD1	leiomodin 1
214476_at	1.06e-23	2.82e-25	18.0803	47.1503	1.99252	TFF2	trefoil factor 2
201623_s_at	1.08e-23	2.87e-25	18.0726	47.1294	1.50893	DARS	aspartyl-tRNA synthetase
213014_at	1.19e-23	3.16e-25	18.0376	47.0345	1.33226	MAPK8IP1	mitogen-activated protein kinase 8 interacting protein 1
210262_at	1.22e-23	3.27e-25	-18.025	47.0002	-1.92208	CRISP2	cysteine rich secretory protein 2
203535_at	1.23e-23	3.28e-25	18.0236	46.9966	2.83918	S100A9	S100 calcium binding protein A9
211295_x_at	1.25e-23	3.34e-25	-18.0169	46.9783	-1.49375	CYP2A6	cytochrome P450 family 2 subfamily A member 6
212251_at	1.25e-23	3.35e-25	18.0158	46.9753	1.77678	MTDH	metadherin
216873_s_at	1.31e-23	3.52e-25	-17.9972	46.9248	-1.1373	ATP8B2	ATPase phospholipid transporting 8B2
208812_x_at	1.38e-23	3.71e-25	17.9781	46.8729	1.52785	HLA-C	major histocompatibility complex, class I, C
210033_s_at	1.44e-23	3.88e-25	17.9612	46.8268	1.6632	SPAG6	sperm associated antigen 6
211687_x_at	1.44e-23	3.89e-25	-17.9605	46.8251	-1.42359	KIR3DL1	killer cell immunoglobulin like receptor, three Ig domains and long cytoplasmic tail 1
215894_at	1.5e-23	4.05e-25	17.9454	46.7839	1.71381	PTGDR	prostaglandin D2 receptor
216526_x_at	1.51e-23	4.1e-25	17.9411	46.7722	1.47284	HLA-C	major histocompatibility complex, class I, C
212737_at	1.62e-23	4.38e-25	17.9163	46.7045	1.88284	GM2A	GM2 ganglioside activator
215991_s_at	1.65e-23	4.48e-25	17.9085	46.6831	1.77957	EMC1	ER membrane protein complex subunit 1
216383_at	1.67e-23	4.56e-25	17.9022	46.6659	1.75547
213491_x_at	1.71e-23	4.66e-25	17.8936	46.6424	1.40245	RPN2	ribophorin II
219867_at	1.75e-23	4.77e-25	-17.8853	46.6199	-1.76123	CHODL	chondrolectin
220794_at	1.75e-23	4.8e-25	-17.8829	46.6133	-1.26046	GREM2	gremlin 2, DAN family BMP antagonist
208805_at	1.76e-23	4.84e-25	17.8801	46.6058	1.17463	KIAA0391///PSMA6	KIAA0391///proteasome subunit alpha 6
201429_s_at	1.78e-23	4.89e-25	17.876	46.5945	0.821988	RPL37A	ribosomal protein L37a
205951_at	1.88e-23	5.17e-25	17.8554	46.5383	2.5307	MYH1	myosin heavy chain 1
221111_at	1.94e-23	5.34e-25	17.8438	46.5064	2.51369	IL26	interleukin 26
219813_at	1.94e-23	5.35e-25	17.8429	46.504	1.81106	LATS1	large tumor suppressor kinase 1
211880_x_at	1.99e-23	5.5e-25	-17.8328	46.4763	-1.56545	PCDHGA1	protocadherin gamma subfamily A, 1
214314_s_at	2.05e-23	5.66e-25	-17.822	46.4467	-4.50225	EIF5B	eukaryotic translation initiation factor 5B
214096_s_at	2.05e-23	5.68e-25	17.821	46.4442	1.90319	SHMT2	serine hydroxymethyltransferase 2
206774_at	2.05e-23	5.69e-25	-17.8205	46.4428	-1.48468	FRMPD1	FERM and PDZ domain containing 1
218051_s_at	2.07e-23	5.75e-25	17.8161	46.4306	1.84733	NT5DC2	5'-nucleotidase domain containing 2
214614_at	2.09e-23	5.82e-25	-17.8122	46.4201	-1.55485	MNX1	motor neuron and pancreas homeobox 1
221346_at	2.13e-23	5.95e-25	-17.8039	46.3972	-1.20313	OR10J1	olfactory receptor family 10 subfamily J member 1
210804_x_at	2.18e-23	6.08e-25	-17.7959	46.3753	-1.32892	SLC8A1	solute carrier family 8 member A1
204658_at	2.21e-23	6.18e-25	17.7901	46.3595	1.70397	TRA2A	transformer 2 alpha homolog
217211_at	2.21e-23	6.2e-25	17.7889	46.3561	2.29414	ACTBP9	actin, beta pseudogene 9
208039_at	2.25e-23	6.31e-25	-17.7822	46.3378	-1.42229	SLC9A2	solute carrier family 9 member A2
214905_at	2.25e-23	6.34e-25	-17.7805	46.3332	-1.26534	RASGRF1	Ras protein specific guanine nucleotide releasing factor 1
208246_x_at	2.26e-23	6.35e-25	-17.7797	46.3308	-2.47833
205812_s_at	2.35e-23	6.63e-25	17.764	46.288	1.80737	TMED9	transmembrane p24 trafficking protein 9
215745_at	2.58e-23	7.28e-25	-17.7296	46.1933	-1.55535
201037_at	2.58e-23	7.29e-25	17.7291	46.192	3.00496	PFKP	phosphofructokinase, platelet
205827_at	2.59e-23	7.33e-25	-17.7271	46.1866	-1.4368	CCK	cholecystokinin
209721_s_at	2.69e-23	7.65e-25	17.7115	46.1436	0.862727	IFFO1	intermediate filament family orphan 1
201091_s_at	2.69e-23	7.66e-25	17.7111	46.1425	1.89755	CBX3	chromobox 3
38703_at	2.7e-23	7.69e-25	17.7099	46.1394	0.989405	DNPEP	aspartyl aminopeptidase
215360_at	2.72e-23	7.76e-25	-17.7065	46.13	-2.12583
200886_s_at	2.9e-23	8.29e-25	17.6822	46.0631	1.55611	PGAM1	phosphoglycerate mutase 1
212995_x_at	3.06e-23	8.75e-25	17.6624	46.0085	1.57088	MZT2A///MZT2B///PHGDH	mitotic spindle organizing protein 2A///mitotic spindle organizing protein 2B///phosphoglycerate dehydrogenase
211066_x_at	3.16e-23	9.06e-25	17.6496	45.9732	1.4626	PCDHGA1///PCDHGA2///PCDHGA3///PCDHGA4///PCDHGA5///PCDHGA6///PCDHGA7///PCDHGA9///PCDHGA10///PCDHGA11///PCDHGB1///PCDHGB2///PCDHGB3///PCDHGB5///PCDHGB6///PCDHGB7///PCDHGC4///PCDHGC5///PCDHGA12///PCDHGA8///PCDHGB4///PCDHGC3	protocadherin gamma subfamily A, 1///protocadherin gamma subfamily A, 2///protocadherin gamma subfamily A, 3///protocadherin gamma subfamily A, 4///protocadherin gamma subfamily A, 5///protocadherin gamma subfamily A, 6///protocadherin gamma subfamily A, 7///protocadherin gamma subfamily A, 9///protocadherin gamma subfamily A, 10///protocadherin gamma subfamily A, 11///protocadherin gamma subfami…
202620_s_at	3.17e-23	9.09e-25	17.6484	45.9701	3.12946	PLOD2	procollagen-lysine,2-oxoglutarate 5-dioxygenase 2
201885_s_at	3.18e-23	9.13e-25	17.647	45.9661	1.33658	CYB5R3	cytochrome b5 reductase 3
200062_s_at	3.19e-23	9.2e-25	17.6443	45.9586	1.12297	RPL30	ribosomal protein L30
213646_x_at	3.3e-23	9.52e-25	17.6315	45.9234	1.7516	TUBA1B	tubulin alpha 1b
208016_s_at	3.39e-23	9.8e-25	-17.6211	45.8946	-1.65246	AGTR1	angiotensin II receptor type 1
220328_at	3.59e-23	1.04e-24	-17.5999	45.8361	-1.86315	PHC3	polyhomeotic homolog 3
215859_at	3.88e-23	1.12e-24	-17.5714	45.7573	-1.93788	NCLN	nicalin
243_g_at	4.07e-23	1.18e-24	17.553	45.7064	1.13213	MAP4	microtubule associated protein 4
207543_s_at	4.12e-23	1.2e-24	17.5485	45.6941	2.02418	P4HA1	prolyl 4-hydroxylase subunit alpha 1
202923_s_at	4.24e-23	1.23e-24	17.5374	45.6632	1.4625	GCLC	glutamate-cysteine ligase catalytic subunit
200832_s_at	4.36e-23	1.27e-24	17.5264	45.6328	3.54023	SCD	stearoyl-CoA desaturase
221749_at	4.46e-23	1.3e-24	17.518	45.6097	1.57612	YTHDF3	YTH N6-methyladenosine RNA binding protein 3
210661_at	4.46e-23	1.31e-24	-17.5167	45.606	-1.89718	GLRA3	glycine receptor alpha 3
203920_at	4.46e-23	1.31e-24	17.5162	45.6045	1.14201	NR1H3	nuclear receptor subfamily 1 group H member 3
216073_at	4.59e-23	1.35e-24	17.5057	45.5754	2.04813	ANKRD34C	ankyrin repeat domain 34C
206085_s_at	4.63e-23	1.36e-24	-17.5019	45.5649	-1.58643	CTH	cystathionine gamma-lyase
216110_x_at	4.64e-23	1.37e-24	-17.5003	45.5607	-2.18929	LOC105373738	uncharacterized LOC105373738
211720_x_at	4.7e-23	1.39e-24	17.4952	45.5463	1.3916	RPLP0	ribosomal protein lateral stalk subunit P0
216600_x_at	4.73e-23	1.4e-24	-17.4922	45.538	-1.21657	ALDOB	aldolase, fructose-bisphosphate B
202030_at	4.78e-23	1.41e-24	17.4882	45.5269	1.42472	BCKDK	branched chain ketoacid dehydrogenase kinase
202202_s_at	4.81e-23	1.42e-24	17.4854	45.5192	3.17114	LAMA4	laminin subunit alpha 4
216017_s_at	4.81e-23	1.43e-24	17.4847	45.5173	1.49856	NAB2	NGFI-A binding protein 2
215237_at	5.05e-23	1.5e-24	17.4668	45.4676	1.70469	DOCK9	dedicator of cytokinesis 9
222094_at	5.25e-23	1.56e-24	-17.4518	45.4259	-1.46166	SLX1A-SULT1A3///SLX1A///SULT1A4///SLX1B///SULT1A3	SLX1A-SULT1A3 readthrough (NMD candidate)///SLX1 homolog A, structure-specific endonuclease subunit///sulfotransferase family 1A member 4///SLX1 homolog B, structure-specific endonuclease subunit///sulfotransferase family 1A member 3
216657_at	5.27e-23	1.57e-24	-17.4502	45.4213	-1.76147	ATXN3	ataxin 3
210646_x_at	5.32e-23	1.59e-24	17.4459	45.4096	1.07828	RPL13AP5///SNORD32A///SNORD33///SNORD34///SNORD35A///RPL13A	ribosomal protein L13a pseudogene 5///small nucleolar RNA, C/D box 32A///small nucleolar RNA, C/D box 33///small nucleolar RNA, C/D box 34///small nucleolar RNA, C/D box 35A///ribosomal protein L13a
200029_at	5.41e-23	1.62e-24	17.4391	45.3907	1.12827	RPL19	ribosomal protein L19
210088_x_at	5.63e-23	1.68e-24	-17.4244	45.3497	-1.2135	MYL4	myosin light chain 4
205376_at	5.64e-23	1.69e-24	17.423	45.3459	2.86072	INPP4B	inositol polyphosphate-4-phosphatase type II B
217881_s_at	5.64e-23	1.69e-24	17.4229	45.3456	1.72587	CDC27	cell division cycle 27
220581_at	5.8e-23	1.74e-24	-17.4119	45.3148	-1.34609	CCDC170	coiled-coil domain containing 170
216323_x_at	5.97e-23	1.8e-24	17.4008	45.2842	1.9179	TUBA3D///TUBA3C	tubulin alpha 3d///tubulin alpha 3c
220215_at	5.98e-23	1.8e-24	-17.3997	45.281	-1.25616	ZNF669	zinc finger protein 669
202312_s_at	6.02e-23	1.82e-24	-17.3968	45.273	-1.34865	COL1A1	collagen type I alpha 1 chain
204643_s_at	6.03e-23	1.82e-24	17.3958	45.2702	1.32841	ENOX2	ecto-NOX disulfide-thiol exchanger 2
207981_s_at	6.18e-23	1.87e-24	-17.3862	45.2434	-3.81353	ESRRG	estrogen related receptor gamma
214351_x_at	6.24e-23	1.89e-24	17.3825	45.233	1.30412	SNORD68///RPL13	small nucleolar RNA, C/D box 68///ribosomal protein L13
52164_at	6.24e-23	1.89e-24	17.382	45.2318	1.24338	C11orf24	chromosome 11 open reading frame 24
221171_at	6.25e-23	1.9e-24	-17.3804	45.2272	-1.2276	CCDC30	coiled-coil domain containing 30
207773_x_at	6.41e-23	1.95e-24	-17.3708	45.2005	-1.47179	CYP3A43	cytochrome P450 family 3 subfamily A member 43
207135_at	6.44e-23	1.96e-24	-17.3687	45.1948	-2.45244	HTR2A	5-hydroxytryptamine receptor 2A
217420_s_at	6.57e-23	2.01e-24	-17.361	45.173	-1.65569	POLR2A	RNA polymerase II subunit A
211469_s_at	6.67e-23	2.04e-24	17.3551	45.1567	1.39007	CXCR6	C-X-C motif chemokine receptor 6
220265_at	7.67e-23	2.35e-24	-17.3042	45.0146	-1.46294	GPR107	G protein-coupled receptor 107
206577_at	7.7e-23	2.36e-24	-17.302	45.0085	-4.4256	VIP	vasoactive intestinal peptide
215180_at	7.7e-23	2.37e-24	-17.3017	45.0077	-1.49899
213503_x_at	7.75e-23	2.39e-24	17.2982	44.998	1.77466	ANXA2	annexin A2
203315_at	7.75e-23	2.39e-24	17.2981	44.9975	1.40488	NCK2	NCK adaptor protein 2
202632_at	7.99e-23	2.46e-24	17.2869	44.9662	0.901391	OVCA2///DPH1	ovarian tumor suppressor candidate 2///diphthamide biosynthesis 1
212790_x_at	8.04e-23	2.48e-24	17.2842	44.9586	1.09063	RPL13AP5///SNORD32A///SNORD33///SNORD34///SNORD35A///RPL13A	ribosomal protein L13a pseudogene 5///small nucleolar RNA, C/D box 32A///small nucleolar RNA, C/D box 33///small nucleolar RNA, C/D box 34///small nucleolar RNA, C/D box 35A///ribosomal protein L13a
213953_at	8.43e-23	2.61e-24	-17.2666	44.9095	-1.415	KRT20	keratin 20
202897_at	8.49e-23	2.63e-24	17.2635	44.9007	2.04117	SIRPA	signal regulatory protein alpha
222384_at	8.55e-23	2.66e-24	-17.2601	44.8913	-1.29179	SMG7-AS1	SMG7 antisense RNA 1
204528_s_at	8.91e-23	2.77e-24	17.2449	44.8488	1.87013	NAP1L1	nucleosome assembly protein 1 like 1
205641_s_at	8.93e-23	2.78e-24	17.2436	44.8451	1.08051	TRADD	TNFRSF1A associated via death domain
216453_at	9.44e-23	2.94e-24	-17.2232	44.7879	-1.40836	ZNF287	zinc finger protein 287
201459_at	9.44e-23	2.95e-24	17.2225	44.786	1.19916	RUVBL2	RuvB like AAA ATPase 2
211414_at	9.67e-23	3.02e-24	-17.2136	44.761	-1.25798	GLS	glutaminase
204279_at	9.67e-23	3.03e-24	17.2131	44.7596	2.862	PSMB9	proteasome subunit beta 9
201622_at	9.87e-23	3.09e-24	17.2052	44.7373	1.45884	SND1	staphylococcal nuclease and tudor domain containing 1
215829_at	9.99e-23	3.14e-24	17.2002	44.7233	1.55164	SHANK2	SH3 and multiple ankyrin repeat domains 2
214378_at	1e-22	3.15e-24	17.1986	44.7189	1.89098	TFPI	tissue factor pathway inhibitor
210032_s_at	1.01e-22	3.19e-24	-17.1942	44.7064	-1.45466	SPAG6	sperm associated antigen 6
205874_at	1.02e-22	3.22e-24	17.1912	44.6981	1.40102	ITPKA	inositol-trisphosphate 3-kinase A
207301_at	1.05e-22	3.31e-24	-17.1811	44.6698	-1.51049	EFNA5	ephrin A5
208690_s_at	1.07e-22	3.39e-24	17.1724	44.6454	1.77907	PDLIM1	PDZ and LIM domain 1
200873_s_at	1.07e-22	3.39e-24	17.172	44.6441	1.36927	CCT8	chaperonin containing TCP1 subunit 8
208445_s_at	1.12e-22	3.55e-24	17.156	44.5991	1.02822	BAZ1B	bromodomain adjacent to zinc finger domain 1B
208260_at	1.15e-22	3.64e-24	17.1468	44.5733	1.29021	AVPR1B	arginine vasopressin receptor 1B
201105_at	1.21e-22	3.84e-24	17.1276	44.5194	2.93221	LGALS1	galectin 1
214160_at	1.22e-22	3.87e-24	-17.1247	44.5112	-1.40261
218814_s_at	1.22e-22	3.9e-24	-17.122	44.5035	-1.49434	TMEM206	transmembrane protein 206
203707_at	1.3e-22	4.15e-24	17.0996	44.4404	1.67494	LINC00921///ZNF263	long intergenic non-protein coding RNA 921///zinc finger protein 263
210527_x_at	1.33e-22	4.25e-24	17.0918	44.4186	1.97461	TUBA3D///TUBA3C	tubulin alpha 3d///tubulin alpha 3c
203901_at	1.39e-22	4.46e-24	-17.0746	44.3699	-1.19	TAB1	TGF-beta activated kinase 1 (MAP3K7) binding protein 1
204122_at	1.45e-22	4.64e-24	17.0601	44.3292	2.89101	TYROBP	TYRO protein tyrosine kinase binding protein
207989_at	1.46e-22	4.68e-24	17.057	44.3203	1.83121	OPRM1	opioid receptor mu 1
209183_s_at	1.48e-22	4.75e-24	17.0515	44.3049	2.8344	C10orf10	chromosome 10 open reading frame 10
216860_s_at	1.51e-22	4.88e-24	17.0425	44.2794	1.55676	GDF11	growth differentiation factor 11
207028_at	1.52e-22	4.9e-24	-17.0404	44.2734	-1.1642	MYCNOS	MYCN opposite strand
201666_at	1.59e-22	5.15e-24	17.0233	44.225	2.83479	TIMP1	TIMP metallopeptidase inhibitor 1
204219_s_at	1.63e-22	5.27e-24	17.0151	44.202	0.915018	PSMC1	proteasome 26S subunit, ATPase 1
205289_at	1.64e-22	5.31e-24	17.0118	44.1925	2.11388	BMP2	bone morphogenetic protein 2
217767_at	1.71e-22	5.53e-24	16.9974	44.1519	3.72994	C3	complement component 3
202840_at	1.71e-22	5.55e-24	-16.9962	44.1486	-1.32093	TAF15	TATA-box binding protein associated factor 15
218712_at	1.78e-22	5.8e-24	-16.9805	44.1041	-2.32314	C1orf109	chromosome 1 open reading frame 109
201548_s_at	1.79e-22	5.82e-24	16.9795	44.1013	1.66242	KDM5B	lysine demethylase 5B
214982_at	1.83e-22	5.96e-24	16.9709	44.0769	2.09015	LOC101929240///SNRNP200	U5 small nuclear ribonucleoprotein 200 kDa helicase pseudogene///small nuclear ribonucleoprotein U5 subunit 200
200949_x_at	1.83e-22	5.99e-24	16.9695	44.0729	1.00006	SNORD54///RPS20	small nucleolar RNA, C/D box 54///ribosomal protein S20
206771_at	1.84e-22	6.02e-24	16.9674	44.0669	1.66934	UPK3A	uroplakin 3A
216171_at	1.93e-22	6.3e-24	16.9511	44.0208	1.49279
218213_s_at	1.93e-22	6.34e-24	16.9492	44.0155	1.50507	TMEM258	transmembrane protein 258
206203_at	1.98e-22	6.5e-24	-16.9403	43.9902	-1.06213	RCVRN	recoverin
213377_x_at	1.99e-22	6.56e-24	16.9371	43.9811	1.12532	RPS12	ribosomal protein S12
208641_s_at	2.02e-22	6.66e-24	16.9318	43.966	1.54239	RAC1	ras-related C3 botulinum toxin substrate 1 (rho family, small GTP binding protein Rac1)
206996_x_at	2.03e-22	6.71e-24	-16.929	43.9581	-1.47655	CACNB1	calcium voltage-gated channel auxiliary subunit beta 1
200714_x_at	2.11e-22	6.95e-24	16.9163	43.9221	1.1666	OS9	OS9, endoplasmic reticulum lectin
203222_s_at	2.12e-22	7e-24	-16.9137	43.9147	-2.12098	TLE1	transducin like enhancer of split 1
215836_s_at	2.18e-22	7.2e-24	16.9037	43.8862	1.4895	PCDHGA1///PCDHGA2///PCDHGA3///PCDHGA4///PCDHGA5///PCDHGA6///PCDHGA7///PCDHGA9///PCDHGA10///PCDHGA11///PCDHGB1///PCDHGB2///PCDHGB3///PCDHGB5///PCDHGB6///PCDHGB7///PCDHGC4///PCDHGC5///PCDHGA12///PCDHGA8///PCDHGB4///PCDHGC3	protocadherin gamma subfamily A, 1///protocadherin gamma subfamily A, 2///protocadherin gamma subfamily A, 3///protocadherin gamma subfamily A, 4///protocadherin gamma subfamily A, 5///protocadherin gamma subfamily A, 6///protocadherin gamma subfamily A, 7///protocadherin gamma subfamily A, 9///protocadherin gamma subfamily A, 10///protocadherin gamma subfamily A, 11///protocadherin gamma subfami…
210744_s_at	2.18e-22	7.23e-24	-16.9023	43.8822	-1.14078	IL5RA	interleukin 5 receptor subunit alpha
36920_at	2.31e-22	7.66e-24	-16.8821	43.825	-1.42481	MTM1	myotubularin 1
207591_s_at	2.36e-22	7.85e-24	-16.8735	43.8005	-1.2572	ARID1A	AT-rich interaction domain 1A
218602_s_at	2.39e-22	7.95e-24	-16.8689	43.7875	-1.77162	HAUS6	HAUS augmin like complex subunit 6
208421_at	2.42e-22	8.05e-24	-16.8642	43.774	-1.26558
220456_at	2.43e-22	8.11e-24	-16.8619	43.7674	-1.8809	SPTLC3	serine palmitoyltransferase long chain base subunit 3
47105_at	2.48e-22	8.29e-24	-16.8539	43.7448	-0.934621	DUS2	dihydrouridine synthase 2
205744_at	2.61e-22	8.72e-24	16.8361	43.694	1.62574	DOC2A	double C2 domain alpha
212109_at	2.63e-22	8.81e-24	16.8325	43.6838	0.951623	HN1L	hematological and neurological expressed 1 like
35846_at	2.66e-22	8.94e-24	-16.8273	43.6689	-1.35134	THRA	thyroid hormone receptor, alpha
211990_at	2.66e-22	8.95e-24	16.8268	43.6675	2.04972	HLA-DPA1	major histocompatibility complex, class II, DP alpha 1
209079_x_at	2.76e-22	9.3e-24	16.8135	43.6296	1.44479	PCDHGA1///PCDHGA2///PCDHGA3///PCDHGA4///PCDHGA5///PCDHGA6///PCDHGA7///PCDHGA9///PCDHGA10///PCDHGA11///PCDHGB1///PCDHGB2///PCDHGB3///PCDHGB5///PCDHGB6///PCDHGB7///PCDHGC4///PCDHGC5///PCDHGA12///PCDHGA8///PCDHGB4///PCDHGC3	protocadherin gamma subfamily A, 1///protocadherin gamma subfamily A, 2///protocadherin gamma subfamily A, 3///protocadherin gamma subfamily A, 4///protocadherin gamma subfamily A, 5///protocadherin gamma subfamily A, 6///protocadherin gamma subfamily A, 7///protocadherin gamma subfamily A, 9///protocadherin gamma subfamily A, 10///protocadherin gamma subfamily A, 11///protocadherin gamma subfami…
210173_at	2.77e-22	9.32e-24	-16.8124	43.6266	-1.23806	PTPRJ	protein tyrosine phosphatase, receptor type J
219185_at	2.77e-22	9.35e-24	-16.8115	43.6241	-1.7157	SIRT5	sirtuin 5
220108_at	2.77e-22	9.36e-24	-16.8112	43.6232	-1.55306	GNA14	G protein subunit alpha 14
200781_s_at	2.83e-22	9.56e-24	16.8036	43.6014	1.28413	RPS15A	ribosomal protein S15a
209970_x_at	2.92e-22	9.87e-24	16.7921	43.5688	1.25773	CASP1	caspase 1
215046_at	3.13e-22	1.06e-23	16.7666	43.4958	1.68752	KANSL1L	KAT8 regulatory NSL complex subunit 1 like
214853_s_at	3.19e-22	1.08e-23	16.7592	43.4748	1.97615	SHC1	SHC adaptor protein 1
208752_x_at	3.19e-22	1.09e-23	16.7588	43.4736	1.53115	NAP1L1	nucleosome assembly protein 1 like 1
211366_x_at	3.19e-22	1.09e-23	16.7587	43.4733	1.23595	CASP1	caspase 1
205019_s_at	3.23e-22	1.1e-23	16.7533	43.4579	1.28595	VIPR1	vasoactive intestinal peptide receptor 1
217490_at	3.25e-22	1.11e-23	16.7516	43.453	1.50238
203409_at	3.27e-22	1.12e-23	16.7479	43.4425	1.79007	DDB2	damage specific DNA binding protein 2
200088_x_at	3.42e-22	1.17e-23	16.732	43.397	1.15363	NBEAL1///RPL12	neurobeachin like 1///ribosomal protein L12
200715_x_at	3.5e-22	1.2e-23	16.7236	43.373	1.06533	SNORD32A///SNORD33///SNORD34///SNORD35A///RPL13A	small nucleolar RNA, C/D box 32A///small nucleolar RNA, C/D box 33///small nucleolar RNA, C/D box 34///small nucleolar RNA, C/D box 35A///ribosomal protein L13a
221441_at	3.55e-22	1.22e-23	16.7181	43.3574	1.7476	GSC2	goosecoid homeobox 2
209900_s_at	3.59e-22	1.23e-23	16.714	43.3456	3.4442	SLC16A1	solute carrier family 16 member 1
207087_x_at	3.59e-22	1.24e-23	-16.713	43.3426	-1.38782	ANK1	ankyrin 1
208626_s_at	3.59e-22	1.24e-23	16.7128	43.342	1.44584	VAT1	vesicle amine transport 1
212078_s_at	3.61e-22	1.25e-23	16.7102	43.3345	1.52994	KMT2A	lysine methyltransferase 2A
200663_at	3.68e-22	1.27e-23	16.7035	43.3154	1.39354	CD63	CD63 molecule
222218_s_at	3.71e-22	1.28e-23	16.7002	43.306	0.810027	PILRA	paired immunoglobin like type 2 receptor alpha
215091_s_at	3.81e-22	1.32e-23	16.6905	43.2781	1.70061	GTF3A	general transcription factor IIIA
205717_x_at	3.87e-22	1.34e-23	16.6844	43.2608	1.4481	PCDHGA1///PCDHGA2///PCDHGA3///PCDHGA4///PCDHGA5///PCDHGA6///PCDHGA7///PCDHGA9///PCDHGA10///PCDHGA11///PCDHGB1///PCDHGB2///PCDHGB3///PCDHGB5///PCDHGB6///PCDHGB7///PCDHGC4///PCDHGC5///PCDHGA12///PCDHGA8///PCDHGB4///PCDHGC3	protocadherin gamma subfamily A, 1///protocadherin gamma subfamily A, 2///protocadherin gamma subfamily A, 3///protocadherin gamma subfamily A, 4///protocadherin gamma subfamily A, 5///protocadherin gamma subfamily A, 6///protocadherin gamma subfamily A, 7///protocadherin gamma subfamily A, 9///protocadherin gamma subfamily A, 10///protocadherin gamma subfamily A, 11///protocadherin gamma subfami…
211914_x_at	3.97e-22	1.38e-23	16.6751	43.2341	1.36973	NF1P9///NF1	neurofibromin 1 pseudogene 9///neurofibromin 1
200819_s_at	4.05e-22	1.41e-23	16.6671	43.2113	1.27746	RPS15	ribosomal protein S15
216346_at	4.05e-22	1.41e-23	-16.6669	43.2106	-1.36927	SEC14L3	SEC14 like lipid binding 3
206427_s_at	4.08e-22	1.42e-23	16.6632	43.2001	1.22975	MLANA	melan-A
208819_at	4.08e-22	1.43e-23	16.663	43.1993	1.01883	RAB8A	RAB8A, member RAS oncogene family
220737_at	4.19e-22	1.46e-23	-16.6538	43.173	-1.62935	RPS6KA6	ribosomal protein S6 kinase A6
200031_s_at	4.2e-22	1.47e-23	16.6523	43.1687	1.00222	SNORD35B///RPS11	small nucleolar RNA, C/D box 35B///ribosomal protein S11
203686_at	4.23e-22	1.48e-23	16.6494	43.1605	1.17137	MPG	N-methylpurine DNA glycosylase
202029_x_at	4.34e-22	1.52e-23	16.6399	43.1332	1.12219	RPL38	ribosomal protein L38
205628_at	4.36e-22	1.53e-23	16.6378	43.127	1.83131	PRIM2	primase (DNA) subunit 2
31874_at	4.38e-22	1.54e-23	16.6354	43.1203	0.892878	GAS2L1	growth arrest specific 2 like 1
215006_at	4.54e-22	1.6e-23	16.623	43.0847	1.38124
212799_at	4.63e-22	1.63e-23	16.6154	43.0628	0.962692	STX6	syntaxin 6
206571_s_at	4.82e-22	1.7e-23	16.6007	43.0206	1.39617	MAP4K4	mitogen-activated protein kinase kinase kinase kinase 4
209191_at	4.82e-22	1.7e-23	16.6002	43.0192	2.06226	TUBB6	tubulin beta 6 class V
217213_at	4.91e-22	1.74e-23	-16.5937	43.0003	-2.1849	SLC6A2	solute carrier family 6 member 2
200975_at	4.91e-22	1.74e-23	16.5927	42.9974	1.42664	PPT1	palmitoyl-protein thioesterase 1
202889_x_at	4.91e-22	1.74e-23	-16.5923	42.9964	-1.85896	MAP7	microtubule associated protein 7
53968_at	5.06e-22	1.8e-23	16.5813	42.9647	0.77456	INTS5	integrator complex subunit 5
215452_x_at	5.08e-22	1.81e-23	16.58	42.961	1.67522	SUMO4	small ubiquitin-like modifier 4
212382_at	5.08e-22	1.81e-23	16.579	42.9582	2.28232	TCF4	transcription factor 4
208749_x_at	5.22e-22	1.86e-23	16.5696	42.9311	1.11381	FLOT1	flotillin 1
216967_at	5.23e-22	1.87e-23	-16.5679	42.9262	-1.49613	GAP43	growth associated protein 43
203415_at	5.3e-22	1.9e-23	16.5628	42.9116	2.24077	PDCD6	programmed cell death 6
214451_at	5.35e-22	1.91e-23	-16.5595	42.9019	-1.85464	TFAP2B	transcription factor AP-2 beta
215882_at	5.41e-22	1.94e-23	-16.5551	42.8892	-1.69539	CEP152	centrosomal protein 152
219009_at	5.42e-22	1.94e-23	-16.5541	42.8865	-1.1875	C14orf93	chromosome 14 open reading frame 93
215954_s_at	5.73e-22	2.06e-23	-16.5344	42.8296	-1.19836	CACTIN	cactin, spliceosome C complex subunit
215986_at	5.96e-22	2.14e-23	-16.5201	42.7884	-2.11636
207366_at	6.03e-22	2.17e-23	16.5154	42.7748	1.38252	KCNS1	potassium voltage-gated channel modifier subfamily S member 1
213932_x_at	6.22e-22	2.24e-23	16.504	42.7419	1.48185	HLA-A	major histocompatibility complex, class I, A
200032_s_at	6.38e-22	2.3e-23	16.4948	42.7154	0.777331	RPL9	ribosomal protein L9
201033_x_at	6.51e-22	2.35e-23	16.4876	42.6947	1.35861	RPLP0	ribosomal protein lateral stalk subunit P0
31845_at	6.52e-22	2.36e-23	16.4866	42.6917	1.5359	ELF4	E74 like ETS transcription factor 4
217678_at	6.54e-22	2.37e-23	16.4847	42.6864	2.12061	SLC7A11	solute carrier family 7 member 11
200829_x_at	6.6e-22	2.39e-23	16.4815	42.677	1.13652	ZNF207	zinc finger protein 207
219035_s_at	6.77e-22	2.46e-23	16.472	42.6496	1.02955	RNF34	ring finger protein 34
214080_x_at	6.93e-22	2.52e-23	16.4634	42.6247	1.10662	PRKCSH	protein kinase C substrate 80K-H
211587_x_at	6.94e-22	2.53e-23	16.4626	42.6225	1.32649	CHRNA3	cholinergic receptor nicotinic alpha 3 subunit
200076_s_at	6.97e-22	2.54e-23	16.4603	42.6159	1.24055	KXD1	KxDL motif containing 1
206064_s_at	6.99e-22	2.55e-23	16.4589	42.6119	1.42689	PPIL2	peptidylprolyl isomerase like 2
216436_at	7.03e-22	2.57e-23	-16.4569	42.6059	-1.76247	PIK3R4	phosphoinositide-3-kinase regulatory subunit 4
204455_at	7.21e-22	2.64e-23	-16.4474	42.5786	-1.82678	DST	dystonin
209166_s_at	7.21e-22	2.64e-23	16.447	42.5774	1.74936	MAN2B1	mannosidase alpha class 2B member 1
215097_at	7.22e-22	2.65e-23	-16.4461	42.5747	-1.11376	CAPZB	capping actin protein of muscle Z-line beta subunit
202705_at	7.26e-22	2.67e-23	16.444	42.5688	1.73123	CCNB2	cyclin B2
201954_at	7.48e-22	2.75e-23	16.433	42.5368	1.69515	ARPC1B	actin related protein 2/3 complex subunit 1B
210427_x_at	7.48e-22	2.75e-23	16.4327	42.5361	1.74312	ANXA2	annexin A2
218400_at	7.5e-22	2.76e-23	16.4314	42.5321	0.95393	OAS3	2'-5'-oligoadenylate synthetase 3
201177_s_at	7.59e-22	2.8e-23	16.4266	42.5183	1.19974	UBA2	ubiquitin like modifier activating enzyme 2
219710_at	8.16e-22	3.02e-23	-16.4012	42.4447	-1.37612	SH3TC2	SH3 domain and tetratricopeptide repeats 2
206248_at	8.19e-22	3.03e-23	-16.3993	42.4392	-0.906908	PRKCE	protein kinase C epsilon
221472_at	8.22e-22	3.05e-23	16.3977	42.4346	1.00315	SERINC3	serine incorporator 3
218153_at	8.4e-22	3.12e-23	16.3897	42.4114	1.60849	CARS2	cysteinyl-tRNA synthetase 2, mitochondrial (putative)
217589_at	8.42e-22	3.13e-23	-16.3885	42.408	-1.15054	RAB40A	RAB40A, member RAS oncogene family
213010_at	8.92e-22	3.32e-23	16.3681	42.3488	1.7881	PRKCDBP	protein kinase C delta binding protein
218595_s_at	9.06e-22	3.37e-23	16.3624	42.3321	0.962247	HEATR1	HEAT repeat containing 1
212004_at	9.08e-22	3.39e-23	16.3609	42.3279	0.739407	SZRD1	SUZ RNA binding domain containing 1
209124_at	9.09e-22	3.39e-23	16.3604	42.3264	0.722586	MYD88	myeloid differentiation primary response 88
213386_at	9.17e-22	3.43e-23	16.3566	42.3153	1.74232	TMEM246	transmembrane protein 246
214177_s_at	9.3e-22	3.48e-23	16.3516	42.3008	1.60807	PBXIP1	PBX homeobox interacting protein 1
210644_s_at	9.38e-22	3.51e-23	16.348	42.2904	1.19361	LAIR1	leukocyte associated immunoglobulin like receptor 1
208363_s_at	9.42e-22	3.53e-23	16.346	42.2847	1.21736	INPP4A	inositol polyphosphate-4-phosphatase type I A
204895_x_at	9.42e-22	3.54e-23	-16.3458	42.284	-1.03475	MUC4	mucin 4, cell surface associated
218130_at	9.98e-22	3.75e-23	16.3252	42.2242	1.59011	C17orf62	chromosome 17 open reading frame 62
218579_s_at	1e-21	3.77e-23	-16.3241	42.2208	-1.13808	DHX35	DEAH-box helicase 35
205969_at	1.02e-21	3.85e-23	16.3161	42.1977	0.843243	AADAC	arylacetamide deacetylase
207958_at	1.02e-21	3.86e-23	-16.3159	42.197	-1.7138	UGT2A2///UGT2A1	UDP glucuronosyltransferase family 2 member A2///UDP glucuronosyltransferase family 2 member A1 complex locus
215183_at	1.07e-21	4.03e-23	-16.3004	42.1522	-1.21283
210023_s_at	1.08e-21	4.1e-23	16.295	42.1364	0.90786	PCGF1	polycomb group ring finger 1
203423_at	1.09e-21	4.12e-23	16.293	42.1305	1.62847	RBP1	retinol binding protein 1
210601_at	1.1e-21	4.18e-23	16.2883	42.1169	1.48802	CDH6	cadherin 6
207583_at	1.13e-21	4.28e-23	16.2799	42.0924	1.81811	ABCD2	ATP binding cassette subfamily D member 2
216314_at	1.15e-21	4.38e-23	-16.2719	42.069	-2.6705	CRISP1	cysteine rich secretory protein 1
200087_s_at	1.25e-21	4.74e-23	16.2444	41.9889	1.27124	TMED2	transmembrane p24 trafficking protein 2
218627_at	1.26e-21	4.81e-23	16.2392	41.9736	1.5326	DRAM1	DNA damage regulated autophagy modulator 1
206274_s_at	1.29e-21	4.92e-23	-16.2313	41.9507	-1.19348	CROCC	ciliary rootlet coiled-coil, rootletin
210142_x_at	1.29e-21	4.94e-23	16.2302	41.9474	1.13291	FLOT1	flotillin 1
213399_x_at	1.32e-21	5.06e-23	16.2219	41.9231	1.39557	RPN2	ribophorin II
220618_s_at	1.32e-21	5.06e-23	-16.2218	41.9229	-1.01256	ZCWPW1	zinc finger CW-type and PWWP domain containing 1
205473_at	1.34e-21	5.12e-23	-16.2181	41.912	-2.03925	ATP6V1B1	ATPase H+ transporting V1 subunit B1
200926_at	1.36e-21	5.2e-23	16.2122	41.8949	0.864986	RPS23	ribosomal protein S23
203283_s_at	1.37e-21	5.26e-23	-16.2088	41.885	-1.84891	HS2ST1	heparan sulfate 2-O-sulfotransferase 1
201590_x_at	1.37e-21	5.28e-23	16.2075	41.8811	1.76392	ANXA2	annexin A2
219920_s_at	1.45e-21	5.58e-23	16.1879	41.824	1.00952	AMIGO3///GMPPB	adhesion molecule with Ig like domain 3///GDP-mannose pyrophosphorylase B
216023_at	1.46e-21	5.65e-23	-16.1842	41.8131	-1.14746	KDM4B	lysine demethylase 4B
216039_at	1.47e-21	5.67e-23	-16.1828	41.8091	-1.88846	GABRA2	gamma-aminobutyric acid type A receptor alpha2 subunit
210465_s_at	1.48e-21	5.72e-23	16.1797	41.8001	2.424	SNAPC3	small nuclear RNA activating complex polypeptide 3
214407_x_at	1.5e-21	5.81e-23	-16.1744	41.7843	-1.8618	GYPB	glycophorin B (MNS blood group)
220336_s_at	1.56e-21	6.03e-23	16.1617	41.7472	1.84621	GP6	glycoprotein VI platelet
220375_s_at	1.59e-21	6.15e-23	-16.1549	41.7273	-1.11962	C5orf66	chromosome 5 open reading frame 66
200644_at	1.61e-21	6.26e-23	16.1485	41.7086	1.74194	MARCKSL1	MARCKS like 1
201938_at	1.68e-21	6.52e-23	16.1345	41.6678	1.29295	CDK2AP1	cyclin dependent kinase 2 associated protein 1
207214_at	1.68e-21	6.55e-23	-16.1331	41.6637	-1.08228	SPINK4	serine peptidase inhibitor, Kazal type 4
201000_at	1.71e-21	6.65e-23	16.1279	41.6484	1.35658	AARS	alanyl-tRNA synthetase
204188_s_at	1.73e-21	6.73e-23	-16.1239	41.6365	-1.24524	RARG	retinoic acid receptor gamma
200005_at	1.75e-21	6.83e-23	16.1184	41.6206	1.26779	EIF3D	eukaryotic translation initiation factor 3 subunit D
211207_s_at	1.79e-21	6.99e-23	-16.1107	41.5979	-1.38655	ACSL6	acyl-CoA synthetase long-chain family member 6
200741_s_at	1.91e-21	7.46e-23	16.0885	41.5329	0.980195	RPS27	ribosomal protein S27
201268_at	1.94e-21	7.61e-23	16.0814	41.5121	1.43074	NME1-NME2///NME2	NME1-NME2 readthrough///NME/NM23 nucleoside diphosphate kinase 2
214839_at	2e-21	7.83e-23	-16.0719	41.4841	-1.49008	MIR124-1///LINC00599	microRNA 124-1///long intergenic non-protein coding RNA 599
204534_at	2e-21	7.85e-23	-16.0708	41.4808	-1.14346	SEBOX///VTN	SEBOX homeobox///vitronectin
208856_x_at	2.12e-21	8.33e-23	16.0506	41.4214	1.35961	RPLP0	ribosomal protein lateral stalk subunit P0
216492_at	2.16e-21	8.5e-23	-16.0434	41.4004	-0.844092	KIR3DX1	killer cell immunoglobulin like receptor, three Ig domains X1
201865_x_at	2.17e-21	8.53e-23	16.0424	41.3974	1.48968	NR3C1	nuclear receptor subfamily 3 group C member 1
200625_s_at	2.17e-21	8.55e-23	16.0416	41.395	1.31658	CAP1	adenylate cyclase associated protein 1
207254_at	2.17e-21	8.57e-23	-16.041	41.3932	-1.77033	SLC15A1	solute carrier family 15 member 1
214348_at	2.17e-21	8.57e-23	-16.0408	41.3928	-1.28281	TACR2	tachykinin receptor 2
200957_s_at	2.18e-21	8.61e-23	16.0392	41.388	1.0675	SSRP1	structure specific recognition protein 1
211945_s_at	2.25e-21	8.92e-23	16.027	41.3519	1.3203	ITGB1	integrin subunit beta 1
221567_at	2.28e-21	9.05e-23	16.0221	41.3377	2.48865	NOL3	nucleolar protein 3
43977_at	2.47e-21	9.79e-23	15.9951	41.2583	0.870405	TMEM161A	transmembrane protein 161A
215692_s_at	2.47e-21	9.82e-23	-15.9943	41.2557	-1.40387	MPPED2	metallophosphoesterase domain containing 2
213954_at	2.48e-21	9.87e-23	-15.9925	41.2505	-2.82093	FAM169A	family with sequence similarity 169 member A
201046_s_at	2.53e-21	1.01e-22	15.9852	41.2291	0.915076	RAD23A	RAD23 homolog A, nucleotide excision repair protein
208312_s_at	2.59e-21	1.03e-22	-15.9766	41.2037	-1.19529	PRAMEF2///PRAMEF1	PRAME family member 2///PRAME family member 1
213569_at	2.6e-21	1.04e-22	-15.9756	41.2008	-1.29529	LOC100506603	uncharacterized LOC100506603
32029_at	2.69e-21	1.07e-22	15.9634	41.1648	1.11285	LOC101060747///PDPK1	3-phosphoinositide-dependent protein kinase 1-like///3-phosphoinositide dependent protein kinase 1
215309_at	2.69e-21	1.08e-22	15.9631	41.1639	3.52358	ZNF674	zinc finger protein 674
203890_s_at	2.69e-21	1.08e-22	15.9619	41.1604	2.34336	MIR637///DAPK3	microRNA 637///death associated protein kinase 3
204319_s_at	2.71e-21	1.09e-22	15.9599	41.1545	1.91315	RGS10	regulator of G-protein signaling 10
217995_at	2.75e-21	1.1e-22	15.9544	41.1382	1.52804	SQRDL	sulfide quinone reductase-like (yeast)
203505_at	2.8e-21	1.12e-22	15.9481	41.1196	1.51752	ABCA1	ATP binding cassette subfamily A member 1
222297_x_at	2.84e-21	1.14e-22	15.9425	41.1032	1.19023	RPL18	ribosomal protein L18
37226_at	2.85e-21	1.15e-22	-15.9404	41.0969	-1.0972	BNIP1	BCL2 interacting protein 1
217938_s_at	2.92e-21	1.18e-22	15.9319	41.0716	1.08608	KCMF1	potassium channel modulatory factor 1
215914_at	2.93e-21	1.18e-22	15.9309	41.0688	1.04329
201313_at	3e-21	1.21e-22	15.9223	41.0433	3.14148	ENO2	enolase 2
208142_at	3.02e-21	1.22e-22	15.9199	41.0362	1.51105	EDDM3A	epididymal protein 3A
40420_at	3.05e-21	1.23e-22	15.9163	41.0255	1.04484	STK10	serine/threonine kinase 10
220496_at	3.11e-21	1.26e-22	15.9087	41.0033	1.07618	CLEC1B	C-type lectin domain family 1 member B
200610_s_at	3.18e-21	1.29e-22	15.9013	40.9813	1.05048	NCL	nucleolin
216947_at	3.27e-21	1.33e-22	-15.8909	40.9506	-1.67162	DES	desmin
212578_x_at	3.33e-21	1.35e-22	15.8847	40.9321	0.9014	RPS17	ribosomal protein S17
200632_s_at	3.34e-21	1.36e-22	15.8832	40.9277	1.71546	NDRG1	N-myc downstream regulated 1
204751_x_at	3.34e-21	1.36e-22	15.883	40.9272	1.97445	DSC2	desmocollin 2
216601_at	3.39e-21	1.38e-22	15.8775	40.9109	0.955067	AOC4P	amine oxidase, copper containing 4, pseudogene
201405_s_at	3.44e-21	1.41e-22	15.872	40.8947	1.20658	COPS6	COP9 signalosome subunit 6
202990_at	3.55e-21	1.45e-22	15.8605	40.8606	1.20929	PYGL	phosphorylase, glycogen, liver
204504_s_at	3.63e-21	1.49e-22	15.8525	40.8367	0.957206	HIRIP3	HIRA interacting protein 3
202510_s_at	3.65e-21	1.5e-22	15.8502	40.8301	1.60447	TNFAIP2	TNF alpha induced protein 2
210439_at	3.77e-21	1.55e-22	15.8392	40.7975	1.72065	ICOS	inducible T-cell costimulator
214756_x_at	4.11e-21	1.69e-22	15.8094	40.709	1.42631	PMS2P1	PMS1 homolog 2, mismatch repair system component pseudogene 1
201160_s_at	4.14e-21	1.7e-22	15.8065	40.7004	1.72747	YBX3	Y-box binding protein 3
218894_s_at	4.17e-21	1.72e-22	-15.8035	40.6915	-1.41034	MAGOHB	mago homolog B, exon junction complex core component
200763_s_at	4.23e-21	1.74e-22	15.7984	40.6765	1.10979	RPLP1	ribosomal protein lateral stalk subunit P1
209342_s_at	4.29e-21	1.77e-22	-15.7933	40.6613	-1.11386	IKBKB	inhibitor of kappa light polypeptide gene enhancer in B-cells, kinase beta
220824_at	4.29e-21	1.77e-22	-15.7928	40.6598	-1.13759
208713_at	4.42e-21	1.83e-22	15.7828	40.6299	0.910846	HNRNPUL1	heterogeneous nuclear ribonucleoprotein U like 1
215892_at	4.49e-21	1.86e-22	-15.777	40.6127	-1.79267	ZNF440	zinc finger protein 440
203431_s_at	4.54e-21	1.88e-22	-15.7727	40.5999	-1.12123	ARHGAP32	Rho GTPase activating protein 32
213749_at	4.6e-21	1.91e-22	15.7679	40.5857	1.78677	MASP1	mannan binding lectin serine peptidase 1
64899_at	4.67e-21	1.94e-22	15.7623	40.5691	1.35756	PLPPR2	phospholipid phosphatase related 2
206316_s_at	4.82e-21	2e-22	-15.7516	40.5374	-1.23677	KNTC1	kinetochore associated 1
212289_at	4.82e-21	2e-22	15.7514	40.5367	1.19014	ANKRD12	ankyrin repeat domain 12
208636_at	4.88e-21	2.03e-22	15.7465	40.5221	2.07145	ACTN1	actinin alpha 1
214317_x_at	4.94e-21	2.06e-22	15.742	40.5087	1.44058	RPS9	ribosomal protein S9
210331_at	4.95e-21	2.07e-22	-15.741	40.5058	-1.27824	HECW1	HECT, C2 and WW domain containing E3 ubiquitin protein ligase 1
216442_x_at	4.99e-21	2.09e-22	15.7378	40.4963	2.65903	FN1	fibronectin 1
201126_s_at	5.04e-21	2.11e-22	15.7342	40.4855	1.20163	MGAT1	mannosyl (alpha-1,3-)-glycoprotein beta-1,2-N-acetylglucosaminyltransferase
216740_at	5.05e-21	2.12e-22	15.7331	40.4823	2.04535
53720_at	5.09e-21	2.13e-22	15.7303	40.474	1.0681	C19orf66	chromosome 19 open reading frame 66
202619_s_at	5.19e-21	2.18e-22	15.7232	40.4528	3.15981	PLOD2	procollagen-lysine,2-oxoglutarate 5-dioxygenase 2
213011_s_at	5.27e-21	2.22e-22	15.7176	40.4361	1.52546	TPI1	triosephosphate isomerase 1
207932_at	5.29e-21	2.23e-22	-15.7158	40.4307	-1.72512	IFNA8	interferon alpha 8
46665_at	5.42e-21	2.28e-22	15.7076	40.4062	0.97747	SEMA4C	semaphorin 4C
212347_x_at	5.42e-21	2.29e-22	15.7071	40.4049	0.951864	MIR4800///MXD4	microRNA 4800///MAX dimerization protein 4
206642_at	5.42e-21	2.29e-22	-15.7065	40.403	-1.62343	DSG1	desmoglein 1
215019_x_at	5.5e-21	2.32e-22	15.7013	40.3876	1.66204	ZNF528	zinc finger protein 528
208280_at	5.85e-21	2.47e-22	-15.6803	40.3248	-1.07586	CDRT1	CMT1A duplicated region transcript 1
201073_s_at	6.02e-21	2.55e-22	-15.6703	40.2949	-1.36549	SMARCC1	SWI/SNF related, matrix associated, actin dependent regulator of chromatin subfamily c member 1
217983_s_at	6.11e-21	2.59e-22	15.6647	40.2782	3.68961	RNASET2	ribonuclease T2
201665_x_at	6.28e-21	2.66e-22	15.6552	40.2501	1.02895	RPS17	ribosomal protein S17
632_at	6.34e-21	2.69e-22	15.6518	40.2397	1.2089	GSK3A	glycogen synthase kinase 3 alpha
206052_s_at	6.36e-21	2.7e-22	15.6502	40.2351	0.82591	SLBP	stem-loop binding protein
200783_s_at	6.38e-21	2.72e-22	-15.6487	40.2305	-1.66783	STMN1	stathmin 1
217485_x_at	6.47e-21	2.76e-22	15.6439	40.2161	1.38423	PMS2P1	PMS1 homolog 2, mismatch repair system component pseudogene 1
215290_at	6.51e-21	2.78e-22	-15.6415	40.2089	-1.93158
216280_s_at	6.53e-21	2.79e-22	-15.6401	40.2048	-1.84202	DICER1	dicer 1, ribonuclease III
200023_s_at	6.62e-21	2.83e-22	15.6348	40.189	1.26944	EIF3F	eukaryotic translation initiation factor 3 subunit F
200705_s_at	6.66e-21	2.85e-22	15.6325	40.1821	1.44454	SNORA41///EEF1B2	small nucleolar RNA, H/ACA box 41///eukaryotic translation elongation factor 1 beta 2
211674_x_at	6.75e-21	2.89e-22	-15.6275	40.1671	-1.45809	CTAG1A///CTAG1B	cancer/testis antigen 1A///cancer/testis antigen 1B
219325_s_at	6.84e-21	2.94e-22	15.6226	40.1525	1.72274	ELAC1	elaC ribonuclease Z 1
204900_x_at	6.99e-21	3e-22	15.6153	40.1308	2.61031	SAP30	Sin3A associated protein 30
217854_s_at	6.99e-21	3e-22	15.615	40.1299	1.27606	POLR2E	RNA polymerase II subunit E
207196_s_at	7.31e-21	3.15e-22	15.5992	40.0825	1.70597	TNIP1	TNFAIP3 interacting protein 1
201002_s_at	7.34e-21	3.16e-22	15.5979	40.0785	1.01153	TMEM189-UBE2V1///TMEM189///UBE2V2///UBE2V1	TMEM189-UBE2V1 readthrough///transmembrane protein 189///ubiquitin conjugating enzyme E2 V2///ubiquitin conjugating enzyme E2 V1
212464_s_at	7.42e-21	3.2e-22	15.5936	40.0659	2.70137	FN1	fibronectin 1
213458_at	7.43e-21	3.21e-22	15.5929	40.0636	1.65432	FAM149B1	family with sequence similarity 149 member B1
211330_s_at	7.58e-21	3.27e-22	-15.5859	40.0427	-1.40154	HFE	hemochromatosis
217899_at	7.79e-21	3.37e-22	15.5763	40.0138	1.08499	TMEM214	transmembrane protein 214
220906_at	7.84e-21	3.4e-22	-15.5736	40.0059	-1.27353
202625_at	7.95e-21	3.45e-22	15.5686	39.9909	1.92352	LYN	LYN proto-oncogene, Src family tyrosine kinase
212046_x_at	7.95e-21	3.45e-22	15.5682	39.9897	1.18343	MAPK3	mitogen-activated protein kinase 3
212314_at	7.95e-21	3.45e-22	15.568	39.9892	2.24341	SEL1L3	SEL1L family member 3
204214_s_at	7.95e-21	3.46e-22	15.5673	39.987	1.14847	RAB32	RAB32, member RAS oncogene family
220767_at	7.95e-21	3.46e-22	-15.5672	39.9866	-1.44422
211123_at	7.97e-21	3.47e-22	-15.5663	39.9838	-1.11425	SLC5A5	solute carrier family 5 member 5
212555_at	8.02e-21	3.5e-22	-15.5638	39.9763	-0.971961	PRKAR1B	protein kinase cAMP-dependent type I regulatory subunit beta
202185_at	8.1e-21	3.54e-22	15.5599	39.9647	1.60042	PLOD3	procollagen-lysine,2-oxoglutarate 5-dioxygenase 3
200709_at	8.17e-21	3.57e-22	15.5566	39.9548	1.3956	LOC101929368///FKBP1A	uncharacterized LOC101929368///FK506 binding protein 1A
200762_at	8.27e-21	3.62e-22	15.5522	39.9417	1.61294	DPYSL2	dihydropyrimidinase like 2
210953_at	8.41e-21	3.68e-22	15.5464	39.9241	1.86697	TSC22D2	TSC22 domain family member 2
207331_at	8.48e-21	3.72e-22	-15.5434	39.9153	-2.47594	CENPF	centromere protein F
217750_s_at	8.68e-21	3.81e-22	15.535	39.8902	1.13369	UBE2Z	ubiquitin conjugating enzyme E2 Z
208616_s_at	8.73e-21	3.83e-22	15.533	39.8839	1.36041	PTP4A2	protein tyrosine phosphatase type IVA, member 2
201342_at	8.81e-21	3.87e-22	15.5293	39.873	0.891467	SNRPC	small nuclear ribonucleoprotein polypeptide C
209602_s_at	8.88e-21	3.91e-22	-15.5266	39.8648	-1.93907	GATA3	GATA binding protein 3
212658_at	8.89e-21	3.92e-22	15.5255	39.8615	2.11261	LHFPL2	lipoma HMGIC fusion partner-like 2
207750_at	9.16e-21	4.04e-22	15.5152	39.8307	3.16999
204227_s_at	9.42e-21	4.16e-22	15.5054	39.8013	0.879329	TK2	thymidine kinase 2, mitochondrial
215472_at	9.43e-21	4.17e-22	-15.5048	39.7994	-1.42563	PACRG	PARK2 coregulated
216963_s_at	9.46e-21	4.18e-22	15.5036	39.7959	1.11788	GAP43	growth associated protein 43
209223_at	9.55e-21	4.23e-22	-15.5	39.7851	-1.48757	NDUFA2	NADH:ubiquinone oxidoreductase subunit A2
209171_at	9.95e-21	4.41e-22	15.486	39.7428	0.929554	ITPA	inosine triphosphatase
200026_at	1.02e-20	4.52e-22	15.4777	39.7179	0.737895	RPL34	ribosomal protein L34
208187_s_at	1.02e-20	4.56e-22	15.475	39.7097	1.34423
201751_at	1.02e-20	4.56e-22	15.4749	39.7095	0.871702	JOSD1	Josephin domain containing 1
200012_x_at	1.03e-20	4.56e-22	15.4745	39.7084	0.882739	RPL21P28///SNORA27///SNORD102///RPL21	ribosomal protein L21 pseudogene 28///small nucleolar RNA, H/ACA box 27///small nucleolar RNA, C/D box 102///ribosomal protein L21
204115_at	1.07e-20	4.78e-22	15.459	39.6615	1.7283	GNG11	G protein subunit gamma 11
220797_at	1.09e-20	4.84e-22	-15.4545	39.648	-1.4307	LOC284009///METTL16	uncharacterized LOC284009///methyltransferase like 16
216151_at	1.09e-20	4.85e-22	-15.4541	39.6468	-1.89149
218606_at	1.09e-20	4.88e-22	15.4522	39.6413	0.828337	ZDHHC7	zinc finger DHHC-type containing 7
220697_at	1.09e-20	4.88e-22	-15.4521	39.6407	-1.69727
204676_at	1.11e-20	4.97e-22	15.4458	39.622	0.909446	TMEM186	transmembrane protein 186
200002_at	1.13e-20	5.05e-22	15.4408	39.607	1.12816	RPL35	ribosomal protein L35
210139_s_at	1.13e-20	5.06e-22	15.4399	39.6041	1.41518	PMP22	peripheral myelin protein 22
36084_at	1.16e-20	5.2e-22	-15.4306	39.5761	-0.977062	CUL7	cullin 7
210495_x_at	1.16e-20	5.21e-22	15.4299	39.5741	2.64029	FN1	fibronectin 1
208668_x_at	1.16e-20	5.24e-22	15.4281	39.5687	0.985065	HMGN2	high mobility group nucleosomal binding domain 2
221009_s_at	1.18e-20	5.31e-22	15.4235	39.5548	3.67838	ANGPTL4	angiopoietin like 4
201649_at	1.18e-20	5.33e-22	15.4225	39.5517	1.80029	UBE2L6	ubiquitin conjugating enzyme E2 L6
221864_at	1.18e-20	5.33e-22	15.4224	39.5515	1.31084	ORAI3	ORAI calcium release-activated calcium modulator 3
217764_s_at	1.21e-20	5.46e-22	15.4146	39.5278	1.71431	RAB31	RAB31, member RAS oncogene family
202153_s_at	1.22e-20	5.51e-22	15.4117	39.519	1.53161	NUP62	nucleoporin 62
211609_x_at	1.22e-20	5.51e-22	15.4115	39.5186	1.19484	PSMD4	proteasome 26S subunit, non-ATPase 4
220455_at	1.24e-20	5.64e-22	15.4039	39.4954	1.03419	SLC16A8	solute carrier family 16 member 8
204336_s_at	1.25e-20	5.68e-22	15.4015	39.4884	0.945456	RGS19	regulator of G-protein signaling 19
216565_x_at	1.25e-20	5.68e-22	-15.4014	39.488	-1.85046
208203_x_at	1.29e-20	5.88e-22	-15.3897	39.4528	-1.42267	KIR2DS5	killer cell immunoglobulin like receptor, two Ig domains and short cytoplasmic tail 5
211459_at	1.31e-20	5.96e-22	15.3855	39.44	1.82239
217884_at	1.35e-20	6.16e-22	15.3744	39.4066	0.934991	NAT10	N-acetyltransferase 10
218672_at	1.43e-20	6.54e-22	15.3543	39.3458	0.740057	TNFAIP8L2-SCNM1///SCNM1	TNFAIP8L2-SCNM1 readthrough///sodium channel modifier 1
211340_s_at	1.53e-20	6.99e-22	15.3322	39.279	2.35485	MIR6756///MCAM	microRNA 6756///melanoma cell adhesion molecule
207114_at	1.56e-20	7.13e-22	15.3255	39.2587	1.01923	LY6G6C	lymphocyte antigen 6 complex, locus G6C
45297_at	1.59e-20	7.29e-22	15.3183	39.2369	1.95554	EHD2	EH domain containing 2
218335_x_at	1.65e-20	7.54e-22	15.3071	39.2029	1.1766	TNIP2	TNFAIP3 interacting protein 2
221840_at	1.65e-20	7.58e-22	15.3054	39.1977	1.31729	PTPRE	protein tyrosine phosphatase, receptor type E
213521_at	1.66e-20	7.6e-22	15.3042	39.1941	0.85372	PTPN18	protein tyrosine phosphatase, non-receptor type 18
201746_at	1.67e-20	7.64e-22	15.3024	39.1887	1.69109	TP53	tumor protein p53
211719_x_at	1.72e-20	7.9e-22	15.2914	39.1553	2.68297	FN1	fibronectin 1
202495_at	1.73e-20	7.93e-22	-15.29	39.151	-1.35142	TBCC	tubulin folding cofactor C
221471_at	1.73e-20	7.96e-22	15.289	39.1482	0.960078	SERINC3	serine incorporator 3
221098_x_at	1.74e-20	8.02e-22	15.2863	39.1398	4.18396	UTP14A	UTP14A small subunit processome component
214930_at	1.79e-20	8.27e-22	15.2761	39.1091	1.3447	SLITRK5	SLIT and NTRK like family member 5
215979_s_at	1.85e-20	8.54e-22	-15.2654	39.0767	-1.19356	SLC7A1	solute carrier family 7 member 1
207234_at	1.88e-20	8.68e-22	-15.2601	39.0605	-1.42087	RFX3	regulatory factor X3
200872_at	1.91e-20	8.81e-22	15.255	39.0451	1.62642	S100A10	S100 calcium binding protein A10
200963_x_at	1.91e-20	8.85e-22	15.2536	39.0409	0.859841	RPL31	ribosomal protein L31
213699_s_at	1.91e-20	8.87e-22	15.2528	39.0384	1.285	YWHAQ	tyrosine 3-monooxygenase/tryptophan 5-monooxygenase activation protein theta
200779_at	1.92e-20	8.91e-22	15.2516	39.0346	1.29965	ATF4	activating transcription factor 4
219366_at	1.92e-20	8.93e-22	15.2507	39.032	1.269	AVEN	apoptosis and caspase activation inhibitor
203912_s_at	1.93e-20	8.98e-22	15.249	39.0267	0.843668	DNASE1L1	deoxyribonuclease 1 like 1
206011_at	1.97e-20	9.16e-22	15.2421	39.0059	1.22095	CASP1	caspase 1
215313_x_at	1.98e-20	9.21e-22	15.2403	39.0004	1.56852	HLA-A	major histocompatibility complex, class I, A
200079_s_at	2e-20	9.31e-22	15.237	38.9905	1.10247	KARS	lysyl-tRNA synthetase
201722_s_at	2.3e-20	1.07e-21	15.1897	38.8464	1.41147	GALNT1	polypeptide N-acetylgalactosaminyltransferase 1
211487_x_at	2.36e-20	1.1e-21	15.181	38.8202	0.922456	RPS17	ribosomal protein S17
216097_at	2.46e-20	1.15e-21	-15.1675	38.7788	-2.55605
213151_s_at	2.49e-20	1.17e-21	15.1621	38.7625	1.15788	2024-09-07	septin 7
218149_s_at	2.57e-20	1.2e-21	15.1516	38.7306	2.57195	ZNF395	zinc finger protein 395
220155_s_at	2.6e-20	1.22e-21	15.148	38.7195	0.916414	BRD9	bromodomain containing 9
207775_at	2.65e-20	1.24e-21	15.1411	38.6985	2.15112	MGC4859	uncharacterized LOC79150
200834_s_at	2.72e-20	1.28e-21	15.1322	38.6713	1.18131	RPS21	ribosomal protein S21
221597_s_at	2.76e-20	1.3e-21	15.1273	38.6563	0.958835	TMEM208	transmembrane protein 208
212796_s_at	2.77e-20	1.31e-21	15.1251	38.6498	1.16945	TBC1D2B	TBC1 domain family member 2B
215055_at	2.78e-20	1.31e-21	-15.1234	38.6444	-1.06216	B3GNTL1	UDP-GlcNAc:betaGal beta-1,3-N-acetylglucosaminyltransferase-like 1
203278_s_at	2.8e-20	1.32e-21	15.1217	38.6392	1.3463	PHF21A	PHD finger protein 21A
214452_at	2.85e-20	1.34e-21	15.1156	38.6205	1.82725	BCAT1	branched chain amino acid transaminase 1
210125_s_at	3.04e-20	1.44e-21	15.0938	38.5539	1.17257	BANF1	barrier to autointegration factor 1
218043_s_at	3.09e-20	1.46e-21	-15.0877	38.5354	-1.28062	AZI2	5-azacytidine induced 2
202846_s_at	3.15e-20	1.49e-21	15.0816	38.5167	0.880082	PIGC	phosphatidylinositol glycan anchor biosynthesis class C
211217_s_at	3.16e-20	1.5e-21	15.0801	38.5123	1.21261	KCNQ1	potassium voltage-gated channel subfamily Q member 1
217206_at	3.19e-20	1.51e-21	15.0765	38.5011	1.9591
221581_s_at	3.19e-20	1.52e-21	15.0757	38.4987	0.832996	LAT2	linker for activation of T-cells family member 2
204416_x_at	3.19e-20	1.52e-21	15.0753	38.4977	2.85505	APOC1	apolipoprotein C1
208376_at	3.22e-20	1.53e-21	-15.0723	38.4884	-1.12505	CCR4	C-C motif chemokine receptor 4
210022_at	3.36e-20	1.6e-21	15.058	38.4448	0.75926	PCGF1	polycomb group ring finger 1
216016_at	3.45e-20	1.64e-21	-15.0493	38.4182	-1.15976	NLRP3	NLR family pyrin domain containing 3
202307_s_at	3.52e-20	1.68e-21	15.0422	38.3961	2.46546	TAP1	transporter 1, ATP binding cassette subfamily B member
216575_at	3.52e-20	1.68e-21	15.0418	38.3952	1.49367
213911_s_at	3.54e-20	1.69e-21	15.0396	38.3883	1.40672	H2AFZ	H2A histone family member Z
213066_at	3.61e-20	1.73e-21	-15.033	38.368	-1.23349	RUSC2	RUN and SH3 domain containing 2
201140_s_at	3.64e-20	1.74e-21	15.0298	38.3583	2.06435	RAB5C	RAB5C, member RAS oncogene family
211628_x_at	3.65e-20	1.75e-21	15.0291	38.3561	0.973247	FTH1P5	ferritin heavy chain 1 pseudogene 5
205469_s_at	3.77e-20	1.81e-21	15.0179	38.3219	1.52328	IRF5	interferon regulatory factor 5
207062_at	3.97e-20	1.91e-21	-15.0001	38.2674	-1.22249	IAPP	islet amyloid polypeptide
201389_at	4.02e-20	1.93e-21	14.9963	38.2557	1.5647	ITGA5	integrin subunit alpha 5
217279_x_at	4.04e-20	1.94e-21	-14.9941	38.2487	-1.29279	MMP14	matrix metallopeptidase 14
202345_s_at	4.06e-20	1.95e-21	14.9924	38.2436	3.01838	FABP5	fatty acid binding protein 5
200044_at	4.06e-20	1.96e-21	14.9918	38.2417	1.25465	GATC///SRSF9	glutamyl-tRNA amidotransferase subunit C///serine and arginine rich splicing factor 9
211940_x_at	4.07e-20	1.96e-21	14.9905	38.2379	1.04085	H3F3AP4///H3F3B///H3F3A	H3 histone, family 3A, pseudogene 4///H3 histone, family 3B///H3 histone, family 3A
200826_at	4.1e-20	1.98e-21	14.9879	38.2298	1.3747	SNRPD2	small nuclear ribonucleoprotein D2 polypeptide
202013_s_at	4.18e-20	2.02e-21	14.9815	38.2102	0.81634	EXT2	exostosin glycosyltransferase 2
200623_s_at	4.2e-20	2.03e-21	14.9791	38.2029	1.36278	CALM3///CALM2///CALM1	calmodulin 3///calmodulin 2///calmodulin 1
203332_s_at	4.26e-20	2.06e-21	14.9746	38.1891	1.48099	INPP5D	inositol polyphosphate-5-phosphatase D
219332_at	4.27e-20	2.07e-21	14.9735	38.1855	2.04395	MICALL2	MICAL like 2
218248_at	4.27e-20	2.07e-21	14.973	38.1843	1.11941	FAM111A	family with sequence similarity 111 member A
214680_at	4.32e-20	2.1e-21	-14.9688	38.1711	-1.3952	NTRK2	neurotrophic receptor tyrosine kinase 2
220248_x_at	4.35e-20	2.12e-21	14.9662	38.1631	0.948932	NSFL1C	NSFL1 cofactor
201528_at	4.35e-20	2.12e-21	14.9661	38.1628	1.42963	RPA1	replication protein A1
206483_at	4.52e-20	2.2e-21	-14.9532	38.1232	-1.22497	LRRC6	leucine rich repeat containing 6
208755_x_at	4.58e-20	2.23e-21	14.9489	38.1102	0.827623	H3F3AP4///H3F3B///H3F3A	H3 histone, family 3A, pseudogene 4///H3 histone, family 3B///H3 histone, family 3A
214246_x_at	4.58e-20	2.23e-21	14.9487	38.1095	1.00993	MINK1	misshapen like kinase 1
201250_s_at	4.63e-20	2.26e-21	14.9444	38.0963	1.9407	SLC2A1	solute carrier family 2 member 1
211714_x_at	4.65e-20	2.27e-21	14.9427	38.0911	1.73557	TUBB	tubulin beta class I
209115_at	4.66e-20	2.28e-21	14.9415	38.0872	1.68592	UBA3	ubiquitin like modifier activating enzyme 3
217632_at	4.85e-20	2.37e-21	14.9284	38.047	1.71409	GNL3L	G protein nucleolar 3 like
208674_x_at	4.88e-20	2.39e-21	14.9263	38.0407	1.22532	DDOST	dolichyl-diphosphooligosaccharide--protein glycosyltransferase non-catalytic subunit
37012_at	4.91e-20	2.41e-21	14.924	38.0335	1.21302	CAPZB	capping actin protein of muscle Z-line beta subunit
200990_at	4.93e-20	2.42e-21	14.9222	38.0279	0.93923	TRIM28	tripartite motif containing 28
201715_s_at	5.03e-20	2.47e-21	14.9154	38.007	1.40218	ACIN1	apoptotic chromatin condensation inducer 1
208247_at	5.14e-20	2.53e-21	14.9075	37.9828	1.3335	ERC2-IT1	ERC2 intronic transcript 1
203025_at	5.14e-20	2.53e-21	14.9073	37.9821	0.797925	NAA10	N(alpha)-acetyltransferase 10, NatA catalytic subunit
219123_at	5.27e-20	2.6e-21	-14.8993	37.9574	-1.15055	ZNF232	zinc finger protein 232
200089_s_at	5.39e-20	2.66e-21	14.8913	37.9329	0.980425	SNORD18C///SNORD18B///SNORD18A///SNORD16///RPL4	small nucleolar RNA, C/D box 18C///small nucleolar RNA, C/D box 18B///small nucleolar RNA, C/D box 18A///small nucleolar RNA, C/D box 16///ribosomal protein L4
203530_s_at	5.41e-20	2.67e-21	14.8897	37.9281	1.66711	STX4	syntaxin 4
221676_s_at	5.42e-20	2.68e-21	14.8889	37.9254	1.65859	CORO1C	coronin 1C
201114_x_at	5.46e-20	2.7e-21	14.8861	37.9168	1.31078	PSMA7	proteasome subunit alpha 7
213857_s_at	5.47e-20	2.71e-21	14.8857	37.9156	1.74316	CD47	CD47 molecule
205009_at	5.5e-20	2.73e-21	-14.8833	37.9081	-1.90714	TFF1	trefoil factor 1
221253_s_at	5.5e-20	2.73e-21	14.8831	37.9075	1.51901	BLOC1S5-TXNDC5///TXNDC5	BLOC1S5-TXNDC5 readthrough (NMD candidate)///thioredoxin domain containing 5
208395_s_at	5.61e-20	2.79e-21	-14.876	37.8858	-1.16447	URB1	URB1 ribosome biogenesis 1 homolog (S. cerevisiae)
219888_at	5.66e-20	2.81e-21	14.8734	37.8776	2.0431	SPAG4	sperm associated antigen 4
203461_at	5.68e-20	2.82e-21	14.8717	37.8724	1.41707	CHD2	chromodomain helicase DNA binding protein 2
209251_x_at	5.79e-20	2.88e-21	14.8649	37.8516	1.68113	TUBA1C	tubulin alpha 1c
214173_x_at	5.82e-20	2.9e-21	14.8631	37.8458	0.845631	URI1	URI1, prefoldin like chaperone
202035_s_at	5.83e-20	2.91e-21	-14.8623	37.8434	-2.13031	SFRP1	secreted frizzled related protein 1
207369_at	5.91e-20	2.95e-21	14.8575	37.8286	1.59926	BRS3	bombesin receptor subtype 3
208339_at	5.96e-20	2.98e-21	-14.8543	37.8188	-1.15309	XKRY2///XKRY	XK related, Y-linked 2///XK related, Y-linked
219532_at	6.01e-20	3e-21	-14.8514	37.81	-2.03787	ELOVL4	ELOVL fatty acid elongase 4
207012_at	6.11e-20	3.06e-21	-14.8456	37.792	-1.15896	MMP16	matrix metallopeptidase 16
208018_s_at	6.11e-20	3.06e-21	14.8453	37.7911	1.36148	HCK	HCK proto-oncogene, Src family tyrosine kinase
221707_s_at	6.19e-20	3.1e-21	-14.8412	37.7783	-1.14576	VPS53	VPS53, GARP complex subunit
212519_at	6.45e-20	3.23e-21	14.8274	37.7357	1.14218	UBE2E1	ubiquitin conjugating enzyme E2 E1
202214_s_at	6.68e-20	3.36e-21	14.8153	37.6986	1.07754	CUL4B	cullin 4B
207324_s_at	6.8e-20	3.42e-21	-14.8094	37.6802	-1.23747	DSC1	desmocollin 1
216729_at	6.94e-20	3.49e-21	-14.8025	37.6587	-1.08412
213828_x_at	7.13e-20	3.59e-21	14.7934	37.6306	0.834163	H3F3AP4///H3F3B///H3F3A	H3 histone, family 3A, pseudogene 4///H3 histone, family 3B///H3 histone, family 3A
207318_s_at	7.39e-20	3.72e-21	14.7814	37.5935	1.12673	CDK13	cyclin dependent kinase 13
43511_s_at	7.43e-20	3.75e-21	14.7794	37.5874	0.872341	ARRB1	arrestin beta 1
216705_s_at	7.62e-20	3.85e-21	14.7708	37.5608	0.929572	ADA	adenosine deaminase
211840_s_at	7.76e-20	3.92e-21	-14.7645	37.5415	-1.39075	PDE4D	phosphodiesterase 4D
203106_s_at	7.93e-20	4.01e-21	-14.7571	37.5185	-1.59707	VPS41	VPS41, HOPS complex subunit
211983_x_at	8.15e-20	4.13e-21	14.748	37.4901	0.85228	ACTG1///ACTB	actin gamma 1///actin beta
220546_at	8.48e-20	4.3e-21	-14.7349	37.4495	-1.18605	LOC101929115///KMT2A	uncharacterized LOC101929115///lysine methyltransferase 2A
216108_at	8.56e-20	4.34e-21	-14.7316	37.4393	-1.39464	LOC105373738	uncharacterized LOC105373738
37586_at	8.56e-20	4.34e-21	14.7315	37.439	0.675224	ZNF142	zinc finger protein 142
221827_at	8.74e-20	4.44e-21	14.7242	37.4165	2.19705	RBCK1	RANBP2-type and C3HC4-type zinc finger containing 1
210636_at	8.78e-20	4.46e-21	14.7226	37.4115	1.21067	PPARD	peroxisome proliferator activated receptor delta
200622_x_at	8.95e-20	4.55e-21	14.7161	37.3913	1.32669	CALM3///CALM2///CALM1	calmodulin 3///calmodulin 2///calmodulin 1
213444_at	9.03e-20	4.6e-21	14.7129	37.3815	1.12588	ZNF862	zinc finger protein 862
213893_x_at	9.04e-20	4.61e-21	14.7122	37.3792	1.48745	PMS2P9///PMS2P5	PMS1 homolog 2, mismatch repair system component pseudogene 9///PMS1 homolog 2, mismatch repair system component pseudogene 5
201763_s_at	9.23e-20	4.71e-21	14.7051	37.3572	0.929726	DAXX	death domain associated protein
213904_at	9.23e-20	4.71e-21	-14.7048	37.3564	-1.15492	FRRS1L	ferric chelate reductase 1 like
212320_at	9.24e-20	4.72e-21	14.7041	37.3542	1.24914	TUBB	tubulin beta class I
213801_x_at	9.27e-20	4.74e-21	14.7029	37.3503	1.03545	RPSAP19///RPSAP9///SNORA6///RPSAP58///SNORA62///RPSA	ribosomal protein SA pseudogene 19///ribosomal protein SA pseudogene 9///small nucleolar RNA, H/ACA box 6///ribosomal protein SA pseudogene 58///small nucleolar RNA, H/ACA box 62///ribosomal protein SA
203089_s_at	9.4e-20	4.81e-21	14.698	37.3351	0.894546	HTRA2	HtrA serine peptidase 2
221870_at	9.44e-20	4.84e-21	14.6964	37.3302	1.74168	EHD2	EH domain containing 2
217534_at	9.49e-20	4.87e-21	-14.6945	37.3243	-1.73882	FAM49B	family with sequence similarity 49 member B
200717_x_at	9.58e-20	4.92e-21	14.691	37.3134	0.775197	RPL7	ribosomal protein L7
207132_x_at	9.58e-20	4.92e-21	14.6907	37.3125	1.22008	PFDN5	prefoldin subunit 5
38447_at	9.62e-20	4.95e-21	14.6891	37.3075	0.793676	GRK2	G protein-coupled receptor kinase 2
219753_at	9.78e-20	5.03e-21	14.6834	37.2899	1.06417	STAG3	stromal antigen 3
213733_at	9.89e-20	5.1e-21	14.6796	37.2779	1.58204	MYO1F	myosin IF
214254_at	9.91e-20	5.11e-21	-14.6787	37.2753	-1.30731	MAGEA4	MAGE family member A4
200900_s_at	1.01e-19	5.23e-21	14.6712	37.2519	2.0102	M6PR	mannose-6-phosphate receptor, cation dependent
200060_s_at	1.02e-19	5.27e-21	14.6687	37.2442	1.06748	RNPS1	RNA binding protein with serine rich domain 1
215929_at	1.02e-19	5.28e-21	-14.6678	37.2415	-1.32561	LINC00837	long intergenic non-protein coding RNA 837
206322_at	1.03e-19	5.32e-21	-14.6657	37.2349	-1.21602	SYN3	synapsin III
213786_at	1.03e-19	5.35e-21	14.6636	37.2282	2.25605	TAX1BP1	Tax1 binding protein 1
206236_at	1.05e-19	5.45e-21	14.6579	37.2105	1.1041	GPR4	G protein-coupled receptor 4
218014_at	1.06e-19	5.48e-21	14.6559	37.2044	1.03388	NUP85	nucleoporin 85
211063_s_at	1.07e-19	5.54e-21	14.6522	37.193	1.515	NCK1	NCK adaptor protein 1
203756_at	1.08e-19	5.62e-21	14.6478	37.1793	1.61121	ARHGEF17	Rho guanine nucleotide exchange factor 17
208801_at	1.09e-19	5.65e-21	14.6459	37.1731	1.0751	SRP72	signal recognition particle 72
206425_s_at	1.1e-19	5.75e-21	14.6404	37.1561	1.66648	TRPC3	transient receptor potential cation channel subfamily C member 3
215087_at	1.13e-19	5.91e-21	14.6316	37.1287	1.22196	C15orf39	chromosome 15 open reading frame 39
209439_s_at	1.14e-19	5.96e-21	14.6285	37.1192	1.54575	PHKA2	phosphorylase kinase regulatory subunit alpha 2
218235_s_at	1.17e-19	6.1e-21	14.6211	37.0961	1.06493	UTP11	UTP11, small subunit processome component homolog (S. cerevisiae)
212356_at	1.18e-19	6.16e-21	14.6181	37.0866	0.682018	KHNYN	KH and NYN domain containing
202372_at	1.18e-19	6.18e-21	14.617	37.0832	1.07884	RAB3GAP2///AURKAPS1	RAB3 GTPase activating non-catalytic protein subunit 2///aurora kinase A pseudogene 1
221249_s_at	1.19e-19	6.21e-21	-14.6152	37.0778	-1.18633	FAM117A	family with sequence similarity 117 member A
202887_s_at	1.22e-19	6.37e-21	14.6071	37.0525	2.77222	DDIT4	DNA damage inducible transcript 4
209310_s_at	1.23e-19	6.45e-21	14.6031	37.04	1.49119	CASP4	caspase 4
209118_s_at	1.25e-19	6.54e-21	14.599	37.0271	2.21239	TUBA1A	tubulin alpha 1a
216752_at	1.25e-19	6.54e-21	-14.5989	37.0268	-2.84754	PIK3R4	phosphoinositide-3-kinase regulatory subunit 4
219890_at	1.25e-19	6.56e-21	14.5977	37.0231	1.85246	CLEC5A	C-type lectin domain family 5 member A
209491_s_at	1.28e-19	6.74e-21	-14.5891	36.9963	-1.13085	CAND1.11///AMPD3	uncharacterized LOC100130460///adenosine monophosphate deaminase 3
219520_s_at	1.32e-19	6.94e-21	14.5795	36.9664	1.80342	WWC3	WWC family member 3
201724_s_at	1.32e-19	6.95e-21	14.5789	36.9646	1.29591	GALNT1	polypeptide N-acetylgalactosaminyltransferase 1
219293_s_at	1.35e-19	7.1e-21	14.572	36.943	1.14592	OLA1	Obg-like ATPase 1
209593_s_at	1.35e-19	7.13e-21	14.5709	36.9395	0.876678	TOR1B	torsin family 1 member B
217768_at	1.35e-19	7.14e-21	14.5705	36.9383	0.975966	C14orf166	chromosome 14 open reading frame 166
203175_at	1.37e-19	7.22e-21	14.5669	36.9271	1.36914	RHOG	ras homolog family member G
201354_s_at	1.38e-19	7.31e-21	14.5628	36.9144	1.42267	BAZ2A	bromodomain adjacent to zinc finger domain 2A
221091_at	1.41e-19	7.46e-21	-14.5562	36.8937	-1.2614	INSL5	insulin like 5
201049_s_at	1.42e-19	7.51e-21	14.5542	36.8875	1.09188	RPS18	ribosomal protein S18
202244_at	1.43e-19	7.58e-21	14.551	36.8776	1.12799	PSMB4	proteasome subunit beta 4
206673_at	1.43e-19	7.59e-21	14.5508	36.8769	1.03706	GPR176	G protein-coupled receptor 176
216237_s_at	1.44e-19	7.67e-21	14.5473	36.866	1.5534	MCM5	minichromosome maintenance complex component 5
209250_at	1.44e-19	7.67e-21	14.5473	36.8659	2.14213	DEGS1	delta 4-desaturase, sphingolipid 1
206687_s_at	1.46e-19	7.75e-21	14.5439	36.8552	1.32222	PTPN6	protein tyrosine phosphatase, non-receptor type 6
218209_s_at	1.48e-19	7.9e-21	-14.5377	36.8361	-1.17654	RPRD1A	regulation of nuclear pre-mRNA domain containing 1A
218542_at	1.51e-19	8.07e-21	14.5308	36.8144	1.83696	CEP55	centrosomal protein 55
221021_s_at	1.52e-19	8.13e-21	14.5283	36.8066	1.00123	CTNNBL1	catenin beta like 1
218405_at	1.53e-19	8.2e-21	14.5259	36.799	0.676111	ABT1	activator of basal transcription 1
202442_at	1.55e-19	8.3e-21	14.5219	36.7864	1.40947	AP3S1	adaptor related protein complex 3 sigma 1 subunit
204422_s_at	1.55e-19	8.3e-21	14.5218	36.7862	1.86501	FGF2	fibroblast growth factor 2
207256_at	1.59e-19	8.5e-21	14.5143	36.7628	1.47725	MBL2	mannose binding lectin 2
218403_at	1.59e-19	8.53e-21	14.513	36.7586	0.933659	TRIAP1	TP53 regulated inhibitor of apoptosis 1
218443_s_at	1.62e-19	8.71e-21	14.5064	36.7381	1.2512	DAZAP1	DAZ associated protein 1
218232_at	1.67e-19	8.94e-21	14.498	36.7117	2.58158	C1QA	complement C1q A chain
211989_at	1.68e-19	9e-21	14.4957	36.7044	1.3358	SMARCE1	SWI/SNF related, matrix associated, actin dependent regulator of chromatin, subfamily e, member 1
211982_x_at	1.68e-19	9.03e-21	14.4946	36.7012	0.983157	XPO6	exportin 6
222338_x_at	1.71e-19	9.2e-21	14.4887	36.6828	0.998391
202858_at	1.79e-19	9.63e-21	14.4739	36.6363	0.965482	U2AF1	U2 small nuclear RNA auxiliary factor 1
200091_s_at	1.8e-19	9.69e-21	14.4722	36.6309	1.22717	RPS25	ribosomal protein S25
204617_s_at	1.81e-19	9.76e-21	14.4697	36.6233	0.892139	ACD	adrenocortical dysplasia homolog
213514_s_at	1.81e-19	9.77e-21	-14.4694	36.6224	-1.37692	DIAPH1	diaphanous related formin 1
202157_s_at	1.85e-19	1e-20	14.4612	36.5965	1.859	CELF2	CUGBP, Elav-like family member 2
44120_at	1.85e-19	1e-20	14.4609	36.5957	1.08676	ADCK2	aarF domain containing kinase 2
201338_x_at	1.86e-19	1.01e-20	14.4601	36.5932	1.58092	GTF3A	general transcription factor IIIA
220012_at	1.89e-19	1.02e-20	-14.4551	36.5773	-1.41578	ERO1B	endoplasmic reticulum oxidoreductase 1 beta
38269_at	1.9e-19	1.03e-20	14.4522	36.5682	0.900385	PRKD2	protein kinase D2
222268_x_at	1.9e-19	1.03e-20	-14.4513	36.5656	-1.28483	MUC5B	mucin 5B, oligomeric mucus/gel-forming
202896_s_at	1.95e-19	1.06e-20	14.4439	36.5423	1.22435	SIRPA	signal regulatory protein alpha
218797_s_at	1.97e-19	1.07e-20	14.4402	36.5307	0.754269	SIRT7	sirtuin 7
209496_at	1.99e-19	1.08e-20	14.4371	36.5209	1.85542	RARRES2	retinoic acid receptor responder 2
201281_at	2.04e-19	1.11e-20	14.4285	36.4941	1.19059	ADRM1	adhesion regulating molecule 1
220495_s_at	2.06e-19	1.12e-20	14.4247	36.4821	1.41642	TXNDC15	thioredoxin domain containing 15
215081_at	2.07e-19	1.13e-20	14.4227	36.4758	2.05999	KIAA1024	KIAA1024
201700_at	2.07e-19	1.13e-20	14.4223	36.4747	1.19025	CCND3	cyclin D3
203132_at	2.07e-19	1.13e-20	14.422	36.4737	2.18271	RB1	RB transcriptional corepressor 1
221923_s_at	2.13e-19	1.16e-20	14.4137	36.4476	1.60046	NPM1	nucleophosmin
31837_at	2.19e-19	1.2e-20	14.4038	36.4164	0.838512	LMF2	lipase maturation factor 2
209104_s_at	2.2e-19	1.21e-20	14.4019	36.4105	1.19171	NHP2	NHP2 ribonucleoprotein
206254_at	2.21e-19	1.21e-20	-14.4003	36.4054	-2.80566	EGF	epidermal growth factor
215529_x_at	2.22e-19	1.22e-20	14.3981	36.3985	2.23075	DIP2A	disco interacting protein 2 homolog A
49077_at	2.24e-19	1.23e-20	14.3962	36.3926	0.702189	PPME1	protein phosphatase methylesterase 1
206456_at	2.26e-19	1.24e-20	-14.3918	36.3788	-1.83622	GABRA5	gamma-aminobutyric acid type A receptor alpha5 subunit
218387_s_at	2.26e-19	1.25e-20	14.3915	36.3779	1.35549	PGLS	6-phosphogluconolactonase
79005_at	2.28e-19	1.25e-20	14.3892	36.3704	0.960455	SLC35E1	solute carrier family 35 member E1
219122_s_at	2.29e-19	1.26e-20	14.3873	36.3645	0.856547	THG1L	tRNA-histidine guanylyltransferase 1 like
204740_at	2.4e-19	1.32e-20	-14.3728	36.319	-1.15358	CNKSR1	connector enhancer of kinase suppressor of Ras 1
201786_s_at	2.44e-19	1.34e-20	14.3672	36.3014	1.03854	ADAR	adenosine deaminase, RNA specific
217090_at	2.46e-19	1.36e-20	14.3632	36.2889	1.21627	ADAM3A	ADAM metallopeptidase domain 3A (pseudogene)
204735_at	2.56e-19	1.42e-20	14.3504	36.2484	1.52511	PDE4A	phosphodiesterase 4A
202800_at	2.58e-19	1.43e-20	14.3479	36.2408	1.49361	SLC1A3	solute carrier family 1 member 3
215329_s_at	2.59e-19	1.43e-20	14.347	36.238	1.40987	CDK11A///CDK11B	cyclin dependent kinase 11A///cyclin dependent kinase 11B
212116_at	2.59e-19	1.44e-20	14.3456	36.2335	0.797536	TRIM27	tripartite motif containing 27
206939_at	2.67e-19	1.48e-20	14.3367	36.2055	1.62407	DCC	DCC netrin 1 receptor
217774_s_at	2.71e-19	1.5e-20	14.3314	36.1887	1.21288	TRMT112	tRNA methyltransferase 11-2 homolog (S. cerevisiae)
212791_at	2.76e-19	1.53e-20	14.3249	36.1681	1.17337	C1orf216	chromosome 1 open reading frame 216
221516_s_at	2.8e-19	1.56e-20	14.3203	36.1537	0.973808	MIEF1	mitochondrial elongation factor 1
212971_at	2.86e-19	1.59e-20	14.3136	36.1327	1.68102	CARS	cysteinyl-tRNA synthetase
218507_at	2.86e-19	1.59e-20	14.3127	36.1298	3.49442	HILPDA	hypoxia inducible lipid droplet associated
208904_s_at	2.86e-19	1.59e-20	14.3123	36.1286	0.928	RPS28	ribosomal protein S28
204820_s_at	2.87e-19	1.6e-20	14.3109	36.1241	2.16968	BTN3A2///BTN3A3	butyrophilin subfamily 3 member A2///butyrophilin subfamily 3 member A3
204306_s_at	2.89e-19	1.61e-20	14.3084	36.1162	1.48866	CD151	CD151 molecule (Raph blood group)
208063_s_at	2.9e-19	1.62e-20	-14.3077	36.1139	-1.09744	CAPN9	calpain 9
201390_s_at	2.9e-19	1.62e-20	14.3074	36.1132	1.06846	CSNK2B	casein kinase 2 beta
212576_at	2.91e-19	1.63e-20	14.3062	36.1094	1.36397	MGRN1	mahogunin ring finger 1
207551_s_at	2.96e-19	1.66e-20	14.3002	36.0902	0.767031	MSL3	male-specific lethal 3 homolog (Drosophila)
221667_s_at	2.99e-19	1.67e-20	14.2967	36.0793	2.13919	HSPB8	heat shock protein family B (small) member 8
214288_s_at	2.99e-19	1.68e-20	14.296	36.0772	1.22349	PSMB1	proteasome subunit beta 1
200877_at	3.02e-19	1.7e-20	14.2925	36.066	1.16852	CCT4	chaperonin containing TCP1 subunit 4
211750_x_at	3.03e-19	1.7e-20	14.2917	36.0636	1.64958	TUBA1C	tubulin alpha 1c
221010_s_at	3.03e-19	1.7e-20	-14.2915	36.063	-1.3108	SIRT5	sirtuin 5
207596_at	3.03e-19	1.7e-20	-14.291	36.0612	-1.29268	SLCO4C1	solute carrier organic anion transporter family member 4C1
214617_at	3.07e-19	1.73e-20	14.2869	36.0485	0.965795	PRF1	perforin 1
213926_s_at	3.17e-19	1.78e-20	-14.2763	36.0151	-2.44587	AGFG1	ArfGAP with FG repeats 1
202639_s_at	3.32e-19	1.87e-20	14.2612	35.9672	0.655238	RANBP3	RAN binding protein 3
200599_s_at	3.36e-19	1.89e-20	14.2574	35.9552	1.1389	MIR3652///HSP90B1	microRNA 3652///heat shock protein 90 beta family member 1
203104_at	3.38e-19	1.91e-20	14.2552	35.9482	1.74332	CSF1R	colony stimulating factor 1 receptor
216128_at	3.41e-19	1.92e-20	-14.2523	35.9392	-1.03312	LOC101929597///TBCD	uncharacterized LOC101929597///tubulin folding cofactor D
215633_x_at	3.41e-19	1.93e-20	14.2513	35.9359	1.4179	LST1	leukocyte specific transcript 1
210132_at	3.43e-19	1.94e-20	-14.2494	35.9298	-1.21427	EFNA3	ephrin A3
216654_at	3.48e-19	1.97e-20	14.2448	35.9155	1.03711	TNXB	tenascin XB
33778_at	3.49e-19	1.98e-20	14.2438	35.9123	0.81445	TBC1D22A	TBC1 domain family member 22A
211542_x_at	3.53e-19	2e-20	14.24	35.9002	1.01492	RPS10	ribosomal protein S10
201306_s_at	3.57e-19	2.02e-20	14.2362	35.8882	1.36149	ANP32B	acidic nuclear phosphoprotein 32 family member B
202605_at	3.64e-19	2.07e-20	14.2293	35.8665	1.38858	GUSB	glucuronidase beta
211271_x_at	3.69e-19	2.1e-20	14.225	35.8528	1.10393	MIR4745///PTBP1	microRNA 4745///polypyrimidine tract binding protein 1
217926_at	3.83e-19	2.18e-20	14.2125	35.8131	1.00911	C19orf53	chromosome 19 open reading frame 53
215471_s_at	3.9e-19	2.22e-20	-14.207	35.796	-1.38863	MAP7	microtubule associated protein 7
210321_at	3.9e-19	2.22e-20	14.2063	35.7937	0.961531	GZMH	granzyme H
219725_at	3.91e-19	2.23e-20	14.2054	35.7908	1.19372	TREM2	triggering receptor expressed on myeloid cells 2
219310_at	3.93e-19	2.24e-20	14.2035	35.7848	1.41372	SYNDIG1	synapse differentiation inducing 1
219762_s_at	4.01e-19	2.29e-20	14.1971	35.7645	2.01486	RPL36	ribosomal protein L36
211759_x_at	4.01e-19	2.29e-20	14.1968	35.7634	1.05693	TBCB	tubulin folding cofactor B
217762_s_at	4.02e-19	2.3e-20	14.1959	35.7606	2.02896	RAB31	RAB31, member RAS oncogene family
215406_at	4.02e-19	2.31e-20	14.1948	35.7573	1.29104
221447_s_at	4.02e-19	2.31e-20	-14.1947	35.7569	-0.863017	GLT8D2	glycosyltransferase 8 domain containing 2
216551_x_at	4.02e-19	2.31e-20	14.1946	35.7566	0.804389	PLCG1	phospholipase C gamma 1
220087_at	4.03e-19	2.31e-20	14.1938	35.7541	0.616058	BCO1	beta-carotene oxygenase 1
203217_s_at	4.04e-19	2.32e-20	14.193	35.7514	1.20693	ST3GAL5	ST3 beta-galactoside alpha-2,3-sialyltransferase 5
200891_s_at	4.11e-19	2.36e-20	14.1869	35.7321	1.2258	SSR1	signal sequence receptor subunit 1
200063_s_at	4.12e-19	2.37e-20	14.1859	35.7291	1.04259	NPM1	nucleophosmin
203956_at	4.13e-19	2.38e-20	14.1847	35.7251	1.26233	MORC2	MORC family CW-type zinc finger 2
215824_at	4.19e-19	2.41e-20	-14.1803	35.7113	-2.06628
222060_at	4.19e-19	2.42e-20	14.1796	35.7089	1.49844	KRT8P12	keratin 8 pseudogene 12
203550_s_at	4.2e-19	2.42e-20	14.1793	35.708	0.71791	FAM189B	family with sequence similarity 189 member B
220766_at	4.27e-19	2.47e-20	-14.1732	35.6887	-1.04124	BTG4	BTG anti-proliferation factor 4
210224_at	4.29e-19	2.48e-20	14.1713	35.6827	0.903058	MR1	major histocompatibility complex, class I-related
213214_x_at	4.35e-19	2.52e-20	14.1671	35.6695	0.869881	ACTG1///ACTB	actin gamma 1///actin beta
221767_x_at	4.37e-19	2.53e-20	14.1655	35.6644	1.17831	HDLBP	high density lipoprotein binding protein
202042_at	4.48e-19	2.6e-20	14.157	35.6373	1.10595	LOC101928623///HARS	uncharacterized LOC101928623///histidyl-tRNA synthetase
209219_at	4.5e-19	2.61e-20	14.1555	35.6325	1.11302	MIR1236///NELFE	microRNA 1236///negative elongation factor complex member E
201128_s_at	4.63e-19	2.69e-20	14.146	35.6024	1.72175	ACLY	ATP citrate lyase
208361_s_at	4.69e-19	2.72e-20	14.1417	35.5889	0.603219	POLR3D	RNA polymerase III subunit D
214053_at	4.77e-19	2.77e-20	-14.1363	35.5716	-1.49577	ERBB4	erb-b2 receptor tyrosine kinase 4
221075_s_at	4.77e-19	2.78e-20	14.1355	35.569	1.48879	NCR2	natural cytotoxicity triggering receptor 2
211026_s_at	4.77e-19	2.78e-20	14.1354	35.5688	1.60879	MGLL	monoglyceride lipase
205901_at	4.77e-19	2.78e-20	-14.1354	35.5687	-1.05726	PNOC	prepronociceptin
221203_s_at	4.8e-19	2.8e-20	14.1333	35.562	1.69115	YEATS2	YEATS domain containing 2
216928_at	4.93e-19	2.87e-20	14.1248	35.5352	1.10635	TAL1	TAL bHLH transcription factor 1, erythroid differentiation factor
216306_x_at	4.97e-19	2.9e-20	14.1218	35.5256	1.07373	MIR4745///PTBP1	microRNA 4745///polypyrimidine tract binding protein 1
211603_s_at	5.02e-19	2.93e-20	-14.1184	35.5147	-1.152	ETV4	ETS variant 4
34221_at	5.22e-19	3.05e-20	14.1059	35.4751	0.805312	HMGXB3	HMG-box containing 3
201759_at	5.24e-19	3.06e-20	-14.1045	35.4708	-1.09107	TBCD	tubulin folding cofactor D
216246_at	5.34e-19	3.13e-20	-14.0978	35.4492	-1.29117
212708_at	5.36e-19	3.14e-20	14.0965	35.4453	0.66285	MSL1	male specific lethal 1 homolog
221123_x_at	5.36e-19	3.14e-20	14.0964	35.4448	2.83506	FBXO16///ZNF395	F-box protein 16///zinc finger protein 395
219388_at	5.42e-19	3.18e-20	-14.0927	35.4331	-1.11178	GRHL2	grainyhead like transcription factor 2
213562_s_at	5.44e-19	3.19e-20	-14.0915	35.4292	-1.35232	SQLE	squalene epoxidase
208753_s_at	5.45e-19	3.21e-20	14.0902	35.4252	1.39573	NAP1L1	nucleosome assembly protein 1 like 1
203900_at	5.47e-19	3.22e-20	-14.0888	35.4206	-1.03888	SZT2	seizure threshold 2 homolog (mouse)
211047_x_at	5.47e-19	3.22e-20	14.0888	35.4206	1.47082	AP2S1	adaptor related protein complex 2 sigma 1 subunit
209565_at	5.47e-19	3.22e-20	14.0884	35.4194	1.17859	RNF113A	ring finger protein 113A
205566_at	5.54e-19	3.27e-20	14.0843	35.4065	1.0116	ABHD2	abhydrolase domain containing 2
209657_s_at	5.56e-19	3.28e-20	-14.0826	35.4008	-2.56788	HSF2	heat shock transcription factor 2
200896_x_at	5.58e-19	3.3e-20	14.0813	35.3969	0.889538	HDGF	hepatoma-derived growth factor
212548_s_at	5.58e-19	3.3e-20	14.081	35.3958	1.10105	FRYL	FRY like transcription coactivator
218089_at	5.62e-19	3.32e-20	14.0787	35.3886	0.712345	AAR2	AAR2 splicing factor homolog
200650_s_at	5.63e-19	3.33e-20	14.078	35.3865	2.13156	LDHA	lactate dehydrogenase A
210538_s_at	5.66e-19	3.35e-20	14.0759	35.3798	3.16888	BIRC3	baculoviral IAP repeat containing 3
60471_at	5.77e-19	3.42e-20	14.0695	35.3594	0.924865	RIN3	Ras and Rab interactor 3
200971_s_at	5.78e-19	3.43e-20	14.069	35.3576	1.41086	SERP1	stress-associated endoplasmic reticulum protein 1
201632_at	5.79e-19	3.44e-20	14.068	35.3545	0.931362	EIF2B1	eukaryotic translation initiation factor 2B subunit alpha
200933_x_at	5.82e-19	3.46e-20	14.0662	35.3489	0.90201	RPS4X	ribosomal protein S4, X-linked
206643_at	5.94e-19	3.53e-20	14.0596	35.3279	1.38358	HAL	histidine ammonia-lyase
204950_at	5.94e-19	3.53e-20	14.0593	35.3268	0.802945	CARD8	caspase recruitment domain family member 8
212832_s_at	5.95e-19	3.55e-20	14.0583	35.3236	0.767792	CKAP5	cytoskeleton associated protein 5
221051_s_at	6.01e-19	3.58e-20	-14.0549	35.3128	-1.24718	NMRK2	nicotinamide riboside kinase 2
218556_at	6.07e-19	3.62e-20	14.0516	35.3024	1.07444	ORMDL2	ORMDL sphingolipid biosynthesis regulator 2
209050_s_at	6.1e-19	3.64e-20	14.05	35.2971	1.26833	RALGDS	ral guanine nucleotide dissociation stimulator
219488_at	6.14e-19	3.67e-20	-14.0478	35.2903	-1.12005	A4GALT	alpha 1,4-galactosyltransferase
211270_x_at	6.22e-19	3.72e-20	14.0433	35.2757	1.12985	PTBP1	polypyrimidine tract binding protein 1
213762_x_at	6.38e-19	3.81e-20	14.0352	35.2502	1.02369	LOC101928747///RBMX///SNORD61	uncharacterized LOC101928747///RNA binding motif protein, X-linked///small nucleolar RNA, C/D box 61
204370_at	6.48e-19	3.88e-20	14.03	35.2333	0.658823	CLP1	cleavage and polyadenylation factor I subunit 1
217992_s_at	6.49e-19	3.89e-20	14.0294	35.2314	1.57179	EFHD2	EF-hand domain family member D2
200092_s_at	6.52e-19	3.91e-20	14.0273	35.2247	1.05042	RPL37	ribosomal protein L37
217740_x_at	6.64e-19	3.98e-20	14.0215	35.2063	0.94114	SNORD24///SNORD36A///SNORD36B///RPL7A	small nucleolar RNA, C/D box 24///small nucleolar RNA, C/D box 36A///small nucleolar RNA, C/D box 36B///ribosomal protein L7a
203940_s_at	6.67e-19	4.01e-20	14.0197	35.2007	1.8066	VASH1	vasohibin 1
201743_at	6.67e-19	4.01e-20	14.0194	35.1996	2.27026	CD14	CD14 molecule
220324_at	6.78e-19	4.08e-20	-14.0144	35.1835	-2.15251	LINC00472	long intergenic non-protein coding RNA 472
203947_at	6.94e-19	4.18e-20	14.0066	35.1587	0.933038	CSTF3	cleavage stimulation factor subunit 3
220316_at	6.96e-19	4.19e-20	14.0052	35.1545	0.994363	NPAS3	neuronal PAS domain protein 3
217094_s_at	7e-19	4.22e-20	-14.0032	35.148	-0.911871	ITCH	itchy E3 ubiquitin protein ligase
213572_s_at	7.09e-19	4.28e-20	13.9989	35.1343	1.51891	SERPINB1	serpin family B member 1
213941_x_at	7.19e-19	4.34e-20	13.9946	35.1205	1.12326	RPS7	ribosomal protein S7
213349_at	7.2e-19	4.35e-20	13.9938	35.118	1.9345	TMCC1	transmembrane and coiled-coil domain family 1
216036_x_at	7.27e-19	4.39e-20	-13.9907	35.108	-0.983347	WDTC1	WD and tetratricopeptide repeats 1
216342_x_at	7.28e-19	4.4e-20	13.9899	35.1056	0.914975
216112_at	7.28e-19	4.41e-20	-13.9895	35.1042	-1.27163
215681_at	7.37e-19	4.47e-20	13.9854	35.0911	1.22441	KIAA1654	KIAA1654 protein
205255_x_at	7.58e-19	4.6e-20	13.9763	35.0621	1.8736	TCF7	transcription factor 7 (T-cell specific, HMG-box)
203066_at	7.62e-19	4.62e-20	13.9747	35.0568	1.97034	CHST15	carbohydrate (N-acetylgalactosamine 4-sulfate 6-O) sulfotransferase 15
213815_x_at	7.73e-19	4.7e-20	-13.9696	35.0407	-1.04432	CACTIN	cactin, spliceosome C complex subunit
210047_at	7.82e-19	4.75e-20	-13.9659	35.0287	-1.12315	SLC11A2	solute carrier family 11 member 2
201863_at	7.82e-19	4.76e-20	13.9654	35.0272	0.982081	FAM32A	family with sequence similarity 32 member A
210550_s_at	7.82e-19	4.76e-20	13.9654	35.0271	0.760115	RASGRF1	Ras protein specific guanine nucleotide releasing factor 1
213175_s_at	8e-19	4.87e-20	13.9581	35.0037	1.11362	SNRPB	small nuclear ribonucleoprotein polypeptides B and B1
201783_s_at	8e-19	4.88e-20	13.9577	35.0026	1.04106	RELA	RELA proto-oncogene, NF-kB subunit
205693_at	8.1e-19	4.94e-20	-13.9536	34.9894	-1.01568	TNNT3	troponin T3, fast skeletal type
202406_s_at	8.22e-19	5.02e-20	13.9486	34.9734	1.10365	TIAL1	TIA1 cytotoxic granule-associated RNA binding protein-like 1
221137_at	8.23e-19	5.03e-20	-13.948	34.9715	-1.32373
212056_at	8.24e-19	5.03e-20	13.9477	34.9706	1.14487	GSE1	Gse1 coiled-coil protein
212284_x_at	8.39e-19	5.13e-20	13.9415	34.9509	0.632675	LOC101928826///TPT1	uncharacterized LOC101928826///tumor protein, translationally-controlled 1
213002_at	8.52e-19	5.21e-20	13.9367	34.9353	1.49562	MARCKS	myristoylated alanine rich protein kinase C substrate
219486_at	8.54e-19	5.23e-20	13.9357	34.932	1.0851	DUS2	dihydrouridine synthase 2
207760_s_at	8.72e-19	5.34e-20	13.9289	34.9103	1.4195	NCOR2	nuclear receptor corepressor 2
221101_at	8.75e-19	5.37e-20	-13.9273	34.9053	-1.13264
200652_at	8.76e-19	5.38e-20	13.9269	34.904	1.52669	SSR2	signal sequence receptor subunit 2
208676_s_at	8.84e-19	5.43e-20	13.9239	34.8943	1.18292	PA2G4	proliferation-associated 2G4
222223_s_at	9.08e-19	5.58e-20	13.9153	34.8669	1.2652	IL36RN	interleukin 36 receptor antagonist
204175_at	9.44e-19	5.81e-20	13.9027	34.8266	1.96807	ZNF593	zinc finger protein 593
33304_at	9.46e-19	5.83e-20	13.9017	34.8234	1.43909	ISG20	interferon stimulated exonuclease gene 20
217879_at	9.72e-19	5.99e-20	13.893	34.7953	0.883254	CDC27	cell division cycle 27
213351_s_at	9.79e-19	6.04e-20	13.8904	34.7871	2.15778	TMCC1	transmembrane and coiled-coil domain family 1
211717_at	9.89e-19	6.1e-20	13.8871	34.7766	0.718992	ANKRD40	ankyrin repeat domain 40
213101_s_at	9.9e-19	6.12e-20	13.8865	34.7747	1.36886	ACTR3	ARP3 actin related protein 3 homolog
208091_s_at	1.01e-18	6.27e-20	13.8788	34.7499	1.59036	VOPP1	vesicular, overexpressed in cancer, prosurvival protein 1
218420_s_at	1.02e-18	6.31e-20	-13.8769	34.7437	-0.881788	PROSER1	proline and serine rich 1
202968_s_at	1.03e-18	6.35e-20	13.8746	34.7365	0.875889	DYRK2	dual specificity tyrosine phosphorylation regulated kinase 2
212899_at	1.04e-18	6.42e-20	13.8712	34.7255	1.47361	CDK19	cyclin dependent kinase 19
221712_s_at	1.05e-18	6.52e-20	13.8665	34.7106	0.762071	WDR74	WD repeat domain 74
64486_at	1.06e-18	6.59e-20	13.863	34.6992	1.02311	CORO1B	coronin 1B
219862_s_at	1.06e-18	6.61e-20	13.8622	34.6967	1.0909	NARF	nuclear prelamin A recognition factor
212811_x_at	1.06e-18	6.61e-20	13.8621	34.6964	0.870346	SLC1A4	solute carrier family 1 member 4
214526_x_at	1.06e-18	6.62e-20	13.8618	34.6954	1.39482	PMS2P1	PMS1 homolog 2, mismatch repair system component pseudogene 1
203047_at	1.06e-18	6.62e-20	13.8617	34.6951	1.12749	STK10	serine/threonine kinase 10
202659_at	1.07e-18	6.65e-20	13.8601	34.6897	1.88797	PSMB10	proteasome subunit beta 10
208829_at	1.07e-18	6.66e-20	13.8599	34.6891	2.12625	TAPBP	TAP binding protein (tapasin)
209277_at	1.09e-18	6.77e-20	13.8548	34.6727	4.05185	TFPI2	tissue factor pathway inhibitor 2
201849_at	1.09e-18	6.77e-20	13.8545	34.6718	1.95526	BNIP3	BCL2 interacting protein 3
212496_s_at	1.1e-18	6.85e-20	13.851	34.6606	0.948278	KDM4B	lysine demethylase 4B
215909_x_at	1.11e-18	6.95e-20	13.8462	34.6453	0.871662	MINK1	misshapen like kinase 1
211974_x_at	1.11e-18	6.96e-20	13.8458	34.6439	1.02023	RBPJ	recombination signal binding protein for immunoglobulin kappa J region
212426_s_at	1.11e-18	6.97e-20	13.8456	34.6433	1.28636	YWHAQ	tyrosine 3-monooxygenase/tryptophan 5-monooxygenase activation protein theta
220612_at	1.12e-18	6.99e-20	-13.8448	34.6406	-1.35656
206845_s_at	1.13e-18	7.07e-20	13.8412	34.629	0.758142	RNF40	ring finger protein 40
221663_x_at	1.14e-18	7.14e-20	13.838	34.619	0.73197	HRH3	histamine receptor H3
220782_x_at	1.15e-18	7.24e-20	13.8334	34.6041	0.79129	KLK12	kallikrein related peptidase 12
210750_s_at	1.17e-18	7.37e-20	13.828	34.5867	1.02448	DLGAP1	DLG associated protein 1
220096_at	1.22e-18	7.65e-20	13.8161	34.5486	1.0819
206246_at	1.23e-18	7.73e-20	13.8129	34.5383	0.696888	PFKFB4	6-phosphofructo-2-kinase/fructose-2,6-biphosphatase 4
205061_s_at	1.23e-18	7.74e-20	13.8127	34.5376	0.813319	EXOSC9	exosome component 9
217769_s_at	1.27e-18	8e-20	13.8024	34.5043	1.19754	POMP	proteasome maturation protein
213507_s_at	1.27e-18	8.01e-20	13.8019	34.5029	1.35173	KPNB1	karyopherin subunit beta 1
202076_at	1.29e-18	8.11e-20	13.7981	34.4907	1.26126	BIRC2	baculoviral IAP repeat containing 2
201870_at	1.31e-18	8.27e-20	13.792	34.4711	0.654709	TOMM34	translocase of outer mitochondrial membrane 34
220960_x_at	1.33e-18	8.41e-20	13.7866	34.4536	0.835278	RPL22	ribosomal protein L22
201004_at	1.36e-18	8.61e-20	13.7792	34.4297	1.68382	SSR4	signal sequence receptor subunit 4
208286_x_at	1.38e-18	8.7e-20	13.7761	34.4199	0.775165	POU5F1P4///POU5F1P3///POU5F1B///POU5F1	POU class 5 homeobox 1 pseudogene 4///POU class 5 homeobox 1 pseudogene 3///POU class 5 homeobox 1B///POU class 5 homeobox 1
210031_at	1.38e-18	8.7e-20	13.776	34.4194	0.904113	CD247	CD247 molecule
202507_s_at	1.4e-18	8.84e-20	13.7711	34.4036	0.634846	SNAP25	synaptosome associated protein 25
201804_x_at	1.41e-18	8.91e-20	13.7686	34.3955	1.07139	TBCB	tubulin folding cofactor B
215308_at	1.41e-18	8.92e-20	-13.7682	34.3943	-1.53825	XRCC6	X-ray repair cross complementing 6
208227_x_at	1.41e-18	8.96e-20	13.7668	34.3899	0.978962	ADAM22	ADAM metallopeptidase domain 22
216937_s_at	1.42e-18	9.01e-20	-13.7651	34.3844	-0.987075	RS1	retinoschisin 1
219329_s_at	1.42e-18	9.02e-20	13.7648	34.3834	1.03417	ATRAID	all-trans retinoic acid induced differentiation factor
213131_at	1.43e-18	9.11e-20	-13.7616	34.373	-1.12625	OLFM1	olfactomedin 1
211766_s_at	1.43e-18	9.11e-20	-13.7615	34.3728	-1.431	PNLIPRP2	pancreatic lipase related protein 2 (gene/pseudogene)
214006_s_at	1.43e-18	9.12e-20	13.7612	34.3718	0.670349	GGCX	gamma-glutamyl carboxylase
221699_s_at	1.45e-18	9.22e-20	13.7581	34.3616	0.885416	DDX50	DEAD-box helicase 50
219131_at	1.46e-18	9.34e-20	-13.754	34.3486	-1.00843	UBIAD1	UbiA prenyltransferase domain containing 1
205163_at	1.47e-18	9.35e-20	-13.7534	34.3467	-0.901661	MYLPF	myosin light chain, phosphorylatable, fast skeletal muscle
200021_at	1.48e-18	9.44e-20	13.7505	34.3374	0.954294	CFL1	cofilin 1
209610_s_at	1.49e-18	9.5e-20	13.7486	34.3311	1.00668	SLC1A4	solute carrier family 1 member 4
201434_at	1.51e-18	9.63e-20	13.7444	34.3175	1.00333	TTC1	tetratricopeptide repeat domain 1
215963_x_at	1.53e-18	9.77e-20	13.7399	34.3031	0.774503	RPL3	ribosomal protein L3
222170_at	1.53e-18	9.79e-20	-13.7393	34.3012	-0.957108	ZNF213-AS1	ZNF213 antisense RNA 1 (head to head)
211368_s_at	1.55e-18	9.96e-20	13.7339	34.2837	1.21915	CASP1	caspase 1
211080_s_at	1.58e-18	1.02e-19	-13.7275	34.2631	-1.03159	NEK2	NIMA related kinase 2
218270_at	1.6e-18	1.03e-19	13.7233	34.2496	1.05605	MRPL24	mitochondrial ribosomal protein L24
200919_at	1.6e-18	1.03e-19	13.7232	34.2493	1.01085	PHC2	polyhomeotic homolog 2
206890_at	1.62e-18	1.04e-19	-13.7202	34.2396	-1.0444	IL12RB1	interleukin 12 receptor subunit beta 1
213612_x_at	1.62e-18	1.04e-19	13.719	34.2356	1.06372	NBPF20///NBPF10///NBPF8///NBPF9///NBPF15///NBPF12///NBPF14	neuroblastoma breakpoint family member 20///neuroblastoma breakpoint family member 10///neuroblastoma breakpoint family member 8///neuroblastoma breakpoint family member 9///neuroblastoma breakpoint family member 15///neuroblastoma breakpoint family member 12///neuroblastoma breakpoint family member 14
213088_s_at	1.63e-18	1.05e-19	13.717	34.2292	0.865321	DNAJC9	DnaJ heat shock protein family (Hsp40) member C9
211522_s_at	1.65e-18	1.06e-19	-13.7145	34.221	-1.47251	GNRHR	gonadotropin releasing hormone receptor
200809_x_at	1.65e-18	1.06e-19	13.7137	34.2186	1.09663	RPL12	ribosomal protein L12
202015_x_at	1.66e-18	1.07e-19	13.7119	34.2129	3.28765	METAP2	methionyl aminopeptidase 2
207167_at	1.66e-18	1.07e-19	-13.7104	34.208	-0.673802	CD101	CD101 molecule
218994_s_at	1.67e-18	1.08e-19	-13.7098	34.206	-1.27643	STAG3L4	stromal antigen 3-like 4 (pseudogene)
212252_at	1.69e-18	1.09e-19	13.7049	34.1902	0.733058	CAMKK2	calcium/calmodulin dependent protein kinase kinase 2
217600_at	1.73e-18	1.12e-19	-13.6969	34.1643	-1.06318	SCUBE3	signal peptide, CUB domain and EGF like domain containing 3
202559_x_at	1.75e-18	1.13e-19	13.6932	34.1524	0.603932	CHTOP	chromatin target of PRMT1
201930_at	1.79e-18	1.16e-19	13.687	34.1322	1.13704	MCM6	minichromosome maintenance complex component 6
35201_at	1.79e-18	1.16e-19	13.6861	34.1293	0.814093	HNRNPL	heterogeneous nuclear ribonucleoprotein L
201973_s_at	1.79e-18	1.16e-19	13.686	34.129	1.2175	CCZ1B///CCZ1	CCZ1 homolog B, vacuolar protein trafficking and biogenesis associated///CCZ1 homolog, vacuolar protein trafficking and biogenesis associated
213381_at	1.85e-18	1.2e-19	13.6757	34.0956	1.41662	VSTM4	V-set and transmembrane domain containing 4
214585_s_at	1.85e-18	1.2e-19	13.6753	34.0946	0.642709	VPS52	VPS52, GARP complex subunit
209713_s_at	1.87e-18	1.22e-19	-13.6717	34.0829	-0.777492	SLC35D1	solute carrier family 35 member D1
209382_at	1.87e-18	1.22e-19	13.6715	34.0823	0.948009	POLR3C	RNA polymerase III subunit C
1494_f_at	1.88e-18	1.23e-19	13.6689	34.0738	1.22437	CYP2A6	cytochrome P450 family 2 subfamily A member 6
219232_s_at	1.9e-18	1.23e-19	13.6669	34.0673	2.76558	EGLN3	egl-9 family hypoxia inducible factor 3
204220_at	1.91e-18	1.25e-19	13.6636	34.0565	1.74455	GMFG	glia maturation factor gamma
201762_s_at	1.91e-18	1.25e-19	13.6634	34.0561	1.35276	MIR7703///PSME2	microRNA 7703///proteasome activator subunit 2
201062_at	1.91e-18	1.25e-19	-13.6633	34.0556	-1.97545	STOM	stomatin
203197_s_at	1.92e-18	1.25e-19	13.6625	34.0532	0.733201	C1orf123	chromosome 1 open reading frame 123
205485_at	1.92e-18	1.25e-19	13.6623	34.0523	1.71098	RYR1	ryanodine receptor 1
217256_x_at	1.95e-18	1.28e-19	13.6566	34.0338	1.37213
213456_at	1.96e-18	1.28e-19	-13.6554	34.0299	-2.02419	SOSTDC1	sclerostin domain containing 1
217949_s_at	1.98e-18	1.29e-19	13.6521	34.0193	1.76131	VKORC1	vitamin K epoxide reductase complex subunit 1
218452_at	2.01e-18	1.32e-19	13.6466	34.0015	0.825053	SMARCAL1	SWI/SNF related, matrix associated, actin dependent regulator of chromatin, subfamily a like 1
213160_at	2.02e-18	1.32e-19	13.6455	33.9979	1.41076	DOCK2	dedicator of cytokinesis 2
202027_at	2.02e-18	1.33e-19	13.6447	33.9953	1.28851	TMEM184B	transmembrane protein 184B
53202_at	2.04e-18	1.34e-19	-13.6413	33.9843	-1.24877	C7orf25///PSMA2	chromosome 7 open reading frame 25///proteasome subunit alpha 2
211474_s_at	2.05e-18	1.35e-19	13.6395	33.9786	1.47832	SERPINB6	serpin family B member 6
209604_s_at	2.07e-18	1.36e-19	-13.6364	33.9685	-1.22054	GATA3	GATA binding protein 3
208789_at	2.07e-18	1.36e-19	13.6361	33.9677	1.59849	PTRF	polymerase I and transcript release factor
209482_at	2.1e-18	1.38e-19	13.6322	33.9549	1.47909	POP7	POP7 homolog, ribonuclease P/MRP subunit
202189_x_at	2.11e-18	1.39e-19	13.6297	33.947	1.14858	MIR4745///PTBP1	microRNA 4745///polypyrimidine tract binding protein 1
216889_s_at	2.11e-18	1.39e-19	-13.6292	33.9452	-0.871976	HNF4A	hepatocyte nuclear factor 4 alpha
214276_at	2.12e-18	1.4e-19	-13.6278	33.9408	-1.26337	KLF12	Kruppel like factor 12
203269_at	2.13e-18	1.4e-19	13.6268	33.9375	1.18922	NSMAF	neutral sphingomyelinase activation associated factor
203444_s_at	2.15e-18	1.42e-19	-13.623	33.9253	-1.11478	MTA2	metastasis associated 1 family member 2
218381_s_at	2.16e-18	1.43e-19	13.6221	33.9224	1.07514	U2AF2	U2 small nuclear RNA auxiliary factor 2
217691_x_at	2.16e-18	1.43e-19	13.6214	33.92	2.14683	MIR6787///SLC16A3	microRNA 6787///solute carrier family 16 member 3
209890_at	2.16e-18	1.43e-19	13.621	33.9186	0.71166	TSPAN5	tetraspanin 5
201137_s_at	2.16e-18	1.43e-19	13.6209	33.9182	2.17392	HLA-DPB1	major histocompatibility complex, class II, DP beta 1
208223_s_at	2.17e-18	1.44e-19	-13.6186	33.9108	-1.10913	ACVR1B	activin A receptor type 1B
200791_s_at	2.19e-18	1.45e-19	13.6167	33.9047	1.09936	IQGAP1	IQ motif containing GTPase activating protein 1
217737_x_at	2.19e-18	1.46e-19	13.6156	33.9012	1.02421	RTFDC1	replication termination factor 2 domain containing 1
213455_at	2.2e-18	1.46e-19	13.614	33.8961	1.26272	FAM114A1	family with sequence similarity 114 member A1
200697_at	2.22e-18	1.48e-19	13.6113	33.8873	1.61123	HK1	hexokinase 1
44146_at	2.23e-18	1.49e-19	13.6092	33.8804	0.757796	GMEB2	glucocorticoid modulatory element binding protein 2
217301_x_at	2.24e-18	1.49e-19	13.6077	33.8755	0.96749	RBBP4	RB binding protein 4, chromatin remodeling factor
206620_at	2.35e-18	1.57e-19	-13.5927	33.8271	-1.24361	GRAP	GRB2-related adaptor protein
214707_x_at	2.37e-18	1.58e-19	-13.5901	33.8186	-2.12155	ALMS1	ALMS1, centrosome and basal body associated protein
217292_at	2.4e-18	1.6e-19	13.5861	33.8054	2.20994	MTMR7	myotubularin related protein 7
215610_at	2.41e-18	1.61e-19	13.5845	33.8002	1.19033
209087_x_at	2.43e-18	1.63e-19	13.5813	33.79	1.90721	MCAM	melanoma cell adhesion molecule
207718_x_at	2.45e-18	1.64e-19	-13.5795	33.784	-1.38612	CYP2A7	cytochrome P450 family 2 subfamily A member 7
208821_at	2.45e-18	1.64e-19	13.579	33.7825	1.33445	SNRPB	small nuclear ribonucleoprotein polypeptides B and B1
212352_s_at	2.46e-18	1.65e-19	13.5772	33.7767	1.05687	TMED10	transmembrane p24 trafficking protein 10
212115_at	2.56e-18	1.72e-19	13.5643	33.7346	1.49561	HN1L	hematological and neurological expressed 1 like
215001_s_at	2.57e-18	1.72e-19	13.5635	33.7322	1.60902	GLUL	glutamate-ammonia ligase
201985_at	2.57e-18	1.72e-19	13.563	33.7305	0.882162	KIAA0196	KIAA0196
221401_at	2.66e-18	1.78e-19	13.5525	33.6965	1.60329	CACNG5	calcium voltage-gated channel auxiliary subunit gamma 5
216871_at	2.67e-18	1.79e-19	-13.5514	33.6927	-1.03334	ZDHHC17	zinc finger DHHC-type containing 17
219619_at	2.72e-18	1.83e-19	13.5451	33.6723	3.78268	DIRAS2	DIRAS family GTPase 2
209143_s_at	2.73e-18	1.84e-19	13.5432	33.6662	1.15602	CLNS1A	chloride nucleotide-sensitive channel 1A
212042_x_at	2.76e-18	1.86e-19	13.5398	33.6551	0.776858	RPL7	ribosomal protein L7
202910_s_at	2.82e-18	1.9e-19	13.5327	33.6319	1.34954	ADGRE5	adhesion G protein-coupled receptor E5
202649_x_at	2.86e-18	1.93e-19	13.5284	33.618	1.98783	RPS19	ribosomal protein S19
214394_x_at	2.86e-18	1.93e-19	13.5282	33.6173	1.29489	EEF1D	eukaryotic translation elongation factor 1 delta
202140_s_at	2.86e-18	1.93e-19	13.528	33.6168	0.859427	CLK3	CDC like kinase 3
213096_at	2.92e-18	1.97e-19	-13.522	33.5972	-0.82835	TMCC2	transmembrane and coiled-coil domain family 2
217908_s_at	2.94e-18	1.99e-19	13.5188	33.5868	1.76075	DCAF6	DDB1 and CUL4 associated factor 6
215470_at	2.96e-18	2e-19	-13.5173	33.5821	-1.68605	GTF2H2B	general transcription factor IIH subunit 2B (pseudogene)
200761_s_at	2.97e-18	2.01e-19	13.5156	33.5764	1.38639	ARL6IP5	ADP ribosylation factor like GTPase 6 interacting protein 5
206122_at	2.97e-18	2.01e-19	13.5151	33.5747	0.979669	SOX15	SRY-box 15
208855_s_at	2.97e-18	2.01e-19	13.515	33.5745	0.822847	STK24	serine/threonine kinase 24
206479_at	2.98e-18	2.02e-19	-13.5141	33.5715	-1.78852	TRPM1	transient receptor potential cation channel subfamily M member 1
208264_s_at	2.98e-18	2.02e-19	-13.5137	33.5703	-1.30442	EIF3J	eukaryotic translation initiation factor 3 subunit J
202257_s_at	2.98e-18	2.03e-19	13.5131	33.5682	0.946658	CD2BP2	CD2 cytoplasmic tail binding protein 2
222246_at	2.98e-18	2.03e-19	-13.5129	33.5677	-1.63602
206614_at	3e-18	2.04e-19	-13.5115	33.5632	-0.828692	GDF5	growth differentiation factor 5
217118_s_at	3.03e-18	2.06e-19	13.5074	33.5496	1.38385	KIAA0930	KIAA0930
204130_at	3.03e-18	2.07e-19	-13.5072	33.5489	-2.97446	HSD11B2	hydroxysteroid 11-beta dehydrogenase 2
213835_x_at	3.11e-18	2.12e-19	13.499	33.5224	0.829547	GTPBP3	GTP binding protein 3 (mitochondrial)
218399_s_at	3.13e-18	2.13e-19	13.4976	33.5177	0.855098	CDCA4	cell division cycle associated 4
201516_at	3.18e-18	2.17e-19	13.4922	33.5003	0.985103	SRM	spermidine synthase
217174_s_at	3.22e-18	2.2e-19	13.4879	33.4862	0.895396	APC2	APC2, WNT signaling pathway regulator
203538_at	3.23e-18	2.2e-19	13.4869	33.4831	1.38696	CAMLG	calcium modulating ligand
211012_s_at	3.24e-18	2.21e-19	13.4855	33.4784	0.832011	PML	promyelocytic leukemia
210101_x_at	3.25e-18	2.22e-19	13.4849	33.4766	1.24817	SH3GLB1	SH3 domain containing GRB2 like endophilin B1
216783_at	3.29e-18	2.25e-19	-13.481	33.4637	-1.63458
213556_at	3.34e-18	2.28e-19	-13.4761	33.4478	-0.747969	PINLYP	phospholipase A2 inhibitor and LY6/PLAUR domain containing
205875_s_at	3.35e-18	2.3e-19	13.4742	33.4417	0.89572	ATRIP///TREX1	ATR interacting protein///three prime repair exonuclease 1
200757_s_at	3.35e-18	2.3e-19	13.4742	33.4414	1.32094	CALU	calumenin
210094_s_at	3.38e-18	2.32e-19	13.4711	33.4314	1.09775	PARD3	par-3 family cell polarity regulator
210196_s_at	3.39e-18	2.33e-19	-13.4699	33.4277	-2.35209	PSG1	pregnancy specific beta-1-glycoprotein 1
217461_x_at	3.44e-18	2.37e-19	-13.4652	33.4121	-1.66715	BTF3P12	basic transcription factor 3 pseudogene 12
215411_s_at	3.51e-18	2.41e-19	13.4589	33.3916	1.54127	TRAF3IP2	TRAF3 interacting protein 2
220647_s_at	3.51e-18	2.42e-19	13.4587	33.3911	1.72919	COA4	cytochrome c oxidase assembly factor 4 homolog
208500_x_at	3.51e-18	2.42e-19	-13.4584	33.3902	-1.12376	FOXD3	forkhead box D3
209574_s_at	3.52e-18	2.43e-19	13.4575	33.3871	1.36846	LDLRAD4	low density lipoprotein receptor class A domain containing 4
206927_s_at	3.55e-18	2.45e-19	-13.4545	33.3772	-0.857465	GUCY1A2	guanylate cyclase 1 soluble subunit alpha 2
211004_s_at	3.64e-18	2.51e-19	13.4468	33.3521	1.46964	ALDH3B1	aldehyde dehydrogenase 3 family member B1
222105_s_at	3.67e-18	2.53e-19	13.4441	33.3435	0.86129	NKIRAS2	NFKB inhibitor interacting Ras like 2
211838_x_at	3.7e-18	2.56e-19	13.4412	33.3341	0.937461	PCDHA5	protocadherin alpha 5
218274_s_at	3.71e-18	2.56e-19	13.4404	33.3312	1.27167	ANKZF1	ankyrin repeat and zinc finger domain containing 1
204139_x_at	3.75e-18	2.6e-19	-13.4365	33.3185	-1.10989	MZF1	myeloid zinc finger 1
205545_x_at	3.75e-18	2.6e-19	13.4365	33.3185	0.780156	DNAJC8	DnaJ heat shock protein family (Hsp40) member C8
210369_at	3.76e-18	2.6e-19	13.436	33.3169	1.36858	SWAP70	SWAP switching B-cell complex 70kDa subunit
218904_s_at	3.76e-18	2.6e-19	-13.4359	33.3166	-1.28867	C9orf40	chromosome 9 open reading frame 40
202848_s_at	3.78e-18	2.62e-19	13.4333	33.3081	0.599711	GRK6	G protein-coupled receptor kinase 6
202795_x_at	3.86e-18	2.68e-19	13.4271	33.2879	1.0421	TRIOBP	TRIO and F-actin binding protein
210824_at	3.9e-18	2.71e-19	-13.4235	33.2761	-0.896648
213892_s_at	3.92e-18	2.72e-19	13.4219	33.2711	1.46908	APRT	adenine phosphoribosyltransferase
218955_at	3.93e-18	2.73e-19	13.4207	33.2672	0.687696	BRF2	BRF2, RNA polymerase III transcription initiation factor 50 kDa subunit
203185_at	3.93e-18	2.74e-19	13.4204	33.2659	0.980521	RASSF2	Ras association domain family member 2
221780_s_at	3.95e-18	2.74e-19	13.4193	33.2623	0.794752	DDX27	DEAD-box helicase 27
216744_at	3.96e-18	2.75e-19	-13.4183	33.2591	-1.1772
210659_at	4.02e-18	2.8e-19	13.4131	33.2421	1.2683	CMKLR1	chemerin chemokine-like receptor 1
214800_x_at	4.04e-18	2.81e-19	13.4115	33.237	1.12568	BTF3	basic transcription factor 3
203694_s_at	4.07e-18	2.84e-19	13.4092	33.2296	0.61687	DHX16	DEAH-box helicase 16
207697_x_at	4.09e-18	2.86e-19	13.4071	33.2226	1.08769	LILRB2	leukocyte immunoglobulin like receptor B2
201757_at	4.1e-18	2.86e-19	13.4063	33.2201	1.11466	RPL10///NDUFS5	ribosomal protein L10///NADH:ubiquinone oxidoreductase subunit S5
200670_at	4.13e-18	2.89e-19	13.4036	33.2111	1.36692	XBP1	X-box binding protein 1
34858_at	4.17e-18	2.91e-19	13.4009	33.2022	0.675072	KCTD2	potassium channel tetramerization domain containing 2
200098_s_at	4.26e-18	2.98e-19	13.3936	33.1786	1.06277	ANAPC5	anaphase promoting complex subunit 5
51176_at	4.29e-18	3e-19	13.3914	33.1713	0.802821	MED27	mediator complex subunit 27
212869_x_at	4.34e-18	3.04e-19	13.3879	33.1597	0.64286	LOC101928826///TPT1	uncharacterized LOC101928826///tumor protein, translationally-controlled 1
213864_s_at	4.35e-18	3.05e-19	13.387	33.157	1.43563	NAP1L1	nucleosome assembly protein 1 like 1
202329_at	4.35e-18	3.05e-19	13.3868	33.1561	1.31927	CSK	c-src tyrosine kinase
208725_at	4.36e-18	3.06e-19	13.3859	33.1531	0.518623	EIF2S2	eukaryotic translation initiation factor 2 subunit beta
214078_at	4.4e-18	3.09e-19	13.3825	33.1422	2.35612	PAK3	p21 (RAC1) activated kinase 3
AFFX-M27830_3_at	4.54e-18	3.19e-19	13.373	33.111	0.662502
218097_s_at	4.54e-18	3.19e-19	13.3726	33.1097	0.978607	CUEDC2	CUE domain containing 2
205558_at	4.55e-18	3.2e-19	13.3718	33.107	0.764511	TRAF6	TNF receptor associated factor 6
221652_s_at	4.55e-18	3.2e-19	13.3716	33.1064	1.1158	ASUN	asunder, spermatogenesis regulator
201379_s_at	4.6e-18	3.24e-19	13.3682	33.0955	1.32699	TPD52L2	tumor protein D52 like 2
212579_at	4.61e-18	3.25e-19	13.367	33.0913	1.75351	SMCHD1	structural maintenance of chromosomes flexible hinge domain containing 1
210398_x_at	4.76e-18	3.36e-19	-13.3572	33.0592	-1.45495	FUT6	fucosyltransferase 6
202116_at	5.09e-18	3.59e-19	13.3363	32.991	0.933658	DPF2	double PHD fingers 2
209906_at	5.2e-18	3.67e-19	13.3297	32.9691	1.43696	C3AR1	complement component 3a receptor 1
209764_at	5.27e-18	3.73e-19	-13.325	32.9539	-1.15304	MGAT3	mannosyl (beta-1,4-)-glycoprotein beta-1,4-N-acetylglucosaminyltransferase
219721_at	5.31e-18	3.76e-19	-13.3226	32.9459	-1.22844
214445_at	5.33e-18	3.77e-19	-13.3214	32.9421	-0.907977	ELL2	elongation factor for RNA polymerase II 2
211121_s_at	5.5e-18	3.89e-19	13.3117	32.9103	0.957344	DOK1	docking protein 1
217347_at	5.57e-18	3.95e-19	13.3071	32.895	1.33717
211942_x_at	5.57e-18	3.95e-19	13.307	32.8949	1.15197	RPL13AP5///RPL13AP6///SNORD32A///SNORD33///SNORD34///SNORD35A///RPL13A	ribosomal protein L13a pseudogene 5///ribosomal protein L13a pseudogene 6///small nucleolar RNA, C/D box 32A///small nucleolar RNA, C/D box 33///small nucleolar RNA, C/D box 34///small nucleolar RNA, C/D box 35A///ribosomal protein L13a
221729_at	5.63e-18	3.99e-19	13.304	32.8849	2.0846	COL5A2	collagen type V alpha 2 chain
204383_at	5.67e-18	4.02e-19	13.3016	32.8771	0.986747	TSSK2///DGCR14	testis specific serine kinase 2///DiGeorge syndrome critical region gene 14
204553_x_at	5.82e-18	4.13e-19	13.2934	32.8503	0.850605	INPP4A	inositol polyphosphate-4-phosphatase type I A
212917_x_at	5.84e-18	4.15e-19	13.2921	32.846	1.40364	RECQL	RecQ like helicase
222248_s_at	5.86e-18	4.17e-19	-13.2906	32.8411	-1.15894	SIRT4	sirtuin 4
214612_x_at	5.97e-18	4.25e-19	-13.2848	32.8221	-1.70445	MAGEA6	MAGE family member A6
214150_x_at	6.13e-18	4.37e-19	13.2766	32.7948	1.32613	ATP6V0E1	ATPase H+ transporting V0 subunit e1
217965_s_at	6.14e-18	4.38e-19	13.2757	32.7919	1.1838	SAP30BP	SAP30 binding protein
219506_at	6.17e-18	4.4e-19	13.2739	32.7863	1.28199	C1orf54	chromosome 1 open reading frame 54
201088_at	6.29e-18	4.49e-19	13.2679	32.7664	1.48835	KPNA2	karyopherin subunit alpha 2
209448_at	6.32e-18	4.51e-19	13.2664	32.7614	2.00407	HTATIP2	HIV-1 Tat interactive protein 2
201406_at	6.34e-18	4.53e-19	13.265	32.7569	1.2543	RPL36A-HNRNPH2///RPL36A	RPL36A-HNRNPH2 readthrough///ribosomal protein L36a
214718_at	6.4e-18	4.58e-19	13.2622	32.7477	1.57174	GATAD1	GATA zinc finger domain containing 1
215634_at	6.44e-18	4.61e-19	-13.26	32.7405	-1.48393
217789_at	6.48e-18	4.64e-19	13.258	32.734	1.13139	SNX6	sorting nexin 6
207438_s_at	6.5e-18	4.66e-19	13.2569	32.7303	1.23106	SNUPN	snurportin 1
221008_s_at	6.6e-18	4.73e-19	-13.2517	32.7133	-1.61324	ETNPPL	ethanolamine-phosphate phospho-lyase
206338_at	6.71e-18	4.81e-19	-13.2466	32.6963	-1.14575	ELAVL3	ELAV like neuron-specific RNA binding protein 3
201184_s_at	6.87e-18	4.93e-19	13.2395	32.673	0.724153	CHD4	chromodomain helicase DNA binding protein 4
207571_x_at	6.92e-18	4.97e-19	13.237	32.6648	1.67813	THEMIS2	thymocyte selection associated family member 2
213108_at	6.96e-18	5e-19	-13.2347	32.6574	-1.02859	CAMK2A	calcium/calmodulin dependent protein kinase II alpha
215647_at	7.06e-18	5.08e-19	-13.2303	32.6429	-2.2051
218767_at	7.13e-18	5.13e-19	13.2273	32.633	0.744475	REXO4	REX4 homolog, 3'-5' exonuclease
218243_at	7.14e-18	5.14e-19	13.2266	32.6307	1.09129	RUFY1	RUN and FYVE domain containing 1
215994_x_at	7.2e-18	5.18e-19	13.224	32.6219	1.01923	TBC1D9B	TBC1 domain family member 9B
216046_at	7.34e-18	5.29e-19	13.2176	32.6011	0.645553
213241_at	7.34e-18	5.3e-19	13.2174	32.6005	1.02165	PLXNC1	plexin C1
211675_s_at	7.41e-18	5.35e-19	13.2144	32.5904	1.20814	MDFIC	MyoD family inhibitor domain containing
200677_at	7.58e-18	5.48e-19	13.2073	32.5669	1.29417	PTTG1IP	pituitary tumor-transforming 1 interacting protein
218076_s_at	7.7e-18	5.56e-19	13.2024	32.551	0.964302	ARHGAP17	Rho GTPase activating protein 17
212998_x_at	7.84e-18	5.67e-19	13.1965	32.5313	2.87988	LOC101060835///HLA-DQB1	HLA class II histocompatibility antigen, DQ beta 1 chain-like///major histocompatibility complex, class II, DQ beta 1
200860_s_at	7.96e-18	5.76e-19	13.1916	32.5153	0.99874	CNOT1	CCR4-NOT transcription complex subunit 1
203696_s_at	7.97e-18	5.77e-19	13.1913	32.5142	0.901102	RFC2	replication factor C subunit 2
219807_x_at	7.99e-18	5.79e-19	13.1903	32.511	0.819977	MIA-RAB4B///RAB4B	MIA-RAB4B readthrough (NMD candidate)///RAB4B, member RAS oncogene family
212682_s_at	8.09e-18	5.87e-19	13.1861	32.4971	0.789541	LMF2	lipase maturation factor 2
208642_s_at	8.1e-18	5.87e-19	13.1858	32.4963	0.933002	XRCC5	X-ray repair cross complementing 5
218777_at	8.2e-18	5.95e-19	13.1818	32.4831	1.07316	REEP4	receptor accessory protein 4
78495_at	8.21e-18	5.96e-19	13.1812	32.4809	1.03362	ZNF783	zinc finger family member 783
221002_s_at	8.21e-18	5.97e-19	13.1809	32.48	1.04363	TSPAN14	tetraspanin 14
212701_at	8.25e-18	6e-19	-13.1793	32.4748	-1.18865	TLN2	talin 2
212967_x_at	8.48e-18	6.17e-19	13.1709	32.447	1.37885	NAP1L1	nucleosome assembly protein 1 like 1
49111_at	8.57e-18	6.24e-19	13.1674	32.4355	0.850235	ARRB1	arrestin beta 1
220991_s_at	8.64e-18	6.3e-19	-13.1646	32.4262	-1.69289	RNF32	ring finger protein 32
220666_at	8.64e-18	6.3e-19	-13.1644	32.4258	-1.99537
200817_x_at	8.75e-18	6.39e-19	13.1603	32.4121	1.03876	RPS10	ribosomal protein S10
200725_x_at	8.78e-18	6.41e-19	13.1593	32.4087	1.24977	SNORA70///RPL10	small nucleolar RNA, H/ACA box 70///ribosomal protein L10
200645_at	8.8e-18	6.43e-19	13.1582	32.4051	0.986761	GABARAP	GABA type A receptor-associated protein
207326_at	8.88e-18	6.49e-19	-13.1555	32.3963	-4.01411	BTC	betacellulin
200009_at	9e-18	6.58e-19	13.1509	32.3812	1.10523	GDI2	GDP dissociation inhibitor 2
200013_at	9e-18	6.58e-19	13.1509	32.3811	1.01468	RPL24	ribosomal protein L24
203065_s_at	9.21e-18	6.75e-19	13.1436	32.3568	2.3237	CAV1	caveolin 1
39835_at	9.36e-18	6.86e-19	13.1385	32.3402	1.09457	SBF1	SET binding factor 1
207943_x_at	9.36e-18	6.86e-19	13.1383	32.3394	2.01775	PLAGL1	PLAG1 like zinc finger 1
205020_s_at	9.46e-18	6.94e-19	13.135	32.3284	0.972213	ARL4A	ADP ribosylation factor like GTPase 4A
221435_x_at	9.54e-18	7e-19	13.1322	32.3195	1.49496	HYI	hydroxypyruvate isomerase (putative)
215737_x_at	9.62e-18	7.07e-19	13.1294	32.3101	0.778065	USF2	upstream transcription factor 2, c-fos interacting
203558_at	9.62e-18	7.07e-19	13.1294	32.31	1.06637	CUL7	cullin 7
215942_s_at	9.66e-18	7.1e-19	-13.1278	32.3049	-1.22522	GTSE1	G2 and S-phase expressed 1
205298_s_at	9.78e-18	7.2e-19	13.1237	32.2914	1.07566	BTN2A2	butyrophilin subfamily 2 member A2
64438_at	9.82e-18	7.23e-19	13.1226	32.2875	0.768277	OGFOD3	2-oxoglutarate and iron dependent oxygenase domain containing 3
209732_at	9.88e-18	7.28e-19	13.1204	32.2803	1.97588	CLEC2B	C-type lectin domain family 2 member B
203295_s_at	9.9e-18	7.29e-19	-13.1197	32.278	-0.991224	ATP1A2	ATPase Na+/K+ transporting subunit alpha 2
202656_s_at	1.02e-17	7.55e-19	13.1091	32.2431	1.35762	SERTAD2	SERTA domain containing 2
204990_s_at	1.03e-17	7.61e-19	13.1068	32.2355	1.18102	ITGB4	integrin subunit beta 4
205483_s_at	1.04e-17	7.68e-19	13.1039	32.2259	2.35895	ISG15	ISG15 ubiquitin-like modifier
214784_x_at	1.07e-17	7.9e-19	13.0956	32.1983	1.06946	XPO6	exportin 6
200831_s_at	1.07e-17	7.93e-19	13.0942	32.1939	1.22828	SCD	stearoyl-CoA desaturase
64474_g_at	1.08e-17	8e-19	13.0915	32.1847	0.666598	MIR1306///DGCR8	microRNA 1306///DGCR8 microprocessor complex subunit
41577_at	1.09e-17	8.04e-19	-13.0902	32.1803	-1.30932	PPP1R16B	protein phosphatase 1 regulatory subunit 16B
218441_s_at	1.09e-17	8.11e-19	13.0874	32.1711	0.617804	RPAP1	RNA polymerase II associated protein 1
219348_at	1.09e-17	8.11e-19	13.0873	32.171	0.834343	USE1	unconventional SNARE in the ER 1
212204_at	1.1e-17	8.14e-19	13.0863	32.1675	1.33902	TMEM87A	transmembrane protein 87A
217727_x_at	1.1e-17	8.19e-19	13.0845	32.1615	1.01722	VPS35	VPS35 retromer complex component
201477_s_at	1.11e-17	8.24e-19	13.0825	32.1551	1.45884	RRM1	ribonucleotide reductase catalytic subunit M1
209122_at	1.11e-17	8.25e-19	13.0821	32.1537	2.51366	PLIN2	perilipin 2
218912_at	1.12e-17	8.3e-19	13.0805	32.1484	0.613198	GCC1	GRIP and coiled-coil domain containing 1
211956_s_at	1.12e-17	8.31e-19	13.0799	32.1463	0.970555	EIF1	eukaryotic translation initiation factor 1
203949_at	1.12e-17	8.32e-19	-13.0795	32.145	-1.521	MPO	myeloperoxidase
201720_s_at	1.14e-17	8.49e-19	13.0733	32.1246	2.19298	LAPTM5	lysosomal protein transmembrane 5
45714_at	1.14e-17	8.5e-19	13.0733	32.1245	1.41704	HCFC1R1	host cell factor C1 regulator 1
201939_at	1.14e-17	8.52e-19	13.0725	32.1218	2.41057	PLK2	polo like kinase 2
216480_x_at	1.15e-17	8.6e-19	-13.0697	32.1127	-1.27521	MLLT10	myeloid/lymphoid or mixed-lineage leukemia; translocated to, 10
203453_at	1.15e-17	8.61e-19	-13.0693	32.1115	-2.71383	SCNN1A	sodium channel epithelial 1 alpha subunit
201103_x_at	1.15e-17	8.62e-19	13.0687	32.1093	1.04657	NBPF20///NBPF10///NBPF8///NBPF9///NBPF15///NBPF11///NBPF12///NBPF14	neuroblastoma breakpoint family member 20///neuroblastoma breakpoint family member 10///neuroblastoma breakpoint family member 8///neuroblastoma breakpoint family member 9///neuroblastoma breakpoint family member 15///neuroblastoma breakpoint family member 11///neuroblastoma breakpoint family member 12///neuroblastoma breakpoint family member 14
210908_s_at	1.17e-17	8.73e-19	13.065	32.0972	1.30644	PFDN5	prefoldin subunit 5
205934_at	1.17e-17	8.75e-19	-13.0645	32.0953	-2.04243	PLCL1	phospholipase C like 1
219613_s_at	1.17e-17	8.75e-19	13.0641	32.0942	0.625076	SIRT6	sirtuin 6
219666_at	1.17e-17	8.76e-19	13.0639	32.0934	1.17348	MS4A6A	membrane spanning 4-domains A6A
214456_x_at	1.17e-17	8.8e-19	13.0625	32.0889	2.86756	SAA2///SAA1	serum amyloid A2///serum amyloid A1
209789_at	1.18e-17	8.83e-19	-13.0616	32.0859	-1.48496	CORO2B	coronin 2B
207939_x_at	1.18e-17	8.87e-19	13.0603	32.0816	0.887877	RNPS1	RNA binding protein with serine rich domain 1
220212_s_at	1.18e-17	8.88e-19	13.06	32.0804	0.717443	THADA	THADA, armadillo repeat containing
200048_s_at	1.18e-17	8.88e-19	13.0599	32.0803	1.06205	JTB	jumping translocation breakpoint
217840_at	1.18e-17	8.89e-19	13.0595	32.079	1.73879	DDX41	DEAD-box helicase 41
202726_at	1.18e-17	8.89e-19	13.0594	32.0787	0.783113	LIG1	DNA ligase 1
207783_x_at	1.19e-17	8.93e-19	13.0582	32.0745	0.626632	HUWE1	HECT, UBA and WWE domain containing 1, E3 ubiquitin protein ligase
214799_at	1.19e-17	8.93e-19	-13.0581	32.0742	-1.32436	NFASC	neurofascin
212457_at	1.2e-17	9.02e-19	13.0549	32.0636	1.14293	TFE3	transcription factor binding to IGHM enhancer 3
204267_x_at	1.2e-17	9.04e-19	13.0544	32.0618	0.73013	PKMYT1	protein kinase, membrane associated tyrosine/threonine 1
203510_at	1.21e-17	9.12e-19	13.0517	32.0531	2.05207	MET	MET proto-oncogene, receptor tyrosine kinase
206818_s_at	1.21e-17	9.16e-19	-13.0504	32.0486	-1.04387	CNNM2	cyclin and CBS domain divalent metal cation transport mediator 2
211036_x_at	1.22e-17	9.2e-19	13.0489	32.0438	0.712348	ANAPC5	anaphase promoting complex subunit 5
206723_s_at	1.23e-17	9.27e-19	13.0468	32.0369	1.20077	LPAR2	lysophosphatidic acid receptor 2
222270_at	1.24e-17	9.36e-19	13.0437	32.0265	2.60558	PPP4R3B	protein phosphatase 4 regulatory subunit 3B
212173_at	1.24e-17	9.38e-19	13.0432	32.0248	1.29455	AK2	adenylate kinase 2
217770_at	1.24e-17	9.38e-19	13.0432	32.0248	1.18499	PIGT	phosphatidylinositol glycan anchor biosynthesis class T
212922_s_at	1.24e-17	9.39e-19	13.0428	32.0235	1.1987	SMYD2	SET and MYND domain containing 2
208754_s_at	1.25e-17	9.49e-19	13.0397	32.0131	1.42577	NAP1L1	nucleosome assembly protein 1 like 1
89977_at	1.25e-17	9.51e-19	13.0391	32.0113	1.13385	ACSM5	acyl-CoA synthetase medium-chain family member 5
210447_at	1.26e-17	9.57e-19	13.0372	32.005	1.34519	GLUD2	glutamate dehydrogenase 2
213110_s_at	1.27e-17	9.62e-19	-13.0356	31.9996	-1.72568	COL4A5	collagen type IV alpha 5 chain
202462_s_at	1.27e-17	9.65e-19	13.0344	31.9957	0.647668	DDX46	DEAD-box helicase 46
209683_at	1.32e-17	1e-18	13.0237	31.96	1.73055	FAM49A	family with sequence similarity 49 member A
216388_s_at	1.32e-17	1e-18	13.0236	31.9598	0.814943	LTB4R	leukotriene B4 receptor
218088_s_at	1.34e-17	1.02e-18	13.0187	31.9436	1.18324	RRAGC	Ras related GTP binding C
207953_at	1.35e-17	1.03e-18	13.0158	31.9339	1.62282
208688_x_at	1.35e-17	1.03e-18	13.0144	31.9294	1.35968	EIF3B	eukaryotic translation initiation factor 3 subunit B
219860_at	1.35e-17	1.03e-18	13.014	31.9279	0.798667	LY6G5C	lymphocyte antigen 6 complex, locus G5C
214365_at	1.36e-17	1.04e-18	-13.0131	31.9249	-0.854387	TPM3	tropomyosin 3
216366_x_at	1.36e-17	1.04e-18	13.013	31.9246	0.674812
211725_s_at	1.36e-17	1.04e-18	13.0124	31.9227	1.23829	BID	BH3 interacting domain death agonist
204563_at	1.37e-17	1.05e-18	13.0094	31.9126	1.0979	SELL	selectin L
205912_at	1.38e-17	1.05e-18	13.0078	31.9075	1.30664	PNLIP	pancreatic lipase
210723_x_at	1.39e-17	1.06e-18	13.0056	31.9003	0.915586
219559_at	1.4e-17	1.07e-18	13.0033	31.8926	0.729309	SLC17A9	solute carrier family 17 member 9
207719_x_at	1.4e-17	1.07e-18	13.0032	31.892	0.998169	CEP170P1///CEP170	centrosomal protein 170 pseudogene 1///centrosomal protein 170
218561_s_at	1.4e-17	1.07e-18	13.0027	31.8904	0.812511	LYRM4	LYR motif containing 4
201440_at	1.42e-17	1.09e-18	12.9977	31.874	0.811711	DDX23	DEAD-box helicase 23
220204_s_at	1.43e-17	1.09e-18	-12.9965	31.8698	-1.13282	BMP8A	bone morphogenetic protein 8a
212900_at	1.43e-17	1.1e-18	12.9952	31.8656	1.21448	SEC24A	SEC24 homolog A, COPII coat complex component
212049_at	1.49e-17	1.15e-18	12.9819	31.8213	0.79113	WIPF2	WAS/WASL interacting protein family member 2
218611_at	1.5e-17	1.15e-18	12.9808	31.8179	1.11024	IER5	immediate early response 5
213597_s_at	1.5e-17	1.15e-18	12.9807	31.8173	1.28451	CTDSPL	CTD small phosphatase like
201994_at	1.5e-17	1.16e-18	12.9794	31.8133	1.00691	MORF4L2	mortality factor 4 like 2
208728_s_at	1.51e-17	1.16e-18	12.9786	31.8103	0.918338	CDC42	cell division cycle 42
219162_s_at	1.53e-17	1.18e-18	12.974	31.7951	0.813024	MRPL11	mitochondrial ribosomal protein L11
218145_at	1.53e-17	1.18e-18	12.974	31.795	2.51302	TRIB3	tribbles pseudokinase 3
218126_at	1.53e-17	1.18e-18	12.973	31.7918	0.644913	RMDN3	regulator of microtubule dynamics 3
200095_x_at	1.54e-17	1.19e-18	12.9713	31.7861	1.03815	RPS10	ribosomal protein S10
201506_at	1.55e-17	1.2e-18	12.9695	31.7803	3.43946	TGFBI	transforming growth factor beta induced
202443_x_at	1.56e-17	1.21e-18	12.9665	31.7703	1.24455	NOTCH2	notch 2
210330_at	1.57e-17	1.21e-18	12.9657	31.7675	3.01721	SGCD	sarcoglycan delta
216738_at	1.6e-17	1.24e-18	-12.9582	31.7426	-1.26483
32032_at	1.61e-17	1.25e-18	12.9571	31.7388	0.795179	TSSK2///DGCR14	testis specific serine kinase 2///DiGeorge syndrome critical region gene 14
218007_s_at	1.61e-17	1.25e-18	12.9567	31.7376	1.22264	RPS27L	ribosomal protein S27 like
218317_x_at	1.62e-17	1.25e-18	12.9554	31.7332	1.08145	SLX1A///SLX1B	SLX1 homolog A, structure-specific endonuclease subunit///SLX1 homolog B, structure-specific endonuclease subunit
221698_s_at	1.64e-17	1.28e-18	12.95	31.7155	1.73705	CLEC7A	C-type lectin domain family 7 member A
204117_at	1.66e-17	1.29e-18	12.9468	31.7048	0.627343	PREP	prolyl endopeptidase
201257_x_at	1.67e-17	1.3e-18	12.9452	31.6994	0.70428	SNORD73A///RPS3A	small nucleolar RNA, C/D box 73A///ribosomal protein S3A
202648_at	1.67e-17	1.3e-18	12.9446	31.6973	0.998391	TCF3	transcription factor 3
204372_s_at	1.68e-17	1.31e-18	12.943	31.6922	1.2839	KHSRP	KH-type splicing regulatory protein
202332_at	1.68e-17	1.31e-18	12.9424	31.6899	1.60746	LOC400927-CSNK1E///CSNK1E	LOC400927-CSNK1E readthrough///casein kinase 1 epsilon
31807_at	1.69e-17	1.32e-18	12.9404	31.6834	0.752058	DDX49	DEAD-box helicase 49
220781_at	1.69e-17	1.32e-18	12.9399	31.6818	1.11586	2024-12-01	deleted in esophageal cancer 1
204767_s_at	1.71e-17	1.34e-18	12.9361	31.6692	1.56593	FEN1	flap structure-specific endonuclease 1
213369_at	1.72e-17	1.34e-18	12.9344	31.6634	1.42318	CDHR1	cadherin related family member 1
219309_at	1.74e-17	1.36e-18	12.9317	31.6543	0.891649	C22orf46	chromosome 22 open reading frame 46
217872_at	1.77e-17	1.38e-18	12.9264	31.6367	0.940339	PIH1D1	PIH1 domain containing 1
221746_at	1.77e-17	1.38e-18	12.926	31.6356	1.14189	UBL4A	ubiquitin like 4A
210629_x_at	1.77e-17	1.39e-18	12.9248	31.6314	1.34884	LST1	leukocyte specific transcript 1
212561_at	1.78e-17	1.39e-18	12.9229	31.6253	1.22532	DENND5A	DENN domain containing 5A
208296_x_at	1.79e-17	1.4e-18	12.9216	31.6208	1.74741	TNFAIP8	TNF alpha induced protein 8
203644_s_at	1.81e-17	1.42e-18	12.9179	31.6085	0.628107	MON1B	MON1 homolog B, secretory trafficking associated
204159_at	1.82e-17	1.43e-18	12.9162	31.6029	1.41982	CDKN2C	cyclin dependent kinase inhibitor 2C
205873_at	1.83e-17	1.43e-18	12.9154	31.6002	0.745591	PIGL	phosphatidylinositol glycan anchor biosynthesis class L
207766_at	1.83e-17	1.43e-18	-12.9148	31.5982	-0.961376	CDKL1	cyclin dependent kinase like 1
200901_s_at	1.84e-17	1.44e-18	12.9124	31.5902	1.00454	M6PR///PHC1	mannose-6-phosphate receptor, cation dependent///polyhomeotic homolog 1
218537_at	1.84e-17	1.45e-18	12.9121	31.5892	1.4036	HCFC1R1	host cell factor C1 regulator 1
212852_s_at	1.85e-17	1.45e-18	12.9103	31.5833	1.06612	TROVE2	TROVE domain family member 2
210075_at	1.87e-17	1.47e-18	12.9073	31.5732	0.950439	2024-03-02	membrane associated ring-CH-type finger 2
218460_at	1.87e-17	1.47e-18	12.907	31.5721	0.982503	DNAAF5	dynein axonemal assembly factor 5
201770_at	1.87e-17	1.47e-18	12.9069	31.5718	0.987486	SNRPA	small nuclear ribonucleoprotein polypeptide A
206169_x_at	1.92e-17	1.51e-18	-12.8993	31.5466	-2.41153	ZC3H7B	zinc finger CCCH-type containing 7B
204007_at	1.92e-17	1.51e-18	12.8989	31.5451	2.0381	FCGR3B	Fc fragment of IgG receptor IIIb
215934_at	1.92e-17	1.51e-18	-12.8986	31.5441	-1.21327
202180_s_at	1.93e-17	1.52e-18	12.8968	31.5381	1.32874	MVP	major vault protein
202041_s_at	1.94e-17	1.53e-18	12.8955	31.5338	0.949118	FIBP	FGF1 intracellular binding protein
208923_at	1.96e-17	1.55e-18	12.892	31.5221	1.07802	CYFIP1	cytoplasmic FMR1 interacting protein 1
213414_s_at	1.99e-17	1.57e-18	12.8866	31.5041	2.01258	RPS19	ribosomal protein S19
218571_s_at	1.99e-17	1.58e-18	12.8861	31.5025	0.876971	CHMP4A///TM9SF1	charged multivesicular body protein 4A///transmembrane 9 superfamily member 1
39650_s_at	1.99e-17	1.58e-18	12.8859	31.5019	0.689363	PCNX2	pecanex homolog 2 (Drosophila)
202644_s_at	2.03e-17	1.6e-18	12.881	31.4854	1.80181	TNFAIP3	TNF alpha induced protein 3
221644_s_at	2.04e-17	1.62e-18	-12.8783	31.4766	-1.271	SLC45A2	solute carrier family 45 member 2
221539_at	2.05e-17	1.62e-18	12.8769	31.4717	1.85032	EIF4EBP1	eukaryotic translation initiation factor 4E binding protein 1
216380_x_at	2.05e-17	1.63e-18	12.8763	31.4697	1.44331
212145_at	2.06e-17	1.63e-18	12.875	31.4656	0.848434	MRPS27	mitochondrial ribosomal protein S27
201180_s_at	2.08e-17	1.65e-18	12.8729	31.4585	1.07345	GNAI3	G protein subunit alpha i3
219117_s_at	2.08e-17	1.65e-18	12.8726	31.4576	2.11407	FKBP11	FK506 binding protein 11
214090_at	2.08e-17	1.65e-18	-12.872	31.4554	-1.26557	PAWR	pro-apoptotic WT1 regulator
217763_s_at	2.08e-17	1.66e-18	12.8711	31.4523	1.86676	RAB31	RAB31, member RAS oncogene family
213356_x_at	2.13e-17	1.69e-18	12.8647	31.4309	0.705243	HNRNPA1P33///HNRNPA1P10///HNRNPA1L2///HNRNPA1	heterogeneous nuclear ribonucleoprotein A1 pseudogene 33///heterogeneous nuclear ribonucleoprotein A1 pseudogene 10///heterogeneous nuclear ribonucleoprotein A1-like 2///heterogeneous nuclear ribonucleoprotein A1
212447_at	2.14e-17	1.7e-18	12.8633	31.4264	0.857354	KBTBD2	kelch repeat and BTB domain containing 2
213608_s_at	2.14e-17	1.7e-18	12.8629	31.4251	0.970437	SRRD	SRR1 domain containing
207691_x_at	2.15e-17	1.71e-18	12.8611	31.419	1.19291	ENTPD1	ectonucleoside triphosphate diphosphohydrolase 1
200058_s_at	2.15e-17	1.72e-18	12.8602	31.4162	0.947447	LOC101929240///SNRNP200	U5 small nuclear ribonucleoprotein 200 kDa helicase pseudogene///small nuclear ribonucleoprotein U5 subunit 200
218714_at	2.16e-17	1.72e-18	12.8598	31.4149	0.831109	PRR14	proline rich 14
218305_at	2.16e-17	1.72e-18	12.8595	31.4139	0.611376	IPO4	importin 4
209901_x_at	2.16e-17	1.72e-18	12.8595	31.4136	1.09938	AIF1	allograft inflammatory factor 1
211787_s_at	2.16e-17	1.72e-18	12.8591	31.4124	1.74802	LOC101928634///SENP3-EIF4A1///SNORD10///SNORA48///SNORA67///EIF4A1	uncharacterized LOC101928634///SENP3-EIF4A1 readthrough (NMD candidate)///small nucleolar RNA, C/D box 10///small nucleolar RNA, H/ACA box 48///small nucleolar RNA, H/ACA box 67///eukaryotic translation initiation factor 4A1
212953_x_at	2.17e-17	1.73e-18	12.8575	31.4069	1.12208	CALR	calreticulin
219321_at	2.17e-17	1.74e-18	-12.8568	31.4048	-1.43527	MPP5	membrane palmitoylated protein 5
221688_s_at	2.18e-17	1.75e-18	12.8552	31.3992	0.997425	IMP3	IMP3, U3 small nucleolar ribonucleoprotein
219457_s_at	2.2e-17	1.76e-18	12.8522	31.3895	0.998184	RIN3	Ras and Rab interactor 3
217606_at	2.21e-17	1.77e-18	12.8506	31.3841	0.799538
47083_at	2.22e-17	1.78e-18	12.8501	31.3822	0.660063	C7orf26	chromosome 7 open reading frame 26
214574_x_at	2.22e-17	1.78e-18	12.8489	31.3784	1.22498	LST1	leukocyte specific transcript 1
214770_at	2.22e-17	1.78e-18	12.8487	31.3778	2.12979	MSR1	macrophage scavenger receptor 1
212039_x_at	2.23e-17	1.79e-18	12.8473	31.3729	0.782565	SNORD83B///SNORD139///RPL3	small nucleolar RNA, C/D box 83B///small nucleolar RNA, C/D box 139///ribosomal protein L3
202144_s_at	2.25e-17	1.81e-18	12.8448	31.3647	1.03308	ADSL	adenylosuccinate lyase
215330_at	2.25e-17	1.81e-18	-12.8443	31.3631	-2.41116
204593_s_at	2.26e-17	1.82e-18	12.8432	31.3594	0.647401	MIEF1	mitochondrial elongation factor 1
202934_at	2.26e-17	1.82e-18	12.843	31.3587	2.75001	HK2	hexokinase 2
203284_s_at	2.27e-17	1.83e-18	12.8411	31.3524	1.20041	HS2ST1	heparan sulfate 2-O-sulfotransferase 1
201064_s_at	2.27e-17	1.83e-18	12.8406	31.3507	1.23114	LOC100996696///PABPC4	polyadenylate-binding protein 4 pseudogene///poly(A) binding protein cytoplasmic 4
212639_x_at	2.29e-17	1.85e-18	12.8382	31.3425	1.8755	TUBA1B	tubulin alpha 1b
207066_at	2.32e-17	1.87e-18	12.8345	31.3301	0.649485	HRC	histidine rich calcium binding protein
215671_at	2.34e-17	1.89e-18	12.8315	31.3201	1.77799	PDE4B	phosphodiesterase 4B
208960_s_at	2.34e-17	1.89e-18	12.831	31.3184	2.3505	KLF6	Kruppel like factor 6
200066_at	2.39e-17	1.93e-18	12.8255	31.3	1.04983	IK	IK cytokine, down-regulator of HLA II
209729_at	2.4e-17	1.94e-18	12.8236	31.294	0.851196	GAS2L1	growth arrest specific 2 like 1
216078_at	2.41e-17	1.95e-18	-12.8224	31.2898	-1.12237
213603_s_at	2.44e-17	1.97e-18	12.8186	31.277	1.60352	RAC2	ras-related C3 botulinum toxin substrate 2 (rho family, small GTP binding protein Rac2)
218496_at	2.46e-17	1.99e-18	12.816	31.2684	0.792326	RNASEH1	ribonuclease H1
200094_s_at	2.47e-17	2e-18	12.814	31.2618	0.986499	EEF2	eukaryotic translation elongation factor 2
209467_s_at	2.48e-17	2.01e-18	12.8127	31.2574	0.77874	MKNK1	MAP kinase interacting serine/threonine kinase 1
209762_x_at	2.49e-17	2.02e-18	12.8114	31.2532	1.20777	SP110	SP110 nuclear body protein
201608_s_at	2.53e-17	2.05e-18	12.8061	31.2355	1.11157	PWP1	PWP1 homolog, endonuclein
211447_s_at	2.54e-17	2.06e-18	-12.8055	31.2331	-1.06181	PDE4A	phosphodiesterase 4A
211284_s_at	2.54e-17	2.07e-18	12.8044	31.2296	1.51453	GRN	granulin
65884_at	2.55e-17	2.07e-18	12.8032	31.2257	1.26951	MAN1B1	mannosidase alpha class 1B member 1
209517_s_at	2.55e-17	2.08e-18	12.8031	31.2252	0.569154	ASH2L	ASH2 like histone lysine methyltransferase complex subunit
212015_x_at	2.58e-17	2.1e-18	12.7994	31.2128	1.06559	MIR4745///PTBP1	microRNA 4745///polypyrimidine tract binding protein 1
213290_at	2.61e-17	2.12e-18	12.7963	31.2024	0.909894	COL6A2	collagen type VI alpha 2 chain
212024_x_at	2.61e-17	2.13e-18	12.7954	31.1996	0.815362	FLII	FLII, actin remodeling protein
218426_s_at	2.63e-17	2.14e-18	12.7937	31.194	0.67314	RNF216	ring finger protein 216
214205_x_at	2.64e-17	2.15e-18	12.7927	31.1903	1.10019	GLRX3	glutaredoxin 3
203800_s_at	2.66e-17	2.17e-18	12.7899	31.181	0.847541	MRPS14	mitochondrial ribosomal protein S14
212663_at	2.66e-17	2.17e-18	12.7898	31.1806	0.718723	FKBP15	FK506 binding protein 15
209437_s_at	2.67e-17	2.18e-18	12.7885	31.1764	1.3108	SPON1	spondin 1
202686_s_at	2.68e-17	2.19e-18	12.7865	31.1698	1.5225	AXL	AXL receptor tyrosine kinase
206688_s_at	2.71e-17	2.21e-18	12.7839	31.1609	0.810732	CPSF4	cleavage and polyadenylation specific factor 4
200674_s_at	2.75e-17	2.25e-18	12.7792	31.1452	0.894593	RPL32	ribosomal protein L32
216648_s_at	2.75e-17	2.25e-18	-12.7785	31.1429	-0.973694	RREB1	ras responsive element binding protein 1
202911_at	2.78e-17	2.28e-18	12.7748	31.1305	1.07615	MSH6	mutS homolog 6
200802_at	2.79e-17	2.28e-18	12.7742	31.1285	1.11408	SARS	seryl-tRNA synthetase
205068_s_at	2.79e-17	2.29e-18	12.7733	31.1255	0.980162	ARHGAP26	Rho GTPase activating protein 26
201191_at	2.87e-17	2.36e-18	12.7647	31.0968	0.599355	PITPNA	phosphatidylinositol transfer protein alpha
202567_at	2.9e-17	2.38e-18	12.7621	31.088	0.993932	SNRPD3	small nuclear ribonucleoprotein D3 polypeptide
218648_at	2.9e-17	2.38e-18	12.7618	31.0869	0.942879	CRTC3	CREB regulated transcription coactivator 3
206343_s_at	2.9e-17	2.38e-18	-12.7615	31.0859	-1.86562	NRG1	neuregulin 1
208981_at	2.9e-17	2.38e-18	12.7613	31.0853	1.57922	PECAM1	platelet and endothelial cell adhesion molecule 1
219959_at	2.92e-17	2.41e-18	12.7587	31.0766	1.66551	MOCOS	molybdenum cofactor sulfurase
209950_s_at	2.94e-17	2.42e-18	12.7573	31.0719	0.824281	VILL	villin like
218417_s_at	3.02e-17	2.49e-18	-12.7482	31.0414	-1.15104	SLC48A1	solute carrier family 48 member 1
220157_x_at	3.02e-17	2.49e-18	-12.7482	31.0413	-1.08696	PLEKHA8P1	pleckstrin homology domain containing A8 pseudogene 1
204924_at	3.07e-17	2.53e-18	12.7432	31.0247	1.28023	TLR2	toll like receptor 2
206365_at	3.12e-17	2.57e-18	-12.7389	31.0102	-1.61106	XCL1	X-C motif chemokine ligand 1
41113_at	3.13e-17	2.58e-18	-12.7375	31.0056	-0.883975	ZNF500	zinc finger protein 500
222192_s_at	3.15e-17	2.6e-18	-12.7352	30.9978	-0.825375	LDAH	lipid droplet associated hydrolase
211521_s_at	3.19e-17	2.64e-18	12.7308	30.9832	0.630245	CYTH4	cytohesin 4
200036_s_at	3.2e-17	2.64e-18	12.7303	30.9812	1.05735	RPL10A	ribosomal protein L10a
212860_at	3.28e-17	2.71e-18	12.7229	30.9566	0.836525	ZDHHC18	zinc finger DHHC-type containing 18
208833_s_at	3.3e-17	2.73e-18	12.7202	30.9475	0.699919	ATXN10	ataxin 10
202009_at	3.34e-17	2.76e-18	12.717	30.9366	0.917263	TWF2	twinfilin actin binding protein 2
201723_s_at	3.36e-17	2.78e-18	12.7149	30.9296	1.05997	GALNT1	polypeptide N-acetylgalactosaminyltransferase 1
212768_s_at	3.41e-17	2.82e-18	-12.7104	30.9145	-2.24019	OLFM4	olfactomedin 4
201356_at	3.44e-17	2.85e-18	12.7078	30.9059	0.673398	SF3A1	splicing factor 3a subunit 1
201061_s_at	3.48e-17	2.88e-18	12.7042	30.8939	1.28008	STOM	stomatin
217885_at	3.5e-17	2.9e-18	12.7024	30.8877	1.04481	IPO9	importin 9
205649_s_at	3.53e-17	2.93e-18	12.6992	30.877	3.15543	FGA	fibrinogen alpha chain
208878_s_at	3.56e-17	2.96e-18	12.6966	30.8684	1.40486	PAK2	p21 (RAC1) activated kinase 2
209474_s_at	3.6e-17	2.99e-18	12.6931	30.8566	1.38983	ENTPD1	ectonucleoside triphosphate diphosphohydrolase 1
202333_s_at	3.6e-17	3e-18	12.6925	30.8544	1.15441	UBE2B	ubiquitin conjugating enzyme E2 B
211582_x_at	3.62e-17	3.01e-18	12.6914	30.8509	1.18739	LST1	leukocyte specific transcript 1
200840_at	3.63e-17	3.02e-18	12.6903	30.8472	1.2473	KARS	lysyl-tRNA synthetase
201336_at	3.69e-17	3.08e-18	12.6848	30.8287	1.05422	VAMP3	vesicle associated membrane protein 3
200061_s_at	3.69e-17	3.08e-18	12.6845	30.8276	0.831328	RPS24	ribosomal protein S24
211073_x_at	3.7e-17	3.08e-18	12.6841	30.8263	0.788589	SNORD83B///SNORD139///RPL3	small nucleolar RNA, C/D box 83B///small nucleolar RNA, C/D box 139///ribosomal protein L3
220279_at	3.72e-17	3.11e-18	-12.6818	30.8184	-1.05859	TRIM17	tripartite motif containing 17
208459_s_at	3.74e-17	3.12e-18	12.6805	30.8141	1.04733	XPO7	exportin 7
203100_s_at	3.82e-17	3.19e-18	-12.6742	30.7929	-0.993095	CDYL	chromodomain Y-like
208270_s_at	3.82e-17	3.19e-18	12.674	30.7923	1.06657	RNPEP	arginyl aminopeptidase
211964_at	3.82e-17	3.19e-18	12.6738	30.7915	1.90307	COL4A2	collagen type IV alpha 2 chain
203167_at	3.87e-17	3.24e-18	12.6694	30.7769	1.03631	TIMP2	TIMP metallopeptidase inhibitor 2
211152_s_at	3.88e-17	3.24e-18	12.6689	30.775	0.568808	HTRA2	HtrA serine peptidase 2
221766_s_at	3.89e-17	3.26e-18	12.6675	30.7704	1.06576	FAM46A	family with sequence similarity 46 member A
218768_at	3.91e-17	3.28e-18	12.6661	30.7657	1.10729	NUP107	nucleoporin 107
210109_at	3.93e-17	3.29e-18	12.6645	30.7602	0.681258	SND1-IT1	SND1 intronic transcript 1
202474_s_at	3.93e-17	3.3e-18	12.6642	30.7592	1.26522	HCFC1	host cell factor C1
41037_at	3.96e-17	3.32e-18	12.6617	30.7508	1.26213	TEAD4	TEA domain transcription factor 4
203518_at	4.02e-17	3.38e-18	12.6568	30.7344	0.788658	LYST	lysosomal trafficking regulator
208697_s_at	4.04e-17	3.4e-18	12.6551	30.7288	1.06755	EIF3E	eukaryotic translation initiation factor 3 subunit E
209473_at	4.06e-17	3.41e-18	12.6539	30.7246	1.33096	ENTPD1	ectonucleoside triphosphate diphosphohydrolase 1
209949_at	4.13e-17	3.47e-18	12.6486	30.7067	1.16363	NCF2	neutrophil cytosolic factor 2
220933_s_at	4.14e-17	3.48e-18	12.6475	30.7033	1.07793	ZCCHC6	zinc finger CCHC-type containing 6
209534_x_at	4.17e-17	3.51e-18	12.645	30.6948	0.941832	AKAP13	A-kinase anchoring protein 13
208436_s_at	4.21e-17	3.55e-18	12.6421	30.685	2.07808	IRF7	interferon regulatory factor 7
203554_x_at	4.22e-17	3.56e-18	12.6411	30.6817	1.25052	PTTG1	pituitary tumor-transforming 1
44669_at	4.22e-17	3.56e-18	12.6408	30.6806	0.778676	SDHAF1	succinate dehydrogenase complex assembly factor 1
212411_at	4.23e-17	3.57e-18	12.6403	30.6788	1.0397	IMP4	IMP4 homolog, U3 small nucleolar ribonucleoprotein
208422_at	4.3e-17	3.63e-18	-12.6352	30.6619	-1.02951	MSR1	macrophage scavenger receptor 1
219419_at	4.33e-17	3.66e-18	12.6331	30.6546	0.623687	RBFA	ribosome binding factor A (putative)
221999_at	4.34e-17	3.67e-18	12.6321	30.6512	0.635036	VRK3	vaccinia related kinase 3
218514_at	4.35e-17	3.68e-18	12.6313	30.6488	0.738063	SMG8	SMG8, nonsense mediated mRNA decay factor
209734_at	4.36e-17	3.69e-18	12.6306	30.6461	0.926439	NCKAP1L	NCK associated protein 1 like
215482_s_at	4.42e-17	3.74e-18	12.6263	30.6316	0.719764	EIF2B4	eukaryotic translation initiation factor 2B subunit delta
205516_x_at	4.43e-17	3.75e-18	12.6255	30.6291	0.829126	CIZ1	CDKN1A interacting zinc finger protein 1
203459_s_at	4.44e-17	3.77e-18	12.6243	30.6251	0.896902	VPS16	VPS16, CORVET/HOPS core subunit
214773_x_at	4.47e-17	3.79e-18	12.6226	30.6194	0.879146	TIPRL	TOR signaling pathway regulator
218999_at	4.48e-17	3.8e-18	12.6219	30.6168	1.67238	TMEM140	transmembrane protein 140
210268_at	4.48e-17	3.8e-18	-12.6216	30.6158	-1.12665	NFX1	nuclear transcription factor, X-box binding 1
208329_at	4.57e-17	3.88e-18	-12.6155	30.5955	-1.46646	PBOV1	prostate and breast cancer overexpressed 1
215223_s_at	4.59e-17	3.9e-18	12.614	30.5904	2.49527	LOC100129518///SOD2	uncharacterized LOC100129518///superoxide dismutase 2, mitochondrial
208659_at	4.72e-17	4.01e-18	12.6054	30.5613	1.65901	CLIC1	chloride intracellular channel 1
206129_s_at	4.74e-17	4.04e-18	-12.6036	30.5554	-0.978891	ARSB	arylsulfatase B
219524_s_at	4.78e-17	4.07e-18	-12.6013	30.5476	-0.849331	NDUFAF5	NADH:ubiquinone oxidoreductase complex assembly factor 5
208549_x_at	4.83e-17	4.12e-18	12.5976	30.5352	1.27858	PTMA	prothymosin, alpha
202306_at	4.93e-17	4.2e-18	12.5918	30.5155	1.1009	POLR2G	RNA polymerase II subunit G
220968_s_at	4.93e-17	4.2e-18	12.5915	30.5144	0.869533	TSPAN9	tetraspanin 9
41397_at	4.98e-17	4.25e-18	12.5885	30.5043	0.542583	ZNF821	zinc finger protein 821
220056_at	5.01e-17	4.28e-18	12.5861	30.4963	0.758623	IL22RA1	interleukin 22 receptor subunit alpha 1
201003_x_at	5.07e-17	4.33e-18	12.5827	30.4849	1.09569	TMEM189-UBE2V1///TMEM189///UBE2V2///UBE2V1	TMEM189-UBE2V1 readthrough///transmembrane protein 189///ubiquitin conjugating enzyme E2 V2///ubiquitin conjugating enzyme E2 V1
209575_at	5.07e-17	4.33e-18	12.5823	30.4836	1.37991	IL10RB	interleukin 10 receptor subunit beta
212429_s_at	5.09e-17	4.35e-18	12.581	30.479	0.735251	GTF3C2	general transcription factor IIIC subunit 2
215044_s_at	5.17e-17	4.42e-18	-12.5766	30.4642	-0.990458	STAM2	signal transducing adaptor molecule 2
201426_s_at	5.21e-17	4.45e-18	12.5741	30.4559	2.52815	VIM	vimentin
220879_at	5.23e-17	4.48e-18	-12.5727	30.4509	-0.736472
200057_s_at	5.23e-17	4.48e-18	12.5726	30.4507	0.92843	NONO	non-POU domain containing, octamer-binding
209871_s_at	5.23e-17	4.49e-18	12.5721	30.449	1.46366	APBA2	amyloid beta precursor protein binding family A member 2
212028_at	5.26e-17	4.51e-18	12.5704	30.4434	0.909799	RBM25	RNA binding motif protein 25
208012_x_at	5.34e-17	4.58e-18	12.5656	30.4271	0.996638	SP110	SP110 nuclear body protein
208640_at	5.39e-17	4.63e-18	12.5629	30.418	0.998347	RAC1	ras-related C3 botulinum toxin substrate 1 (rho family, small GTP binding protein Rac1)
213877_x_at	5.5e-17	4.72e-18	12.5568	30.3975	0.656195	TCEB2	transcription elongation factor B subunit 2
200651_at	5.5e-17	4.73e-18	12.5564	30.3959	1.54355	SNORD96A///SNORD95///RACK1	small nucleolar RNA, C/D box 96A///small nucleolar RNA, C/D box 95///receptor for activated C kinase 1
218022_at	5.58e-17	4.8e-18	12.5522	30.3817	0.654746	VRK3	vaccinia related kinase 3
204396_s_at	5.58e-17	4.8e-18	12.5517	30.3803	1.6531	GRK5	G protein-coupled receptor kinase 5
209199_s_at	5.59e-17	4.81e-18	12.5514	30.3792	1.34527	MEF2C	myocyte enhancer factor 2C
217880_at	5.6e-17	4.82e-18	12.5506	30.3764	1.03651	CDC27	cell division cycle 27
210073_at	5.61e-17	4.83e-18	12.5499	30.3739	1.72417	ST8SIA1	ST8 alpha-N-acetyl-neuraminide alpha-2,8-sialyltransferase 1
209008_x_at	5.66e-17	4.88e-18	12.5471	30.3645	2.08591	KRT8	keratin 8
201153_s_at	5.66e-17	4.89e-18	12.5466	30.363	1.46962	MBNL1	muscleblind like splicing regulator 1
219400_at	5.69e-17	4.91e-18	12.5454	30.3587	1.1507	CNTNAP1	contactin associated protein 1
208709_s_at	5.71e-17	4.93e-18	12.5438	30.3535	0.752935	NRDC	nardilysin convertase
220813_at	5.72e-17	4.94e-18	-12.5432	30.3513	-1.26792	CYSLTR2	cysteinyl leukotriene receptor 2
207538_at	5.75e-17	4.97e-18	12.5414	30.3452	1.42938	IL4	interleukin 4
222050_at	5.75e-17	4.97e-18	-12.5413	30.3449	-1.05018
217649_at	5.77e-17	5e-18	-12.54	30.3406	-2.35433	ZFAND5	zinc finger AN1-type containing 5
221696_s_at	5.81e-17	5.03e-18	-12.538	30.3338	-3.44887	STYK1	serine/threonine/tyrosine kinase 1
208809_s_at	5.84e-17	5.06e-18	12.5364	30.3283	1.3232	C6orf62	chromosome 6 open reading frame 62
200016_x_at	5.87e-17	5.09e-18	12.5346	30.3222	0.744891	HNRNPA1P10///HNRNPA1	heterogeneous nuclear ribonucleoprotein A1 pseudogene 10///heterogeneous nuclear ribonucleoprotein A1
206219_s_at	5.87e-17	5.09e-18	12.5344	30.3217	1.03829	VAV1	vav guanine nucleotide exchange factor 1
213173_at	5.9e-17	5.11e-18	-12.5329	30.3167	-0.885039	PCNX1	pecanex homolog 1 (Drosophila)
209946_at	5.94e-17	5.16e-18	12.5304	30.3083	1.04012	VEGFC	vascular endothelial growth factor C
210260_s_at	5.97e-17	5.18e-18	12.529	30.3033	1.97521	TNFAIP8	TNF alpha induced protein 8
219368_at	5.97e-17	5.18e-18	-12.529	30.3033	-2.74482	NAP1L2	nucleosome assembly protein 1 like 2
213829_x_at	6.04e-17	5.25e-18	12.5253	30.2908	0.740714	RTEL1	regulator of telomere elongation helicase 1
200814_at	6.04e-17	5.26e-18	12.5249	30.2895	1.08939	PSME1	proteasome activator subunit 1
218061_at	6.07e-17	5.29e-18	12.5232	30.2838	1.2328	MEA1	male-enhanced antigen 1
218081_at	6.08e-17	5.29e-18	12.5227	30.282	1.21057	C20orf27	chromosome 20 open reading frame 27
207704_s_at	6.12e-17	5.33e-18	12.5205	30.2746	1.18121	GAS7	growth arrest specific 7
218023_s_at	6.12e-17	5.34e-18	12.5203	30.2741	0.985639	FAM53C	family with sequence similarity 53 member C
202626_s_at	6.13e-17	5.35e-18	12.5197	30.272	1.43477	LYN	LYN proto-oncogene, Src family tyrosine kinase
222038_s_at	6.13e-17	5.35e-18	-12.5196	30.2717	-1.09231	UTP18	UTP18, small subunit processome component
219732_at	6.18e-17	5.39e-18	-12.5173	30.2638	-2.19102	PLPPR1	phospholipid phosphatase related 1
212054_x_at	6.18e-17	5.39e-18	12.5172	30.2635	1.02515	TBC1D9B	TBC1 domain family member 9B
222024_s_at	6.2e-17	5.41e-18	12.5161	30.2597	1.03773	AKAP13	A-kinase anchoring protein 13
203416_at	6.2e-17	5.42e-18	12.5156	30.2581	1.44686	CD53	CD53 molecule
202690_s_at	6.23e-17	5.45e-18	12.5141	30.253	1.5339	SNRPD1	small nuclear ribonucleoprotein D1 polypeptide
205847_at	6.29e-17	5.5e-18	-12.5112	30.2434	-0.876497	PRSS22	protease, serine 22
200687_s_at	6.41e-17	5.61e-18	12.5055	30.2239	0.776625	SF3B3	splicing factor 3b subunit 3
201543_s_at	6.51e-17	5.7e-18	12.5006	30.2074	1.03995	SAR1A	secretion associated Ras related GTPase 1A
212155_at	6.52e-17	5.72e-18	12.4998	30.2045	1.46052	RNF187	ring finger protein 187
205936_s_at	6.53e-17	5.72e-18	12.4994	30.2035	0.695386	HK3	hexokinase 3
210568_s_at	6.54e-17	5.73e-18	12.499	30.2018	1.12075	RECQL	RecQ like helicase
216367_at	6.59e-17	5.78e-18	12.4965	30.1933	1.0019	COL4A3	collagen type IV alpha 3 chain
216321_s_at	6.59e-17	5.78e-18	12.4964	30.1931	1.37171	NR3C1	nuclear receptor subfamily 3 group C member 1
204328_at	6.64e-17	5.83e-18	12.494	30.1849	1.11907	TMC6	transmembrane channel like 6
214797_s_at	6.64e-17	5.84e-18	12.4937	30.1841	2.32318	CDK18	cyclin dependent kinase 18
221615_at	6.76e-17	5.95e-18	-12.488	30.1648	-1.23801	BMP8B	bone morphogenetic protein 8b
206590_x_at	6.78e-17	5.97e-18	-12.4871	30.1615	-0.893693	DRD2	dopamine receptor D2
207754_at	6.78e-17	5.97e-18	-12.4868	30.1608	-1.18489	RASSF8	Ras association domain family member 8
221058_s_at	6.78e-17	5.97e-18	12.4868	30.1605	1.54081	CKLF	chemokine like factor
201991_s_at	6.81e-17	6e-18	12.4852	30.1552	0.916635	KIF5B	kinesin family member 5B
202822_at	6.81e-17	6.01e-18	12.485	30.1546	1.20691	LPP	LIM domain containing preferred translocation partner in lipoma
220974_x_at	6.93e-17	6.11e-18	12.48	30.1376	1.06449	SFXN3	sideroflexin 3
216348_at	6.95e-17	6.13e-18	12.479	30.1343	1.25419
205241_at	7.02e-17	6.2e-18	12.4756	30.1227	1.32243	SCO2	SCO2 cytochrome c oxidase assembly protein
217226_s_at	7.05e-17	6.23e-18	12.4743	30.1184	1.2672	SFXN3	sideroflexin 3
209702_at	7.14e-17	6.31e-18	12.4706	30.1058	1.6427	FTO	fat mass and obesity associated
221991_at	7.21e-17	6.38e-18	12.4674	30.0948	1.21618	NXPH3	neurexophilin 3
216154_at	7.46e-17	6.6e-18	-12.4569	30.0594	-1.24201
214837_at	7.49e-17	6.63e-18	-12.4556	30.0549	-2.40371	ALB	albumin
209200_at	7.5e-17	6.64e-18	12.4552	30.0535	1.11623	MEF2C	myocyte enhancer factor 2C
213347_x_at	7.65e-17	6.77e-18	12.4493	30.0337	0.911201	RPS4X	ribosomal protein S4, X-linked
214780_s_at	7.91e-17	7.01e-18	12.4393	29.9995	0.76252	MYO9B	myosin IXB
221588_x_at	7.94e-17	7.04e-18	-12.4379	29.9947	-2.48675	ALDH6A1	aldehyde dehydrogenase 6 family member A1
212977_at	7.97e-17	7.07e-18	12.4366	29.9905	2.61515	ACKR3	atypical chemokine receptor 3
215390_at	8.09e-17	7.19e-18	-12.4319	29.9744	-1.20213
202796_at	8.12e-17	7.22e-18	12.4306	29.9702	1.7337	SYNPO	synaptopodin
200011_s_at	8.15e-17	7.25e-18	12.4293	29.9658	0.705658	ARF3	ADP ribosylation factor 3
210406_s_at	8.3e-17	7.38e-18	12.424	29.9476	0.930892	WTH3DI///RAB6C///RAB6A	RAB6C-like///RAB6C, member RAS oncogene family///RAB6A, member RAS oncogene family
210512_s_at	8.4e-17	7.47e-18	12.4204	29.9354	1.98952	VEGFA	vascular endothelial growth factor A
217346_at	8.43e-17	7.5e-18	-12.4191	29.9312	-0.930472
211970_x_at	8.45e-17	7.52e-18	12.4183	29.9284	0.827631	ACTG1///ACTB	actin gamma 1///actin beta
201302_at	8.55e-17	7.62e-18	12.4146	29.9158	1.94032	ANXA4	annexin A4
217947_at	8.64e-17	7.71e-18	12.4111	29.904	1.13714	CMTM6	CKLF like MARVEL transmembrane domain containing 6
205930_at	8.72e-17	7.78e-18	12.4082	29.8943	0.897673	GTF2E1	general transcription factor IIE subunit 1
207093_s_at	8.72e-17	7.79e-18	-12.4081	29.8937	-0.832519	LOC101927057///OMG	uncharacterized LOC101927057///oligodendrocyte myelin glycoprotein
217650_x_at	8.74e-17	7.81e-18	12.4073	29.8912	1.21357	ST3GAL2	ST3 beta-galactoside alpha-2,3-sialyltransferase 2
211370_s_at	8.77e-17	7.83e-18	12.4063	29.8878	0.667678	MAP2K5	mitogen-activated protein kinase kinase 5
209476_at	8.79e-17	7.86e-18	12.4055	29.8848	0.959382	TMX1	thioredoxin related transmembrane protein 1
218117_at	8.95e-17	8e-18	12.4	29.8661	1.14073	RBX1	ring-box 1
204366_s_at	8.95e-17	8.01e-18	12.3997	29.8652	0.681296	GTF3C2	general transcription factor IIIC subunit 2
204929_s_at	8.99e-17	8.05e-18	12.3981	29.8599	1.49502	VAMP5	vesicle associated membrane protein 5
200683_s_at	9.04e-17	8.09e-18	12.3966	29.8547	0.717604	UBE2L3	ubiquitin conjugating enzyme E2 L3
209165_at	9.41e-17	8.44e-18	12.3843	29.8128	1.02408	AATF	apoptosis antagonizing transcription factor
210895_s_at	9.41e-17	8.44e-18	12.3842	29.8126	1.15053	CD86	CD86 molecule
203320_at	9.44e-17	8.46e-18	12.3834	29.8097	1.30245	SH2B3	SH2B adaptor protein 3
203508_at	9.59e-17	8.61e-18	12.3784	29.7929	1.41933	TNFRSF1B	TNF receptor superfamily member 1B
[truncated: 20,266 more rows]

## Sheet: Table.S1B
GSE76351.top
ID	adj.P.Val	P.Value	t	B	logFC	Gene.symbol	Gene.title
7955290	3.32e-23	1.43e-27	-57.6	51.2194	-4.92	AQP2	aquaporin 2
8028963	3.32e-23	2.04e-27	-56.7	50.9385	-5.94	CYP2B6	cytochrome P450 family 2 subfamily B member 6
7952617	3.32e-23	2.99e-27	-55.8	50.6376	-5.06	KCNJ1	potassium voltage-gated channel subfamily J member 1
8084668	2.6e-22	3.12e-26	-50.7	48.7386	-4.75	HRG	histidine rich glycoprotein
8016646	4.88e-21	7.33e-25	44.5	46.0637	3.78	COL1A1	collagen type I alpha 1 chain
7995868	1.14e-20	2.06e-24	-42.6	45.1619	-6.02	SLC12A3	solute carrier family 12 member 3
8069795	1.23e-20	2.59e-24	-42.2	44.9596	-6.32	CLDN8	claudin 8
7922627	1.4e-20	3.35e-24	-41.7	44.731	-6.64	NPHS2	NPHS2, podocin
8066757	4.54e-20	1.33e-23	-39.4	43.5055	-6.13	SLC13A3	solute carrier family 13 member 3
7976488	4.54e-20	1.49e-23	-39.2	43.4025	-5.13	SERPINA5	serpin family A member 5
8035083	4.54e-20	1.61e-23	-39.1	43.3292	-5.82	CYP4F2	cytochrome P450 family 4 subfamily F member 2
7948937	4.54e-20	1.63e-23	-39.1	43.3169	-6.34	SLC22A8	solute carrier family 22 member 8
7948920	5.69e-20	2.22e-23	-38.6	43.0392	-5.88	SLC22A6	solute carrier family 22 member 6
7901565	1.4e-19	5.88e-23	-37.1	42.1551	-6.45	DIO1	deiodinase, iodothyronine type I
8054872	2.81e-19	1.27e-22	-35.9	41.4514	-4.48	TFCP2L1	transcription factor CP2-like 1
7995222	3.3e-19	1.59e-22	-35.5	41.2457	-4.07	C16orf58///SLC5A2	chromosome 16 open reading frame 58///solute carrier family 5 member 2
7953936	4.12e-19	2.11e-22	-35.1	40.9839	-6.13	TMEM52B	transmembrane protein 52B
8042537	6.12e-19	3.31e-22	-34.5	40.5648	-3.88	ATP6V1B1	ATPase H+ transporting V1 subunit B1
8115287	7.63e-19	4.36e-22	-34.1	40.3096	-6.86	SLC36A2	solute carrier family 36 member 2
8153762	1.69e-18	1.02e-21	-32.9	39.5179	-1.8	SLC39A4	solute carrier family 39 member 4
8107764	2.28e-18	1.44e-21	-32.4	39.1925	-4.53	CTXN3	cortexin 3
8151637	3.57e-18	2.36e-21	-31.8	38.728	-5.42	SLC7A13	solute carrier family 7 member 13
7927155	5.14e-18	3.56e-21	-31.2	38.3376	-3.32	FXYD4	FXYD domain containing ion transport regulator 4
7994058	5.14e-18	3.7e-21	-31.2	38.3015	-4.92	SCNN1G	sodium channel epithelial 1 gamma subunit
7921533	6.65e-18	4.99e-21	-30.8	38.019	-4.02	KCNJ10	potassium voltage-gated channel subfamily J member 10
8110347	7.44e-18	5.81e-21	-30.6	37.8751	-5.91	SLC34A1	solute carrier family 34 member 1
7991283	1.1e-17	9.01e-21	-30	37.4579	-4.05	RHCG	Rh family C glycoprotein
7907572	1.1e-17	9.24e-21	-30	37.4334	-2.65	PAPPA2	pappalysin 2
8045848	1.25e-17	1.09e-20	-29.8	37.2795	-4.72	UPP2	uridine phosphorylase 2
8013364	1.45e-17	1.3e-20	-29.5	37.1052	-4.82	SLC47A2	solute carrier family 47 member 2
8079931	1.56e-17	1.45e-20	-29.4	37.0046	-2.62	SLC38A3	solute carrier family 38 member 3
7916412	1.81e-17	1.76e-20	-29.2	36.8195	-5.24	FAM151A///ACOT11	family with sequence similarity 151 member A///acyl-CoA thioesterase 11
8005879	1.81e-17	1.79e-20	-29.2	36.8002	-5.08	SLC13A2	solute carrier family 13 member 2
8151730	1.93e-17	1.97e-20	-29	36.7085	-7.91	CALB1	calbindin 1
8084679	1.96e-17	2.06e-20	-29	36.6694	-7.08	KNG1	kininogen 1
7936050	1.99e-17	2.15e-20	-28.9	36.6268	-4.75	CYP17A1	cytochrome P450 family 17 subfamily A member 1
7975284	1.99e-17	2.21e-20	-28.9	36.5997	-4.08	RDH12	retinol dehydrogenase 12 (all-trans/9-cis/11-cis)
7967212	2.1e-17	2.46e-20	-28.8	36.497	-6.87	HPD	4-hydroxyphenylpyruvate dioxygenase
8169836	2.1e-17	2.47e-20	-28.8	36.4962	-6.17	XPNPEP2	X-prolyl aminopeptidase 2
8058627	2.42e-17	2.91e-20	-28.6	36.3378	-4.21	ERBB4	erb-b2 receptor tyrosine kinase 4
7965884	3.94e-17	4.85e-20	-28	35.8459	-6.97	PAH	phenylalanine hydroxylase
7993126	4.87e-17	6.15e-20	-27.7	35.6181	-4.36	ABAT	4-aminobutyrate aminotransferase
8106176	5.77e-17	7.45e-20	-27.5	35.4323	-4.93	TMEM174	transmembrane protein 174
8015991	7.38e-17	9.75e-20	-27.1	35.173	-4.15	SLC4A1	solute carrier family 4 member 1 (Diego blood group)
8102587	7.44e-17	1.01e-19	-27.1	35.1426	-5.52	NDNF	neuron derived neurotrophic factor
8123259	8.43e-17	1.16e-19	-26.9	35.0008	-5.78	PLG	plasminogen
8103894	9.13e-17	1.29e-19	-26.8	34.9029	-4.69	ENPP6	ectonucleotide pyrophosphatase/phosphodiesterase 6
7958425	1.16e-16	1.68e-19	-26.5	34.6484	-5.09	DAO	D-amino acid oxidase
7994074	1.27e-16	1.88e-19	-26.4	34.5396	-2.96	SCNN1B	sodium channel epithelial 1 beta subunit
8095628	1.39e-16	2.09e-19	-26.3	34.4346	-5.9	ALB	albumin
8011671	1.47e-16	2.25e-19	-26.2	34.3631	-3.6	GGT6	gamma-glutamyltransferase 6
8147273	1.65e-16	2.58e-19	-26	34.2297	-4.5	LRRC69///SLC26A7	leucine rich repeat containing 69///solute carrier family 26 member 7
7984217	1.66e-16	2.64e-19	26	34.2066	1.45	PLEKHO2	pleckstrin homology domain containing O2
8075838	1.76e-16	2.86e-19	-25.9	34.1306	-4.09	PVALB	parvalbumin
8018761	1.88e-16	3.17e-19	-25.8	34.0306	-2.9	ST6GALNAC2	ST6 N-acetylgalactosaminide alpha-2,6-sialyltransferase 2
8180372	1.88e-16	3.17e-19	-25.8	34.0306	-2.9	ST6GALNAC2	ST6 N-acetylgalactosaminide alpha-2,6-sialyltransferase 2
7970251	2.09e-16	3.58e-19	-25.7	33.9121	-3.86	PROZ	protein Z, vitamin K dependent plasma glycoprotein
7898314	2.27e-16	3.96e-19	-25.6	33.8138	-4.67	CLCNKB	chloride voltage-gated channel Kb
8036155	2.6e-16	4.61e-19	-25.4	33.6657	-4.01	PRODH2	proline dehydrogenase 2
8143221	2.61e-16	4.7e-19	-25.4	33.6457	-5.36	ATP6V0A4	ATPase H+ transporting V0 subunit a4
8134263	3.33e-16	6.11e-19	25.1	33.3908	3.12	COL1A2	collagen type I alpha 2 chain
8135804	3.81e-16	7.09e-19	-25	33.2454	-3.9	ASB15	ankyrin repeat and SOCS box containing 15
8078759	3.82e-16	7.23e-19	-24.9	33.2265	-3.2	SLC22A13	solute carrier family 22 member 13
8095663	4.14e-16	7.99e-19	-24.8	33.1287	-5.39	AFM	afamin
8026456	4.14e-16	8.25e-19	-24.8	33.0975	-4	CYP4F3	cytochrome P450 family 4 subfamily F member 3
7949719	4.14e-16	8.31e-19	-24.8	33.0906	-2.89	PC	pyruvate carboxylase
8050007	4.14e-16	8.32e-19	24.8	33.0886	3.31	PXDN	peroxidasin
8147351	4.49e-16	9.16e-19	-24.7	32.9947	-2.97	ESRP1	epithelial splicing regulatory protein 1
7948982	4.68e-16	9.7e-19	-24.6	32.939	-3.55	HRASLS2	HRAS like suppressor 2
8084788	4.88e-16	1.03e-18	-24.6	32.8838	-6.04	CLDN16	claudin 16
7929664	4.94e-16	1.05e-18	-24.5	32.8585	-3.39	HOGA1	4-hydroxy-2-oxoglutarate aldolase 1
8159627	5.42e-16	1.17e-18	-24.4	32.754	-2.78	SLC34A3	solute carrier family 34 member 3
8027778	5.96e-16	1.31e-18	24.3	32.6469	2.09	LOC100127972///FXYD5	uncharacterized LOC100127972///FXYD domain containing ion transport regulator 5
7898300	5.96e-16	1.33e-18	-24.3	32.6336	-2.97	CLCNKA	chloride voltage-gated channel Ka
7926105	6.03e-16	1.36e-18	-24.3	32.6093	-3	GATA3	GATA binding protein 3
8070467	7.95e-16	1.81e-18	-24	32.3259	-4.48	TMPRSS2	transmembrane protease, serine 2
8140984	8.4e-16	1.94e-18	-23.9	32.2587	-4.48	HEPACAM2	HEPACAM family member 2
7977933	9.14e-16	2.14e-18	-23.8	32.1637	-4.19	SLC7A8	solute carrier family 7 member 8
7912975	9.29e-16	2.2e-18	-23.8	32.1354	-4.46	ALDH4A1	aldehyde dehydrogenase 4 family member A1
7947156	1.15e-15	2.76e-18	-23.5	31.9149	-4.81	MUC15	mucin 15, cell surface associated
8040249	1.22e-15	2.97e-18	-23.5	31.8429	-3.71	ATP6V1C2///PDIA6	ATPase H+ transporting V1 subunit C2///protein disulfide isomerase family A member 6
7906079	1.41e-15	3.48e-18	-23.3	31.6874	-3.1	RAB25	RAB25, member RAS oncogene family
8147145	1.53e-15	3.8e-18	-23.2	31.5987	-5.83	ATP6V0D2	ATPase H+ transporting V0 subunit d2
7909285	1.56e-15	3.94e-18	-23.2	31.5652	-2.63	PFKFB2	6-phosphofructo-2-kinase/fructose-2,6-biphosphatase 2
8002830	1.93e-15	4.93e-18	-23	31.3438	-2.58	LDHD	lactate dehydrogenase D
8059580	2.23e-15	5.76e-18	-22.8	31.1893	-3.01	DNER	delta/notch like EGF repeat containing
8033257	2.64e-15	6.91e-18	22.6	31.0106	3.72	C3	complement component 3
8149774	2.71e-15	7.16e-18	22.6	30.9756	3.56	LOXL2	lysyl oxidase like 2
7983564	2.78e-15	7.42e-18	-22.6	30.9405	-6.62	SLC12A1	solute carrier family 12 member 1
8132465	2.84e-15	7.66e-18	-22.5	30.9085	-3.46	HECW1	HECT, C2 and WW domain containing E3 ubiquitin protein ligase 1
8112202	2.87e-15	7.99e-18	22.5	30.867	3.32	PLK2	polo like kinase 2
8162652	2.87e-15	8e-18	-22.5	30.866	-3.68	CTSV	cathepsin V
7921873	2.87e-15	8.03e-18	22.5	30.8629	3.36	FCGR3B///FCGR3A	Fc fragment of IgG receptor IIIb///Fc fragment of IgG receptor IIIa
8053654	2.87e-15	8.1e-18	-22.5	30.8537	-5.08	PRDM10///FABP1	PR/SET domain 10///fatty acid binding protein 1
7994216	2.89e-15	8.24e-18	-22.5	30.8365	-2.67	SLC5A11	solute carrier family 5 member 11
8019357	4.4e-15	1.27e-17	-22.1	30.4104	-3.26	DCXR	dicarbonyl and L-xylulose reductase
8111490	4.52e-15	1.32e-17	-22	30.3732	-4.31	PRLR	prolactin receptor
8096580	7e-15	2.06e-17	-21.6	29.9314	-3.9	MTTP	microsomal triglyceride transfer protein
7963786	7.04e-15	2.09e-17	21.6	29.9148	3.46	ITGA5	integrin subunit alpha 5
7973530	8.51e-15	2.55e-17	-21.4	29.7178	-3.5	PCK2	phosphoenolpyruvate carboxykinase 2, mitochondrial
7958749	1e-14	3.05e-17	21.2	29.543	1.77	SH2B3	SH2B adaptor protein 3
8034084	1.08e-14	3.31e-17	-21.2	29.46	-2.83	AP1M2	adaptor related protein complex 1 mu 2 subunit
8070194	1.12e-14	3.47e-17	21.1	29.4137	1.88	RUNX1///RUNX1	runt related transcription factor 1///runt related transcription factor 1
7999936	1.12e-14	3.48e-17	-21.1	29.4098	-6.27	UMOD	uromodulin
8043522	1.23e-14	3.89e-17	-21	29.3001	-2.27	PROM2	prominin 2
8156923	1.32e-14	4.19e-17	-21	29.2272	-3.86	PLPPR1	phospholipid phosphatase related 1
7955348	1.35e-14	4.33e-17	-20.9	29.1941	-4.64	GPD1	glycerol-3-phosphate dehydrogenase 1
8083457	1.45e-14	4.7e-17	20.8	29.1135	1.23	RAP2B	RAP2B, member of RAS oncogene family
8010161	1.5e-14	4.91e-17	20.8	29.0684	1.07	2024-09-09	septin 9
8024323	1.58e-14	5.21e-17	-20.8	29.0102	-2.33	REEP6	receptor accessory protein 6
7972890	1.64e-14	5.45e-17	-20.7	28.9655	-1.36	GRTP1	growth hormone regulated TBC protein 1
8042942	1.77e-14	5.95e-17	20.6	28.8776	2.1	HK2	hexokinase 2
8082046	1.77e-14	6.01e-17	-20.6	28.8679	-3.16	CASR	calcium sensing receptor
8109901	1.82e-14	6.24e-17	-20.6	28.8306	-1.88	FOXI1	forkhead box I1
8042701	2.18e-14	7.6e-17	-20.4	28.6355	-2.37	EMX1	empty spiracles homeobox 1
8007154	2.18e-14	7.6e-17	20.4	28.6352	2.71	FKBP10	FK506 binding protein 10
7957167	2.3e-14	8.1e-17	-20.4	28.5713	-1.53	TMEM19	transmembrane protein 19
8043363	2.3e-14	8.2e-17	20.4	28.5593	2.76	MIR4435-2HG///LINC00152	MIR4435-2 host gene///long intergenic non-protein coding RNA 152
7960865	2.3e-14	8.22e-17	20.3	28.5576	3.2	SLC2A3	solute carrier family 2 member 3
7967993	2.35e-14	8.48e-17	-20.3	28.5263	-4.24	FGF9	fibroblast growth factor 9
8008321	2.46e-14	8.93e-17	-20.3	28.4746	-4.21	ACSF2	acyl-CoA synthetase family member 2
8119782	2.58e-14	9.46e-17	-20.2	28.417	-3.74	SLC22A7	solute carrier family 22 member 7
7939314	2.66e-14	9.84e-17	-20.2	28.3777	-4.33	EHF	ETS homologous factor
8156043	2.88e-14	1.07e-16	-20.1	28.2924	-4.21	PSAT1	phosphoserine aminotransferase 1
7903980	2.92e-14	1.1e-16	20.1	28.2691	3.13	C1orf162	chromosome 1 open reading frame 162
7930148	2.97e-14	1.12e-16	-20.1	28.2462	-3.64	SFXN2	sideroflexin 2
8081612	3.03e-14	1.16e-16	-20.1	28.2178	-1.7	ABHD10	abhydrolase domain containing 10
8120335	3.32e-14	1.28e-16	-20	28.1193	-2.61	FAM83B	family with sequence similarity 83 member B
8092836	3.45e-14	1.34e-16	-19.9	28.0731	-3.38	CPN2	carboxypeptidase N subunit 2
8072436	3.71e-14	1.45e-16	-19.9	27.9922	-2.02	INPP5J	inositol polyphosphate-5-phosphatase J
8037005	3.97e-14	1.56e-16	19.8	27.9171	2.23	TGFB1	transforming growth factor beta 1
8103769	4.02e-14	1.59e-16	-19.8	27.8974	-3.62	HPGD	hydroxyprostaglandin dehydrogenase 15-(NAD)
7949679	4.03e-14	1.61e-16	-19.8	27.8865	-3.04	SPTBN2	spectrin beta, non-erythrocytic 2
8120194	4.18e-14	1.68e-16	-19.7	27.8438	-2.34	TFAP2B	transcription factor AP-2 beta
8008900	4.18e-14	1.69e-16	-19.7	27.836	-1.76	CA4	carbonic anhydrase 4
8083494	4.34e-14	1.77e-16	-19.7	27.7919	-2.94	MME	membrane metallo-endopeptidase
7913896	4.45e-14	1.83e-16	-19.7	27.7587	-2.2	SLC30A2	solute carrier family 30 member 2
8015635	4.8e-14	1.99e-16	19.6	27.6764	2.14	PTRF	polymerase I and transcript release factor
8010673	4.81e-14	2.01e-16	-19.6	27.6679	-3.17	SLC25A10	solute carrier family 25 member 10
8054611	4.84e-14	2.04e-16	19.6	27.6534	2.86	MIR4435-2HG///LINC00152	MIR4435-2 host gene///long intergenic non-protein coding RNA 152
8029950	5.53e-14	2.34e-16	19.4	27.5139	2.58	EHD2	EH domain containing 2
8151032	5.72e-14	2.44e-16	-19.4	27.4721	-2.89	GGH	gamma-glutamyl hydrolase
7921882	6.54e-14	2.81e-16	19.3	27.3313	3.56	OLFML2B	olfactomedin like 2B
7937217	6.83e-14	2.95e-16	-19.2	27.2822	-2.32	ECHS1	enoyl-CoA hydratase, short chain 1
8159838	7.7e-14	3.36e-16	-19.1	27.1542	-3.11	C9orf66	chromosome 9 open reading frame 66
8148220	8.06e-14	3.53e-16	-19.1	27.1026	-2.47	FER1L6	fer-1 like family member 6
8092735	9.47e-14	4.2e-16	-19	26.9301	-3.9	TMEM207	transmembrane protein 207
8146092	9.47e-14	4.21e-16	19	26.927	4.15	IDO1	indoleamine 2,3-dioxygenase 1
8106743	9.7e-14	4.34e-16	18.9	26.897	3.99	VCAN	versican
7897877	1.02e-13	4.59e-16	18.9	26.84	2.16	TNFRSF1B	TNF receptor superfamily member 1B
8100853	1.27e-13	5.76e-16	-18.7	26.6138	-4.57	GC	GC, vitamin D binding protein
7903461	1.37e-13	6.23e-16	-18.6	26.5348	-2.17	NTNG1	netrin G1
8033605	1.58e-13	7.26e-16	18.5	26.3818	1.74	MYO1F	myosin IF
8098671	1.63e-13	7.52e-16	-18.5	26.3468	-3.49	F11	coagulation factor XI
8081288	1.82e-13	8.45e-16	18.4	26.2294	2.61	TMEM45A	transmembrane protein 45A
7985159	1.9e-13	8.9e-16	-18.3	26.1783	-2.08	CRABP1	cellular retinoic acid binding protein 1
8012896	1.96e-13	9.23e-16	18.3	26.141	2.18	PMP22	peripheral myelin protein 22
8080168	2.03e-13	9.61e-16	-18.3	26.1009	-3.97	ACY1	aminoacylase 1
8017766	2.25e-13	1.08e-15	-18.2	25.9846	-4.57	APOH	apolipoprotein H
7943998	2.25e-13	1.08e-15	18.2	25.9837	3.89	NNMT	nicotinamide N-methyltransferase
8112920	2.25e-13	1.09e-15	-18.2	25.9745	-1.23	ACOT12	acyl-CoA thioesterase 12
8104074	2.29e-13	1.12e-15	-18.2	25.9508	-3.04	MTNR1A	melatonin receptor 1A
8006005	2.5e-13	1.22e-15	-18.1	25.8587	-4.66	PIPOX	pipecolic acid and sarcosine oxidase
8062041	2.54e-13	1.25e-15	-18.1	25.8364	-1.78	ACSS2	acyl-CoA synthetase short-chain family member 2
8006466	2.74e-13	1.36e-15	-18	25.7537	-1.42
7964535	2.75e-13	1.37e-15	-18	25.7464	-2.24	CYP27B1	cytochrome P450 family 27 subfamily B member 1
8016094	2.84e-13	1.43e-15	18	25.7037	3.15	GJC1	gap junction protein gamma 1
8086961	2.84e-13	1.43e-15	18	25.7006	0.981	PFKFB4	6-phosphofructo-2-kinase/fructose-2,6-biphosphatase 4
8073633	3.15e-13	1.6e-15	-17.9	25.5909	-3.13	PNPLA3	patatin like phospholipase domain containing 3
7952086	3.15e-13	1.61e-15	-17.9	25.5845	-2.46	TREH	trehalase
7972570	3.19e-13	1.64e-15	-17.9	25.5672	-2.56	GGACT	gamma-glutamylamine cyclotransferase
8122744	3.57e-13	1.85e-15	-17.8	25.4459	-3.88	IYD	iodotyrosine deiodinase
8058765	3.62e-13	1.88e-15	17.7	25.4285	3.2	FN1	fibronectin 1
8059905	3.63e-13	1.9e-15	17.7	25.4185	2.86	COL6A3	collagen type VI alpha 3 chain
7950501	3.64e-13	1.91e-15	17.7	25.4107	1.09	GDPD5	glycerophosphodiester phosphodiesterase domain containing 5
8154476	3.71e-13	1.96e-15	-17.7	25.3844	-1.97	SH3GL2	SH3 domain containing GRB2 like 2, endophilin A1
7939738	4.71e-13	2.5e-15	17.5	25.1397	1.83	DDB2	damage specific DNA binding protein 2
8129666	4.72e-13	2.52e-15	-17.5	25.1326	-3.19	SLC2A12	solute carrier family 2 member 12
8038633	5.06e-13	2.73e-15	-17.5	25.0548	-2.27	KLK1	kallikrein 1
8119052	5.06e-13	2.73e-15	-17.5	25.0514	-3.1	PNPLA1	patatin like phospholipase domain containing 1
8009929	5.06e-13	2.75e-15	-17.5	25.045	-1.73	SMIM5	small integral membrane protein 5
7975598	5.11e-13	2.8e-15	-17.4	25.0294	-1.36	ACOT1	acyl-CoA thioesterase 1
7921868	5.36e-13	2.94e-15	17.4	24.9772	2.68	FCGR3B///FCGR3A	Fc fragment of IgG receptor IIIb///Fc fragment of IgG receptor IIIa
7984245	5.49e-13	3.03e-15	-17.4	24.9472	-3.05	SLC51B///RASL12	solute carrier family 51 beta subunit///RAS like family 12
8015827	5.77e-13	3.21e-15	-17.3	24.8911	-1.09	SOST	sclerostin
8016808	6.53e-13	3.65e-15	-17.2	24.762	-2.48	CA10	carbonic anhydrase 10
8125780	6.61e-13	3.71e-15	-17.2	24.7446	-1.28	IP6K3	inositol hexakisphosphate kinase 3
8038577	6.72e-13	3.79e-15	-17.2	24.7221	-2.27	ASPDH	aspartate dehydrogenase domain containing
7941148	6.88e-13	3.9e-15	-17.2	24.6934	-1.78	TM7SF2	transmembrane 7 superfamily member 2
8082673	7.1e-13	4.05e-15	-17.2	24.6565	-3.01	ACPP	acid phosphatase, prostate
8038695	7.22e-13	4.14e-15	-17.1	24.6348	-2.71	KLK7	kallikrein related peptidase 7
8111524	7.48e-13	4.31e-15	-17.1	24.5938	-2.17	UGT3A2	UDP glycosyltransferase family 3 member A2
8150428	1.05e-12	6.09e-15	-16.9	24.2469	-3.9	SFRP1	secreted frizzled related protein 1
7990309	1.07e-12	6.21e-15	-16.8	24.2267	-2.18	STRA6	stimulated by retinoic acid 6
8006681	1.09e-12	6.41e-15	-16.8	24.1949	-2.09	LHX1	LIM homeobox 1
8064790	1.17e-12	6.89e-15	16.8	24.1216	3.34	RASSF2	Ras association domain family member 2
7936115	1.21e-12	7.18e-15	16.7	24.081	1.32	SH3PXD2A	SH3 and PX domains 2A
8048350	1.22e-12	7.25e-15	-16.7	24.0707	-1.88	PLCD4	phospholipase C delta 4
7914270	1.24e-12	7.43e-15	16.7	24.0462	2.83	LAPTM5	lysosomal protein transmembrane 5
8109843	1.24e-12	7.45e-15	16.7	24.0426	2.5	DOCK2	dedicator of cytokinesis 2
8008185	1.34e-12	8.08e-15	16.6	23.962	1.55	ABI3	ABI family member 3
8044080	1.36e-12	8.23e-15	-16.6	23.9424	-2.85	SLC9A2	solute carrier family 9 member A2
8110841	1.37e-12	8.34e-15	16.6	23.9297	2.2	LPCAT1	lysophosphatidylcholine acyltransferase 1
8079966	1.38e-12	8.48e-15	-16.6	23.9123	-2.21	SEMA3B	semaphorin 3B
8141374	1.52e-12	9.33e-15	-16.5	23.8161	-4.69	AZGP1	alpha-2-glycoprotein 1, zinc-binding
8126820	1.52e-12	9.43e-15	-16.5	23.8055	-3.94	ADGRF1	adhesion G protein-coupled receptor F1
8156116	1.53e-12	9.5e-15	-16.5	23.7981	-2.34	IDNK	IDNK, gluconokinase
8125072	1.55e-12	9.68e-15	-16.5	23.7794	-1.04	VWA7	von Willebrand factor A domain containing 7
8170695	1.58e-12	9.93e-15	-16.5	23.754	-1.94	DUSP9	dual specificity phosphatase 9
8096116	1.66e-12	1.05e-14	-16.4	23.6986	-4.67	GPAT3	glycerol-3-phosphate acyltransferase 3
7908694	1.69e-12	1.07e-14	16.4	23.6799	2.03	NAV1	neuron navigator 1
8049737	1.69e-12	1.08e-14	-16.4	23.6718	-2.05	AGXT	alanine-glyoxylate aminotransferase
8007429	1.8e-12	1.15e-14	-16.4	23.6046	-5.04	G6PC	glucose-6-phosphatase catalytic subunit
8036010	1.85e-12	1.19e-14	-16.4	23.5738	-2.62	PEPD	peptidase D
8041570	1.89e-12	1.22e-14	-16.3	23.5468	-2.31	TMEM178A	transmembrane protein 178A
8114805	1.9e-12	1.23e-14	-16.3	23.5379	-3.25	FGF1	fibroblast growth factor 1
7994609	1.94e-12	1.27e-14	-16.3	23.5037	-2.28	QPRT	quinolinate phosphoribosyltransferase
8026139	1.94e-12	1.27e-14	16.3	23.5036	1.12	NFIX	nuclear factor I X
8044067	1.97e-12	1.3e-14	-16.3	23.4841	-3.35	SLC9A4	solute carrier family 9 member A4
8089835	2e-12	1.32e-14	16.3	23.4635	2.42	MIR198///FSTL1	microRNA 198///follistatin like 1
7924309	2.03e-12	1.35e-14	-16.3	23.4453	-3.54	ESRRG	estrogen related receptor gamma
8089729	2.11e-12	1.41e-14	-16.2	23.4034	-2.18	IGSF11	immunoglobulin superfamily member 11
8157300	2.12e-12	1.42e-14	-16.2	23.3947	-1.44	BSPRY	B-box and SPRY domain containing
7953200	2.12e-12	1.43e-14	16.2	23.3863	2.24	CCND2	cyclin D2
8160168	2.12e-12	1.43e-14	-16.2	23.3851	-2.77	FREM1	FRAS1 related extracellular matrix 1
8035050	2.32e-12	1.58e-14	16.2	23.2856	1.42	RASAL3	RAS protein activator like 3
7980098	2.32e-12	1.58e-14	-16.1	23.2837	-3.39	BBOF1///ALDH6A1	basal body orientation factor 1///aldehyde dehydrogenase 6 family member A1
7975268	2.46e-12	1.69e-14	-16.1	23.2186	-2.47	VTI1B///ARG2	vesicle transport through interaction with t-SNAREs 1B///arginase 2
8168274	2.46e-12	1.7e-14	-16.1	23.2145	-1.37	GJB1	gap junction protein beta 1
8114491	2.56e-12	1.77e-14	-16.1	23.1717	-3.9	SLC23A1	solute carrier family 23 member 1
8000117	2.6e-12	1.8e-14	-16.1	23.1534	-1.93	CRYM	crystallin mu
7923596	2.67e-12	1.86e-14	-16	23.1184	-3.78	ETNK2	ethanolamine kinase 2
7983239	2.67e-12	1.88e-14	-16	23.1104	-2.31	CKMT1A///CKMT1B	creatine kinase, mitochondrial 1A///creatine kinase, mitochondrial 1B
7983256	2.67e-12	1.88e-14	-16	23.1104	-2.31	CKMT1A///CKMT1B	creatine kinase, mitochondrial 1A///creatine kinase, mitochondrial 1B
7999727	2.72e-12	1.92e-14	-16	23.0893	-2.63	ABCC6	ATP binding cassette subfamily C member 6
8139207	2.8e-12	1.99e-14	16	23.0519	2.78	INHBA///INHBA	inhibin beta A subunit///inhibin beta A subunit
8135587	2.8e-12	1.99e-14	16	23.0508	2.36	CAV2	caveolin 2
8071861	2.88e-12	2.06e-14	-16	23.0199	-2.4	SUSD2	sushi domain containing 2
8167185	2.92e-12	2.09e-14	15.9	23.002	2.79	TIMP1	TIMP metallopeptidase inhibitor 1
8009145	3e-12	2.16e-14	-15.9	22.9687	-2.53	KCNH6	potassium voltage-gated channel subfamily H member 6
7987439	3.05e-12	2.21e-14	15.9	22.9477	1.42	GPR176	G protein-coupled receptor 176
8072798	3.11e-12	2.26e-14	15.9	22.9228	2	CYTH4	cytohesin 4
8086457	3.19e-12	2.33e-14	-15.9	22.8955	-3.34	CYP8B1	cytochrome P450 family 8 subfamily B member 1
8026300	3.27e-12	2.39e-14	15.9	22.8662	1.73	ADGRE5	adhesion G protein-coupled receptor E5
7997158	3.3e-12	2.43e-14	-15.8	22.8527	-1.43	MARVELD3	MARVEL domain containing 3
7977786	3.49e-12	2.58e-14	-15.8	22.792	-3.47	SLC7A7	solute carrier family 7 member 7
7946142	3.52e-12	2.61e-14	15.8	22.7788	1.86	PRKCDBP	protein kinase C delta binding protein
7903854	3.63e-12	2.7e-14	-15.8	22.7447	-1.38	SLC6A17	solute carrier family 6 member 17
7962930	3.97e-12	2.97e-14	-15.7	22.6499	-1.25	DDN	dendrin
8115076	4.2e-12	3.15e-14	15.7	22.5876	2.05	CSF1R	colony stimulating factor 1 receptor
8114119	4.77e-12	3.6e-14	-15.6	22.4547	-1.45	FSTL4	follistatin like 4
7955908	4.78e-12	3.62e-14	15.6	22.4493	2.69	NCKAP1L	NCK associated protein 1 like
8068684	4.8e-12	3.65e-14	-15.6	22.4405	-3.01	FAM3B	family with sequence similarity 3 member B
8098214	4.93e-12	3.76e-14	15.5	22.4099	1.76	TLL1	tolloid like 1
8105989	5.4e-12	4.14e-14	15.5	22.3139	2.26
8108217	5.4e-12	4.15e-14	15.5	22.3107	3.44	TGFBI	transforming growth factor beta induced
8087433	5.47e-12	4.24e-14	-15.5	22.2894	-0.862	NICN1///AMT	nicolin 1///aminomethyltransferase
7923332	5.47e-12	4.24e-14	-15.5	22.2892	-2	TNNT2	troponin T2, cardiac type
7952927	5.51e-12	4.29e-14	-15.4	22.2772	-1.51	B4GALNT3	beta-1,4-N-acetyl-galactosaminyltransferase 3
8147065	5.53e-12	4.32e-14	-15.4	22.2691	-3.26	RALYL	RALY RNA binding protein-like
8121563	5.53e-12	4.34e-14	15.4	22.2664	1.65	MARCKS	myristoylated alanine rich protein kinase C substrate
8057620	5.64e-12	4.44e-14	15.4	22.2432	2.05	COL5A2	collagen type V alpha 2 chain
7994123	5.66e-12	4.47e-14	-15.4	22.2357	-1.39	CHP2	calcineurin like EF-hand protein 2
7896708	5.84e-12	4.63e-14	15.4	22.2005	3.18
8165406	5.93e-12	4.72e-14	15.4	22.1801	1.2	NPDC1	neural proliferation, differentiation and control 1
8046922	6.23e-12	4.98e-14	15.3	22.1266	2.48	COL3A1	collagen type III alpha 1 chain
7960529	6.26e-12	5.02e-14	-15.3	22.1188	-4.71	SCNN1A	sodium channel epithelial 1 alpha subunit
8032839	6.51e-12	5.24e-14	15.3	22.075	1.8	SEMA6B	semaphorin 6B
7896695	6.6e-12	5.33e-14	15.3	22.0577	1.56
7912659	6.84e-12	5.55e-14	-15.3	22.0167	-4.63	AGMAT	agmatinase
8088866	6.94e-12	5.65e-14	-15.3	21.999	-2.74	CNTN3	contactin 3
8045688	7.43e-12	6.07e-14	15.2	21.9261	5.15	TNFAIP6	TNF alpha induced protein 6
8063337	7.59e-12	6.22e-14	15.2	21.9017	1.19	ZFAS1	ZNFX1 antisense RNA 1
8112649	7.99e-12	6.58e-14	-15.1	21.8452	-2.56	FAM169A	family with sequence similarity 169 member A
7919984	8.59e-12	7.09e-14	-15.1	21.7685	-2.37	SELENBP1	selenium binding protein 1
8066431	8.61e-12	7.13e-14	15.1	21.7629	1.5	ADA	adenosine deaminase
7915910	8.96e-12	7.46e-14	-15.1	21.7183	-1.69	PDZK1IP1	PDZK1 interacting protein 1
7898256	9.03e-12	7.54e-14	-15.1	21.7071	-1.57	TMEM82	transmembrane protein 82
7938925	9.94e-12	8.33e-14	-15	21.6063	-2.65	NELL1	neural EGFL like 1
7947481	1.02e-11	8.54e-14	-15	21.5805	-3.38	ELF5	E74 like ETS transcription factor 5
8140504	1.03e-11	8.73e-14	-15	21.5585	-1.86	MAGI2	membrane associated guanylate kinase, WW and PDZ domain containing 2
8098848	1.07e-11	9.06e-14	-14.9	21.5209	-1.38	SLC26A1///IDUA	solute carrier family 26 member 1///iduronidase, alpha-L-
7995362	1.07e-11	9.09e-14	-14.9	21.5176	-2.07	GPT2	glutamic--pyruvic transaminase 2
8147697	1.08e-11	9.24e-14	-14.9	21.5018	-2.22	GRHL2	grainyhead like transcription factor 2
7950555	1.12e-11	9.58e-14	14.9	21.4647	1.8	LRRC32	leucine rich repeat containing 32
8043489	1.21e-11	1.04e-13	-14.8	21.3808	-2.83
8038809	1.23e-11	1.06e-13	14.8	21.3615	1.63	NKG7	natural killer cell granule protein 7
7987815	1.24e-11	1.07e-13	-14.8	21.3509	-2.09	PLA2G4F	phospholipase A2 group IVF
8021199	1.27e-11	1.11e-13	-14.8	21.3192	-1.91	MAPK4	mitogen-activated protein kinase 4
7997962	1.28e-11	1.12e-13	-14.8	21.3106	-5.08	DPEP1	dipeptidase 1 (renal)
8155442	1.29e-11	1.13e-13	-14.8	21.2936	-2.41	AQP7P1///AQP7	aquaporin 7 pseudogene 1///aquaporin 7
8155554	1.29e-11	1.13e-13	-14.8	21.2936	-2.41	AQP7P1///AQP7	aquaporin 7 pseudogene 1///aquaporin 7
7901054	1.47e-11	1.3e-13	14.7	21.1593	1.27	TCTEX1D4///PLK3	Tctex1 domain containing 4///polo like kinase 3
7899029	1.51e-11	1.33e-13	-14.7	21.1307	-2.01	MAN1C1	mannosidase alpha class 1C member 1
7931899	1.54e-11	1.36e-13	14.7	21.1065	1.33	IL15RA	interleukin 15 receptor subunit alpha
8161488	1.59e-11	1.42e-13	-14.6	21.0697	-2.35	AQP7P1///AQP7	aquaporin 7 pseudogene 1///aquaporin 7
7962226	1.78e-11	1.59e-13	-14.6	20.951	-1.5	SYT10	synaptotagmin 10
7952243	1.82e-11	1.63e-13	14.5	20.9252	1.69	C1QTNF5///MFRP	C1q and tumor necrosis factor related protein 5///membrane frizzled-related protein
8169432	1.83e-11	1.64e-13	-14.5	20.919	-2.17	ZCCHC16	zinc finger CCHC-type containing 16
8155451	1.91e-11	1.73e-13	-14.5	20.8682	-2.78
8161556	1.91e-11	1.73e-13	-14.5	20.8682	-2.78
8062312	1.91e-11	1.73e-13	14.5	20.8657	0.97	MYL9	myosin light chain 9
7923942	1.94e-11	1.77e-13	-14.5	20.8426	-2.61	FCAMR	Fc fragment of IgA and IgM receptor
7930980	1.94e-11	1.77e-13	-14.5	20.8405	-2.58	PLPP4	phospholipid phosphatase 4
7941311	1.94e-11	1.77e-13	14.5	20.8405	1.27	EHBP1L1///SIPA1	EH domain binding protein 1 like 1///signal-induced proliferation-associated 1
8030866	1.97e-11	1.81e-13	14.5	20.8222	2.84	FPR3	formyl peptide receptor 3
7901687	1.98e-11	1.82e-13	-14.5	20.8135	-1.19	TMEM61	transmembrane protein 61
8135069	1.98e-11	1.83e-13	14.5	20.8067	4.18	SERPINE1	serpin family E member 1
8020973	2.03e-11	1.88e-13	-14.4	20.7795	-1.05	FHOD3	formin homology 2 domain containing 3
8090591	2.07e-11	1.92e-13	14.4	20.7592	2.63	PLXND1	plexin D1
8148917	2.09e-11	1.96e-13	-14.4	20.7422	-1.92	MFSD3	major facilitator superfamily domain containing 3
7995128	2.17e-11	2.03e-13	14.4	20.7036	1.61	ITGAX	integrin subunit alpha X
8092348	2.17e-11	2.04e-13	14.4	20.7001	1.25	LAMP3	lysosomal associated membrane protein 3
8162502	2.19e-11	2.06e-13	-14.4	20.6876	-3.18	FBP1	fructose-bisphosphatase 1
8135594	2.21e-11	2.09e-13	14.4	20.675	3.27	CAV1	caveolin 1
8137485	2.21e-11	2.1e-13	-14.4	20.6723	-2.17	DPP6	dipeptidyl peptidase like 6
8123303	2.31e-11	2.2e-13	-14.3	20.6214	-2.03	PACRG	PARK2 coregulated
8100791	2.39e-11	2.28e-13	-14.3	20.5866	-3.66	UGT2A2///UGT2A1	UDP glucuronosyltransferase family 2 member A2///UDP glucuronosyltransferase family 2 member A1 complex locus
8033054	2.43e-11	2.33e-13	-14.3	20.5643	-2.11	FUT3	fucosyltransferase 3 (Lewis blood group)
7983393	2.49e-11	2.4e-13	-14.3	20.5362	-3.65	SORD	sorbitol dehydrogenase
7979524	2.52e-11	2.43e-13	-14.3	20.5222	-2.17	TMEM30B	transmembrane protein 30B
8112476	2.58e-11	2.5e-13	14.3	20.4952	1.94
8023361	2.63e-11	2.55e-13	-14.2	20.473	-3.51	MRO	maestro
8068651	2.71e-11	2.64e-13	-14.2	20.4381	-2.81	PCP4	Purkinje cell protein 4
7954208	2.74e-11	2.68e-13	-14.2	20.4235	-2.78	PIK3C2G	phosphatidylinositol-4-phosphate 3-kinase catalytic subunit type 2 gamma
8105935	2.81e-11	2.75e-13	14.2	20.3971	2.34
7953532	2.81e-11	2.76e-13	14.2	20.3941	3.47	ENO2	enolase 2
8113790	2.92e-11	2.88e-13	14.2	20.351	2.5	2024-03-03	membrane associated ring-CH-type finger 3
8122265	2.98e-11	2.95e-13	14.1	20.3271	1.76	TNFAIP3	TNF alpha induced protein 3
7983867	3.02e-11	2.99e-13	-14.1	20.3121	-3.9	CGNL1	cingulin like 1
8090180	3.24e-11	3.22e-13	-14.1	20.2376	-3.27	MUC13	mucin 13, cell surface associated
7976523	3.3e-11	3.29e-13	-14.1	20.2156	-2.57	TCL6	T-cell leukemia/lymphoma 6 (non-protein coding)
8077270	3.33e-11	3.33e-13	-14.1	20.2015	-3.5	CHL1	cell adhesion molecule L1 like
7936856	3.61e-11	3.62e-13	14	20.1191	1.91	CHST15	carbohydrate (N-acetylgalactosamine 4-sulfate 6-O) sulfotransferase 15
8068883	3.83e-11	3.86e-13	-14	20.0538	-3.27	CRYAA	crystallin alpha A
7995829	3.83e-11	3.87e-13	-14	20.0514	-3.44	MT1H	metallothionein 1H
8080162	3.9e-11	3.95e-13	-14	20.0308	-1.87	ABHD14A	abhydrolase domain containing 14A
8135363	4.07e-11	4.13e-13	13.9	19.9845	2.18	PIK3CG	phosphatidylinositol-4,5-bisphosphate 3-kinase catalytic subunit gamma
7966356	4.25e-11	4.33e-13	13.9	19.9367	1.06	HVCN1	hydrogen voltage gated channel 1
8086201	4.36e-11	4.45e-13	-13.9	19.909	-2.92	ACAA1	acetyl-CoA acyltransferase 1
8139488	4.38e-11	4.48e-13	13.9	19.9014	3.33	IGFBP3	insulin like growth factor binding protein 3
8072876	4.48e-11	4.6e-13	13.9	19.8749	2.37	LGALS1	galectin 1
8052979	4.68e-11	4.82e-13	-13.8	19.8273	-1.42	SFXN5	sideroflexin 5
7947462	4.77e-11	4.93e-13	-13.8	19.8052	-1.08	ABTB2	ankyrin repeat and BTB domain containing 2
8039212	5.63e-11	5.83e-13	13.7	19.6346	1.54	LILRB2	leukocyte immunoglobulin like receptor B2
8158671	5.73e-11	5.95e-13	-13.7	19.6134	-2.64	ASS1	argininosuccinate synthase 1
8121749	5.77e-11	6.01e-13	13.7	19.6042	2.88	GJA1	gap junction protein alpha 1
8124798	5.8e-11	6.06e-13	13.7	19.5961	1.98	PPP1R18	protein phosphatase 1 regulatory subunit 18
8019778	5.83e-11	6.11e-13	-13.7	19.5865	-2.03	PCYT2	phosphate cytidylyltransferase 2, ethanolamine
8035941	5.86e-11	6.16e-13	-13.7	19.5789	-3.76	SLC7A9	solute carrier family 7 member 9
7979400	5.93e-11	6.25e-13	-13.7	19.5641	-2.65	C14orf37	chromosome 14 open reading frame 37
7910950	6.29e-11	6.67e-13	-13.6	19.499	-2.34	OPN3///KMO	opsin 3///kynurenine 3-monooxygenase (kynurenine 3-hydroxylase)
8003939	6.29e-11	6.68e-13	-13.6	19.4973	-1.35	TM4SF5	transmembrane 4 L six family member 5
8112803	6.29e-11	6.68e-13	13.6	19.4961	2.06	LHFPL2	lipoma HMGIC fusion partner-like 2
8026272	6.29e-11	6.7e-13	13.6	19.4932	1.32	IL27RA	interleukin 27 receptor subunit alpha
7934271	6.71e-11	7.18e-13	-13.6	19.4237	-2.59	PLA2G12B	phospholipase A2 group XIIB
8067140	6.77e-11	7.26e-13	-13.6	19.4125	-3.12	CYP24A1	cytochrome P450 family 24 subfamily A member 1
7948229	6.77e-11	7.28e-13	13.6	19.4102	2.73	SLC43A3	solute carrier family 43 member 3
8115734	6.78e-11	7.32e-13	13.6	19.4037	2.71	LCP2	lymphocyte cytosolic protein 2
8033043	6.78e-11	7.33e-13	-13.6	19.4031	-3.01	FUT6	fucosyltransferase 6
8003611	7.59e-11	8.22e-13	13.5	19.2859	2	FAM57A	family with sequence similarity 57 member A
7919800	7.74e-11	8.43e-13	13.5	19.2602	2.46	CTSS	cathepsin S
8010770	7.74e-11	8.43e-13	13.5	19.2602	1.6	SLC16A3	solute carrier family 16 member 3
8084929	8.07e-11	8.82e-13	-13.5	19.2144	-1.11	SLC51A	solute carrier family 51 alpha subunit
7980096	8.16e-11	8.95e-13	-13.4	19.2003	-4.25
8105132	8.64e-11	9.5e-13	13.4	19.1395	1.3	LOC153684	uncharacterized LOC153684
8101862	8.74e-11	9.63e-13	-13.4	19.1257	-4.34	ADH6	alcohol dehydrogenase 6 (class V)
7996318	8.86e-11	9.79e-13	13.4	19.1086	1.75	CMTM3	CKLF like MARVEL transmembrane domain containing 3
8180216	9.05e-11	1e-12	13.4	19.0849	1.01
8046238	9.68e-11	1.08e-12	-13.3	19.0136	-1.95	MYO3B	myosin IIIB
8019280	1.02e-10	1.14e-12	-13.3	18.9542	-1.98	PCYT2	phosphate cytidylyltransferase 2, ethanolamine
8176026	1.06e-10	1.18e-12	13.3	18.918	2.01	FLNA	filamin A
8004184	1.08e-10	1.21e-12	13.3	18.8948	1.91	XAF1	XIAP associated factor 1
8114964	1.09e-10	1.22e-12	-13.3	18.8848	-2.83	SPINK1	serine peptidase inhibitor, Kazal type 1
8029530	1.09e-10	1.23e-12	-13.2	18.8781	-2.46	APOE///HMGA1	apolipoprotein E///high mobility group AT-hook 1
7896700	1.11e-10	1.26e-12	13.2	18.8557	2.61
7940259	1.12e-10	1.26e-12	13.2	18.8503	2.46	MS4A14///MS4A7	membrane spanning 4-domains A14///membrane spanning 4-domains A7
8040430	1.2e-10	1.36e-12	-13.2	18.772	-3.04	VSNL1	visinin like 1
8131339	1.27e-10	1.45e-12	13.1	18.7128	2.24	FSCN1	fascin actin-bundling protein 1
8177964	1.31e-10	1.5e-12	-13.1	18.6737	-2.45	MCCD1	mitochondrial coiled-coil domain 1
8179246	1.31e-10	1.5e-12	-13.1	18.6737	-2.45	MCCD1	mitochondrial coiled-coil domain 1
7919314	1.34e-10	1.53e-12	-13.1	18.6531	-3.65	FMO5	flavin containing monooxygenase 5
8050894	1.35e-10	1.55e-12	13.1	18.6441	1.01	KIF3C	kinesin family member 3C
7923929	1.36e-10	1.57e-12	-13.1	18.6276	-4.68	PIGR	polymeric immunoglobulin receptor
8163535	1.4e-10	1.61e-12	-13.1	18.6015	-1.43	AMBP	alpha-1-microglobulin/bikunin precursor
8157949	1.4e-10	1.62e-12	-13.1	18.5953	-1.35	RALGPS1	Ral GEF with PH domain and SH3 binding motif 1
8056327	1.41e-10	1.64e-12	-13.1	18.5851	-2.06	GRB14	growth factor receptor bound protein 14
8025402	1.46e-10	1.71e-12	13	18.5453	4.39	ANGPTL4	angiopoietin like 4
8068238	1.48e-10	1.73e-12	13	18.5336	1.85	IFNAR2	interferon alpha and beta receptor subunit 2
8044149	1.51e-10	1.76e-12	-13	18.5108	-3.48	PLGLA///PLGLB1///PLGLB2///PLG	plasminogen-like A (pseudogene)///plasminogen-like B1///plasminogen-like B2///plasminogen
8148572	1.62e-10	1.9e-12	13	18.437	1.5	LY6E	lymphocyte antigen 6 complex, locus E
8046695	1.62e-10	1.91e-12	13	18.43	2.16	CERKL///ITGA4	ceramide kinase like///integrin subunit alpha 4
7958784	1.63e-10	1.93e-12	-13	18.421	-1.73	ALDH2	aldehyde dehydrogenase 2 family (mitochondrial)
8036710	1.68e-10	1.99e-12	13	18.3894	2.02	GMFG	glia maturation factor gamma
8019912	1.77e-10	2.1e-12	12.9	18.3357	1.06	EMILIN2	elastin microfibril interfacer 2
7942774	1.78e-10	2.11e-12	-12.9	18.3282	-1.69	AQP11	aquaporin 11
8037363	1.85e-10	2.21e-12	-12.9	18.281	-1.99	CADM4	cell adhesion molecule 4
8026915	1.85e-10	2.22e-12	12.9	18.2792	1.56	ARRDC2	arrestin domain containing 2
7947363	1.93e-10	2.31e-12	-12.9	18.2371	-1.83	WT1	Wilms tumor 1
8161558	1.99e-10	2.39e-12	-12.8	18.2038	-1.65	AQP7P1///AQP7	aquaporin 7 pseudogene 1///aquaporin 7
8080562	2.01e-10	2.42e-12	-12.8	18.1908	-3.44	IL17RB	interleukin 17 receptor B
7959220	2.01e-10	2.42e-12	-12.8	18.1877	-1.16	ACADS	acyl-CoA dehydrogenase, C-2 to C-3 short chain
8155802	2.02e-10	2.45e-12	-12.8	18.1779	-3.86	GDA	guanine deaminase
8052376	2.14e-10	2.6e-12	12.8	18.1188	1.06	LOC100129434///CCDC85A	uncharacterized LOC100129434///coiled-coil domain containing 85A
8114300	2.2e-10	2.68e-12	-12.8	18.0867	-2.2	KLHL3	kelch like family member 3
8111569	2.24e-10	2.74e-12	-12.8	18.0653	-3.88	RANBP3L	RAN binding protein 3 like
7915578	2.29e-10	2.79e-12	-12.7	18.0436	-1.32	TMEM53	transmembrane protein 53
7940451	2.29e-10	2.81e-12	-12.7	18.0387	-2.32	TKFC	triokinase and FMN cyclase
7905283	2.29e-10	2.82e-12	-12.7	18.0326	-2.37	FAM63A///ANXA9	family with sequence similarity 63 member A///annexin A9
7896718	2.29e-10	2.83e-12	12.7	18.0316	2.46
8092081	2.29e-10	2.83e-12	-12.7	18.0302	-2.22
8100758	2.29e-10	2.83e-12	-12.7	18.0291	-2.31	UGT2B7	UDP glucuronosyltransferase family 2 member B7
7995492	2.29e-10	2.84e-12	12.7	18.0268	1.15	ADCY7	adenylate cyclase 7
8013671	2.33e-10	2.9e-12	-12.7	18.0053	-2.45	SPAG5///SPAG5	sperm associated antigen 5///sperm associated antigen 5
8024013	2.36e-10	2.95e-12	-12.7	17.9901	-1.31	MISP	mitotic spindle positioning
7985493	2.37e-10	2.99e-12	12.7	17.9756	1.94	TM6SF1	transmembrane 6 superfamily member 1
7919028	2.37e-10	2.99e-12	12.7	17.9733	1.14	TBX15	T-box 15
8118209	2.37e-10	3e-12	-12.7	17.9727	-3.89	APOM	apolipoprotein M
8178043	2.37e-10	3e-12	-12.7	17.9727	-3.89	APOM	apolipoprotein M
8179291	2.37e-10	3e-12	-12.7	17.9727	-3.89	APOM	apolipoprotein M
8019669	2.37e-10	3e-12	-12.7	17.971	-1.01	GCGR	glucagon receptor
7941302	2.43e-10	3.08e-12	12.7	17.9453	0.97	FAM89B	family with sequence similarity 89 member B
8142424	2.48e-10	3.16e-12	12.7	17.9199	1.03	GPR85	G protein-coupled receptor 85
7960637	2.5e-10	3.18e-12	12.7	17.9114	0.891	LPAR5	lysophosphatidic acid receptor 5
7920744	2.52e-10	3.22e-12	-12.7	17.8994	-2.13	PKLR	pyruvate kinase, liver and RBC
7896694	2.56e-10	3.28e-12	12.7	17.8792	2.13
7944152	2.56e-10	3.28e-12	12.7	17.8792	2.13	IL10RA	interleukin 10 receptor subunit alpha
8096845	2.64e-10	3.4e-12	-12.6	17.8446	-4.37	EGF	epidermal growth factor
8130867	2.66e-10	3.42e-12	12.6	17.8371	3.11	THBS2	thrombospondin 2
7957606	2.7e-10	3.49e-12	-12.6	17.8176	-1.27	SUCLG2	succinate-CoA ligase GDP-forming beta subunit
8125713	2.73e-10	3.53e-12	12.6	17.8067	1.12	TAPBP	TAP binding protein (tapasin)
8053366	2.73e-10	3.54e-12	-12.6	17.8029	-2.35	SUCLG1	succinate-CoA ligase alpha subunit
8013450	2.74e-10	3.56e-12	12.6	17.7982	2	LGALS9C///LGALS9B///LGALS9	galectin 9C///galectin 9B///galectin 9
8117288	2.8e-10	3.65e-12	12.6	17.7716	3.18	SCGN	secretagogin, EF-hand calcium binding protein
8010248	2.83e-10	3.69e-12	-12.6	17.7604	-2.18	AFMID	arylformamidase
7927179	2.9e-10	3.79e-12	-12.6	17.733	-2.58	TMEM72	transmembrane protein 72
8008885	2.9e-10	3.8e-12	12.6	17.7309	2.76	MIR21	microRNA 21
7914003	2.91e-10	3.83e-12	-12.6	17.7228	-0.957	KDF1	keratinocyte differentiation factor 1
8144557	2.91e-10	3.83e-12	-12.6	17.7226	-2.31	MSRA	methionine sulfoxide reductase A
8109629	2.96e-10	3.92e-12	12.5	17.7003	1.61	FABP6	fatty acid binding protein 6
8033635	2.98e-10	3.95e-12	12.5	17.6917	1.29	ADAMTS10	ADAM metallopeptidase with thrombospondin type 1 motif 10
7960850	3e-10	3.98e-12	12.5	17.6839	1.26	SLC2A14	solute carrier family 2 member 14
7941260	3.01e-10	4e-12	12.5	17.6795	0.806	FRMD8	FERM domain containing 8
7951437	3.11e-10	4.14e-12	12.5	17.6434	1.65	GUCY1A2	guanylate cyclase 1 soluble subunit alpha 2
7907222	3.29e-10	4.39e-12	12.5	17.5844	2.45	PRRX1	paired related homeobox 1
7976481	3.32e-10	4.45e-12	-12.5	17.5713	-1.98	SERPINA4	serpin family A member 4
7958202	3.32e-10	4.46e-12	12.5	17.5684	2.02	CHST11	carbohydrate (chondroitin 4) sulfotransferase 11
8049299	3.34e-10	4.49e-12	12.5	17.5619	1.67	SCARNA6	small Cajal body-specific RNA 6
8151942	3.34e-10	4.51e-12	-12.5	17.558	-2.94	RIDA	reactive intermediate imine deaminase A homolog
8031223	3.42e-10	4.62e-12	12.5	17.5319	1.72	LILRB1	leukocyte immunoglobulin like receptor B1
8140028	3.42e-10	4.64e-12	-12.4	17.5287	-1.04	TRIM50	tripartite motif containing 50
8001163	3.47e-10	4.72e-12	-12.4	17.5106	-1.01	MYLK3	myosin light chain kinase 3
8160024	3.47e-10	4.72e-12	-12.4	17.5105	-4.03	GLDC	glycine decarboxylase
8138487	3.61e-10	4.93e-12	-12.4	17.4672	-3.09
8105495	3.61e-10	4.93e-12	-12.4	17.4658	-1.73	PART1///PDE4D	prostate androgen-regulated transcript 1 (non-protein coding)///phosphodiesterase 4D
8068361	3.7e-10	5.07e-12	-12.4	17.4382	-1.86	SLC5A3	solute carrier family 5 member 3
8014063	3.71e-10	5.09e-12	12.4	17.4344	2.69	EVI2B	ecotropic viral integration site 2B
8012953	3.76e-10	5.18e-12	12.4	17.417	1.18	TRIM16	tripartite motif containing 16
7901110	3.8e-10	5.25e-12	-12.4	17.4016	-1.89	AKR1A1	aldo-keto reductase family 1 member A1
7945169	3.8e-10	5.26e-12	-12.4	17.4011	-3.97	TMEM45B	transmembrane protein 45B
8036224	3.8e-10	5.26e-12	12.4	17.4007	2.31	ZNF160///TYROBP	zinc finger protein 160///TYRO protein tyrosine kinase binding protein
8036176	3.83e-10	5.31e-12	-12.4	17.3904	-2.34	NPHS1	NPHS1, nephrin
7912343	4.03e-10	5.61e-12	-12.3	17.3354	-1.3	CASZ1	castor zinc finger 1
8108483	4.14e-10	5.76e-12	-12.3	17.3078	-1.62	SLC4A9	solute carrier family 4 member 9
7987475	4.22e-10	5.89e-12	12.3	17.2858	1.38	PLCB2	phospholipase C beta 2
8038683	4.27e-10	5.98e-12	-12.3	17.2701	-2.24	KLK6	kallikrein related peptidase 6
8002370	4.34e-10	6.09e-12	12.3	17.2515	1.24	ST3GAL2	ST3 beta-galactoside alpha-2,3-sialyltransferase 2
8111271	4.53e-10	6.37e-12	-12.3	17.206	-3.52	CDH9	cadherin 9
7942674	4.61e-10	6.49e-12	-12.3	17.1864	-2.19	TSKU	tsukushi, small leucine rich proteoglycan
8158771	4.72e-10	6.66e-12	-12.2	17.1604	-2.13	AIF1L	allograft inflammatory factor 1 like
7929344	4.75e-10	6.71e-12	12.2	17.1525	1.1	FFAR4	free fatty acid receptor 4
8082035	4.76e-10	6.74e-12	12.2	17.148	2.19	CD86	CD86 molecule
8043835	5.05e-10	7.17e-12	-12.2	17.0849	-1.98	C2orf15	chromosome 2 open reading frame 15
7936249	5.1e-10	7.25e-12	-12.2	17.0739	-2.25	SORCS1	sortilin related VPS10 domain containing receptor 1
7962689	5.22e-10	7.45e-12	-12.2	17.0469	-2	VDR	vitamin D (1,25- dihydroxyvitamin D3) receptor
7976515	5.43e-10	7.77e-12	-12.1	17.0043	-0.987	GLRX5	glutaredoxin 5
8104314	5.46e-10	7.82e-12	-12.1	16.9979	-0.766	IRX1	iroquois homeobox 1
7959102	5.56e-10	7.98e-12	12.1	16.9762	1.07	HSPB8	heat shock protein family B (small) member 8
8163509	5.67e-10	8.15e-12	-12.1	16.9549	-2.05	ALAD	aminolevulinate dehydratase
8074168	5.76e-10	8.3e-12	12.1	16.9365	1.03
7945132	5.76e-10	8.33e-12	12.1	16.9337	2.19	FLI1	Fli-1 proto-oncogene, ETS transcription factor
8170007	5.83e-10	8.43e-12	12.1	16.9207	0.995	SMIM10	small integral membrane protein 10
7986463	5.83e-10	8.45e-12	12.1	16.9183	1.93	LRRK1	leucine rich repeat kinase 1
8037563	5.93e-10	8.61e-12	12.1	16.899	1.16	PPP1R13L	protein phosphatase 1 regulatory subunit 13 like
7898799	5.96e-10	8.69e-12	12.1	16.8905	2.73	C1QC	complement C1q C chain
8178790	6e-10	8.76e-12	12.1	16.8823	1.31	GPSM3	G-protein signaling modulator 3
7994280	6.07e-10	8.88e-12	12.1	16.8677	1.9	IL4R	interleukin 4 receptor
8106999	6.07e-10	8.9e-12	-12.1	16.8654	-2.38	LINC01554	long intergenic non-protein coding RNA 1554
7995825	6.1e-10	8.96e-12	-12.1	16.8592	-2.66	MT1F	metallothionein 1F
8149448	6.21e-10	9.14e-12	12.1	16.8387	2.68	MSR1	macrophage scavenger receptor 1
8163116	6.24e-10	9.21e-12	-12.1	16.8314	-1.87	EPB41L4B	erythrocyte membrane protein band 4.1 like 4B
7929689	6.34e-10	9.36e-12	12	16.8144	1.33	MARVELD1	MARVEL domain containing 1
8104592	6.46e-10	9.57e-12	12	16.7919	1.49	FBXL7	F-box and leucine rich repeat protein 7
7973797	6.54e-10	9.7e-12	-12	16.7783	-1.61	COCH	cochlin
8003948	6.58e-10	9.78e-12	-12	16.7695	-1.18	GLTPD2	glycolipid transfer protein domain containing 2
8094301	6.59e-10	9.81e-12	-12	16.7666	-2.7	SLIT2	slit guidance ligand 2
8038899	6.64e-10	9.91e-12	12	16.7566	1.3	FPR1	formyl peptide receptor 1
8020220	6.83e-10	1.02e-11	12	16.7254	1.31	TUBB6	tubulin beta 6 class V
8046018	7.04e-10	1.06e-11	-12	16.6927	-1.73
7908553	7.08e-10	1.06e-11	12	16.6843	2.5	PTPRC	protein tyrosine phosphatase, receptor type C
8149979	7.16e-10	1.08e-11	-12	16.6718	-2.04	NUGGC	nuclear GTPase, germinal center associated
8029006	7.18e-10	1.08e-11	12	16.666	2.39	AXL	AXL receptor tyrosine kinase
8030078	7.32e-10	1.11e-11	-11.9	16.6447	-0.984	SPHK2	sphingosine kinase 2
7972428	7.83e-10	1.18e-11	-11.9	16.5748	-2.34	OXGR1	oxoglutarate receptor 1
8010978	7.86e-10	1.19e-11	11.9	16.5683	1.79	LOC100130876	uncharacterized LOC100130876
7934997	8.04e-10	1.22e-11	11.9	16.5429	2.01	PPP1R3C	protein phosphatase 1 regulatory subunit 3C
8079433	8.05e-10	1.23e-11	-11.9	16.5405	-3.45	PTH1R	parathyroid hormone 1 receptor
7953844	8.1e-10	1.24e-11	11.9	16.5319	0.961	LOC642846///DDX12P///DDX11	DEAD/H (Asp-Glu-Ala-Asp/His) box polypeptide 11-like///DEAD/H-box helicase 12, pseudogene///DEAD/H-box helicase 11
8167027	8.53e-10	1.3e-11	-11.9	16.4771	-2.94	RGN	regucalcin
8112731	8.53e-10	1.31e-11	11.9	16.4756	1.62	F2RL2	coagulation factor II thrombin receptor like 2
7898627	8.99e-10	1.38e-11	-11.8	16.4193	-1.07	VWA5B1	von Willebrand factor A domain containing 5B1
8014233	9.07e-10	1.39e-11	11.8	16.4089	2.57	SLFN11	schlafen family member 11
8044295	9.2e-10	1.42e-11	11.8	16.3919	1.09	SH3RF3	SH3 domain containing ring finger 3
8007757	9.33e-10	1.44e-11	11.8	16.3765	1.49	FMNL1	formin like 1
7942957	9.38e-10	1.45e-11	11.8	16.3687	1.67	PRSS23	protease, serine 23
7998604	9.83e-10	1.53e-11	-11.8	16.3176	-1.57	HAGH	hydroxyacylglutathione hydrolase
8156278	9.83e-10	1.53e-11	11.8	16.3166	0.906	C9orf47///S1PR3	chromosome 9 open reading frame 47///sphingosine-1-phosphate receptor 3
7898805	9.83e-10	1.53e-11	11.8	16.3145	2.73	C1QB	complement C1q B chain
8064175	9.93e-10	1.55e-11	-11.8	16.3031	-1.06	SLC2A4RG	SLC2A4 regulator
8001531	1.05e-09	1.65e-11	-11.7	16.2397	-3.12	MT1G	metallothionein 1G
7934553	1.07e-09	1.67e-11	-11.7	16.227	-1.45	ZNF503-AS2///ZNF503	ZNF503 antisense RNA 2///zinc finger protein 503
8106689	1.09e-09	1.71e-11	-11.7	16.2041	-2.48	CKMT2	creatine kinase, mitochondrial 2
8026806	1.1e-09	1.72e-11	11.7	16.194	1.75	COLGALT1	collagen beta(1-O)galactosyltransferase 1
8013521	1.1e-09	1.73e-11	-11.7	16.1912	-0.904
8119088	1.12e-09	1.76e-11	11.7	16.1711	1.61	CDKN1A	cyclin dependent kinase inhibitor 1A
8112841	1.15e-09	1.81e-11	-11.7	16.1435	-1.5	HOMER1	homer scaffolding protein 1
7975876	1.15e-09	1.82e-11	-11.7	16.1364	-1.16	ESRRB	estrogen related receptor beta
7962659	1.15e-09	1.83e-11	11.7	16.1335	1.23	HDAC7	histone deacetylase 7
8113709	1.16e-09	1.84e-11	11.7	16.1294	3.12	LOX	lysyl oxidase
7961031	1.19e-09	1.9e-11	11.6	16.0941	0.925	LOC642846///DDX12P///DDX11///LOC642846///DDX12P	DEAD/H (Asp-Glu-Ala-Asp/His) box polypeptide 11-like///DEAD/H-box helicase 12, pseudogene///DEAD/H-box helicase 11///DEAD/H (Asp-Glu-Ala-Asp/His) box polypeptide 11-like///DEAD/H-box helicase 12, pseudogene
8095395	1.27e-09	2.03e-11	-11.6	16.0282	-2.85	UGT2B7	UDP glucuronosyltransferase family 2 member B7
8169859	1.3e-09	2.08e-11	11.6	16.004	1.17	SASH3	SAM and SH3 domain containing 3
8136067	1.3e-09	2.08e-11	-11.6	16.0009	-2.18	TSPAN33	tetraspanin 33
7896717	1.31e-09	2.09e-11	11.6	15.9953	1.84
7958352	1.32e-09	2.11e-11	-11.6	15.9852	-1.25	BTBD11	BTB domain containing 11
7920278	1.33e-09	2.14e-11	11.6	15.974	1.65	S100A3	S100 calcium binding protein A3
7926368	1.33e-09	2.14e-11	11.6	15.9729	2.36	VIM	vimentin
8115814	1.34e-09	2.16e-11	11.6	15.9638	1.53	SH3PXD2B	SH3 and PX domains 2B
7969977	1.36e-09	2.2e-11	-11.6	15.9467	-0.953
8046283	1.36e-09	2.2e-11	-11.6	15.9426	-1.28	GAD1	glutamate decarboxylase 1
8096147	1.38e-09	2.24e-11	-11.5	15.9255	-0.868	WDFY3-AS2	WDFY3 antisense RNA 2
7999291	1.39e-09	2.27e-11	-11.5	15.9136	-2.23	C16orf89	chromosome 16 open reading frame 89
8082886	1.4e-09	2.29e-11	-11.5	15.9044	-2.26	PCCB	propionyl-CoA carboxylase beta subunit
8148317	1.41e-09	2.3e-11	11.5	15.9011	2.46	MYC	v-myc avian myelocytomatosis viral oncogene homolog
7915147	1.42e-09	2.33e-11	11.5	15.8886	1.38	FHL3	four and a half LIM domains 3
8012197	1.48e-09	2.42e-11	11.5	15.8462	1.25	PLSCR3	phospholipid scramblase 3
8104725	1.49e-09	2.44e-11	-11.5	15.8381	-0.97
7906163	1.51e-09	2.48e-11	-11.5	15.823	-1.76	RHBG	Rh family B glycoprotein (gene/pseudogene)
8080212	1.51e-09	2.48e-11	-11.5	15.8223	-1.21	GLYCTK	glycerate kinase
8167356	1.54e-09	2.54e-11	-11.5	15.7994	-1.64	GLOD5	glyoxalase domain containing 5
8137715	1.55e-09	2.57e-11	11.5	15.7856	1.01	MICALL2	MICAL like 2
8103254	1.56e-09	2.59e-11	11.5	15.7774	3.61	SFRP2	secreted frizzled related protein 2
8051793	1.62e-09	2.68e-11	-11.4	15.7428	-1.77	OXER1	oxoeicosanoid receptor 1
8116070	1.68e-09	2.79e-11	11.4	15.7015	1.24	PDLIM7	PDZ and LIM domain 7
8069301	1.68e-09	2.8e-11	11.4	15.7006	1.7	COL6A2	collagen type VI alpha 2 chain
8066214	1.68e-09	2.8e-11	11.4	15.6983	2.03	TGM2	transglutaminase 2
8000799	1.7e-09	2.84e-11	-11.4	15.6846	-2.5	GDPD3	glycerophosphodiester phosphodiesterase domain containing 3
8160546	1.77e-09	2.96e-11	-11.4	15.6415	-0.823	LINGO2	leucine rich repeat and Ig domain containing 2
8003892	1.83e-09	3.07e-11	-11.4	15.6053	-1.12	SMTNL2	smoothelin like 2
7992396	1.84e-09	3.1e-11	-11.4	15.5954	-1.58	FAHD1	fumarylacetoacetate hydrolase domain containing 1
8049246	1.87e-09	3.16e-11	11.4	15.5773	2.32	INPP5D	inositol polyphosphate-5-phosphatase D
7973336	1.87e-09	3.16e-11	11.4	15.5755	1.61	MMP14	matrix metallopeptidase 14
7931571	1.88e-09	3.19e-11	-11.4	15.5678	-1.37	PRAP1	proline rich acidic protein 1
8144322	1.93e-09	3.27e-11	-11.3	15.5406	-1.64	MYOM2	myomesin 2
8134869	1.94e-09	3.3e-11	11.3	15.533	1.75	PCOLCE	procollagen C-endopeptidase enhancer
8169709	1.96e-09	3.33e-11	-11.3	15.5234	-1.7	GLRX5	glutaredoxin 5
8007323	2.01e-09	3.42e-11	11.3	15.4954	0.716	CNTNAP1	contactin associated protein 1
8005458	2.01e-09	3.43e-11	11.3	15.494	1.73	LGALS9C///LGALS9B///LGALS9	galectin 9C///galectin 9B///galectin 9
8165752	2.02e-09	3.46e-11	11.3	15.4852	2.11	IL3RA	interleukin 3 receptor subunit alpha
8176323	2.02e-09	3.46e-11	11.3	15.4852	2.11	IL3RA	interleukin 3 receptor subunit alpha
8042391	2.04e-09	3.5e-11	11.3	15.4728	2.24	PLEK	pleckstrin
7995926	2.04e-09	3.5e-11	11.3	15.4715	1.59	NLRC5	NLR family CARD domain containing 5
7997504	2.06e-09	3.55e-11	11.3	15.4567	3.26	CDH13	cadherin 13
8026638	2.08e-09	3.59e-11	11.3	15.4473	1.48	MYO9B	myosin IXB
7967660	2.09e-09	3.61e-11	-11.3	15.4418	-0.992	RIMBP2	RIMS binding protein 2
8108199	2.15e-09	3.72e-11	-11.3	15.4092	-1.13	SLC25A48	solute carrier family 25 member 48
8001197	2.25e-09	3.89e-11	11.2	15.3642	3.47	NETO2	neuropilin and tolloid like 2
8028955	2.27e-09	3.93e-11	-11.2	15.3529	-1.53	CYP2B7P	cytochrome P450 family 2 subfamily B member 7, pseudogene
7952205	2.32e-09	4.03e-11	11.2	15.3283	3.12	MCAM	melanoma cell adhesion molecule
8034304	2.41e-09	4.19e-11	-11.2	15.2889	-2.05	ACP5	acid phosphatase 5, tartrate resistant
7900888	2.45e-09	4.28e-11	-11.2	15.2669	-1.75	IPO13	importin 13
7966234	2.56e-09	4.48e-11	-11.2	15.2215	-1.6	TRPV4	transient receptor potential cation channel subfamily V member 4
8052399	2.56e-09	4.48e-11	11.2	15.2209	1.17	BCL11A	B-cell CLL/lymphoma 11A
7954143	2.58e-09	4.53e-11	-11.2	15.2088	-2.84	PTPRO	protein tyrosine phosphatase, receptor type O
8045030	2.61e-09	4.59e-11	-11.2	15.1956	-2.01	MYO7B	myosin VIIB
8050846	2.65e-09	4.66e-11	-11.1	15.1797	-0.536	DTNB	dystrobrevin beta
8163569	2.65e-09	4.67e-11	11.1	15.1791	1.22	AKNA	AT-hook transcription factor
7954655	2.67e-09	4.71e-11	11.1	15.169	0.763	LOC642846///DDX12P///DDX11///LOC642846///DDX12P	DEAD/H (Asp-Glu-Ala-Asp/His) box polypeptide 11-like///DEAD/H-box helicase 12, pseudogene///DEAD/H-box helicase 11///DEAD/H (Asp-Glu-Ala-Asp/His) box polypeptide 11-like///DEAD/H-box helicase 12, pseudogene
7981514	2.67e-09	4.72e-11	11.1	15.1684	3.33	AHNAK2	AHNAK nucleoprotein 2
8029710	2.71e-09	4.8e-11	11.1	15.1509	1.17	VASP	vasodilator-stimulated phosphoprotein
8046020	2.73e-09	4.84e-11	-11.1	15.1415	-2.47	SCN2A	sodium voltage-gated channel alpha subunit 2
7931852	2.76e-09	4.91e-11	-11.1	15.1273	-1.74	TUBAL3	tubulin alpha like 3
8025601	2.81e-09	5.01e-11	11.1	15.1068	2.04	ICAM1	intercellular adhesion molecule 1
7992639	2.85e-09	5.09e-11	-11.1	15.0918	-1.12	TBC1D24	TBC1 domain family member 24
7999920	2.88e-09	5.14e-11	-11.1	15.0809	-1.17	GP2	glycoprotein 2
8092888	2.89e-09	5.18e-11	11.1	15.0734	0.965	TMEM44	transmembrane protein 44
7977452	2.89e-09	5.19e-11	11.1	15.0716	1.09
8093219	3e-09	5.39e-11	-11.1	15.0329	-1.73	BDH1	3-hydroxybutyrate dehydrogenase, type 1
8068496	3.05e-09	5.48e-11	-11.1	15.016	-0.974	SIM2	single-minded family bHLH transcription factor 2
7920600	3.05e-09	5.5e-11	11.1	15.0122	1.14	SHC1	SHC adaptor protein 1
7996290	3.06e-09	5.52e-11	11.1	15.0083	0.927	CMTM1///CKLF///CMTM1///CKLF	CKLF like MARVEL transmembrane domain containing 1///chemokine like factor///CKLF like MARVEL transmembrane domain containing 1///chemokine like factor
8087100	3.09e-09	5.58e-11	-11	14.9965	-1.45	UQCRC1	ubiquinol-cytochrome c reductase core protein I
8110688	3.23e-09	5.85e-11	-11	14.9489	-3.08	SLC9A3	solute carrier family 9 member A3
7982688	3.23e-09	5.86e-11	-11	14.948	-0.784	BUB1B-PAK6///PAK6	BUB1B-PAK6 readthrough///p21 (RAC1) activated kinase 6
7944769	3.32e-09	6.02e-11	-11	14.9194	-2.05	GRAMD1B	GRAM domain containing 1B
7899821	3.34e-09	6.08e-11	-11	14.9093	-0.978	KIAA1522	KIAA1522
7938485	3.39e-09	6.17e-11	11	14.8941	2.03	MICAL2	microtubule associated monooxygenase, calponin and LIM domain containing 2
7906720	3.39e-09	6.19e-11	11	14.8923	2.56	FCER1G	Fc fragment of IgE receptor Ig
8035648	3.39e-09	6.19e-11	-11	14.8908	-1.63	TM6SF2	transmembrane 6 superfamily member 2
8096511	3.42e-09	6.26e-11	-11	14.8806	-2.48	BMPR1B	bone morphogenetic protein receptor type 1B
8086908	3.45e-09	6.32e-11	-11	14.8696	-1.6	PLXNB1	plexin B1
7995681	3.51e-09	6.45e-11	11	14.8498	2.18	MMP2	matrix metallopeptidase 2
8082012	3.56e-09	6.57e-11	-11	14.8315	-2.96	SLC15A2	solute carrier family 15 member 2
7994675	3.56e-09	6.57e-11	11	14.8311	0.976	ASPHD1	aspartate beta-hydroxylase domain containing 1
7911337	3.56e-09	6.59e-11	-11	14.8274	-0.854
7973871	3.56e-09	6.59e-11	-11	14.8274	-0.854
8165696	3.56e-09	6.59e-11	-11	14.8274	-0.854
7923812	3.59e-09	6.66e-11	-11	14.8171	-1.99	RAB29	RAB29, member RAS oncogene family
7930074	3.68e-09	6.84e-11	10.9	14.7891	1.14	NFKB2	nuclear factor kappa B subunit 2
7909441	3.71e-09	6.91e-11	-10.9	14.7791	-1.91	G0S2	G0/G1 switch 2
8134814	3.71e-09	6.92e-11	10.9	14.7787	1.16	PILRA	paired immunoglobin like type 2 receptor alpha
7951781	3.75e-09	7.01e-11	-10.9	14.7642	-0.958	C11orf71	chromosome 11 open reading frame 71
8033241	3.81e-09	7.14e-11	10.9	14.7465	2.03	CD70	CD70 molecule
8141317	3.85e-09	7.22e-11	-10.9	14.7343	-2.01	CYP3A4	cytochrome P450 family 3 subfamily A member 4
8087119	3.94e-09	7.4e-11	-10.9	14.7099	-1.32	SLC26A6	solute carrier family 26 member 6
8166632	4.02e-09	7.55e-11	-10.9	14.6894	-2.91	GK	glycerol kinase
8011114	4.02e-09	7.57e-11	10.9	14.6865	1.05	SCARF1	scavenger receptor class F member 1
7898249	4.04e-09	7.63e-11	-10.9	14.6791	-0.957	SLC25A34	solute carrier family 25 member 34
8096753	4.05e-09	7.64e-11	-10.9	14.6768	-2.3	HADH	hydroxyacyl-CoA dehydrogenase
7984475	4.05e-09	7.66e-11	-10.9	14.6739	-0.95	CORO2B	coronin 2B
7906061	4.06e-09	7.69e-11	10.9	14.6712	1.63	SYT11	synaptotagmin 11
7961702	4.14e-09	7.85e-11	10.9	14.6497	1.39	KCNJ8	potassium voltage-gated channel subfamily J member 8
7944035	4.14e-09	7.87e-11	-10.9	14.6471	-0.827	APOC3	apolipoprotein C3
8016994	4.15e-09	7.89e-11	-10.9	14.644	-1.36	RNF43	ring finger protein 43
8067185	4.16e-09	7.94e-11	-10.9	14.6376	-1.62	BMP7	bone morphogenetic protein 7
8128843	4.16e-09	7.95e-11	-10.9	14.6373	-1.39	DDO	D-aspartate oxidase
8001800	4.21e-09	8.06e-11	10.9	14.6232	1.98	CDH11	cadherin 11
7959131	4.23e-09	8.1e-11	-10.8	14.6181	-2.39	BICDL1	BICD family like cargo adaptor 1
8175155	4.32e-09	8.29e-11	-10.8	14.5942	-1.86	FRMD7	FERM domain containing 7
8070826	4.32e-09	8.31e-11	10.8	14.5921	2.38	ITGB2	integrin subunit beta 2
7963054	4.36e-09	8.4e-11	10.8	14.5805	1.92	TUBA1A	tubulin alpha 1a
7904396	4.41e-09	8.5e-11	-10.8	14.5687	-4.35	HAO2	hydroxyacid oxidase 2
8104268	4.43e-09	8.58e-11	-10.8	14.559	-4.43	SLC6A19	solute carrier family 6 member 19
8125512	4.43e-09	8.6e-11	10.8	14.5562	1.63	TAP1	transporter 1, ATP binding cassette subfamily B member
8178867	4.43e-09	8.6e-11	10.8	14.5562	1.63	TAP1	transporter 1, ATP binding cassette subfamily B member
8180061	4.43e-09	8.6e-11	10.8	14.5562	1.63	TAP1	transporter 1, ATP binding cassette subfamily B member
7956878	4.52e-09	8.78e-11	10.8	14.535	2.03	IRAK3	interleukin 1 receptor associated kinase 3
8164940	4.52e-09	8.8e-11	-10.8	14.5334	-1.32	SARDH	sarcosine dehydrogenase
8138363	4.54e-09	8.86e-11	-10.8	14.5263	-2.47	SOSTDC1	sclerostin domain containing 1
8106098	4.54e-09	8.86e-11	10.8	14.5258	2.2	MAP1B	microtubule associated protein 1B
8124492	4.55e-09	8.9e-11	10.8	14.5218	2.22	HIST1H2BK	histone cluster 1, H2bk
8041508	4.57e-09	8.94e-11	10.8	14.5167	1.95	QPCT	glutaminyl-peptide cyclotransferase
7949104	4.58e-09	8.98e-11	10.8	14.5125	0.793	RASGRP2	RAS guanyl releasing protein 2
8175666	4.62e-09	9.1e-11	10.8	14.4995	1.69	GABRE	gamma-aminobutyric acid type A receptor epsilon subunit
8003875	4.62e-09	9.1e-11	-10.8	14.4995	-0.87	SPNS2	sphingolipid transporter 2
8040292	4.69e-09	9.23e-11	-10.8	14.4842	-1.62	GREB1	growth regulation by estrogen in breast cancer 1
8026294	4.74e-09	9.37e-11	-10.8	14.4693	-1.04	MISP3	MISP family member 3
8006298	4.74e-09	9.37e-11	-10.8	14.4689	-0.969	RAB11FIP4	RAB11 family interacting protein 4
8156393	4.75e-09	9.4e-11	-10.8	14.4662	-1.63	SUSD3	sushi domain containing 3
7962559	4.83e-09	9.57e-11	-10.8	14.4483	-2.21	SLC38A4	solute carrier family 38 member 4
8030158	4.88e-09	9.69e-11	10.8	14.4347	0.869	BAX	BCL2 associated X, apoptosis regulator
8004266	4.96e-09	9.87e-11	-10.7	14.4167	-1.88	SLC16A13	solute carrier family 16 member 13
7993815	4.96e-09	9.88e-11	-10.7	14.4152	-2.56	ANKS4B	ankyrin repeat and sterile alpha motif domain containing 4B
8148476	5.01e-09	1e-10	10.7	14.402	1.66	DENND3	DENN domain containing 3
7985192	5.01e-09	1e-10	-10.7	14.4008	-2.67	HYKK	hydroxylysine kinase
7926223	5.01e-09	1e-10	10.7	14.4006	1.31	CAMK1D	calcium/calmodulin dependent protein kinase ID
8097955	5.1e-09	1.02e-10	-10.7	14.3814	-0.785
7923360	5.16e-09	1.04e-10	-10.7	14.3662	-1.05	TNNI1	troponin I1, slow skeletal type
8091385	5.16e-09	1.04e-10	10.7	14.3642	4.06	CP	ceruloplasmin (ferroxidase)
7993622	5.16e-09	1.04e-10	10.7	14.364	1.18	ITPRIPL2	inositol 1,4,5-trisphosphate receptor interacting protein like 2
7998136	5.31e-09	1.07e-10	10.7	14.3337	1.14	RHBDF1	rhomboid 5 homolog 1
8134018	5.33e-09	1.08e-10	-10.7	14.3287	-2.27	ZNF804B	zinc finger protein 804B
8073682	5.37e-09	1.09e-10	10.7	14.3197	1.8	PARVG	parvin gamma
8175195	5.38e-09	1.09e-10	-10.7	14.314	-1.58	HS6ST2	heparan sulfate 6-O-sulfotransferase 2
7896706	5.38e-09	1.09e-10	10.7	14.3138	1.8
8050427	5.49e-09	1.11e-10	10.7	14.2933	2.59	FAM49A	family with sequence similarity 49 member A
7944931	5.49e-09	1.12e-10	10.7	14.2903	2.01	SLC37A2	solute carrier family 37 member 2
8180379	5.5e-09	1.12e-10	10.7	14.2869	1	MXRA7	matrix remodeling associated 7
7995206	5.5e-09	1.12e-10	10.7	14.2853	1.1	TGFB1I1	transforming growth factor beta 1 induced transcript 1
8116484	5.63e-09	1.15e-10	10.7	14.2606	0.685	MGAT1	mannosyl (alpha-1,3-)-glycoprotein beta-1,2-N-acetylglucosaminyltransferase
7909890	5.68e-09	1.16e-10	10.7	14.25	1.06	HLX	H2.0 like homeobox
8030277	5.73e-09	1.17e-10	10.7	14.2407	1.83	CD37	CD37 molecule
8045009	5.74e-09	1.18e-10	10.7	14.2361	1.58	GYPC	glycophorin C (Gerbich blood group)
7982938	5.76e-09	1.18e-10	-10.6	14.232	-1.72	TYRO3	TYRO3 protein tyrosine kinase
8166730	6e-09	1.23e-10	10.6	14.1882	2.72	CYBB	cytochrome b-245 beta chain
7901691	6.1e-09	1.26e-10	-10.6	14.1683	-1.31	BSND	barttin CLCNK type accessory beta subunit
7948274	6.1e-09	1.26e-10	10.6	14.1679	1.06	UBE2L6	ubiquitin conjugating enzyme E2 L6
7937039	6.13e-09	1.27e-10	10.6	14.1624	2.05	EBF3	early B-cell factor 3
8118124	6.16e-09	1.27e-10	-10.6	14.1564	-2.1	MCCD1	mitochondrial coiled-coil domain 1
8007550	6.16e-09	1.28e-10	-10.6	14.1541	-1.21	NAGS	N-acetylglutamate synthase
7984779	6.23e-09	1.29e-10	10.6	14.141	1.44	PML	promyelocytic leukemia
8077204	6.26e-09	1.3e-10	-10.6	14.1348	-0.852	APOC3	apolipoprotein C3
8018558	6.37e-09	1.33e-10	-10.6	14.1159	-1.76	ACOX1	acyl-CoA oxidase 1
8146649	6.47e-09	1.35e-10	-10.6	14.0977	-1.87	MTFR1	mitochondrial fission regulator 1
8025076	6.47e-09	1.35e-10	10.6	14.0967	1.51	VAV1	vav guanine nucleotide exchange factor 1
8064613	6.47e-09	1.35e-10	-10.6	14.0962	-1.13	SLC4A11	solute carrier family 4 member 11
8082667	6.55e-09	1.37e-10	-10.6	14.0816	-0.948	NUDT16	nudix hydrolase 16
7956301	6.55e-09	1.37e-10	10.6	14.0797	1.91	LRP1	LDL receptor related protein 1
7943958	6.9e-09	1.45e-10	-10.5	14.0261	-0.764	HTR3B	5-hydroxytryptamine receptor 3B
7932765	6.93e-09	1.46e-10	-10.5	14.0204	-2.43	MPP7	membrane palmitoylated protein 7
8151512	7.03e-09	1.48e-10	10.5	14.0038	1.81	PAG1	phosphoprotein membrane anchor with glycosphingolipid microdomains 1
8076563	7.11e-09	1.5e-10	-10.5	13.9913	-1.28	MCAT	malonyl-CoA-acyl carrier protein transacylase
8122773	7.35e-09	1.55e-10	10.5	13.9552	1.26	MTHFD1L	methylenetetrahydrofolate dehydrogenase (NADP+ dependent) 1-like
7956046	7.41e-09	1.57e-10	10.5	13.9454	1.61	DGKA	diacylglycerol kinase alpha
7914282	7.45e-09	1.58e-10	10.5	13.9384	1.42	SDC3	syndecan 3
8160786	7.57e-09	1.6e-10	-10.5	13.9212	-2.51	KIAA1161	KIAA1161
7948088	7.61e-09	1.62e-10	-10.5	13.9143	-2.04	SLC25A33	solute carrier family 25 member 33
8149725	7.63e-09	1.62e-10	-10.5	13.9103	-1.19	PEBP4	phosphatidylethanolamine binding protein 4
8005632	7.68e-09	1.63e-10	-10.5	13.9025	-0.824
7974316	7.68e-09	1.64e-10	10.5	13.9004	1.57	FRMD6	FERM domain containing 6
7933204	7.69e-09	1.64e-10	10.5	13.8982	2.31	C10orf10	chromosome 10 open reading frame 10
7903786	7.75e-09	1.66e-10	10.5	13.8883	1.46	CSF1	colony stimulating factor 1
8150439	7.96e-09	1.7e-10	10.5	13.8597	0.994	ANK1	ankyrin 1
7898533	7.99e-09	1.71e-10	-10.5	13.8537	-1.04	KLHDC7A	kelch domain containing 7A
8034873	7.99e-09	1.72e-10	10.5	13.853	1.81	ADGRE2	adhesion G protein-coupled receptor E2
7915435	7.99e-09	1.72e-10	-10.5	13.8514	-0.946	CLDN19	claudin 19
8027748	8.21e-09	1.77e-10	-10.4	13.8228	-1.02	FXYD3	FXYD domain containing ion transport regulator 3
7902290	8.27e-09	1.78e-10	-10.4	13.8133	-2.8	CTH	cystathionine gamma-lyase
8062728	8.28e-09	1.79e-10	-10.4	13.8108	-2.37	SGK2	SGK2, serine/threonine kinase 2
8161774	8.43e-09	1.82e-10	-10.4	13.7912	-1.95	TRPM6	transient receptor potential cation channel subfamily M member 6
7942300	8.43e-09	1.82e-10	10.4	13.7902	0.913	IL18BP	interleukin 18 binding protein
8116635	8.54e-09	1.85e-10	-10.4	13.7752	-3.04	LOC100130927///BPHL	uncharacterized LOC100130927///biphenyl hydrolase like
7912706	8.57e-09	1.86e-10	10.4	13.7707	1.19	EPHA2	EPH receptor A2
8001449	8.83e-09	1.92e-10	10.4	13.7382	1.97	IRX3	iroquois homeobox 3
8036232	8.95e-09	1.95e-10	-10.4	13.7236	-0.583	SYNE4	spectrin repeat containing nuclear envelope family member 4
8072705	8.99e-09	1.96e-10	10.4	13.717	1.35	RASD2	RASD family member 2
8124650	9.21e-09	2.01e-10	10.4	13.6911	1.83	UBD	ubiquitin D
7936242	9.52e-09	2.08e-10	10.4	13.6552	1.51	ITPRIP	inositol 1,4,5-trisphosphate receptor interacting protein
7979085	9.52e-09	2.09e-10	10.4	13.6543	1.71	PYGL	phosphorylase, glycogen, liver
8102065	9.57e-09	2.1e-10	-10.3	13.6474	-1.59	BDH2	3-hydroxybutyrate dehydrogenase, type 2
8126729	9.57e-09	2.1e-10	-10.3	13.6454	-3.22	CLIC5	chloride intracellular channel 5
8018731	9.57e-09	2.1e-10	10.3	13.6453	1.62	RHBDF2	rhomboid 5 homolog 2
8007363	9.59e-09	2.11e-10	-10.3	13.6419	-1.64	WNK4	WNK lysine deficient protein kinase 4
7899394	9.72e-09	2.14e-10	10.3	13.6263	1.98	THEMIS2	thymocyte selection associated family member 2
7896691	9.93e-09	2.2e-10	10.3	13.6018	1.97
8075886	9.93e-09	2.2e-10	10.3	13.6018	1.97	IL2RB	interleukin 2 receptor subunit beta
8031047	9.96e-09	2.2e-10	10.3	13.5976	1.98	MYADM	myeloid associated differentiation marker
8088142	1e-08	2.22e-10	-10.3	13.5889	-2.94	CHDH	choline dehydrogenase
7957260	1.01e-08	2.24e-10	10.3	13.5835	2.52	KRR1///GLIPR1	KRR1, small subunit processome component homolog///GLI pathogenesis related 1
8055465	1.05e-08	2.33e-10	10.3	13.5421	2.7	CXCR4	C-X-C motif chemokine receptor 4
7992934	1.06e-08	2.36e-10	-10.3	13.5302	-1.28	DNASE1	deoxyribonuclease 1
7918533	1.06e-08	2.36e-10	10.3	13.5278	1.77	TMIGD3///ADORA3	transmembrane and immunoglobulin domain containing 3///adenosine A3 receptor
8029476	1.06e-08	2.38e-10	-10.3	13.5212	-0.733	CBLC	Cbl proto-oncogene C
8172447	1.07e-08	2.39e-10	-10.3	13.5145	-1.77	PCSK1N	proprotein convertase subtilisin/kexin type 1 inhibitor
8098924	1.07e-08	2.4e-10	-10.3	13.5093	-1.07	LETM1	leucine zipper and EF-hand containing transmembrane protein 1
8075924	1.08e-08	2.41e-10	10.3	13.5069	1.64	MFNG	MFNG O-fucosylpeptide 3-beta-N-acetylglucosaminyltransferase
8176163	1.08e-08	2.43e-10	10.3	13.5003	0.943	GAB3	GRB2 associated binding protein 3
8075857	1.1e-08	2.47e-10	-10.3	13.4838	-2.46	TST	thiosulfate sulfurtransferase
7947165	1.1e-08	2.47e-10	-10.3	13.4831	-5.79	SLC5A12	solute carrier family 5 member 12
7920285	1.1e-08	2.47e-10	-10.3	13.4799	-1.07	S100A2	S100 calcium binding protein A2
7963289	1.12e-08	2.52e-10	10.3	13.4606	1.9	BIN2	bridging integrator 2
8174103	1.12e-08	2.54e-10	-10.3	13.4548	-2.8	GK3P///GK	glycerol kinase 3 pseudogene///glycerol kinase
7973448	1.13e-08	2.56e-10	-10.2	13.4456	-2.14	DHRS4L2///DHRS4	dehydrogenase/reductase 4 like 2///dehydrogenase/reductase 4
8103415	1.14e-08	2.58e-10	10.2	13.4386	2.22	FAM198B	family with sequence similarity 198 member B
7896721	1.19e-08	2.7e-10	10.2	13.3921	2
8138789	1.2e-08	2.72e-10	10.2	13.3849	1.58	JAZF1	JAZF zinc finger 1
8159142	1.21e-08	2.76e-10	10.2	13.3682	1.14	COL5A1	collagen type V alpha 1 chain
8165735	1.22e-08	2.79e-10	10.2	13.3582	1.46	CSF2RA	colony stimulating factor 2 receptor alpha subunit
8176306	1.22e-08	2.79e-10	10.2	13.3582	1.46	CSF2RA	colony stimulating factor 2 receptor alpha subunit
8012247	1.23e-08	2.8e-10	-10.2	13.3542	-1.78	SAT2	spermidine/spermine N1-acetyltransferase family member 2
8019831	1.23e-08	2.82e-10	-10.2	13.3462	-1.57	TYMSOS///CLUL1	TYMS opposite strand///clusterin like 1
8030782	1.28e-08	2.92e-10	10.2	13.3102	1.22	SIGLEC9	sialic acid binding Ig like lectin 9
7927215	1.28e-08	2.93e-10	10.2	13.3074	2.4	ALOX5	arachidonate 5-lipoxygenase
7908388	1.3e-08	2.98e-10	10.2	13.2921	2.62	RGS1	regulator of G-protein signaling 1
7937330	1.31e-08	3.02e-10	10.2	13.2767	1.47	IFITM2	interferon induced transmembrane protein 2
8021741	1.33e-08	3.06e-10	-10.2	13.2644	-1.85	CNDP1	carnosine dipeptidase 1
8059413	1.34e-08	3.08e-10	10.2	13.257	1.92	DOCK10	dedicator of cytokinesis 10
7938812	1.34e-08	3.1e-10	-10.1	13.2503	-1.6	IGSF22///TMEM86A	immunoglobulin superfamily member 22///transmembrane protein 86A
8043504	1.35e-08	3.11e-10	-10.1	13.2469	-4.09	MAL	mal, T-cell differentiation protein
7958913	1.37e-08	3.17e-10	10.1	13.2284	2.12	OAS2	2'-5'-oligoadenylate synthetase 2
7963670	1.37e-08	3.17e-10	10.1	13.2263	1.16	MAP3K12	mitogen-activated protein kinase kinase kinase 12
8044927	1.41e-08	3.27e-10	10.1	13.1966	1.58	INHBB///INHBB	inhibin beta B subunit///inhibin beta B subunit
7965573	1.42e-08	3.3e-10	-10.1	13.1853	-1.23	NTN4	netrin 4
8064388	1.43e-08	3.32e-10	-10.1	13.1804	-1.77	SLC52A3	solute carrier family 52 member 3
8039453	1.43e-08	3.34e-10	-10.1	13.1744	-1.61	TMEM150B	transmembrane protein 150B
7970441	1.44e-08	3.37e-10	-10.1	13.1658	-0.96	GJB2	gap junction protein beta 2
8156783	1.44e-08	3.37e-10	10.1	13.1648	2.64	COL15A1	collagen type XV alpha 1 chain
8164644	1.45e-08	3.38e-10	10.1	13.1624	1.08	FAM78A	family with sequence similarity 78 member A
7898521	1.46e-08	3.41e-10	10.1	13.1521	0.939	IGSF21	immunoglobin superfamily member 21
8014316	1.46e-08	3.42e-10	10.1	13.1507	2.28	CCL5	C-C motif chemokine ligand 5
7906400	1.46e-08	3.42e-10	10.1	13.1504	2.32	IFI16	interferon gamma inducible protein 16
8038556	1.49e-08	3.5e-10	-10.1	13.128	-3.05	NAPSA	napsin A aspartic peptidase
7980605	1.49e-08	3.51e-10	-10.1	13.1248	-1.52	KCNK10	potassium two pore domain channel subfamily K member 10
7937952	1.49e-08	3.52e-10	10.1	13.1213	1.87	OR51E1	olfactory receptor family 51 subfamily E member 1
7921840	1.5e-08	3.54e-10	-10.1	13.1161	-1.24	NR1I3	nuclear receptor subfamily 1 group I member 3
7944271	1.53e-08	3.62e-10	-10.1	13.093	-1.1	TTC36	tetratricopeptide repeat domain 36
8122099	1.56e-08	3.69e-10	-10.1	13.0736	-2.16	ENPP1	ectonucleotide pyrophosphatase/phosphodiesterase 1
8164217	1.63e-08	3.87e-10	10	13.0252	1.4	FAM129B	family with sequence similarity 129 member B
8096959	1.65e-08	3.92e-10	-10	13.0122	-2.69	ANK2	ankyrin 2, neuronal
7901613	1.66e-08	3.93e-10	-10	13.008	-2.31	FAM151A///ACOT11	family with sequence similarity 151 member A///acyl-CoA thioesterase 11
8175234	1.66e-08	3.94e-10	-10	13.0067	-3.44	GPC3	glypican 3
8144036	1.79e-08	4.25e-10	9.99	12.929	0.959	XRCC2	X-ray repair cross complementing 2
7983447	1.79e-08	4.25e-10	-9.99	12.9279	-2.16	SLC28A2	solute carrier family 28 member 2
8066074	1.79e-08	4.27e-10	9.99	12.9233	0.915	DSN1	DSN1 homolog, MIS12 kinetochore complex component
8158976	1.81e-08	4.31e-10	-9.98	12.9137	-2.4	CEL	carboxyl ester lipase
8137208	1.86e-08	4.44e-10	-9.97	12.8847	-1.42	ATP6V0E2	ATPase H+ transporting V0 subunit e2
8130859	1.88e-08	4.49e-10	-9.96	12.8727	-1.16	DACT2	dishevelled binding antagonist of beta catenin 2
7959002	1.88e-08	4.52e-10	-9.96	12.8669	-1.49	SDSL	serine dehydratase like
7971461	1.9e-08	4.56e-10	9.95	12.8582	2.48	LCP1	lymphocyte cytosolic protein 1
8060745	1.92e-08	4.61e-10	9.95	12.8458	1.11	SMOX	spermine oxidase
8159667	1.93e-08	4.64e-10	9.94	12.8399	0.652	TOR4A	torsin family 4 member A
8023466	1.97e-08	4.74e-10	-9.93	12.8176	-1.97	FECH	ferrochelatase
7966127	1.97e-08	4.75e-10	9.93	12.8153	2.33	SELPLG	selectin P ligand
8073449	1.99e-08	4.82e-10	-9.93	12.8013	-1.45	CSDC2	cold shock domain containing C2
7977033	2.03e-08	4.91e-10	-9.92	12.7824	-1.48	AMN	amnion associated transmembrane protein
7994603	2.04e-08	4.94e-10	9.91	12.7753	1.22	SPN	sialophorin
8136918	2.05e-08	4.97e-10	9.91	12.7696	1.76	ZYX	zyxin
8056151	2.08e-08	5.06e-10	-9.9	12.7514	-2.46	PLA2R1	phospholipase A2 receptor 1
7969288	2.09e-08	5.07e-10	-9.9	12.7482	-2.19	OLFM4	olfactomedin 4
7961524	2.12e-08	5.16e-10	-9.89	12.7319	-2.3	ERP27	endoplasmic reticulum protein 27
8094988	2.14e-08	5.21e-10	-9.89	12.7217	-2.82	CWH43	cell wall biogenesis 43 C-terminal homolog
8139737	2.16e-08	5.28e-10	-9.88	12.708	-1.04	PSPH	phosphoserine phosphatase
8014812	2.2e-08	5.36e-10	-9.87	12.6919	-0.836	STAC2	SH3 and cysteine rich domain 2
8141459	2.21e-08	5.4e-10	9.87	12.6843	1.34	GAL3ST4	galactose-3-O-sulfotransferase 4
8074070	2.24e-08	5.47e-10	-9.86	12.6708	-3.28	MIOX	myo-inositol oxygenase
8106068	2.24e-08	5.49e-10	-9.86	12.6672	-1.67	MCCC2	methylcrotonoyl-CoA carboxylase 2
8177601	2.24e-08	5.49e-10	-9.86	12.6672	-1.67	MCCC2	methylcrotonoyl-CoA carboxylase 2
8145055	2.28e-08	5.6e-10	9.85	12.6484	1.6	BMP1	bone morphogenetic protein 1
7938390	2.32e-08	5.7e-10	9.84	12.6293	2.35	ADM	adrenomedullin
7894002	2.37e-08	5.84e-10	-9.83	12.6053	-1.08
8025103	2.38e-08	5.88e-10	9.83	12.5982	0.784	ADGRE1	adhesion G protein-coupled receptor E1
8000890	2.38e-08	5.88e-10	-9.83	12.5981	-1.21	SEPHS2	selenophosphate synthetase 2
8178295	2.41e-08	5.97e-10	9.82	12.582	1.76	UBD	ubiquitin D
7968351	2.41e-08	5.97e-10	9.82	12.5818	2.11	MEDAG	mesenteric estrogen dependent adipogenesis
7896712	2.41e-08	5.98e-10	9.82	12.5804	2.77
7898693	2.42e-08	6.01e-10	-9.82	12.5766	-2.69	ALPL	alkaline phosphatase, liver/bone/kidney
7945620	2.46e-08	6.12e-10	-9.81	12.5573	-0.725	TOLLIP	toll interacting protein
7914000	2.54e-08	6.31e-10	-9.79	12.5265	-1.14	NR0B2	nuclear receptor subfamily 0 group B member 2
7949857	2.55e-08	6.34e-10	-9.79	12.5209	-0.844	NUDT8	nudix hydrolase 8
8147777	2.57e-08	6.41e-10	9.78	12.5104	1.28	CTHRC1	collagen triple helix repeat containing 1
8114612	2.57e-08	6.42e-10	9.78	12.5089	2.12	CD14	CD14 molecule
8129231	2.6e-08	6.5e-10	-9.78	12.4961	-0.742	FAM184A	family with sequence similarity 184 member A
7933672	2.63e-08	6.57e-10	-9.77	12.4842	-1.45	PCDH15	protocadherin related 15
7922994	2.63e-08	6.58e-10	-9.77	12.4838	-1.42	BRINP3	BMP/retinoic acid inducible neural specific 3
8054338	2.63e-08	6.6e-10	9.77	12.4801	0.491	CREG2	cellular repressor of E1A stimulated genes 2
8020037	2.65e-08	6.65e-10	9.76	12.4733	1.31	MTCL1	microtubule crosslinking factor 1
8123920	2.7e-08	6.79e-10	9.75	12.4518	1.8	ELOVL2	ELOVL fatty acid elongase 2
8060805	2.73e-08	6.88e-10	-9.75	12.4379	-1.68	CHGB	chromogranin B
8149097	2.74e-08	6.89e-10	-9.75	12.4362	-2.04	DEFB1	defensin beta 1
8081235	2.75e-08	6.95e-10	9.74	12.428	1.86	COL8A1	collagen type VIII alpha 1 chain
7948904	2.81e-08	7.1e-10	9.73	12.4055	1.67	SNORD28	small nucleolar RNA, C/D box 28
7976182	2.87e-08	7.26e-10	-9.72	12.3827	-0.611	KCNK13	potassium two pore domain channel subfamily K member 13
7936100	2.96e-08	7.49e-10	9.71	12.3512	1.69	CALHM2	calcium homeostasis modulator 2
8081657	2.97e-08	7.53e-10	9.7	12.3465	2.06	CD200	CD200 molecule
8091629	3e-08	7.6e-10	-9.7	12.3362	-1.23	C3orf33	chromosome 3 open reading frame 33
8114920	3e-08	7.63e-10	9.7	12.3332	2.11	DPYSL3	dihydropyrimidinase like 3
8020141	3.03e-08	7.71e-10	9.69	12.3224	1.56	APCDD1	APC down-regulated 1
7909127	3.03e-08	7.73e-10	-9.69	12.3197	-2.65	MFSD4A	major facilitator superfamily domain containing 4A
8149264	3.04e-08	7.75e-10	9.69	12.3171	1.02	PPP1R3B	protein phosphatase 1 regulatory subunit 3B
7896711	3.04e-08	7.75e-10	9.69	12.3169	1.74
8026090	3.04e-08	7.78e-10	-9.69	12.3132	-1.75	GCDH	glutaryl-CoA dehydrogenase
7943413	3.06e-08	7.82e-10	9.68	12.3075	2.41	BIRC3	baculoviral IAP repeat containing 3
8132819	3.06e-08	7.84e-10	9.68	12.3046	1.93	IKZF1	IKAROS family zinc finger 1
7938366	3.09e-08	7.92e-10	9.68	12.2948	1.46	WEE1	WEE1 G2 checkpoint kinase
8088397	3.2e-08	8.21e-10	-9.66	12.2582	-3.11	ACOX2	acyl-CoA oxidase 2
7953150	3.26e-08	8.38e-10	9.65	12.2371	0.995	TEAD4	TEA domain transcription factor 4
8053406	3.29e-08	8.47e-10	-9.64	12.2256	-1.66	RETSAT	retinol saturase
7997593	3.29e-08	8.48e-10	-9.64	12.2245	-1.05	ATP2C2	ATPase secretory pathway Ca2+ transporting 2
8050557	3.3e-08	8.51e-10	-9.64	12.221	-1.55	SDC1	syndecan 1
8105908	3.35e-08	8.66e-10	-9.63	12.203	-1.8	OCLN///LOC647859	occludin///occludin pseudogene
8143127	3.37e-08	8.72e-10	-9.63	12.1968	-1.11	FAM180A	family with sequence similarity 180 member A
8060187	3.41e-08	8.83e-10	-9.62	12.1836	-1.52	C2orf54	chromosome 2 open reading frame 54
7966760	3.47e-08	8.99e-10	-9.62	12.1659	-2.07	FBXO21	F-box protein 21
7948420	3.5e-08	9.09e-10	9.61	12.1546	2.45	FABP5P3///FABP5	fatty acid binding protein 5 pseudogene 3///fatty acid binding protein 5
8167449	3.53e-08	9.16e-10	9.61	12.1464	1.7	PLP2	proteolipid protein 2
8177717	3.54e-08	9.22e-10	9.6	12.1402	1.19	HLA-F	major histocompatibility complex, class I, F
8004331	3.61e-08	9.4e-10	9.59	12.1202	0.735	KCTD11///ACAP1	potassium channel tetramerization domain containing 11///ArfGAP with coiled-coil, ankyrin repeat and PH domains 1
8070933	3.72e-08	9.7e-10	-9.58	12.0884	-2.28	FTCD	formimidoyltransferase cyclodeaminase
8069026	3.73e-08	9.73e-10	-9.58	12.0849	-1.47	C21orf33	chromosome 21 open reading frame 33
7993756	3.73e-08	9.74e-10	-9.58	12.0842	-3.04	ERI2///ACSM3	ERI1 exoribonuclease family member 2///acyl-CoA synthetase medium-chain family member 3
8037003	3.76e-08	9.84e-10	9.57	12.0732	0.77
8168359	3.85e-08	1.01e-09	9.56	12.0498	1.04	NHSL2	NHS like 2
8016371	3.91e-08	1.02e-09	-9.55	12.0329	-1.54	SCRN2	secernin 2
7931204	3.95e-08	1.04e-09	-9.55	12.0211	-1.49	LHPP	phospholysine phosphohistidine inorganic pyrophosphate phosphatase
7931353	3.95e-08	1.04e-09	9.54	12.02	2.18	PTPRE	protein tyrosine phosphatase, receptor type E
8004534	3.99e-08	1.05e-09	-9.54	12.0085	-0.986	SHBG	sex hormone binding globulin
7994769	4.02e-08	1.06e-09	9.53	11.9988	2.14	CORO1A	coronin 1A
7979824	4.06e-08	1.07e-09	9.53	11.9886	2	ACTN1	actinin alpha 1
8165684	4.06e-08	1.07e-09	-9.53	11.9875	-2.27
7921667	4.1e-08	1.08e-09	9.52	11.9744	1.91	CD48	CD48 molecule
8016387	4.31e-08	1.14e-09	-9.5	11.9236	-2.27	PRR15L	proline rich 15 like
7973458	4.43e-08	1.17e-09	-9.48	11.8949	-2.13	DHRS4L2///DHRS4	dehydrogenase/reductase 4 like 2///dehydrogenase/reductase 4
8143518	4.43e-08	1.17e-09	-9.48	11.8936	-0.948	TRPV5	transient receptor potential cation channel subfamily V member 5
7944478	4.49e-08	1.19e-09	-9.48	11.8787	-1.71	PDZD3	PDZ domain containing 3
8093821	4.51e-08	1.2e-09	-9.47	11.8709	-1.65	LINC00955	long intergenic non-protein coding RNA 955
8118571	4.51e-08	1.2e-09	9.47	11.8687	1.51	PSMB9	proteasome subunit beta 9
8178211	4.51e-08	1.2e-09	9.47	11.8687	1.51	PSMB9	proteasome subunit beta 9
8179495	4.51e-08	1.2e-09	9.47	11.8687	1.51	PSMB9	proteasome subunit beta 9
8090872	4.71e-08	1.26e-09	-9.45	11.8238	-0.942	KY	kyphoscoliosis peptidase
8051396	4.71e-08	1.26e-09	9.45	11.8223	1.14	NLRC4	NLR family CARD domain containing 4
7963631	4.72e-08	1.26e-09	9.45	11.819	0.985	RARG	retinoic acid receptor gamma
7996341	4.76e-08	1.28e-09	-9.44	11.8068	-1.82	PDP2	pyruvate dehyrogenase phosphatase catalytic subunit 2
8176923	4.76e-08	1.28e-09	9.44	11.8064	0.713	CSPG4P5///CSPG4P1Y///CSPG4	chondroitin sulfate proteoglycan 4 pseudogene 5///chondroitin sulfate proteoglycan 4 pseudogene 1, Y-linked///chondroitin sulfate proteoglycan 4
8177410	4.76e-08	1.28e-09	9.44	11.8064	0.713	CSPG4P5///CSPG4P1Y///CSPG4	chondroitin sulfate proteoglycan 4 pseudogene 5///chondroitin sulfate proteoglycan 4 pseudogene 1, Y-linked///chondroitin sulfate proteoglycan 4
8133459	4.87e-08	1.31e-09	9.43	11.7817	1.14	CLIP2	CAP-Gly domain containing linker protein 2
8050766	4.92e-08	1.32e-09	9.43	11.772	2.01	ADCY3	adenylate cyclase 3
8105481	4.94e-08	1.33e-09	9.42	11.7662	2.3	GAPT	GRB2-binding adaptor protein, transmembrane
7976292	5e-08	1.35e-09	9.42	11.752	0.854	RIN3	Ras and Rab interactor 3
8150204	5.01e-08	1.35e-09	-9.41	11.7481	-0.847
8124437	5.03e-08	1.36e-09	9.41	11.744	1.26	HIST1H3F	histone cluster 1, H3f
8151475	5.06e-08	1.37e-09	-9.41	11.7371	-0.999	TPD52	tumor protein D52
8126279	5.08e-08	1.38e-09	9.41	11.7309	1.54	TREM2	triggering receptor expressed on myeloid cells 2
8026579	5.15e-08	1.4e-09	-9.4	11.716	-0.912	TMEM38A	transmembrane protein 38A
8027128	5.2e-08	1.41e-09	-9.39	11.7055	-1.59	SLC25A42	solute carrier family 25 member 42
7892845	5.29e-08	1.44e-09	9.38	11.686	0.724
7893341	5.29e-08	1.44e-09	9.38	11.686	0.724
8121515	5.29e-08	1.44e-09	-9.38	11.6856	-2.18	SLC16A10	solute carrier family 16 member 10
7906767	5.33e-08	1.45e-09	9.38	11.6753	2.56	FCGR2C///FCGR2B	Fc fragment of IgG receptor IIc (gene/pseudogene)///Fc fragment of IgG receptor IIb
7944164	5.46e-08	1.49e-09	-9.37	11.6508	-1.94	TMPRSS4	transmembrane protease, serine 4
8047763	5.5e-08	1.5e-09	9.36	11.6419	1.68	NRP2	neuropilin 2
8127419	5.5e-08	1.5e-09	-9.36	11.6408	-0.941	ADH5	alcohol dehydrogenase 5 (class III), chi polypeptide
7991224	5.54e-08	1.52e-09	9.36	11.6327	0.913	HAPLN3	hyaluronan and proteoglycan link protein 3
8055992	5.54e-08	1.52e-09	-9.36	11.6303	-1.07	ACVR1C	activin A receptor type 1C
7929779	5.58e-08	1.53e-09	-9.35	11.6233	-2.67	ABCC2	ATP binding cassette subfamily C member 2
7969986	5.6e-08	1.54e-09	9.35	11.6174	1.81	TNFSF13B	tumor necrosis factor superfamily member 13b
7969815	5.61e-08	1.54e-09	-9.35	11.6154	-2.79	CLYBL	citrate lyase beta like
7946245	5.66e-08	1.56e-09	9.35	11.6039	1.66	DCHS1	dachsous cadherin-related 1
8079772	5.67e-08	1.56e-09	-9.34	11.6013	-1.65	APEH	acylaminoacyl-peptide hydrolase
8029907	5.73e-08	1.58e-09	9.34	11.5906	0.905	C5AR1	complement component 5a receptor 1
7901883	5.74e-08	1.59e-09	-9.34	11.587	-5.41	ANGPTL3	angiopoietin like 3
8141066	5.82e-08	1.61e-09	-9.33	11.5724	-2.82	PON3	paraoxonase 3
8072757	5.87e-08	1.63e-09	9.33	11.5613	1.31	CSF2RB	colony stimulating factor 2 receptor beta common subunit
8093852	5.91e-08	1.64e-09	9.32	11.5533	0.666	MSX1	msh homeobox 1
7986110	5.91e-08	1.64e-09	9.32	11.552	0.653	FES	FES proto-oncogene, tyrosine kinase
7910381	5.92e-08	1.65e-09	9.32	11.5497	1.28	DUSP5P1	dual specificity phosphatase 5 pseudogene 1
8158431	5.94e-08	1.65e-09	-9.32	11.5447	-1.83	PHYHD1	phytanoyl-CoA dioxygenase domain containing 1
7914112	6.18e-08	1.72e-09	9.3	11.5035	1.21	FGR	FGR proto-oncogene, Src family tyrosine kinase
8171823	6.18e-08	1.72e-09	-9.3	11.5025	-1.61	APOO	apolipoprotein O
7945283	6.25e-08	1.74e-09	-9.29	11.4909	-1.97	ACAD8	acyl-CoA dehydrogenase family member 8
7947230	6.27e-08	1.75e-09	9.29	11.4862	1.11	BDNF	brain derived neurotrophic factor
7981481	6.27e-08	1.75e-09	-9.29	11.4855	-0.744	C14orf2	chromosome 14 open reading frame 2
8121212	6.28e-08	1.76e-09	-9.29	11.483	-2.06
8139640	6.29e-08	1.76e-09	-9.29	11.4801	-3.93	DDC	dopa decarboxylase
8160504	6.34e-08	1.78e-09	-9.28	11.4711	-3.73	LRRC19	leucine rich repeat containing 19
8147049	6.43e-08	1.81e-09	9.27	11.4548	2.37	FABP5P3///FABP5	fatty acid binding protein 5 pseudogene 3///fatty acid binding protein 5
7936968	6.45e-08	1.81e-09	9.27	11.4503	1.56	ADAM12	ADAM metallopeptidase domain 12
7904930	6.5e-08	1.83e-09	-9.27	11.4423	-1.71	GPR89A///GPR89B	G protein-coupled receptor 89A///G protein-coupled receptor 89B
8068353	6.53e-08	1.84e-09	-9.27	11.4359	-1.55	MRPS6///SLC5A3	mitochondrial ribosomal protein S6///solute carrier family 5 member 3
7894453	6.58e-08	1.86e-09	9.26	11.4269	1.2
7943749	6.58e-08	1.86e-09	9.26	11.4251	2.86	LAYN	layilin
8009502	6.61e-08	1.87e-09	9.26	11.4195	1.92	KCNJ2	potassium voltage-gated channel subfamily J member 2
7915425	6.65e-08	1.88e-09	-9.25	11.4128	-1.82	ZMYND12	zinc finger MYND-type containing 12
8065738	6.67e-08	1.89e-09	-9.25	11.4087	-1.39	AHCY	adenosylhomocysteinase
8167305	6.68e-08	1.89e-09	-9.25	11.406	-1.47	EBP	emopamil binding protein (sterol isomerase)
7922104	6.69e-08	1.9e-09	-9.25	11.4042	-1.88	GCSHP3///LOC729080///GCSH	glycine cleavage system protein H pseudogene 3///glycine cleavage system protein H (aminomethyl carrier) pseudogene///glycine cleavage system protein H
7903893	6.73e-08	1.91e-09	9.25	11.3963	2.55	CD53	CD53 molecule
8095043	6.73e-08	1.91e-09	-9.25	11.3961	-2.24	RASL11B	RAS like family 11 member B
7905918	6.82e-08	1.94e-09	9.24	11.3813	0.757	EFNA3	ephrin A3
7912250	6.83e-08	1.95e-09	9.24	11.3776	0.645
7975562	6.89e-08	1.97e-09	-9.23	11.3677	-0.994	PAPLN///NDRG2	papilin, proteoglycan like sulfated glycoprotein///NDRG family member 2
7905047	7.01e-08	2e-09	9.22	11.3497	2.61	FCGR1CP///FCGR1B///FCGR1A	Fc fragment of IgG receptor Ic, pseudogene///Fc fragment of IgG receptor Ib///Fc fragment of IgG receptor Ia
8154367	7.14e-08	2.04e-09	-9.22	11.3293	-1.8	TYRP1	tyrosinase related protein 1
8022310	7.16e-08	2.05e-09	9.21	11.3254	1.83	PIEZO2	piezo type mechanosensitive ion channel component 2
8086627	7.26e-08	2.08e-09	-9.21	11.3111	-1.04	ALS2CL	ALS2 C-terminal like
8034920	7.27e-08	2.08e-09	-9.21	11.3087	-1.17	ILVBL	ilvB acetolactate synthase like
8160040	7.36e-08	2.11e-09	-9.2	11.2949	-2.42	PTPRD	protein tyrosine phosphatase, receptor type D
7936673	7.36e-08	2.12e-09	9.2	11.2931	0.91	RGS10	regulator of G-protein signaling 10
8080121	7.43e-08	2.14e-09	-9.19	11.2824	-1.05	TEX264	testis expressed 264
7940869	7.51e-08	2.16e-09	9.19	11.2709	1.29	FERMT3	fermitin family member 3
7941444	7.53e-08	2.17e-09	9.19	11.2673	1.75	CTSW	cathepsin W
8105987	7.62e-08	2.2e-09	9.18	11.2535	1.4
7946478	7.63e-08	2.2e-09	9.18	11.2521	1.33	DENND5A	DENN domain containing 5A
8001007	7.83e-08	2.26e-09	-9.17	11.2243	-2.73	PRSS8	protease, serine 8
7961829	7.91e-08	2.29e-09	9.16	11.2129	1.58	BCAT1	branched chain amino acid transaminase 1
7897460	7.98e-08	2.31e-09	-9.16	11.2027	-1.89	SLC25A33	solute carrier family 25 member 33
8035351	8.01e-08	2.32e-09	9.15	11.1978	0.973	JAK3	Janus kinase 3
8045247	8.1e-08	2.35e-09	-9.15	11.1847	-1.29	PLEKHB2	pleckstrin homology domain containing B2
7924508	8.22e-08	2.39e-09	-9.14	11.1692	-1.46	SUSD4	sushi domain containing 4
8001981	8.3e-08	2.42e-09	9.13	11.1582	1.17	FHOD1///SLC9A5	formin homology 2 domain containing 1///solute carrier family 9 member A5
7906377	8.33e-08	2.43e-09	9.13	11.1538	2	MNDA	myeloid cell nuclear differentiation antigen
8047738	8.35e-08	2.43e-09	9.13	11.1506	1.81	NRP2	neuropilin 2
7963092	8.43e-08	2.46e-09	9.13	11.1398	2.19	FMNL3	formin like 3
8066609	8.46e-08	2.47e-09	-9.12	11.1344	-0.521	SPATA25	spermatogenesis associated 25
7946661	8.49e-08	2.48e-09	9.12	11.1303	2.1	DKK3	dickkopf WNT signaling pathway inhibitor 3
7996819	8.5e-08	2.49e-09	-9.12	11.1275	-1.43	CDH3	cadherin 3
7989335	8.7e-08	2.55e-09	9.11	11.1035	1.58	ANXA2	annexin A2
8006779	8.81e-08	2.59e-09	9.1	11.0891	1.34
8154733	8.85e-08	2.6e-09	-9.1	11.083	-1.91	ACO1	aconitase 1
7956395	8.92e-08	2.62e-09	9.09	11.074	1.63	NXPH4	neurexophilin 4
8002218	8.96e-08	2.64e-09	-9.09	11.0686	-1.61	ESRP2	epithelial splicing regulatory protein 2
8179228	8.98e-08	2.64e-09	9.09	11.066	0.912	TCF19	transcription factor 19
8006655	9.07e-08	2.67e-09	-9.09	11.0548	-1.96	DHRS11	dehydrogenase/reductase 11
8071758	9.14e-08	2.7e-09	9.08	11.0454	0.792	MMP11	matrix metallopeptidase 11
8137252	9.17e-08	2.71e-09	9.08	11.0407	1.15	GIMAP1	GTPase, IMAP family member 1
7941074	9.23e-08	2.73e-09	-9.08	11.0338	-3.44	SLC22A12	solute carrier family 22 member 12
8113483	9.24e-08	2.74e-09	-9.08	11.0317	-1.85	TMEM232	transmembrane protein 232
7910559	9.29e-08	2.75e-09	9.07	11.0249	0.837	TSNAX-DISC1///DISC1	TSNAX-DISC1 readthrough (NMD candidate)///disrupted in schizophrenia 1
7982805	9.34e-08	2.77e-09	-9.07	11.0183	-1.05	GCHFR	GTP cyclohydrolase I feedback regulator
7975602	9.53e-08	2.83e-09	-9.06	10.9966	-1.98	ACOT2	acyl-CoA thioesterase 2
8116532	9.59e-08	2.85e-09	9.06	10.9889	1	SNORD95	small nucleolar RNA, C/D box 95
7996393	9.81e-08	2.92e-09	9.04	10.9656	1.2	CBFB	core-binding factor beta subunit
8024687	9.86e-08	2.94e-09	-9.04	10.9585	-1.17
8115122	9.92e-08	2.96e-09	-9.04	10.9521	-0.904	CAMK2A	calcium/calmodulin dependent protein kinase II alpha
7923958	9.93e-08	2.97e-09	-9.04	10.9494	-1.55	C1orf116	chromosome 1 open reading frame 116
8101893	9.94e-08	2.97e-09	-9.04	10.9477	-2.69	ADH1C	alcohol dehydrogenase 1C (class I), gamma polypeptide
8151334	1e-07	3e-09	9.03	10.936	1.83	MSC	musculin
8099132	1e-07	3.01e-09	9.03	10.935	0.813	CYTL1	cytokine like 1
7979658	1.02e-07	3.07e-09	-9.02	10.9143	-1.21	GPX2	glutathione peroxidase 2
8173299	1.02e-07	3.07e-09	9.02	10.9129	2.05	EDA2R	ectodysplasin A2 receptor
8053386	1.02e-07	3.08e-09	-9.02	10.9116	-0.76
8118086	1.03e-07	3.1e-09	9.01	10.9025	0.888	TCF19	transcription factor 19
8177947	1.03e-07	3.1e-09	9.01	10.9025	0.888	TCF19	transcription factor 19
7972946	1.03e-07	3.12e-09	9.01	10.899	1.71	RASA3	RAS p21 protein activator 3
8080344	1.06e-07	3.19e-09	9	10.8765	2.1	STAB1	stabilin 1
8066117	1.06e-07	3.21e-09	9	10.8691	2.26	TLDC2///SAMHD1	TBC/LysM-associated domain containing 2///SAM and HD domain containing deoxynucleoside triphosphate triphosphohydrolase 1
8099965	1.06e-07	3.22e-09	-9	10.8661	-1.66	LOC344967///ACOT7	acyl-CoA thioesterase 7 pseudogene///acyl-CoA thioesterase 7
8089911	1.06e-07	3.22e-09	9	10.8653	1.89	HCLS1	hematopoietic cell-specific Lyn substrate 1
8067610	1.07e-07	3.23e-09	-9	10.8615	-0.699	CHRNA4	cholinergic receptor nicotinic alpha 4 subunit
7960464	1.07e-07	3.24e-09	8.99	10.86	3.91	VWF	von Willebrand factor
7922420	1.08e-07	3.27e-09	-8.99	10.8513	-1.47	SERPINC1	serpin family C member 1
7910379	1.08e-07	3.28e-09	8.99	10.8456	0.966	DUSP5P1	dual specificity phosphatase 5 pseudogene 1
7907297	1.08e-07	3.29e-09	-8.99	10.8445	-3.05	FMO4	flavin containing monooxygenase 4
8065359	1.09e-07	3.3e-09	8.99	10.8392	2.4	CD93	CD93 molecule
7922846	1.09e-07	3.32e-09	8.98	10.8334	2.05	FAM129A	family with sequence similarity 129 member A
7964927	1.09e-07	3.34e-09	-8.98	10.8289	-3.49	TSPAN8	tetraspanin 8
8004408	1.13e-07	3.43e-09	8.97	10.7998	1.43	FGF11	fibroblast growth factor 11
7975613	1.13e-07	3.44e-09	-8.97	10.7982	-1.31	ACOT6	acyl-CoA thioesterase 6
8155327	1.13e-07	3.46e-09	-8.96	10.7924	-2.15	ALDH1B1	aldehyde dehydrogenase 1 family member B1
7896699	1.14e-07	3.5e-09	8.96	10.7805	1.69
8164810	1.15e-07	3.52e-09	8.95	10.7736	1.11	RALGDS	ral guanine nucleotide dissociation stimulator
8117408	1.15e-07	3.54e-09	8.95	10.7691	0.789	HIST1H2AE	histone cluster 1, H2ae
8033097	1.17e-07	3.6e-09	8.94	10.7504	0.839	RFX2	regulatory factor X2
8098342	1.2e-07	3.68e-09	8.93	10.7285	1.47	SAP30	Sin3A associated protein 30
7904853	1.2e-07	3.69e-09	-8.93	10.7279	-1.76	GPR89A///GPR89B	G protein-coupled receptor 89A///G protein-coupled receptor 89B
8025498	1.2e-07	3.69e-09	8.93	10.7279	1.34	SNORA70B///SNORA70///RPL10	small nucleolar RNA, H/ACA box 70B///small nucleolar RNA, H/ACA box 70///ribosomal protein L10
7963328	1.2e-07	3.7e-09	-8.93	10.7246	-0.902	FIGNL2	fidgetin like 2
8180374	1.21e-07	3.74e-09	8.93	10.7118	1.46	APOBEC3F	apolipoprotein B mRNA editing enzyme catalytic subunit 3F
8009653	1.21e-07	3.75e-09	8.93	10.7106	1.54	CD300A	CD300a molecule
7923635	1.21e-07	3.75e-09	-8.93	10.7104	-1.31	PLEKHA6	pleckstrin homology domain containing A6
8105040	1.23e-07	3.82e-09	8.92	10.6916	2.28	OSMR	oncostatin M receptor
8118149	1.23e-07	3.83e-09	8.92	10.6897	1.88	LST1	leukocyte specific transcript 1
8177988	1.23e-07	3.83e-09	8.92	10.6897	1.88	LST1	leukocyte specific transcript 1
8179268	1.23e-07	3.83e-09	8.92	10.6897	1.88	LST1	leukocyte specific transcript 1
7956229	1.24e-07	3.85e-09	-8.91	10.6839	-3.37	SLC39A5	solute carrier family 39 member 5
8128991	1.25e-07	3.88e-09	8.91	10.6744	3.62	LAMA4	laminin subunit alpha 4
7943075	1.26e-07	3.92e-09	8.9	10.6654	0.823	FAT3	FAT atypical cadherin 3
8031238	1.26e-07	3.93e-09	8.9	10.6636	1.83
7911178	1.26e-07	3.94e-09	8.9	10.6596	0.944	NLRP3	NLR family pyrin domain containing 3
7977046	1.26e-07	3.94e-09	8.9	10.6591	1.13	TNFAIP2	TNF alpha induced protein 2
8034130	1.26e-07	3.95e-09	8.9	10.6585	1.22	KANK2	KN motif and ankyrin repeat domains 2
8040419	1.26e-07	3.95e-09	-8.9	10.6579	-1.06	MYCN	v-myc avian myelocytomatosis viral oncogene neuroblastoma derived homolog
8045664	1.26e-07	3.95e-09	-8.9	10.6569	-1.12	LYPD6B	LY6/PLAUR domain containing 6B
7906757	1.27e-07	3.97e-09	8.9	10.6513	2.71	FCGR2A	Fc fragment of IgG receptor IIa
8152867	1.29e-07	4.05e-09	8.89	10.6311	1.99	ASAP1	ArfGAP with SH3 domain, ankyrin repeat and PH domain 1
7931168	1.3e-07	4.07e-09	-8.89	10.6265	-3.29	ACADSB	acyl-CoA dehydrogenase, short/branched chain
8060344	1.31e-07	4.1e-09	8.88	10.619	0.791	TRIB3	tribbles pseudokinase 3
8009040	1.31e-07	4.13e-09	8.88	10.6123	0.858	MRC2	mannose receptor C type 2
7998784	1.35e-07	4.25e-09	8.87	10.5834	0.975	ABCA3	ATP binding cassette subfamily A member 3
8099967	1.36e-07	4.27e-09	-8.86	10.5771	-1.29	RBM47	RNA binding motif protein 47
8170863	1.36e-07	4.28e-09	8.86	10.5753	1.34	SNORA70///RPL10	small nucleolar RNA, H/ACA box 70///ribosomal protein L10
7963774	1.36e-07	4.3e-09	8.86	10.5697	0.764	ZNF385A	zinc finger protein 385A
7894367	1.38e-07	4.35e-09	-8.86	10.5597	-1.56
8114778	1.39e-07	4.4e-09	-8.85	10.548	-1.76	LOC729080///GCSH	glycine cleavage system protein H (aminomethyl carrier) pseudogene///glycine cleavage system protein H
7923824	1.39e-07	4.4e-09	-8.85	10.5469	-1.05	SLC41A1	solute carrier family 41 member 1
8039257	1.43e-07	4.52e-09	8.84	10.5196	2.11	LAIR1	leukocyte associated immunoglobulin like receptor 1
8093578	1.43e-07	4.54e-09	-8.84	10.5166	-0.721	NAT8L	N-acetyltransferase 8 like
8153625	1.48e-07	4.69e-09	-8.82	10.4829	-0.543	OPLAH	5-oxoprolinase (ATP-hydrolysing)
8002999	1.48e-07	4.69e-09	-8.82	10.4818	-1.85	GCSHP3///LOC729080///GCSH	glycine cleavage system protein H pseudogene 3///glycine cleavage system protein H (aminomethyl carrier) pseudogene///glycine cleavage system protein H
7922610	1.49e-07	4.72e-09	8.82	10.4751	1.25	ABL2	ABL proto-oncogene 2, non-receptor tyrosine kinase
8001918	1.49e-07	4.75e-09	8.81	10.4701	1.48	RRAD	RRAD, Ras related glycolysis inhibitor and calcium channel regulator
7976726	1.5e-07	4.77e-09	8.81	10.4643	0.968	EVL	Enah/Vasp-like
8139033	1.5e-07	4.77e-09	8.81	10.4642	2.4	AOAH	acyloxyacyl hydrolase
8099541	1.5e-07	4.8e-09	-8.81	10.4589	-2.39	QDPR	quinoid dihydropteridine reductase
8160663	1.51e-07	4.82e-09	-8.81	10.4537	-1.47	AQP7	aquaporin 7
7913883	1.51e-07	4.83e-09	-8.81	10.4529	-1.23	PAFAH2	platelet activating factor acetylhydrolase 2
8175052	1.51e-07	4.83e-09	-8.81	10.4526	-2.43	AIFM1	apoptosis inducing factor, mitochondria associated 1
8043100	1.54e-07	4.93e-09	8.8	10.4317	1.61	TMSB10	thymosin beta 10
7930894	1.55e-07	4.96e-09	8.79	10.4255	1.91	GRK5	G protein-coupled receptor kinase 5
7970569	1.56e-07	5.01e-09	8.79	10.4156	1.59	SACS	sacsin molecular chaperone
8172333	1.56e-07	5.01e-09	8.79	10.415	0.695	CFP	complement factor properdin
8134552	1.56e-07	5.02e-09	8.79	10.414	1.62	ARPC1B	actin related protein 2/3 complex subunit 1B
8038824	1.56e-07	5.02e-09	8.79	10.4128	1.12	SIGLEC10	sialic acid binding Ig like lectin 10
8102249	1.57e-07	5.05e-09	-8.79	10.4071	-1.35	ETNPPL	ethanolamine-phosphate phospho-lyase
8065580	1.61e-07	5.2e-09	-8.77	10.3769	-0.721	DUSP15	dual specificity phosphatase 15
8087611	1.63e-07	5.27e-09	-8.77	10.3638	-1.76	HYAL1	hyaluronoglucosaminidase 1
7940717	1.63e-07	5.28e-09	-8.76	10.361	-1.26	SLC3A2	solute carrier family 3 member 2
7942596	1.63e-07	5.29e-09	8.76	10.3604	1.52	SERPINH1	serpin family H member 1
8037374	1.64e-07	5.31e-09	8.76	10.3561	2.01	PLAUR	plasminogen activator, urokinase receptor
7909214	1.64e-07	5.32e-09	8.76	10.353	1.44	RASSF5	Ras association domain family member 5
8127534	1.65e-07	5.36e-09	8.76	10.3468	1.43	MB21D1	Mab-21 domain containing 1
7915971	1.65e-07	5.37e-09	-8.76	10.3447	-1.13	AGBL4	ATP/GTP binding protein like 4
8086615	1.65e-07	5.38e-09	-8.76	10.3431	-1.66	LRRC2	leucine rich repeat containing 2
7962083	1.68e-07	5.46e-09	-8.75	10.3281	-0.654
8059854	1.68e-07	5.48e-09	8.75	10.3239	1.39	ARL4C	ADP ribosylation factor like GTPase 4C
8016552	1.71e-07	5.59e-09	-8.74	10.3041	-1.05	PHB	prohibitin
7940147	1.72e-07	5.61e-09	8.74	10.3002	1.82	FAM111B	family with sequence similarity 111 member B
8165538	1.75e-07	5.71e-09	-8.73	10.2822	-0.57	ENTPD8	ectonucleoside triphosphate diphosphohydrolase 8
7901046	1.77e-07	5.8e-09	8.72	10.2666	0.794	SNORD55	small nucleolar RNA, C/D box 55
7952022	1.77e-07	5.8e-09	8.72	10.2665	1.85	JAML	junction adhesion molecule like
8175933	1.79e-07	5.85e-09	-8.72	10.2575	-1.88	RENBP	renin binding protein
8092083	1.79e-07	5.86e-09	-8.72	10.256	-3.24	SLC2A2	solute carrier family 2 member 2
7958960	1.79e-07	5.88e-09	-8.71	10.2527	-1.51	TPCN1	two pore segment channel 1
7892633	1.81e-07	5.95e-09	8.71	10.2401	1.2
8032871	1.81e-07	5.95e-09	8.71	10.2393	0.943	DPP9	dipeptidyl peptidase 9
8065948	1.81e-07	5.96e-09	8.71	10.2387	1.14	FER1L4	fer-1 like family member 4, pseudogene
8143270	1.81e-07	5.96e-09	8.71	10.2386	1.38	ZC3HAV1L	zinc finger CCCH-type containing, antiviral 1 like
8145470	1.86e-07	6.13e-09	8.69	10.2095	1.15	DPYSL2	dihydropyrimidinase like 2
7964548	1.86e-07	6.13e-09	-8.69	10.2093	-0.943	METTL1	methyltransferase like 1
7898793	1.87e-07	6.16e-09	8.69	10.2044	2.26	C1QA	complement C1q A chain
7972936	1.89e-07	6.23e-09	8.69	10.1933	1.61	TMEM255B	transmembrane protein 255B
8119132	1.9e-07	6.27e-09	8.68	10.1858	1.14	FGD2	FYVE, RhoGEF and PH domain containing 2
7947570	1.94e-07	6.44e-09	8.67	10.1601	1.31	TP53I11	tumor protein p53 inducible protein 11
8061579	1.95e-07	6.47e-09	8.67	10.1541	1.63	TPX2	TPX2, microtubule nucleation factor
8091715	1.97e-07	6.54e-09	8.66	10.1441	1.39	LXN	latexin
7912863	2.01e-07	6.67e-09	-8.66	10.1232	-2	MST1L///MST1P2///MST1	macrophage stimulating 1 like///macrophage stimulating 1 pseudogene 2///macrophage stimulating 1
7961710	2.03e-07	6.75e-09	8.65	10.1114	2.02	ABCC9	ATP binding cassette subfamily C member 9
7958761	2.04e-07	6.79e-09	-8.65	10.1055	-1.69	ACAD10	acyl-CoA dehydrogenase family member 10
8035456	2.04e-07	6.79e-09	8.65	10.1054	1.15	LRRC25	leucine rich repeat containing 25
7913385	2.04e-07	6.79e-09	-8.65	10.1049	-2.59	RAP1GAP	RAP1 GTPase activating protein
8116272	2.04e-07	6.81e-09	8.65	10.1028	1.77	ADAMTS2	ADAM metallopeptidase with thrombospondin type 1 motif 2
8050102	2.05e-07	6.84e-09	8.64	10.0977	0.818	CMPK2	cytidine/uridine monophosphate kinase 2
8008784	2.05e-07	6.85e-09	8.64	10.0966	1.68	PRR11	proline rich 11
8022295	2.05e-07	6.86e-09	8.64	10.0947	2.16	PIEZO2	piezo type mechanosensitive ion channel component 2
7895510	2.09e-07	6.99e-09	8.63	10.0759	0.649
7966026	2.09e-07	7.01e-09	8.63	10.0734	1.95	NUAK1	NUAK family kinase 1
7960874	2.12e-07	7.09e-09	8.63	10.0613	2.14	C3AR1	complement component 3a receptor 1
8167369	2.16e-07	7.23e-09	-8.62	10.041	-1.32	HDAC6	histone deacetylase 6
8162884	2.17e-07	7.29e-09	-8.61	10.0333	-4.9	ALDOB	aldolase, fructose-bisphosphate B
7953428	2.2e-07	7.38e-09	8.61	10.0209	1.99	CD4	CD4 molecule
7928126	2.22e-07	7.47e-09	8.6	10.0089	1.28	PALD1	phosphatase domain containing, paladin 1
8115490	2.25e-07	7.59e-09	8.6	9.99164	1.77	ADAM19	ADAM metallopeptidase domain 19
8026315	2.25e-07	7.6e-09	8.6	9.99112	1.04	PKN1	protein kinase N1
8054439	2.26e-07	7.62e-09	8.59	9.9884	0.673	ST6GAL2	ST6 beta-galactoside alpha-2,6-sialyltransferase 2
8130811	2.26e-07	7.62e-09	-8.59	9.98747	-0.975	LOC441179///LINC01558	uncharacterized LOC441179///long intergenic non-protein coding RNA 1558
8130982	2.26e-07	7.62e-09	-8.59	9.98747	-0.975	LOC441179///LINC01558	uncharacterized LOC441179///long intergenic non-protein coding RNA 1558
8159501	2.29e-07	7.76e-09	-8.59	9.96987	-0.488	LCN12	lipocalin 12
8018177	2.29e-07	7.77e-09	8.58	9.96872	1.01	CD300C	CD300c molecule
8014257	2.3e-07	7.79e-09	8.58	9.96611	1.41	SLFN12L	schlafen family member 12 like
7955943	2.3e-07	7.79e-09	8.58	9.96589	1.52	PDE1B	phosphodiesterase 1B
7938269	2.31e-07	7.85e-09	-8.58	9.95785	-1.32	TUB	tubby bipartite transcription factor
7957654	2.34e-07	7.95e-09	-8.57	9.94478	-2.06	AMDHD1	amidohydrolase domain containing 1
8058552	2.34e-07	7.96e-09	-8.57	9.94315	-1.59	IDH1	isocitrate dehydrogenase (NADP(+)) 1, cytosolic
7981530	2.37e-07	8.06e-09	8.57	9.93142	0.981	GPR132	G protein-coupled receptor 132
8075263	2.37e-07	8.08e-09	-8.57	9.92795	-1.66	NIPSNAP1	nipsnap homolog 1 (C. elegans)
7967493	2.37e-07	8.09e-09	8.57	9.92702	0.963	NCOR2	nuclear receptor corepressor 2
7945321	2.38e-07	8.11e-09	-8.56	9.92399	-2.09	GLB1L2	galactosidase beta 1 like 2
7990736	2.41e-07	8.25e-09	8.56	9.90714	0.813	ADAMTS7	ADAM metallopeptidase with thrombospondin type 1 motif 7
8099172	2.41e-07	8.25e-09	8.56	9.90664	0.743	CRMP1	collapsin response mediator protein 1
8116086	2.41e-07	8.26e-09	8.56	9.90639	0.846	DOK3	docking protein 3
8055872	2.42e-07	8.29e-09	-8.55	9.90183	-0.769	CACNB4	calcium voltage-gated channel auxiliary subunit beta 4
7988467	2.43e-07	8.34e-09	8.55	9.89609	2.48	FBN1	fibrillin 1
8081826	2.43e-07	8.35e-09	-8.55	9.89498	-2.83	UPK1B	uroplakin 1B
8030362	2.46e-07	8.45e-09	8.55	9.88233	1.19	SNORD33	small nucleolar RNA, C/D box 33
8030007	2.47e-07	8.47e-09	8.54	9.88008	1.93	EMP3	epithelial membrane protein 3
7913146	2.48e-07	8.51e-09	-8.54	9.87531	-2.24	AKR7A3	aldo-keto reductase family 7 member A3
7981059	2.48e-07	8.55e-09	-8.54	9.87098	-2.81	SERPINA6	serpin family A member 6
7918936	2.48e-07	8.55e-09	-8.54	9.87019	-2.55	VTCN1	V-set domain containing T cell activation inhibitor 1
7909568	2.49e-07	8.59e-09	8.54	9.86576	1.82	DTL	denticleless E3 ubiquitin protein ligase homolog
8166065	2.52e-07	8.7e-09	8.53	9.85276	1.15	TLR8	toll like receptor 8
7906330	2.53e-07	8.73e-09	8.53	9.85004	1.3	CD1D	CD1d molecule
8039144	2.53e-07	8.73e-09	-8.53	9.84967	-2.18	TMC4	transmembrane channel like 4
7932094	2.58e-07	8.92e-09	-8.52	9.82714	-2.51	PHYH	phytanoyl-CoA 2-hydroxylase
7976443	2.6e-07	8.99e-09	8.52	9.81936	1.39	IFI27	interferon alpha inducible protein 27
7913682	2.6e-07	9e-09	-8.52	9.81817	-2.01	HMGCL	3-hydroxymethyl-3-methylglutaryl-CoA lyase
8002778	2.6e-07	9.02e-09	8.52	9.816	1.88	MLKL	mixed lineage kinase domain like
8166335	2.6e-07	9.02e-09	-8.52	9.81599	-1.45	PDHA1	pyruvate dehydrogenase (lipoamide) alpha 1
8149071	2.65e-07	9.22e-09	8.51	9.79387	4.35	ANGPT2	angiopoietin 2
7976080	2.65e-07	9.22e-09	8.51	9.79376	1.83	GPR65	G protein-coupled receptor 65
8096130	2.67e-07	9.3e-09	-8.5	9.78552	-1.13	CDS1	CDP-diacylglycerol synthase 1
8145532	2.69e-07	9.36e-09	-8.5	9.7788	-3.32	EPHX2	epoxide hydrolase 2
8072170	2.7e-07	9.42e-09	-8.5	9.77179	-1.14	KREMEN1	kringle containing transmembrane protein 1
8129637	2.78e-07	9.72e-09	8.48	9.74064	0.937	VNN2	vanin 2
8114068	2.8e-07	9.79e-09	8.48	9.7332	0.521	SHROOM1	shroom family member 1
7975607	2.81e-07	9.84e-09	-8.48	9.72755	-1.31	ACOT4	acyl-CoA thioesterase 4
8071371	2.82e-07	9.89e-09	-8.47	9.72226	-0.483
8071543	2.82e-07	9.89e-09	-8.47	9.72226	-0.483
8074746	2.82e-07	9.89e-09	-8.47	9.72226	-0.483
8127563	2.83e-07	9.92e-09	8.47	9.71922	1.85	COL12A1	collagen type XII alpha 1 chain
7941946	2.85e-07	9.99e-09	-8.47	9.71215	-0.948	NDUFV1	NADH:ubiquinone oxidoreductase core subunit V1
8073088	2.87e-07	1.01e-08	8.46	9.70316	1.63	APOBEC3G	apolipoprotein B mRNA editing enzyme catalytic subunit 3G
8052669	2.89e-07	1.02e-08	8.46	9.69439	0.999	SERTAD2	SERTA domain containing 2
8083546	2.94e-07	1.03e-08	8.45	9.67735	1.95	KCNAB1	potassium voltage-gated channel subfamily A member regulatory beta subunit 1
8007388	2.95e-07	1.04e-08	-8.45	9.67354	-0.828	CNTD1///BECN1	cyclin N-terminal domain containing 1///beclin 1
8023175	2.95e-07	1.04e-08	-8.45	9.67036	-0.84	IER3IP1	immediate early response 3 interacting protein 1
7919251	3e-07	1.06e-08	-8.44	9.65345	-1.72	GPR89A///GPR89B	G protein-coupled receptor 89A///G protein-coupled receptor 89B
7994541	3.01e-07	1.06e-08	8.44	9.6479	0.786	LAT	linker for activation of T-cells
8068761	3.02e-07	1.07e-08	8.44	9.64507	1.46	ABCG1	ATP binding cassette subfamily G member 1
8046546	3.02e-07	1.07e-08	-8.44	9.6436	-1.38	HOXD8	homeobox D8
7904742	3.03e-07	1.07e-08	8.44	9.64056	0.922	LIX1L	limb and CNS expressed 1 like
8082905	3.03e-07	1.07e-08	8.44	9.64003	0.731	SLC35G2	solute carrier family 35 member G2
8108744	3.12e-07	1.11e-08	8.42	9.60889	1.29	PCDHB14	protocadherin beta 14
7945245	3.2e-07	1.14e-08	8.41	9.58184	1.52	NTM	neurotrimin
8045287	3.22e-07	1.14e-08	-8.41	9.57553	-1.27
7963061	3.25e-07	1.16e-08	8.4	9.56433	1.84	C1QL4	complement C1q like 4
8071907	3.26e-07	1.16e-08	-8.4	9.55916	-2.25	UPB1	beta-ureidopropionase 1
8112376	3.28e-07	1.17e-08	8.4	9.55259	1.96	CENPK	centromere protein K
8038213	3.28e-07	1.17e-08	-8.4	9.55178	-1.69	HSD17B14	hydroxysteroid 17-beta dehydrogenase 14
7894529	3.28e-07	1.17e-08	-8.4	9.55036	-1.85
8002152	3.33e-07	1.19e-08	8.39	9.53377	0.911	SLC12A4	solute carrier family 12 member 4
7919133	3.34e-07	1.19e-08	8.39	9.52992	2.27	FCGR1CP///FCGR1B///FCGR1A	Fc fragment of IgG receptor Ic, pseudogene///Fc fragment of IgG receptor Ib///Fc fragment of IgG receptor Ia
8159078	3.34e-07	1.2e-08	-8.39	9.52911	-0.693	CACFD1	calcium channel flower domain containing 1
8016473	3.34e-07	1.2e-08	-8.39	9.52854	-0.908	HOXB8	homeobox B8
8012558	3.34e-07	1.2e-08	8.39	9.52718	1.15	PIK3R5	phosphoinositide-3-kinase regulatory subunit 5
8061416	3.38e-07	1.21e-08	8.38	9.5147	1.18	CST7	cystatin F
7988852	3.4e-07	1.22e-08	-8.38	9.50908	-1.69	BCL2L10	BCL2 like 10
8170921	3.44e-07	1.23e-08	8.37	9.49706	1.18	PLXNA3	plexin A3
7946306	3.49e-07	1.25e-08	-8.36	9.48027	-1.46	OVCH2	ovochymase 2 (gene/pseudogene)
8122343	3.53e-07	1.27e-08	8.36	9.46749	1	HECA	hdc homolog, cell cycle regulator
8030582	3.53e-07	1.27e-08	-8.36	9.46684	-0.974	MYH14	myosin, heavy chain 14, non-muscle
8084206	3.57e-07	1.28e-08	8.35	9.4559	1.42	B3GNT5	UDP-GlcNAc:betaGal beta-1,3-N-acetylglucosaminyltransferase 5
8112980	3.61e-07	1.3e-08	8.35	9.44253	2.3	EDIL3	EGF like repeats and discoidin domains 3
7939620	3.69e-07	1.33e-08	-8.34	9.41953	-1.54	LARGE2	LARGE xylosyl- and glucuronyltransferase 2
8017599	3.69e-07	1.33e-08	8.34	9.41858	2.16	PECAM1	platelet and endothelial cell adhesion molecule 1
8115783	3.7e-07	1.34e-08	8.34	9.41505	1.54	STK10	serine/threonine kinase 10
8173600	3.7e-07	1.34e-08	-8.33	9.41279	-1.87	NAP1L2	nucleosome assembly protein 1 like 2
7937735	3.72e-07	1.35e-08	8.33	9.40705	1.19	LSP1	lymphocyte-specific protein 1
7988990	3.77e-07	1.37e-08	-8.33	9.39372	-3.76	WDR72	WD repeat domain 72
8062823	3.78e-07	1.37e-08	-8.32	9.38864	-2.89	HNF4A	hepatocyte nuclear factor 4 alpha
8152264	3.83e-07	1.39e-08	-8.32	9.37579	-3.07	DPYS	dihydropyrimidinase
8100338	3.84e-07	1.4e-08	-8.32	9.37224	-1.46	ERVMER34-1	endogenous retrovirus group MER34 member 1
8111922	3.85e-07	1.4e-08	8.31	9.3676	1.05	LOC648987	uncharacterized LOC648987
8096281	3.88e-07	1.41e-08	8.31	9.36008	2.11	IBSP	integrin binding sialoprotein
8095159	3.91e-07	1.42e-08	8.31	9.35114	1.16
7905060	3.91e-07	1.43e-08	8.31	9.35021	2.24	FCGR1CP///FCGR1B///FCGR1A	Fc fragment of IgG receptor Ic, pseudogene///Fc fragment of IgG receptor Ib///Fc fragment of IgG receptor Ia
8114536	3.92e-07	1.43e-08	8.3	9.34712	1.46	TMEM173	transmembrane protein 173
8038487	3.92e-07	1.43e-08	8.3	9.34648	0.749	IL4I1///NUP62	interleukin 4 induced 1///nucleoporin 62
7963046	3.94e-07	1.44e-08	8.3	9.34073	0.799	TUBA1B	tubulin alpha 1b
7964271	3.97e-07	1.45e-08	8.3	9.33084	0.617	PRIM1	primase (DNA) subunit 1
8175900	4.01e-07	1.47e-08	8.29	9.31999	0.976	ARHGAP4	Rho GTPase activating protein 4
8017019	4.01e-07	1.47e-08	-8.29	9.31947	-1.09	MTMR4	myotubularin related protein 4
8142993	4.06e-07	1.49e-08	-8.29	9.30576	-0.508
8114002	4.07e-07	1.49e-08	-8.28	9.30224	-2.13
7985224	4.08e-07	1.5e-08	8.28	9.30003	1.71	LOC646938///TBC1D2B	TBC1 domain family member 2B pseudogene///TBC1 domain family member 2B
7916506	4.08e-07	1.5e-08	-8.28	9.29759	-2.05	C1orf168	chromosome 1 open reading frame 168
7895392	4.08e-07	1.5e-08	8.28	9.29729	0.688
8041542	4.09e-07	1.51e-08	-8.28	9.29337	-2.78	GALM///GALM	galactose mutarotase///galactose mutarotase
7971077	4.09e-07	1.51e-08	8.28	9.29287	2.02	POSTN	periostin
7972016	4.13e-07	1.52e-08	-8.28	9.28236	-2.43
7948364	4.15e-07	1.53e-08	8.27	9.2765	2.05	MPEG1	macrophage expressed 1
8146863	4.15e-07	1.53e-08	8.27	9.27585	1.78	SULF1	sulfatase 1
7951351	4.18e-07	1.55e-08	8.27	9.26764	2.47	PDGFD	platelet derived growth factor D
8032608	4.21e-07	1.56e-08	-8.27	9.26025	-1.41	MFSD12	major facilitator superfamily domain containing 12
8094056	4.22e-07	1.56e-08	8.26	9.25562	0.799	HTRA3	HtrA serine peptidase 3
8127370	4.3e-07	1.59e-08	-8.26	9.23645	-0.913	KHDRBS2	KH RNA binding domain containing, signal transduction associated 2
8146921	4.34e-07	1.61e-08	-8.25	9.22563	-1.65	RDH10	retinol dehydrogenase 10 (all-trans)
8080438	4.37e-07	1.62e-08	-8.25	9.21881	-0.827	GLT8D1///SPCS1	glycosyltransferase 8 domain containing 1///signal peptidase complex subunit 1
8088680	4.45e-07	1.65e-08	8.24	9.2005	1.62	EOGT	EGF domain specific O-linked N-acetylglucosamine transferase
7948176	4.46e-07	1.66e-08	8.24	9.19691	0.903	TNKS1BP1	tankyrase 1 binding protein 1
8025058	4.49e-07	1.67e-08	8.23	9.18943	1.05	TRIP10	thyroid hormone receptor interactor 10
7935058	4.5e-07	1.67e-08	8.23	9.18659	1.71	MYOF	myoferlin
7901050	4.6e-07	1.71e-08	8.22	9.16271	0.718	SNORD38A	small nucleolar RNA, C/D box 38A
8061668	4.63e-07	1.73e-08	8.22	9.15439	2.08	HCK	HCK proto-oncogene, Src family tyrosine kinase
7937852	4.64e-07	1.73e-08	-8.22	9.15129	-1.77	SLC22A18	solute carrier family 22 member 18
8089970	4.65e-07	1.74e-08	-8.22	9.1495	-1.48	ILDR1	immunoglobulin like domain containing receptor 1
7961891	4.65e-07	1.74e-08	8.22	9.14829	2.03	BHLHE41	basic helix-loop-helix family member e41
8136557	4.67e-07	1.75e-08	8.21	9.1433	1.53	TBXAS1	thromboxane A synthase 1
8117034	4.7e-07	1.76e-08	-8.21	9.13637	-1.88	GMPR	guanosine monophosphate reductase
8113773	4.7e-07	1.76e-08	-8.21	9.13415	-1.96	ALDH7A1	aldehyde dehydrogenase 7 family member A1
8150076	4.74e-07	1.78e-08	8.21	9.12553	0.911	DUSP4	dual specificity phosphatase 4
8138600	4.74e-07	1.78e-08	-8.21	9.12438	-1.43
8082314	4.75e-07	1.79e-08	8.2	9.12121	1.34	PLXNA1	plexin A1
8012539	4.81e-07	1.81e-08	8.2	9.10872	1.07	PIK3R6	phosphoinositide-3-kinase regulatory subunit 6
8106354	4.86e-07	1.83e-08	-8.19	9.09628	-1.85	IQGAP2	IQ motif containing GTPase activating protein 2
8043945	4.89e-07	1.84e-08	8.19	9.09036	1.7	MAP4K4	mitogen-activated protein kinase kinase kinase kinase 4
8012906	4.89e-07	1.84e-08	8.19	9.08912	1.29
8020795	4.95e-07	1.87e-08	-8.18	9.07511	-1.06	TTR	transthyretin
8018966	4.97e-07	1.88e-08	8.18	9.06977	1.37	TIMP2	TIMP metallopeptidase inhibitor 2
8068952	4.99e-07	1.88e-08	-8.18	9.06592	-1.19	AGPAT3	1-acylglycerol-3-phosphate O-acyltransferase 3
8022283	4.99e-07	1.89e-08	8.18	9.06555	2.1	PIEZO2	piezo type mechanosensitive ion channel component 2
8100109	4.99e-07	1.89e-08	-8.18	9.06329	-2.19	GABRA2	gamma-aminobutyric acid type A receptor alpha2 subunit
8041853	5.01e-07	1.9e-08	-8.18	9.05895	-2.91	EPCAM	epithelial cell adhesion molecule
8112519	5.01e-07	1.9e-08	8.18	9.05792	1.37
7896722	5.01e-07	1.9e-08	8.18	9.05634	0.967
7928736	5.01e-07	1.9e-08	8.18	9.05616	1.15	NRG3	neuregulin 3
8029465	5.03e-07	1.91e-08	8.17	9.05176	1.05	BCL3	B-cell CLL/lymphoma 3
8102938	5.05e-07	1.92e-08	-8.17	9.04762	-1.21	RNF150	ring finger protein 150
8100768	5.05e-07	1.92e-08	-8.17	9.04707	-2.46	UGT2B28///UGT2B11///UGT2B10	UDP glucuronosyltransferase family 2 member B28///UDP glucuronosyltransferase family 2 member B11///UDP glucuronosyltransferase family 2 member B10
8099326	5.14e-07	1.96e-08	-8.16	9.02726	-2.2	SLC2A9	solute carrier family 2 member 9
8104506	5.15e-07	1.96e-08	8.16	9.02455	1.14	TRIO	trio Rho guanine nucleotide exchange factor
7982070	5.21e-07	1.99e-08	-8.16	9.01282	-2.02	SNORD115-32	small nucleolar RNA, C/D box 115-32
8118932	5.32e-07	2.03e-08	8.15	8.9902	0.624	DEF6	DEF6, guanine nucleotide exchange factor
7999008	5.32e-07	2.03e-08	8.15	8.98955	0.472	SLX4	SLX4 structure-specific endonuclease subunit
7900095	5.36e-07	2.05e-08	8.14	8.9804	0.684	MAP7D1	MAP7 domain containing 1
8133258	5.37e-07	2.05e-08	-8.14	8.97897	-0.934	WBSCR17	Williams-Beuren syndrome chromosome region 17
7951485	5.39e-07	2.06e-08	-8.14	8.97366	-0.802	SLC35F2	solute carrier family 35 member F2
7982868	5.42e-07	2.08e-08	-8.14	8.96783	-0.901	CHAC1	ChaC glutathione specific gamma-glutamylcyclotransferase 1
8007493	5.43e-07	2.08e-08	-8.13	8.9651	-1.52	ARL4D	ADP ribosylation factor like GTPase 4D
8103240	5.45e-07	2.09e-08	8.13	8.96056	0.759	ANXA2P1	annexin A2 pseudogene 1
7974425	5.46e-07	2.1e-08	8.13	8.95691	0.944	SAMD4A	sterile alpha motif domain containing 4A
8073842	5.47e-07	2.1e-08	-8.13	8.95482	-2.09	TTC38	tetratricopeptide repeat domain 38
8178220	5.5e-07	2.12e-08	8.13	8.94798	1.4	HLA-DPB1	major histocompatibility complex, class II, DP beta 1
8063796	5.51e-07	2.12e-08	8.13	8.94627	1.98	CDH4	cadherin 4
7894655	5.54e-07	2.14e-08	8.12	8.93901	1.15
8027584	5.59e-07	2.16e-08	8.12	8.92836	1.12	KCTD15	potassium channel tetramerization domain containing 15
7940851	5.6e-07	2.16e-08	-8.12	8.92616	-0.749	FLRT1	fibronectin leucine rich transmembrane protein 1
7956819	5.66e-07	2.19e-08	8.11	8.91548	1.59	RASSF3	Ras association domain family member 3
7938989	5.79e-07	2.24e-08	-8.1	8.89061	-1.39	GAS2	growth arrest specific 2
8161701	5.87e-07	2.27e-08	8.1	8.87647	1.6	TMEM2	transmembrane protein 2
7941401	5.89e-07	2.28e-08	-8.09	8.87268	-1.1	OVOL1	ovo like transcriptional repressor 1
8073056	5.89e-07	2.28e-08	8.09	8.8719	0.604	APOBEC3A_B///APOBEC3A	APOBEC3A and APOBEC3B deletion hybrid///apolipoprotein B mRNA editing enzyme catalytic subunit 3A
7945377	5.89e-07	2.29e-08	-8.09	8.86969	-1.44	SIGIRR	single Ig and TIR domain containing
8138640	5.89e-07	2.29e-08	-8.09	8.86912	-0.838	CYCS	cytochrome c, somatic
7991846	5.92e-07	2.3e-08	-8.09	8.86406	-0.973	DECR2	2,4-dienoyl-CoA reductase 2, peroxisomal
8125373	5.93e-07	2.31e-08	8.09	8.85998	1.19	GPSM3///NOTCH4	G-protein signaling modulator 3///notch 4
8179987	5.93e-07	2.31e-08	8.09	8.85998	1.19	GPSM3///NOTCH4	G-protein signaling modulator 3///notch 4
8098163	5.93e-07	2.31e-08	8.09	8.85925	0.786
8151421	5.97e-07	2.33e-08	-8.08	8.85189	-0.744
8054329	5.99e-07	2.33e-08	8.08	8.84871	0.875	RNF149	ring finger protein 149
8026051	5.99e-07	2.34e-08	8.08	8.84788	0.554	RNASEH2A	ribonuclease H2 subunit A
8102482	6.06e-07	2.36e-08	8.08	8.83513	1.55	SEC24D	SEC24 homolog D, COPII coat complex component
8148501	6.11e-07	2.39e-08	8.07	8.82551	1.92	PTP4A3	protein tyrosine phosphatase type IVA, member 3
8093500	6.15e-07	2.4e-08	8.07	8.81811	0.928	TACC3	transforming acidic coiled-coil containing protein 3
8123929	6.22e-07	2.43e-08	-8.06	8.80636	-0.678	ERVFRD-1	endogenous retrovirus group FRD member 1
7966779	6.25e-07	2.45e-08	-8.06	8.80073	-1.75	NOS1	nitric oxide synthase 1
8105153	6.27e-07	2.46e-08	-8.06	8.79611	-1.39	NNT	nicotinamide nucleotide transhydrogenase
8038874	6.27e-07	2.46e-08	-8.06	8.7952	-0.64	LOC100132800///LINC01530	uncharacterized LOC100132800///long intergenic non-protein coding RNA 1530
7958895	6.63e-07	2.6e-08	8.03	8.73702	1.53	OAS3	2'-5'-oligoadenylate synthetase 3
7996211	6.72e-07	2.64e-08	8.03	8.72366	0.581	GINS3	GINS complex subunit 3
8026513	6.73e-07	2.64e-08	8.03	8.72131	0.673	TPM4	tropomyosin 4
7952986	6.79e-07	2.67e-08	-8.02	8.71163	-1.8	WNK1	WNK lysine deficient protein kinase 1
8005529	6.84e-07	2.69e-08	-8.02	8.70279	-2	SLC5A10	solute carrier family 5 member 10
8113130	6.87e-07	2.71e-08	8.02	8.69689	2.06	MCTP1	multiple C2 and transmembrane domain containing 1
8008372	6.92e-07	2.73e-08	-8.01	8.68878	-0.848	EPN3	epsin 3
8075910	6.93e-07	2.74e-08	8.01	8.68695	2.11	RAC2	ras-related C3 botulinum toxin substrate 2 (rho family, small GTP binding protein Rac2)
8014025	7e-07	2.76e-08	-8.01	8.6763	-1.35	TMIGD1	transmembrane and immunoglobulin domain containing 1
7892608	7e-07	2.77e-08	8.01	8.6742	0.737
7894840	7e-07	2.77e-08	8.01	8.6742	0.737
7982084	7.04e-07	2.79e-08	-8	8.66796	-2.87	SNORD115-44///SNORD115-43///SNORD115-41///SNORD115-39///SNORD115-38///SNORD115-36///SNORD115-33///SNORD115-31///SNORD115-29///SNORD115-26///SNORD115-22///SNORD115-16///SNORD115-14///SNORD115-11///SNORD115-3	small nucleolar RNA, C/D box 115-44///small nucleolar RNA, C/D box 115-43///small nucleolar RNA, C/D box 115-41///small nucleolar RNA, C/D box 115-39///small nucleolar RNA, C/D box 115-38///small nucleolar RNA, C/D box 115-36///small nucleolar RNA, C/D box 115-33///small nucleolar RNA, C/D box 115-31///small nucleolar RNA, C/D box 115-29///small nucleolar RNA, C/D box 115-26///small nucleolar RNA…
7943605	7.05e-07	2.79e-08	-8	8.66578	-2.03	ACAT1	acetyl-CoA acetyltransferase 1
8111512	7.07e-07	2.8e-08	-8	8.66165	-2.92	UGT3A1	UDP glycosyltransferase family 3 member A1
7995838	7.1e-07	2.82e-08	-8	8.65758	-1.82	MT1X	metallothionein 1X
7906642	7.13e-07	2.83e-08	-8	8.65248	-0.907	KLHDC9	kelch domain containing 9
8148003	7.14e-07	2.84e-08	-8	8.65009	-1.37	SLC30A8	solute carrier family 30 member 8
8045768	7.17e-07	2.85e-08	7.99	8.64462	0.969	ARL6IP6	ADP ribosylation factor like GTPase 6 interacting protein 6
7938777	7.18e-07	2.86e-08	7.99	8.64268	0.794	LDHA	lactate dehydrogenase A
8025004	7.19e-07	2.86e-08	-7.99	8.64081	-1.06	CAPS	calcyphosine
8137783	7.22e-07	2.88e-08	-7.99	8.6347	-0.769	TMEM184A	transmembrane protein 184A
7979574	7.29e-07	2.91e-08	-7.99	8.62533	-1.11	SGPP1	sphingosine-1-phosphate phosphatase 1
8153167	7.33e-07	2.92e-08	7.98	8.61895	1.23	KCNK9	potassium two pore domain channel subfamily K member 9
7981427	7.33e-07	2.93e-08	-7.98	8.61833	-1.44	CKB	creatine kinase B
8015712	7.36e-07	2.94e-08	-7.98	8.61316	-1.01	COA3	cytochrome c oxidase assembly factor 3
7959402	7.38e-07	2.95e-08	-7.98	8.60964	-0.645	B3GNT4	UDP-GlcNAc:betaGal beta-1,3-N-acetylglucosaminyltransferase 4
7942717	7.4e-07	2.96e-08	-7.98	8.60546	-1.13	MYO7A	myosin VIIA
7975076	7.41e-07	2.97e-08	-7.98	8.60363	-1.82	HSPA2	heat shock protein family A (Hsp70) member 2
8130732	7.42e-07	2.98e-08	-7.97	8.60086	-1.83	MPC1	mitochondrial pyruvate carrier 1
7980051	7.51e-07	3.01e-08	7.97	8.58891	0.89	ELMSAN1	ELM2 and Myb/SANT domain containing 1
7933537	7.52e-07	3.02e-08	-7.97	8.58687	-3.21	OGDHL	oxoglutarate dehydrogenase-like
7909708	7.56e-07	3.04e-08	7.97	8.58043	1.49	CENPF	centromere protein F
7973510	7.57e-07	3.04e-08	-7.96	8.57806	-1.21	CPNE6	copine 6
7956018	7.67e-07	3.09e-08	-7.96	8.56327	-0.926	RDH5	retinol dehydrogenase 5
7896710	7.72e-07	3.11e-08	7.96	8.55696	1.18
8138381	7.79e-07	3.14e-08	-7.95	8.54629	-1.12	AGR2	anterior gradient 2, protein disulphide isomerase family member
7914212	7.81e-07	3.15e-08	7.95	8.54356	1.68	SNORA61///SNHG12	small nucleolar RNA, H/ACA box 61///small nucleolar RNA host gene 12
7929816	7.81e-07	3.15e-08	7.95	8.54278	2.05	SCD	stearoyl-CoA desaturase
7990757	7.88e-07	3.18e-08	-7.94	8.53214	-1.79	CTSH	cathepsin H
8108006	7.89e-07	3.19e-08	-7.94	8.53072	-1.99	LEAP2	liver enriched antimicrobial peptide 2
7985767	7.95e-07	3.22e-08	7.94	8.52189	0.804	AEN	apoptosis enhancing nuclease
8151101	7.95e-07	3.22e-08	7.94	8.52133	2.5	MYBL1	MYB proto-oncogene like 1
7923164	7.95e-07	3.22e-08	-7.94	8.52079	-1.66	ATP6V1G3	ATPase H+ transporting V1 subunit G3
8094609	7.98e-07	3.24e-08	7.94	8.51588	0.99	FAM114A1	family with sequence similarity 114 member A1
7900944	7.99e-07	3.24e-08	-7.94	8.51364	-0.672	CCDC24	coiled-coil domain containing 24
8154047	8.03e-07	3.26e-08	-7.93	8.50804	-0.935	DMRT2	doublesex and mab-3 related transcription factor 2
7961151	8.03e-07	3.26e-08	7.93	8.50746	2.08	KLRK1///KLRC4	killer cell lectin like receptor K1///killer cell lectin like receptor C4
8071783	8.07e-07	3.28e-08	-7.93	8.50172	-1.07	SLC2A11	solute carrier family 2 member 11
8032650	8.11e-07	3.3e-08	7.93	8.4956	0.589	PIP5K1C	phosphatidylinositol-4-phosphate 5-kinase type 1 gamma
8155192	8.18e-07	3.33e-08	7.92	8.48591	1.83	GLIPR2	GLI pathogenesis related 2
8081219	8.18e-07	3.33e-08	-7.92	8.48525	-1.44	ST3GAL6	ST3 beta-galactoside alpha-2,3-sialyltransferase 6
7996264	8.2e-07	3.34e-08	7.92	8.48254	2.19	CDH5	cadherin 5
8096425	8.23e-07	3.36e-08	-7.92	8.47749	-1.6	CCSER1	coiled-coil serine rich protein 1
8065485	8.23e-07	3.36e-08	-7.92	8.47722	-0.743	NINL	ninein like
7918048	8.23e-07	3.36e-08	7.92	8.47689	0.553
8059776	8.24e-07	3.37e-08	-7.92	8.47349	-1.75	KCNJ13	potassium voltage-gated channel subfamily J member 13
7905406	8.24e-07	3.37e-08	-7.92	8.47325	-1.42	CGN	cingulin
8115099	8.33e-07	3.41e-08	7.91	8.46221	1.75	PDGFRB	platelet derived growth factor receptor beta
8137670	8.44e-07	3.46e-08	7.91	8.44775	1.44	PDGFA	platelet derived growth factor subunit A
7918869	8.44e-07	3.46e-08	7.91	8.44721	0.592	NGF	nerve growth factor
8085665	8.53e-07	3.5e-08	7.9	8.4352	1.22	RFTN1///RFTN1	raftlin, lipid raft linker 1///raftlin, lipid raft linker 1
8070173	8.6e-07	3.53e-08	-7.9	8.42655	-0.651	KCNE1	potassium voltage-gated channel subfamily E regulatory subunit 1
8004508	8.62e-07	3.54e-08	7.9	8.42323	2.06	SNORA67	small nucleolar RNA, H/ACA box 67
8146794	8.72e-07	3.59e-08	7.89	8.41061	2.29	PREX2	phosphatidylinositol-3,4,5-trisphosphate dependent Rac exchange factor 2
8048257	8.87e-07	3.65e-08	-7.88	8.39289	-0.959	PNKD	paroxysmal nonkinesigenic dyskinesia
7975932	9.02e-07	3.72e-08	-7.88	8.375	-0.723	TMEM63C	transmembrane protein 63C
8088664	9.04e-07	3.73e-08	-7.87	8.37184	-1.93	SUCLG2	succinate-CoA ligase GDP-forming beta subunit
8034043	9.07e-07	3.74e-08	7.87	8.36769	0.504	S1PR5	sphingosine-1-phosphate receptor 5
7917576	9.17e-07	3.79e-08	7.87	8.35575	1.55	GBP5	guanylate binding protein 5
7985285	9.2e-07	3.8e-08	-7.87	8.35137	-1.13	ARNT2	aryl hydrocarbon receptor nuclear translocator 2
8073296	9.25e-07	3.83e-08	7.86	8.34533	0.804	MCHR1	melanin concentrating hormone receptor 1
8000716	9.26e-07	3.83e-08	7.86	8.34408	1.19	SEZ6L2	seizure related 6 homolog like 2
8044333	9.28e-07	3.84e-08	7.86	8.34046	0.802	LIMS4///LIMS3-LOC440895///LIMS3	LIM zinc finger domain containing 4///LIMS3-LOC440895 readthrough///LIM zinc finger domain containing 3
8054519	9.28e-07	3.84e-08	7.86	8.34046	0.802	LIMS4///LIMS3-LOC440895///LIMS3	LIM zinc finger domain containing 4///LIMS3-LOC440895 readthrough///LIM zinc finger domain containing 3
8171229	9.35e-07	3.88e-08	-7.86	8.33141	-1.59	PNPLA4	patatin like phospholipase domain containing 4
8054004	9.35e-07	3.88e-08	7.86	8.33083	1.21	SEMA4C	semaphorin 4C
7902043	9.49e-07	3.94e-08	-7.85	8.31477	-1.41	LOC645195///DNAJC6	uncharacterized LOC645195///DnaJ heat shock protein family (Hsp40) member C6
8085300	9.52e-07	3.96e-08	-7.85	8.31102	-0.689	SEC13	SEC13 homolog, nuclear pore and COPII coat complex component
7974902	9.59e-07	3.99e-08	7.84	8.3035	2.81	RHOJ	ras homolog family member J
8088065	9.6e-07	3.99e-08	-7.84	8.30153	-1.2	SFMBT1	Scm-like with four mbt domains 1
8050071	9.6e-07	4e-08	-7.84	8.30058	-2.09	ADI1	acireductone dioxygenase 1
8022646	9.62e-07	4.01e-08	-7.84	8.29785	-1.24	KCTD1	potassium channel tetramerization domain containing 1
8132055	9.62e-07	4.01e-08	-7.84	8.29662	-1.64	MTURN	maturin, neural progenitor differentiation regulator homolog (Xenopus)
8099633	9.65e-07	4.03e-08	-7.84	8.29291	-2.06	PPARGC1A	PPARG coactivator 1 alpha
7960559	9.65e-07	4.03e-08	7.84	8.29189	0.682	IFFO1	intermediate filament family orphan 1
7923233	9.67e-07	4.04e-08	7.84	8.28962	0.558	KIF21B	kinesin family member 21B
7938100	9.76e-07	4.08e-08	-7.83	8.27887	-1.26	SMPD1	sphingomyelin phosphodiesterase 1
8091511	9.87e-07	4.13e-08	7.83	8.26691	1.32	P2RY14	purinergic receptor P2Y14
7921752	9.91e-07	4.15e-08	7.83	8.2625	1.09	ARHGAP30	Rho GTPase activating protein 30
8035896	9.94e-07	4.17e-08	7.83	8.2588	0.98	TSHZ3	teashirt zinc finger homeobox 3
7896342	9.94e-07	4.17e-08	7.82	8.25816	0.89
8164200	9.98e-07	4.19e-08	7.82	8.2527	2.51	ANGPTL2	angiopoietin like 2
7937208	1e-06	4.22e-08	-7.82	8.24636	-2.13	FUOM	fucose mutarotase
7902553	1.01e-06	4.24e-08	7.82	8.24108	1.99	IFI44	interferon induced protein 44
8063410	1.02e-06	4.28e-08	-7.81	8.23157	-0.873	PARD6B	par-6 family cell polarity regulator beta
7929511	1.03e-06	4.32e-08	7.81	8.22133	2.73	ENTPD1	ectonucleoside triphosphate diphosphohydrolase 1
7913206	1.04e-06	4.38e-08	-7.8	8.20899	-2.61	RNF186	ring finger protein 186
8072687	1.04e-06	4.4e-08	7.8	8.20382	1.08	MCM5	minichromosome maintenance complex component 5
8038069	1.06e-06	4.46e-08	-7.8	8.18997	-0.571	TMEM143	transmembrane protein 143
8125149	1.06e-06	4.48e-08	-7.79	8.1845	-2.48	SLC44A4///NEU1	solute carrier family 44 member 4///neuraminidase 1 (lysosomal sialidase)
8178653	1.06e-06	4.48e-08	-7.79	8.1845	-2.48	SLC44A4///NEU1	solute carrier family 44 member 4///neuraminidase 1 (lysosomal sialidase)
8179861	1.06e-06	4.48e-08	-7.79	8.1845	-2.48	SLC44A4///NEU1	solute carrier family 44 member 4///neuraminidase 1 (lysosomal sialidase)
8109528	1.06e-06	4.5e-08	-7.79	8.18106	-2.21	CYFIP2	cytoplasmic FMR1 interacting protein 2
7902282	1.06e-06	4.51e-08	-7.79	8.17887	-0.815	HHLA3	HERV-H LTR-associating 3
7978970	1.06e-06	4.51e-08	-7.79	8.17775	-1.15	CDKL1	cyclin dependent kinase like 1
7933561	1.07e-06	4.56e-08	-7.79	8.16783	-1.26	PARG	poly(ADP-ribose) glycohydrolase
8043367	1.07e-06	4.56e-08	-7.79	8.16746	-2.03	PLGLA///PLGLB1///PLGLB2///PLG	plasminogen-like A (pseudogene)///plasminogen-like B1///plasminogen-like B2///plasminogen
8053602	1.07e-06	4.56e-08	-7.79	8.16746	-2.03	PLGLA///PLGLB1///PLGLB2///PLG	plasminogen-like A (pseudogene)///plasminogen-like B1///plasminogen-like B2///plasminogen
7971813	1.08e-06	4.58e-08	7.78	8.16204	0.972	THSD1	thrombospondin type 1 domain containing 1
8173647	1.09e-06	4.63e-08	-7.78	8.15177	-1.4	ZDHHC15	zinc finger DHHC-type containing 15
7929012	1.09e-06	4.64e-08	7.78	8.14831	1.47	STAMBPL1	STAM binding protein like 1
8158250	1.1e-06	4.67e-08	7.77	8.14306	0.899	CERCAM	cerebral endothelial cell adhesion molecule
7939131	1.1e-06	4.68e-08	-7.77	8.13981	-1.07	WT1-AS	WT1 antisense RNA
7957850	1.11e-06	4.73e-08	7.77	8.12913	2.49	GAS2L3	growth arrest specific 2 like 3
7964119	1.11e-06	4.74e-08	7.77	8.12676	0.874	STAT2	signal transducer and activator of transcription 2
7989968	1.12e-06	4.78e-08	-7.76	8.11885	-1.13	CALML4	calmodulin like 4
7944302	1.12e-06	4.81e-08	7.76	8.11325	0.902	PHLDB1	pleckstrin homology like domain family B member 1
8082100	1.13e-06	4.83e-08	7.76	8.10841	1.17	PARP14	poly(ADP-ribose) polymerase family member 14
8068375	1.13e-06	4.84e-08	-7.76	8.10577	-0.554	SMIM11A	small integral membrane protein 11A
7915500	1.13e-06	4.84e-08	-7.76	8.10574	-2.56	C1orf210	chromosome 1 open reading frame 210
7907079	1.13e-06	4.85e-08	7.76	8.10523	1.32	RCSD1	RCSD domain containing 1
8137680	1.13e-06	4.85e-08	-7.76	8.10511	-1.12	ADAP1	ArfGAP with dual PH domains 1
7904084	1.13e-06	4.85e-08	-7.76	8.10359	-0.762	AKR7A2P1	aldo-keto reductase family 7 member A2 pseudogene 1
8063590	1.13e-06	4.86e-08	-7.76	8.10296	-3.86	PCK1	phosphoenolpyruvate carboxykinase 1
8091411	1.14e-06	4.89e-08	7.75	8.09519	1.39	TM4SF1	transmembrane 4 L six family member 1
7895374	1.14e-06	4.9e-08	7.75	8.09408	0.635
8066513	1.15e-06	4.95e-08	-7.75	8.08393	-1.27	SDC4	syndecan 4
8117207	1.16e-06	5.01e-08	-7.74	8.07132	-1.9	ALDH5A1	aldehyde dehydrogenase 5 family member A1
7962000	1.16e-06	5.02e-08	7.74	8.06916	0.85	PTHLH	parathyroid hormone like hormone
7985268	1.17e-06	5.04e-08	-7.74	8.06543	-1.92	FAH	fumarylacetoacetate hydrolase
8126153	1.17e-06	5.05e-08	-7.74	8.0626	-2.56	KCNK5	potassium two pore domain channel subfamily K member 5
8087419	1.18e-06	5.11e-08	-7.73	8.05042	-1.72	NICN1///AMT	nicolin 1///aminomethyltransferase
7950391	1.2e-06	5.21e-08	7.73	8.03215	1.68	PGM2L1	phosphoglucomutase 2 like 1
7984524	1.21e-06	5.23e-08	-7.72	8.02753	-2.25	PAQR5	progestin and adipoQ receptor family member 5
8094372	1.22e-06	5.26e-08	-7.72	8.02183	-0.802	SOD3	superoxide dismutase 3, extracellular
7902541	1.23e-06	5.32e-08	7.72	8.01064	1.97	IFI44L	interferon induced protein 44 like
7949792	1.24e-06	5.35e-08	7.71	8.00377	1.11	PTPRCAP	protein tyrosine phosphatase, receptor type C associated protein
8165843	1.25e-06	5.42e-08	-7.71	7.9912	-2.33	ARSF	arylsulfatase F
8005809	1.25e-06	5.43e-08	7.71	7.98859	1.58	LGALS9	galectin 9
8009243	1.25e-06	5.45e-08	7.71	7.98624	1.16	MILR1	mast cell immunoglobulin like receptor 1
8024070	1.26e-06	5.47e-08	7.71	7.9816	0.753	KISS1R	KISS1 receptor
8093425	1.26e-06	5.49e-08	7.7	7.97746	0.698	IDUA	iduronidase, alpha-L-
8056518	1.26e-06	5.51e-08	-7.7	7.97531	-1.22	SCN7A	sodium voltage-gated channel alpha subunit 7
8141342	1.26e-06	5.51e-08	-7.7	7.97478	-2.03	CYP3A7	cytochrome P450 family 3 subfamily A member 7
8180377	1.27e-06	5.55e-08	7.7	7.96759	0.993	MXRA7	matrix remodeling associated 7
8024572	1.28e-06	5.6e-08	7.69	7.95732	1.47	GNA15	G protein subunit alpha 15
8151042	1.28e-06	5.61e-08	-7.69	7.95682	-1.46	TTPA	alpha tocopherol transfer protein
7929282	1.31e-06	5.71e-08	7.69	7.93899	1.19	HHEX	hematopoietically expressed homeobox
8070097	1.31e-06	5.72e-08	-7.69	7.93688	-1.75	DNAJC28	DnaJ heat shock protein family (Hsp40) member C28
8110685	1.32e-06	5.76e-08	-7.68	7.92852	-1.89	PP7080///EXOC3///PP7080	uncharacterized LOC25845///exocyst complex component 3///uncharacterized LOC25845
8078784	1.34e-06	5.85e-08	-7.68	7.91436	-2.25	XYLB	xylulokinase
8053449	1.34e-06	5.85e-08	-7.68	7.91378	-1.24	TMEM150A	transmembrane protein 150A
8104298	1.34e-06	5.87e-08	-7.67	7.91063	-0.959	NDUFS6	NADH:ubiquinone oxidoreductase subunit S6
7999591	1.34e-06	5.88e-08	-7.67	7.90755	-1.28	ABCC6P2///ABCC6P1///ABCC6	ATP binding cassette subfamily C member 6 pseudogene 2///ATP binding cassette subfamily C member 6 pseudogene 1///ATP binding cassette subfamily C member 6
7904254	1.36e-06	5.96e-08	-7.67	7.89484	-1.71	ATP1A1	ATPase Na+/K+ transporting subunit alpha 1
7920422	1.36e-06	5.98e-08	7.67	7.89098	0.683	RAB13	RAB13, member RAS oncogene family
8079950	1.37e-06	6e-08	7.66	7.88711	0.934	GNAI2	G protein subunit alpha i2
7906486	1.37e-06	6.01e-08	7.66	7.88606	1.6	C1orf204///SLAMF8	chromosome 1 open reading frame 204///SLAM family member 8
8116921	1.38e-06	6.08e-08	7.66	7.87424	2.24	EDN1	endothelin 1
7924150	1.38e-06	6.09e-08	-7.66	7.8728	-1.23	TMEM206	transmembrane protein 206
7922152	1.39e-06	6.11e-08	-7.66	7.869	-1.04	CCDC181	coiled-coil domain containing 181
7935180	1.4e-06	6.17e-08	7.65	7.86002	1.77	PDLIM1	PDZ and LIM domain 1
8007483	1.4e-06	6.19e-08	-7.65	7.85608	-1.75	TMEM106A	transmembrane protein 106A
8123232	1.43e-06	6.3e-08	-7.64	7.83791	-0.932	SLC22A1	solute carrier family 22 member 1
8008646	1.43e-06	6.31e-08	-7.64	7.83603	-1.43	SCPEP1	serine carboxypeptidase 1
7980080	1.44e-06	6.36e-08	-7.64	7.82933	-2.62	ENTPD5	ectonucleoside triphosphate diphosphohydrolase 5
8099259	1.44e-06	6.36e-08	7.64	7.82916	1.3	AFAP1	actin filament associated protein 1
7898902	1.44e-06	6.36e-08	-7.64	7.82805	-0.682	LYPLA2	lysophospholipase II
7975889	1.44e-06	6.39e-08	7.64	7.82336	1.83	VASH1	vasohibin 1
8104930	1.45e-06	6.42e-08	7.64	7.81976	1.87	SLC1A3	solute carrier family 1 member 3
7994826	1.45e-06	6.43e-08	7.63	7.81774	1.84	ITGAL	integrin subunit alpha L
7968062	1.45e-06	6.46e-08	-7.63	7.81317	-2.53	ATP12A	ATPase H+/K+ transporting non-gastric alpha2 subunit
8028104	1.46e-06	6.48e-08	7.63	7.81022	0.844	HCST	hematopoietic cell signal transducer
8055478	1.46e-06	6.48e-08	-7.63	7.80906	-1.44	NXPH2	neurexophilin 2
8039196	1.46e-06	6.51e-08	7.63	7.80479	1.2	LILRA6///LILRB3	leukocyte immunoglobulin like receptor A6///leukocyte immunoglobulin like receptor B3
8092230	1.47e-06	6.55e-08	7.63	7.79848	0.901	ZMAT3	zinc finger matrin-type 3
8174051	1.48e-06	6.59e-08	7.62	7.79322	1.31	BTK	Bruton tyrosine kinase
8084951	1.49e-06	6.63e-08	7.62	7.78632	1.03	NRROS	negative regulator of reactive oxygen species
8127130	1.49e-06	6.63e-08	-7.62	7.7856	-1.93	GCM1	glial cells missing homolog 1
7932498	1.49e-06	6.64e-08	-7.62	7.78536	-0.64	SKIDA1///LOC219688	SKI/DACH domain containing 1///uncharacterized LOC219688
8157524	1.49e-06	6.66e-08	7.62	7.78172	1.22	TLR4	toll like receptor 4
8031196	1.49e-06	6.67e-08	7.62	7.78087	0.497	LAIR2	leukocyte associated immunoglobulin like receptor 2
7957351	1.5e-06	6.7e-08	-7.62	7.77541	-2.12	OTOGL	otogelin like
7896646	1.5e-06	6.73e-08	7.61	7.77146	0.631
8149877	1.53e-06	6.84e-08	7.61	7.75474	1.3	PNMA2	paraneoplastic Ma antigen 2
8013989	1.53e-06	6.86e-08	-7.61	7.75227	-0.716	SLC6A4	solute carrier family 6 member 4
7928752	1.54e-06	6.91e-08	-7.6	7.74496	-1.26	GHITM	growth hormone inducible transmembrane protein
8154135	1.55e-06	6.96e-08	-7.6	7.73759	-2.12	SLC1A1	solute carrier family 1 member 1
7908376	1.55e-06	6.96e-08	7.6	7.73622	1.28	RGS18	regulator of G-protein signaling 18
8098576	1.55e-06	6.98e-08	-7.6	7.73338	-1.68	SLC25A4	solute carrier family 25 member 4
8046461	1.56e-06	7e-08	7.6	7.7315	1.34	ZAK	sterile alpha motif and leucine zipper containing kinase AZK
8042259	1.57e-06	7.06e-08	-7.59	7.72235	-1.21	MDH1	malate dehydrogenase 1
8026407	1.58e-06	7.12e-08	7.59	7.71345	0.987	SYDE1	synapse defective Rho GTPase homolog 1
8012823	1.59e-06	7.14e-08	-7.59	7.71059	-0.834	SCO1	SCO1 cytochrome c oxidase assembly protein
8148728	1.61e-06	7.27e-08	-7.58	7.69212	-0.79	CYC1	cytochrome c1
8180029	1.61e-06	7.28e-08	7.58	7.69129	1.47	HLA-DQB2	major histocompatibility complex, class II, DQ beta 2
7952526	1.64e-06	7.4e-08	7.57	7.67431	2.21	CDON	cell adhesion associated, oncogene regulated
8013606	1.64e-06	7.41e-08	-7.57	7.67355	-0.868	VTN	vitronectin
7937772	1.64e-06	7.43e-08	7.57	7.67071	1.36	INS-IGF2///IGF2	INS-IGF2 readthrough///insulin like growth factor 2
8067680	1.65e-06	7.45e-08	7.57	7.66841	0.724	HELZ2	helicase with zinc finger 2
8068494	1.67e-06	7.55e-08	7.56	7.65486	1.01	PSMD4	proteasome 26S subunit, non-ATPase 4
7896188	1.67e-06	7.56e-08	-7.56	7.65263	-1.58
7913727	1.67e-06	7.56e-08	-7.56	7.6524	-2.2	MYOM3	myomesin 3
7979241	1.67e-06	7.57e-08	7.56	7.65126	1.06	BMP4	bone morphogenetic protein 4
7991138	1.67e-06	7.57e-08	7.56	7.65113	1.08	NMB	neuromedin B
8026991	1.67e-06	7.59e-08	-7.56	7.64851	-1.21	PGPEP1	pyroglutamyl-peptidase I
7896088	1.68e-06	7.63e-08	7.56	7.64331	0.522
7896198	1.69e-06	7.67e-08	7.56	7.63879	0.47
7954469	1.69e-06	7.7e-08	-7.56	7.63408	-1.29	RASSF8	Ras association domain family member 8
7942453	1.71e-06	7.77e-08	-7.55	7.62525	-1.26	PLEKHB1	pleckstrin homology domain containing B1
8077851	1.72e-06	7.82e-08	7.55	7.61861	1.1	HRH1	histamine receptor H1
8085797	1.72e-06	7.87e-08	-7.55	7.61227	-1.46	THRB	thyroid hormone receptor beta
7955305	1.72e-06	7.87e-08	-7.55	7.61213	-0.502	AQP6	aquaporin 6
8027701	1.75e-06	7.99e-08	7.54	7.59698	1.32	GRAMD1A	GRAM domain containing 1A
8077635	1.75e-06	8e-08	-7.54	7.59583	-1.14	OGG1	8-oxoguanine DNA glycosylase
8143471	1.76e-06	8.05e-08	7.54	7.58865	1.73	CLEC5A	C-type lectin domain family 5 member A
8113358	1.76e-06	8.07e-08	7.54	7.58705	3.13	ST8SIA4	ST8 alpha-N-acetyl-neuraminide alpha-2,8-sialyltransferase 4
7957023	1.79e-06	8.19e-08	7.53	7.57204	2.84	LYZ	lysozyme
8009844	1.8e-06	8.23e-08	-7.53	7.56605	-1.2	LLGL2	LLGL2, scribble cell polarity complex component
7964388	1.8e-06	8.24e-08	7.53	7.56551	2.59	NDUFA4L2	NDUFA4, mitochondrial complex associated like 2
7972750	1.8e-06	8.26e-08	7.53	7.56296	2.5	COL4A1	collagen type IV alpha 1 chain
7939365	1.8e-06	8.28e-08	7.52	7.56027	1.05	FJX1	four jointed box 1
8130462	1.8e-06	8.28e-08	-7.52	7.55988	-0.518
7893558	1.81e-06	8.3e-08	-7.52	7.55808	-1.15
8072777	1.81e-06	8.31e-08	-7.52	7.55619	-1.05	MPST	mercaptopyruvate sulfurtransferase
8015016	1.81e-06	8.33e-08	-7.52	7.55451	-0.702	TNS4	tensin 4
8133110	1.82e-06	8.39e-08	7.52	7.54732	0.632
8087691	1.84e-06	8.46e-08	-7.51	7.53794	-0.931	CACNA2D2	calcium voltage-gated channel auxiliary subunit alpha2delta 2
8156274	1.84e-06	8.47e-08	-7.51	7.5368	-1.34	NXNL2	nucleoredoxin-like 2
8068620	1.84e-06	8.49e-08	-7.51	7.53445	-1.03	SH3BGR	SH3 domain binding glutamate rich protein
7997525	1.84e-06	8.49e-08	-7.51	7.53438	-0.812	MLYCD	malonyl-CoA decarboxylase
7948951	1.86e-06	8.61e-08	-7.51	7.52099	-1.44	SLC22A24	solute carrier family 22 member 24
7906085	1.87e-06	8.64e-08	7.51	7.51721	1.05	LMNA	lamin A/C
8018972	1.89e-06	8.72e-08	7.5	7.50794	0.49
8026821	1.9e-06	8.78e-08	7.5	7.5009	0.893	MAP1S	microtubule associated protein 1S
7914202	1.9e-06	8.82e-08	7.5	7.49634	1.34	SNHG12///SNORA16A///SNORA61///SNORA44///SNHG12	small nucleolar RNA host gene 12///small nucleolar RNA, H/ACA box 16A///small nucleolar RNA, H/ACA box 61///small nucleolar RNA, H/ACA box 44///small nucleolar RNA host gene 12
8149612	1.91e-06	8.85e-08	7.49	7.49221	1.03	LZTS1	leucine zipper tumor suppressor 1
7981046	1.91e-06	8.87e-08	7.49	7.49035	0.922	IFI27L2	interferon alpha inducible protein 27 like 2
7932826	1.91e-06	8.88e-08	7.49	7.48876	1.47	KIAA1462	KIAA1462
8032588	1.91e-06	8.89e-08	-7.49	7.48855	-2.66	SMIM24	small integral membrane protein 24
8173208	1.91e-06	8.89e-08	7.49	7.48833	0.766	SPIN4	spindlin family member 4
8125463	1.91e-06	8.9e-08	7.49	7.48738	1.43	HLA-DQB2	major histocompatibility complex, class II, DQ beta 2
8064031	1.91e-06	8.9e-08	7.49	7.48677	0.775	BIRC7	baculoviral IAP repeat containing 7
8068898	1.91e-06	8.91e-08	7.49	7.48553	1.61	HIST1H2BK///H2BFS///HIST1H2BE	histone cluster 1, H2bk///H2B histone family member S///histone cluster 1, H2be
7955562	1.91e-06	8.92e-08	7.49	7.48503	1.49	ACVRL1	activin A receptor like type 1
8049825	1.92e-06	8.93e-08	7.49	7.48374	0.764	HDLBP	high density lipoprotein binding protein
7911993	1.93e-06	9e-08	-7.49	7.47506	-0.936	ICMT	isoprenylcysteine carboxyl methyltransferase
8116610	1.94e-06	9.07e-08	-7.48	7.46809	-1.95	NQO2	NAD(P)H quinone dehydrogenase 2
8068200	1.95e-06	9.11e-08	-7.48	7.46357	-0.782	URB1-AS1	URB1 antisense RNA 1 (head to head)
7966135	1.95e-06	9.14e-08	7.48	7.46026	1.01	CORO1C	coronin 1C
7914950	1.95e-06	9.14e-08	7.48	7.45975	1.19	CSF3R	colony stimulating factor 3 receptor
8041048	1.95e-06	9.15e-08	7.48	7.45861	0.831	FOSL2	FOS like 2, AP-1 transcription factor subunit
8140782	1.95e-06	9.15e-08	-7.48	7.45843	-2.38	ABCB1	ATP binding cassette subfamily B member 1
8059783	1.96e-06	9.2e-08	-7.48	7.45299	-1.22	NGEF	neuronal guanine nucleotide exchange factor
8034806	1.96e-06	9.21e-08	7.48	7.4524	0.683	DDX39A	DEAD-box helicase 39A
8178826	1.96e-06	9.22e-08	7.48	7.45141	1.9	HLA-DQB1	major histocompatibility complex, class II, DQ beta 1
8180022	1.96e-06	9.22e-08	7.48	7.45141	1.9	HLA-DQB1	major histocompatibility complex, class II, DQ beta 1
8173444	1.98e-06	9.29e-08	7.47	7.44332	2.22	IL2RG	interleukin 2 receptor subunit gamma
7908003	1.98e-06	9.32e-08	-7.47	7.43988	-1.97	NPL	N-acetylneuraminate pyruvate lyase
8078147	2.01e-06	9.45e-08	-7.47	7.42622	-1.83	BTD	biotinidase
8138489	2.01e-06	9.47e-08	7.47	7.42433	1.7	CDCA7L	cell division cycle associated 7 like
7904287	2.02e-06	9.49e-08	7.46	7.42147	1.47	CD2	CD2 molecule
8106393	2.02e-06	9.5e-08	7.46	7.42043	1.81	F2R	coagulation factor II thrombin receptor
8091283	2.03e-06	9.57e-08	7.46	7.4136	1.48	PLOD2	procollagen-lysine,2-oxoglutarate 5-dioxygenase 2
8047265	2.06e-06	9.73e-08	-7.45	7.3959	-1.04	TYW5///C2orf47	tRNA-yW synthesizing protein 5///chromosome 2 open reading frame 47
8040774	2.06e-06	9.74e-08	-7.45	7.39537	-0.56	AGBL5	ATP/GTP binding protein like 5
7994131	2.07e-06	9.78e-08	7.45	7.39157	1	PRKCB	protein kinase C beta
8134257	2.08e-06	9.84e-08	7.45	7.38492	1.82	GNG11	G protein subunit gamma 11
8131143	2.09e-06	9.87e-08	7.45	7.3816	1.43	LFNG	LFNG O-fucosylpeptide 3-beta-N-acetylglucosaminyltransferase
8037775	2.1e-06	9.94e-08	7.45	7.37498	0.82	PTGIR	prostaglandin I2 (prostacyclin) receptor (IP)
8180257	2.1e-06	9.97e-08	7.44	7.37201	1.71	CEP170	centrosomal protein 170
7986503	2.13e-06	1.01e-07	7.44	7.36014	0.719	DNM1P46	dynamin 1 pseudogene 46
8030804	2.13e-06	1.01e-07	7.44	7.35833	1.26	CD33	CD33 molecule
7916853	2.14e-06	1.01e-07	-7.44	7.35518	-1.13	DIRAS3	DIRAS family GTPase 3
8017393	2.14e-06	1.02e-07	7.44	7.35334	0.617	LIMD2///MAP3K3	LIM domain containing 2///mitogen-activated protein kinase kinase kinase 3
8006531	2.17e-06	1.03e-07	7.43	7.33969	1.59	SLFN5	schlafen family member 5
8030360	2.17e-06	1.03e-07	7.43	7.33748	1.51	SNORD32A	small nucleolar RNA, C/D box 32A
7896713	2.17e-06	1.03e-07	7.43	7.33576	0.947
7905116	2.19e-06	1.04e-07	7.42	7.32746	1.43	PLEKHO1	pleckstrin homology domain containing O1
7894664	2.19e-06	1.04e-07	7.42	7.32673	1.22
8014768	2.19e-06	1.05e-07	7.42	7.32301	2.4	PLXDC1	plexin domain containing 1
8113938	2.2e-06	1.05e-07	-7.42	7.31804	-0.652	ACSL6	acyl-CoA synthetase long-chain family member 6
8057463	2.23e-06	1.06e-07	-7.42	7.30548	-1.83	CERKL///ITGA4	ceramide kinase like///integrin subunit alpha 4
8016476	2.23e-06	1.06e-07	-7.42	7.30496	-1.4	HOXB9	homeobox B9
8075322	2.23e-06	1.07e-07	-7.41	7.30273	-1.15	GATSL3	GATS protein like 3
8144931	2.24e-06	1.07e-07	-7.41	7.30043	-1.07	ATP6V1B2	ATPase H+ transporting V1 subunit B2
8156571	2.27e-06	1.09e-07	7.41	7.28298	1.62	MIR27B///C9orf3	microRNA 27b///chromosome 9 open reading frame 3
8091188	2.3e-06	1.1e-07	7.4	7.27186	0.752
7978595	2.31e-06	1.11e-07	7.4	7.26663	1.54	BAZ1A	bromodomain adjacent to zinc finger domain 1A
8016194	2.31e-06	1.11e-07	7.4	7.26321	0.747	MAP3K14-AS1///MAP3K14	MAP3K14 antisense RNA 1///mitogen-activated protein kinase kinase kinase 14
8178977	2.31e-06	1.11e-07	7.4	7.26319	1.17	TAPBP	TAP binding protein (tapasin)
8003348	2.36e-06	1.13e-07	7.39	7.2441	0.71	RNF166	ring finger protein 166
8076056	2.36e-06	1.13e-07	7.39	7.24236	1.02	LOC400927///CSNK1E	TPTE and PTEN homologous inositol lipid phosphatase pseudogene///casein kinase 1 epsilon
8143209	2.36e-06	1.14e-07	-7.39	7.23936	-0.838	SVOPL	SVOP like
8124940	2.38e-06	1.14e-07	7.38	7.23239	1.14	SNORD117	small nucleolar RNA, C/D box 117
8154211	2.39e-06	1.15e-07	7.38	7.22462	1.22
8085608	2.4e-06	1.15e-07	-7.38	7.22215	-1.66	HACL1	2-hydroxyacyl-CoA lyase 1
8071877	2.41e-06	1.16e-07	7.38	7.2157	0.456	POM121L9P	POM121 transmembrane nucleoporin like 9, pseudogene
8018189	2.42e-06	1.17e-07	7.38	7.21327	0.522	CD300E	CD300e molecule
8123606	2.45e-06	1.18e-07	7.37	7.1974	1.99	SERPINB9P1	serpin family B member 9 pseudogene 1
8060675	2.48e-06	1.2e-07	7.36	7.18644	1.06	CDC25B	cell division cycle 25B
7947199	2.48e-06	1.2e-07	-7.36	7.18599	-1.02	LGR4	leucine rich repeat containing G protein-coupled receptor 4
8175393	2.48e-06	1.2e-07	7.36	7.18401	1.4	ARHGEF6	Rac/Cdc42 guanine nucleotide exchange factor 6
8036923	2.48e-06	1.2e-07	7.36	7.18334	0.603	NUMBL	NUMB like, endocytic adaptor protein
8102371	2.5e-06	1.21e-07	7.36	7.17534	0.634	ZGRF1	zinc finger GRF-type containing 1
8089544	2.51e-06	1.21e-07	7.36	7.17224	2.25	CCDC80	coiled-coil domain containing 80
8173287	2.56e-06	1.24e-07	7.35	7.15098	2.1	VSIG4	V-set and immunoglobulin domain containing 4
8152668	2.57e-06	1.24e-07	7.35	7.14616	1.32	ATAD2	ATPase family, AAA domain containing 2
8097991	2.58e-06	1.25e-07	7.35	7.14246	2.1	TDO2	tryptophan 2,3-dioxygenase
8138353	2.59e-06	1.26e-07	7.34	7.13741	0.587	MEOX2	mesenchyme homeobox 2
8132439	2.59e-06	1.26e-07	-7.34	7.1346	-2.15	SUGCT	succinyl-CoA:glutarate-CoA transferase
8120043	2.62e-06	1.27e-07	7.34	7.12459	0.915	RUNX2	runt related transcription factor 2
8126666	2.62e-06	1.27e-07	7.34	7.12389	0.844	NFKBIE	NFKB inhibitor epsilon
8132031	2.63e-06	1.28e-07	-7.34	7.11925	-1.39	PRR15	proline rich 15
8155250	2.63e-06	1.28e-07	-7.34	7.1161	-1.79	GRHPR	glyoxylate and hydroxypyruvate reductase
7912316	2.64e-06	1.29e-07	-7.33	7.1119	-0.923	CASZ1	castor zinc finger 1
7905731	2.65e-06	1.29e-07	7.33	7.10926	1.22
8083978	2.65e-06	1.29e-07	-7.33	7.10592	-1.48	NAALADL2	N-acetylated alpha-linked acidic dipeptidase-like 2
7995976	2.66e-06	1.3e-07	7.33	7.1043	1.52	CPNE2	copine 2
8082003	2.68e-06	1.31e-07	-7.33	7.09343	-1.16	EAF2	ELL associated factor 2
7896688	2.69e-06	1.31e-07	7.33	7.09231	2.76
7920877	2.69e-06	1.31e-07	7.32	7.0917	1.26	ARHGEF2	Rho/Rac guanine nucleotide exchange factor 2
8035714	2.69e-06	1.32e-07	7.32	7.0899	0.813	GMIP	GEM interacting protein
8055624	2.7e-06	1.32e-07	7.32	7.0843	1.39	ZEB2	zinc finger E-box binding homeobox 2
7901497	2.73e-06	1.34e-07	-7.32	7.07349	-1.58	ZYG11A	zyg-11 family member A, cell cycle regulator
8086344	2.75e-06	1.35e-07	7.31	7.06452	1.61	CX3CR1	C-X3-C motif chemokine receptor 1
8066848	2.76e-06	1.36e-07	7.31	7.05928	1.5	PREX1	phosphatidylinositol-3,4,5-trisphosphate dependent Rac exchange factor 1
8101844	2.77e-06	1.36e-07	-7.31	7.05685	-0.988	ADH5///ADH5	alcohol dehydrogenase 5 (class III), chi polypeptide///alcohol dehydrogenase 5 (class III), chi polypeptide
8099324	2.8e-06	1.37e-07	-7.31	7.04638	-1.14
8040458	2.81e-06	1.38e-07	7.3	7.03954	1.03	KCNS3	potassium voltage-gated channel modifier subfamily S member 3
8126371	2.82e-06	1.38e-07	7.3	7.03821	0.856	CCND3	cyclin D3
7940341	2.84e-06	1.4e-07	-7.3	7.02979	-1.16	MS4A10	membrane spanning 4-domains A10
7990269	2.84e-06	1.4e-07	-7.3	7.0275	-0.864	C15orf59	chromosome 15 open reading frame 59
7964436	2.84e-06	1.4e-07	7.3	7.02593	0.77	ARHGAP9	Rho GTPase activating protein 9
8039607	2.85e-06	1.41e-07	-7.3	7.02292	-0.893	ZIM2///PEG3	zinc finger imprinted 2///paternally expressed 3
7913156	2.87e-06	1.41e-07	-7.29	7.01662	-1.6	AKR7A2	aldo-keto reductase family 7 member A2
8129861	2.87e-06	1.41e-07	7.29	7.01651	1.19	IFNGR1	interferon gamma receptor 1
8000184	2.87e-06	1.42e-07	7.29	7.01512	2.39	IGSF6	immunoglobulin superfamily member 6
8003903	2.87e-06	1.42e-07	7.29	7.01361	1.09	ARRB2	arrestin beta 2
7998434	2.88e-06	1.42e-07	7.29	7.01003	1.86	TPSB2///TPSAB1	tryptase beta 2 (gene/pseudogene)///tryptase alpha/beta 1
8135915	2.88e-06	1.43e-07	7.29	7.00833	3.99	HILPDA	hypoxia inducible lipid droplet associated
8153868	2.89e-06	1.43e-07	-7.29	7.00562	-0.492	LRRC24///C8orf82	leucine rich repeat containing 24///chromosome 8 open reading frame 82
8086754	2.9e-06	1.44e-07	-7.29	7.00135	-0.768	SCAP	SREBF chaperone
8105348	2.91e-06	1.44e-07	7.28	6.99582	1.85	GPX8	glutathione peroxidase 8 (putative)
7987772	2.91e-06	1.45e-07	7.28	6.99386	1.12	EHD4	EH domain containing 4
7960117	2.91e-06	1.45e-07	-7.28	6.9938	-2.3	PXMP2	peroxisomal membrane protein 2
8001477	2.96e-06	1.47e-07	-7.28	6.97899	-0.978	AMFR	autocrine motility factor receptor
8053801	2.97e-06	1.47e-07	7.28	6.97489	1.76	ANKRD36C///ANKRD36///ANKRD36B	ankyrin repeat domain 36C///ankyrin repeat domain 36///ankyrin repeat domain 36B
8032265	2.98e-06	1.48e-07	7.27	6.96977	0.687	MEX3D	mex-3 RNA binding family member D
7977409	2.98e-06	1.48e-07	7.27	6.96886	1.57	CRIP1	cysteine rich protein 1
8138776	2.99e-06	1.49e-07	-7.27	6.96585	-1.54	HIBADH	3-hydroxyisobutyrate dehydrogenase
8137404	3e-06	1.49e-07	7.27	6.96225	0.834	MIR671///CHPF2	microRNA 671///chondroitin polymerizing factor 2
8084630	3e-06	1.49e-07	-7.27	6.96057	-1.28	NMRAL1P1	NmrA like redox sensor 1 pseudogene 1
7984743	3.03e-06	1.51e-07	7.27	6.95071	1.44	CD276	CD276 molecule
8177851	3.03e-06	1.51e-07	-7.26	6.94676	-0.778	C6orf136	chromosome 6 open reading frame 136
8179167	3.03e-06	1.51e-07	-7.26	6.94676	-0.778	C6orf136	chromosome 6 open reading frame 136
7896822	3.04e-06	1.52e-07	7.26	6.9455	0.806	AGRN	agrin
7949033	3.05e-06	1.52e-07	-7.26	6.94094	-0.878	MACROD1	MACRO domain containing 1
8072817	3.08e-06	1.54e-07	7.26	6.92846	1.21	CDC42EP1	CDC42 effector protein 1
8004175	3.09e-06	1.55e-07	-7.25	6.9245	-0.913	TXNDC17///MED31///KIAA0753	thioredoxin domain containing 17///mediator complex subunit 31///KIAA0753
8085531	3.09e-06	1.55e-07	-7.25	6.92412	-1.11	MRPS25	mitochondrial ribosomal protein S25
8140737	3.1e-06	1.55e-07	7.25	6.9219	0.538
8087447	3.1e-06	1.55e-07	-7.25	6.92037	-1.89	MST1	macrophage stimulating 1
8074388	3.11e-06	1.56e-07	-7.25	6.91791	-0.81	SLC25A1	solute carrier family 25 member 1
8073826	3.14e-06	1.58e-07	-7.25	6.90613	-1.6	PPARA	peroxisome proliferator activated receptor alpha
7934570	3.16e-06	1.59e-07	7.24	6.90052	1.58	KCNMA1	potassium calcium-activated channel subfamily M alpha 1
7938035	3.16e-06	1.59e-07	7.24	6.89918	2.13	TRIM22	tripartite motif containing 22
8091523	3.17e-06	1.6e-07	7.24	6.89373	1.57	P2RY13	purinergic receptor P2Y13
7947934	3.17e-06	1.6e-07	-7.24	6.8937	-1.33	MTCH2	mitochondrial carrier 2
8079346	3.19e-06	1.6e-07	-7.24	6.88797	-1.01	SACM1L	SAC1 suppressor of actin mutations 1-like (yeast)
7972461	3.19e-06	1.61e-07	-7.24	6.88664	-1.76	SLC15A1	solute carrier family 15 member 1
8173825	3.24e-06	1.63e-07	-7.23	6.87149	-1.66	RPS6KA6	ribosomal protein S6 kinase A6
7911085	3.24e-06	1.63e-07	-7.23	6.87101	-0.83	COX20	COX20, cytochrome c oxidase assembly factor
8092520	3.24e-06	1.63e-07	7.23	6.87019	1.27	C3orf70	chromosome 3 open reading frame 70
8042696	3.24e-06	1.63e-07	-7.23	6.8696	-1.05	SPR	sepiapterin reductase (7,8-dihydrobiopterin:NADP+ oxidoreductase)
7960427	3.24e-06	1.63e-07	-7.23	6.86945	-0.998	AKAP3	A-kinase anchoring protein 3
8056257	3.24e-06	1.64e-07	7.23	6.86814	1.94	FAP	fibroblast activation protein alpha
8106418	3.24e-06	1.64e-07	-7.23	6.86739	-3.69	CRHBP	corticotropin releasing hormone binding protein
8178199	3.24e-06	1.64e-07	7.23	6.86599	1.87	HLA-DQA1	major histocompatibility complex, class II, DQ alpha 1
8179489	3.24e-06	1.64e-07	7.23	6.86599	1.87	HLA-DQA1	major histocompatibility complex, class II, DQ alpha 1
7956930	3.26e-06	1.65e-07	7.23	6.85954	0.787	DYRK2	dual specificity tyrosine phosphorylation regulated kinase 2
8163505	3.26e-06	1.65e-07	-7.23	6.85918	-1.72	HDHD3	haloacid dehalogenase like hydrolase domain containing 3
8081277	3.26e-06	1.65e-07	-7.23	6.85889	-1.19	NIT2	nitrilase family member 2
8005953	3.26e-06	1.66e-07	7.23	6.85558	1.18	SNORD4A	small nucleolar RNA, C/D box 4A
8037505	3.26e-06	1.66e-07	-7.23	6.85532	-0.773	TRAPPC6A	trafficking protein particle complex 6A
7967084	3.29e-06	1.67e-07	-7.22	6.84787	-0.801	POP5	POP5 homolog, ribonuclease P/MRP subunit
8030128	3.29e-06	1.67e-07	7.22	6.84614	1.22	PPP1R15A	protein phosphatase 1 regulatory subunit 15A
7902367	3.3e-06	1.68e-07	-7.22	6.84163	-2.05	ACADM	acyl-CoA dehydrogenase, C-4 to C-12 straight chain
8010983	3.3e-06	1.68e-07	7.22	6.84059	1.06	ABR	active BCR-related
7957665	3.32e-06	1.69e-07	7.22	6.83398	1.83	ELK3	ELK3, ETS transcription factor
7895405	3.33e-06	1.7e-07	-7.21	6.83059	-1.36
8080306	3.33e-06	1.7e-07	-7.21	6.82971	-0.879	PHF7	PHD finger protein 7
7908940	3.34e-06	1.7e-07	7.21	6.82762	1.41	ATP2B4	ATPase plasma membrane Ca2+ transporting 4
8009241	3.34e-06	1.71e-07	7.21	6.8248	0.884	SNORD104	small nucleolar RNA, C/D box 104
8130565	3.35e-06	1.71e-07	7.21	6.82365	1
8094743	3.35e-06	1.71e-07	7.21	6.82319	1.58	RHOH	ras homolog family member H
8115327	3.36e-06	1.72e-07	7.21	6.81777	1.29	SPARC	secreted protein acidic and cysteine rich
8165508	3.37e-06	1.72e-07	7.21	6.81578	1.41	NRARP	NOTCH-regulated ankyrin repeat protein
8114709	3.38e-06	1.73e-07	7.21	6.81144	0.564	FCHSD1	FCH and double SH3 domains 1
8089928	3.38e-06	1.73e-07	7.21	6.81126	0.915
8179519	3.39e-06	1.74e-07	7.21	6.80807	1.57	HLA-DPB1	major histocompatibility complex, class II, DP beta 1
7899160	3.4e-06	1.75e-07	7.2	6.80251	2.06	CD52	CD52 molecule
8038792	3.4e-06	1.75e-07	-7.2	6.80187	-1.09	ETFB	electron transfer flavoprotein beta subunit
8010562	3.43e-06	1.76e-07	-7.2	6.79419	-0.819	BAIAP2	BAI1 associated protein 2
7945944	3.43e-06	1.76e-07	7.2	6.79142	0.984	RHOG	ras homolog family member G
8156750	3.43e-06	1.77e-07	7.2	6.79113	0.812	ANP32B	acidic nuclear phosphoprotein 32 family member B
8050232	3.44e-06	1.77e-07	-7.2	6.78796	-1.15	CYS1	cystin 1
8138939	3.48e-06	1.79e-07	-7.19	6.77552	-0.522
7950005	3.5e-06	1.8e-07	-7.19	6.77027	-0.798	MRGPRF	MAS related GPR family member F
8166059	3.5e-06	1.8e-07	7.19	6.77004	1.73	TLR7	toll like receptor 7
8056408	3.51e-06	1.81e-07	-7.19	6.76445	-1.24	GALNT3	polypeptide N-acetylgalactosaminyltransferase 3
7974341	3.52e-06	1.82e-07	7.19	6.76216	1.74	GNG2	G protein subunit gamma 2
7959148	3.52e-06	1.82e-07	-7.19	6.76206	-0.399	SIRT4	sirtuin 4
7922756	3.53e-06	1.82e-07	7.18	6.7595	0.738	NMNAT2	nicotinamide nucleotide adenylyltransferase 2
8044440	3.54e-06	1.83e-07	7.18	6.75462	1.15	FBLN7	fibulin 7
7975482	3.56e-06	1.84e-07	-7.18	6.749	-0.528	RGS6	regulator of G-protein signaling 6
7900531	3.56e-06	1.84e-07	7.18	6.74826	0.577	GUCA2B	guanylate cyclase activator 2B
7908597	3.56e-06	1.84e-07	7.18	6.74716	2.15	NR5A2	nuclear receptor subfamily 5 group A member 2
8049297	3.56e-06	1.85e-07	7.18	6.74529	1.76	SCARNA5	small Cajal body-specific RNA 5
8124911	3.57e-06	1.85e-07	7.18	6.7437	0.863	HLA-C///HLA-B///HLA-B	major histocompatibility complex, class I, C///major histocompatibility complex, class I, B///major histocompatibility complex, class I, B
8163328	3.57e-06	1.85e-07	-7.18	6.74275	-2.12	PTGR1	prostaglandin reductase 1
8056860	3.58e-06	1.86e-07	7.18	6.73874	1.36	WIPF1	WAS/WASL interacting protein family member 1
8092534	3.59e-06	1.87e-07	-7.17	6.73466	-0.838	TMEM41A	transmembrane protein 41A
8126860	3.63e-06	1.89e-07	-7.17	6.72369	-1.51	MUT	methylmalonyl-CoA mutase
8031213	3.63e-06	1.89e-07	7.17	6.72216	1.22	LILRA1	leukocyte immunoglobulin like receptor A1
7996563	3.65e-06	1.9e-07	-7.17	6.71592	-3.33	HSD11B2	hydroxysteroid 11-beta dehydrogenase 2
8062971	3.66e-06	1.9e-07	7.17	6.71412	0.995	SYS1-DBNDD2///DBNDD2	SYS1-DBNDD2 readthrough (NMD candidate)///dysbindin domain containing 2
7977888	3.67e-06	1.91e-07	7.16	6.71044	0.557	CDH24	cadherin 24
8008064	3.69e-06	1.92e-07	-7.16	6.70572	-1.42	PNPO	pyridoxamine 5'-phosphate oxidase
8002941	3.71e-06	1.93e-07	7.16	6.6996	0.92	ADAMTS18	ADAM metallopeptidase with thrombospondin type 1 motif 18
7914342	3.71e-06	1.94e-07	-7.16	6.69738	-1.87	FABP3	fatty acid binding protein 3
8111932	3.71e-06	1.94e-07	7.16	6.69634	2.09	CCL28	C-C motif chemokine ligand 28
8006214	3.74e-06	1.95e-07	7.16	6.68932	1.25	ADAP2	ArfGAP with dual PH domains 2
8035517	3.74e-06	1.96e-07	7.15	6.68747	0.856	COMP	cartilage oligomeric matrix protein
8098439	3.74e-06	1.96e-07	-7.15	6.68716	-2.99	EPCAM	epithelial cell adhesion molecule
7952116	3.74e-06	1.96e-07	7.15	6.68641	0.889	BCL9L	B-cell CLL/lymphoma 9-like
8001394	3.74e-06	1.96e-07	-7.15	6.68475	-2.2	TOX3	TOX high mobility group box family member 3
8035095	3.75e-06	1.96e-07	-7.15	6.6824	-2.16	CYP4F11	cytochrome P450 family 4 subfamily F member 11
7969330	3.76e-06	1.97e-07	7.15	6.67876	2.43	PCDH17	protocadherin 17
7960744	3.77e-06	1.98e-07	7.15	6.67509	1.67	C1R	complement C1r subcomponent
8128472	3.81e-06	2e-07	7.15	6.66505	0.98	ASCC3	activating signal cointegrator 1 complex subunit 3
8076690	3.81e-06	2e-07	7.14	6.66429	0.878	KIAA0930	KIAA0930
8067802	3.81e-06	2e-07	7.14	6.66341	0.872	RGS19	regulator of G-protein signaling 19
8001830	3.81e-06	2e-07	-7.14	6.66316	-1.74	CMTM4	CKLF like MARVEL transmembrane domain containing 4
8029580	3.81e-06	2.01e-07	7.14	6.66139	0.918	RELB	RELB proto-oncogene, NF-kB subunit
7935572	3.82e-06	2.01e-07	-7.14	6.65916	-0.903	MIR1287///PYROXD2	microRNA 1287///pyridine nucleotide-disulphide oxidoreductase domain 2
8011200	3.82e-06	2.01e-07	7.14	6.65787	0.412	SMYD4	SET and MYND domain containing 4
8047300	3.86e-06	2.03e-07	-7.14	6.64684	-3.3	AOX1	aldehyde oxidase 1
7957861	3.86e-06	2.04e-07	7.14	6.64674	1.42	ANO4	anoctamin 4
8155083	3.87e-06	2.04e-07	7.14	6.64311	2.94	CA9	carbonic anhydrase 9
7982050	3.88e-06	2.05e-07	-7.13	6.64015	-2.2	SNORD115-44///SNORD115-43///SNORD115-41///SNORD115-39///SNORD115-38///SNORD115-36///SNORD115-34///SNORD115-31///SNORD115-29///SNORD115-26///SNORD115-22///SNORD115-16///SNORD115-11///SNORD115-7///SNORD115-6	small nucleolar RNA, C/D box 115-44///small nucleolar RNA, C/D box 115-43///small nucleolar RNA, C/D box 115-41///small nucleolar RNA, C/D box 115-39///small nucleolar RNA, C/D box 115-38///small nucleolar RNA, C/D box 115-36///small nucleolar RNA, C/D box 115-34///small nucleolar RNA, C/D box 115-31///small nucleolar RNA, C/D box 115-29///small nucleolar RNA, C/D box 115-26///small nucleolar RNA…
7949444	3.89e-06	2.05e-07	7.13	6.63805	0.33	KCNK7	potassium two pore domain channel subfamily K member 7
8002133	3.89e-06	2.05e-07	7.13	6.63735	0.912	PSMB10	proteasome subunit beta 10
7960794	3.9e-06	2.06e-07	7.13	6.63406	2.14	CD163	CD163 molecule
8093126	3.91e-06	2.07e-07	7.13	6.631	0.769
8136727	3.93e-06	2.08e-07	7.13	6.62428	0.568	TRBC1	T cell receptor beta constant 1
8174654	4.06e-06	2.15e-07	-7.11	6.59031	-1.48	KLHL13	kelch like family member 13
8174271	4.08e-06	2.16e-07	7.11	6.58512	0.437	RAB9B	RAB9B, member RAS oncogene family
8117219	4.15e-06	2.2e-07	-7.1	6.56886	-1.45	ACOT13	acyl-CoA thioesterase 13
8083447	4.17e-06	2.21e-07	7.1	6.56205	1.31	P2RY1	purinergic receptor P2Y1
8077786	4.17e-06	2.21e-07	7.1	6.56199	0.626	IRAK2	interleukin 1 receptor associated kinase 2
8171136	4.17e-06	2.21e-07	7.1	6.56104	1.47	P2RY8///CRLF2	purinergic receptor P2Y8///cytokine receptor-like factor 2
8177026	4.17e-06	2.21e-07	7.1	6.56104	1.47	P2RY8///CRLF2	purinergic receptor P2Y8///cytokine receptor-like factor 2
8116983	4.18e-06	2.22e-07	-7.1	6.5583	-1.2	CD83	CD83 molecule
8047187	4.19e-06	2.23e-07	-7.1	6.55556	-0.636	CCDC150	coiled-coil domain containing 150
7948493	4.23e-06	2.25e-07	7.09	6.54381	1.1	TMEM132A///SLC15A3	transmembrane protein 132A///solute carrier family 15 member 3
8052269	4.24e-06	2.26e-07	7.09	6.5406	1.43	CCDC88A	coiled-coil domain containing 88A
8006183	4.25e-06	2.27e-07	7.09	6.53796	0.78	SUZ12P1	SUZ12 polycomb repressive complex 2 subunit pseudogene 1
8071069	4.28e-06	2.28e-07	7.09	6.53014	0.994	IL17RA	interleukin 17 receptor A
8111474	4.29e-06	2.29e-07	-7.09	6.52787	-3.37	AGXT2	alanine--glyoxylate aminotransferase 2
8155864	4.29e-06	2.29e-07	-7.09	6.52766	-1.12	RORB	RAR related orphan receptor B
7978846	4.3e-06	2.3e-07	7.09	6.5245	0.832	POLE2	DNA polymerase epsilon 2, accessory subunit
8072931	4.3e-06	2.3e-07	-7.09	6.52431	-0.789	GCAT	glycine C-acetyltransferase
8021653	4.3e-06	2.3e-07	7.09	6.52277	1.23	SERPINB8	serpin family B member 8
7905881	4.33e-06	2.32e-07	7.08	6.51486	1.36	ADAM15	ADAM metallopeptidase domain 15
8058708	4.34e-06	2.32e-07	7.08	6.51331	1.36	ABCA12	ATP binding cassette subfamily A member 12
8062571	4.35e-06	2.33e-07	-7.08	6.51076	-0.9	FAM83D	family with sequence similarity 83 member D
7996516	4.37e-06	2.34e-07	7.08	6.50437	0.549	PLEKHG4	pleckstrin homology and RhoGEF domain containing G4
7942527	4.38e-06	2.35e-07	-7.08	6.5004	-1.36	POLD3	DNA polymerase delta 3, accessory subunit
8016532	4.39e-06	2.36e-07	7.08	6.49814	0.463	GNGT2	G protein subunit gamma transducin 2
7895450	4.4e-06	2.37e-07	7.07	6.49416	0.588
8180196	4.4e-06	2.37e-07	7.07	6.49409	0.957	LILRA6	leukocyte immunoglobulin like receptor A6
8124337	4.42e-06	2.37e-07	-7.07	6.49096	-4.22	SLC17A1	solute carrier family 17 member 1
7959251	4.43e-06	2.38e-07	7.07	6.48627	1.35	P2RX7	purinergic receptor P2X 7
7954631	4.44e-06	2.39e-07	7.07	6.48332	1.52	FAR2	fatty acyl-CoA reductase 2
8040843	4.45e-06	2.4e-07	7.07	6.48052	0.465	CAD	carbamoyl-phosphate synthetase 2, aspartate transcarbamylase, and dihydroorotase
8156523	4.46e-06	2.4e-07	7.07	6.47784	0.424	MIRLET7D	microRNA let-7d
8152988	4.46e-06	2.4e-07	7.07	6.47776	1.72	SLA	Src-like-adaptor
7998637	4.47e-06	2.41e-07	-7.07	6.47592	-1.42	MSRB1	methionine sulfoxide reductase B1
8114733	4.48e-06	2.42e-07	7.06	6.47193	1.65	ARAP3	ArfGAP with RhoGAP domain, ankyrin repeat and PH domain 3
8118594	4.5e-06	2.43e-07	7.06	6.46678	1.49	HLA-DPB1	major histocompatibility complex, class II, DP beta 1
7977397	4.54e-06	2.45e-07	7.06	6.45793	1.41	CRIP2	cysteine rich protein 2
8053009	4.54e-06	2.45e-07	7.06	6.45778	0.444	FBXO41	F-box protein 41
8075897	4.56e-06	2.46e-07	7.06	6.4523	0.785	C1QTNF6	C1q and tumor necrosis factor related protein 6
8124942	4.57e-06	2.47e-07	-7.05	6.44918	-0.633	ATP6V1G2-DDX39B///ATP6V1G2	ATP6V1G2-DDX39B readthrough (NMD candidate)///ATPase H+ transporting V1 subunit G2
8179762	4.57e-06	2.47e-07	-7.05	6.44918	-0.633	ATP6V1G2-DDX39B///ATP6V1G2	ATP6V1G2-DDX39B readthrough (NMD candidate)///ATPase H+ transporting V1 subunit G2
8099368	4.63e-06	2.51e-07	-7.05	6.43467	-1.64	CLNK	cytokine dependent hematopoietic cell linker
7940441	4.65e-06	2.52e-07	-7.05	6.43024	-0.443	PGA4///PGA3///PGA5	pepsinogen 4, group I (pepsinogen A)///pepsinogen 3, group I (pepsinogen A)///pepsinogen 5, group I (pepsinogen A)
8178498	4.67e-06	2.53e-07	7.04	6.42409	0.862	HLA-C///HLA-B///HLA-B	major histocompatibility complex, class I, C///major histocompatibility complex, class I, B///major histocompatibility complex, class I, B
8169898	4.7e-06	2.55e-07	7.04	6.41783	0.512	RAB33A	RAB33A, member RAS oncogene family
8120860	4.73e-06	2.56e-07	-7.04	6.41182	-1.72	BCKDHB	branched chain keto acid dehydrogenase E1 subunit beta
8158998	4.79e-06	2.6e-07	7.03	6.39785	1.01	SNORD36A///SNORD36C///RPL7A	small nucleolar RNA, C/D box 36A///small nucleolar RNA, C/D box 36C///ribosomal protein L7a
8024420	4.79e-06	2.6e-07	7.03	6.39672	0.865	SF3A2	splicing factor 3a subunit 2
7932177	4.81e-06	2.62e-07	-7.03	6.39205	-0.868	CDNF	cerebral dopamine neurotrophic factor
7975203	4.82e-06	2.62e-07	-7.03	6.38875	-1.57	MPP5	membrane palmitoylated protein 5
8008096	4.87e-06	2.65e-07	-7.02	6.37711	-0.363	SNX11	sorting nexin 11
8108981	4.87e-06	2.65e-07	-7.02	6.37702	-1.22	STK32A	serine/threonine kinase 32A
8080804	4.9e-06	2.67e-07	-7.02	6.37061	-0.545	KCTD6	potassium channel tetramerization domain containing 6
7999916	4.91e-06	2.68e-07	7.02	6.36899	0.516	GPR139	G protein-coupled receptor 139
8148902	4.95e-06	2.7e-07	-7.02	6.3598	-1.41	GPT	glutamic--pyruvic transaminase
7897632	4.96e-06	2.71e-07	-7.02	6.35697	-0.839	APITD1-CORT///APITD1///CORT	APITD1-CORT readthrough///apoptosis-inducing, TAF9-like domain 1///cortistatin
8035886	4.96e-06	2.71e-07	-7.02	6.35522	-0.564	C19orf12	chromosome 19 open reading frame 12
7892665	4.96e-06	2.71e-07	7.02	6.35517	1.04
7946365	4.97e-06	2.72e-07	-7.01	6.3526	-1.4	STK33	serine/threonine kinase 33
8129379	4.98e-06	2.72e-07	-7.01	6.35084	-1.54	ECHDC1	ethylmalonyl-CoA decarboxylase 1
8048749	5.01e-06	2.74e-07	7.01	6.34526	1.88	KCNE4	potassium voltage-gated channel subfamily E regulatory subunit 4
8078386	5.04e-06	2.76e-07	-7.01	6.33678	-2.03	GPD1L	glycerol-3-phosphate dehydrogenase 1-like
8167893	5.05e-06	2.77e-07	7.01	6.33544	0.595
8062293	5.07e-06	2.78e-07	7.01	6.3302	0.724	DLGAP4	DLG associated protein 4
8171248	5.1e-06	2.8e-07	7	6.32365	1.6	ANOS1	anosmin 1
8139057	5.11e-06	2.81e-07	7	6.32085	2.4	ELMO1	engulfment and cell motility 1
8118734	5.12e-06	2.81e-07	7	6.31843	1.45	ITPR3	inositol 1,4,5-trisphosphate receptor type 3
8161433	5.13e-06	2.82e-07	7	6.3154	0.691
8144253	5.2e-06	2.86e-07	-6.99	6.30279	-0.724	DLGAP2	DLG associated protein 2
8171896	5.2e-06	2.86e-07	6.99	6.30159	1.06	CXorf21	chromosome X open reading frame 21
8168691	5.24e-06	2.88e-07	6.99	6.2931	1.56	DIAPH2	diaphanous related formin 2
7948455	5.26e-06	2.89e-07	6.99	6.28933	1.95	MS4A6A	membrane spanning 4-domains A6A
7959078	5.28e-06	2.91e-07	6.99	6.28473	0.86
7907611	5.28e-06	2.91e-07	6.99	6.28311	1.11	RASAL2	RAS protein activator like 2
8154656	5.29e-06	2.92e-07	-6.98	6.28104	-0.439	DMRTA1	DMRT like family A1
8079311	5.29e-06	2.92e-07	-6.98	6.28033	-1.26	LARS2	leucyl-tRNA synthetase 2, mitochondrial
8137986	5.31e-06	2.93e-07	6.98	6.27669	0.521	RNF216	ring finger protein 216
7965681	5.31e-06	2.93e-07	6.98	6.27654	1.5	IKBIP	IKBKB interacting protein
7934185	5.31e-06	2.93e-07	6.98	6.2755	0.928	C10orf54	chromosome 10 open reading frame 54
8042079	5.31e-06	2.94e-07	6.98	6.27437	0.667	CCDC85A	coiled-coil domain containing 85A
7896065	5.35e-06	2.96e-07	6.98	6.26747	0.923
7951345	5.38e-06	2.98e-07	-6.98	6.26083	-0.964
7989199	5.41e-06	2.99e-07	-6.97	6.2547	-1.3	ALDH1A2	aldehyde dehydrogenase 1 family member A2
8074978	5.42e-06	3e-07	-6.97	6.25257	-0.401
8043236	5.43e-06	3.01e-07	6.97	6.24908	1.5	GNLY	granulysin
8077103	5.43e-06	3.01e-07	6.97	6.24829	1.35	ODF3B///SCO2///TYMP	outer dense fiber of sperm tails 3B///SCO2 cytochrome c oxidase assembly protein///thymidine phosphorylase
8018814	5.44e-06	3.02e-07	6.97	6.24607	0.612
7991860	5.49e-06	3.05e-07	-6.97	6.23615	-1	RAB11FIP3	RAB11 family interacting protein 3
8054166	5.51e-06	3.06e-07	-6.96	6.2329	-1.14	TSGA10	testis specific 10
8029056	5.51e-06	3.06e-07	6.96	6.23119	2.22	TMEM91	transmembrane protein 91
8094340	5.52e-06	3.07e-07	-6.96	6.22904	-0.55	MIR218-1	microRNA 218-1
8025382	5.54e-06	3.08e-07	-6.96	6.22489	-0.881	CERS4	ceramide synthase 4
8173059	5.54e-06	3.08e-07	-6.96	6.22463	-1.18	WNK3	WNK lysine deficient protein kinase 3
8077688	5.56e-06	3.1e-07	-6.96	6.22024	-0.66	IL17RC	interleukin 17 receptor C
7922410	5.57e-06	3.11e-07	6.96	6.21713	1.65	SNORD44	small nucleolar RNA, C/D box 44
8112053	5.58e-06	3.11e-07	-6.96	6.21523	-0.663	CDC20B	cell division cycle 20B
8059345	5.58e-06	3.11e-07	6.96	6.21521	0.555	SCG2	secretogranin II
7922773	5.61e-06	3.13e-07	6.96	6.20917	1.94	NCF2	neutrophil cytosolic factor 2
7968911	5.65e-06	3.16e-07	6.95	6.2015	0.558
7901102	5.65e-06	3.16e-07	-6.95	6.20119	-0.934	MMACHC	methylmalonic aciduria (cobalamin deficiency) cblC type, with homocystinuria
8071516	5.65e-06	3.16e-07	-6.95	6.20042	-0.53	BCR	BCR, RhoGEF and GTPase activating protein
8112807	5.72e-06	3.2e-07	-6.95	6.18729	-1.09	ARSB	arylsulfatase B
8090866	5.77e-06	3.23e-07	-6.94	6.1786	-0.732	CEP63///ANAPC13	centrosomal protein 63///anaphase promoting complex subunit 13
8104723	5.83e-06	3.26e-07	-6.94	6.16728	-1.57
8046895	5.87e-06	3.29e-07	6.93	6.15991	1.31	FAM171B	family with sequence similarity 171 member B
7963024	5.92e-06	3.32e-07	6.93	6.14934	0.741	LMBR1L	limb development membrane protein 1 like
8114787	5.92e-06	3.32e-07	-6.93	6.14895	-1.41	GNPDA1	glucosamine-6-phosphate deaminase 1
8102998	5.93e-06	3.33e-07	-6.93	6.1474	-2.42	GYPA	glycophorin A (MNS blood group)
7986428	5.94e-06	3.34e-07	6.93	6.14466	1.01	LOC400464	ubiquitin conjugating enzyme E2 Q2 pseudogene
8074473	5.94e-06	3.34e-07	6.93	6.14377	0.796	CLDN5	claudin 5
7955736	5.95e-06	3.34e-07	-6.93	6.14297	-0.744	ESPL1	extra spindle pole bodies like 1, separase
8046333	6.09e-06	3.42e-07	6.92	6.11888	1.1	CYBRD1	cytochrome b reductase 1
7996448	6.12e-06	3.44e-07	6.92	6.11277	1.52	KIAA0895L///NOL3	KIAA0895 like///nucleolar protein 3
8010841	6.12e-06	3.44e-07	-6.92	6.11252	-2.33	FN3K	fructosamine 3 kinase
8146500	6.17e-06	3.48e-07	6.91	6.1034	1.41	LYN	LYN proto-oncogene, Src family tyrosine kinase
8022817	6.18e-06	3.48e-07	-6.91	6.10176	-0.928	KLHL14	kelch like family member 14
8110821	6.25e-06	3.52e-07	6.91	6.08936	3.2	SLC6A3	solute carrier family 6 member 3
7923578	6.25e-06	3.53e-07	6.91	6.08837	1.38	FMOD	fibromodulin
7895020	6.25e-06	3.53e-07	6.9	6.08779	0.957
8169145	6.36e-06	3.6e-07	-6.9	6.06885	-1.39	MUM1L1	MUM1 like 1
8086689	6.36e-06	3.6e-07	-6.9	6.06841	-1.59	MYL3	myosin light chain 3
7996241	6.36e-06	3.6e-07	-6.9	6.06834	-0.418	SETD6	SET domain containing 6
7992347	6.4e-06	3.62e-07	6.89	6.06181	0.832	MAPK8IP3	mitogen-activated protein kinase 8 interacting protein 3
7913450	6.4e-06	3.62e-07	6.89	6.06086	2.47	LDLRAD2///HSPG2	low density lipoprotein receptor class A domain containing 2///heparan sulfate proteoglycan 2
8098654	6.42e-06	3.63e-07	-6.89	6.05807	-1.35	KLKB1	kallikrein B1
8006906	6.42e-06	3.64e-07	-6.89	6.05652	-1.28	ERBB2	erb-b2 receptor tyrosine kinase 2
7985023	6.5e-06	3.68e-07	6.89	6.04444	0.503
7934299	6.51e-06	3.69e-07	6.89	6.04158	0.579	NUDT13	nudix hydrolase 13
7934161	6.54e-06	3.71e-07	6.88	6.03721	1.63	PRF1	perforin 1
7977965	6.57e-06	3.73e-07	-6.88	6.03186	-1.17	SLC22A17	solute carrier family 22 member 17
7985310	6.59e-06	3.74e-07	-6.88	6.02804	-0.533	ABHD17C	abhydrolase domain containing 17C
7954899	6.59e-06	3.75e-07	-6.88	6.02739	-2.18	CNTN1	contactin 1
7905308	6.59e-06	3.75e-07	-6.88	6.02711	-0.497	BNIPL	BCL2 interacting protein like
8117890	6.59e-06	3.75e-07	6.88	6.02697	0.961	HLA-E///HLA-B///HLA-B	major histocompatibility complex, class I, E///major histocompatibility complex, class I, B///major histocompatibility complex, class I, B
8010212	6.64e-06	3.78e-07	6.88	6.01742	0.733	TMC8	transmembrane channel like 8
7966268	6.67e-06	3.8e-07	6.87	6.01301	1.45	GIT2	GIT ArfGAP 2
8120602	6.73e-06	3.84e-07	6.87	6.00267	1.3	OGFRL1	opioid growth factor receptor like 1
8016215	6.73e-06	3.84e-07	6.87	6.00226	0.601	ARHGAP27	Rho GTPase activating protein 27
7990555	6.76e-06	3.86e-07	-6.87	5.99671	-1.23	NRG4	neuregulin 4
8044793	6.76e-06	3.86e-07	6.87	5.99652	0.706	STEAP3	STEAP3 metalloreductase
7982854	6.77e-06	3.87e-07	6.87	5.9957	2.92	DLL4	delta like canonical Notch ligand 4
7961532	6.83e-06	3.91e-07	6.86	5.98504	1.95	ARHGDIB	Rho GDP dissociation inhibitor beta
8105013	6.84e-06	3.91e-07	6.86	5.98386	0.578	EGFLAM	EGF like, fibronectin type III and laminin G domains
8011747	6.87e-06	3.93e-07	-6.86	5.97816	-0.908	SLC25A11	solute carrier family 25 member 11
7903667	6.91e-06	3.95e-07	-6.86	5.973	-1.09	SYPL2	synaptophysin like 2
8087833	6.93e-06	3.97e-07	6.86	5.96887	1.13	DUSP7	dual specificity phosphatase 7
8136938	6.99e-06	4.01e-07	6.85	5.95785	1.62
8143599	6.99e-06	4.01e-07	6.85	5.95785	1.62
7913858	6.99e-06	4.01e-07	-6.85	5.95781	-1.49	PAQR7	progestin and adipoQ receptor family member 7
8146687	7.01e-06	4.02e-07	-6.85	5.9547	-1.9	ADHFE1	alcohol dehydrogenase, iron containing 1
8013319	7.02e-06	4.03e-07	6.85	5.9524	2.04	GRAP	GRB2-related adaptor protein
8068697	7.05e-06	4.05e-07	6.85	5.94821	1.56	MX2	MX dynamin like GTPase 2
8160805	7.08e-06	4.07e-07	6.84	5.94291	0.865	FAM219A	family with sequence similarity 219 member A
7975661	7.09e-06	4.08e-07	-6.84	5.94148	-1.06	COQ6	coenzyme Q6, monooxygenase
8043203	7.1e-06	4.08e-07	6.84	5.93999	0.93	VAMP5	vesicle associated membrane protein 5
7933750	7.11e-06	4.09e-07	-6.84	5.93782	-3.61	SLC16A9	solute carrier family 16 member 9
8095566	7.15e-06	4.12e-07	-6.84	5.93093	-1.15	MOB1B	MOB kinase activator 1B
8142345	7.18e-06	4.14e-07	6.84	5.92677	1.44	DOCK4	dedicator of cytokinesis 4
8147030	7.22e-06	4.16e-07	6.84	5.92075	0.91	STMN2	stathmin 2
7982028	7.31e-06	4.22e-07	-6.83	5.90635	-2.25	SNORD115-24///SNORD115-44///SNORD115-43///SNORD115-42///SNORD115-41///SNORD115-40///SNORD115-39///SNORD115-38///SNORD115-36///SNORD115-35///SNORD115-34///SNORD115-33///SNORD115-31///SNORD115-30///SNORD115-29///SNORD115-26///SNORD115-22///SNORD115-20///SNORD115-19///SNORD115-18///SNORD115-17///SNORD115-16///SNORD115-14///SNORD115-13///SNORD115-12///SNORD115-11///SNORD115-10///SNORD115-9///SNORD115…	small nucleolar RNA, C/D box 115-24///small nucleolar RNA, C/D box 115-44///small nucleolar RNA, C/D box 115-43///small nucleolar RNA, C/D box 115-42///small nucleolar RNA, C/D box 115-41///small nucleolar RNA, C/D box 115-40///small nucleolar RNA, C/D box 115-39///small nucleolar RNA, C/D box 115-38///small nucleolar RNA, C/D box 115-36///small nucleolar RNA, C/D box 115-35///small nucleolar RNA…
7982064	7.31e-06	4.22e-07	-6.83	5.90635	-2.25	SNORD115-24///SNORD115-44///SNORD115-43///SNORD115-42///SNORD115-41///SNORD115-40///SNORD115-39///SNORD115-38///SNORD115-36///SNORD115-35///SNORD115-34///SNORD115-33///SNORD115-31///SNORD115-30///SNORD115-29///SNORD115-26///SNORD115-22///SNORD115-20///SNORD115-19///SNORD115-18///SNORD115-17///SNORD115-16///SNORD115-14///SNORD115-13///SNORD115-12///SNORD115-11///SNORD115-10///SNORD115-9///SNORD115…	small nucleolar RNA, C/D box 115-24///small nucleolar RNA, C/D box 115-44///small nucleolar RNA, C/D box 115-43///small nucleolar RNA, C/D box 115-42///small nucleolar RNA, C/D box 115-41///small nucleolar RNA, C/D box 115-40///small nucleolar RNA, C/D box 115-39///small nucleolar RNA, C/D box 115-38///small nucleolar RNA, C/D box 115-36///small nucleolar RNA, C/D box 115-35///small nucleolar RNA…
7982078	7.31e-06	4.22e-07	-6.83	5.90635	-2.25	SNORD115-24///SNORD115-44///SNORD115-43///SNORD115-42///SNORD115-41///SNORD115-40///SNORD115-39///SNORD115-38///SNORD115-36///SNORD115-35///SNORD115-34///SNORD115-33///SNORD115-31///SNORD115-30///SNORD115-29///SNORD115-26///SNORD115-22///SNORD115-20///SNORD115-19///SNORD115-18///SNORD115-17///SNORD115-16///SNORD115-14///SNORD115-13///SNORD115-12///SNORD115-11///SNORD115-10///SNORD115-9///SNORD115…	small nucleolar RNA, C/D box 115-24///small nucleolar RNA, C/D box 115-44///small nucleolar RNA, C/D box 115-43///small nucleolar RNA, C/D box 115-42///small nucleolar RNA, C/D box 115-41///small nucleolar RNA, C/D box 115-40///small nucleolar RNA, C/D box 115-39///small nucleolar RNA, C/D box 115-38///small nucleolar RNA, C/D box 115-36///small nucleolar RNA, C/D box 115-35///small nucleolar RNA…
7982092	7.31e-06	4.22e-07	-6.83	5.90635	-2.25	SNORD115-24///SNORD115-44///SNORD115-43///SNORD115-41///SNORD115-40///SNORD115-39///SNORD115-38///SNORD115-36///SNORD115-35///SNORD115-34///SNORD115-33///SNORD115-31///SNORD115-30///SNORD115-29///SNORD115-26///SNORD115-22///SNORD115-20///SNORD115-19///SNORD115-18///SNORD115-17///SNORD115-16///SNORD115-13///SNORD115-12///SNORD115-11///SNORD115-10///SNORD115-9///SNORD115-8///SNORD115-6///SNORD115-5…	small nucleolar RNA, C/D box 115-24///small nucleolar RNA, C/D box 115-44///small nucleolar RNA, C/D box 115-43///small nucleolar RNA, C/D box 115-41///small nucleolar RNA, C/D box 115-40///small nucleolar RNA, C/D box 115-39///small nucleolar RNA, C/D box 115-38///small nucleolar RNA, C/D box 115-36///small nucleolar RNA, C/D box 115-35///small nucleolar RNA, C/D box 115-34///small nucleolar RNA…
7939376	7.31e-06	4.23e-07	6.83	5.90491	1.58	LDLRAD3	low density lipoprotein receptor class A domain containing 3
8053797	7.32e-06	4.23e-07	6.83	5.90366	1.59
7929032	7.39e-06	4.27e-07	6.82	5.8936	1.31	FAS	Fas cell surface death receptor
8180259	7.39e-06	4.28e-07	6.82	5.89298	1.94
8131719	7.42e-06	4.3e-07	6.82	5.88823	3.07	CDCA7L///DNAH11	cell division cycle associated 7 like///dynein axonemal heavy chain 11
7906764	7.5e-06	4.34e-07	6.82	5.87716	0.592	HSPA6	heat shock protein family A (Hsp70) member 6
7977615	7.5e-06	4.35e-07	6.82	5.87652	1.03	RNASE1	ribonuclease A family member 1, pancreatic
8087925	7.5e-06	4.36e-07	-6.82	5.87438	-0.956	TNNC1	troponin C1, slow skeletal and cardiac type
7982058	7.5e-06	4.36e-07	-6.82	5.8743	-2.25	SNORD115-24///SNORD115-44///SNORD115-43///SNORD115-41///SNORD115-39///SNORD115-38///SNORD115-36///SNORD115-33///SNORD115-31///SNORD115-29///SNORD115-26///SNORD115-22///SNORD115-16///SNORD115-12///SNORD115-11///SNORD115-9///SNORD115-5///SNORD115-3///SNRPN	small nucleolar RNA, C/D box 115-24///small nucleolar RNA, C/D box 115-44///small nucleolar RNA, C/D box 115-43///small nucleolar RNA, C/D box 115-41///small nucleolar RNA, C/D box 115-39///small nucleolar RNA, C/D box 115-38///small nucleolar RNA, C/D box 115-36///small nucleolar RNA, C/D box 115-33///small nucleolar RNA, C/D box 115-31///small nucleolar RNA, C/D box 115-29///small nucleolar RNA…
8136863	7.5e-06	4.36e-07	-6.82	5.87419	-1.54	TMEM139	transmembrane protein 139
8094456	7.5e-06	4.36e-07	-6.82	5.87351	-0.869	SMIM20	small integral membrane protein 20
7940409	7.54e-06	4.39e-07	6.81	5.86764	1.03	CD5	CD5 molecule
7909503	7.65e-06	4.45e-07	6.81	5.85227	0.815	SERTAD4	SERTA domain containing 4
7991581	7.67e-06	4.47e-07	6.81	5.84898	0.999	CHSY1	chondroitin sulfate synthase 1
7906475	7.71e-06	4.49e-07	6.8	5.84332	0.975	FCRL6	Fc receptor like 6
8164343	7.77e-06	4.53e-07	-6.8	5.83551	-1.03	FAM102A	family with sequence similarity 102 member A
7926786	7.77e-06	4.53e-07	6.8	5.83438	1.59	APBB1IP	amyloid beta precursor protein binding family B member 1 interacting protein
7896696	7.78e-06	4.53e-07	6.8	5.83364	0.844
7942417	7.78e-06	4.54e-07	6.8	5.83193	1.01	ARHGEF17	Rho guanine nucleotide exchange factor 17
7993019	7.82e-06	4.56e-07	-6.8	5.82706	-0.535	NUDT16L1	nudix hydrolase 16 like 1
7982016	7.86e-06	4.6e-07	-6.79	5.82017	-2.2	SNORD115-24///SNORD115-43///SNORD115-42///SNORD115-40///SNORD115-36///SNORD115-29///SNORD115-25///SNORD115-20///SNORD115-19///SNORD115-18///SNORD115-17///SNORD115-15///SNORD115-14///SNORD115-13///SNORD115-12///SNORD115-11///SNORD115-10///SNORD115-9///SNORD115-5///SNORD115-4///SNORD115-1	small nucleolar RNA, C/D box 115-24///small nucleolar RNA, C/D box 115-43///small nucleolar RNA, C/D box 115-42///small nucleolar RNA, C/D box 115-40///small nucleolar RNA, C/D box 115-36///small nucleolar RNA, C/D box 115-29///small nucleolar RNA, C/D box 115-25///small nucleolar RNA, C/D box 115-20///small nucleolar RNA, C/D box 115-19///small nucleolar RNA, C/D box 115-18///small nucleolar RNA…
7982024	7.86e-06	4.6e-07	-6.79	5.82017	-2.2	SNORD115-24///SNORD115-44///SNORD115-43///SNORD115-42///SNORD115-40///SNORD115-39///SNORD115-38///SNORD115-36///SNORD115-34///SNORD115-33///SNORD115-30///SNORD115-29///SNORD115-25///SNORD115-22///SNORD115-21///SNORD115-20///SNORD115-19///SNORD115-18///SNORD115-17///SNORD115-16///SNORD115-15///SNORD115-14///SNORD115-13///SNORD115-12///SNORD115-11///SNORD115-10///SNORD115-9///SNORD115-8///SNORD115-…	small nucleolar RNA, C/D box 115-24///small nucleolar RNA, C/D box 115-44///small nucleolar RNA, C/D box 115-43///small nucleolar RNA, C/D box 115-42///small nucleolar RNA, C/D box 115-40///small nucleolar RNA, C/D box 115-39///small nucleolar RNA, C/D box 115-38///small nucleolar RNA, C/D box 115-36///small nucleolar RNA, C/D box 115-34///small nucleolar RNA, C/D box 115-33///small nucleolar RNA…
7982030	7.86e-06	4.6e-07	-6.79	5.82017	-2.2	SNORD115-24///SNORD115-44///SNORD115-43///SNORD115-42///SNORD115-40///SNORD115-39///SNORD115-38///SNORD115-36///SNORD115-34///SNORD115-33///SNORD115-30///SNORD115-29///SNORD115-25///SNORD115-22///SNORD115-21///SNORD115-20///SNORD115-19///SNORD115-18///SNORD115-17///SNORD115-16///SNORD115-15///SNORD115-14///SNORD115-13///SNORD115-12///SNORD115-11///SNORD115-10///SNORD115-9///SNORD115-6///SNORD115-…	small nucleolar RNA, C/D box 115-24///small nucleolar RNA, C/D box 115-44///small nucleolar RNA, C/D box 115-43///small nucleolar RNA, C/D box 115-42///small nucleolar RNA, C/D box 115-40///small nucleolar RNA, C/D box 115-39///small nucleolar RNA, C/D box 115-38///small nucleolar RNA, C/D box 115-36///small nucleolar RNA, C/D box 115-34///small nucleolar RNA, C/D box 115-33///small nucleolar RNA…
8175217	7.89e-06	4.62e-07	-6.79	5.81519	-1.48	GPC4	glypican 4
7967544	7.89e-06	4.62e-07	6.79	5.81455	2.11	SCARB1	scavenger receptor class B member 1
8034821	7.91e-06	4.63e-07	-6.79	5.81267	-0.87	PTGER1	prostaglandin E receptor 1
7920123	7.91e-06	4.63e-07	6.79	5.81197	1.33	S100A10	S100 calcium binding protein A10
8072229	7.94e-06	4.65e-07	-6.79	5.80761	-0.608	NEFH	neurofilament heavy polypeptide
7926170	7.94e-06	4.66e-07	-6.79	5.80698	-2.04	DHTKD1	dehydrogenase E1 and transketolase domain containing 1
8042416	7.96e-06	4.67e-07	6.79	5.80372	1.61	ARHGAP25	Rho GTPase activating protein 25
7926297	8.01e-06	4.71e-07	-6.78	5.79624	-1.01
8029536	8.01e-06	4.71e-07	6.78	5.7956	1.68	APOC1	apolipoprotein C1
7928395	8.12e-06	4.77e-07	6.78	5.78138	1.68	FLJ44715///FUT11	uncharacterized LOC386671///fucosyltransferase 11
8019842	8.13e-06	4.78e-07	6.78	5.77967	1.15	TYMS	thymidylate synthetase
7928046	8.15e-06	4.8e-07	6.78	5.77684	0.976	TSPAN15	tetraspanin 15
7902227	8.15e-06	4.8e-07	-6.78	5.77617	-1.4	GADD45A	growth arrest and DNA damage inducible alpha
8048340	8.21e-06	4.83e-07	6.77	5.76866	0.704	CNOT9	CCR4-NOT transcription complex subunit 9
8163637	8.26e-06	4.86e-07	6.77	5.76244	1.87	TNC	tenascin C
8151423	8.27e-06	4.87e-07	-6.77	5.76061	-0.657	JPH1	junctophilin 1
7982056	8.27e-06	4.88e-07	-6.77	5.75872	-1.02	SNORD115-25	small nucleolar RNA, C/D box 115-25
7956097	8.27e-06	4.88e-07	-6.77	5.75854	-1.53	SUOX	sulfite oxidase
8042439	8.27e-06	4.88e-07	6.77	5.7585	1.52	ANTXR1	anthrax toxin receptor 1
8116113	8.28e-06	4.89e-07	6.77	5.75634	0.61	FAM193B	family with sequence similarity 193 member B
7898357	8.29e-06	4.9e-07	-6.77	5.7546	-1.89	MST1L///MST1P2///MST1	macrophage stimulating 1 like///macrophage stimulating 1 pseudogene 2///macrophage stimulating 1
7929882	8.29e-06	4.9e-07	-6.77	5.75434	-1.08	SEMA4G	semaphorin 4G
7969665	8.35e-06	4.94e-07	-6.76	5.74708	-0.368	HS6ST3	heparan sulfate 6-O-sulfotransferase 3
7983969	8.35e-06	4.94e-07	6.76	5.74669	1.09	CCNB2	cyclin B2
7923700	8.42e-06	4.98e-07	-6.76	5.73785	-0.692	LRRN2	leucine rich repeat neuronal 2
8124531	8.49e-06	5.03e-07	6.76	5.72883	2.34	HIST1H3I	histone cluster 1, H3i
8157487	8.51e-06	5.05e-07	-6.76	5.72522	-1.92	PAPPA-AS1///PAPPA	PAPPA antisense RNA 1///pappalysin 1
8025053	8.54e-06	5.06e-07	6.75	5.72178	1.02	TNFSF9	tumor necrosis factor superfamily member 9
8157253	8.54e-06	5.07e-07	-6.75	5.72053	-1.31	SNX30	sorting nexin family member 30
8173941	8.54e-06	5.07e-07	-6.75	5.71987	-1.24	TSPAN6	tetraspanin 6
7998983	8.54e-06	5.07e-07	6.75	5.71981	0.496	NLRC3	NLR family CARD domain containing 3
8024170	8.57e-06	5.1e-07	6.75	5.71424	0.796	ARHGAP45	Rho GTPase activating protein 45
8107985	8.57e-06	5.1e-07	-6.75	5.71374	-0.76	CCNI2///SEPT8	cyclin I family member 2///septin 8
8053834	8.57e-06	5.1e-07	6.75	5.71369	1.86	ANKRD36///ANKRD36B	ankyrin repeat domain 36///ankyrin repeat domain 36B
8113502	8.57e-06	5.1e-07	6.75	5.71362	1.24
7896703	8.57e-06	5.11e-07	6.75	5.71351	1.39
7922018	8.58e-06	5.11e-07	-6.75	5.71214	-1.22	ILDR2	immunoglobulin like domain containing receptor 2
8100893	8.6e-06	5.13e-07	-6.75	5.70934	-1.14	COX18	COX18, cytochrome c oxidase assembly factor
8171653	8.6e-06	5.13e-07	-6.75	5.70862	-1.14	MAP3K15///PDHA1	mitogen-activated protein kinase kinase kinase 15///pyruvate dehydrogenase (lipoamide) alpha 1
8064904	8.68e-06	5.18e-07	-6.74	5.6986	-2	FERMT1	fermitin family member 1
8014066	8.68e-06	5.18e-07	6.74	5.69817	2.49	EVI2A	ecotropic viral integration site 2A
8067955	8.68e-06	5.18e-07	-6.74	5.69785	-1.3	CXADR	coxsackie virus and adenovirus receptor
8128726	8.69e-06	5.2e-07	-6.74	5.69573	-1.2	PPIL6	peptidylprolyl isomerase like 6
8103822	8.7e-06	5.2e-07	6.74	5.69404	1.36	VEGFC	vascular endothelial growth factor C
8105899	8.71e-06	5.21e-07	-6.74	5.69268	-2.36	MARVELD2	MARVEL domain containing 2
8177498	8.71e-06	5.21e-07	-6.74	5.69268	-2.36	MARVELD2	MARVEL domain containing 2
8005661	8.71e-06	5.22e-07	6.74	5.69138	0.855	SPECC1	sperm antigen with calponin homology and coiled-coil domains 1
7893262	8.73e-06	5.23e-07	-6.74	5.6886	-1.11
8038584	8.73e-06	5.23e-07	6.74	5.68856	0.518	LRRC4B	leucine rich repeat containing 4B
7918426	8.73e-06	5.23e-07	-6.74	5.68839	-1.89	SLC16A4	solute carrier family 16 member 4
8118564	8.73e-06	5.24e-07	6.74	5.68769	1.3	HLA-DQA2///HLA-DQA1	major histocompatibility complex, class II, DQ alpha 2///major histocompatibility complex, class II, DQ alpha 1
[truncated: 31,299 more rows]

## Sheet: Table.S1C
GSE973527.top
adj.P.Val	P.Value	t	B	logFC	GB_ACC	Gene.Symbol	SPOT_ID
5.46e-07	1.11e-11	-39.3501	15.8595	-5.24733	NM_015894.2	STMN3
6.04e-07	2.45e-11	-36.1214	15.3862	-5.16375	NM_001145808.1	ITGAM
8.64e-07	5.25e-11	-33.2601	14.8958	-4.81813	NM_001008394.1	EID3
1.35e-06	1.76e-10	-29.178	14.0516	-4.34477	NM_020731.3	AHRR
1.35e-06	1.8e-10	29.1048	14.0347	3.90784	AK299373.1	CEP68
1.35e-06	1.88e-10	-28.9794	14.0055	-4.32802	NM_001145808.1	ITGAM
1.35e-06	1.94e-10	-28.8777	13.9816	-3.87657	BC039582.1	DNAI2
1.35e-06	2.32e-10	-28.3219	13.8489	-3.89369	NM_014587.3	SOX8
1.35e-06	2.46e-10	-28.1439	13.8055	-3.4747	NM_032464.2	LAT2
1.5e-06	3.04e-10	-27.5043	13.6458	-4.71231	BC031233.1	CATSPERD
1.72e-06	4.54e-10	-26.3279	13.336	-4.24911	NM_032289.2	PSD2
1.72e-06	4.68e-10	-26.2451	13.3134	-3.97786	BC032712.1	WBSCR16
1.72e-06	4.68e-10	26.2428	13.3128	3.95624	AK299098.1	AARS
1.72e-06	5e-10	-26.0533	13.2606	-4.87175	NM_031308.1	EPPK1
1.72e-06	5.21e-10	-25.9385	13.2287	-3.0707	NM_014443.2	IL17B
1.77e-06	5.75e-10	-25.6634	13.1513	-4.43953	NM_000299.2	PKP1
2.21e-06	7.71e-10	-24.8582	12.9175	-4.32356	BX648217.1	SLC5A5
2.21e-06	8.05e-10	24.743	12.8831	3.97202	BM982469	TLCD1
2.67e-06	1.07e-09	-23.9777	12.6483	-5.03525	NM_177987.1	TUBB7P /// TUBB8 /// TUBB8P7 /// TUBBP5
2.67e-06	1.15e-09	-23.8082	12.5948	-3.55244	NM_177987.1	TUBB8
2.67e-06	1.19e-09	-23.7162	12.5655	-4.08433	NM_007161.2	LST1
2.67e-06	1.19e-09	23.7074	12.5627	3.44434	AF132948.1	AMDHD2
3.28e-06	1.53e-09	-23.0758	12.357	-3.71769		EPPK1
3.39e-06	1.65e-09	-22.8832	12.2926	-3.11125	AL540196	SLA
3.54e-06	1.79e-09	22.6776	12.2231	3.85796	NM_001605.2	AARS
3.89e-06	2.08e-09	-22.3117	12.097	-2.88192	NM_003885.2	CDK5R1
3.89e-06	2.13e-09	-22.2574	12.0781	-2.99265	BX377473	STMN3
3.94e-06	2.23e-09	22.139	12.0365	2.70258	AL563987	CBS /// CBSL
4.06e-06	2.38e-09	21.9833	11.9814	3.42588	AK292869.1	KIAA0141
4.08e-06	2.48e-09	-21.887	11.947	-3.07563	AW207788	C6orf52
4.09e-06	2.57e-09	-21.8021	11.9165	-4.49942	DB312716	SNX31
4.14e-06	2.69e-09	21.6981	11.8789	2.40097	U02389.1	LONP1
4.32e-06	2.96e-09	21.4679	11.7948	3.01358	NM_024591.4	CHMP6
4.32e-06	3e-09	21.4355	11.7829	2.38602	AK298531.1	LONP1
4.32e-06	3.12e-09	21.3472	11.7502	3.32136	AA746639	AMDHD2
4.32e-06	3.15e-09	-21.3215	11.7407	-2.7206	NM_000540.2	RYR1
4.73e-06	3.55e-09	-21.048	11.6382	-3.38328	CR749395.1	LOC728715 /// OVOS /// OVOS2
4.81e-06	3.77e-09	20.9106	11.586	2.56278	BC001968.1	CDK9
4.81e-06	3.8e-09	-20.8894	11.5779	-2.89251	AI699506	MSANTD1
5.05e-06	4.1e-09	-20.7184	11.5122	-2.96584	AK296608.1	TRABD2A
5.05e-06	4.19e-09	-20.6661	11.492	-2.84642	AF250288.1	DNAI2
5.54e-06	4.71e-09	20.4036	11.3893	2.84079	NM_001145784.1	BORCS8
5.62e-06	5.06e-09	20.245	11.3264	2.37986	NM_004793.2	LONP1
5.62e-06	5.08e-09	-20.2384	11.3238	-3.84814	NM_003862.1	FGF18
5.62e-06	5.13e-09	20.2176	11.3155	2.43719	NM_001032372.1	ZNF226
6e-06	5.59e-09	20.0256	11.2383	3.36551	CN360670	DNAJC18
6.58e-06	6.27e-09	19.7777	11.1372	2.31708	AY869728.1	EXOC7
6.71e-06	6.52e-09	-19.6922	11.1019	-4.67639	NM_022468.4	MMP25
6.87e-06	6.89e-09	19.5743	11.0529	3.10362	NM_005873.2	RGS19
6.87e-06	6.95e-09	-19.5535	11.0442	-2.23363	AK304786.1	TRIO
7.12e-06	7.43e-09	-19.4111	10.9845	-2.29292	NM_198719.1	PTGER3
7.12e-06	7.5e-09	19.3914	10.9761	2.4843	BM904784	ZNF697
7.52e-06	8.07e-09	19.2371	10.9106	2.01951	AB062286.1	PEX19
7.55e-06	8.35e-09	-19.1641	10.8795	-3.72936	NR_003704.2	SNORA84
7.55e-06	8.41e-09	19.1486	10.8728	3.91654	CB218922	CEP68
7.76e-06	8.81e-09	-19.0515	10.8309	-2.27007	BX640655.1	CPLX4
7.76e-06	8.96e-09	19.0173	10.8161	2.64199	AL563987	CBS /// CBSL
7.76e-06	9.12e-09	-18.9812	10.8005	-2.53982	NM_031476.3	CRISPLD2
7.87e-06	9.4e-09	-18.9166	10.7724	-2.65379	NM_009590.2	AOC2
8.12e-06	9.87e-09	18.8161	10.7284	2.7884	AK291211.1	SARDH
8.33e-06	1.03e-08	-18.7304	10.6906	-2.75761	BC096347.3	ITGAM
8.65e-06	1.09e-08	-18.6195	10.6415	-2.46938	DB348133	TUBBP5
8.7e-06	1.11e-08	18.5736	10.621	3.41651	NM_020746.3	MAVS
9.41e-06	1.23e-08	18.3594	10.5246	2.16415	NM_001135752.1	ECD
9.41e-06	1.25e-08	-18.3304	10.5115	-2.65222	NR_024610.1	HINT1
9.41e-06	1.26e-08	-18.321	10.5072	-5.18323	NM_001145640.1	ZFR2
9.75e-06	1.32e-08	-18.2195	10.4609	-2.06701	R99578	LTBP1
9.88e-06	1.36e-08	-18.1637	10.4353	-3.17743	AK096220.1	ZDHHC11 /// ZDHHC11B
9.9e-06	1.38e-08	18.1297	10.4196	2.6483	AF162428.1	SARDH
9.93e-06	1.41e-08	18.0962	10.4042	2.4273	AK095647.1	PLCXD2
1.08e-05	1.55e-08	17.9003	10.3131	2.91532	BX537366.1	LRRC41
1.08e-05	1.58e-08	17.8682	10.2981	2.85394	AJ223317.1	SARDH
1.15e-05	1.71e-08	17.7072	10.2221	2.9233	AL832960.1	TRIM41
1.15e-05	1.73e-08	17.6952	10.2164	3.79388	NM_006331.6	EMG1
1.15e-05	1.8e-08	-17.6113	10.1764	-3.41096	NM_000552.3	VWF
1.15e-05	1.81e-08	-17.6036	10.1728	-4.31367	NM_178138.3	LHX3
1.15e-05	1.82e-08	-17.5945	10.1684	-2.17497	NM_021615.4	CHST6
1.15e-05	1.82e-08	17.5884	10.1655	2.7213	CR620877.1	LMF1
1.16e-05	1.86e-08	17.5457	10.145	2.94296	NM_032344.2	NUDT22
1.23e-05	1.99e-08	17.4166	10.0827	2.48105	BC112267.1	SLC16A3
1.24e-05	2.05e-08	17.3658	10.0581	2.30588	NM_001042422.1	SLC16A3
1.24e-05	2.07e-08	17.346	10.0485	2.99512	AW082840	ST6GALNAC4
1.24e-05	2.08e-08	-17.3332	10.0422	-2.11794	NM_020402.2	CHRNA10
1.24e-05	2.1e-08	-17.3126	10.0322	-1.92455	NM_001136482.1	C19orf38
1.25e-05	2.17e-08	-17.2509	10.002	-3.26888	NM_007030.2	TPPP
1.25e-05	2.18e-08	17.2425	9.99784	2.58193	AB014543.1	CLUAP1
1.25e-05	2.21e-08	17.218	9.98583	3.50161	BF570422	ORAI3
1.29e-05	2.32e-08	17.1226	9.9388	2.60418	NM_130810.2	DYX1C1
1.29e-05	2.34e-08	17.1132	9.93411	2.37791	BC071697.1	EVA1B
1.29e-05	2.35e-08	-17.1054	9.93028	-4.19828	NM_006294.3	UQCRB
1.34e-05	2.48e-08	-17.0044	9.88004	-3.46017	NM_025202.2	EFHD1
1.34e-05	2.53e-08	16.9663	9.86098	2.65763	AW969617	B3GALT6
1.34e-05	2.53e-08	-16.9616	9.85862	-1.99738	CB305505	MUC20
1.37e-05	2.61e-08	-16.9047	9.83008	-2.95169	NM_002531.2	NTSR1
1.61e-05	3.13e-08	16.5676	9.65854	1.84462	AF308803.1	VPS33B
1.61e-05	3.16e-08	-16.549	9.64892	-2.52555	BC032712.1	WBSCR16
1.61e-05	3.19e-08	-16.5323	9.6403	-5.78668	BU615833	LINC00341 /// SYNE3
1.61e-05	3.2e-08	-16.5291	9.63868	-2.23546	BC117678.2	ANKHD1 /// ANKHD1-EIF4EBP3
1.62e-05	3.24e-08	-16.504	9.62567	-2.66689	AA928506	RSL1D1
1.62e-05	3.29e-08	-16.4808	9.61367	-5.4716	AY358189.1	KCNQ2
1.64e-05	3.39e-08	16.4252	9.58476	3.12991	L14577.1	CBS /// CBSL
1.64e-05	3.39e-08	-16.4249	9.58462	-2.58684	BC139732.1	SPIRE2
1.66e-05	3.46e-08	16.3867	9.56468	2.42345	BC007775.2	ZNF346
1.66e-05	3.49e-08	16.3707	9.55635	2.34739	BX382139	CHKB /// CHKB-CPT1B
1.66e-05	3.56e-08	16.3373	9.53883	3.15297	AL563987	CBS /// CBSL
1.66e-05	3.57e-08	-16.3281	9.53405	-3.84026	NM_001001552.3	LEMD1
1.68e-05	3.64e-08	16.2961	9.51721	1.90747	BM007277	DHRSX
1.72e-05	3.77e-08	16.2339	9.48444	2.69756	AK291211.1	SARDH
1.81e-05	4.06e-08	-16.0996	9.41317	-1.96568	CR616411.1	BCCIP
1.81e-05	4.07e-08	16.0954	9.41093	2.92242	NM_153339.1	PUSL1
1.81e-05	4.11e-08	-16.0778	9.40157	-3.00123	NM_000771.3	CYP2C9
1.81e-05	4.12e-08	-16.0717	9.39827	-1.98012	BC137217.1	YY2
1.81e-05	4.14e-08	-16.0629	9.39357	-2.30766	NM_152792.2	ASPRV1
1.81e-05	4.21e-08	-16.0359	9.37911	-3.0633	BC027926.1	CD1D
1.81e-05	4.22e-08	16.0317	9.37686	1.87549	NM_001123378.1	ADSL
1.83e-05	4.3e-08	15.9954	9.35741	3.31206	NM_017877.3	SLC35F6
1.84e-05	4.35e-08	15.9758	9.34686	2.28214	AI762464	ZNF226
1.93e-05	4.64e-08	-15.8615	9.28504	-3.0184	AA417560	---
1.93e-05	4.64e-08	-15.8615	9.28504	-3.0184	CK300531	---
1.97e-05	4.79e-08	15.8083	9.2561	2.90738	CR597974.1	SARDH
2.02e-05	4.95e-08	-15.7509	9.22475	-2.03278	AK299965.1	CEL
2.03e-05	5.05e-08	15.7139	9.20449	2.19627	AL512700.1	TMEM234
2.03e-05	5.07e-08	15.7076	9.20104	2.62506	BC026222.2	SMARCC2
2.05e-05	5.14e-08	15.6847	9.18842	2.52752	BX427411	TMEM101
2.06e-05	5.22e-08	-15.6571	9.17321	-1.7438	U03643.1	DHX9
2.16e-05	5.53e-08	-15.5564	9.11746	-2.34763	BC031260.1	SNX31
2.16e-05	5.56e-08	15.5489	9.1133	2.26534	NM_001039613.1	IAH1
2.19e-05	5.68e-08	-15.5097	9.09152	-2.02675	NM_014427.4	CPNE7
2.21e-05	5.77e-08	-15.4848	9.07761	-4.18841	NM_002206.2	ITGA7
2.28e-05	6.01e-08	-15.4147	9.03835	-2.31906	AK291313.1	C1R
2.3e-05	6.13e-08	15.3796	9.0186	2.48499	EF036488.1	MRPL12
2.3e-05	6.16e-08	15.3727	9.0147	1.84803	DB322837	MUS81
2.42e-05	6.53e-08	15.273	8.95834	2.18957	NM_002434.2	MPG
2.45e-05	6.66e-08	15.2396	8.93933	2.47296	AK294932.1	LMF1
2.48e-05	6.77e-08	-15.2102	8.92258	-2.20123	AK300046.1	FAM129C
2.49e-05	6.87e-08	15.1869	8.90931	3.27527	NM_152304.1	RAB42
2.5e-05	6.97e-08	15.1631	8.89566	3.15263	BC039847.1	PLPP1
2.5e-05	6.98e-08	15.1596	8.89367	2.07735	BC039715.1	ANKRD10
2.53e-05	7.13e-08	15.1242	8.87336	2.17301	BC087537.1	GNA12
2.56e-05	7.26e-08	-15.0937	8.85585	-2.19634	NM_152671.3	PIKFYVE
2.58e-05	7.36e-08	-15.0702	8.84234	-1.94641	BC114571.1	PKP1
2.58e-05	7.43e-08	-15.0554	8.83376	-2.81939	NM_178468.3	FAM83C
2.58e-05	7.47e-08	15.0453	8.82794	2.25837	AK300347.1	ARFGAP2
2.65e-05	7.74e-08	-14.9858	8.79351	-1.80065	AK292495.1	ENKUR
2.65e-05	7.8e-08	-14.9741	8.78673	-2.06543	BC052294.1	CD19
2.65e-05	7.85e-08	-14.9618	8.77958	-2.71321	NM_005870.4	SAP18
2.65e-05	7.89e-08	-14.9546	8.77536	-2.57063	BC070164.1	PHC3
2.69e-05	8.08e-08	14.9148	8.75219	2.19554	NM_001004105.2	GRK6
2.69e-05	8.11e-08	14.908	8.74824	2.38873	AK294806.1	RNFT1
2.69e-05	8.2e-08	14.8908	8.73816	3.13359	AB000888.1	PLPP1
2.69e-05	8.23e-08	-14.8846	8.73455	-1.88866	NM_003665.2	FCN3
2.69e-05	8.27e-08	14.8754	8.72917	2.66467	AK097808.1	SLC12A4
2.73e-05	8.45e-08	-14.8403	8.70861	-1.82434	AK294363.1	ZFP36L1
2.76e-05	8.6e-08	-14.8116	8.69172	-2.32998	AK095024.1	PDE2A
2.81e-05	8.83e-08	-14.7683	8.66622	-2.10525	CR610092.1	PTGDS
2.93e-05	9.26e-08	-14.6893	8.61947	-2.13274	NM_024668.2	ANKHD1
2.93e-05	9.32e-08	14.6784	8.61299	2.10522	BC004549.2	DUS3L
3.08e-05	9.87e-08	14.5854	8.55747	2.05175	NM_182901.2	AKIP1
3.12e-05	1.01e-07	14.5482	8.53519	3.08599	NM_006426.2	DPYSL4
3.12e-05	1.01e-07	14.5471	8.53454	2.60792	NM_173348.1	FAM149B1
3.16e-05	1.03e-07	14.518	8.51707	1.95388	NM_001014842.1	TM9SF1
3.22e-05	1.06e-07	-14.4763	8.49193	-1.9212	BC100280.1	ASXL1
3.25e-05	1.08e-07	-14.4347	8.46676	-1.70155	NM_001135697.1	SGCA
3.25e-05	1.08e-07	-14.4326	8.46549	-2.44153	NM_006138.4	MS4A3
3.25e-05	1.09e-07	-14.432	8.46509	-2.52431	BI491993	ANKHD1
3.28e-05	1.11e-07	14.3894	8.43927	2.26289	AK301063.1	CBS /// CBSL
3.28e-05	1.12e-07	-14.3869	8.43777	-1.76553	NM_014427.4	CPNE7
3.28e-05	1.12e-07	14.3851	8.43662	2.52575	AK295232.1	TMEM234
3.28e-05	1.13e-07	-14.3739	8.42981	-2.25211	BC143314.1	ORM1 /// ORM2
3.28e-05	1.14e-07	14.3586	8.42051	1.7624	NM_033046.2	RTKN
3.28e-05	1.14e-07	14.3584	8.42039	2.218	AB033080.2	CCPG1 /// DYX1C1-CCPG1
3.28e-05	1.14e-07	-14.3487	8.41451	-2.30354	BC029782.1	SELPLG
3.29e-05	1.16e-07	-14.3264	8.40088	-2.59674	NM_001143962.1	CAPN8
3.29e-05	1.16e-07	-14.3237	8.39924	-3.72188	DA248657	LOC105379283
3.32e-05	1.18e-07	14.2971	8.38294	2.30291	AK290670.1	IL17RC
3.32e-05	1.18e-07	-14.294	8.38106	-1.84881	NM_145010.2	ENKUR
3.33e-05	1.19e-07	-14.2795	8.37215	-1.81432	NM_020890.2	KIAA1524
3.36e-05	1.22e-07	-14.2486	8.35318	-2.52113	NM_012413.3	QPCT
3.36e-05	1.22e-07	-14.2477	8.35263	-1.97974	BC005147.2	FKBP1A
3.4e-05	1.25e-07	14.2068	8.32748	1.97217	NM_002434.2	MPG
3.4e-05	1.25e-07	14.2016	8.32425	2.648	NM_022105.3	DIDO1
3.4e-05	1.25e-07	14.2016	8.32425	2.648	BC000770.2	DIDO1
3.41e-05	1.26e-07	-14.1901	8.31713	-2.95165	AK057969.1	GIMAP8
3.43e-05	1.28e-07	-14.1718	8.30581	-2.1277	AK094918.1	SPIRE2
3.48e-05	1.31e-07	-14.1349	8.28301	-4.45307	BC038433.1	OPRL1
3.48e-05	1.31e-07	14.131	8.28058	2.16112	CR607703.1	RWDD2B
3.48e-05	1.32e-07	14.1206	8.27411	2.0707	BC009872.2	BCKDK
3.59e-05	1.37e-07	-14.0663	8.24029	-2.2476	NM_001462.3	FPR2
3.73e-05	1.43e-07	13.9968	8.19687	2.38159	NM_080658.1	ACY3
3.75e-05	1.44e-07	13.9778	8.18494	2.39375	NM_004563.2	PCK2
3.75e-05	1.45e-07	-13.9678	8.17862	-3.20117	NM_001039753.2	EML6
3.75e-05	1.46e-07	13.9564	8.17151	2.72464	NM_014620.4	HOXC4
3.75e-05	1.47e-07	13.9533	8.16952	2.23982	NM_016656.3	RRAGB
3.8e-05	1.5e-07	-13.9243	8.15128	-1.68574	NM_001008897.1	TCP1
3.8e-05	1.5e-07	13.92	8.14854	2.66435	AK298276.1	ORAI3
3.8e-05	1.51e-07	-13.9122	8.14365	-1.80797	NM_002661.2	PLCG2
3.86e-05	1.54e-07	13.8765	8.12106	1.85221	NM_006858.2	TMED1
3.86e-05	1.55e-07	13.8662	8.11453	1.85625	NM_080605.3	B3GALT6
3.86e-05	1.55e-07	13.8645	8.11343	2.11534	BC009183.2	ORAI2
3.9e-05	1.58e-07	-13.8346	8.0945	-2.13148	AK290074.1	LAT2
3.9e-05	1.59e-07	-13.8315	8.09247	-2.08407	NM_001807.3	CEL
3.92e-05	1.61e-07	13.8104	8.07906	2.07944	AI762464	ZNF226
3.92e-05	1.61e-07	13.8067	8.07671	1.9877	BC011045.1	EXOC7
3.94e-05	1.63e-07	-13.7922	8.06751	-2.20701	NM_013389.2	NPC1L1
3.94e-05	1.63e-07	13.7864	8.06376	2.38186	AK296436.1	LRRC41
3.96e-05	1.65e-07	-13.7681	8.05207	-1.62354	BC092415.1	TAGLN
4.01e-05	1.69e-07	-13.7367	8.032	-2.24123	BC066929.1	ASPH
4.01e-05	1.69e-07	13.7366	8.03194	2.03081	BC007363.2	BCKDK
4.01e-05	1.7e-07	13.7269	8.02575	1.66452	BC001968.1	CDK9
4.09e-05	1.74e-07	-13.6917	8.00313	-1.53656	AK304615.1	MXRA8
4.11e-05	1.77e-07	-13.6666	7.987	-1.92743	BX648076.1	SBSN
4.11e-05	1.77e-07	13.6595	7.98246	2.11357	NM_173582.3	PGM2L1
4.11e-05	1.78e-07	13.6547	7.97936	2.13717	BC051758.1	SELO
4.11e-05	1.78e-07	-13.6522	7.97774	-2.15244	AA761289	CPLX3
4.11e-05	1.79e-07	13.6467	7.97417	2.13263	NM_001039479.1	AREL1
4.11e-05	1.8e-07	13.6387	7.96899	2.10176	BM979450	SNAPC3
4.11e-05	1.81e-07	-13.632	7.9647	-1.72133	NM_001242.4	CD27
4.11e-05	1.81e-07	-13.6261	7.96088	-2.07441	BC032325.2	TMX3
4.13e-05	1.84e-07	-13.6066	7.94826	-2.22088	NM_006025.2	ENDOU
4.13e-05	1.84e-07	13.6047	7.94705	2.0042	NM_194296.1	SPATA24
4.22e-05	1.89e-07	-13.5626	7.91975	-1.83814	NM_024785.2	FAM124B
4.25e-05	1.91e-07	-13.5456	7.9087	-2.15888	BC093996.1	PLA2G12B
4.32e-05	1.95e-07	13.5151	7.88884	1.96251	AK298348.1	SARDH
4.32e-05	1.96e-07	13.5099	7.88546	2.81963	AK296197.1	RNFT1
4.33e-05	1.97e-07	13.4974	7.87732	1.91108	NM_014951.2	ZNF365
4.36e-05	2e-07	-13.4813	7.86676	-1.49641	NM_031314.2	HNRNPC
4.41e-05	2.03e-07	-13.4575	7.85122	-1.70884	AL533010	MBP
4.44e-05	2.05e-07	13.439	7.83907	1.50675	NM_199349.2	KCP
4.49e-05	2.08e-07	13.4154	7.82357	2.663	BC000840.1	HAGH
4.59e-05	2.15e-07	-13.3707	7.79416	-1.58472	AK290913.1	SEC14L1
4.59e-05	2.16e-07	13.3646	7.79014	2.19174	NM_001142928.1	LRRC61
4.59e-05	2.16e-07	-13.3628	7.78896	-1.65894	NM_031314.2	HNRNPC
4.66e-05	2.2e-07	13.3353	7.77074	1.79806	CR607376.1	MRPS18A
4.66e-05	2.21e-07	13.3282	7.76605	3.15822	NM_033549.3	TRIM41
4.73e-05	2.25e-07	13.2993	7.74688	2.12514	CR604807.1	ARRDC1
4.73e-05	2.27e-07	13.2847	7.73718	1.9365	AY366499.1	ODF2
4.73e-05	2.27e-07	-13.2842	7.73689	-1.8038	NM_000771.3	CYP2C9
4.73e-05	2.29e-07	13.2712	7.72826	1.77937	NM_001015056.1	RTKN
4.73e-05	2.29e-07	13.2711	7.72818	1.60272	NM_001009568.1	SMPDL3B
4.73e-05	2.31e-07	-13.261	7.72143	-4.10349	NM_145658.2	SPESP1
4.73e-05	2.31e-07	-13.2594	7.7204	-2.53082	BC126355.1	ANKRD45
4.73e-05	2.32e-07	-13.2518	7.71533	-1.7824	NM_015086.1	DDN
4.73e-05	2.34e-07	13.245	7.7108	2.57593	AY329087.1	CHMP6
4.73e-05	2.34e-07	13.2447	7.71059	1.98795	NM_003161.2	RPS6KB1
4.76e-05	2.36e-07	-13.2288	7.69998	-1.74721	BE561014	DHX9
4.77e-05	2.39e-07	-13.2114	7.68837	-1.84127	NM_018436.3	ALLC
4.77e-05	2.39e-07	13.208	7.68609	2.05422	NM_001002913.1	PTRH1
4.77e-05	2.4e-07	-13.2058	7.68465	-2.40508	AK291313.1	C1R
4.77e-05	2.41e-07	13.1982	7.67953	1.58245	NM_001098509.1	SGSM2
4.77e-05	2.42e-07	-13.1897	7.67384	-1.91607	NM_022719.2	DGCR14
4.77e-05	2.42e-07	13.1891	7.67343	1.90432	CX788273	DBN1
5.01e-05	2.56e-07	13.1078	7.61885	1.82461	BC006460.1	HEXIM1
5.01e-05	2.57e-07	13.1045	7.61659	2.0733	BQ184803	CARD8
5.03e-05	2.59e-07	13.0944	7.60976	2.23708	NM_021008.2	DEAF1
5.04e-05	2.6e-07	-13.0834	7.60234	-3.38258	NM_001142285.1	RPS24
5.07e-05	2.63e-07	13.0693	7.59282	1.81696	EF531340.1	FAM175A
5.31e-05	2.77e-07	-12.9953	7.54263	-1.99531	NM_001039770.2	TMPPE
5.32e-05	2.79e-07	12.9837	7.53474	1.52754	BC063611.1	PELI1
5.32e-05	2.79e-07	-12.9828	7.53415	-2.22293	NM_001801.2	CDO1
5.38e-05	2.83e-07	-12.9606	7.519	-2.66627	NM_001080525.1	SPINK8
5.4e-05	2.86e-07	12.9477	7.51018	3.57041	NM_001079528.3	ABCC6 /// ABCC6P1 /// ABCC6P2 /// LOC105369239
5.4e-05	2.87e-07	12.9428	7.50687	2.28397	BC038852.1	ANO7
5.49e-05	2.93e-07	12.9104	7.48469	1.82804	NM_001012511.1	GOSR2
5.49e-05	2.94e-07	-12.9081	7.48309	-2.24657	NM_012413.3	QPCT
5.64e-05	3.03e-07	12.8631	7.45221	1.75858	NM_001128225.1	SLC39A13
5.64e-05	3.05e-07	12.8548	7.44652	2.66784	NM_033450.2	ABCC10
5.64e-05	3.05e-07	12.8521	7.44466	1.33029	AF165187.1	AGTRAP
5.66e-05	3.07e-07	-12.8429	7.4383	-1.57126	AY169244.1	RAB11FIP4
5.69e-05	3.12e-07	12.822	7.42388	1.47702	BC009702.1	DNAJC19
5.69e-05	3.12e-07	12.8214	7.42346	2.28061	NM_032344.2	NUDT22
5.69e-05	3.12e-07	12.8187	7.42159	1.90405	AK130145.1	BCKDK
5.79e-05	3.19e-07	12.787	7.39972	2.23294	AF029689.1	CRYZL1
5.82e-05	3.22e-07	12.775	7.39139	2.31488	AY359090.1	ZDHHC4
5.84e-05	3.24e-07	12.7654	7.38472	2.37291	AB026190.1	KLHL20
5.89e-05	3.28e-07	-12.7474	7.37225	-1.68024	AK126338.1	CDHR3
5.9e-05	3.3e-07	12.7391	7.36649	2.4811	AK298174.1	HAGH
5.93e-05	3.33e-07	12.7265	7.35772	2.23949	NM_024060.2	AHNAK
5.93e-05	3.35e-07	-12.7185	7.35213	-1.80518	NM_017493.5	OTUD4
5.93e-05	3.35e-07	-12.7179	7.35172	-1.77802	NM_053285.1	TEKT1
5.97e-05	3.4e-07	-12.6974	7.33745	-2.65506	AK301775.1	KCNIP1
5.97e-05	3.41e-07	-12.6926	7.33407	-1.64068	NM_205839.1	LST1
5.97e-05	3.41e-07	12.6921	7.33373	2.64645	NM_030572.2	SPX
6.05e-05	3.47e-07	-12.6681	7.31696	-2.2707	BC070199.1	LEAP2
6.08e-05	3.5e-07	-12.6551	7.30786	-1.57525	AK290916.1	LAT2
6.14e-05	3.55e-07	-12.6358	7.29433	-2.08337	AK130126.1	ST8SIA5
6.14e-05	3.56e-07	12.6307	7.29076	2.01364	AK294422.1	MAPK12
6.17e-05	3.58e-07	12.621	7.28393	1.98456	AI636871	C6orf47
6.2e-05	3.62e-07	12.6081	7.27489	2.37758	AI953503	SLC39A4
6.23e-05	3.65e-07	-12.5965	7.26671	-1.47889	AK300710.1	SGCA
6.24e-05	3.66e-07	-12.5895	7.26183	-3.15721	AW242315	PTGER3
6.24e-05	3.68e-07	12.5817	7.2563	1.71038	NM_004295.3	TRAF4
6.24e-05	3.69e-07	-12.579	7.25446	-1.60407	NM_003017.4	SRSF3
6.28e-05	3.73e-07	12.5649	7.24448	1.95465	AK302055.1	CHMP1A
6.31e-05	3.76e-07	12.5532	7.2362	1.78221	AK291110.1	ITFG2 /// LOC100507424
6.38e-05	3.81e-07	-12.5339	7.22256	-3.73549	NM_001528.2	HGFAC
6.38e-05	3.83e-07	12.5257	7.21677	2.97947	NM_006331.6	EMG1
6.38e-05	3.86e-07	12.5154	7.20947	2.5017	NM_032861.3	SERAC1
6.38e-05	3.86e-07	12.5137	7.20828	2.92502	BC111783.1	CTC1
6.38e-05	3.88e-07	-12.5099	7.20562	-1.61084	AK294363.1	ZFP36L1
6.38e-05	3.88e-07	-12.5089	7.20489	-2.23974	NM_001135823.1	SSPN
6.39e-05	3.89e-07	12.5032	7.20082	1.88543	AK297946.1	ZNF800
6.39e-05	3.91e-07	12.4981	7.19723	2.3557	U78165.1	RIT1
6.44e-05	3.96e-07	12.4785	7.1833	1.68508	AF447582.1	CSNK1A1
6.44e-05	3.97e-07	-12.4775	7.18262	-2.26962	NM_001012982.2	MSANTD1
6.5e-05	4.03e-07	-12.4555	7.16696	-1.59496	DB314024	METTL15
6.5e-05	4.03e-07	12.4541	7.166	2.13333	NM_001033678.2	TRPT1
6.55e-05	4.08e-07	-12.438	7.1545	-1.7881	BC032325.2	TMX3
6.55e-05	4.09e-07	12.4322	7.15037	2.39457	BX354000	MTERF4
6.55e-05	4.14e-07	12.4171	7.13959	2.15689	BC029280.1	DPYSL4
6.55e-05	4.14e-07	-12.4163	7.13903	-3.48627	NM_000923.3	LOC729966 /// PDE4C
6.55e-05	4.16e-07	12.4085	7.13345	1.71094	BC051874.1	CROT
6.55e-05	4.17e-07	12.4053	7.13116	1.80718	NM_139035.2	SMARCA1
6.55e-05	4.18e-07	-12.4038	7.13006	-1.55101	AK293911.1	DDX39A
6.55e-05	4.19e-07	12.4011	7.12815	2.65853	BG178284	MED22
6.55e-05	4.2e-07	12.3959	7.12443	1.45	NM_000447.2	PSEN2
6.55e-05	4.21e-07	12.3935	7.12268	1.77282	AK301233.1	EIF3C /// EIF3CL
6.55e-05	4.22e-07	-12.3904	7.12051	-1.64846	AW044243	CORO1A
6.55e-05	4.22e-07	12.3894	7.11976	2.1295	NM_001128613.1	NUDT22
6.55e-05	4.23e-07	12.3856	7.11707	1.91252	NM_001018073.1	PCK2
6.6e-05	4.29e-07	12.368	7.10443	3.12714	BI084780	MRPL12
6.6e-05	4.29e-07	12.3675	7.10409	2.86911	BG530481	CEP68
6.61e-05	4.31e-07	12.3609	7.09938	2.54203	BC010000.2	CHMP1A
6.61e-05	4.32e-07	-12.3563	7.09607	-2.33286	AK300079.1	NEB
6.65e-05	4.36e-07	12.3437	7.08698	2.50492	BC057220.1	AGL
6.74e-05	4.44e-07	12.3201	7.07003	1.42079	NM_018457.3	PRR13
6.76e-05	4.46e-07	12.3124	7.06446	1.6259	NM_020829.2	RIC1
6.76e-05	4.48e-07	12.3065	7.06023	1.75916	CB409373	ZNF480
6.76e-05	4.49e-07	12.3027	7.0575	3.01402	BQ014497	BBS12
6.81e-05	4.54e-07	12.2891	7.04767	2.46372	BX346240	ECD
6.81e-05	4.57e-07	12.2786	7.04007	1.8406	BC026058.2	STAG3L4
6.81e-05	4.58e-07	-12.2741	7.03685	-1.36829	NM_173855.3	MORN3
6.81e-05	4.59e-07	12.2733	7.03626	2.45825	NM_138720.1	HIST1H2BD
6.81e-05	4.59e-07	-12.2716	7.035	-1.74257	BC083496.1	RBM25
6.84e-05	4.63e-07	-12.2591	7.02598	-2.33165	DR432440	MSH4
6.84e-05	4.65e-07	12.2538	7.02213	1.65227	NM_015425.3	POLR1A
6.84e-05	4.65e-07	-12.2537	7.02209	-1.66555	NM_002409.4	MGAT3
6.84e-05	4.67e-07	-12.2482	7.01809	-2.4961	NM_133371.3	MYOZ3
6.84e-05	4.68e-07	12.2451	7.01583	2.50875	BX102271	DNAJC18
6.96e-05	4.78e-07	-12.217	6.99545	-2.62911	NM_001017402.1	LAMB3
7.04e-05	4.85e-07	12.1966	6.98065	2.18168	NM_020371.2	AVEN
7.09e-05	4.91e-07	12.18	6.96856	2.94328	EF177381.1	MALAT1
7.09e-05	4.91e-07	12.178	6.96706	1.33339	CR615612.1	TMEM222
7.15e-05	4.96e-07	-12.1639	6.95678	-1.97874	NM_004418.3	DUSP2
7.15e-05	4.98e-07	-12.1587	6.95301	-2.23826	BC069540.1	LIF
7.17e-05	5.01e-07	12.1508	6.94725	2.01932	NM_145177.2	DHRSX
7.27e-05	5.1e-07	-12.1279	6.93046	-1.62511	BC144040.1	FLT3
7.32e-05	5.15e-07	-12.1147	6.92083	-1.65608	NR_002992.2	RPL32 /// RPL32P3 /// SNORA7A /// SNORA7B
7.32e-05	5.17e-07	-12.1085	6.91629	-2.39432	NM_005353.2	ITGAD
7.32e-05	5.19e-07	-12.1035	6.91263	-1.53295	BX361742	RPS28
7.32e-05	5.19e-07	12.1016	6.91122	2.01969	AK098658.1	CCDC71
7.32e-05	5.2e-07	12.0997	6.90982	1.93314	NM_017859.2	UCKL1
7.48e-05	5.33e-07	-12.0651	6.88436	-1.43137	NM_032109.2	OTP
7.59e-05	5.42e-07	12.0426	6.86777	1.64859	NM_005451.3	PDLIM7
7.62e-05	5.46e-07	12.0325	6.86037	1.57878	AI655088	CFAP69
7.71e-05	5.57e-07	12.006	6.8408	1.68272	AK301602.1	UCKL1
7.71e-05	5.57e-07	-12.0055	6.8404	-2.26415	NM_153209.3	KIF19
7.71e-05	5.58e-07	-12.0047	6.83979	-2.48526	NM_174896.2	C1orf162
7.73e-05	5.61e-07	11.9975	6.83447	2.48994	NM_021133.2	RNASEL
7.73e-05	5.62e-07	-11.9946	6.83234	-2.97254	AK297167.1	RPL31
7.74e-05	5.64e-07	11.9887	6.82794	2.1872	BC013155.1	CRYZL1
7.75e-05	5.67e-07	11.9826	6.82341	2.4379	AB002390.1	ENTPD4
7.75e-05	5.7e-07	11.9757	6.81836	1.57147	NM_182639.1	HPS1
7.75e-05	5.7e-07	11.9751	6.81789	1.24887	AK294597.1	ACAD9
7.75e-05	5.72e-07	11.9704	6.81442	1.89009	BC058900.1	RABEP2
7.75e-05	5.73e-07	11.9681	6.81266	1.80929	AK309448.1	LIPC
7.83e-05	5.8e-07	-11.9507	6.79974	-1.81641	NM_001080504.2	RBM44
7.89e-05	5.87e-07	-11.9359	6.78877	-1.42838	AK300767.1	BCCIP
7.89e-05	5.88e-07	11.9325	6.78625	1.4202	AI400803	DUS3L
8e-05	5.98e-07	11.91	6.76943	2.17927	NM_001004105.2	GRK6
8.01e-05	6.01e-07	-11.904	6.76499	-1.36077	BC010946.1	TAGLN
8.04e-05	6.04e-07	11.8952	6.7584	1.67079	BC094745.1	INTS6
8.04e-05	6.06e-07	11.8927	6.75657	3.35729	AK310097.1	TAF12
8.15e-05	6.15e-07	-11.8708	6.74019	-2.34691	NM_001105578.1	SYCE2
8.17e-05	6.19e-07	11.8629	6.73423	1.33728	NM_032125.2	TMEM222
8.25e-05	6.27e-07	11.8458	6.72146	1.9566	CA413168	MAVS
8.57e-05	6.52e-07	11.7924	6.68126	1.96507	NM_001128225.1	SLC39A13
8.6e-05	6.59e-07	-11.7787	6.67096	-1.40873	BC025702.1	SGCA
8.6e-05	6.59e-07	11.7786	6.67087	1.25744	NM_020350.4	AGTRAP
8.6e-05	6.6e-07	-11.776	6.66891	-3.04798	NM_013347.3	RPA4
8.64e-05	6.65e-07	11.7671	6.66223	1.74003	AK290670.1	IL17RC
8.71e-05	6.75e-07	-11.7476	6.64742	-1.7627	AK295551.1	TMX3
8.71e-05	6.75e-07	-11.7472	6.64718	-2.16228	NM_001034837.1	KCNIP1
8.71e-05	6.75e-07	11.7459	6.64617	1.58546	AK297419.1	STX3
8.72e-05	6.8e-07	-11.7377	6.63994	-2.16077	DB305634	ANKRD34C
8.72e-05	6.8e-07	11.7373	6.63964	1.78269	AK130145.1	BCKDK
8.73e-05	6.83e-07	11.7308	6.63475	2.92763	NM_031305.2	ARHGAP24
8.73e-05	6.84e-07	11.7288	6.63323	2.85997	CR617594.1	PLPP1
8.8e-05	6.92e-07	-11.7136	6.62168	-1.43196	AK290916.1	LAT2
8.8e-05	6.93e-07	-11.7106	6.61945	-2.21078	NM_002430.2	MN1
8.88e-05	7.01e-07	11.6958	6.60819	1.55674	NM_018844.2	BCAP29
8.93e-05	7.07e-07	-11.6851	6.60002	-1.34703	BC126387.1	CORO1A
8.98e-05	7.13e-07	-11.673	6.59083	-2.0627	CD368744	UBE2L3
9.05e-05	7.22e-07	-11.6576	6.57911	-1.65144	BM681684	DNHD1
9.05e-05	7.22e-07	11.6571	6.57868	2.08083	AK298174.1	HAGH
9.05e-05	7.24e-07	-11.6532	6.5757	-2.11802	NM_001004056.1	GRK4
9.06e-05	7.27e-07	-11.6481	6.57188	-1.94385	NM_001145033.1	C11orf96
9.07e-05	7.29e-07	-11.6437	6.56847	-1.55422	NM_024036.4	LRFN4
9.08e-05	7.32e-07	11.6394	6.56523	1.89761	AF512007.1	AKIP1
9.09e-05	7.35e-07	11.633	6.56031	1.85944	NM_006742.2	PSKH1
9.09e-05	7.37e-07	-11.6304	6.55834	-1.63239	CR597943.1	ALB
9.09e-05	7.38e-07	11.6281	6.5566	1.45328	NM_020829.2	RIC1
9.12e-05	7.42e-07	11.6203	6.55063	1.70217	NM_001127392.1	MYRF
9.17e-05	7.48e-07	11.6093	6.54215	1.57573	BC157842.1	EIF3C /// EIF3CL
9.17e-05	7.53e-07	11.601	6.5358	1.88407	NM_032301.2	FBXW9
9.17e-05	7.53e-07	11.6005	6.53546	2.47375	AK122616.1	EFHB
9.17e-05	7.54e-07	11.6	6.53504	1.85807	NM_022773.2	LMF1
9.23e-05	7.62e-07	-11.5849	6.52346	-2.98142	AI276956	GART
9.23e-05	7.63e-07	-11.5845	6.5232	-2.98319	BC018370.1	FLRT1
9.27e-05	7.68e-07	11.5747	6.51562	1.94117	NM_001128613.1	NUDT22
9.32e-05	7.74e-07	11.5649	6.50814	2.38307	NM_032023.3	RASSF4
9.37e-05	7.81e-07	11.5531	6.49908	3.95426	NM_031477.4	YPEL3
9.37e-05	7.82e-07	11.552	6.49818	2.40464	BC031303.2	ANKRD39
9.47e-05	7.92e-07	11.5347	6.48491	4.0674	NM_001135733.1	TP53INP1
9.59e-05	8.05e-07	11.5136	6.46859	1.36107	NM_152736.4	ZSCAN26
9.59e-05	8.06e-07	-11.5114	6.46693	-2.15994	NM_013439.2	PILRA
9.6e-05	8.09e-07	11.5073	6.46374	1.69459	AY074907.1	TMEM199
9.62e-05	8.12e-07	-11.5016	6.4593	-1.35829	BC051192.1	SFPQ /// SFPQ
9.7e-05	8.21e-07	-11.4873	6.44824	-1.5479	BC002769.1	RTFDC1
9.71e-05	8.26e-07	11.4798	6.44242	1.28699	NM_032125.2	TMEM222
9.71e-05	8.26e-07	-11.4798	6.44242	-2.90868	NM_013351.1	TBX21
9.78e-05	8.34e-07	11.4669	6.43242	1.88431	NM_001003678.1	C11orf49
9.89e-05	8.47e-07	11.4472	6.41714	1.74637	NM_001018050.2	POLR3H
9.89e-05	8.49e-07	11.4443	6.4149	2.59977	AK056260.1	MAVS
9.89e-05	8.5e-07	-11.4425	6.41348	-1.38794	AK303917.1	ZFP36L1
[truncated: 48,948 more rows]

## Sheet: Table.S1D
GSE117890.top
[truncated: 19,746 more rows]

## Sheet: Table.S1E
GSE168845.top
[truncated: 58,193 more rows]

## Sheet: Table.S1F
Bulk-seq-DEGs
RAB25
MAL
CA2
[truncated: 1,300 more rows]

## Sheet: Table.S2A.ClusterMarkers
p_val	avg_log2FC	pct.1	pct.2	p_val_adj	cluster	gene
[truncated: 14,626 more rows]

[truncated: 15 more sheets: Table.S2B.diff_Subset.1, Table.S2C.diff_Subset.2, Table.S2D.diff_Subset.3, Table.S2E.scRNA-seq-DEGs, Table.S3A. GSE29609 data, Table.S3B.Tcga.ALL, Table.S3C.All Module., Table.S3D, Table.S3E, Table.S3F. UniCox, Table.S4A, Table.S4B, Table.S4C, Table.S4D, Table.S4E]
