# Supplementary material
Source: Research Square preprint supplement (doi:10.21203/rs.3.rs-6711579/v1)
Supplement: Supplementary file 3 [file bbaf7ad1ec3111d4363607b2.xlsx]

## Sheet: Table.S5A.GSE167573-group data
GSE167573-group data
geo_accession	group	OS status:ch1	os time (months):ch1	title
GSM5107730	TRCC	0	93.7	TFE3-1
GSM5107731	TRCC	0	104.8	TFE3-2
GSM5107732	TRCC	1	52.3333	TFE3-3
GSM5107733	TRCC	0	71.9	TFE3-4
GSM5107734	TRCC	1	10	TFE3-5
GSM5107735	TRCC	0	65.3	TFE3-6
GSM5107736	TRCC	0	89.4333	TFE3-7
GSM5107737	TRCC	1	20.9	TFE3-8
GSM5107738	TRCC	1	5	TFE3-9
GSM5107739	TRCC	0	85	TFE3-10
GSM5107740	TRCC	1	13	TFE3-11
GSM5107741	TRCC	0	51.1	TFE3-12
GSM5107742	TRCC	0	49.9	TFE3-13
GSM5107743	TRCC	1	58.5333	TFE3-14
GSM5107744	TRCC	0	48.9	TFE3-15
GSM5107745	TRCC	0	42.2	TFE3-16
GSM5107746	TRCC	0	65.8333	TFE3-17
GSM5107747	TRCC	0	64.4667	TFE3-18
GSM5107748	TRCC	1	47	TFE3-19
GSM5107749	TRCC	0	55.5	TFE3-20
GSM5107750	TRCC	0	52	TFE3-22
GSM5107751	TRCC	0	47.6333	TFE3-23
GSM5107752	TRCC	1	27	TFE3-24
GSM5107753	TRCC	0	45.9333	TFE3-27
GSM5107754	TRCC	0	44.3333	TFE3-28
GSM5107755	TRCC	0	40.9	TFE3-29
GSM5107756	TRCC	0	32.1667	TFE3-30
GSM5107757	TRCC	0	30.5333	TFE3-31
GSM5107758	TRCC	1	24	TFE3-32
GSM5107759	TRCC	0	29.1	TFE3-33
GSM5107760	TRCC	0	30.2	TFE3-34
GSM5107761	TRCC	0	11	TFE3-35
GSM5107762	TRCC	0	50.6786	TFE3-36
GSM5107763	TRCC	1	6	TFE3-37
GSM5107764	TRCC	0	5	TFE3-38
GSM5107765	TRCC	0	20	TFE3-40
GSM5107766	TRCC	0	20	TFE3-41
GSM5107767	TRCC	0	20	TFE3-42
GSM5107768	TRCC	0	19	TFE3-43
GSM5107769	TRCC	0	13	TFE3-44
GSM5107770	TRCC	0	12	TFE3-45
GSM5107771	TRCC	0	50	TFE3-46
GSM5107772	TRCC	-	-	TFE3-47
GSM5107773	TRCC	-	-	TFE3-48
GSM5107774	TRCC	0	8	TFE3-50
GSM5107775	TRCC	0	6	TFE3-51
GSM5107776	TRCC	0	6	TFE3-52
GSM5107777	TRCC	-	-	TFE3-53
GSM5107778	TRCC	0	5	TFE3-54
GSM5107779	TRCC	0	4	TFE3-55
GSM5107780	TRCC	0	2	TFE3-56
GSM5107781	TRCC	0	2	TFE3-57
GSM5107782	TRCC	0	44.6333	TFE3-58
GSM5107783	TRCC	-	-	TFE3-59
GSM5107784	TRCC	-	-	TFE3-60
GSM5107785	TRCC	0	24	TFE3-62
GSM5107786	TRCC	-	5.42857	TFE3-63
GSM5107787	TRCC	0	-	TFE3-64
GSM5107788	TRCC	0	29	TFE3-65
GSM5107790	TRCC	0	2	TFE3-67
GSM5107791	TRCC	0	28.8	TFE3-69
GSM5107792	TRCC	0	3.5	TFE3-70
GSM5107793	Control	NA	NA	TFE3-N-1
GSM5107796	Control	NA	NA	TFE3-N-19
GSM5107797	Control	NA	NA	TFE3-N-20
GSM5107799	Control	NA	NA	TFE3-N-31
GSM5107801	Control	NA	NA	TFE3-N-35
GSM5107802	Control	NA	NA	TFE3-N-36
GSM5107804	Control	NA	NA	TFE3-N-44
GSM5107805	Control	NA	NA	TFE3-N-46
GSM5107808	Control	NA	NA	TFE3-N-50
GSM5107809	Control	NA	NA	TFE3-N-51
GSM5107810	Control	NA	NA	TFE3-N-53
GSM5107812	Control	NA	NA	TFE3-N-59
GSM5107814	Control	NA	NA	TFE3-N-67
GSM5508078	Control	NA	NA	TFE3-N-26

## Sheet: Table.S5B.GSE167573-dataset
	GSM5107730	GSM5107731	GSM5107732	GSM5107733	GSM5107734	GSM5107735	GSM5107736	GSM5107737	GSM5107738	GSM5107739	GSM5107740	GSM5107741	GSM5107742	GSM5107743	GSM5107744	GSM5107745	GSM5107746	GSM5107747	GSM5107748	GSM5107749	GSM5107750	GSM5107751	GSM5107752	GSM5107753	GSM5107754	GSM5107755	GSM5107756	GSM5107757	GSM5107758	GSM5107759	GSM5107760	GSM5107761	GSM5107762	GSM5107763	GSM5107764	GSM5107765	GSM5107766	GSM5107767	GSM5107768	GSM5107769	GSM5107770	GSM5107771	GSM5107772	GSM5107773	GSM5107774	GSM5107775	GSM5107776	GSM5107777	GSM5107778
5S_rRNA	8.9641	37.814	3.7494	1.1121	11.2267	7.4531	2.8817	6.2529	0.9661	32.2542	12.1902	4.3688	3.4134	0	2.99	2.2479	0	3.0656	4.069	0	2.0915	4.4182	0	1.8375	0	2.5808	0.9132	1.2756	0	0	0	0	1.921	0.798	0	0	0	0	0	0	0	0.779	5.6255	0	0	0	0	0	0
7SK	15.3671	23.2701	3.7494	8.8972	5.6134	8.6953	2.8817	3.1264	0	3.5838	4.0634	2.1844	12.5158	5.278	4.9833	5.6197	9.231	4.5985	3.0517	0	2.0915	0.8836	12.1767	3.6751	3.8117	11.6136	3.6527	3.8267	3.2886	1.0825	4.5383	12.3645	0	2.3941	0	1.5534	0	6.2381	4.3409	3.9317	1.7991	0.779	4.6879	1.564	1.7462	2.3949	0.682	0	0
A1BG	32.0147	8.7263	22.4964	53.3831	19.6468	11.1797	5.7634	59.4024	31.8823	136.184	9.4813	61.1634	21.6182	23.7508	16.9434	16.859	27.6931	26.0579	23.3967	27.9117	9.4117	26.5089	30.91	39.5068	17.7879	3.8712	28.3084	26.7871	27.1306	17.3206	29.045	34.24	39.3811	25.5371	15.6482	10.0971	26.8188	19.6056	24.96	4.718	21.5891	8.5695	2.8127	14.0756	26.1935	87.8112	15.0045	14.5742	314.196
A1BG-AS1	107.57	40.7227	39.3688	82.2989	84.2004	26.0859	51.8709	99.004	98.5453	195.317	25.7349	89.5607	29.5828	67.2939	60.7968	41.5854	58.0237	57.4806	83.4144	66.6279	44.9672	60.0869	79.6166	79.9323	73.6929	20.6464	22.8294	34.4406	40.2849	31.3936	47.1981	67.5289	111.42	67.0349	20.5383	27.9611	64.5638	16.041	41.7809	24.3766	61.1692	34.278	4.6879	14.0756	26.1935	121.339	45.0136	22.2448	82.9952
A1CF	5.1224	104.716	14.0603	3.3364	39.2935	390.047	2.8817	16.6744	2.8984	10.7514	18.9626	38.2271	29.5828	120.073	77.7401	137.119	14.5059	104.998	13.2242	218.792	18.8235	21.2071	56.1999	63.3946	33.0348	507.127	131.497	553.601	258.152	81.1903	176.085	30.4356	3.8421	75.0153	97.8014	132.038	175.812	19.6056	232.237	66.839	12.5937	31.9409	42.1911	35.971	111.759	7.1846	166.414	3.0683	5.9282
A2M	4403.95	1218.77	4727.06	4186.12	2636.88	1445.91	939.44	6276.85	3888.67	3660.85	2259.25	2816.79	2281.29	3280.25	3725.55	3862.95	1881.81	2484.7	2890	1607.17	4233.19	6147.42	4311.47	10635.6	4387.27	2271.1	7091.72	5477.33	8967.09	7048.4	8409.43	8794.93	20765.4	12900.2	6607.47	6848.91	10931.2	1468.64	16125.8	4662.22	7776.59	6357.8	3845.95	1941.65	4954.93	12020.6	11210.4	1810.27	1161.93
A2M-AS1	81.9577	125.077	93.7351	52.2709	152.964	109.312	37.4623	48.9809	71.4936	195.317	69.0779	155.093	102.402	113.476	102.657	78.6751	145.059	51.3494	191.243	65.7275	174.64	87.4794	95.5399	117.602	82.5869	132.911	113.234	54.8499	96.1904	113.666	127.979	71.3334	55.7099	108.533	57.7028	73.7862	120.188	51.6875	72.7096	53.4712	70.1647	85.6951	139.699	83.6717	103.028	72.6438	67.5204	36.819	11.8565
A2ML1	17.9283	11.6351	40.3061	3.3364	22.4534	121.734	11.5269	10.4215	22.221	5.3757	6.7723	31.6739	61.4411	1.3195	6.9767	11.2393	0	3.0656	4.069	48.6204	97.2546	8.8363	4.6833	1.8375	2.5411	24.5176	1.8263	24.236	6.5771	7.5778	2.723	15.2178	8.6446	32.7194	58.6809	66.0192	8.9396	34.7554	4.8835	3.9317	15.2923	64.6608	0	7.8198	179.862	18.3605	4.0921	6.9036	5.9282
A2ML1-AS1	0	0	0	0	0	0	0	0	2.8984	0	0	0	0	0	0	0	0	0.7664	0	0	0	0	0.9367	0	0	0	0	0	0	0	0	0	0	0	0	0	0	0	0	0	0	0	0	0	0	0	0	0	0
A2ML1-AS2	0	0	0	1.1121	0	0	0	0	0	0	0	0	0	0	0	0	0	0	0	0	0	0	0	0	1.2706	0	0	0	0	0	0	0	0	0	0	0	0	0	0	0	0	0	0	0	0	0	0	0	0
A2MP1	11.5253	0	4.6868	13.3458	15.4367	2.4844	0	2.0843	5.7968	19.7109	1.3545	9.8298	1.1378	3.9585	5.98	1.1239	3.9562	6.1313	12.207	5.4023	2.0915	7.069	6.5567	5.5126	2.5411	10.3232	1.8263	6.3779	1.6443	5.4127	0.9077	1.9022	0.9605	4.7882	0.978	3.8835	4.9664	0	3.7983	0	2.6986	1.5581	0.9376	0.782	1.7462	5.588	2.7281	0	0
A3GALT2	0	0	0.9374	2.2243	1.4033	0	2.8817	2.0843	0.9661	3.5838	0	2.1844	1.1378	0	0.9967	1.1239	1.3187	1.5328	1.0172	5.4023	2.0915	2.6509	1.8733	0.9188	0	0	0	0	0	1.0825	0	0	0.9605	0	0	0.7767	0	2.6735	1.0852	3.1454	0	0	0	0.782	0	3.1931	0	0	0
A4GALT	491.746	546.848	403.998	658.391	202.081	192.539	2022.97	87.5404	218.345	186.357	154.409	112.497	519.974	381.332	456.474	597.931	702.878	645.316	432.331	508.713	398.43	637.981	543.266	305.948	316.371	212.916	325.09	201.541	270.484	353.99	305.88	461.289	144.077	123.695	291.448	296.698	628.753	646.094	486.72	342.845	305.846	204.11	255.022	315.919	120.49	672.953	391.482	190.999	586.895
A4GNT	58.9071	148.347	33.7446	2.2243	47.7136	11.1797	17.2903	2.0843	34.7807	12.5433	32.5072	9.8298	40.9607	11.8754	27.9067	12.3632	52.7488	46.7509	73.2419	16.2068	37.647	28.2762	20.6066	36.7505	15.2468	78.7143	21.003	44.6452	9.8657	25.9809	13.6148	29.4845	1.921	1.5961	21.5163	8.5437	38.7383	3.5647	3.2557	11.0088	1.7991	16.36	72.1936	12.5117	13.9699	5.588	24.5529	12.273	0
AA06	0	0	0	0	0	0	0	0	0	0	0	0	1.1378	0	0.9967	0	0	0	0	0	0	0	0	0	0	0	0	0	0	0	0	0	0	0.798	0	0	0.9933	0	0	0.7863	0	0	0	0	0	0	0	0	0
AAAS	261.24	250.154	341.196	295.831	429.422	325.453	403.44	496.062	363.265	376.298	295.274	328.753	287.863	288.968	346.841	356.286	243.963	408.496	259.398	408.771	315.816	288.064	282.873	373.018	383.712	379.377	231.946	359.713	248.286	298.781	210.576	285.334	315.049	257.765	237.657	347.96	271.168	335.078	272.932	273.647	206.896	283.573	148.137	301.062	405.126	313.726	293.27	289.95	248.986
AACS	475.099	491.581	461.177	395.924	481.346	279.492	458.193	653.426	414.47	487.396	595.966	431.421	278.761	365.498	383.717	456.316	369.242	400.832	432.331	447.487	338.823	378.194	467.396	286.654	642.907	287.759	420.06	299.761	390.517	434.098	287.727	445.12	289.115	549.846	428.37	347.96	303.947	448.255	281.071	428.556	329.234	275.782	423.786	365.966	678.411	334.481	302.819	406.543	326.053
AACSP1	11.5253	14.5438	10.3109	3.3364	2.8067	39.75	20.172	0	1.9323	17.919	12.1902	8.7376	6.8268	5.278	38.8701	8.9914	19.7808	59.7799	10.1725	6.3026	7.3202	11.4872	1.8733	26.6441	34.3053	34.8408	42.006	22.9604	14.7985	44.3841	1.8153	5.7067	0	4.7882	32.2745	11.6505	21.8524	2.6735	10.8522	66.839	4.4977	111.404	15.0013	116.515	26.1935	13.5708	12.2764	46.0238	0
AADAC	0	0	0.9374	0	0	0	0	33.3487	0.9661	0	1.3545	1.0922	0	0	0	0	0	0	0	0.9004	0	0	0	0.9188	0	0	0	0	2.4664	0	0	0.9511	0	2.3941	4.8901	0	0	0	0	0	3.5982	0	0	0	0	2.3949	0.682	0.7671	0
AADACL2	2.5612	0	0	0	2.8067	0	0	4.1686	6.7629	0	2.7089	2.1844	0	1.3195	0	1.1239	0	0	0	0.9004	1.0457	0	0.9367	0.9188	1.2706	0	0.9132	0	0	0	0	0	0	0	2.934	0	0	0.8912	0	1.5727	0	1.5581	0.9376	2.3459	0	0	2.7281	0	0
AADACL2-AS1	0	0	0	0	0	0	0	1.0421	0.9661	0	0	0	0	0	0	0	0	0	0	0	1.0457	0.8836	0	0	0	0	0	0	0	0	0	0	0	0	0	0	0	0	0	0	0	0	0	0	0.8731	0	0	0	0
AADACL3	0	0	0	0	0	0	0	1.0421	0	1.7919	0	0	0	0	0	0	0	0	0	0	0	0.8836	0	0	0	0	0	0	0.8221	0	0	0	0	0	0	0	0	0	0	0	0	0.779	0	0	0	0	0	0	0
AADACL4	2.5612	0	0	0	0	0	0	0	0	3.5838	6.7723	2.1844	1.1378	1.3195	1.9933	5.6197	0	1.5328	2.0345	1.8008	0	0.8836	0	11.9439	2.5411	5.1616	3.6527	11.4802	0	6.4952	0.9077	3.8044	1.921	3.9902	0	0.7767	0	0	4.3409	1.5727	4.4977	0	1.8752	0	4.3656	2.3949	2.7281	0	0
AADACP1	1.2806	0	0.9374	0	0	0	0	180.291	1.9323	1.7919	2.7089	1.0922	0	1.3195	0.9967	0	1.3187	0	1.0172	2.7011	0	1.7673	0.9367	2.7563	0	2.5808	0	2.5512	0.8221	0	4.5383	0	4.8026	0	0.978	0	0	0	2.1704	0	0	1.5581	0.9376	0	0.8731	0	1.364	0	0
AADAT	48.6624	26.1789	33.7446	37.813	42.1002	64.5938	23.0537	20.8429	60.8662	28.6704	54.1787	34.9505	39.8229	42.2236	72.7568	49.4529	36.9242	62.8455	37.6382	68.4286	52.2874	41.5306	39.34	32.1567	22.8702	50.3255	46.5719	36.9918	43.5734	38.9714	50.8287	50.4089	42.2627	45.488	40.0986	41.1649	35.7584	45.4494	30.3861	45.6078	44.0778	51.4171	45.9414	84.4537	39.2902	37.5193	52.5158	39.8873	29.6412
AAED1	78.116	37.814	83.4243	96.7568	77.1837	37.2656	63.3978	86.4982	76.3243	66.3002	79.9136	81.9153	101.264	75.2108	62.7901	88.7905	105.498	62.8455	70.1902	27.9117	84.7057	66.2723	79.6166	61.5571	78.7752	61.9391	63.9222	62.5033	149.63	98.511	158.84	67.5289	73.9597	94.1681	108.56	105.631	69.5303	79.3136	74.88	73.1298	124.138	155.809	140.637	40.6629	93.4234	64.661	74.3406	113.525	94.8517
AAGAB	336.795	276.333	264.333	293.607	304.525	247.195	135.441	293.885	276.313	173.814	283.084	267.59	238.938	294.246	241.194	240.521	245.282	212.295	249.226	99.0415	299.084	235.046	251.026	192.94	306.207	298.082	353.399	205.368	313.236	335.587	229.637	264.409	374.601	304.051	226.899	246.213	207.598	205.859	188.285	217.817	203.298	254.748	397.534	365.966	401.633	133.313	258.487	238.557	65.2105
AAK1	3137.44	2716.79	2165.28	2080.83	2551.27	2312.95	1760.73	3911.18	3424.93	2594.67	3375.33	3475.39	2209.6	2219.38	2479.71	2957.06	3296.8	2257.07	2203.36	1806.16	2482.61	1985.52	2084.08	2949.23	2152.34	3191.16	2582.46	2607.28	1878.59	2667.37	2477.9	2233.21	2175.57	2111.6	2097.84	1860.19	1853.48	2029.18	2067.88	1505.84	2574.5	1887.63	2541.78	2546.9	2295.42	1808.91	1671.64	1857.83	1553.2
AAMDC	11.5253	23.2701	29.0579	26.6915	29.4701	19.875	14.4086	33.3487	22.221	59.1326	39.2796	30.5817	34.1339	19.7923	31.8934	31.47	15.8246	26.0579	20.345	18.0075	46.013	40.647	16.86	29.4004	10.1645	24.5176	52.9641	51.0231	36.9963	44.3841	28.1373	29.4845	52.8283	61.4487	56.7248	35.7281	19.8658	64.1638	51.0052	40.1034	22.4887	45.1847	39.3783	48.4827	61.1181	44.7039	67.5204	136.537	35.5694
AAMP	218.981	287.968	449.929	431.513	565.546	214.899	469.72	325.15	394.181	473.061	346.744	334.214	410.745	320.636	268.104	357.41	175.39	415.393	351.968	382.66	313.725	401.168	340.01	246.228	235.055	180.656	406.363	274.249	485.063	403.787	269.574	327.182	386.127	567.403	462.601	417.863	378.443	681.74	496.487	464.728	295.951	440.161	619.74	552.077	537.839	546.824	521.066	621.321	758.813
AANAT	8.9641	2.9088	10.3109	12.2336	7.0167	1.2422	20.172	7.295	4.8307	16.1271	4.0634	14.1987	11.378	2.639	15.9467	1.1239	7.9123	4.5985	9.1552	1.8008	5.2287	9.7199	6.5567	3.6751	1.2706	2.5808	6.3922	2.5512	4.9328	3.2476	0.9077	3.8044	0	3.9902	3.9121	3.1068	0.9933	1.7823	3.7983	2.359	0	3.8952	0.9376	3.1279	4.3656	4.7897	3.4101	0.7671	11.8565
AAR2	139.584	255.971	246.523	241.336	223.131	191.297	299.699	327.234	219.311	258.033	255.994	169.292	191.15	240.147	188.37	275.363	159.565	213.061	195.312	171.972	226.928	253.602	232.293	171.809	179.15	121.297	155.24	182.408	241.709	231.663	180.623	223.511	284.312	270.534	261.13	206.601	258.255	216.553	259.367	224.894	267.166	297.596	319.714	252.579	295.113	213.94	220.976	375.094	124.493
AARD	1.2806	5.8175	0.9374	1.1121	1.4033	38.5078	0	0	0	1.7919	18.9626	1.0922	18.2048	1.3195	7.9733	0	2.6374	8.4305	5.0862	18.9079	5.2287	0.8836	0	11.0252	0	9.0328	15.524	12.7558	1.6443	5.4127	1.8153	7.6089	1.921	12.7686	18.5823	24.8543	1.9866	24.0614	5.4261	5.5044	0.8995	6.2324	1.8752	36.753	10.4774	2.3949	1.364	58.2968	0
AARS	335.514	538.122	718.948	500.466	554.319	730.407	576.344	1611.16	655.036	426.472	870.923	522.073	993.298	537.032	573.084	620.41	423.309	544.15	712.074	519.518	1076.08	572.593	485.193	510.832	574.297	289.049	716.842	646.718	1235.68	780.51	984.806	775.156	852.938	1055	1446.48	1128.54	669.477	1120.19	799.263	1100.09	725.935	1105.47	1054.78	1034.56	930.742	799.082	791.83	2799.78	853.665
AARS2	206.175	209.431	327.136	216.869	211.904	301.852	440.903	267.832	267.618	580.575	147.637	294.895	308.343	263.898	256.144	251.76	192.533	357.146	269.571	394.365	357.646	283.646	216.37	185.59	273.172	166.461	224.641	187.51	240.065	207.847	176.085	273.92	246.852	252.179	235.702	250.096	236.403	500.834	207.277	210.739	204.197	190.866	151.888	362.056	259.315	391.159	239.39	395.804	320.124
AARSD1	108.85	69.8104	132.167	84.5232	94.0238	115.523	72.0429	63.571	86.9517	69.884	107.003	91.7451	126.296	121.393	87.7068	96.658	67.2547	114.195	71.2074	59.4249	124.444	82.1777	94.6032	90.0387	104.187	82.5855	112.32	105.873	116.744	96.3459	62.6282	91.3067	115.262	100.552	111.494	177.864	77.4766	229.92	103.638	95.1473	80.9592	144.124	88.1325	100.093	115.251	130.919	132.313	92.8146	100.78
AARSP1	0	0	0	0	0	0	0	0	0	0	0	0	0	0	0	0	0	0	0	0	0	0	0	0	0	0	0	0	0	0	0	0	0	0	0	0	0	0	0	0	0	0	0	0	0	0	0	0	0
AASDH	105.008	232.701	119.044	140.131	119.284	226.078	48.9892	105.257	187.429	82.4273	177.435	126.696	155.878	157.019	169.434	166.342	138.466	170.143	126.139	111.647	180.915	124.592	117.083	180.996	166.444	254.208	158.892	147.967	138.12	158.05	169.732	193.076	142.156	138.858	198.537	165.436	158.926	140.804	134.567	115.592	128.635	143.345	150.95	190.803	153.668	65.4593	160.276	234.721	41.4976
AASDHPPT	238.19	354.869	262.458	155.701	239.971	300.61	60.5161	187.587	203.853	132.6	329.136	203.15	311.757	233.549	276.077	194.44	261.107	167.077	260.416	86.4362	305.359	245.649	193.89	227.853	250.302	375.506	315.959	276.8	272.128	329.091	323.125	309.111	277.589	310.435	242.548	358.057	281.101	188.036	207.277	340.486	329.234	440.94	933.829	186.111	348.373	84.6181	250.303	440.294	65.2105
AASS	825.98	468.311	385.251	420.392	491.169	433.524	242.064	305.349	637.646	320.75	514.698	424.867	193.426	477.655	636.871	618.162	536.719	363.278	457.762	412.373	446.535	611.472	487.066	761.654	473.922	948.443	739.672	702.844	410.248	562.92	481.057	400.418	363.075	477.225	396.096	330.096	517.504	229.92	627.256	444.283	447.974	317.851	557.86	378.478	777.946	251.459	671.793	400.407	118.565
AATBC	294.536	773.732	673.956	95.6446	144.544	132.914	3688.6	1471.51	2915.78	3560.5	533.66	2114.51	188.875	116.115	178.404	49.4529	87.0355	104.998	270.588	628.463	195.555	76.8759	122.703	62.4759	68.6107	85.1663	109.581	49.7475	68.2377	46.5491	560.931	71.3334	893.279	811.601	63.5709	257.087	276.135	551.63	53.7183	375.871	970.611	52.1961	31.8777	85.2357	213.04	143.691	164.368	1220.4	124.493
AATF	113.972	145.438	302.764	189.065	172.611	188.813	198.839	229.272	201.921	211.444	258.703	204.242	201.39	141.185	180.397	162.97	109.454	210.762	194.294	267.412	257.254	198.817	181.713	149.758	134.68	135.492	259.342	178.581	296.793	232.746	160.655	194.027	212.274	279.312	274.822	399.222	124.161	284.281	259.367	364.076	158.32	215.796	214.706	276.82	401.633	335.279	272.81	344.411	397.191
AATK	461.012	98.898	58.1158	467.102	708.687	160.242	631.096	240.736	624.12	123.641	315.591	164.923	60.3033	385.291	131.56	211.299	92.3104	198.5	77.3109	329.538	38.6927	253.602	327.833	63.3946	85.128	100.651	113.234	137.762	215.401	110.419	75.3354	97.9645	99.8936	237.016	53.7908	56.6989	84.4296	65.9461	161.155	75.4888	256.371	45.1847	15.0013	14.8576	68.9762	335.279	57.29	56.7627	414.976
AATK-AS1	0	0	1.8747	0	0	0	0	6.2529	1.9323	0	0	2.1844	1.1378	2.639	2.99	0	1.3187	0.7664	1.0172	1.8008	1.0457	0.8836	4.6833	1.8375	0	1.2904	1.8263	0	4.1107	0	0	0	0	0	0	0	0.9933	0	0	0	0	1.5581	0	0	3.4925	0.7983	0	0	5.9282
AB015752.3	0	11.6351	2.8121	0	1.4033	0	0	0	0	0	0	2.1844	3.4134	1.3195	0.9967	1.1239	1.3187	0.7664	0	1.8008	0	0	0	0.9188	0	0	0.9132	1.2756	0	1.0825	0	0	0.9605	0	0	0.7767	0.9933	0.8912	0	0.7863	0.8995	0	1.8752	0	2.6193	0.7983	0	0	0
AB019438.66	0	0	0	0	0	0	0	0	0	0	0	0	0	0	0	0	0	0	0	0	0	0	0	0	0	0	0	0	0	0	0	0	0	0	0	0	0	0	0	0	0	0	0	0	0	0	0	0	0
AB019440.50	0	0	0	0	0	0	0	0	0	0	0	0	0	0	0	0	0	0	0	0	0	0	0	0	0	0	0	2.5512	0	0	0	0	0	0	0	0	0	0	0	0	0	0	0	0	0	0	0	0	0
AB019441.29	52.5042	61.0841	103.109	37.813	29.4701	47.2031	72.0429	66.6974	16.4242	43.0055	54.1787	32.7661	42.0985	27.7092	30.8967	29.2222	55.3862	26.8243	68.1557	13.5057	41.83	37.1125	19.67	33.0755	25.4114	18.0656	43.8324	31.8895	18.0871	24.8984	15.4301	19.0222	44.1837	43.0939	37.1645	29.5145	8.9396	32.9731	35.8122	28.3083	19.79	37.3942	82.507	17.9855	29.6859	27.9399	23.1888	51.3932	17.7847
ABALON	94.7636	95.9893	55.3037	81.1867	46.3102	59.625	106.624	102.13	66.663	46.5893	85.3315	88.4685	68.2679	62.0159	107.64	101.154	80.4419	81.2393	84.4316	81.9343	83.6599	91.8976	66.5033	38.588	34.3053	63.2295	41.0929	40.8185	59.1941	40.0539	35.3986	57.0667	36.4996	55.0644	44.0106	69.9027	62.5773	90.8987	51.0052	95.1473	55.7719	45.9637	77.8191	48.4827	30.5591	33.5279	65.4743	79.0075	349.766
ABAT	270.204	1070.43	396.5	329.195	241.375	168.938	651.268	63.571	353.604	301.039	155.764	396.47	276.485	508.003	583.051	953.093	286.162	563.31	919.593	623.061	506.142	733.414	284.746	252.66	87.6692	1174.26	805.42	1181.19	229.377	964.541	661.681	244.436	89.3279	271.332	152.57	264.854	911.84	1099.7	967.472	485.959	452.472	578.052	1093.22	433.216	908.041	125.331	884.585	161.083	278.627
ABC12-47043100G14.2	0	0	0	0	0	0	0	0	0	0	0	0	0	0	0	0	0	0	0	0	0	0	0	0	0	0	0	0	0	0	0	0	0	0	0	0	0	0	0	0	0	0	0	0	0	0	0	0	0
ABC12-47964100C23.1	2.5612	0	0	0	4.21	8.6953	0	0	0	0	0	0	0	0	0	0	0	0	11.1897	0	3.1372	5.3018	3.7467	0	0	0	0	10.2046	0	0	0	4.7556	2.8815	0	0	0	0	11.5851	0	0	0	0	0	0	1.7462	0	9.5483	0	17.7847
ABC14-1080714F14.1	0	8.7263	0	0	0	0	0	0	0	0	0	0	0	0	0	0	0	0	0	0	0	0	0	0	0	0	0	0	0	0	0	0	0	0	0	0	0	0	0	0	0	0	0	0	0	0	0.682	0	0
ABC7-42391500H16.2	0	0	0	0	0	0	0	0	0	0	0	0	0	0	0	0	0	0	0	0	0	0	0	0	0	0	0	0	0	0	0	0	0	0	0	0	0	0	0	0	0	0	0	0	0	0	0	0	0
ABC7-42418200C9.1	0	0	0	0	0	0	0	0	0	0	0	1.0922	1.1378	0	0	0	0	0	1.0172	0	0	0	0	0	0	0	0	0	0	0	0	0	0.9605	0	0	0.7767	0	0	0	0	0	0	0	0	0	0	0	0	0
ABC7-43041300I9.1	0	0	0	0	0	2.4844	0	0	1.9323	0	0	0	0	3.9585	0	0	0	0	0	0	6.2745	4.4182	0	2.7563	1.2706	2.5808	0	3.8267	0	0	4.5383	0	0	0	0	0	0	0	0	0	0	0	0	0	3.4925	0	4.7742	8.4377	0
ABC7-481722F1.1	2.5612	0	0	0	0	0	0	0	0	0	0	0	0	0	0	0	0	0	0	0	0	0	0	0	0	0	0	0	0	0	0	0	0	0	0	0	0	0	0	0	0	0	0	0	0	0	0	0	0
ABCA1	1623.79	2361.92	3097.95	1087.68	2019.41	1029.77	2273.68	3559.97	1305.24	1594.79	1827.18	2613.64	1724.9	1694.22	2199.65	1839.87	1247.51	1155.74	3110.75	1665.7	2387.44	2492.72	1360.98	1146.62	747.094	1022	2242.76	724.528	3377.35	1774.28	2342.66	1661.59	1721.24	3995.76	1926.69	2395.33	2225.96	1231.59	1319.08	1334.42	1582.3	2057.46	3611.56	1383.32	3060.27	1629.3	1950.59	2179.99	1084.87
ABCA10	38.4177	11.6351	70.3014	53.3831	67.3603	156.516	23.0537	58.3602	74.392	66.3002	51.4698	105.944	84.1971	81.8083	116.61	209.051	61.9798	91.2026	73.2419	216.991	90.9802	228.86	115.21	263.685	188.044	281.307	147.021	275.525	25.4864	66.0348	75.3354	128.4	117.183	64.6408	69.439	50.4853	127.141	81.9871	254.484	114.806	53.0733	104.392	45.0038	39.0989	69.8493	172.429	163.004	41.4214	219.345
ABCA11P	39.6983	107.624	59.0531	63.3924	53.3269	126.703	40.344	30.2223	130.428	60.9245	59.5966	75.3621	63.7167	76.5303	85.7135	69.6837	94.9478	52.8822	51.8797	31.5132	79.4769	76.8759	73.9966	81.7699	99.1043	150.977	72.1408	91.8416	55.9056	77.9427	68.9818	88.4534	96.0515	47.0841	59.6589	69.9027	73.5035	44.5582	48.8348	66.839	86.3565	59.2075	62.8178	84.4537	65.4837	15.1674	98.2114	83.6099	0
ABCA12	49.943	34.9052	67.4893	34.4766	64.5537	63.3516	106.624	6.2529	30.9162	14.3352	139.51	21.8441	65.9923	282.37	26.9101	484.414	292.756	119.56	234.984	26.1109	459.084	155.519	88.0466	41.3443	121.975	30.9696	128.758	7.6535	555.767	319.349	298.619	167.396	5.7631	326.396	168.219	372.038	67.5437	143.477	59.1444	144.687	340.029	109.846	619.74	305.754	48.8945	27.1417	54.5619	159.549	11.8565
ABCA13	151.11	5.8175	16.8723	202.411	18.2434	32.2969	63.3978	61.4867	21.2549	14.3352	3115.28	27.3051	12.5158	118.754	70.7635	55.0726	71.2109	104.231	10.1725	8.1034	42.8757	96.3158	152.677	16.5377	310.019	15.4848	52.051	59.9522	68.2377	187.279	48.1057	417.538	68.1966	92.572	34.2305	31.0679	65.5571	3.5647	24.96	114.019	28.7855	27.2666	38.4408	487.173	697.62	50.2919	109.124	29.1484	35.5694
ABCA17P	10.2447	0	6.5615	5.5607	16.8401	17.3906	14.4086	7.295	13.5258	1.7919	12.1902	2.1844	9.1024	9.2364	2.99	2.2479	6.5936	6.1313	1.0172	1.8008	0	14.1381	9.3667	11.9439	7.6234	18.0656	8.2186	15.3069	6.5771	9.7428	35.3986	7.6089	3.8421	4.7882	7.8241	6.2136	3.9732	6.2381	8.6817	8.6498	8.9955	38.1733	6.5631	65.6862	7.858	16.764	10.9124	6.1365	41.4976
ABCA2	764.512	773.732	674.893	1426.88	1493.15	551.532	2708.81	308.476	1180.61	981.96	598.675	938.203	515.423	814.124	1109.29	983.439	734.527	1731.32	896.196	2620.1	768.625	1276.85	1711.29	875.581	1773.71	562.614	931.438	872.495	644.558	1234.09	892.225	1118.51	788.583	777.286	595.611	650.095	1507.81	1649.54	1551.32	805.214	1044.37	458.079	645.054	839.063	1243.32	1954.2	1173.08	494.756	1997.81
ABCA3	188.247	139.621	348.695	638.372	590.806	244.711	1046.06	132.353	402.876	388.842	170.663	278.512	472.186	431.473	383.717	443.952	452.321	472.108	266.519	363.752	386.927	366.707	491.749	305.948	254.113	166.461	361.617	215.573	175.938	349.66	334.925	256.8	199.787	264.948	389.25	257.087	366.524	1232.48	356.494	279.151	340.029	487.683	186.578	765.557	325.672	387.966	285.768	451.033	456.474
ABCA4	52.5042	0	14.0603	14.4579	1.4033	11.1797	0	53.1495	16.4242	8.9595	9.4813	17.4753	21.6182	14.5144	67.7735	26.9743	21.0995	53.6486	21.3622	37.8158	1.0457	41.5306	21.5433	49.6132	20.3291	20.6464	39.2665	28.0627	18.0871	64.9523	22.6914	34.24	0.9605	15.9607	8.8021	6.2136	26.8188	2.6735	42.8661	186.363	26.9864	7.7905	21.5643	31.2791	14.843	11.9743	99.5755	7.6706	41.4976
ABCA5	586.51	974.436	633.649	491.569	630.1	1045.92	149.849	366.836	823.143	587.742	777.465	741.606	633.754	432.792	554.148	826.089	986.403	592.434	636.798	383.561	847.057	457.721	801.786	859.043	1175.28	1860.75	674.836	955.408	584.542	575.91	562.746	850.294	601.283	446.899	632.775	655.532	618.82	633.618	565.941	581.893	573.911	662.968	896.326	419.923	371.947	195.58	533.343	902.066	124.493
ABCA6	171.599	78.5367	462.114	72.2896	207.694	308.063	123.914	185.502	170.039	177.398	176.081	332.03	220.733	345.706	393.684	479.918	245.282	163.245	360.106	243.102	184.052	477.161	214.496	871.906	349.406	829.726	378.054	582.939	184.982	270.635	307.695	369.031	507.152	237.814	177.021	178.64	362.551	139.022	562.143	323.186	285.156	317.072	149.075	87.5816	127.475	379.185	375.795	27.6143	17.7847
ABCA7	455.89	151.256	523.979	626.139	600.63	147.82	1386.11	467.924	274.381	845.776	162.536	406.3	343.615	410.361	358.801	387.756	457.596	586.302	609.332	1176.79	373.332	499.251	842.062	262.766	384.982	140.654	310.479	154.345	334.611	328.009	334.925	438.462	382.285	221.854	257.218	399.999	352.618	599.753	390.678	150.191	349.024	152.693	74.0688	219.736	256.696	1183.06	272.81	158.782	1304.21
ABCA8	142.145	753.37	641.148	40.0373	450.472	699.352	190.193	270.958	652.138	376.298	295.274	666.244	310.619	233.549	732.551	813.726	440.452	295.067	426.227	469.997	684.966	829.729	532.963	1335.88	498.062	1127.81	747.89	965.613	165.25	602.974	629.005	517.405	632.98	262.553	495.853	184.077	740.994	558.76	1036.38	242.98	738.528	244.621	139.699	511.414	722.94	430.275	804.106	27.6143	130.421
ABCA9	87.0801	8.7263	150.914	25.5794	102.444	122.977	43.2258	72.9503	82.1211	114.681	120.548	91.7451	92.1617	112.156	174.417	180.953	77.8045	78.9401	149.536	185.478	90.9802	244.766	140.5	351.886	179.15	326.471	188.114	241.084	58.372	89.8507	109.826	126.498	308.325	128.484	73.3511	48.1552	158.926	51.6875	230.066	165.132	104.347	151.914	81.5694	26.5873	42.7827	254.653	155.501	5.3694	59.2823
ABCA9-AS1	3.8418	14.5438	4.6868	2.2243	12.6301	11.1797	0	4.1686	1.9323	1.7919	1.3545	13.1064	5.689	5.278	5.98	10.1154	6.5936	1.5328	6.1035	1.8008	6.2745	7.069	5.62	16.5377	6.3528	25.808	6.3922	7.6535	2.4664	1.0825	4.5383	5.7067	8.6446	7.1823	0.978	2.3301	11.9195	6.2381	7.5965	3.9317	6.2968	1.5581	2.8127	3.1279	2.6193	2.3949	4.0921	0.7671	0
ABCB1	340.637	689.377	554.912	127.897	263.828	72.0469	694.494	35.433	128.495	134.392	138.156	97.2061	87.6105	1409.21	540.194	1424.02	185.94	328.023	685.626	109.846	417.254	1565.79	278.19	183.752	123.245	287.759	500.42	321.446	2941.62	465.491	1964.17	598.249	32.6575	63.0448	224.943	309.902	1588.27	207.641	639.193	1530.22	679.158	710.49	913.202	789.016	262.808	90.2061	819.111	2038.09	88.9235
ABCB10	115.253	113.442	186.533	127.897	130.511	155.274	187.312	138.606	102.41	103.93	173.372	111.405	194.564	147.783	125.58	137.119	135.828	158.647	165.811	123.352	108.758	136.079	183.587	148.839	156.28	100.651	163.458	163.274	239.243	154.803	204.222	154.08	116.222	172.375	204.405	190.291	136.081	158.627	121.002	201.303	156.521	209.564	195.017	373.004	144.937	182.807	120.036	266.938	557.254
ABCB10P1	0	0	0	17.7944	0	2.4844	0	0	0	5.3757	0	0	0	0	0.9967	0	0	0	4.069	0	1.0457	0	0	0	0	0	0	0	0.8221	0	0	0	0.9605	1.5961	0	0	0.9933	0	0	0	0.8995	0	0	0	0.8731	0	0	3.0683	0
ABCB10P3	0	0	0.9374	11.1215	1.4033	2.4844	0	0	2.8984	3.5838	4.0634	1.0922	2.2756	0	0	0	1.3187	0.7664	0	8.1034	0	1.7673	0	0	0	0	0	0	0.8221	0	0.9077	0	0	0	0	0	0	1.7823	2.1704	0.7863	0.8995	0	0.9376	0	0	0	0.682	0	0
ABCB10P4	3.8418	0	0	0	0	0	0	0	0	0	0	0	0	6.5974	0	0	0	1.5328	0	0	0	0	0	0	0	0	0	0	0	1.0825	0	0	0	0	0	0.7767	0	0	0	0	0	0	0	0	0	0	0	3.0683	0
ABCB11	0	0	0.9374	2.2243	8.42	3.7266	2.8817	3.1264	0.9661	12.5433	0	0	1.1378	1.3195	0.9967	2.2479	1.3187	4.5985	8.138	7.203	5.2287	2.6509	0.9367	2.7563	1.2706	2.5808	1.8263	1.2756	0.8221	0	0.9077	0	1.921	0.798	0.978	0.7767	0	0	1.6278	0	0	0.779	3.7503	1.564	0.8731	3.9914	0.682	0	17.7847
ABCB4	34.5759	17.4526	48.7423	54.4952	159.981	4.9688	43.2258	69.8239	176.802	23.2947	107.003	8.7376	10.2402	151.741	47.8401	53.9487	96.2666	39.0868	68.1557	16.2068	38.6927	86.5958	73.9966	25.7254	97.8337	25.808	44.7456	28.0627	284.461	19.4857	147.948	85.6	13.4472	50.2762	24.4504	19.4174	51.6511	12.4763	27.1304	47.9668	98.0506	45.9637	35.628	197.059	15.7161	11.9743	28.645	29.9155	0
ABCB5	17.9283	334.508	40.3061	2.2243	8.42	18232.8	8.6452	3119.15	10.6274	1361.84	264.121	3111.69	12519.2	13.1949	1199.99	17.9829	4341.23	3027.31	138.346	2604.79	6622.73	9.7199	1.8733	527.37	1656.82	2886.62	851.992	334.202	6.5771	1868.46	3.6306	1267.83	1555.07	551.442	4842.15	4726.2	26.8188	7500.04	92.2435	158.055	905.844	438.603	53.442	216.608	3155.44	1010.63	63.4282	778.569	800.311
ABCB6	94.7636	20.3614	142.477	64.5045	64.5537	109.312	201.72	41.6859	129.461	66.3002	162.536	75.3621	292.414	162.297	46.8434	41.5854	210.995	138.72	96.6386	147.662	72.1567	122.825	77.7432	69.826	59.7167	65.8103	145.195	102.046	203.069	146.143	90.7655	104.622	70.1176	158.011	259.174	267.184	89.3961	565.889	121.002	60.5483	144.827	446.394	67.5057	179.073	71.5955	182.807	88.6631	115.059	41.4976
ABCB7	107.57	95.9893	179.971	117.888	145.947	187.57	86.4515	174.039	211.583	129.017	262.767	159.462	202.528	121.393	144.517	180.953	110.772	148.683	146.484	81.9343	220.653	160.821	113.337	148.839	221.079	163.881	210.03	227.053	186.626	191.609	179.716	172.151	208.432	239.41	188.757	196.504	163.893	157.736	138.908	133.678	182.608	196.32	131.261	172.035	286.382	87.013	185.511	218.613	77.067
ABCB8	453.329	750.462	508.982	611.681	689.04	530.414	985.548	782.652	614.459	541.153	398.214	494.768	589.38	542.309	452.488	509.14	462.871	577.872	489.297	932.79	393.202	470.975	638.806	436.412	365.923	398.733	375.315	363.54	309.947	346.412	323.125	350.009	409.18	307.243	410.766	408.543	416.188	679.958	424.32	336.554	400.298	324.083	275.648	412.103	446.162	660.181	326.689	402.708	580.967
ABCB9	302.219	927.896	813.621	306.953	1575.95	114.281	956.73	448.123	950.672	600.286	502.508	462.002	96.7128	87.0862	135.547	387.756	105.498	166.311	534.056	207.987	345.097	376.427	602.276	132.302	106.728	117.426	109.581	146.691	319.813	96.3459	83.5043	222.56	195.945	314.426	89.9773	61.3591	478.766	139.913	107.979	200.517	195.202	48.3009	514.731	128.244	492.437	181.21	246.893	325.235	391.263
ABCC1	1237.05	1306.04	1450.08	956.446	1314.93	1402.43	1510.02	724.292	1121.68	940.746	1059.19	691.365	2010.49	1195.46	1094.34	1137.42	1082.67	1012.43	1358.03	1508.13	972.547	1084.21	1097.77	1042.8	560.32	691.654	838.294	593.144	1399.28	758.859	915.824	907.361	847.174	799.631	1184.38	1464.07	1036	2036.31	923.52	810.718	1111.84	3197.99	1135.41	1050.2	679.284	1498.38	936.419	1422.13	663.962
ABCC10	435.401	477.038	433.056	601.672	582.386	383.836	971.139	350.161	512.049	713.175	241.095	432.513	469.911	481.613	502.321	536.115	487.926	568.675	505.573	646.471	357.646	473.626	614.453	392.312	406.582	366.473	334.222	278.076	429.979	378.888	332.202	445.12	352.509	276.12	313.943	365.048	406.256	648.767	453.078	371.94	419.189	240.725	131.261	446.51	290.748	787.906	353.97	287.649	622.464
ABCC11	0	20.3614	4.6868	7.785	1.4033	11.1797	2.8817	10.4215	11.5936	7.1676	1.3545	14.1987	6.8268	1.3195	3.9867	2.2479	1.3187	0.7664	3.0517	13.5057	1.0457	2.6509	9.3667	5.5126	1.2706	3.8712	2.7395	12.7558	5.755	0	2.723	1.9022	0.9605	4.7882	4.8901	13.2038	4.9664	22.2791	2.1704	3.9317	7.1964	5.4533	5.6255	5.4739	11.3505	3.9914	3.4101	11.5059	17.7847
ABCC12	0	0	0	0	1.4033	1.2422	0	0	0	0	1.3545	0	0	0	0	1.1239	0	0.7664	0	1.8008	0	0	1.8733	0.9188	0	1.2904	0	1.2756	0	0	0	0	0	0	0	0	0	0	0	0	0	0	0	0	0.8731	0	0	0	0
ABCC13	2.5612	229.792	164.036	0	2.8067	99.375	0	220.935	0	32.2542	311.528	373.534	1.1378	0	54.8168	3.3718	3.9562	1.5328	95.6214	1.8008	1.0457	0	0	0	409.123	1.2904	0.9132	8.929	5.755	5.4127	115.272	21.8756	24.0129	309.637	0	0.7767	106.282	28.5172	0	52.6849	0	0	261.585	0	3.4925	1.5966	68.8844	174.123	5.9282
ABCC2	44.8206	331.599	149.039	12.2336	272.248	417.375	397.677	51.0652	78.2565	32.2542	528.243	115.774	1239.06	2252.37	386.707	1503.82	383.748	695.132	509.642	566.337	253.071	841.216	59.0099	175.484	17.7879	567.775	614.567	386.5	4497.93	851.957	1036.54	74.1867	4.8026	296.869	611.259	1400.38	278.121	1412.49	460.675	295.664	2279.45	2476.59	231.582	498.902	87.3116	31.9314	253.031	25.3131	124.493
ABCC3	1649.4	479.946	176.222	764.045	515.026	70.8047	3616.56	122.973	637.646	236.53	1468.24	175.845	417.572	1810.34	251.161	464.183	2429.08	2128.32	862.627	303.427	607.58	767.875	886.086	294.004	180.421	338.084	485.809	257.667	1019.45	373.476	535.517	935.894	103.736	143.646	281.668	748.736	497.638	2143.25	863.291	246.911	424.586	1803.49	115.322	1943.22	148.43	933.194	547.665	263.87	237.129
ABCC4	455.89	677.742	620.527	431.513	390.129	1019.84	435.139	184.46	275.347	467.685	488.963	562.485	1475.72	551.546	934.875	532.743	859.805	662.177	545.245	697.792	1121.04	538.131	491.749	700.097	462.487	695.525	937.831	668.403	688.954	1457.1	699.802	849.343	258.379	727.808	1246.97	816.309	706.229	1607.66	482.379	739.161	631.482	1592.37	853.197	1335.62	884.466	367.211	746.134	606.747	450.546
ABCC5	1873.5	1794.71	1044.21	1063.21	1013.21	1966.38	1472.56	1583.02	2118.72	2793.57	1770.29	2548.11	2017.32	1596.58	2163.77	1429.64	2003.14	1209.39	1348.87	1307.35	1610.45	1440.32	1022.84	1718.09	1841.05	1899.47	1194.43	1410.79	1211.84	1343.43	1648.3	2099.1	1883.57	1984.71	978.992	1464.85	951.572	1180.79	1111.26	1124.47	1367.31	1154.55	915.077	1707.06	1344.6	1205.41	867.534	621.321	918.876
ABCC5-AS1	3.8418	8.7263	0.9374	0	1.4033	4.9688	5.7634	3.1264	5.7968	14.3352	1.3545	12.0142	5.689	2.639	4.9833	1.1239	2.6374	1.5328	0	0.9004	6.2745	3.5345	0.9367	1.8375	1.2706	2.5808	0.9132	0	1.6443	1.0825	0	1.9022	0	2.3941	0	0.7767	0	0.8912	1.6278	2.359	2.6986	1.5581	0.9376	0	0.8731	0	1.364	0.7671	0
ABCC6	56.3459	1236.23	521.167	41.1494	108.057	165.211	331.397	9.3793	57.9678	68.0921	86.686	169.292	321.997	356.262	583.051	423.722	313.855	511.194	570.677	447.487	223.79	185.562	115.21	203.965	33.0348	571.647	375.315	438.799	345.299	297.698	334.925	107.476	17.2893	114.917	110.516	163.106	657.558	513.31	654.929	553.584	385.906	187.75	288.774	388.643	261.062	70.249	672.476	73.638	177.847
ABCC6P1	8.9641	447.95	95.6098	6.6729	40.6969	36.0235	25.9355	1.0421	17.3903	5.3757	5.4179	69.9011	55.7521	83.1277	111.627	105.65	108.135	90.4362	129.191	55.8234	66.9279	31.8107	10.3033	20.2128	3.8117	309.696	96.7965	113.526	117.566	33.5587	73.5201	34.24	1.921	10.3745	32.2745	23.3009	126.148	23.1703	145.419	116.379	121.439	51.4171	106.884	96.1834	26.1935	3.1931	111.852	30.6825	11.8565
ABCC6P2	8.9641	72.7191	20.6217	4.4486	15.4367	7.4531	11.5269	1.0421	4.8307	0	8.1268	6.5532	12.5158	27.7092	47.8401	28.0983	27.6931	28.3571	38.6554	27.0113	20.915	5.3018	7.4933	9.1876	1.2706	37.4216	28.3084	35.7162	13.1542	20.5682	20.8761	0.9511	7.6841	4.7882	4.8901	8.5437	33.7719	16.041	12.48	18.8722	10.7946	11.6857	45.0038	23.4594	3.4925	6.3863	25.9169	8.4377	35.5694
ABCC8	2.5612	0	12.1856	4.4486	5.6134	33.5391	0	22.9272	2.8984	150.519	50.1153	88.4685	3.4134	2.639	24.9167	19.1068	2.6374	19.1602	25.4312	52.2219	11.5032	24.7417	21.5433	33.9942	35.5759	9.0328	43.8324	99.4951	3.2886	50.8793	12.7072	20.9245	47.0652	308.839	14.6702	12.4272	24.8322	16.041	21.1617	22.8039	35.9819	7.0114	3.7503	4.6919	90.8041	35.9228	22.5068	26.0801	23.7129
ABCC9	580.107	130.894	355.256	328.083	421.002	289.43	57.6344	274.085	533.304	154.103	419.885	204.242	182.048	463.14	489.364	386.632	287.481	209.23	183.105	133.256	393.202	911.907	457.093	977.563	560.32	396.152	410.015	775.552	552.478	875.773	540.963	766.596	951.871	878.636	573.116	437.28	874.095	95.3545	588.188	464.728	503.746	399.651	403.159	171.253	284.636	454.224	1143.07	167.22	82.9952
ABCD1	202.333	276.333	304.639	457.092	675.007	255.891	982.666	269.916	361.333	1148.61	321.009	490.4	390.265	378.693	322.921	400.119	204.402	365.577	388.589	727.505	222.744	503.67	369.983	191.103	246.49	147.106	296.782	155.62	466.154	207.847	385.753	271.067	336.18	634.438	234.724	242.329	357.584	548.066	282.699	214.671	225.786	307.723	259.709	332.341	492.437	675.348	289.178	464.84	1203.43
ABCD1P2	0	0	0	0	0	2.4844	0	0	0	0	0	0	0	0	0	0	0	0	0	1.8008	0	0	0	0	0	0	0	0	0	0	0	0	0	0	0	0	0	0	0	0.7863	0	0	0	0	0	0	0	0	0
ABCD1P3	0	0	0	0	0	0	0	1.0421	0	0	0	0	0	0	0	0	0	0	0	0	0	0	0	0	0	0	0	0	0	0	0	0	0	0	0	0	0	0	0	0	0	0	0	0	0	0	0	0	0
ABCD1P4	0	0	0	0	0	0	0	0	0	0	0	0	0	0	0	0	0	0	0	0	0	0	0	0	0	0	0	0	0	0	0	0	0	0	0	0	0	0	0	0	0	0	0	0	0	0	0	0	0
ABCD1P5	0	0	0	0	0	0	0	0	0	0	0	0	0	0	0	0	0	0	1.0172	1.8008	0	0	0	0	0	0	0	0	0	0	0	0	0	0	0	0	0	0	0	0	0	0	0	0	0	0	0	0	0
ABCD2	20.4894	2.9088	29.0579	10.0093	32.2768	34.7813	5.7634	6.2529	35.7468	28.6704	12.1902	19.6597	14.7914	13.1949	10.9634	5.6197	19.7808	8.4305	31.5347	10.8045	34.5097	30.0434	27.1633	18.3753	11.4351	21.9368	25.5689	15.3069	40.2849	16.2381	38.1215	19.9733	21.1313	16.7587	16.6262	41.9416	19.8658	5.347	14.6504	8.6498	22.4887	26.4876	8.4382	3.1279	13.9699	16.764	29.327	8.4377	0
ABCD3	389.299	837.725	405.873	399.261	437.842	525.446	181.548	498.146	655.036	236.53	326.427	397.562	438.052	329.872	544.181	520.38	534.082	340.285	525.918	166.57	721.567	418.841	570.429	479.594	702.624	623.263	697.666	802.339	487.529	705.815	480.15	530.72	408.219	745.365	567.248	502.523	605.907	319.928	407.499	474.164	782.606	556.239	947.893	535.655	758.738	147.683	619.278	778.569	124.493
ABCD4	653.101	901.717	464.926	691.755	637.117	665.813	789.591	426.238	598.034	707.8	438.848	688.088	565.486	672.939	715.608	705.828	702.878	828.487	638.832	1125.47	521.829	571.709	600.403	606.383	533.638	911.021	584.432	627.584	562.344	599.726	551.855	577.325	427.429	439.717	455.755	524.27	593.987	891.164	749.343	712.425	608.993	542.216	390.971	426.96	467.99	665.769	529.933	250.83	835.88
ABCE1	398.263	264.698	241.837	205.747	179.628	299.367	66.2795	283.464	290.805	109.306	463.228	208.611	284.45	269.175	300.994	191.068	379.791	173.208	232.95	99.9418	347.189	212.955	277.253	282.06	402.77	318.728	335.135	362.264	420.936	315.019	444.751	390.907	356.351	422.16	398.052	453.591	296	221.9	262.08	263.424	337.33	463.533	486.604	402.719	378.059	160.455	337.602	730.244	29.6412
ABCF1	277.888	337.417	498.671	375.906	350.835	267.07	426.494	443.955	456.013	258.033	230.26	267.59	447.155	424.875	314.947	384.384	292.756	367.876	399.779	325.936	415.162	403.819	334.39	265.522	343.053	185.817	383.533	323.997	768.701	360.485	350.355	365.227	416.864	369.49	373.601	492.426	387.383	593.515	467.186	404.966	343.627	472.102	434.099	541.129	422.588	585.94	481.509	686.521	385.335
ABCF2	201.053	177.435	291.516	243.56	204.888	203.719	345.806	326.192	239.6	215.028	230.26	197.689	199.115	221.674	220.264	186.572	200.445	285.87	261.433	173.773	213.333	205.886	245.406	164.458	179.15	113.555	198.159	159.447	236.776	215.425	186.977	225.413	204.59	203.499	257.218	215.922	214.551	316.363	239.291	189.508	232.083	202.552	299.088	288.55	228.756	225.914	217.566	286.115	183.775
ABCF2P1	2.5612	0	0	1.1121	1.4033	1.2422	0	1.0421	4.8307	0	1.3545	1.0922	0	0	0	0	0	0	0	0	1.0457	0	0.9367	0	0	2.5808	0	1.2756	1.6443	0	0	0	0.9605	0	1.956	0.7767	0	0	1.0852	2.359	0	0	0.9376	0.782	0	0.7983	0	0	0
ABCF2P2	0	0	0	0	0	0	0	0	0	0	0	0	0	0	0	0	0	0	0	0	0	0	0	0	0	0	0	1.2756	0	0	0	0	0	0	0	0	0	0	0	0	0	0	0	0	0	0	0	0	0
ABCF3	274.046	369.413	390.875	305.84	280.668	346.57	409.204	437.702	366.163	401.385	274.957	403.023	373.198	308.76	267.107	336.055	301.987	357.146	342.813	415.074	375.424	313.689	343.756	285.735	334.159	261.951	337.875	317.619	268.84	279.295	324.941	310.062	346.746	416.574	341.327	327.766	334.739	577.474	403.158	383.735	343.627	331.874	396.596	426.178	674.045	470.988	433.085	319.865	379.407
ABCG1	413.63	148.347	489.297	645.045	791.484	159	550.408	1143.24	341.044	231.155	262.767	200.965	176.359	416.958	369.764	500.149	241.326	204.631	281.778	436.683	224.836	867.726	788.672	260.01	172.797	174.204	257.515	121.18	661.001	247.901	473.796	338.596	559.02	376.672	266.02	324.659	242.363	355.574	324.48	233.543	365.216	209.564	419.098	196.277	187.72	411.914	281.676	354.383	361.622
ABCG2	64.0295	75.6279	43.1182	32.2523	39.2935	59.625	14.4086	168.828	69.5614	68.0921	101.585	65.5322	23.8938	36.9457	45.8468	76.4273	27.6931	31.4227	34.5865	20.7087	35.5555	95.4321	24.3533	111.17	69.8812	81.2951	43.8324	139.038	84.6805	92.0157	107.103	67.5289	53.7889	133.272	112.472	26.4077	115.222	26.7349	116.118	29.0946	125.037	45.1847	131.261	4.6919	36.6709	19.1588	98.2114	24.546	5.9282
ABCG4	26.8924	14.5438	3.7494	27.8037	19.6468	6.2109	8.6452	4.1686	16.4242	16.1271	23.026	10.922	11.378	5.278	20.93	12.3632	10.5498	12.2625	9.1552	17.1072	2.0915	16.789	14.05	25.7254	11.4351	10.3232	4.5659	10.2046	3.2886	8.6603	4.5383	10.4622	5.7631	11.1725	4.8901	8.5437	9.9329	8.0205	8.1391	3.1454	8.9955	1.5581	13.1261	1.564	6.9849	26.3434	7.5023	1.5341	35.5694
ABCG5	5.1224	29.0877	27.1832	10.0093	0	7.4531	8.6452	6.2529	11.5936	7.1676	2.7089	7.6454	6.8268	2.639	5.98	5.6197	15.8246	5.3649	8.138	0.9004	12.549	12.3708	5.62	11.0252	6.3528	16.7752	3.6527	3.8267	0	11.9079	5.4459	2.8533	0.9605	7.9803	0	2.3301	9.9329	7.1293	5.4261	19.6585	1.7991	4.6743	2.8127	3.9099	1.7462	0	14.3225	7.6706	0
ABCG8	12.8059	52.3578	78.7375	5.5607	15.4367	27.3281	8.6452	12.5058	26.0855	16.1271	2.7089	20.7519	6.8268	1.3195	22.9234	25.8504	14.5059	29.8899	17.2932	18.9079	11.5032	19.4399	9.3667	13.7814	8.894	18.0656	4.5659	16.5825	2.4664	28.146	14.5225	12.3645	3.8421	21.5469	3.9121	9.3204	15.8926	26.7349	7.0539	42.4624	6.2968	27.2666	10.3134	14.8576	8.7312	5.588	32.0551	14.5742	11.8565
ABHD1	39.6983	75.6279	29.9952	8.8972	32.2768	43.4766	11.5269	12.5058	27.0516	78.8435	21.6715	39.3193	43.2363	9.2364	32.8901	22.4786	39.5616	25.2915	36.6209	20.7087	20.915	34.4616	12.1767	45.0194	13.9762	49.0352	16.4371	30.6139	6.5771	21.6508	20.8761	11.4133	24.0129	13.5666	16.6262	12.4272	23.839	21.3879	16.2783	13.3678	9.895	26.4876	48.7541	14.0756	14.843	19.1588	21.1427	12.273	5.9282
ABHD10	99.886	270.515	418.996	140.131	140.334	270.797	100.86	374.131	191.294	390.634	243.804	228.271	236.662	175.492	358.801	247.265	156.928	149.45	205.484	103.543	282.352	206.77	150.803	152.515	166.444	270.984	360.704	331.65	193.203	307.441	380.308	214.951	217.076	347.145	340.349	193.398	300.967	131.892	219.214	228.039	389.504	201.773	604.739	353.454	427.827	100.584	285.086	187.93	88.9235
ABHD11	108.85	168.708	155.6	422.616	176.821	120.492	406.322	112.552	133.326	127.225	140.865	187.859	186.599	180.77	124.584	220.29	216.27	259.812	122.07	281.818	185.098	180.261	351.25	124.952	423.099	132.911	150.674	107.149	93.724	167.793	136.148	185.467	83.5648	118.907	150.614	112.621	151.973	267.349	210.532	157.268	153.823	111.404	88.1325	164.215	192.959	188.395	200.515	194.067	373.478
ABHD11-AS1	10.2447	0	4.6868	28.9158	7.0167	3.7266	2.8817	3.1264	2.8984	14.3352	5.4179	6.5532	6.8268	6.5974	2.99	4.4957	11.8685	3.0656	2.0345	9.9041	9.4117	7.069	12.1767	4.5938	3.8117	3.8712	4.5659	5.1023	2.4664	0	3.6306	4.7556	0.9605	3.1921	0.978	0.7767	2.9799	7.1293	11.9374	3.1454	0.8995	3.8952	0.9376	0	2.6193	4.7897	2.7281	2.3012	5.9282
ABHD12	283.01	311.238	412.435	415.943	412.582	229.805	922.15	1080.71	359.4	784.851	312.882	654.23	669.025	445.987	438.534	386.632	321.768	453.714	380.451	389.863	379.607	351.685	506.736	282.979	487.898	194.85	366.183	257.667	544.257	461.161	298.619	451.778	498.507	647.206	583.875	442.717	320.833	772.639	328.278	302.741	438.979	387.965	383.47	389.425	898.436	475.777	332.828	483.25	3284.24
ABHD12B	14.0865	34.9052	13.1229	4.4486	11.2267	19.875	11.5269	17.7165	20.2887	50.1731	9.4813	44.7804	9.1024	6.5974	11.96	5.6197	36.9242	8.4305	26.4485	9.0038	6.2745	9.7199	1.8733	16.5377	6.3528	19.356	5.479	10.2046	6.5771	5.4127	2.723	2.8533	14.4077	6.3843	4.8901	3.8835	15.8926	2.6735	6.5113	2.359	3.5982	7.7905	3.7503	5.4739	10.4774	6.3863	13.6405	12.273	11.8565
ABHD13	185.685	191.978	157.475	173.495	209.098	247.195	95.0967	140.69	323.654	148.727	186.917	172.568	141.087	207.16	194.35	177.581	299.349	125.691	178.018	72.9305	227.973	190.864	263.203	256.335	264.278	274.855	188.114	220.675	253.219	228.416	282.281	231.12	283.352	220.258	222.987	226.019	221.504	117.634	215.416	197.372	232.983	298.375	303.776	215.826	211.294	129.322	193.695	174.89	219.345
ABHD14A	37.1371	75.6279	96.5472	42.2616	94.0238	69.5625	103.742	55.2338	67.6291	139.768	44.6975	79.7309	105.815	71.2523	101.66	125.88	56.705	129.523	90.5351	129.654	96.2089	81.294	60.8833	51.4507	41.9287	46.4544	88.578	104.597	50.1506	93.0983	57.1823	77.9912	48.0258	85.3897	92.9114	78.4464	114.228	112.287	98.7548	146.26	60.2697	96.6017	119.073	67.2502	103.028	83.8198	133.677	36.819	53.3541
ABHD14A-ACY1	0	0	17.8097	5.5607	18.2434	69.5625	8.6452	30.2223	21.2549	14.3352	10.8357	55.7024	18.2048	15.8339	19.9334	71.9315	51.4301	49.8165	24.414	37.8158	14.6405	33.578	10.3033	65.2321	52.0933	86.4567	37.4402	62.5033	23.8421	34.6412	29.9526	19.0222	17.2893	17.5568	22.4943	25.631	45.6913	89.1164	70.5392	64.48	40.4796	27.2666	14.0637	12.5117	55.0063	31.9314	80.4788	19.9436	29.6412
ABHD14B	229.226	805.728	1047.96	438.186	663.78	342.844	803.999	726.376	431.86	804.562	604.093	623.648	610.998	389.249	560.128	726.059	498.476	633.053	669.35	452.89	484.182	519.575	505.799	411.606	454.863	549.71	509.552	623.758	422.58	583.488	532.794	550.694	490.823	592.142	385.338	548.348	798.605	705.802	581.677	666.818	571.212	530.531	1374.49	305.754	676.665	371.202	541.527	530.808	284.555
ABHD15	194.65	174.526	273.707	256.906	214.711	223.594	484.129	330.361	116.902	275.952	146.283	173.66	256.005	246.744	263.12	213.547	183.302	316.527	247.191	432.181	145.359	203.235	267.886	146.083	148.656	198.721	220.988	225.777	226.911	197.022	212.391	244.436	112.38	197.115	228.855	271.844	205.611	332.404	277.816	123.456	185.307	246.179	196.892	265.873	192.085	443.846	221.658	88.9793	1114.51
ABHD15-AS1	0	0	0	0	0	0	0	0	0	0	0	0	0	0	0	0	0	0	0	0	0	0	0	0	0	0	0	0	0	0	0	0	0	0	0	0	0	0	0	0	0	0	0	0	0	0	0	0	0
ABHD16A	151.11	90.1717	215.591	258.018	241.375	139.125	285.29	155.28	176.802	277.744	108.358	163.831	199.115	207.16	191.36	176.457	160.884	252.148	184.122	204.386	204.967	183.795	230.42	173.646	168.986	153.557	216.422	179.857	413.537	211.095	177.9	189.271	228.603	300.061	232.767	229.902	205.611	299.431	287.583	153.337	247.375	200.215	222.206	240.849	261.935	409.52	223.022	230.886	213.416
ABHD16B	0	0	0	0	0	0	365.978	0	0	0	0	0	0	0	0	0	0	6.1313	0	38.7162	0	6.1854	74.9332	0	19.0585	0	0	0	0	0	6.3536	9.5111	0	0	0	0	0.9933	58.8168	0	0	15.2923	0	0	0	0	127.725	0	0	77.067
ABHD17A	1050.08	980.254	1115.45	1404.64	1021.63	549.047	2161.29	1234.94	946.807	1856.41	593.257	1047.42	882.931	919.683	798.332	899.144	738.483	1310.56	978.593	1804.36	614.9	972.878	1223.29	669.778	734.388	536.806	590.824	514.058	663.467	558.59	618.113	743.769	668.519	566.605	710.038	729.318	947.599	1777.87	1007.08	582.679	916.639	408.999	263.46	713.947	860.019	2572.87	709.305	861.412	6746.33
ABHD17AP1	40.9789	52.3578	71.2387	53.3831	67.3603	32.2969	164.258	47.9388	36.7129	94.9706	35.2162	69.9011	55.7521	35.6262	38.8701	35.9658	43.5178	56.7142	35.6037	47.72	20.915	51.2506	47.7699	25.7254	12.7057	20.6464	20.0898	29.3383	30.4192	28.146	19.0608	25.68	18.2498	17.5568	19.5603	16.3106	30.792	26.7349	22.247	7.8634	15.2923	6.2324	8.4382	32.0611	20.0817	25.5451	11.5944	24.546	47.4258
ABHD17AP3	3.8418	5.8175	4.6868	8.8972	9.8234	0	11.5269	7.295	9.6613	10.7514	10.8357	3.2766	0	3.9585	3.9867	3.3718	1.3187	4.5985	1.0172	5.4023	0	2.6509	7.4933	0.9188	6.3528	0	2.7395	0	4.1107	3.2476	0	1.9022	0.9605	6.3843	1.956	0.7767	10.9262	1.7823	2.1704	5.5044	2.6986	0	0	6.2558	1.7462	3.9914	0.682	2.3012	5.9282
ABHD17AP4	3.8418	0	1.8747	4.4486	0	1.2422	0	2.0843	1.9323	1.7919	0	5.461	0	1.3195	0	0	0	0.7664	1.0172	0	0	0	0	0	0	0	0.9132	1.2756	9.8657	0	0.9077	0	0	0	0.978	0	0	0	0	0	4.4977	0	0	0	0	1.5966	1.364	6.9036	0
ABHD17AP6	0	0	1.8747	2.2243	2.8067	6.2109	5.7634	0	0	28.6704	0	0	0	1.3195	0	2.2479	0	0.7664	0	0.9004	0	0	0.9367	0	0	0	0	0	0	0	0	0	0	0.798	0	0	0.9933	0	0	0.7863	0	1.5581	0	0	0	2.3949	0	3.0683	0
ABHD17AP9	0	0	0	0	0	0	0	0	0	0	0	0	0	0	0	0	0	0	0	0	0	0	0	0	0	0	0	0	0	0	0	0	0	0	0	0	0	0	0	0	0	0	0	0	0	0	0	0	0
ABHD17B	98.6054	93.0805	125.605	60.0559	70.167	157.758	86.4515	99.004	87.9178	51.965	138.156	87.3763	163.843	113.476	106.644	89.9144	108.135	79.7065	82.3971	99.0415	146.405	123.708	88.0466	121.277	141.033	85.1663	127.844	139.038	172.649	147.225	159.747	122.693	84.5253	170.779	225.921	162.33	144.027	138.13	122.087	125.815	197.001	241.504	250.334	91.4915	169.385	138.901	101.621	161.083	225.273
ABHD17C	125.498	78.5367	57.1784	94.5325	98.2338	115.523	138.322	52.1074	102.41	60.9245	73.1413	70.9933	197.977	105.559	135.547	112.393	101.541	172.442	56.9659	87.3366	113.987	144.032	105.843	144.246	124.516	165.171	114.147	197.715	74.8148	223.003	118.903	217.805	36.4996	83.7937	118.34	118.835	138.067	171.995	113.405	139.183	102.548	92.7065	96.5707	164.998	79.4536	79.0301	108.442	69.8027	94.8517
ABHD2	1491.89	2245.57	1735.04	1400.19	2575.13	1604.91	1386.11	6540.52	2510.01	3892	1389.68	6504.07	1427.94	2627.1	1769.09	2282.7	1277.84	1452.34	2183.02	741.911	2019.34	2073.88	2171.19	1635.4	1886.79	1409.12	1880.23	1642.94	2306.93	1902.02	2124.82	1644.47	2603.96	1947.2	1948.2	1300.97	2528.92	1207.53	1507.37	1905.31	2978.4	1399.17	4589.45	2413.97	3340.54	1231.75	1986.74	2229.08	515.756
ABHD3	156.232	159.982	90.9231	165.71	106.654	69.5625	63.3978	128.184	126.563	109.306	150.346	131.065	65.9923	87.0862	109.633	105.65	155.609	64.3783	131.225	59.4249	124.444	90.1303	175.156	106.576	294.772	95.4895	94.9702	73.9835	168.539	87.6856	161.563	199.733	115.262	145.242	99.7575	197.281	121.181	91.7899	138.365	103.797	121.439	167.495	91.8828	91.4915	104.774	127.725	122.764	94.3487	124.493
ABHD4	256.118	255.971	486.485	274.7	362.062	315.516	216.129	552.338	248.295	456.934	521.47	356.058	358.406	494.808	239.201	330.435	352.098	304.264	335.692	432.181	217.516	343.732	340.946	329.836	323.995	332.923	305.914	295.934	633.048	289.038	318.587	395.662	286.233	537.077	441.084	340.193	407.249	257.546	374.943	342.845	338.23	398.093	978.833	300.28	428.7	359.228	318.505	283.813	124.493
ABHD5	263.801	250.154	189.345	235.775	220.324	219.867	129.677	267.832	165.208	130.809	234.323	167.107	227.56	160.977	179.4	220.29	308.58	119.56	237.019	73.8309	210.196	167.006	318.466	204.884	226.161	259.37	184.461	184.959	177.582	186.196	269.574	250.142	256.458	203.499	325.679	253.203	217.53	166.648	143.791	258.706	188.005	210.343	590.675	164.998	154.542	114.155	201.197	213.244	148.206
ABHD6	120.375	308.329	274.644	94.5325	366.272	315.516	512.946	313.686	237.668	159.479	142.219	179.121	498.356	211.118	220.264	385.508	134.509	156.347	240.071	221.493	276.078	262.438	226.673	210.397	96.5631	295.501	199.072	250.013	303.37	230.581	373.046	103.671	284.312	325.598	270.91	336.31	222.497	402.806	166.038	204.449	357.12	313.956	442.537	184.547	288.128	100.584	204.607	170.288	254.914
ABHD8	94.7636	87.263	171.535	114.551	106.654	130.43	368.86	176.123	113.037	102.138	79.9136	123.419	166.119	146.463	121.594	109.021	98.904	168.61	139.363	216.09	120.261	153.752	94.6032	67.9884	55.905	59.3583	100.449	96.9439	103.59	111.501	129.795	131.253	116.222	138.858	152.57	158.446	135.087	233.485	131.311	124.242	134.932	109.846	88.1325	200.186	215.66	259.442	130.949	227.818	355.694
ABI1	341.917	209.431	268.082	350.326	287.685	299.367	126.796	432.491	322.687	263.409	449.683	302.541	367.509	270.495	348.834	300.089	327.043	223.791	290.933	167.47	435.032	318.107	332.516	384.043	327.807	352.279	367.096	401.807	562.344	366.98	494.672	418.489	343.864	347.145	420.546	435.727	319.839	242.397	335.332	412.829	366.116	535.984	606.614	404.283	400.76	289.777	437.177	358.218	160.062
ABI2	2104.01	1823.8	1087.33	1187.77	1470.7	1855.83	755.01	739.924	1576.72	1220.28	2172.57	1841.46	1249.3	1377.55	1551.81	1422.9	1976.76	951.113	1472.98	779.726	1292.55	1411.16	1356.29	2047	1780.07	2632.41	1389.85	1853.41	966.837	1531.79	1402.33	1557.92	1803.85	1391.77	1239.14	1082.72	1481	745.013	1256.14	1665.47	1257.57	1118.71	2432.08	1365.33	1374.28	686.524	1231.05	1691.37	2466.14
ABI3	138.304	69.8104	81.5496	279.149	200.678	48.4453	149.849	89.6246	190.328	329.709	79.9136	125.603	133.122	96.3226	179.4	112.393	121.322	197.733	109.863	208.887	150.588	132.545	152.677	107.495	102.916	46.4544	94.057	84.1882	166.894	112.584	102.565	186.418	72.0386	236.218	129.098	192.621	77.4766	232.594	132.939	44.8215	108.845	106.729	37.5032	84.4537	172.004	280.996	106.396	78.2404	462.402
ABI3BP	367.529	570.118	337.447	195.738	106.654	445.945	680.085	228.23	457.946	177.398	480.836	491.492	159.292	1553.04	771.422	1246.44	598.699	345.65	502.521	215.19	360.783	712.206	404.639	477.757	681.024	605.197	809.986	503.853	206.357	360.485	626.282	550.694	752.083	253.775	478.249	362.717	641.665	122.981	526.331	353.854	566.715	531.31	269.085	564.589	174.623	412.713	445.361	872.918	82.9952
ABL1	1531.59	1224.59	1280.42	1589.26	1721.9	3064.48	3296.69	1539.25	1680.1	1521.32	1558.99	1128.25	2463.33	1935.69	1346.5	1655.55	1003.55	1594.13	1267.49	4271.39	1445.22	1792	1584.84	1595.89	1059.65	1071.03	1097.64	1239.86	1500.41	1223.27	1255.29	1193.65	971.081	1308.78	1917.89	1708.73	1314.12	2408.82	1319.08	1488.54	1691.15	2069.93	1070.72	747.572	1555.89	2634.34	1102.15	1471.23	1120.44
ABL2	1759.53	802.819	842.679	1158.86	1142.32	792.516	711.784	1528.83	1287.85	804.562	2459.71	848.642	694.057	1229.76	830.225	715.944	1145.97	739.584	806.678	784.228	591.894	795.268	1169.9	959.188	977.067	829.726	798.115	668.403	1638.53	663.596	1192.66	834.125	585.914	952.056	887.059	736.309	761.853	462.514	718.414	886.993	985.004	894.345	1076.34	1014.23	645.233	1426.53	709.987	1291.73	563.182
ABLIM1	2250	5360.85	2838.3	2307.7	2966.66	2519.16	2204.51	2055.11	3862.59	3994.14	2341.88	5073.29	2532.74	3566.58	2624.23	3202.08	2942.06	2312.25	3474.92	1361.37	2639.47	2984.02	2790.33	1901.84	2483.96	2948.56	2692.04	2594.53	2282.26	3189.16	2072.18	2549.93	668.519	1498.71	2590.76	1721.94	3099.06	1615.68	1839.44	2846.56	2388.3	1921.91	5379.83	2136.37	2987.8	831.812	2520.76	2959.33	616.536
ABLIM2	78.116	506.125	458.365	443.747	109.461	36.0235	305.462	924.385	59.9001	1499.82	41.9885	792.94	60.3033	162.297	84.7168	183.201	305.943	184.704	334.675	169.271	69.0194	178.493	272.57	139.652	238.867	87.7471	98.6229	62.5033	159.495	68.1999	121.626	113.182	198.827	908.962	93.8894	74.5629	277.128	112.287	157.357	92.7883	251.873	71.6723	398.471	78.9798	49.7676	150.876	176.644	1043.21	243.057
ABLIM3	268.924	479.946	239.025	219.093	148.754	201.234	812.644	150.069	136.224	186.357	694.842	121.235	354.993	394.527	564.114	736.174	402.21	450.648	315.347	439.384	213.333	579.662	199.51	253.578	91.4809	238.724	210.943	257.667	339.544	268.469	579.992	137.911	108.538	318.416	357.953	375.921	283.088	612.23	349.44	209.953	723.236	440.94	225.957	267.437	93.4234	259.442	151.409	268.472	254.914
ABO	197.211	4066.45	1137.94	380.354	509.413	799.969	910.623	28.138	325.586	198.901	1492.62	323.292	1328.95	700.648	1123.25	420.35	826.837	463.677	2322.38	467.296	911.893	387.03	432.74	812.186	782.67	1819.46	283.084	1043.42	285.283	1398.64	541.87	1260.22	44.1837	474.033	417.612	891.648	718.149	554.304	133.482	1848.69	352.623	1181.03	1450.44	883.636	31.4322	179.614	864.124	1215.79	367.55
ABR	1666.05	3953.01	3891.88	2536.81	7948.52	5300.42	12160.8	3053.49	9555.99	10796.2	5094.16	10855.4	8855.48	5326.77	4376.37	4756.47	5379.06	6117.47	3657.01	7123.78	6763.9	4117.72	3053.53	1530.66	2900.71	1633.64	5174.05	1964.39	3438.19	4332.32	3194.95	4394.14	4744.95	4022.1	4877.36	5038.43	2672.94	10127.2	1334.82	2295.33	5084.24	3366.26	3883.45	4778.67	15760.6	4103.98	2380.95	3714.12	21371.3
ABRA	5.1224	20.3614	6.5615	6.6729	5.6134	32.2969	0	2.0843	18.3565	7.1676	6.7723	7.6454	20.4804	19.7923	14.95	8.9914	85.7168	6.1313	17.2932	1.8008	8.366	23.858	8.43	19.294	8.894	21.9368	8.2186	5.1023	5.755	4.3302	9.9842	6.6578	2.8815	3.1921	10.7582	11.6505	12.9128	3.5647	8.1391	26.7356	7.1964	20.2552	10.3134	19.5495	0.8731	41.5108	6.1382	2.3012	0
ABRACL	70.4324	29.0877	36.5567	71.1774	94.0238	105.586	17.2903	76.0767	52.171	41.2136	54.1787	22.9363	98.9884	60.6964	36.8767	52.8247	35.6054	44.4517	47.8107	13.5057	62.7449	60.9705	91.7932	28.4816	50.8227	41.2928	68.4881	54.8499	161.139	57.3745	152.486	57.0667	18.2498	52.6703	66.505	97.0871	65.5571	108.722	55.3461	79.4205	84.5574	122.31	89.07	121.989	41.9096	34.3262	63.4282	64.4333	11.8565
ABT1	94.7636	75.6279	149.976	105.654	98.2338	81.9844	106.624	102.13	129.461	137.976	54.1787	107.036	96.7128	98.9616	105.647	94.4101	117.366	84.3049	109.863	83.7351	107.712	92.7812	106.78	107.495	105.457	77.4239	100.449	88.0149	183.337	97.4284	130.702	109.378	93.17	176.366	135.944	104.077	110.255	125.654	102.01	81.7795	123.238	115.299	188.453	152.486	199.07	125.331	121.4	190.232	82.9952
ABT1P1	11.5253	20.3614	6.5615	4.4486	14.0334	3.7266	14.4086	5.2107	6.7629	10.7514	12.1902	5.461	4.5512	3.9585	2.99	6.7436	17.1434	9.1969	14.2415	2.7011	5.2287	5.3018	6.5567	8.2689	12.7057	12.904	4.5659	1.2756	2.4664	5.4127	4.5383	7.6089	5.7631	2.3941	5.8681	4.6602	3.9732	6.2381	3.7983	1.5727	5.3973	3.1162	15.0013	2.3459	4.3656	3.1931	9.5483	4.6024	0
ABTB1	379.055	293.785	391.813	568.307	339.608	432.281	677.204	403.311	415.436	885.197	182.853	490.4	362.958	438.07	486.374	419.226	423.309	740.351	526.935	944.495	307.45	467.441	548.886	565.958	400.229	412.928	402.71	409.461	291.86	347.495	371.231	490.774	675.242	255.371	350.129	346.407	492.672	629.162	622.915	282.297	412.892	310.06	217.518	488.737	514.265	1013.82	401.03	226.284	1932.6
ABTB2	500.711	506.125	525.854	405.934	263.828	131.672	1412.04	355.372	180.666	854.735	243.804	445.619	526.801	420.917	419.598	533.867	286.162	518.859	372.313	384.461	222.744	415.307	455.219	301.354	196.938	202.593	172.59	256.391	397.916	251.149	275.02	265.36	313.128	130.878	156.482	189.514	489.692	800.265	457.962	307.459	400.298	239.946	255.959	112.605	110.013	375.193	351.924	525.438	1298.28
AC000003.1	0	0	0	0	0	0	0	0	0	0	0	0	0	0	0	0	0	0	0	0	0	0	0	0	0	0	0	0	0	0	0	0	0	0	0	0	0	0	0	0	0	0	0	0	0	0	0	0	0
AC000029.1	0	0	0	0	0	0	0	0	0	0	0	0	0	0	0	0	0	0	0	0	0	0	0	0	0	0	0	0	0	0	0	0	0	0	0	0	0	0	0	0	0	0	0	0	0	0	0	0	0
AC000032.2	0	0	0	6.6729	0	0	0	0	0	48.3812	0	0	0	0	0	0	0	0	0	0	0	3.5345	2.81	8.2689	0	3.8712	5.479	2.5512	0.8221	7.5778	1.8153	0	0	2.3941	0	0	0	0	1.0852	0	0	1.5581	0	0	0	0	0	1.5341	0
AC000036.4	30.7342	11.6351	5.6241	11.1215	22.4534	4.9688	0	3.1264	19.3226	14.3352	6.7723	22.9363	21.6182	7.9169	9.9667	13.4872	47.4739	9.9633	7.1207	3.6015	21.9607	11.4872	12.1767	17.4565	16.5174	16.7752	7.3054	12.7558	4.9328	11.9079	8.1689	2.8533	2.8815	4.7882	10.7582	2.3301	4.9664	6.2381	6.5113	8.6498	21.5891	4.6743	9.3758	4.6919	3.4925	1.5966	6.8202	1.5341	0
AC000041.8	3.8418	0	0.9374	0	0	0	0	0	1.9323	0	0	0	3.4134	0	2.99	0	0	0	0	0	6.2745	0	0	2.7563	0	7.7424	1.8263	0	0.8221	4.3302	0	0	6.7236	0	9.7801	1.5534	0	0	7.5965	3.1454	0	0	0	0	0	1.5966	4.7742	3.0683	5.9282
AC000067.1	2.5612	0	0	0	1.4033	0	0	0	0.9661	0	0	0	0	0	0.9967	0	0	0	0	0	0	0	0	0	0	0	0	0	0	0	0.9077	0	0	0	0	0	0	0	0	0.7863	1.7991	0	0	0	0.8731	0	0	0	0
AC000068.10	8.9641	0	9.3735	2.2243	8.42	11.1797	11.5269	8.3372	0.9661	3.5838	0	3.2766	5.689	2.639	6.9767	4.4957	0	6.1313	5.0862	0.9004	2.0915	1.7673	9.3667	0.9188	1.2706	1.2904	0.9132	8.929	3.2886	2.1651	0.9077	1.9022	1.921	0.798	6.8461	1.5534	4.9664	1.7823	1.6278	0.7863	0.8995	2.3371	1.8752	5.4739	0	7.9828	2.7281	4.6024	0
AC000068.5	12.8059	17.4526	11.2482	13.3458	9.8234	13.6641	20.172	15.6322	28.9839	26.8785	10.8357	28.3973	19.3426	21.1118	21.9267	23.6025	39.5616	18.3938	12.207	12.6053	16.732	11.4872	24.3533	18.3753	11.4351	34.8408	17.3503	19.1337	7.3993	15.1555	15.4301	23.7778	9.6052	3.1921	13.6922	6.2136	15.8926	11.5851	10.8522	17.2995	18.8905	7.7905	8.4382	5.4739	6.1118	5.588	11.5944	7.6706	0
AC000068.9	20.4894	5.8175	1.8747	8.8972	16.8401	14.9063	0	6.2529	8.6952	14.3352	13.5447	5.461	4.5512	3.9585	5.98	14.6111	18.4621	3.0656	1.0172	0	0	2.6509	2.81	18.3753	0	32.26	2.7395	7.6535	0	5.4127	10.8919	0	0	1.5961	13.6922	2.3301	1.9866	0	2.1704	0	0	3.8952	0	0	0	0	6.8202	0	0
AC000077.2	0	0	0	0	0	0	0	1.0421	0	0	0	0	0	0	0	0	0	0	0	0	0	0	0	0	0	0	0	0	0	0	0	0	0	0	0	0	0	0	0	0	0	0	0	0	0	0	0	0	0
AC000078.5	39.6983	49.449	26.2458	25.5794	19.6468	14.9063	17.2903	42.728	17.3903	19.7109	14.8992	21.8441	19.3426	30.3482	13.9534	25.8504	15.8246	22.9923	24.414	27.9117	11.5032	12.3708	23.4166	11.9439	16.5174	27.0984	8.2186	12.7558	9.8657	8.6603	11.7995	12.3645	17.2893	15.9607	4.8901	9.3204	11.9195	9.8028	10.8522	14.9405	12.5937	8.5695	3.7503	10.1657	5.2387	21.5537	15.6865	6.1365	0
AC000081.2	3.8418	2.9088	0	0	1.4033	3.7266	0	3.1264	0	1.7919	0	2.1844	1.1378	0	0.9967	2.2479	9.231	2.2992	1.0172	0	1.0457	1.7673	0	1.8375	5.0823	1.2904	2.7395	0	0	0	0.9077	3.8044	1.921	0	0.978	0	0.9933	0	0	0	0	0	0	0	0	0	0	0	0
AC000089.3	19.2088	61.0841	56.2411	17.7944	29.4701	9.9375	60.5161	26.0537	6.7629	26.8785	17.6081	18.5675	12.5158	19.7923	13.9534	7.8675	11.8685	12.2625	51.8797	11.7049	4.183	18.5562	28.1	10.1064	16.5174	5.1616	4.5659	2.5512	12.3321	7.5778	10.8919	3.8044	21.1313	17.5568	8.8021	3.8835	21.8524	4.4558	4.3409	34.599	8.9955	6.2324	14.0637	7.0378	15.7161	11.9743	24.5529	12.273	5.9282
AC000095.11	2.5612	119.259	2.8121	5.5607	68.7637	1.2422	43.2258	27.0958	25.1194	37.6299	9.4813	7.6454	21.6182	158.339	6.9767	13.4872	21.0995	19.1602	19.3277	4.5019	9.4117	6.1854	6.5567	3.6751	1.2706	12.904	3.6527	8.929	4.9328	12.9905	1.8153	0.9511	5.7631	11.1725	0	6.9903	7.9463	32.9731	2.713	21.2312	4.4977	4.6743	10.3134	13.2936	31.4322	3.9914	8.8663	3.0683	0
AC000095.9	1.2806	61.0841	5.6241	8.8972	44.9069	1.2422	37.4623	18.7586	37.6791	19.7109	9.4813	4.3688	11.378	127.99	13.9534	0	15.8246	16.861	25.4312	8.1034	13.5947	8.8363	15.9233	0	5.0823	0	10.0449	5.1023	2.4664	0	0.9077	4.7556	1.921	19.1528	0	0	3.9732	13.3675	0.5426	0	2.6986	0	0	14.0756	30.5591	1.5966	8.1843	2.3012	0
AC000099.1	0	5.8175	0.9374	21.1308	8.42	1.2422	0	2.0843	21.2549	1.7919	4.0634	0	10.2402	1.3195	3.9867	4.4957	19.7808	3.832	3.0517	0	11.5032	2.6509	4.6833	1.8375	2.5411	2.5808	0.9132	0	2.4664	2.1651	4.5383	0.9511	0	0	1.956	4.6602	6.953	0.8912	1.0852	3.1454	2.6986	13.2438	7.5006	3.9099	0	0	1.364	4.6024	0
AC000110.1	1.2806	0	0	0	0	0	2.8817	0	0	0	1.3545	2.1844	0	0	0.9967	1.1239	0	0	0	0	0	0	0	0	0	0	0	1.2756	0.8221	0	0	0	0	0	0	0	0	0	0	0.7863	0	0	2.8127	0	0	0	0	0	0
AC000111.3	1.2806	0	0	0	0	0	0	0	0	0	0	0	0	0	0	0	0	0	0	0	0	0	0	0	0	0	0	0	0	0	0	0	0	0	0	0	0	0	0	0	0	0	0	0	0	0	0	0	0
AC000111.4	2.5612	0	0	1.1121	0	2.4844	0	0	0	0	0	0	0	0	0	0	0	0	0	0	0	0	0	0	0	0	0	0	0	0	0	0	0	0	0	0	0	0	0	0	0	0	0	0	0	0	0	0	0
AC000111.5	1.2806	0	0	0	0	0	0	0	0	0	0	0	0	0	0	0	1.3187	0	0	0	0	0.8836	0	0	0	0	0	0	0	0	0	0	0	0	0	0	0	0	0	0	0	0	0	0	0	0	0	0	0
AC000111.6	1.2806	0	0	0	0	0	0	0	0	0	0	0	0	2.639	0	0	0	0	0	0	0	0	0.9367	0	0	0	0	1.2756	0	0	0	0	0	0	0	0	0	0	0	0	0	0	0	0	0	0	0	0	0
AC000120.7	64.0295	125.077	50.617	30.028	54.7303	124.219	20.172	47.9388	69.5614	112.89	100.231	69.9011	94.4372	35.6262	56.8101	64.064	105.498	42.9189	63.0694	63.9268	60.6534	39.7634	47.7699	87.2824	68.6107	104.522	46.5719	49.7475	38.6406	53.0444	54.4593	44.7022	34.5785	43.0939	52.8128	52.0387	36.7517	41.8847	28.2157	22.8039	61.1692	67.777	60.0051	41.4449	55.0063	12.7725	42.9675	50.6261	0
AC000123.2	297.097	308.329	257.772	179.056	224.535	273.281	48.9892	240.736	257.957	252.658	287.147	262.129	234.386	295.565	210.297	258.504	369.242	148.683	257.364	77.4324	279.215	193.515	195.763	305.948	255.384	512.288	224.641	228.328	224.444	202.435	344.001	291.991	256.458	217.863	212.229	253.203	237.396	146.151	199.137	204.449	238.38	299.933	420.036	279.166	207.802	97.3906	171.188	205.573	11.8565
AC000123.3	48.6624	58.1753	14.9976	10.0093	12.6301	21.1172	5.7634	8.3372	28.9839	14.3352	9.4813	18.5675	20.4804	14.5144	13.9534	7.8675	34.2867	11.4961	19.3277	9.0038	17.7777	13.2545	9.3667	13.7814	21.5997	30.9696	17.3503	20.4093	16.4428	9.7428	13.6148	13.3156	13.4472	18.3548	9.7801	10.0971	13.9061	3.5647	9.767	11.0088	17.0914	13.2438	14.0637	12.5117	9.6043	6.3863	7.5023	9.2048	0
AC000123.4	25.6118	11.6351	3.7494	14.4579	9.8234	11.1797	2.8817	11.4636	9.6613	0	5.4179	7.6454	6.8268	10.5559	7.9733	13.4872	17.1434	3.832	7.1207	0	5.2287	13.2545	13.1133	13.7814	6.3528	18.0656	7.3054	12.7558	8.2214	6.4952	9.9842	6.6578	7.6841	1.5961	4.8901	9.3204	3.9732	1.7823	8.6817	4.718	10.7946	7.0114	3.7503	3.9099	6.1118	1.5966	3.4101	4.6024	0
AC000124.1	1.2806	0	0.9374	1.1121	0	2.4844	0	0	0.9661	0	0	0	1.1378	0	0.9967	0	0	0.7664	1.0172	0	0	0.8836	0	0	2.5411	3.8712	0.9132	1.2756	0	3.2476	0	0	0.9605	0.798	0	0	0.9933	0.8912	0	0.7863	2.6986	0	0.9376	0.782	0.8731	0	0	0.7671	0
AC000362.1	2.5612	0	0	5.5607	1.4033	0	0	0	3.8645	1.7919	2.7089	0	7.9646	0	0	0	7.9123	2.2992	1.0172	2.7011	2.0915	3.5345	0	0	0	0	0.9132	0	0	2.1651	0.9077	0.9511	0	0	0	0.7767	0	1.7823	0	2.359	0.8995	0.779	3.7503	0	0	0	0	1.5341	0
AC000367.1	2.5612	5.8175	2.8121	17.7944	4.21	4.9688	8.6452	1.0421	15.4581	3.5838	2.7089	0	5.689	0	2.99	2.2479	10.5498	3.832	2.0345	0	8.366	2.6509	6.5567	3.6751	1.2706	2.5808	2.7395	0	1.6443	3.2476	0	3.8044	0	0.798	1.956	1.5534	0.9933	0	1.0852	3.9317	4.4977	3.1162	0.9376	1.564	0	0	0.682	3.0683	0
AC000370.2	0	0	0	0	0	0	0	0	0	0	0	0	0	0	0	0	0	0	0	0	0	0	0	0	0	0	0	0	0	0	0	0	0	0	0	0	0	0	0	0	0	0	0	0	0	0	0	0	0
AC000374.1	3.8418	8.7263	4.6868	10.0093	4.21	0	5.7634	0	16.4242	0	13.5447	0	11.378	3.9585	0	5.6197	23.737	6.1313	1.0172	0	8.366	8.8363	7.4933	0	3.8117	0	1.8263	2.5512	3.2886	1.0825	2.723	2.8533	0	1.5961	2.934	4.6602	2.9799	0	1.0852	8.6498	2.6986	9.3486	5.6255	0.782	0	0	1.364	3.0683	0
AC000403.1	0	0	0	0	0	0	0	0	0	0	0	0	0	0	0	0	0	0	0	0	0	0	0	0	0	0	0	0	0	0	0	0	0	0	0	0	0	0	0	0	0	0	0.9376	0	0.8731	0	0	0	0
AC000403.4	10.2447	0	4.6868	4.4486	11.2267	3.7266	0	4.1686	10.6274	0	14.8992	2.1844	1.1378	2.639	7.9733	8.9914	7.9123	2.2992	4.069	4.5019	5.2287	2.6509	9.3667	11.9439	0	21.9368	4.5659	5.1023	9.0435	5.4127	10.8919	3.8044	1.921	5.5862	3.9121	5.4369	2.9799	0	3.2557	7.8634	7.1964	7.0114	2.8127	3.1279	0	3.9914	6.1382	5.3694	0
AC001226.7	0	8.7263	0.9374	0	2.8067	4.9688	2.8817	3.1264	2.8984	3.5838	4.0634	3.2766	4.5512	1.3195	4.9833	3.3718	2.6374	2.2992	5.0862	1.8008	3.1372	0.8836	0.9367	0.9188	3.8117	6.452	2.7395	3.8267	3.2886	1.0825	3.6306	0.9511	1.921	0.798	4.8901	3.8835	4.9664	0	0	0	5.3973	0	5.6255	0.782	0	0	2.7281	0.7671	0
AC002044.1	56.3459	46.5402	14.9976	51.1588	30.8735	17.3906	8.6452	20.8429	35.7468	32.2542	46.0519	31.6739	10.2402	18.4728	30.8967	40.4615	50.1114	29.1235	33.5692	27.9117	20.915	32.6943	49.6433	52.3695	45.7404	47.7448	21.9162	39.5429	27.1306	27.0634	42.6598	42.8	25.9339	30.3253	13.6922	20.9708	39.7316	26.7349	30.3861	19.6585	46.7765	27.2666	18.7516	10.9477	16.5892	51.8885	21.8248	7.6706	17.7847
AC002044.3	51.2236	2.9088	9.3735	23.3551	12.6301	14.9063	0	13.5479	15.4581	7.1676	18.9626	22.9363	9.1024	15.8339	15.9467	15.735	19.7808	3.832	9.1552	8.1034	7.3202	7.9527	7.4933	38.588	13.9762	16.7752	10.0449	15.3069	6.5771	11.9079	7.2612	2.8533	8.6446	13.5666	3.9121	8.5437	2.9799	4.4558	10.3096	7.0771	11.6941	9.3486	9.3758	8.6018	1.7462	7.9828	10.2304	3.8353	11.8565
AC002044.4	0	0	0	0	1.4033	0	0	1.0421	0	1.7919	0	0	0	0	0	0	0	0	1.0172	0	0	0	0.9367	0	0	0	0	0	0	0	0	0	0	0	0	0	0	0	0	0	0	0	0	0	0	0	0	0	0
AC002056.3	0	0	1.8747	5.5607	0	2.4844	0	1.0421	0.9661	7.1676	8.1268	0	2.2756	1.3195	0	5.6197	0	0	2.0345	0	4.183	0	0	0.9188	1.2706	0	2.7395	1.2756	0	0	0.9077	0	0.9605	0.798	0.978	0.7767	0	1.7823	0	0	0	0	4.6879	0.782	0.8731	0.7983	0	3.0683	0
AC002056.5	3.8418	5.8175	0	0	4.21	2.4844	0	0	0	1.7919	0	0	1.1378	0	1.9933	1.1239	1.3187	0.7664	1.0172	1.8008	1.0457	0	0.9367	4.5938	0	2.5808	0	2.5512	0.8221	0	0	0	0	0	0.978	0	0.9933	0	2.1704	0	1.7991	0	0	0	0	0	0	0	0
AC002059.10	0	0	1.8747	2.2243	0	2.4844	5.7634	9.3793	0.9661	7.1676	0	8.7376	3.4134	0	6.9767	2.2479	5.2749	0	5.0862	1.8008	2.0915	2.6509	1.8733	0.9188	3.8117	1.2904	0	0	7.3993	3.2476	0.9077	1.9022	0.9605	1.5961	0.978	0	2.9799	2.6735	1.6278	1.5727	1.7991	4.6743	0.9376	1.564	2.6193	6.3863	4.0921	0	0
AC002064.4	1.2806	5.8175	0.9374	0	0	0	0	0	0	0	0	0	0	0	1.9933	0	2.6374	0	2.0345	0.9004	0	0	0.9367	0	1.2706	1.2904	0	1.2756	0	2.1651	0	3.8044	0	0	0	0	0	0	2.1704	0	0	0	0	0.782	0	0	0	0	0
AC002064.5	2.5612	0	3.7494	0	4.21	3.7266	0	0	0.9661	0	5.4179	5.461	0	3.9585	6.9767	6.7436	5.2749	0.7664	1.0172	0	5.2287	6.1854	1.8733	8.2689	0	20.6464	6.3922	1.2756	0.8221	1.0825	0.9077	0.9511	0	1.5961	0.978	0	0.9933	0	2.1704	2.359	0.8995	0.779	0	0.782	0	0	1.364	0.7671	0
AC002064.7	0	2.9088	0	0	0	0	0	0	0	0	0	0	1.1378	0	0	0	0	0	0	0.9004	0	0	0	0	0	0	0	0	1.6443	0	0	0	0	0	0	0.7767	0	0	0	0	0	0	0	0.782	0	0	0	0	0
AC002066.1	1.2806	2.9088	0.9374	0	4.21	14.9063	0	4.1686	0	1.7919	9.4813	4.3688	4.5512	2.639	0	1.1239	0	0.7664	0	1.8008	7.3202	0	3.7467	5.5126	0	7.7424	1.8263	10.2046	4.9328	3.2476	4.5383	2.8533	0	0	2.934	7.767	0.9933	4.4558	4.3409	3.1454	3.5982	11.6857	6.5631	3.9099	2.6193	0.7983	1.364	5.3694	5.9282
AC002069.5	2.5612	2.9088	0	0	4.21	0	0	1.0421	2.8984	0	2.7089	0	1.1378	0	1.9933	0	1.3187	0	0	0.9004	0	1.7673	0	0.9188	0	0	0.9132	0	0.8221	1.0825	0	0	0	0	0.978	0	0	1.7823	0	0	0	0.779	0.9376	3.1279	2.6193	0	0	0	0
AC002069.6	2.5612	0	0	0	0	0	0	0	0	0	1.3545	0	0	0	0.9967	0	0	0.7664	1.0172	0	2.0915	0.8836	0.9367	1.8375	2.5411	0	0	0	0	0	0	0	0	0.798	0	0	0	0	0	0	0.8995	0	0	0	0.8731	0	0	0	0
AC002070.1	0	0	0	0	0	0	0	0	0	0	0	0	0	0	0	0	0	0	0	0	0	0	0	0	0	0	0	0	0	0	0	0	0	0	0	0	0	0	0	0	0	0	0	0	0	0	0	0	0
AC002075.3	5.1224	49.449	7.4988	11.1215	23.8568	17.3906	0	0	4.8307	12.5433	21.6715	6.5532	11.378	9.2364	12.9567	1.1239	31.6493	6.8977	7.1207	10.8045	15.6862	6.1854	16.86	10.1064	15.2468	9.0328	25.5689	3.8267	15.6207	6.4952	6.3536	0	0	8.7784	19.5603	17.0873	8.9396	0	2.713	18.0859	0.8995	0	13.1261	3.1279	0	0	3.4101	14.5742	0
AC002075.4	8.9641	11.6351	4.6868	5.5607	8.42	8.6953	0	2.0843	5.7968	16.1271	17.6081	6.5532	6.8268	3.9585	12.9567	8.9914	21.0995	4.5985	5.0862	11.7049	13.5947	1.7673	0.9367	7.3501	6.3528	5.1616	6.3922	3.8267	2.4664	4.3302	6.3536	1.9022	0.9605	4.7882	4.8901	4.6602	0.9933	0	2.713	6.2907	0	0.779	11.251	0	0	0	1.364	6.1365	0
AC002076.10	0	0	1.8747	0	4.21	0	0	0	0.9661	0	0	3.2766	1.1378	0	0.9967	1.1239	5.2749	1.5328	1.0172	0.9004	0	0	0.9367	4.5938	5.0823	1.2904	4.5659	0	0.8221	1.0825	0.9077	0.9511	0	0	3.9121	5.4369	0	0	0.5426	0.7863	1.7991	0	0.9376	0	0	0	0.682	0.7671	0
AC002115.5	0	0	0	0	0	0	0	0	0	0	0	0	0	0	0	0	0	0	0	0	0	0	0	0	0	0	0	0	0	0	0	0	0	0	0	0	0	0	0	0	0	0	0	0	0	0	0	0	0
AC002115.9	0	0	0	0	0	0	0	0	0	0	0	0	0	0	0	0	0	0	0	0	0	0	0	0	0	0	0	0	0.8221	0	0	0	0	0	0	0	0	0	0	0	0	0	0	0	0	0	0	0	0
AC002116.7	5.1224	0	0.9374	0	7.0167	1.2422	11.5269	2.0843	0.9661	8.9595	1.3545	1.0922	3.4134	3.9585	2.99	2.2479	7.9123	0	2.0345	0.9004	0	0.8836	1.8733	0.9188	5.0823	6.452	2.7395	2.5512	1.6443	1.0825	1.8153	1.9022	0	1.5961	1.956	6.2136	0	4.4558	4.3409	2.359	3.5982	4.6743	0	1.564	0	5.588	0.682	0.7671	0
AC002116.8	0	0	0	16.6822	0	0	5.7634	0	0	0	0	0	0	0	0	11.2393	0	19.1602	0	61.2256	0	2.6509	12.1767	0	2.5411	0	0	0	0	0	0	0	0	0	0	1.5534	0	20.4968	0	0	0	8.5695	0	0	5.2387	32.7296	0	3.0683	35.5694
AC002117.1	1.2806	37.814	3.7494	1.1121	2.8067	14.9063	0	6.2529	0.9661	1.7919	13.5447	2.1844	4.5512	1.3195	7.9733	2.2479	7.9123	1.5328	1.0172	1.8008	0	3.5345	0	9.1876	0	6.452	2.7395	3.8267	4.1107	4.3302	1.8153	3.8044	3.8421	1.5961	0.978	3.8835	0.9933	0	0	0.7863	2.6986	2.3371	9.3758	0	0	1.5966	0.682	0	0
AC002127.2	0	0	0	0	0	0	2.8817	0	0	0	0	0	0	0	0	0	0	0	0	0	0	0	0	0	0	0	0	0	0	0	0	0	0	0	0	0	0	0	0	0	0	0	0	0	0	0	0	0	0
AC002127.4	0	0	0	0	0	0	0	0	0	0	0	0	0	0	0	0	0	0	0	0	0	0	0.9367	0	0	0	0	0	0.8221	0	0	0	0	0	0	0	0	0	0	0	0	0	0	0	0	0	0	0	0
AC002128.5	20.4894	17.4526	3.7494	15.5701	11.2267	6.2109	0	7.295	1.9323	3.5838	24.3804	4.3688	10.2402	15.8339	9.9667	14.6111	22.4182	11.4961	7.1207	9.0038	5.2287	11.4872	5.62	14.7002	6.3528	15.4848	5.479	5.1023	4.9328	4.3302	1.8153	1.9022	3.8421	2.3941	2.934	3.1068	0	6.2381	5.9687	6.2907	4.4977	3.8952	0	5.4739	0.8731	8.7811	8.1843	1.5341	5.9282
AC002306.1	30.7342	2.9088	3.7494	6.6729	2.8067	6.2109	0	4.1686	2.8984	5.3757	5.4179	8.7376	10.2402	1.3195	10.9634	6.7436	7.9123	8.4305	3.0517	10.8045	3.1372	9.7199	7.4933	7.3501	6.3528	3.8712	10.9581	3.8267	2.4664	6.4952	4.5383	5.7067	6.7236	2.3941	6.8461	0.7767	1.9866	1.7823	1.6278	0.7863	1.7991	3.8952	7.5006	4.6919	0.8731	8.7811	6.8202	6.1365	0
AC002310.10	5.1224	0	2.8121	5.5607	2.8067	2.4844	0	2.0843	1.9323	1.7919	1.3545	4.3688	1.1378	1.3195	2.99	1.1239	9.231	3.0656	4.069	4.5019	3.1372	6.1854	0.9367	3.6751	2.5411	1.2904	4.5659	6.3779	0	3.2476	0	3.8044	0.9605	3.1921	0	2.3301	0.9933	2.6735	2.713	1.5727	3.5982	0.779	2.8127	1.564	2.6193	1.5966	0	3.0683	0
AC002310.12	14.0865	31.9964	19.6844	11.1215	14.0334	12.4219	8.6452	10.4215	0.9661	17.919	13.5447	16.3831	5.689	9.2364	15.9467	23.6025	10.5498	15.3282	13.2242	17.1072	18.8235	10.6036	4.6833	11.0252	5.0823	25.808	17.3503	24.236	9.8657	14.073	15.4301	15.2178	5.7631	9.5764	5.8681	22.5242	6.953	10.694	15.7357	18.0859	3.5982	9.3486	15.0013	7.8198	15.7161	12.7725	11.5944	10.7389	5.9282
AC002310.13	0	0	0	0	0	0	14.4086	0	2.8984	0	0	0	1.1378	0	0	0	0	9.9633	3.0517	14.406	0	3.5345	0	0	0	0	3.6527	0	0	0	1.8153	0	1.921	0	0	0	0	8.0205	1.6278	0	0	0	0	0	0.8731	5.588	1.364	0	142.278
AC002310.14	8.9641	26.1789	23.4338	25.5794	37.8902	47.2031	63.3978	30.2223	32.8484	43.0055	14.8992	22.9363	52.3387	21.1118	31.8934	29.2222	15.8246	45.2181	24.414	94.5396	23.0065	27.3926	16.86	26.6441	24.1408	16.7752	23.7425	29.3383	14.7985	17.3206	19.0608	14.2667	18.2498	22.345	51.8348	24.0776	39.7316	90.0076	41.7809	25.9493	18.8905	17.9181	20.6267	24.2413	36.6709	66.2576	26.5989	31.4496	918.876
AC002310.17	0	0	0	0	1.4033	1.2422	0	0	0	7.1676	0	4.3688	1.1378	0	0.9967	0	0	0	1.0172	0.9004	0	0.8836	0.9367	0.9188	0	0	0	0	0.8221	0	0	0.9511	0	0.798	1.956	0	0	0	0.5426	0	1.7991	0.779	0	0.782	0	0.7983	0.682	0	0
AC002310.7	3.8418	8.7263	0	5.5607	7.0167	2.4844	109.505	0	5.7968	12.5433	1.3545	0	0	0	4.9833	0	0	0	7.1207	27.9117	8.366	0	0	0	6.3528	1.2904	3.6527	0	1.6443	2.1651	1.8153	0	0	1.5961	0	1.5534	0	12.4763	8.6817	5.5044	2.6986	3.8952	0	7.8198	1.7462	7.9828	1.364	6.1365	136.349
AC002314.4	0	0	0	0	0	0	0	0	0	0	0	0	0	0	0	0	0	0	0	0	0	0	0	0	0	0	0	0	0	0	0	0	0	0	0	0	0	0	0	0	0	0	0	0	0	0	0	0	0
AC002331.1	0	0	0	0	0	0	0	0	0	0	0	0	0	0	0	0	0	0	0	0	0	0.8836	0	0	0	0	0	0	0	0	0	0	0	0	0	0	0	0	0	0	0	1.5581	0	0	0	0	0	0	0
AC002365.5	15.3671	40.7227	5.6241	15.5701	19.6468	28.5703	0	2.0843	6.7629	12.5433	10.8357	22.9363	14.7914	9.2364	6.9767	11.2393	6.5936	3.832	6.1035	9.0038	6.2745	8.8363	21.5433	11.9439	3.8117	21.9368	2.7395	7.6535	2.4664	12.9905	19.0608	7.6089	5.7631	3.9902	0.978	6.2136	0	1.7823	3.2557	1.5727	8.0959	2.3371	15.0013	0.782	3.4925	0.7983	8.8663	4.6024	0
AC002366.3	48.6624	20.3614	12.1856	33.3644	40.6969	26.0859	14.4086	6.2529	35.7468	8.9595	16.2536	15.2909	20.4804	19.7923	43.8534	37.0897	32.968	24.5251	16.276	15.3064	14.6405	30.9271	22.48	28.4816	20.3291	23.2272	18.2635	31.8895	11.51	21.6508	23.599	31.3867	11.5262	9.5764	10.7582	11.6505	19.8658	6.2381	26.5878	14.9405	10.7946	13.2438	4.6879	22.6774	7.858	13.5708	12.9585	3.0683	11.8565
AC002368.4	0	2.9088	0	1.1121	0	1.2422	0	0	1.9323	0	1.3545	0	1.1378	1.3195	0.9967	1.1239	9.231	4.5985	1.0172	0.9004	4.183	0	0	0	0	2.5808	0	0	2.4664	1.0825	0	1.9022	0	0	2.934	0	0	0	0.5426	0	0	0	0	2.3459	0	0	0	0	0
AC002383.2	0	0	0	0	1.4033	1.2422	0	0	0	0	0	0	0	0	0	0	0	0	0	0	0	0	0	0	0	0	0	0	0	0	0	0	0	0	0	0	0	0	0	0	0	0	0	0	0	0	0	0	0
AC002386.1	0	0	0	0	0	0	0	0	0	0	0	0	0	0	0.9967	0	0	0.7664	0	0	0	0.8836	0	0	0	0	0	0	0	0	0	0	0	0	0	0	0	0	0	0	0	0	0	0	0	0	0	0	0
AC002395.1	2.5612	0	0	0	0	0	0	0	0	0	1.3545	0	0	0	0	0	0	0.7664	0	0	0	0	0	0	0	0	0	0	0	0	0	0	0.9605	0	0	0	0	0	0	0	0	0	0	0	0	0	0	0	0
AC002398.11	15.3671	5.8175	5.6241	10.0093	14.0334	13.6641	17.2903	11.4636	2.8984	5.3757	4.0634	5.461	7.9646	2.639	12.9567	7.8675	9.231	7.6641	5.0862	19.8083	7.3202	10.6036	2.81	21.1315	7.6234	12.904	10.9581	11.4802	7.3993	2.1651	7.2612	0.9511	5.7631	7.9803	4.8901	5.4369	11.9195	12.4763	6.5113	5.5044	6.2968	2.3371	3.7503	0	4.3656	25.5451	8.1843	6.9036	5.9282
AC002398.12	98.6054	49.449	108.733	14.4579	28.0668	81.9844	0	4.1686	3.8645	50.1731	182.853	22.9363	14.7914	36.9457	50.8301	56.1965	3.9562	32.9556	33.5692	6.3026	23.0065	31.8107	0	901.306	0	130.33	24.6557	99.4951	13.1542	19.4857	0	0	155.603	81.3996	48.9007	0	0	0	0	4.718	0	65.4399	130.323	16.4216	2.6193	0	0	5.3694	0
AC002398.13	0	11.6351	5.6241	0	7.0167	0	5.7634	4.1686	0	10.7514	8.1268	0	0	2.639	0	1.1239	0	2.2992	4.069	3.6015	5.2287	7.069	1.8733	3.6751	0	0	0	5.1023	4.9328	3.2476	0	0	0	3.9902	1.956	0	0	0	0	0	0	0	1.8752	5.4739	3.4925	0	2.0461	3.0683	0
AC002398.9	0	0	5.6241	0	12.6301	0	0	0	0	0	0	0	7.9646	0	2.99	0	0	15.3282	1.0172	0	6.2745	11.4872	18.7333	0	21.5997	0	12.7844	0	0	0	11.7995	24.7289	0	0	0	0	9.9329	0	4.8835	0	10.7946	7.0114	17.814	0.782	1.7462	0	0	5.3694	0
AC002400.1	81.9577	40.7227	67.4893	32.2523	50.5203	165.211	2.8817	28.138	66.663	48.3812	167.954	141.987	72.8191	55.4185	54.8168	37.0897	61.9798	42.1525	54.9314	58.5245	59.6077	35.3452	76.8066	97.3888	67.3401	114.846	46.5719	62.5033	50.9727	53.0444	53.5517	74.1867	35.5391	51.8723	49.8787	52.8154	26.8188	27.6261	34.727	32.24	30.5846	88.8113	69.3809	21.8954	49.7676	14.3691	32.7371	44.4896	0
AC002401.1	2.5612	0	0	0	1.4033	0	0	1.0421	0	3.5838	1.3545	1.0922	0	2.639	3.9867	2.2479	0	4.5985	2.0345	6.3026	1.0457	0	0	0.9188	0	7.7424	0.9132	2.5512	0.8221	2.1651	2.723	1.9022	0.9605	0	0	0	4.9664	0	5.9687	0	0	0	0	0	0	0	0	0	0
AC002407.1	0	0	0	0	0	0	0	0	0	0	0	0	0	0	0	0	0	0	0	0	0	0	0	0	0	0	0	0	0	0	0	0	0	0	0	0	0	0	0	0	0	0	0	0	0	0	0	0	0
AC002429.4	1.2806	0	0	0	1.4033	3.7266	0	0	0.9661	0	1.3545	0	1.1378	0	0.9967	2.2479	2.6374	0.7664	1.0172	0	0	0	4.6833	0.9188	2.5411	1.2904	0	3.8267	0	0	0	0.9511	0	0	0	0.7767	0	0.8912	0	0	0	0.779	0	0.782	0	0	0	0.7671	0
AC002429.5	69.1518	282.15	54.3664	64.5045	26.6635	105.586	57.6344	75.0346	31.8823	16.1271	54.1787	68.8088	200.252	21.1118	68.7701	57.3204	129.235	40.6196	180.053	43.2181	65.8822	40.647	63.6933	58.8008	111.81	110.974	32.8743	54.8499	21.3757	73.6126	41.7521	47.5556	15.3682	81.3996	47.9227	34.1747	58.6041	132.783	14.6504	78.6342	44.0778	60.7656	141.575	43.7908	29.6859	7.1846	51.8338	40.6543	0
AC002451.3	1.2806	2.9088	3.7494	1.1121	1.4033	9.9375	0	8.3372	2.8984	3.5838	6.7723	4.3688	5.689	6.5974	5.98	4.4957	5.2749	14.5618	1.0172	9.9041	2.0915	6.1854	0	13.7814	8.894	21.9368	3.6527	19.1337	5.755	11.9079	0.9077	7.6089	2.8815	2.3941	6.8461	3.1068	3.9732	3.5647	9.2244	8.6498	4.4977	7.7905	4.6879	4.6919	7.858	3.9914	9.5483	2.3012	0
AC002454.1	0	0	0.9374	1.1121	0	0	0	0	0	0	1.3545	0	2.2756	0	0	0	0	2.2992	2.0345	0	0	0.8836	0.9367	0	0	0	1.8263	0	0	1.0825	1.8153	0	0	0	1.956	0	0	0.8912	0	0.7863	0	0	4.6879	0	0	1.5966	0.682	0.7671	0
AC002456.2	6.4029	0	1.8747	0	1.4033	1.2422	0	9.3793	0.9661	0	2.7089	0	2.2756	1.3195	0.9967	1.1239	1.3187	0.7664	0	2.7011	0	0	0	0.9188	0	1.2904	2.7395	3.8267	0	0	0	0	0	1.5961	0.978	1.5534	0	0	1.6278	0	0	0.779	2.8127	1.564	1.7462	1.5966	0.682	3.8353	0
AC002463.3	0	0	0	0	0	0	0	0	0	0	0	0	0	0	0	0	0	0	0	0	0	0	0	0	0	1.2904	0	0	0	0	0	0	0	0	0	0	0	0	0	0	0	0	0	0	0	0	0	0	0
AC002465.2	0	0	0	0	0	0	0	0	0	0	0	0	0	0	0	0	0	0	0	0	0	0	0	0	0	0	0	0	0	0	0	0	0	0	0	0	0	0	0	0	0	0	0	0	0	0	0	0	0
AC002467.7	2.5612	5.8175	2.8121	2.2243	4.21	3.7266	11.5269	13.5479	14.492	8.9595	1.3545	6.5532	7.9646	1.3195	4.9833	2.2479	9.231	4.5985	7.1207	6.3026	1.0457	4.4182	7.4933	0	1.2706	6.452	1.8263	1.2756	7.3993	5.4127	7.2612	10.4622	7.6841	10.3745	5.8681	4.6602	9.9329	1.7823	4.8835	3.1454	8.9955	9.3486	4.6879	5.4739	5.2387	7.9828	9.5483	10.7389	0
AC002472.11	0	2.9088	0.9374	0	0	0	0	0	0	0	0	0	0	0	0	1.1239	0	0	0	0	0	0.8836	0	0	0	0	0	0	0	0	0	0	0	0	0	0	0	0	0	0	0	0	0	0	0	0	0	0	0
AC002480.3	12.8059	2.9088	5.6241	23.3551	4.21	3.7266	0	4.1686	3.8645	10.7514	40.634	7.6454	10.2402	9.2364	4.9833	2.2479	11.8685	0	14.2415	6.3026	2.0915	14.1381	25.29	41.3443	181.691	11.6136	8.2186	5.1023	10.6878	6.4952	4.5383	52.3111	5.7631	4.7882	5.8681	7.767	10.9262	0.8912	9.2244	10.2224	26.9864	15.5809	1.8752	1.564	4.3656	13.5708	5.4562	6.9036	0
AC002480.4	1.2806	0	0	1.1121	0	0	0	3.1264	0	1.7919	4.0634	1.0922	2.2756	1.3195	0	1.1239	1.3187	0	5.0862	1.8008	0	0	2.81	5.5126	8.894	0	2.7395	1.2756	0.8221	4.3302	0	2.8533	1.921	1.5961	0.978	3.8835	0.9933	0.8912	1.6278	3.9317	3.5982	3.1162	2.8127	0	0	1.5966	0.682	0	0
AC002486.2	0	0	0	0	0	6.2109	0	0	0	0	0	0	0	0	0	0	0	0	0	3.6015	0	0	0	0	0	0	0	0	0	0	0	0	0	0	0.978	0	0	0	0	0	0	0	0	0	0	0	0	0	0
AC002486.3	0	0	0	0	0	2.4844	0	0	0	0	0	0	0	1.3195	0	0	0	0	0	3.6015	0	0	0	0.9188	0	1.2904	0	0	0.8221	0	0	0	0	0	0.978	0.7767	0	0	0	0	0	0	0	0	0	3.1931	0	0	0
AC002511.2	1.2806	0	0.9374	0	4.21	1.2422	0	0	0	1.7919	24.3804	1.0922	0	0	0.9967	1.1239	3.9562	0.7664	0	3.6015	0	2.6509	7.4933	2.7563	0	1.2904	1.8263	1.2756	0	0	0.9077	0	2.8815	0.798	1.956	0.7767	0	0.8912	0.5426	0	0	0	0	0	0	0.7983	0	3.8353	0
AC002511.3	1.2806	0	2.8121	4.4486	14.0334	2.4844	0	0	0	0	13.5447	2.1844	0	1.3195	1.9933	2.2479	0	1.5328	0	6.3026	0	3.5345	5.62	0.9188	0	2.5808	2.7395	3.8267	1.6443	1.0825	0.9077	0.9511	4.8026	2.3941	1.956	0	0	0	2.1704	0.7863	1.7991	0	0	0	5.2387	3.1931	1.364	3.0683	0
AC002519.6	0	0	0	4.4486	2.8067	0	0	1.0421	0	0	1.3545	2.1844	0	0	0.9967	2.2479	1.3187	1.5328	2.0345	0	0	0	0	0	0	0	1.8263	0	0	2.1651	0	0	0	0	0	0.7767	0	0	0	0.7863	0	0	2.8127	0	0	0	0.682	0.7671	0
AC002519.8	8.9641	2.9088	2.8121	4.4486	8.42	7.4531	0	8.3372	24.1533	14.3352	14.8992	3.2766	15.9292	3.9585	6.9767	6.7436	2.6374	7.6641	10.1725	0.9004	18.8235	7.069	4.6833	5.5126	5.0823	15.4848	11.8713	6.3779	2.4664	7.5778	9.0766	4.7556	3.8421	2.3941	0.978	3.8835	2.9799	15.1498	3.2557	3.9317	8.9955	3.1162	4.6879	2.3459	13.9699	2.3949	3.4101	2.3012	0
AC002523.1	0	0	0	0	0	0	0	0	0	0	0	0	0	0	0	0	0	0	0	0	0	0	0	0	0	0	0	0	0	0	0	0	0	0	0	0	0	0	0	0	0	0	0	0	0	0	0	0	0
AC002539.1	7.6835	5.8175	0.9374	6.6729	8.42	16.1484	5.7634	0	2.8984	0	12.1902	6.5532	5.689	9.2364	14.95	20.2307	15.8246	5.3649	8.138	2.7011	3.1372	17.6726	4.6833	14.7002	7.6234	23.2272	6.3922	15.3069	2.4664	6.4952	9.0766	9.5111	0	0	0.978	0.7767	2.9799	0.8912	8.1391	2.359	4.4977	2.3371	2.8127	7.8198	0.8731	0.7983	2.0461	0	0
AC002539.2	0	0	0	0	0	0	0	0	0	0	0	0	0	0	0	0	0	0	0	0	0	0	0	0	0	0	0	0	0	0	0	0	0	0	0	0	0	0	0	0	0	0	0	0	0	0	0	0	0
AC002542.2	5.1224	11.6351	0.9374	1.1121	0	3.7266	0	0	0	0	4.0634	3.2766	2.2756	0	0	1.1239	1.3187	0	0	0	0	0	3.7467	0.9188	6.3528	0	0	0	0	1.0825	0	2.8533	2.8815	0	0.978	0	0	0	3.2557	0	0	0	0.9376	0.782	0	0	0	0	0
AC002543.2	210.017	104.716	43.1182	55.6073	56.1336	196.266	11.5269	75.0346	72.4598	73.4678	96.1672	114.681	176.359	59.377	76.7435	44.9572	175.39	44.4517	49.8452	52.2219	102.483	59.2033	63.6933	82.6886	85.128	129.04	68.4881	45.9208	37.8185	41.1364	59.9053	42.8	12.4867	29.5273	72.3731	89.3202	36.7517	45.4494	39.0678	21.2312	40.4796	103.613	64.693	39.0989	54.1332	12.7725	40.9214	48.325	5.9282
AC002550.5	8.9641	0	2.8121	0	7.0167	4.9688	0	7.295	9.6613	10.7514	0	7.6454	2.2756	0	0	0	9.231	3.0656	2.0345	1.8008	0	2.6509	0	4.5938	12.7057	0	0	0	9.8657	0	2.723	0	0	7.1823	3.9121	8.5437	3.9732	5.347	0	5.5044	0	3.8952	0	22.6774	13.9699	0	2.7281	3.8353	0
AC002550.6	12.8059	17.4526	11.2482	7.785	2.8067	6.2109	0	1.0421	5.7968	0	6.7723	1.0922	3.4134	3.9585	3.9867	5.6197	10.5498	3.832	7.1207	1.8008	5.2287	3.5345	2.81	11.9439	2.5411	15.4848	5.479	6.3779	5.755	8.6603	0.9077	3.8044	0.9605	7.9803	5.8681	6.2136	2.9799	3.5647	3.2557	4.718	5.3973	10.9066	10.3134	4.6919	1.7462	0.7983	0.682	7.6706	0
AC002551.1	17.9283	5.8175	5.6241	7.785	12.6301	6.2109	0	2.0843	4.8307	10.7514	10.8357	8.7376	3.4134	5.278	11.96	7.8675	17.1434	6.1313	3.0517	4.5019	3.1372	7.069	1.8733	4.5938	10.1645	3.8712	4.5659	6.3779	1.6443	4.3302	0	1.9022	1.921	3.1921	0.978	0.7767	2.9799	2.6735	4.8835	3.9317	0.8995	1.5581	4.6879	5.4739	2.6193	3.1931	4.0921	4.6024	0
AC002553.4	2.5612	20.3614	2.8121	4.4486	4.21	6.2109	0	3.1264	4.8307	5.3757	6.7723	0	5.689	5.278	6.9767	5.6197	6.5936	3.832	3.0517	5.4023	4.183	2.6509	4.6833	1.8375	7.6234	15.4848	7.3054	6.3779	1.6443	5.4127	3.6306	5.7067	0.9605	4.7882	7.8241	6.2136	3.9732	2.6735	2.713	3.1454	5.3973	5.4533	4.6879	0.782	4.3656	0	2.0461	0.7671	0
AC002558.1	0	0	0	0	0	0	0	0	0	0	0	0	0	0	0	0	0	0	0	0	0	0	0	0	0	0	0	0	0	0	0	0	0	0	0	0	0	0	0	0	0	0	0	0	0	0	0	0	0
AC002978.1	0	0	0	0	0	0	0	0	0	0	0	0	0	0	0	0	0	0	0	0	0	0	0	0	0	0	0	0	0	0	0	0	0	0	0	0	0	0	0	0	0	0	0	0	0	0	0	0	0
AC002979.1	0	0	0	0	0	0	0	0	0	0	0	0	0	0	0	0	0	0	0	0	0	0	0	0	0	0	0	0	0	0	0	0	0	0	0	0	0	0	0	0	0	0	0	0	0	0	0	0	0
AC002981.1	0	0	0	0	0	0	0	0	0	0	0	0	0	0	0	0	0	0	0	0	0	0	0	0	0	0	0	0	0	0	0	0	0	0	0	0	0	0	0	0	0	0	0	0.782	0	0	0	0	0
AC002984.2	7.6835	2.9088	5.6241	4.4486	5.6134	8.6953	5.7634	4.1686	5.7968	16.1271	2.7089	37.1349	4.5512	10.5559	5.98	4.4957	22.4182	1.5328	13.2242	0	6.2745	11.4872	19.67	16.5377	26.6819	6.452	1.8263	10.2046	4.9328	8.6603	3.6306	2.8533	9.6052	3.9902	1.956	0.7767	9.9329	2.6735	4.3409	3.1454	4.4977	3.1162	0	3.9099	4.3656	3.1931	0.682	1.5341	0
AC002985.3	0	0	0	0	5.6134	0	0	0	0	0	0	0	0	2.639	0	0	0	0	0	0	0	0	0	0	0	0	0	0	1.6443	0	0	0	0	0	0	0	0	0	0	0	0	0	0	0	0	0	0	0	0
AC003001.1	0	0	0	0	0	0	0	0	0	0	0	0	0	0	0	0	0	0	0	0.9004	0	0	0	0	0	0	0	0	0	0	0	0	0	0	0	0	0	0	0	0	0	0	0	0	0	0	0	0	0
AC003002.4	0	0	0	0	0	0	0	1.0421	0	0	0	0	0	2.639	0	0	0	5.3649	0	0	0	0	0	0	0	0	0	0	0	0	0	0	0.9605	0	0	0	0	0	0	0	0	0	0	0.782	0	0	0	0	35.5694
AC003002.6	3.8418	0	4.6868	2.2243	4.21	0	5.7634	1.0421	7.729	1.7919	1.3545	0	10.2402	7.9169	3.9867	5.6197	1.3187	10.7297	7.1207	14.406	4.183	1.7673	7.4933	3.6751	3.8117	2.5808	2.7395	1.2756	2.4664	3.2476	1.8153	0.9511	1.921	3.9902	0.978	1.5534	8.9396	4.4558	2.1704	1.5727	16.1918	4.6743	0.9376	7.0378	5.2387	7.9828	6.1382	3.0683	0
AC003005.2	0	14.5438	0.9374	0	2.8067	1.2422	0	0	1.9323	10.7514	0	2.1844	0	0	0.9967	1.1239	0	3.0656	1.0172	0	0	0	0	1.8375	0	0	0	1.2756	0.8221	0	0	1.9022	0	0	0.978	0	0	0.8912	0	1.5727	0.8995	0	0.9376	0	0	0.7983	0.682	2.3012	0
AC003005.4	8.9641	11.6351	4.6868	1.1121	8.42	7.4531	23.0537	11.4636	17.3903	0	2.7089	10.922	1.1378	31.6677	6.9767	6.7436	7.9123	4.5985	8.138	6.3026	15.6862	0	0	22.0503	24.1408	10.3232	11.8713	7.6535	0	0	5.4459	12.3645	18.2498	6.3843	10.7582	1.5534	4.9664	8.0205	4.8835	3.9317	0	3.1162	0	1.564	8.7312	4.7897	4.0921	6.9036	0
AC003006.1	0	0	0	0	0	0	0	0	0	0	0	0	0	0	0	0	0	0	0	0	0	0	0	0	0	0	0	0	0	0	0	0	0	0	0	0	0	0	0	0	0	0	0	0	0	0	0	0	0
AC003006.7	0	0	0	6.6729	0	0	14.4086	0	0	3.5838	0	5.461	0	3.9585	0	8.9914	0	8.4305	5.0862	13.5057	0	0	2.81	6.4313	2.5411	0	0.9132	0	0	2.1651	0	0	0	5.5862	2.934	0	0.9933	3.5647	8.1391	7.0771	0	1.5581	0	5.4739	5.2387	19.9571	0	0	17.7847
AC003009.1	0	0	0	0	0	0	0	0	0	0	1.3545	0	0	0	1.9933	0	0	0	0	0	0	0.8836	0	0.9188	0	0	0.9132	0	0	0	0	1.9022	0	0	0	0	0	0	0	0	0	0	0	0	0	0	0	0.7671	0
AC003045.1	0	0	0	0	0	0	0	0	0	0	0	0	0	0	0	0	0	0	0	0	0	0	0	0	0	0	0	0	0	0	0	0	0	0	0	0	0	0	0	0	0	0	0	0	0	0	0	0	0
AC003075.4	39.6983	8.7263	14.0603	30.028	7.0167	1.2422	129.677	12.5058	14.492	73.4678	10.8357	19.6597	6.8268	22.4313	5.98	6.7436	19.7808	19.9266	8.138	36.9155	10.4575	8.8363	27.1633	5.5126	26.6819	5.1616	7.3054	2.5512	8.2214	2.1651	9.0766	12.3645	7.6841	13.5666	4.8901	9.3204	8.9396	10.694	14.6504	9.4361	2.6986	1.5581	0.9376	12.5117	8.7312	42.309	8.8663	3.0683	142.278
AC003080.4	44.8206	17.4526	12.1856	42.2616	28.0668	16.1484	11.5269	26.0537	14.492	8.9595	33.8617	22.9363	15.9292	27.7092	12.9567	22.4786	21.0995	19.1602	24.414	24.3102	17.7777	15.0217	16.86	22.9691	22.8702	38.712	29.2216	30.6139	26.3085	20.5682	16.3378	35.1911	33.618	18.3548	22.4943	27.9611	24.8322	15.1498	14.1078	23.5902	41.3792	38.9523	9.3758	12.5117	16.5892	25.5451	23.8708	13.0401	5.9282
AC003084.2	0	0	0	0	0	1.2422	0	6.2529	0.9661	0	2.7089	0	0	0	0	1.1239	0	0	3.0517	0	0	0	0	0	0	1.2904	0.9132	0	0	0	0.9077	0	0	0	0	0	0	0	0	0	0	0	0	0	0	0	0	0	0
AC003088.1	1.2806	0	0	0	0	0	0	0	0.9661	0	0	0	0	1.3195	0	0	0	0	0	0	1.0457	0.8836	0	0	2.5411	0	0	0	0	1.0825	0	0	2.8815	0.798	3.9121	0	0	0	0	0	0.8995	0	1.8752	0	0	0.7983	0	0	0
AC003090.1	14.0865	11.6351	2.8121	8.8972	4.21	0	0	72.9503	1.9323	32.2542	1.3545	86.2841	3.4134	1.3195	2.99	4.4957	5.2749	0.7664	7.1207	1.8008	2.0915	17.6726	1.8733	19.294	6.3528	2.5808	10.9581	8.929	2.4664	6.4952	3.6306	2.8533	9.6052	37.5076	3.9121	2.3301	9.9329	1.7823	4.3409	15.7268	8.0959	5.4533	4.6879	0.782	81.1998	0.7983	6.8202	2.3012	5.9282
AC003092.1	1.2806	0	0	2.2243	1.4033	0	0	36.4751	0	0	66.3689	6.5532	0	5.278	0	0	1.3187	0	0	0	0	0	0.9367	0	5.0823	0	0.9132	0	4.9328	0	26.322	0.9511	0	0	0	5.4369	0.9933	0.8912	4.8835	0	0	0	0	1.564	0	0	0	98.184	0
AC003092.2	0	0	0	0	0	0	0	0	0	0	1.3545	1.0922	0	0	0	0	0	0	0	0	0	0	0	0.9188	1.2706	0	0	0	0.8221	0	0	0	0.9605	0	0	0	0	0	0	0	0	0	0	0	0	0.7983	0	1.5341	0
AC003101.1	1.2806	0	0.9374	0	2.8067	4.9688	17.2903	1.0421	0.9661	1.7919	1.3545	3.2766	4.5512	1.3195	0	2.2479	5.2749	3.832	2.0345	0.9004	1.0457	2.6509	0.9367	3.6751	0	3.8712	3.6527	0	4.1107	5.4127	2.723	1.9022	1.921	0.798	0.978	2.3301	2.9799	0	2.1704	0	0.8995	1.5581	0	0.782	0	3.9914	0	0	0
AC003104.1	94.7636	43.6315	39.3688	27.8037	40.6969	62.1094	11.5269	22.9272	35.7468	37.6299	85.3315	50.2414	32.9961	38.2651	51.8268	55.0726	71.2109	31.4227	57.9832	12.6053	42.8757	33.578	25.29	99.2264	41.9287	89.0375	56.6168	63.7789	36.9963	21.6508	48.1057	49.4578	43.2232	31.9214	36.1865	41.9416	47.6779	19.6056	41.7809	24.3766	53.0733	46.7428	51.5669	29.7152	25.3204	29.5365	26.5989	15.3413	0
AC003658.1	0	0	0	0	0	0	0	0	0	0	0	0	0	0	0	0	0	0	0	0	0	0	0	0	0	0	0	0	0	0	0	0	0	0	0	0	0	0	0	0	0	0	0	0	0	0	0	0	0
AC003664.1	0	0	0	0	0	0	0	0	0	0	0	0	0	0	0	0	0	0	0	0	0	0	0	0	0	0	0	0	0	0	0	0	0	0	0	0	0	0	0	0	0	0	0.9376	0	0	0	0	0	0
AC003666.1	0	0	0	0	0	0	0	0	0	0	0	0	0	0	0	0	0	0	0	0	0	0	0	0	0	0	0	0	0	0	0	0	0	0	0	0	0	0	0	0	0	0	0	0	0	0	0	0	0
AC003681.1	0	0	0	0	0	0	0	0	0	0	0	0	0	0	0	0	0	0	0	0	0	0	0	0	0	0	0	0	0	0	0	0	0	0	0	0	0	0	0	0	0	0	0	0	0	0	0	0	0
AC003682.16	3.8418	0	7.4988	1.1121	1.4033	1.2422	2.8817	0	1.9323	5.3757	1.3545	2.1844	3.4134	2.639	0	2.2479	0	1.5328	1.0172	0.9004	4.183	0.8836	0	1.8375	1.2706	1.2904	4.5659	3.8267	1.6443	2.1651	0.9077	0.9511	2.8815	0.798	0.978	0	1.9866	0.8912	1.6278	0.7863	1.7991	0.779	0	0	0	0	3.4101	1.5341	0
AC003682.17	2.5612	0	0	0	0	27.3281	0	3.1264	5.7968	3.5838	0	4.3688	4.5512	0	0.9967	0	2.6374	0	2.0345	78.3328	7.3202	0.8836	3.7467	5.5126	17.7879	12.904	0	7.6535	1.6443	0	0	19.9733	4.8026	0.798	1.956	1.5534	0	0	2.1704	0	0	0.779	1.8752	0	0	9.5794	0	0	0
AC003956.1	0	0	0.9374	0	1.4033	0	0	0	0	0	0	0	1.1378	0	0	0	0	0	0	0	0	0	0	0	0	0	0	0	0	0	0	0	0	1.5961	0	3.1068	0	0.8912	0	0	0	0.779	0	0	0	0	0.682	0.7671	0
AC003958.2	0	0	0	0	0	0	0	0	0	0	1.3545	0	0	0	0	0	0	2.2992	0	0.9004	0	0	0	0	0	0	0	1.2756	2.4664	0	0	0.9511	0	0.798	0	0.7767	0	0	0	0	1.7991	0	0	0	0	0	0	0	0
AC003958.6	0	0	0	0	0	0	0	0	0	0	0	0	0	0	0	0	0	0	0	0	0	0.8836	0	0	0	0	0	0	0	0	0	0	0	0	0	0	0	0	0	0	0	0	0	0	0	0	0	0	0
AC003968.1	0	0	0	0	0	0	0	0	0	0	0	0	0	0	0	0	0	0	0	0	0	0	0	0	0	0	0	0	0	0	0	0	0	0	0	0	0	0	0	0	0	0	0	0	0	0	0	0	0
AC003973.1	5.1224	0	0	8.8972	16.8401	14.9063	23.0537	0	17.3903	30.4623	4.0634	13.1064	19.3426	0	11.96	3.3718	2.6374	8.4305	6.1035	16.2068	6.2745	9.7199	0	7.3501	0	23.2272	0.9132	6.3779	7.3993	3.2476	0	0	3.8421	9.5764	3.9121	0.7767	1.9866	0.8912	1.0852	0	4.4977	3.1162	1.8752	0	0.8731	4.7897	0	0.7671	0
AC003973.3	23.0506	0	2.8121	43.3737	22.4534	88.1954	34.5806	11.4636	55.0694	16.1271	18.9626	49.1492	60.3033	5.278	57.8068	11.2393	54.0675	18.3938	14.2415	9.0038	28.2352	12.3708	50.5799	62.4759	11.4351	109.684	0	67.6056	89.6133	20.5682	34.4909	26.6311	0	40.6998	46.9447	16.3106	10.9262	3.5647	16.2783	9.4361	94.4525	23.3714	7.5006	0.782	0	7.9828	2.7281	0	0
AC003973.4	0	0	0	0	0	1.2422	0	0	0	0	0	1.0922	0	0	0	0	0	0	0	0	0	0	0	0	0	0	0	1.2756	0	0	0	0	0	0	0.978	0	0	0	0	0	0	0.779	0	0	0	0	0	0	0
AC003984.1	0	58.1753	18.747	0	18.2434	4.9688	2.8817	0	1.9323	0	0	6.5532	9.1024	5.278	13.9534	14.6111	5.2749	9.1969	34.5865	9.0038	5.2287	4.4182	3.7467	2.7563	1.2706	32.26	25.5689	6.3779	0	18.4031	7.2612	2.8533	0	1.5961	0.978	8.5437	15.8926	0.8912	2.713	24.3766	0	3.1162	124.698	9.3837	6.1118	0	14.3225	19.1766	17.7847
AC003985.1	0	0	0	0	0	0	0	0	0	0	0	0	0	0	0	0	0	0	0	0	0	0	0	0	0	0	0	0	0	0	0	0	0	0	0	0	0	0	0	0	0	0	0	0	0	0	0	0	0
AC003986.5	0	0	0	0	0	0	0	0	1.9323	0	0	0	0	0	0	0	0	0	0	0	0	0	1.8733	0	0	0	0	0	0	0	0	0	0	0	0	0	0	0	0	0	0	0	0	0	0	0	0	0.7671	0
AC003986.6	8.9641	0	0	1.1121	5.6134	0	0	11.4636	4.8307	1.7919	5.4179	0	0	0	0	1.1239	0	0	4.069	2.7011	0	0	3.7467	2.7563	2.5411	3.8712	0	0	1.6443	0	1.8153	0.9511	1.921	1.5961	1.956	0.7767	0.9933	0	0.5426	1.5727	0.8995	0	0.9376	0	0.8731	0	0	0	0
AC003986.7	0	0	0	0	0	0	0	0	0	0	0	0	0	0	0	0	0	0	0	0	0	0.8836	0	0	1.2706	1.2904	0	0	0	0	0	0	0.9605	0	0	0	0	0	0	0	0	0	0	0	0	0	0	0	0
AC003988.1	1.2806	0	0	0	0	0	0	0	0	0	0	0	0	0	0	0	0	0	0	0	0	0	0	0	0	0	0	0	0	0	0	0	0	0	0	0	0	0	0	0	0	0	0	0	0	0	0	0	0
AC003989.3	10.2447	23.2701	13.1229	0	1.4033	11.1797	2.8817	7.295	1.9323	8.9595	17.6081	7.6454	3.4134	1.3195	7.9733	5.6197	1.3187	3.0656	7.1207	7.203	2.0915	3.5345	1.8733	9.1876	8.894	10.3232	0	2.5512	0	6.4952	0	0.9511	6.7236	2.3941	3.9121	0.7767	2.9799	0	4.3409	1.5727	0	0.779	3.7503	0.782	2.6193	0.7983	2.7281	2.3012	0
AC003989.4	47.3818	104.716	48.7423	18.9065	30.8735	40.9922	17.2903	40.6437	28.0178	60.9245	47.4064	58.979	30.7206	27.7092	51.8268	50.5769	98.904	33.722	32.552	29.7124	37.647	39.7634	49.6433	42.2631	96.5631	45.164	30.1348	45.9208	15.6207	44.3841	34.4909	57.0667	23.0524	27.9312	14.6702	20.1941	32.7786	18.7144	33.6418	36.1717	31.4842	15.5809	59.0675	28.1512	32.3053	22.352	42.2855	17.6424	41.4976
AC003991.3	11.5253	14.5438	15.935	14.4579	29.4701	27.3281	8.6452	13.5479	26.0855	39.4218	40.634	13.1064	15.9292	13.1949	19.9334	11.2393	56.705	7.6641	17.2932	8.1034	16.732	14.1381	19.67	12.8627	15.2468	23.2272	5.479	15.3069	0	2.1651	7.2612	5.7067	4.8026	9.5764	24.4504	6.9903	6.953	13.3675	4.8835	9.4361	12.5937	10.9066	2.8127	4.6919	7.858	17.5622	11.5944	8.4377	5.9282
AC004000.1	0	0	0	0	0	0	0	0	0	0	0	0	0	0	0	0	0	0	0	0	0	0	0	0	0	0	0	0	0	0	0	0	0	0	0	0	0	0	0	0	0	0	0	0	0	0	0	0	0
AC004004.2	0	0	0.9374	0	0	3.7266	0	0	2.8984	0	2.7089	0	7.9646	0	1.9933	1.1239	0	6.1313	0	1.8008	1.0457	0.8836	0	1.8375	0	2.5808	0.9132	1.2756	0.8221	0	0	1.9022	0	0.798	0	2.3301	0	1.7823	3.7983	0	1.7991	0	0	0	0	0	0	0	0
AC004006.2	0	0	0	0	0	0	0	0	0	0	0	0	0	0	0	0	0	0	0	0	0	0	0	0	0	0	0	0	0	0	0	0	0	0	0	0	0	0	0	0	0	0	0	0	0	0	0	0	0
AC004009.1	0	0	0	0	0	0	0	0	0	0	0	1.0922	0	0	0	0	0	0	0	0	0	0	0	0	0	0	0	1.2756	0	0	0	0	0.9605	0	0	0	0	0	0	0	0	0	0	0	0	0	0	0	0
AC004009.2	0	0	0	0	0	0	0	0	0	0	0	0	0	0	0	0	0	0.7664	0	0	0	0	0	0	0	0	0	0	0	0	0	0	0.9605	0	0	0	0	0	0	0	0	0	0	0	0	0	0	0	0
AC004009.3	0	0	0	0	0	0	0	0	0	0	0	0	0	0	0	0	0	0	0	0	0	0	0	0	0	0	0	0	0	0	0	0	0	0	0	0	0	0	0	0	0	0	0	0	0	0	0	0	0
AC004012.1	0	0	0	0	0	0	0	1.0421	0	0	0	0	0	0	0	0	0	0	0	0	0	0	0	0	0	0	0	0	0.8221	0	0	0	0	0	0	0	0	0	0	0	0	0	0	0	0	0	0	0	0
AC004014.3	0	0	0	0	0	0	0	0	0.9661	0	0	0	0	0	0	0	0	0	0	0	0	0	0	0	0	0	0	0	0	0	0	0	0	0	0	0.7767	0	0	0	0	0	0	0	0	0	0	0	0	0
AC004014.4	2.5612	0	0.9374	0	1.4033	0	0	1.0421	0	3.5838	0	1.0922	1.1378	0	0	0	0	0	2.0345	0	0	0.8836	0	0	0	1.2904	0	0	0	0	1.8153	0	0	0.798	0	0	0	0	1.0852	0	0	0	0	1.564	0.8731	0	0	0	0
AC004016.1	0	0	0	0	0	0	0	0	0	0	0	0	0	0	0	0	0	0	0	0	0	0	0	0	0	0	0	2.5512	0	0	0	0	0	0	0	0	0	0	0	0	0	0	0	0	0	0	0	0	0
AC004019.10	14.0865	14.5438	19.6844	1.1121	0	29.8125	0	9.3793	9.6613	1.7919	0	20.7519	26.1694	1.3195	15.9467	5.6197	17.1434	26.0579	13.2242	47.72	14.6405	11.4872	1.8733	7.3501	1.2706	14.1944	14.6108	11.4802	0.8221	8.6603	2.723	3.8044	5.7631	1.5961	2.934	9.3204	8.9396	30.2996	10.8522	3.1454	4.4977	12.4647	3.7503	20.3314	8.7312	11.176	19.7787	6.9036	5.9282
AC004019.13	5.1224	11.6351	5.6241	1.1121	4.21	59.625	5.7634	136.521	6.7629	19.7109	4.0634	12.0142	25.0316	1.3195	10.9634	10.1154	14.5059	10.7297	6.1035	36.0151	20.915	3.5345	0.9367	11.0252	1.2706	15.4848	9.1317	11.4802	0.8221	10.8254	2.723	2.8533	46.1047	15.9607	52.8128	13.2038	3.9732	23.1703	4.8835	10.2224	8.0959	10.1276	2.8127	11.7297	26.1935	11.176	3.4101	3.0683	17.7847
AC004022.7	0	0	0	0	0	0	0	0	0	0	0	0	0	0	0	0	0	0	0	0	0	0	0	0	0	0	0	0	0	0	0	0	0	0	0	0	0	0	0	0	0	0	0	0	0	0	0	0	0
AC004022.8	2.5612	0	0	0	0	1.2422	0	2.0843	2.8984	0	0	0	0	1.3195	0	1.1239	1.3187	1.5328	0	5.4023	0	1.7673	0	2.7563	0	0	2.7395	1.2756	1.6443	0	0.9077	0	1.921	0.798	0	0	0	0	1.0852	0	2.6986	0	0.9376	0	1.7462	3.1931	0.682	2.3012	0
AC004041.2	21.77	11.6351	6.5615	10.0093	4.21	9.9375	5.7634	7.295	3.8645	10.7514	13.5447	21.8441	11.378	9.2364	12.9567	12.3632	10.5498	10.7297	10.1725	8.1034	8.366	6.1854	4.6833	15.619	8.894	16.7752	7.3054	5.1023	9.0435	9.7428	5.4459	6.6578	8.6446	12.7686	3.9121	5.4369	3.9732	4.4558	3.2557	7.0771	3.5982	11.6857	0.9376	4.6919	2.6193	3.1931	6.8202	4.6024	0
AC004051.2	2.5612	0	0.9374	0	4.21	3.7266	0	100.046	1.9323	60.9245	2.7089	90.6529	70.5435	0	3.9867	1.1239	1.3187	0.7664	8.138	1.8008	0	2.6509	0	0	3.8117	1.2904	0.9132	1.2756	0	4.3302	0	2.8533	5.7631	5.5862	0	25.631	0	36.5377	0.5426	2.359	0.8995	2.3371	6.5631	1.564	57.6257	0	4.0921	1.5341	0
AC004052.1	0	0	0	0	0	0	0	0	0	0	0	0	0	0	0	0	0	0	0	0	0	0	0	0	0	0	0	0	0	0	0	0	0	0	0	0	0	0	0	0	0	0	0	0	0	0	0	0	0
AC004053.1	0	165.8	2.8121	1.1121	2.8067	7.4531	0	0	3.8645	1.7919	4.0634	4.3688	5.689	5.278	1.9933	7.8675	19.7808	10.7297	18.3105	4.5019	14.6405	1.7673	1.8733	1.8375	2.5411	9.0328	10.9581	26.7871	4.1107	12.9905	16.3378	2.8533	0.9605	1.5961	8.8021	1.5534	8.9396	8.9116	2.1704	2.359	25.1873	0.779	12.1885	0.782	3.4925	0	6.1382	0	0
AC004054.1	0	0	0	0	0	3.7266	0	0	0	3.5838	1.3545	2.1844	0	0	0.9967	1.1239	0	0	3.0517	0	1.0457	0	0	0	1.2706	1.2904	0	1.2756	0	0	0	1.9022	0	0	0	0.7767	0	0.8912	0.5426	0	0	0.779	0	0	0.8731	0	4.0921	0	0
AC004057.1	1.2806	23.2701	29.9952	37.813	21.0501	86.9532	66.2795	153.196	16.4242	0	50.1153	7.6454	59.1655	60.6964	43.8534	49.4529	44.8365	45.2181	21.3622	8.1034	26.1437	35.3452	23.4166	5.5126	39.3876	9.0328	130.584	2.5512	92.9019	50.8793	31.7679	66.5778	30.7365	72.6212	38.1426	102.524	18.8725	57.0345	37.9826	14.1541	78.2606	34.278	129.386	68.0321	50.6407	13.5708	78.4327	41.4214	0
AC004062.2	0	0	0	0	1.4033	0	0	4.1686	0	0	0	0	0	0	0	0	0	0	0	0	0	0	0	0	0	0	0	0	0	0	0	0	0	0	0	0	0	0	0	0	0	0	0	0	0	0	0	0	0
AC004063.1	0	11.6351	0	0	0	0	0	0	0.9661	0	1.3545	0	1.1378	0	0	0	0	0.7664	1.0172	0.9004	4.183	0	0	0	0	0	0	3.8267	0	0	0	1.9022	0	0	0	0	0	0.8912	0.5426	0	0.8995	0	0.9376	0	2.6193	0	0	0	0
AC004066.2	2.5612	0	0	0	0	0	0	0	0.9661	0	0	1.0922	0	0	0	1.1239	0	1.5328	0	0	1.0457	2.6509	0	0.9188	0	0	0	1.2756	0	1.0825	0	0.9511	0	0	0	0	0.9933	0	0	0	0	0	0	0	0.8731	0.7983	0.682	0	0
AC004066.3	1.2806	0	0.9374	0	0	0	0	0	0	0	0	0	0	0	0.9967	0	0	0	0	0.9004	0	0.8836	0	0	0	0	0	0	0	2.1651	0	0	0	0	0	0	0	0	0	0	0	0	0	0	0	0	0	0	0
AC004067.5	20.4894	8.7263	9.3735	16.6822	9.8234	11.1797	11.5269	6.2529	10.6274	21.5028	24.3804	16.3831	12.5158	21.1118	23.92	13.4872	27.6931	6.8977	11.1897	5.4023	17.7777	10.6036	10.3033	19.294	8.894	11.6136	7.3054	7.6535	7.3993	10.8254	5.4459	4.7556	6.7236	5.5862	10.7582	7.767	8.9396	9.8028	5.9687	5.5044	2.6986	10.1276	3.7503	5.4739	8.7312	0.7983	6.1382	0.7671	0
AC004069.1	0	8.7263	0	0	4.21	0	0	0	3.8645	0	0	0	1.1378	0	0	2.2479	5.2749	8.4305	8.138	0	6.2745	0	1.8733	2.7563	0	2.5808	10.0449	15.3069	0	3.2476	2.723	0	0	0	0.978	0	1.9866	0.8912	2.1704	1.5727	7.1964	0	3.7503	0	0	0	2.0461	0	0
AC004069.2	5.1224	0	6.5615	1.1121	4.21	3.7266	0	0	1.9323	0	9.4813	1.0922	3.4134	1.3195	3.9867	0	3.9562	0	1.0172	0.9004	2.0915	3.5345	6.5567	3.6751	0	5.1616	1.8263	10.2046	3.2886	2.1651	0	0.9511	0	6.3843	0	3.8835	0	1.7823	0.5426	0.7863	2.6986	1.5581	3.7503	3.1279	0	0.7983	2.7281	6.1365	0
AC004070.1	0	0	0	0	0	0	0	0	0	0	0	0	0	0	0	0	0	0	0	0	0	0	0	0	0	0	0	0	0	0	0	0	0	0	0	0	0	0	0	0	0	0	0	0	0.8731	0	0	0	0
AC004074.4	0	0	0	0	0	0	0	0	0	0	0	0	0	0	0	0	0	0	0	0	0	0	0	0	0	0	0	0	0	0	0	0	0	0	0	0	0	0	0	0	0	0	0	0	0	0	0	0	0
AC004076.5	51.2236	104.716	58.1158	24.4672	39.2935	80.7422	20.172	62.5288	41.5436	383.466	56.8877	218.441	19.3426	114.795	49.8334	33.7179	52.7488	29.8899	46.7934	16.2068	37.647	35.3452	41.2133	54.207	41.9287	73.5527	35.6138	17.8581	36.1742	42.219	32.6756	58.0178	34.5785	30.3253	26.4064	24.0776	14.8993	24.0614	21.1617	45.6078	12.5937	29.6038	21.5643	40.6629	31.4322	9.5794	26.5989	65.9674	0
AC004076.7	0	0	0	0	1.4033	0	0	0	0	0	0	5.461	0	0	0	0	0	1.5328	0	0	0	0	0	0	0	0	0	7.6535	0	0	0	0	0	0	0	0	0	0	0	0	0	0	0	0	0	0	0	0	0
AC004076.9	3.8418	0	6.5615	0	4.21	8.6953	0	10.4215	4.8307	0	12.1902	16.3831	2.2756	7.9169	0.9967	3.3718	0	6.1313	6.1035	2.7011	8.366	2.6509	0	4.5938	1.2706	2.5808	5.479	20.4093	3.2886	2.1651	0.9077	2.8533	6.7236	8.7784	7.8241	3.1068	3.9732	0	3.2557	2.359	3.5982	0	6.5631	6.2558	13.0967	7.9828	3.4101	7.6706	11.8565
AC004079.1	0	0	0	0	0	0	0	0	0	0	0	0	0	0	0	0	0	0	0	0	0	0	0	0	1.2706	0	0	0	0	0	0	0	0	0	0	0	0	0	0	0	0	0	0	0	0	0	0	0	0
AC004112.4	0	0	0	0	0	0	0	0	0.9661	0	0	0	0	0	0	0	0	0	0	0	0	0	0	0	0	0	0	2.5512	0	0	0	0	0	0	0	0.7767	0	0	0	0.7863	0	0.779	0	0	0	0	0	0.7671	0
AC004112.5	0	0	0	0	0	0	0	0	0	0	0	0	0	0	0	0	0	0.7664	0	0	0	0	0	0	0	0	0	0	0	0	0.9077	0	0	0	0	0	0	0	0	0	0	0	0	0	0	0	0	0	0
AC004112.7	0	2.9088	0	0	0	0	0	0	0	0	0	0	0	0	0	0	0	0	0	0	0	0	1.8733	0	0	1.2904	0	1.2756	0	0	0.9077	0	0	1.5961	0.978	0	0	0	0	0	0	0	0.9376	0.782	0	0	0	0	0
AC004125.3	0	0	0	0	0	0	0	0	0	0	0	0	0	0	0	0	0	0	0	0	0	0	0	0	0	0	0	0	0	0	0	0	0	0	0	0	0	0	0	0	0	0	0	0	0	0	0	0	0
AC004129.7	0	0	0	0	0	0	0	0	0	0	0	0	0	0	0	0	0	0	0	0	0	0	0	0	0	0	0	0	0	0	0	0	0	0	0	0	0	0	0	0	0	0	0	0	0	0	0	0	0
AC004129.9	0	0	0	0	0	0	0	0	0	0	0	0	0	0	0	0	0	0	0	0	0	0	0	0	0	0	0	0	0	0	0	0	0	0	0	0	0	0	0	0	0	0	0	0	0	0	0	0	0
AC004156.3	42.2595	11.6351	12.1856	4.4486	5.6134	9.9375	20.172	9.3793	6.7629	10.7514	17.6081	3.2766	10.2402	19.7923	14.95	5.6197	19.7808	11.4961	12.207	36.0151	10.4575	18.5562	11.24	12.8627	3.8117	15.4848	3.6527	5.1023	12.3321	5.4127	14.5225	17.12	5.7631	8.7784	9.7801	6.2136	25.8255	6.2381	14.1078	15.7268	5.3973	9.3486	11.251	5.4739	4.3656	12.7725	10.9124	32.9837	11.8565
AC004158.3	16.6477	0	17.8097	20.0186	26.6635	14.9063	0	10.4215	6.7629	10.7514	6.7723	1.0922	10.2402	3.9585	4.9833	7.8675	5.2749	2.2992	3.0517	12.6053	6.2745	2.6509	20.6066	13.7814	0	27.0984	28.3084	5.1023	4.9328	1.0825	1.8153	19.0222	3.8421	5.5862	0	6.2136	7.9463	1.7823	4.3409	14.9405	0	6.2324	0.9376	14.8576	6.9849	3.9914	8.8663	15.3413	0
AC004159.1	0	0	0	0	0	1.2422	0	1.0421	0	0	0	0	0	0	0	0	0	0	0	0	0	0	0	1.8375	0	0	0	0	0	0	0	0	0	0	0	0	0.9933	0	0	0	0	0	0	0	0	0	0	0	0
AC004160.4	0	8.7263	0.9374	4.4486	5.6134	3.7266	0	3.1264	1.9323	1.7919	12.1902	7.6454	1.1378	2.639	5.98	5.6197	13.1872	10.7297	5.0862	2.7011	2.0915	3.5345	0.9367	3.6751	7.6234	1.2904	1.8263	10.2046	0	5.4127	2.723	2.8533	0	4.7882	2.934	0.7767	1.9866	1.7823	0.5426	13.3678	1.7991	0.779	1.8752	2.3459	2.6193	0.7983	0.682	0.7671	0
AC004166.6	1.2806	23.2701	7.4988	5.5607	16.8401	17.3906	0	8.3372	3.8645	35.838	12.1902	6.5532	9.1024	6.5974	7.9733	13.4872	1.3187	7.6641	3.0517	8.1034	4.183	10.6036	0	11.9439	0	5.1616	5.479	11.4802	8.2214	8.6603	2.723	3.8044	20.1708	9.5764	1.956	0.7767	2.9799	7.1293	7.0539	5.5044	2.6986	3.1162	4.6879	6.2558	5.2387	4.7897	6.8202	1.5341	0
AC004221.2	0	0	0	0	0	0	2.8817	0	0.9661	1.7919	0	0	1.1378	1.3195	2.99	0	0	1.5328	1.0172	4.5019	0	0	1.8733	1.8375	0	1.2904	1.8263	3.8267	0	0	0	0	0	0	0.978	0.7767	0	0.8912	0.5426	0	0.8995	0	0	0	1.7462	2.3949	0	0	0
AC004231.2	5.1224	0	0	4.4486	1.4033	0	0	0	0	0	0	0	0	0	0.9967	0	1.3187	1.5328	0	0.9004	0	0	5.62	0.9188	0	0	0.9132	0	1.6443	0	0	1.9022	0	0	2.934	3.8835	0	0	0.5426	0	0	1.5581	0	0	0	0	0	3.8353	0
AC004237.1	12.8059	34.9052	5.6241	11.1215	25.2601	22.3594	8.6452	3.1264	14.492	10.7514	23.026	9.8298	11.378	10.5559	16.9434	16.859	29.0118	13.7954	14.2415	9.0038	17.7777	8.8363	5.62	11.9439	7.6234	27.0984	9.1317	7.6535	3.2886	11.9079	9.0766	8.56	13.4472	3.9902	12.7142	10.8738	16.8859	11.5851	13.5652	7.8634	5.3973	9.3486	28.1274	7.8198	2.6193	7.1846	10.2304	10.7389	11.8565
AC004257.1	3.8418	0	0	6.6729	0	0	0	0	0.9661	0	4.0634	1.0922	0	0	0.9967	2.2479	0	0	1.0172	2.7011	0	2.6509	0	0	0	0	0	0	0.8221	0	0.9077	0	0.9605	1.5961	0	0	0	1.7823	0.5426	0	0.8995	1.5581	0	0	0	0	0	0	0
AC004381.6	14.0865	8.7263	15.935	45.598	33.6802	24.8438	20.172	20.8429	36.7129	8.9595	25.7349	12.0142	25.0316	27.7092	14.95	20.2307	23.737	21.4594	11.1897	8.1034	19.8692	20.3235	17.7966	16.5377	17.7879	16.7752	21.003	19.1337	30.4192	15.1555	11.7995	21.8756	12.4867	22.345	21.5163	24.0776	7.9463	24.0614	24.4174	22.8039	15.2923	45.1847	15.0013	26.5873	20.0817	21.5537	23.1888	33.7508	17.7847
AC004381.7	8.9641	2.9088	0	4.4486	0	1.2422	0	1.0421	0	0	0	0	1.1378	0	0	1.1239	10.5498	5.3649	1.0172	0	0	0.8836	2.81	0.9188	2.5411	0	1.8263	0	0	0	0.9077	0	0	0	0	0.7767	0.9933	0	1.0852	0	0	0	0	1.564	0	0	0	0	0
AC004383.3	5.1224	2.9088	2.8121	3.3364	1.4033	3.7266	0	1.0421	1.9323	0	1.3545	3.2766	2.2756	1.3195	0.9967	1.1239	1.3187	0	0	1.8008	0	2.6509	0.9367	0.9188	0	3.8712	0	2.5512	0.8221	0	0.9077	0	1.921	0	0	1.5534	0.9933	0.8912	1.6278	0.7863	0	0.779	0	0.782	0	0	0	0.7671	0
AC004386.3	0	0	0	0	0	0	0	0	0	0	0	0	0	0	0	0	0	0	0	0	0	0	0	0	0	0	0	0	0	0	0	0	0	0	0	0	0	0	0	0	0	0	0	0	0	0	0	0	0
AC004386.4	0	0	0	1.1121	1.4033	0	0	1.0421	0	0	0	1.0922	0	0	0	0	0	0	0	0	0	0	0	0	0	0	0	0	0	0	0	0	0	0	0	0	0	0	0	0	0	0	0	0	0.8731	0	0	0	0
AC004448.2	0	0	0	0	0	0	0	0	0.9661	0	1.3545	0	0	0	0	0	0	0	2.0345	0.9004	0	0	4.6833	1.8375	0	0	0	0	0	0	1.8153	0	0	0	0	0	0	0	0.5426	1.5727	0.8995	0	0	0	0	0	0	0	0
AC004448.5	1.2806	2.9088	0.9374	0	0	2.4844	0	2.0843	0	1.7919	0	3.2766	1.1378	1.3195	3.9867	1.1239	0	0.7664	0	1.8008	0	0	0.9367	2.7563	1.2706	0	0.9132	2.5512	0	0	1.8153	4.7556	1.921	0	0.978	2.3301	0	0	1.6278	1.5727	0	0.779	0	0	0	1.5966	4.0921	0.7671	0
AC004449.6	1.2806	2.9088	0	0	1.4033	0	0	0	2.8984	7.1676	0	0	1.1378	0	0.9967	1.1239	2.6374	4.5985	2.0345	0	0	1.7673	0	0	1.2706	0	0	0	0.8221	0	0.9077	4.7556	0	1.5961	2.934	0	0	1.7823	1.0852	0	0	1.5581	0	3.9099	0	0	1.364	0.7671	0
AC004453.8	62.7489	122.168	107.795	53.3831	67.3603	96.8907	80.6881	108.383	38.6452	59.1326	127.32	62.2556	71.6813	46.1821	67.7735	70.8076	65.936	48.2837	85.4489	30.6128	92.0259	73.3414	30.91	105.658	35.5759	56.7775	80.3594	86.7393	40.2849	69.2824	54.4593	53.2623	72.0386	94.9661	71.3951	52.0387	34.7651	42.7759	49.3774	56.6166	37.781	54.5332	85.3197	27.3693	43.6558	27.1417	45.6956	53.6944	0
AC004458.1	0	0	0	0	0	0	0	0	0	0	0	0	0	0	0	0	0	0	0	0	0	0	0	0	0	0	0	0	0	0	0	0	0	0	0	0	0	0	0	0	0	0	0	0	0	0	0	0	0
AC004460.1	0	0	0	0	0	0	0	0	0	0	0	0	0	0	0	0	0	0	0	0	0	0	0	0	0	0	0	0	0	0	0	0	0	0	0	0	0	0	0	0	0	0	0	0	0	0	0	0	0
AC004461.4	0	2.9088	2.8121	8.8972	2.8067	1.2422	11.5269	3.1264	2.8984	8.9595	4.0634	7.6454	1.1378	7.9169	2.99	5.6197	5.2749	3.832	4.069	5.4023	5.2287	4.4182	4.6833	4.5938	5.0823	0	2.7395	8.929	2.4664	5.4127	1.8153	2.8533	0	1.5961	0	0	0.9933	1.7823	3.2557	3.1454	2.6986	2.3371	3.7503	1.564	0	4.7897	2.0461	3.8353	0
AC004471.10	1.2806	0	0.9374	2.2243	5.6134	3.7266	2.8817	5.2107	4.8307	7.1676	4.0634	4.3688	3.4134	2.639	0.9967	4.4957	6.5936	1.5328	0	3.6015	5.2287	0	6.5567	0.9188	0	1.2904	0	0	1.6443	2.1651	0	0.9511	2.8815	0	0.978	0	0	0.8912	0.5426	0	0	0.779	0	0	1.7462	0.7983	2.7281	0	0
AC004471.9	10.2447	5.8175	7.4988	13.3458	9.8234	2.4844	34.5806	17.7165	9.6613	12.5433	0	14.1987	2.2756	22.4313	11.96	12.3632	15.8246	9.1969	10.1725	10.8045	9.4117	13.2545	15.9233	7.3501	11.4351	12.904	3.6527	2.5512	8.2214	9.7428	3.6306	11.4133	9.6052	7.1823	1.956	4.6602	5.9597	5.347	12.48	2.359	5.3973	2.3371	3.7503	7.0378	5.2387	14.3691	4.7742	2.3012	5.9282
AC004485.3	0	14.5438	6.5615	0	0	4.9688	0	0	0	0	1.3545	8.7376	7.9646	3.9585	1.9933	20.2307	3.9562	9.9633	5.0862	3.6015	1.0457	3.5345	0.9367	11.9439	0	54.1967	3.6527	43.3697	1.6443	7.5778	5.4459	1.9022	0	0	0	7.767	10.9262	9.8028	24.96	3.1454	8.9955	5.4533	2.8127	2.3459	6.9849	0	0.682	0.7671	0
AC004490.1	72.9936	26.1789	42.1808	43.3737	32.2768	19.875	17.2903	14.5901	18.3565	41.2136	24.3804	21.8441	19.3426	34.3067	23.92	22.4786	39.5616	25.2915	18.3105	47.72	24.0522	18.5562	47.7699	33.0755	34.3053	23.2272	18.2635	38.2673	15.6207	17.3206	14.5225	13.3156	24.9734	11.9705	16.6262	17.0873	23.839	30.2996	39.0678	16.5132	15.2923	12.4647	3.7503	18.7675	11.3505	59.073	23.1888	16.1083	29.6412
AC004492.1	0	0	0	0	0	0	0	0	0	0	0	0	0	0	0	0	0	0	0	0	0	0	0	0	0	0	0	0	0	0	0	0	0	0	0	0	0	0	0	0	0	0	0	0	0	0	0	0	0
AC004510.3	1.2806	0	0	0	0	0	0	0	0	0	0	0	0	0	0	0	1.3187	0	0	0	0	0	0	0	0	0	0	0	0	0	0	0	0.9605	0	0.978	0	0	0	0	0	0.8995	0	0	0	0	0	0	0	0
AC004520.1	0	0	0	0	0	0	0	0	0	0	0	0	0	0	0	0	0	0	0	0	0	0	0	0	0	0	0	0	0	0	0	0	0	0	0	0	0	0	0	0	0	0	0	0	0	0	0	0	0
AC004535.2	0	0	0	0	0	0	0	0	0	0	0	0	0	0	0	0	0	0	0	0	0	0	0	0	0	0	0	0	0	0	0	0	0	0	0	0	0	0	0	0	0	0	0	0	0	0	0	0	0
AC004538.3	32.0147	37.814	27.1832	22.2429	40.6969	42.2344	17.2903	34.3909	31.8823	16.1271	60.9511	66.6244	9.1024	34.3067	55.8134	25.8504	163.521	43.6853	60.0177	10.8045	18.8235	21.2071	36.53	33.0755	97.8337	63.2295	41.0929	28.0627	9.0435	35.7238	17.2455	90.3556	16.3288	38.3057	44.9887	23.3009	32.7786	5.347	12.48	122.669	56.6715	31.1619	100.321	14.0756	34.9246	7.9828	17.7326	2.3012	5.9282
AC004540.4	11.5253	23.2701	7.4988	12.2336	9.8234	50.9297	17.2903	13.5479	4.8307	0	10.8357	29.4895	10.2402	10.5559	32.8901	15.735	27.6931	23.7587	10.1725	10.8045	11.5032	7.9527	7.4933	16.5377	12.7057	24.5176	26.4821	38.2673	9.8657	35.7238	9.0766	8.56	0.9605	25.5371	22.4943	18.6407	14.8993	14.2586	14.6504	13.3678	12.5937	8.5695	53.442	31.2791	44.5289	13.5708	18.4146	12.273	5.9282
AC004540.5	16.6477	104.716	29.0579	26.6915	22.4534	54.6563	112.387	31.2644	22.221	3.5838	27.0894	62.2556	61.4411	42.2236	74.7501	31.47	13.1872	72.0424	17.2932	64.8271	34.5097	31.8107	7.4933	35.8317	6.3528	34.8408	36.527	28.0627	47.6841	22.7333	38.1215	24.7289	4.8026	32.7194	17.6043	45.0484	12.9128	62.3815	18.4487	38.5307	14.3928	42.0685	46.879	68.0321	73.3417	22.352	28.645	21.4778	391.263
AC004543.1	0	0	0	0	0	0	0	0	0	0	0	0	0	0	0	0	0	0	0	0	0	0	0	0	0	0	0	0	0	0	0	0	0	0	0	0	0	0	0	0	0	0	0	0	0	0	0	0	0
AC004543.2	0	0	0	0	0	0	0	0	0	0	0	0	0	0	0	0	0	0	0	0	0	0	0	0	0	0	0	0	0	0	0	0	0	0	0	0	0	0	0	0	0	0	0	0	0	0	0	0	0
AC004549.6	1.2806	2.9088	2.8121	0	4.21	3.7266	0	4.1686	0.9661	1.7919	2.7089	6.5532	5.689	5.278	2.99	1.1239	1.3187	5.3649	5.0862	3.6015	0	1.7673	3.7467	0.9188	5.0823	6.452	5.479	3.8267	4.9328	2.1651	2.723	5.7067	0	0.798	1.956	3.1068	0.9933	4.4558	8.1391	2.359	0.8995	3.8952	4.6879	3.1279	3.4925	2.3949	1.364	1.5341	0
AC004552.1	0	0	0	0	0	0	0	0	0	0	0	0	0	0	0	0	0	0	0	0	0	0	0	0	0	0	0	0	0	0	0	0	0	0	0	0	0	0	0	0	0	0	0	0	0	0	0	0	0
AC004593.3	64.0295	107.624	43.1182	26.6915	42.1002	34.7813	63.3978	161.533	23.1871	84.2192	58.2421	75.3621	38.6851	68.6134	39.8667	42.7094	97.5853	45.2181	45.7762	29.7124	48.1045	21.2071	47.7699	31.2379	48.2816	34.8408	25.5689	20.4093	30.4192	30.3111	45.3828	45.6534	4.8026	45.488	25.4284	13.9805	26.8188	25.8438	24.96	24.3766	42.2787	40.5104	45.0038	11.7297	15.7161	20.7554	26.5989	23.0119	5.9282
AC004595.1	0	0	0	0	0	0	0	0	0	0	0	0	0	0	0	0	0	0	0	0	0	0	0	0	0	0	0	0	0	0	0	0	0	0	0	0	0	0	0	0	0	0	0	0	0	0	0	0	0
AC004603.4	3.8418	17.4526	0	0	0	9.9375	51.8709	372.046	0	757.973	31.1528	622.556	210.493	0	65.7801	21.3547	5.2749	16.0946	29.5002	173.773	106.666	10.6036	0.9367	67.9884	0	14.1944	10.0449	1.2756	18.9092	2.1651	13.6148	42.8	535.967	216.267	89.9773	80.7765	0	201.403	9.767	0	174.512	66.2189	26.2522	55.5205	497.676	19.9571	6.1382	79.0075	136.349
AC004623.2	0	0	4.6868	0	0	0	0	0	0	0	0	5.461	0	0	0	0	0	0	0	0	8.366	0	0	0	0	0	1.8263	0	0	0	0	0	0	0	0	0	0	0	0	0	0	0	2.8127	2.3459	0	0	0	0	5.9282
AC004623.3	70.4324	34.9052	26.2458	93.4203	39.2935	45.961	28.8172	62.5288	42.5097	60.9245	29.7983	63.3478	43.2363	47.5016	35.8801	61.8162	38.2429	72.0424	41.7072	139.558	30.3267	53.0178	76.8066	78.0948	35.5759	52.9063	51.1378	34.4406	27.9528	50.8793	31.7679	42.8	72.0386	30.3253	27.3844	31.0679	43.7048	69.5108	101.468	37.7444	51.2742	35.8361	2.8127	43.0088	25.3204	129.322	34.7832	38.3531	106.708
AC004637.1	38.4177	14.5438	7.4988	6.6729	16.8401	7.4531	28.8172	4.1686	4.8307	17.919	10.8357	14.1987	11.378	11.8754	9.9667	5.6197	19.7808	7.6641	12.207	9.0038	5.2287	6.1854	10.3033	11.9439	7.6234	5.1616	3.6527	2.5512	3.2886	6.4952	3.6306	11.4133	6.7236	1.5961	5.8681	4.6602	0.9933	4.4558	5.9687	4.718	2.6986	2.3371	0.9376	3.1279	1.7462	19.9571	2.0461	1.5341	0
AC004655.1	0	0	0	0	0	0	0	0	0	0	0	0	0	0	0	0	0	0	0	0	0	0	0	0	0	0	0	0	0	0	0	0	0	0	0	0	0	0	0	0	0	0	0	0	0	0	0	0	0
AC004673.1	0	0	0	0	0	0	0	0	0	0	0	0	0	0	0	0	0	0	0	0	0	0	0	0	0	0	0	0	0	0	0	0	0	0	0	0	0	0	0	0	0	0	0	0	0	0	0	0	0
AC004691.5	2.5612	5.8175	2.8121	3.3364	4.21	2.4844	8.6452	1.0421	1.9323	1.7919	2.7089	3.2766	3.4134	1.3195	4.9833	2.2479	5.2749	4.5985	3.0517	0.9004	5.2287	5.3018	6.5567	3.6751	2.5411	10.3232	3.6527	2.5512	0.8221	1.0825	0	9.5111	5.7631	6.3843	0	0.7767	6.953	3.5647	4.8835	0	1.7991	0	6.5631	4.6919	0	0	3.4101	1.5341	0
AC004692.4	3.8418	0	0.9374	0	0	0	0	0	0.9661	0	0	0	0	0	0.9967	0	1.3187	0	0	0.9004	0	0.8836	0	1.8375	0	0	0	0	1.6443	0	0	0	0	0.798	0.978	0	0	0	1.6278	0	0	1.5581	0	0.782	0	0	0	0	0
AC004692.5	2.5612	0	0	0	0	0	0	0	0	0	0	0	1.1378	0	0	0	0	0	0	0	0	0	0	0	0	0	0	0	0	0	0	0	0	0	0	0	1.9866	0	0	0	0	0.779	0	1.564	0	0.7983	0	1.5341	0
AC004699.1	0	0	0	0	0	0	0	0	0	0	0	0	0	0	0	0	0	0	0	0	0	0	0	0	0	0	0	0	0	0	0	0	0	0	0	0	0	0	0	0	0	0	0	0	0	0	0	0	0
AC004702.2	1.2806	0	0	0	0	0	0	2.0843	0	0	2.7089	0	0	0	0	1.1239	0	0	0	0	0	0	0.9367	1.8375	0	0	0	0	0	0	0	0	0	0	0	0	0	0	0.5426	0	0	0	0	0	0	0	0	0	0
AC004744.3	0	0	0	0	0	0	0	0	0	0	0	0	0	0	0	0	0	0	0	0	0	0	0	0	0	0	0	0	0	0	0	0	0	0	0	0	0	0	0	0	0	0	0	0	0	0	0	0	0
AC004745.1	0	0	0	0	0	0	0	0	0	0	0	0	0	0	0	0	0	0	0	0	0	0	0	0	0	0	0	0	0	0	0	0	0	0	0	0	0	0	0	0	0	0	0	0	0	0	0	0	0
AC004754.3	5.1224	37.814	7.4988	3.3364	0	6.2109	0	3.1264	3.8645	0	0	2.1844	7.9646	0	18.9367	2.2479	6.5936	8.4305	7.1207	9.0038	2.0915	2.6509	11.24	6.4313	8.894	3.8712	10.9581	17.8581	0	28.146	2.723	5.7067	9.6052	21.5469	0	6.2136	18.8725	8.0205	14.1078	22.0176	0	2.3371	37.5032	10.9477	20.0817	3.9914	12.2764	14.5742	23.7129
AC004769.1	0	0	0	0	0	0	0	0	0	0	0	0	0	0	0	0	0	0	0	0	0	0	0	0	0	0	0	0	0	0	0	0	0	0	0	0	0	0	0	0	0	0	0	0	0	0	0	0	0
AC004775.5	1.2806	2.9088	0.9374	0	0	4.9688	0	0	0	0	0	1.0922	2.2756	2.639	0	0	1.3187	0	2.0345	1.8008	1.0457	0	0	0	0	5.1616	0	1.2756	0.8221	2.1651	0	0	0	0	0	0	0	0	1.0852	2.359	0.8995	1.5581	2.8127	0	0	0	2.0461	0.7671	0
AC004791.2	1.2806	0	0.9374	2.2243	0	0	0	0	0	0	0	0	0	0	0	1.1239	0	0	0	0	1.0457	0	0	0	0	0	0.9132	0	0	0	0	0	0	0	0	0	0	0.8912	0	0	0	0	0	0	0	0	0	0	0
AC004812.1	0	0	0	0	0	0	0	0	0	0	0	0	0	0	0	0	0	0	0	0	0	0	0	0	0	0	0	0	0	0	0	0	0	0	0	0	0	0	0	0	0	0	0	0	0	0	0	0	0
AC004824.1	0	0	0	0	0	0	0	0	0	0	0	0	0	0	0	0	0	0	0	0	0	0	0	0	0	0	0	0	0	0	0	0	0	0	0	0	0	0	0	0	0	0	0	0	0	0	0	0	0
AC004837.3	1.2806	0	0	1.1121	0	2.4844	0	0	3.8645	0	0	0	2.2756	1.3195	0.9967	0	0	2.2992	0	8.1034	0	1.7673	0	0	0	0	1.8263	2.5512	0	0	0	0.9511	0	0	0	0	0	0.8912	0	0.7863	2.6986	2.3371	0	0.782	0.8731	0	0	0	0
AC004837.4	0	0	0	0	1.4033	0	0	1.0421	0	0	0	0	0	0	0	0	0	0	0	0	0	0	0.9367	0	0	0	0	2.5512	0	0	0	0	0	0	0	0.7767	0	0	0	0	0	0	0	0	0	0	0	0	0
AC004837.5	17.9283	8.7263	6.5615	3.3364	1.4033	8.6953	2.8817	34.3909	10.6274	5.3757	24.3804	21.8441	6.8268	5.278	2.99	7.8675	5.2749	4.5985	12.207	0	7.3202	4.4182	10.3033	8.2689	12.7057	10.3232	6.3922	2.5512	8.2214	2.1651	2.723	5.7067	6.7236	3.1921	4.8901	2.3301	4.9664	3.5647	5.9687	3.9317	2.6986	6.2324	11.251	7.8198	6.1118	1.5966	1.364	9.9718	0
AC004840.8	2.5612	0	2.8121	2.2243	0	3.7266	0	0	0	0	0	0	0	1.3195	1.9933	0	1.3187	0.7664	1.0172	0	2.0915	0.8836	0.9367	0	0	1.2904	2.7395	0	0	0	0	0	0.9605	0	0	0.7767	0	0	2.1704	0	0	0	0	0	0	1.5966	0	0	0
AC004854.4	0	0	0	0	0	0	0	0	0	0	0	0	0	0	0	0	0	0	0	0	0	0	0	0	0	0	0	1.2756	0	0	0	0	0	0	0	0	0	0	0	0.7863	0	0	0	0	0	0	0	0	0
AC004854.5	0	0	0	0	0	2.4844	0	4.1686	0	1.7919	0	1.0922	0	0	1.9933	0	0	0	0	0.9004	0	0.8836	1.8733	0.9188	2.5411	2.5808	0	0	0.8221	0	0	0	0.9605	2.3941	0.978	0	0	0	0	0.7863	0	0	0	0	0.8731	0.7983	0	0	0
AC004862.6	0	0	1.8747	0	1.4033	2.4844	0	0	0	0	0	0	0	0	0.9967	0	1.3187	1.5328	1.0172	0.9004	0	0	0.9367	0	1.2706	5.1616	0	2.5512	0.8221	0	0	0	2.8815	0	0	0.7767	0	0	0	0	0	0.779	0	0	0	0	0.682	0	0
AC004866.1	0	0	0	0	0	0	0	0	0	0	0	0	0	0	0	0	0	0	0	0	0	0	0	0	0	0	0	0	0	0	0	0	0	0	0	0	0	0	0	0	0	0	0	0	0	0	0	0	0
AC004866.3	0	0	0	0	0	0	0	0	0	0	0	0	0	0	0	0	0	0	0	0	0	0	0	0	0	0	0	0	0	0	0	0	0	0	0	0	0	0	0	0	0	0	0	0	0	0	0	0	0
AC004869.2	0	0	0	0	0	0	0	0	0	0	0	0	0	0	0	0	0	0	0	0	0	0	0	0.9188	0	0	0	0	0	0	0	0	0	0	0	0	0	0	0	0	0	0	0	0	0	0	0	0	0
AC004869.3	0	0	0	0	0	0	0	0	0	0	0	0	0	0	0	0	0	0	0	0	0	0	0	0	0	0	0	0	0	0	0	0	0	0	0	0	0	0	0	0	0	0	0	0	0	0	0	0	0
AC004870.3	0	0	0	0	0	0	0	0	0	0	0	0	0	0	1.9933	0	0	0	0	0.9004	0	0.8836	0	0	0	1.2904	0.9132	0	0	0	0	0	0	0	0	0	0	0	0	0	0	0	0	0	0	0	0	0	0
AC004870.4	3.8418	0	0	0	1.4033	1.2422	2.8817	0	3.8645	0	4.0634	6.5532	2.2756	7.9169	1.9933	3.3718	9.231	2.2992	0	0.9004	3.1372	6.1854	6.5567	11.0252	2.5411	20.6464	2.7395	12.7558	0	6.4952	0.9077	23.7778	0	0.798	1.956	1.5534	6.953	0.8912	7.0539	3.1454	1.7991	0.779	2.8127	0	0	2.3949	4.7742	7.6706	0
AC004870.5	0	0	0	0	1.4033	1.2422	14.4086	0	0.9661	1.7919	0	7.6454	0	2.639	2.99	1.1239	0	7.6641	0	3.6015	1.0457	9.7199	1.8733	11.0252	2.5411	14.1944	0	6.3779	1.6443	7.5778	2.723	0.9511	0	0.798	0.978	0	7.9463	0	8.1391	1.5727	11.6941	0	0	0	0.8731	0.7983	7.5023	3.0683	29.6412
AC004875.1	0	0	0	0	0	0	0	0	0	0	0	0	0	0	0	0	0	0	0	0	0	0	0	0	0	0	0	0	0	0	0	0	0	0	0	0	0	0	0	0	0	0	0	0	0	0	0	0	0
AC004878.2	72.9936	186.161	24.3711	41.1494	42.1002	38.5078	54.7526	40.6437	27.0516	37.6299	36.5706	56.7946	31.8583	47.5016	38.8701	43.8333	54.0675	49.8165	50.8624	16.2068	23.0065	27.3926	44.9599	31.2379	21.5997	41.2928	27.3952	17.8581	13.1542	22.7333	12.7072	20.9245	18.2498	15.1627	6.8461	6.2136	12.9128	16.041	15.7357	15.7268	12.5937	9.3486	13.1261	10.9477	11.3505	14.3691	13.6405	10.7389	5.9282
AC004878.8	6.4029	14.5438	4.6868	4.4486	9.8234	7.4531	11.5269	10.4215	3.8645	16.1271	5.4179	5.461	3.4134	6.5974	6.9767	7.8675	5.2749	7.6641	15.2587	1.8008	3.1372	5.3018	1.8733	2.7563	3.8117	5.1616	4.5659	3.8267	5.755	4.3302	0.9077	0	4.8026	1.5961	0.978	3.1068	2.9799	0.8912	1.6278	3.1454	0	0.779	1.8752	0.782	5.2387	6.3863	0	0.7671	0
AC004893.10	46.1012	119.259	56.2411	36.7008	39.2935	37.2656	40.344	81.2875	35.7468	53.7569	54.1787	43.6882	25.0316	40.9041	31.8934	37.0897	60.6611	26.8243	55.9487	20.7087	41.83	26.5089	37.4666	43.1818	60.9873	42.5832	21.9162	25.5116	26.3085	18.4031	29.9526	45.6534	34.5785	38.3057	33.2525	13.9805	38.7383	10.694	23.8748	30.6673	21.5891	17.9181	29.065	14.8576	8.7312	15.1674	17.7326	29.9155	0
AC004895.4	0	0	1.8747	0	1.4033	0	0	2.0843	0	0	0	1.0922	1.1378	3.9585	0	1.1239	0	2.2992	0	0	0	0	0	0	0	3.8712	1.8263	1.2756	0.8221	1.0825	0	0.9511	0.9605	0	0	0	0	0.8912	0.5426	0	0	0.779	0	1.564	0	0	0	0.7671	5.9282
AC004899.3	0	0	0	1.1121	0	0	0	0	0	0	1.3545	1.0922	0	0	0	1.1239	0	0	0	1.8008	0	0	0	0	0	0	0.9132	2.5512	0	0	0	0	0	0	2.934	0	0	0	0	0	0	2.3371	0	0	0	0.7983	1.364	0.7671	0
AC004901.1	0	0	0	0	0	0	0	0	0.9661	0	0	0	1.1378	0	3.9867	2.2479	0	1.5328	0	0	0	1.7673	0.9367	0	0	3.8712	0.9132	2.5512	0	0	0	0	0	0.798	0	0	0	0	3.7983	1.5727	0	0	0	0	0	0	1.364	0.7671	0
AC004906.3	10.2447	0	5.6241	3.3364	2.8067	4.9688	0	2.0843	0.9661	5.3757	9.4813	7.6454	3.4134	1.3195	0.9967	2.2479	0	0	10.1725	5.4023	6.2745	6.1854	2.81	1.8375	2.5411	1.2904	3.6527	2.5512	6.5771	3.2476	7.2612	8.56	4.8026	3.1921	1.956	2.3301	0	0.8912	2.1704	3.1454	0	1.5581	0	6.2558	0.8731	6.3863	3.4101	11.5059	0
AC004911.2	1.2806	0	0	0	0	0	0	0	0	0	0	0	0	0	0	0	0	0	0	0	0	0	0	0	0	0	0	0	0	0	0	0	0	0	0	0	0	0	0	0	0	0	0	0	0	0	0	0	0
AC004920.2	0	0	0	0	0	0	0	0	0	0	0	0	0	0	0	0	0	0	0	0	0	0	0	0	0	0	0	0	0	0	0	0	0	0	0	0	0	0	0	0	0	0	0	0	0	0	0	0	0
AC004920.3	0	0	0	0	0	0	0	0	0	0	0	0	0	0	0	0	0	0	0	0	0	0	0	0	0	0	0	0	0	0	0	0	0	0	0	0	0	0	0	0.7863	0	0	0	0	0	0	0.682	3.0683	0
AC004924.1	0	0	0	1.1121	0	0	0	0	0	0	0	0	0	0	0	0	0	0.7664	0	0	0	0.8836	0	0	0	0	0	0	0	0	0	0	0	0	0	0	0	0	0	0	0	0	0	0	0	0	0	0	0
AC004938.5	0	0	0	0	0	0	0	0	0	0	0	0	0	0	0	0	0	0	0	0	0	0	0	0	0	0	0	0	0	0	0	0	0	0	0	0	0	0	0	0	0	0	0	0	0	0	0	0	0
AC004941.3	2.5612	0	0	2.2243	0	1.2422	0	0	0	0	2.7089	1.0922	1.1378	2.639	0	0	0	0	0	0	0	0	0	0.9188	2.5411	0	1.8263	0	0	3.2476	0.9077	0	0	0	0	0	1.9866	0	0.5426	0	0	0	0	0	0	0	0	0	0
AC004941.5	0	0	0	0	0	0	0	0	0	0	0	0	0	0	0	0	0	0	0	0	0	0	0	0	0	0	0	0	0	0	0	0	0	0	0	0	0	0	0	0	0	0	0	0	0	0	0	0	0
AC004943.1	0	0	1.8747	0	0	3.7266	2.8817	0	0	1.7919	0	0	0	0	0	0	0	0	0	6.3026	0	0	0	0	0	0	0	0	0	0	0	0	0	0	0	0	0	0	0	0	0	0	0	0	0	0	0.682	0	0
AC004945.1	69.1518	11.6351	36.5567	11.1215	39.2935	83.2266	46.1075	67.7396	52.171	17.919	62.3055	72.0855	50.0631	29.0287	78.7368	62.9401	75.167	82.7721	25.4312	121.551	50.1959	35.3452	27.1633	54.207	34.3053	68.3911	40.1797	26.7871	4.1107	15.1555	14.5225	44.7022	45.1442	13.5666	14.6702	23.3009	40.7249	49.9052	37.9826	36.1717	26.0869	7.7905	6.5631	34.4071	44.5289	29.5365	19.7787	31.4496	0
AC004947.2	0	14.5438	0.9374	0	1.4033	1.2422	0	1.0421	0	0	1.3545	3.2766	0	1.3195	11.96	2.2479	2.6374	3.832	23.3967	12.6053	2.0915	1.7673	0.9367	12.8627	2.5411	10.3232	7.3054	7.6535	4.1107	19.4857	1.8153	7.6089	2.8815	0.798	1.956	1.5534	18.8725	0	2.1704	17.2995	12.5937	4.6743	21.5643	4.6919	1.7462	0	18.4146	2.3012	0
AC004951.5	14.0865	20.3614	7.4988	18.9065	23.8568	4.9688	28.8172	17.7165	20.2887	17.919	10.8357	14.1987	11.378	27.7092	4.9833	19.1068	7.9123	21.4594	16.276	40.517	10.4575	10.6036	29.9733	11.9439	7.6234	14.1944	10.9581	14.0314	0	9.7428	3.6306	8.56	10.5657	11.1725	2.934	2.3301	12.9128	6.2381	2.1704	9.4361	2.6986	6.2324	4.6879	6.2558	6.9849	14.3691	5.4562	5.3694	17.7847
AC004951.6	544.251	599.206	513.668	600.559	499.589	495.633	536	467.924	394.181	603.87	479.482	603.989	513.147	672.939	462.454	701.332	414.078	460.611	475.055	663.578	336.731	350.801	287.556	522.776	203.291	596.164	384.447	304.863	169.361	252.231	143.41	173.102	161.367	229.834	166.262	178.64	107.275	293.193	322.852	337.341	129.535	180.739	108.759	210.352	193.832	451.829	154.819	215.545	373.478
AC004967.7	0	2.9088	2.8121	0	5.6134	1.2422	20.172	2.0843	1.9323	5.3757	5.4179	3.2766	1.1378	1.3195	1.9933	0	9.231	4.5985	1.0172	1.8008	1.0457	2.6509	2.81	0	2.5411	0	4.5659	0	1.6443	3.2476	0.9077	0	0.9605	0	3.9121	0.7767	2.9799	1.7823	0	0	1.7991	0.779	0.9376	0.782	0.8731	2.3949	0	2.3012	0
AC004969.1	0	0	0	0	0	0	0	0	0	0	0	0	0	0	0	0	0	0	0	0	0	0	0	0	0	0	0	0	0	0	0	0	0	0	0	0	0	0	0	0	0	0	0	0	0	0	0	0	0
AC004980.1	0	0	0	0	0	0	0	0	0	0	0	0	0	0	0	0	0	0	0	0	0	0	0	0	0	0	0	0	0	0	0	0	0	0	0	0	0	0	0	0	0	0	0	0	0	0	0	0	0
AC004980.10	21.77	2.9088	10.3109	21.1308	29.4701	27.3281	11.5269	10.4215	4.8307	7.1676	8.1268	6.5532	7.9646	14.5144	17.94	8.9914	13.1872	19.9266	14.2415	14.406	1.0457	11.4872	20.6066	18.3753	6.3528	15.4848	8.2186	6.3779	5.755	6.4952	4.5383	7.6089	10.5657	2.3941	5.8681	5.4369	7.9463	0.8912	5.9687	8.6498	8.0959	2.3371	1.8752	24.2413	8.7312	11.9743	12.2764	7.6706	5.9282
AC004980.11	184.405	381.048	187.47	147.916	179.628	155.274	86.4515	157.364	106.274	188.149	208.588	192.228	279.898	219.035	175.414	203.431	253.194	112.662	136.311	127.853	127.581	101.618	115.21	188.346	132.139	267.113	141.542	100.771	65.7712	80.1078	94.3962	71.3334	75.8807	88.5819	60.6369	79.2231	81.4498	134.566	114.49	79.4205	56.6715	70.8932	70.3184	103.221	51.5138	99.7855	42.2855	102.786	35.5694
AC004980.7	340.637	741.735	420.871	325.859	482.749	284.461	1195.91	397.058	204.82	324.334	350.807	255.576	265.107	302.163	302.987	282.106	203.083	502.764	495.4	392.564	163.137	329.594	295.05	186.509	196.938	299.373	174.416	156.896	266.373	171.041	155.209	224.462	202.669	134.07	162.35	191.067	188.725	521.331	189.37	326.332	231.184	172.948	195.954	401.937	196.451	583.546	268.717	240.091	2264.58
AC004980.8	0	0	0	0	0	0	0	0	0	0	0	0	0	0	0	0	0	0	0	0	0	0	0	0	0	0	0	0	0	0	0	0	0.9605	0	0	0	0	0	0	0	0	0	0	0	0	0	0	0	0
AC004980.9	0	0	0	0	0	3.7266	0	3.1264	0	1.7919	0	0	6.8268	0	3.9867	2.2479	2.6374	3.832	1.0172	1.8008	0	0.8836	0.9367	0	0	6.452	1.8263	0	0.8221	0	1.8153	0.9511	0	0	0.978	0	0.9933	0	0.5426	1.5727	0	0	2.8127	0	3.4925	3.1931	0.682	0	5.9282
AC004985.12	16.6477	14.5438	17.8097	35.5887	35.0835	6.2109	51.8709	3.1264	4.8307	17.919	13.5447	14.1987	18.2048	31.6677	25.9134	19.1068	10.5498	25.2915	9.1552	53.1222	10.4575	13.2545	17.7966	15.619	10.1645	12.904	11.8713	12.7558	4.9328	5.4127	9.9842	5.7067	12.4867	7.9803	4.8901	12.4272	11.9195	7.1293	22.247	11.0088	20.6896	3.8952	2.8127	2.3459	3.4925	41.5108	3.4101	3.0683	82.9952
AC004987.10	0	0	0	0	0	0	0	0	0	0	0	1.0922	0	0	0	0	0	0	0	0	0	0	0	0	0	0	0	0	0	0	0	0	0	0	0	0	0	0	0	0	0	0	0	0	0	0.7983	0	0	0
AC004987.9	17.9283	5.8175	19.6844	11.1215	11.2267	8.6953	5.7634	6.2529	8.6952	19.7109	9.4813	13.1064	10.2402	14.5144	7.9733	5.6197	1.3187	12.2625	7.1207	12.6053	10.4575	9.7199	1.8733	22.9691	5.0823	10.3232	6.3922	12.7558	4.9328	11.9079	4.5383	0.9511	12.4867	12.7686	6.8461	6.9903	4.9664	0.8912	9.2244	11.0088	1.7991	10.9066	8.4382	7.8198	3.4925	7.9828	10.9124	13.0401	0
AC004988.1	105.008	1105.33	126.542	14.4579	51.9236	1278.21	8.6452	664.89	21.2549	245.49	196.398	332.03	75.0947	38.2651	225.247	68.5598	59.3424	20.693	282.795	741.911	107.712	34.4616	18.7333	67.9884	210.914	416.799	219.162	47.1964	85.5026	40.0539	167.009	29.4845	80.6833	169.183	96.8234	132.815	102.309	119.416	34.727	143.114	186.206	85.6951	402.221	21.1134	161.526	98.9872	77.7507	65.9674	189.703
AC005000.1	0	0	0	0	0	0	0	0	0	0	0	0	0	0	0	0	0	0	0	0	0	0	0	0	0	0	0	0	0	0	0	0	0	0	0	0	0	0	0	0	0	0	0	0	0	0	0	0	0
AC005007.3	3.8418	14.5438	9.3735	7.785	9.8234	4.9688	2.8817	9.3793	3.8645	7.1676	0	6.5532	4.5512	3.9585	4.9833	5.6197	5.2749	5.3649	6.1035	6.3026	6.2745	7.069	7.4933	8.2689	7.6234	1.2904	3.6527	2.5512	3.2886	5.4127	4.5383	12.3645	3.8421	3.1921	6.8461	4.6602	6.953	2.6735	1.0852	3.9317	3.5982	3.8952	6.5631	3.1279	0.8731	2.3949	4.0921	3.0683	0
AC005008.2	0	0	0	0	0	0	0	8.3372	0	1.7919	0	0	0	0	0	0	0	0	0	0	0	0	0	0	0	0	0	0	0	0	0	0	0	0	0	0	0	0	0	0	0	0	0	0	0	0	0	0	0
AC005008.3	0	0	0	0	0	0	0	20.8429	0	0	0	0	0	0	0	0	0	0	0	0	0	0	0	0	0	0	0	0	0	0	0	0	0	0	0	0	0	0	0	0	0	0	0	0	0	0	0	0	0
AC005009.1	0	0	0	0	0	0	0	0	0	0	0	0	0	0	0	0	0	0	1.0172	0	0	0	0	0	0	0	0	0	0	0	0	0	0	0	0	0	0	0	0	0	0	0	0	0	0	0	0	0	0
AC005009.2	0	0	0.9374	0	0	0	0	0	0	1.7919	0	0	0	1.3195	0	1.1239	0	0.7664	0	0	0	0	1.8733	0	1.2706	3.8712	0	2.5512	0	1.0825	0.9077	0	0	0.798	0	0.7767	1.9866	0	1.0852	0	0.8995	0.779	0	0	0	0	0	0	0
AC005013.5	3.8418	8.7263	4.6868	2.2243	8.42	2.4844	0	3.1264	0.9661	1.7919	0	5.461	5.689	11.8754	5.98	8.9914	5.2749	7.6641	1.0172	4.5019	5.2287	8.8363	3.7467	10.1064	5.0823	5.1616	4.5659	5.1023	3.2886	8.6603	2.723	8.56	1.921	0	3.9121	0.7767	3.9732	1.7823	9.767	1.5727	7.1964	3.1162	3.7503	3.9099	0	3.9914	5.4562	0.7671	0
AC005014.5	2.5612	14.5438	2.8121	3.3364	11.2267	21.1172	0	7.295	3.8645	7.1676	5.4179	4.3688	5.689	9.2364	10.9634	3.3718	3.9562	4.5985	3.0517	15.3064	4.183	10.6036	4.6833	3.6751	11.4351	3.8712	3.6527	3.8267	1.6443	5.4127	1.8153	0	5.7631	8.7784	0.978	9.3204	3.9732	4.4558	2.1704	0.7863	1.7991	1.5581	8.4382	8.6018	3.4925	2.3949	4.0921	5.3694	0
AC005017.2	0	0	0	0	0	0	0	0	0	0	0	0	0	0	0	0	0	0	0	0	0	0	0	0	0	0	0	0	0	0	0	0	0	0	0	0	0	0	0	0	0	0	0	0	0	0	0	0	0
AC005019.2	3.8418	0	0.9374	0	0	0	0	1.0421	0	0	5.4179	2.1844	0	0	0	0	0	0.7664	1.0172	0	0	0	0	0	0	0	0	0	0	0	0	0	0	0	0	0	0	0	0	0	0	0	0	0	0	0	0	0.7671	0
AC005019.3	0	0	0	0	0	0	0	4.1686	0	1.7919	0	0	0	0	0	0	0	0	0	0	0	0	0	0	0	0	0	0	0.8221	0	0	0	0	0	0	0	0	0	0	0	0	0	0	0	0	0	0	0.7671	0
AC005020.1	0	0	0	0	0	0	0	0	0	0	0	0	0	0	0	0	0	0	0	0	0	0	0	0	0	0	0	0	0	0	0	0	0	0	0	0	0	0	0	0	0	0	0	0	0	0	0	0	0
AC005033.6	0	0	0	0	0	0	0	0	0	0	0	0	0	0	0.9967	1.1239	0	0	0	3.6015	0	0	0.9367	0	0	0	0	1.2756	0	1.0825	0	0	0	0	0	0	0	0	0	0	0	0	0	0	0	0	1.364	0	0
AC005034.2	0	0	0	0	1.4033	0	0	0	0	0	0	0	0	0	0	1.1239	0	0	1.0172	0	0	0	0	0	0	0	0	0	0	0	0	0	0	0	0	0	0	0	0	0	0	0	0	0.782	0	0	0	0	0
AC005037.1	0	0	0	0	0	0	0	0	0	0	0	0	0	0	0	0	0	0	0	0	0	0	0	0	0	0	0	0	0	0	0	0	0	0	0	0	0	0	0	0	0	0	0	0	0	0	0	0	0
AC005037.3	1.2806	34.9052	1.8747	15.5701	4.21	7.4531	37.4623	3.1264	5.7968	12.5433	5.4179	4.3688	7.9646	13.1949	11.96	5.6197	7.9123	8.4305	4.069	37.8158	9.4117	5.3018	8.43	6.4313	3.8117	11.6136	2.7395	5.1023	4.9328	3.2476	4.5383	1.9022	2.8815	2.3941	6.8461	2.3301	2.9799	17.8233	9.2244	14.1541	2.6986	0.779	1.8752	9.3837	2.6193	13.5708	5.4562	2.3012	112.636
AC005037.4	15.3671	5.8175	2.8121	3.3364	12.6301	13.6641	2.8817	3.1264	4.8307	5.3757	14.8992	5.461	3.4134	6.5974	4.9833	6.7436	19.7808	12.2625	4.069	6.3026	8.366	12.3708	8.43	6.4313	11.4351	12.904	7.3054	11.4802	3.2886	6.4952	8.1689	8.56	1.921	3.1921	7.8241	6.2136	9.9329	7.1293	5.4261	7.8634	3.5982	7.0114	7.5006	6.2558	3.4925	2.3949	2.7281	4.6024	0
AC005037.6	7.6835	2.9088	0.9374	2.2243	2.8067	4.9688	0	1.0421	0.9661	0	5.4179	4.3688	1.1378	2.639	4.9833	1.1239	1.3187	2.2992	0	0.9004	0	0.8836	0.9367	8.2689	2.5411	10.3232	0.9132	2.5512	1.6443	2.1651	0	5.7067	0	0.798	0.978	1.5534	0	0.8912	1.6278	3.9317	0.8995	1.5581	0.9376	1.564	0.8731	0.7983	0.682	3.0683	0
AC005040.3	0	0	0	0	0	0	0	0	0	0	0	0	0	0	0	0	0	0	0	0	0	0	0	0	0	0	0	0	0	0	0	0	0	0	0	0	0	0	0	0	0	0	0	0	0	0	0	0	0
AC005041.11	0	0	1.8747	1.1121	0	0	0	0	0	3.5838	0	2.1844	0	0	0	0	0	0	0	0	0	1.7673	0	0	0	0	0	2.5512	0	2.1651	0	0.9511	0	0	0	0	0	0	0.5426	0	0	0	0	0	0	0	0.682	0.7671	0
AC005042.2	64.0295	154.165	32.8073	76.7381	46.3102	99.375	89.3333	27.0958	68.5952	43.0055	56.8877	39.3193	58.0277	46.1821	72.7568	46.0811	67.2547	63.6119	30.5175	62.126	67.9737	40.647	59.0099	33.9942	53.3638	56.7775	38.3533	63.7789	23.0199	40.0539	30.8603	51.36	27.8549	20.7489	21.5163	29.5145	42.7115	87.3341	22.247	84.9249	35.0823	38.1733	9.3758	28.1512	20.9548	41.5108	48.4237	37.5861	23.7129
AC005042.3	0	0	0	0	0	0	0	0	0	0	0	0	0	0	0	0	0	0	0	0	0	0	0	0	0	0	0	0	0	0	0	0	0	0	0	0	0	0	0	0	0	0	0	0	0	0	0	0	0
AC005042.4	349.601	1178.05	183.721	270.252	269.441	650.907	210.365	90.6668	303.365	313.582	331.845	257.76	212.768	205.84	255.147	250.637	498.476	272.075	229.898	256.607	323.136	171.424	228.546	320.648	335.43	668.427	228.294	335.477	82.214	201.352	181.531	272.018	129.67	90.1779	164.306	168.543	150.98	265.567	100.925	290.946	185.307	221.249	141.575	154.832	96.9159	55.0816	122.082	158.015	47.4258
AC005042.5	0	0	0	0	0	0	0	0	0	0	0	0	0	0	0	0	0	0	0	0	0	0	0	0.9188	0	0	0	0	0	0	0	0	0	0	0	0	0	0	0	0	0	0	0	0	0	0	0	0.7671	0
AC005048.1	0	0	0	0	0	0	0	0	0	0	0	0	0	0	0	0	0	0	0	0	0	0	0	0	0	0	0	0	0	0	0	0	0	0	0	0	0	0	0	0	0	0	0	0	0	0	0	0	0
AC005062.2	32.0147	0	31.8699	31.1401	8.42	26.0859	0	12.5058	15.4581	10.7514	16.2536	9.8298	25.0316	26.3898	17.94	24.7265	18.4621	17.6274	15.2587	2.7011	32.4182	22.9744	28.1	16.5377	17.7879	30.9696	29.2216	24.236	18.0871	24.8984	2.723	12.3645	18.2498	15.9607	29.3404	20.9708	7.9463	12.4763	22.247	31.4537	3.5982	32.7199	44.0662	20.3314	27.9397	7.9828	32.0551	17.6424	5.9282
AC005071.1	1.2806	0	0	0	0	0	2.8817	2.0843	1.9323	1.7919	0	2.1844	0	2.639	0	0	0	0	1.0172	0.9004	0	0	0	0	0	1.2904	0	0	0	0	0	0	0	0	0	0	0	0	0	0	0	0	0	0	0	0	0	0	0
AC005076.5	0	0	1.8747	0	1.4033	9.9375	2.8817	2.0843	0.9661	0	1.3545	0	1.1378	5.278	0	1.1239	1.3187	3.832	0	5.4023	0	1.7673	0.9367	1.8375	0	1.2904	1.8263	2.5512	6.5771	0	0	3.8044	1.921	0	0.978	0.7767	0	3.5647	0.5426	2.359	0	0	2.8127	2.3459	2.6193	1.5966	3.4101	5.3694	5.9282
AC005077.12	3.8418	8.7263	1.8747	0	1.4033	1.2422	0	3.1264	0	7.1676	2.7089	1.0922	1.1378	1.3195	0.9967	0	0	4.5985	0	2.7011	1.0457	1.7673	0.9367	1.8375	1.2706	2.5808	0.9132	0	2.4664	1.0825	0.9077	0.9511	1.921	0	0	0.7767	0	0.8912	2.1704	4.718	0.8995	0	0	3.1279	0.8731	0.7983	1.364	1.5341	5.9282
AC005077.14	17.9283	5.8175	2.8121	5.5607	12.6301	13.6641	25.9355	33.3487	0.9661	12.5433	4.0634	5.461	6.8268	10.5559	16.9434	6.7436	7.9123	9.9633	7.1207	37.8158	5.2287	7.9527	11.24	7.3501	8.894	10.3232	8.2186	6.3779	11.51	4.3302	3.6306	3.8044	7.6841	15.9607	7.8241	6.2136	6.953	0.8912	10.3096	7.8634	16.1918	9.3486	1.8752	4.6919	4.3656	9.5794	6.1382	3.0683	23.7129
AC005077.5	0	0	0	0	0	0	0	0	0	0	0	0	0	0	0	0	0	0	0	0.9004	0	0	0	0	0	0	0	0	0	0	0	0	0	0	0	0	0	0	0	0	0	0	0	0	0	0	0	0	0
AC005077.7	0	0	0	0	0	0	0	2.0843	0	0	0	0	0	0	0	0	0	0	1.0172	0.9004	0	0	0	0	0	0	0	0	0	0	0	0	0	0.798	0	0	0	0	0	0	0	0	0.9376	0.782	0	0.7983	0	0	0
AC005077.8	1.2806	0	0	0	0	1.2422	0	0	1.9323	0	1.3545	0	0	0	0.9967	1.1239	1.3187	0	1.0172	0	0	0.8836	0	1.8375	0	0	0	0	0	0	0	0	0	0	0	0.7767	0.9933	0	0.5426	0	0	0	0	0	0	0	0	1.5341	0
AC005077.9	0	0	0	0	0	0	0	0	0	0	0	0	0	0	0	0	0	0	0	0	0	0	0	0	0	0	0	0	0	0	0	0	0	0	0	0	0	0	0	0	0	0	0	0	0	0	0	0	0
AC005082.12	14.0865	2.9088	15.935	31.1401	5.6134	14.9063	17.2903	30.2223	29.95	57.3407	1.3545	43.6882	71.6813	7.9169	81.7268	38.2136	73.8483	107.297	13.2242	36.9155	69.0194	38.8798	29.0366	39.5068	58.4461	45.164	16.4371	63.7789	87.969	55.2094	9.0766	87.5023	23.0524	88.5819	45.9667	127.378	43.7048	73.9666	29.8435	69.9844	35.0823	5.4533	5.6255	75.8519	68.9762	14.3691	49.7877	32.2166	41.4976
AC005083.1	2.5612	5.8175	3.7494	17.7944	12.6301	3.7266	0	0	0.9661	0	0	1.0922	26.1694	2.639	8.97	17.9829	18.4621	12.2625	5.0862	2.7011	19.8692	4.4182	4.6833	9.1876	11.4351	7.7424	26.4821	14.0314	4.1107	31.3936	15.4301	16.1689	0	1.5961	6.8461	10.0971	11.9195	24.9526	13.0226	5.5044	1.7991	14.0228	12.1885	23.4594	5.2387	0	15.6865	4.6024	0
AC005088.1	0	0	0	0	0	0	0	0	0	0	0	0	0	0	0	0	0	0	0	0	0	0	0	0	0	0	0	0	0	0	0	0	0	0	0	0	0	0	0	0	0	0	0	0	0	0	0	0	0
AC005094.2	0	0	0	0	0	0	0	0	0	0	0	0	0	0	0	0	0	0	0	0	0	0	0	0	0	0	0	0	0	0	0	0	0	0	0	0	0	0	0	0	0	0	0.9376	0	0	0	0	0	0
AC005102.1	0	0	0	0	0	0	0	0	0	0	0	0	0	0	0	0	0	0	0	0	0	0	0	0	0	0	0	0	0	0	0	0	0	0	0	0	0	0	0	0	0	0	0	0	0	0.7983	0	0	0
AC005104.3	70.4324	40.7227	10.3109	12.2336	28.0668	16.1484	11.5269	8.3372	12.5597	14.3352	29.7983	30.5817	11.378	10.5559	17.94	17.9829	22.4182	12.2625	19.3277	4.5019	15.6862	10.6036	22.48	25.7254	25.4114	34.8408	14.6108	12.7558	4.9328	6.4952	7.2612	13.3156	22.0918	11.9705	9.7801	12.4272	13.9061	5.347	14.6504	8.6498	5.3973	9.3486	20.6267	4.6919	5.2387	3.9914	3.4101	6.1365	5.9282
AC005105.2	25.6118	61.0841	14.0603	46.7102	29.4701	4.9688	72.0429	4.1686	22.221	25.0866	25.7349	37.1349	12.5158	26.3898	38.8701	34.8418	44.8365	24.5251	13.2242	6.3026	18.8235	19.4399	16.86	7.3501	6.3528	12.904	19.1767	1.2756	14.7985	10.8254	31.7679	15.2178	1.921	3.1921	11.7362	9.3204	8.9396	5.347	9.767	14.9405	27.886	9.3486	5.6255	39.8809	5.2387	0	3.4101	9.2048	0
AC005150.1	0	0	0	0	0	0	0	1.0421	0	0	0	0	0	0	0	0	0	0.7664	0	0	0	0	0	0.9188	0	0	0	0	0	0	0	0	0	0	0	0	0	0	0	0	0	0	0	0	0	0	0	0	0
AC005152.3	0	0	0	0	0	0	0	0	0	0	0	0	0	0	0	0	0	0	0	0	0	0	0	0	0	0	0	0	0	0	0	0	0	0	0	0	0	0	0	0	0	0	0	0	0	0	0	0	0
AC005154.6	1608.42	3062.93	1105.14	1231.15	1425.79	2403.63	1239.14	1865.44	1347.75	2377.85	1694.44	2719.59	1236.79	1463.31	1827.89	1519.55	2003.14	1140.42	2430.21	1143.48	1634.51	1199.97	1203.62	1721.76	1147.32	2468.53	1255.62	1526.87	786.788	1188.63	1173.6	975.841	1435.97	1072.56	732.533	1514.56	1350.87	787.789	924.606	1317.91	2451.27	1121.05	932.891	609.161	1256.41	933.992	1022.35	925.845	640.249
AC005154.7	84.5189	238.519	63.7399	64.5045	64.5537	111.797	51.8709	79.2032	55.0694	173.814	143.574	140.894	76.2325	58.0575	102.657	87.6666	97.5853	102.699	146.484	102.643	86.7972	74.225	56.1999	102.901	69.8812	110.974	63.9222	84.1882	43.5734	70.365	27.2297	38.9956	59.5519	44.6899	43.0326	67.5726	59.5974	54.361	59.1444	58.9756	144.827	55.3123	50.6293	28.9332	46.2751	41.5108	54.5619	55.2285	47.4258
AC005154.8	20.4894	66.9016	12.1856	8.8972	14.0334	31.0547	0	19.8008	17.3903	16.1271	27.0894	17.4753	14.7914	7.9169	5.98	12.3632	23.737	10.7297	25.4312	0.9004	12.549	10.6036	4.6833	17.4565	11.4351	15.4848	3.6527	15.3069	9.0435	10.8254	8.1689	15.2178	8.6446	5.5862	7.8241	8.5437	9.9329	8.0205	7.5965	16.5132	22.4887	12.4647	16.8764	0.782	4.3656	4.7897	10.2304	12.273	0
AC005159.1	0	2.9088	0	0	0	0	0	0	0	0	0	0	0	0	0	0	0	0	0	0	0	0	0	0	0	0	0	0	0	0	0	0	0	0	0	0	0	0	0	0	0	0	0	0	0	0	0	0	0
AC005160.3	0	40.7227	0.9374	0	0	19.875	0	13.5479	0	7.1676	2.7089	3.2766	0	1.3195	5.98	1.1239	1.3187	0	6.1035	8.1034	0	2.6509	0	0	1.2706	5.1616	0.9132	1.2756	0	1.0825	0.9077	0	1.921	3.9902	1.956	0	0	0	0.5426	0	0	0.779	7.5006	0.782	0.8731	0	0	0.7671	0
AC005162.4	6.4029	5.8175	2.8121	4.4486	0	0	2.8817	7.295	1.9323	1.7919	8.1268	2.1844	1.1378	2.639	1.9933	2.2479	1.3187	1.5328	2.0345	1.8008	4.183	1.7673	0.9367	0.9188	0	0	1.8263	2.5512	2.4664	0	0.9077	0.9511	0	2.3941	1.956	0	0.9933	0.8912	1.0852	0.7863	0	0	1.8752	1.564	0	0.7983	0	0.7671	0
AC005162.5	3.8418	0	1.8747	1.1121	5.6134	3.7266	2.8817	1.0421	2.8984	1.7919	1.3545	6.5532	1.1378	7.9169	13.9534	3.3718	6.5936	3.0656	2.0345	8.1034	2.0915	5.3018	1.8733	10.1064	16.5174	15.4848	4.5659	7.6535	6.5771	11.9079	1.8153	14.2667	1.921	1.5961	4.8901	3.8835	3.9732	0.8912	3.7983	6.2907	0	4.6743	1.8752	3.1279	0.8731	2.3949	5.4562	0	0
AC005176.1	0	0	0	0	0	0	0	0	0	0	0	0	0	0	0	0	0	0	0	0	0	0	0	0	0	0	0	0	0	0	0	0	0	0	0	0	0	0	0	0	0	0	0	0	0	0	0	0	0
AC005176.2	0	0	0	0	1.4033	0	0	0	0	0	0	0	0	0	0	0	0	0	0	0	0	0.8836	0	0	0	0	0.9132	0	0	0	0	0	0	0	1.956	0	0	0	0	0	0	0	0	0	0	0	0	0	0
AC005176.3	0	0	0	0	0	0	0	0	0	0	0	0	0	0	0	0	0	0	0	0	0	0	0	0	0	0	0	0	0	0	0	0	0	0	0	0	0	0	0	0	0	0	0	0	0	0	0	0	0
AC005178.1	0	0	0	0	0	2.4844	0	0	0	0	0	0	0	0	0	0	0	0.7664	0	0	0	1.7673	0	0	0	5.1616	0	0	0	1.0825	0	0.9511	0	0	0	0	0	0	0	0.7863	0	0	0	0	0	0	0	0	0
AC005189.6	2.5612	2.9088	0.9374	0	0	4.9688	0	8.3372	0.9661	1.7919	1.3545	1.0922	3.4134	3.9585	3.9867	0	3.9562	2.2992	1.0172	0.9004	0	0	0.9367	0	0	5.1616	0	0	0.8221	1.0825	1.8153	0.9511	0	2.3941	1.956	1.5534	0	0.8912	0.5426	1.5727	2.6986	1.5581	3.7503	0	1.7462	0	0.682	4.6024	0
AC005197.2	1.2806	0	3.7494	0	7.0167	0	0	0	1.9323	0	5.4179	0	0	1.3195	0	0	0	0.7664	2.0345	0.9004	0	0.8836	0.9367	3.6751	0	0	0.9132	0	0	0	0	0	0	0	0.978	0	0	0	0.5426	1.5727	0	0.779	0.9376	0	0	1.5966	1.364	0	0
AC005220.3	0	0	0	4.4486	2.8067	1.2422	0	2.0843	0	0	0	0	2.2756	0	3.9867	0	0	1.5328	2.0345	0	0	0	0.9367	0	0	1.2904	3.6527	3.8267	0	4.3302	0	0	1.921	0	0.978	1.5534	1.9866	0.8912	0.5426	0.7863	1.7991	0.779	0.9376	0	1.7462	0	0.682	0.7671	0
AC005224.2	5.1224	2.9088	2.8121	6.6729	15.4367	23.6016	5.7634	8.3372	19.3226	1.7919	4.0634	8.7376	12.5158	11.8754	10.9634	11.2393	10.5498	7.6641	4.069	16.2068	14.6405	6.1854	7.4933	18.3753	19.0585	18.0656	14.6108	8.929	2.4664	8.6603	8.1689	6.6578	10.5657	9.5764	4.8901	10.8738	9.9329	16.041	13.0226	7.8634	8.9955	6.2324	0.9376	3.9099	18.3354	8.7811	8.8663	2.3012	11.8565
AC005229.1	0	2.9088	0	0	0	0	0	1.0421	0	3.5838	1.3545	1.0922	0	0	0.9967	0	0	0	0	0	0	0	0	0.9188	0	0	0	0	0	1.0825	0.9077	0	0	0.798	0	0	0	0	0	0	0	0	0	0	0	0	0	0	0
AC005229.5	0	0	0	0	1.4033	0	0	0	0	0	0	0	0	0	0	0	0	0	0	0	0	0	0	0	0	0	0	0	0	0	0	0	0	0	0	0	0	0	0	0	0	0	0	0	0	0	0	0	0
AC005229.7	0	0	0	0	0	0	0	0	0	0	0	0	0	0	0	0	0	0	0	0	0	0	0	0	0	0	0	0	0	0	0	0	0	0	0	0	0	0	0	0	0	0	0	0	0	0	0	0	0
AC005235.1	0	2.9088	0	0	1.4033	3.7266	0	0	0	1.7919	0	0	4.5512	0	0	1.1239	0	0.7664	0	1.8008	0	0	0	3.6751	0	2.5808	0	0	0	1.0825	0	0	0	0	0.978	0	0	0.8912	0.5426	1.5727	0	0	0.9376	0.782	0	0	0	0	0
AC005237.2	0	0	0	1.1121	1.4033	0	0	0	0	0	0	0	0	1.3195	0.9967	0	0	0.7664	0	0.9004	0	0	0	0	0	1.2904	0	0	0.8221	0	0	0	0.9605	0	0	0	0	0	0	0.7863	0	0	0	0.782	0	0	0	0	5.9282
AC005237.4	14.0865	5.8175	6.5615	1.1121	5.6134	16.1484	0	7.295	2.8984	5.3757	9.4813	24.0285	3.4134	5.278	7.9733	5.6197	0	2.2992	1.0172	3.6015	3.1372	4.4182	4.6833	5.5126	5.0823	11.6136	1.8263	2.5512	3.2886	1.0825	2.723	0	7.6841	2.3941	0.978	1.5534	3.9732	7.1293	4.3409	3.9317	6.2968	0.779	3.7503	0.782	5.2387	3.9914	8.8663	6.1365	5.9282
AC005251.3	7.6835	11.6351	3.7494	6.6729	5.6134	4.9688	0	3.1264	0.9661	3.5838	17.6081	3.2766	5.689	2.639	1.9933	6.7436	2.6374	7.6641	3.0517	4.5019	11.5032	7.069	5.62	8.2689	1.2706	0	9.1317	11.4802	4.9328	8.6603	1.8153	0	7.6841	9.5764	5.8681	3.1068	0	5.347	7.0539	3.9317	3.5982	5.4533	12.1885	2.3459	0.8731	7.1846	4.7742	3.8353	0
AC005253.2	145.987	119.259	88.111	77.8503	70.167	89.4375	69.1612	102.13	69.5614	164.855	107.003	95.0217	69.4057	117.434	87.7068	91.0384	164.84	83.5385	80.3626	82.8347	75.2939	88.3631	115.21	90.9575	99.1043	90.3279	75.7935	85.4637	74.8148	75.7777	56.2746	80.8445	82.6043	56.6605	72.3731	60.5824	92.376	62.3815	74.3374	48.7532	80.9592	66.998	38.4408	75.8519	51.5138	86.2147	73.6586	70.5698	112.636
AC005253.4	0	0	0	0	0	0	0	0	0	0	0	0	0	0	0	0	0	0	0	0	0	0	0	0	0	0	0	0	0	0	0	0	0	0	0	0	0	0	0	0	0	0	0	0	0	0	0	0	0
AC005255.3	1.2806	23.2701	2.8121	4.4486	4.21	6.2109	2.8817	6.2529	6.7629	0	12.1902	12.0142	9.1024	10.5559	2.99	4.4957	3.9562	3.0656	9.1552	1.8008	4.183	8.8363	3.7467	2.7563	3.8117	6.452	5.479	3.8267	8.2214	4.3302	2.723	2.8533	3.8421	11.1725	9.7801	3.1068	0.9933	1.7823	3.2557	3.9317	12.5937	2.3371	15.9388	0	0.8731	3.9914	2.0461	5.3694	0
AC005255.5	0	0	0	0	0	0	0	0	0	1.7919	0	0	0	0	0	0	0	0.7664	0	0	0	0	0	0	0	0	0	0	0	0	0	0	0	0.798	0	0	0	0	0	0.7863	0	0	0.9376	0	0	0	0	0	0
AC005255.6	0	0	0	0	0	0	0	0	0	1.7919	0	0	0	0	0	0	0	0	0	0.9004	0	0	0	0.9188	0	0	0	0	0	0	0	0	0	0.798	0	0	0	0	0	0	0	0	0	0	0	0	0	0	0
AC005256.1	0	0	0	0	0	0	0	0	0	0	0	0	0	0	0	0	0	0	0	0	0	0	0	0	0	0	0	0	0	0	0	0	0	0	0	0	0	0	0	0	0	0	0	0	0	0	0	0	0
AC005262.2	0	0	0	0	0	0	40.344	0	0	0	0	0	0	0	0	0	0	0	0	0	0	0	0	0	0	0	0	0	0	0	0	0	0	0	0	0	0	0	0	0	0	0	0	0	0	0	0	0	17.7847
AC005262.3	0	0	0	0	0	0	0	1.0421	0	0	0	0	0	1.3195	0	0	0	0	0	0	0	0	0	0	0	0	0	0	0	1.0825	0	0	0	1.5961	0	0	0	0	1.0852	0	0	0	0	0	0	3.9914	0	0	0
AC005262.4	1.2806	0	0	0	0	0	0	1.0421	0	0	0	0	0	0	0	0	0	0	0	0	0	0	0	2.7563	0	0	0	0	0	0	0	0	0	0	0	0	0	0	0	0	0	0	0	0	0	0	1.364	0	0
AC005264.2	53.7848	11.6351	7.4988	20.0186	22.4534	6.2109	28.8172	11.4636	15.4581	28.6704	12.1902	19.6597	3.4134	9.2364	4.9833	5.6197	26.3744	4.5985	4.069	9.0038	7.3202	2.6509	30.91	14.7002	12.7057	10.3232	6.3922	3.8267	7.3993	5.4127	15.4301	16.1689	9.6052	9.5764	11.7362	8.5437	6.953	2.6735	11.3948	2.359	20.6896	7.7905	5.6255	2.3459	4.3656	43.1073	6.1382	2.3012	23.7129
AC005276.1	0	0	0	0	0	0	0	1.0421	0	3.5838	0	0	0	0	0	0	0	0	0	0	3.1372	0	0	0	0	0	0	0	0	0	0	0	0.9605	0	0	0	0	0	0	0	0	0	0	0	0	0	0	0.7671	0
AC005281.1	5.1224	78.5367	14.9976	81.1867	81.3937	13.6641	5.7634	14.5901	110.139	1.7919	21.6715	7.6454	12.5158	21.1118	19.9334	42.7094	88.3542	42.9189	25.4312	0.9004	59.6077	30.0434	30.91	23.8878	2.5411	23.2272	16.4371	8.929	5.755	12.9905	34.4909	36.1422	0	2.3941	5.8681	83.8833	17.8792	3.5647	9.767	108.515	33.2832	14.8019	103.134	89.1456	5.2387	0	4.7742	57.5297	0
AC005281.2	10.2447	8.7263	20.6217	20.0186	16.8401	6.2109	34.5806	0	30.9162	0	5.4179	4.3688	1.1378	11.8754	15.9467	13.4872	42.199	26.8243	9.1552	42.3177	17.7777	7.9527	14.9866	13.7814	10.1645	20.6464	13.6976	15.3069	3.2886	20.5682	15.4301	25.68	0	2.3941	2.934	7.767	12.9128	0.8912	15.193	15.7268	8.0959	3.1162	7.5006	32.0611	0	7.1846	20.4607	6.9036	11.8565
AC005284.1	0	0	0	0	0	0	0	0	0	0	0	0	0	0	0	0	0	0	0	0	0	0	0	0	0	0	0	0	0	0	0	0	0	0	0	0	0	0	0	0	0	0	0	0	0	0	0	0	0
AC005288.1	0	0	0	0	0	0	0	0	0	0	0	0	0	0	0	0	0	0	0	0	0	0	0	0	0	0	0	0	0	0	0	0	0	0	0	0	0	0	0	0	0	0	0	0	0	0	0	0	0
AC005300.5	0	0	1.8747	0	5.6134	1.2422	0	0	0.9661	5.3757	0	3.2766	7.9646	0	3.9867	0	1.3187	0	0	0	2.0915	3.5345	3.7467	0.9188	0	3.8712	0	0	4.1107	1.0825	1.8153	2.8533	0	1.5961	0.978	0.7767	3.9732	0	1.0852	0	1.7991	0.779	0	3.1279	0	0.7983	0.682	0.7671	5.9282
AC005301.8	0	0	0	0	0	0	0	0	0.9661	0	0	0	0	0	0	0	0	0	0	0	0	0	0	0	0	0	0.9132	2.5512	0	3.2476	0	0	0	0	0	0	0	0	0	0.7863	0	0	0	17.2035	0	0.7983	0	0	0
AC005304.1	2.5612	0	0.9374	0	0	0	0	2.0843	0	0	0	1.0922	1.1378	0	0	0	0	0.7664	1.0172	0	0	2.6509	0	0	0	0	0	2.5512	0	0	0	0	0	0.798	0.978	0	0.9933	0.8912	0	0	0	0	0	0.782	0	0	0	0	0
AC005306.3	0	8.7263	2.8121	11.1215	0	6.2109	31.6989	6.2529	14.492	10.7514	1.3545	4.3688	11.378	2.639	18.9367	11.2393	0	10.7297	10.1725	26.1109	8.366	9.7199	9.3667	0	5.0823	0	6.3922	3.8267	5.755	4.3302	1.8153	0	0	0	0	12.4272	0	18.7144	23.3322	10.2224	11.6941	0	0.9376	2.3459	3.4925	33.5279	6.8202	16.8754	17.7847
AC005307.1	0	0	0	0	0	2.4844	0	0	0	0	0	0	0	0	0	0	1.3187	0	0	0	0	0	0	0	0	0	0	0	0	1.0825	0	0	0	0	0	2.3301	0	0	0.5426	0	0	0	0	1.564	0	0	0.682	0	0
AC005307.3	1.2806	0	0	0	0	1.2422	0	0	0	0	1.3545	0	3.4134	0	0.9967	1.1239	1.3187	2.2992	0	0.9004	0	0	0	0	0	0	0.9132	1.2756	0	0	0	0	0	0.798	0	0	0	0	0.5426	0.7863	0.8995	0	0	0.782	0	0.7983	0	0	0
AC005324.6	0	0	0	0	0	0	0	0	0	0	0	2.1844	0	0	0	0	0	0	1.0172	0	0	0	0	0	0	0	0	0	0	0	0	0.9511	0	0	0	0	0.9933	0	0	0	0	0	0	0	0	0	0	0	0
AC005324.7	0	0	0	0	0	0	0	0	0	0	0	0	0	0	0	0	0	0	0	0	0	0	0	0	0	0	0	0	0	0	0	0	0	0	0	0	0	0	0	0	0	0	0	0	0	0	0	0	0
AC005329.7	28.173	69.8104	46.8676	41.1494	61.747	55.8985	138.322	28.138	37.6791	71.6759	12.1902	56.7946	48.9253	44.8626	70.7635	74.1794	22.4182	104.231	44.7589	123.352	43.9215	58.3196	44.0233	56.9633	38.117	46.4544	47.4851	70.1568	18.0871	29.2285	27.2297	42.8	10.5657	23.143	22.4943	18.6407	70.5236	72.1843	77.0505	35.3854	37.781	3.8952	2.8127	26.5873	48.8945	38.3176	45.6956	22.2448	41.4976
AC005330.2	0	0	0	0	0	0	0	14.5901	0	0	0	0	0	0	0	0	1.3187	0	0	1.8008	0	0	0	0.9188	0	0	0	0	0	0	0	1.9022	0.9605	0.798	0.978	0	0	0.8912	0.5426	0	0	0	0	0	0.8731	0	0	0.7671	0
AC005336.4	5.1224	2.9088	1.8747	2.2243	2.8067	0	8.6452	0	0	0	2.7089	3.2766	2.2756	35.6262	0	12.3632	7.9123	3.0656	2.0345	0.9004	2.0915	8.8363	15.9233	2.7563	2.5411	47.7448	1.8263	16.5825	29.5971	7.5778	18.1531	11.4133	2.8815	1.5961	2.934	5.4369	0	18.7144	23.3322	5.5044	1.7991	119.194	1.8752	43.0088	0	1.5966	0	2.3012	5.9282
AC005336.5	0	0	0	0	0	2.4844	0	0	0.9661	3.5838	0	2.1844	0	1.3195	1.9933	1.1239	0	1.5328	1.0172	2.7011	0	4.4182	13.1133	1.8375	5.0823	3.8712	0.9132	1.2756	0.8221	1.0825	0.9077	1.9022	0.9605	0.798	0	0	0.9933	0.8912	2.713	1.5727	0	0	0	0	0	1.5966	0	0	0
AC005339.2	0	8.7263	7.4988	4.4486	0	0	0	0	0	0	8.1268	0	2.2756	0	0	0	3.9562	0	0	0	3.1372	0.8836	0	4.5938	0	9.0328	0.9132	2.5512	8.2214	0	0.9077	2.8533	1.921	1.5961	0	0	0	0	0	3.1454	0	8.5695	8.4382	0	0	0	3.4101	9.2048	0
AC005351.1	2.5612	2.9088	0	1.1121	0	0	0	0	0	0	2.7089	0	0	0	0.9967	0	0	0.7664	0	0	0	1.7673	0	2.7563	1.2706	0	0.9132	0	1.6443	0	0	1.9022	0	0.798	0	0	0	0	0	0.7863	0.8995	0	0	1.564	0	0	0	2.3012	0
AC005355.1	0	0	0	0	0	2.4844	0	1.0421	0	0	0	0	1.1378	0	0.9967	0	0	0	3.0517	0	0	0	0	0	1.2706	0	0.9132	0	1.6443	0	0	0.9511	0	0	0	0	0	0	0	2.359	1.7991	0	0	0	0	0.7983	0	0	0
AC005355.2	1.2806	8.7263	3.7494	5.5607	1.4033	11.1797	20.172	4.1686	0.9661	5.3757	1.3545	7.6454	22.756	9.2364	10.9634	14.6111	3.9562	10.7297	9.1552	12.6053	5.2287	7.9527	0.9367	7.3501	15.2468	12.904	7.3054	5.1023	7.3993	4.3302	6.3536	3.8044	0	15.1627	6.8461	13.9805	6.953	19.6056	5.4261	9.4361	7.1964	14.8019	9.3758	7.0378	6.1118	0.7983	5.4562	3.0683	0
AC005357.1	0	0	0	0	0	0	0	0	0	0	0	0	0	0	0	0	0	0	0	0	0	0	0	0	0	0	0	0	0	0	0	0	0	0	0	0	0	0	0	0	0	0	0	0	0	0	0	0	0
AC005358.3	7.6835	29.0877	3.7494	1.1121	0	2.4844	0	2.0843	1.9323	0	1.3545	3.2766	0	1.3195	1.9933	3.3718	6.5936	2.2992	2.0345	0.9004	3.1372	0.8836	2.81	36.7505	3.8117	5.1616	0	2.5512	1.6443	2.1651	3.6306	2.8533	22.0918	10.3745	9.7801	0.7767	2.9799	0	8.6817	5.5044	9.895	1.5581	2.8127	0	0	7.1846	0.682	1.5341	0
AC005363.11	0	0	0.9374	1.1121	0	0	0	1.0421	0.9661	0	1.3545	0	0	0	0	1.1239	0	0.7664	0	0	0	0	0	1.8375	0	0	0	0	2.4664	0	0.9077	0	0	0	0	0.7767	0	0	0.5426	0	0	0	0	0.782	0	0	0	0.7671	5.9282
AC005363.9	2.5612	0	0	4.4486	0	6.2109	0	1.0421	0	0	0	7.6454	0	0	0	0	11.8685	0	0	0	0	0	0	4.5938	11.4351	2.5808	0	3.8267	0	6.4952	3.6306	3.8044	0	0	0	1.5534	1.9866	0	0	0	6.2968	0	0	3.1279	0	0	0	5.3694	0
AC005375.1	0	0	0	0	0	0	0	0	0	0	0	0	0	0	0	0	0	0	0	0	0	0	0	0	0	0	0	0	0	0	0	0	0	0	0	0	0	0	0	0	0	0	0	0	0	0	0	0	0
AC005387.2	5.1224	5.8175	4.6868	3.3364	4.21	3.7266	0	4.1686	3.8645	3.5838	0	1.0922	0	2.639	5.98	2.2479	1.3187	2.2992	4.069	3.6015	1.0457	3.5345	1.8733	3.6751	6.3528	2.5808	0	0	4.1107	2.1651	0.9077	0	1.921	0.798	0	1.5534	0.9933	0.8912	0.5426	2.359	2.6986	0.779	0	0.782	0	1.5966	0.682	0	0
AC005387.3	3.8418	0	1.8747	2.2243	2.8067	1.2422	5.7634	0	0.9661	1.7919	2.7089	1.0922	1.1378	0	2.99	2.2479	1.3187	1.5328	3.0517	10.8045	1.0457	0	0.9367	1.8375	0	1.2904	0	1.2756	0	1.0825	0.9077	0	0.9605	0.798	0	1.5534	0	0.8912	2.1704	0.7863	1.7991	1.5581	0	0	0.8731	2.3949	0	0.7671	11.8565
AC005391.2	1.2806	0	0	1.1121	0	0	0	3.1264	0.9661	3.5838	2.7089	0	2.2756	0	0.9967	2.2479	0	2.2992	1.0172	4.5019	0	0	0	0	0	0	0	0	0.8221	1.0825	0	0	1.921	0	0	0	0	0	0.5426	0	0	0.779	0	0	0.8731	0	0.682	0.7671	0
AC005392.13	0	0	0	0	0	1.2422	2.8817	5.2107	0	41.2136	0	72.0855	14.7914	0	7.9733	0	0	4.5985	2.0345	16.2068	10.4575	1.7673	0	8.2689	0	1.2904	0.9132	0	0	0	0	0.9511	24.9734	11.9705	6.8461	6.9903	0	17.8233	2.1704	0	3.5982	7.7905	0	3.9099	42.7827	2.3949	0.682	6.9036	35.5694
AC005394.1	0	0	0	0	0	0	0	0	0	0	0	0	0	0	0	0	0	0	0	0	0	0	0	0	0	0	0	0	0	0	0	0	0	0	0.978	0	0	0	0	0	0	0	0	0	0	0	0	0	0
AC005480.1	0	0	0	1.1121	0	0	0	0	0	0	0	0	0	0	0	0	0	0	0	0	0	0	0	0	0	0	0	0	0	0	0	0	0	0	0	0	0	0	0	0	0	0	0	0	0	0	0	0	0
AC005481.5	24.3312	5.8175	4.6868	21.1308	8.42	55.8985	2.8817	4.1686	18.3565	69.884	4.0634	12.0142	1.1378	7.9169	1.9933	1.1239	38.2429	3.832	6.1035	14.406	9.4117	6.1854	13.1133	7.3501	105.457	180.656	0.9132	5.1023	9.0435	3.2476	2.723	769.449	89.3279	15.1627	1.956	1.5534	1.9866	2.6735	3.2557	4.718	4.4977	1.5581	0	2.3459	2.6193	9.5794	2.0461	46.7908	0
AC005487.2	0	0	0	0	0	0	0	1.0421	0.9661	3.5838	0	3.2766	0	0	0.9967	0	0	0	4.069	0	0	0	0	0.9188	0	2.5808	0.9132	0	0	0	0	0	0	1.5961	0	0	2.9799	1.7823	0	0	0	1.5581	0.9376	0.782	1.7462	0	1.364	0.7671	0
AC005488.11	5.1224	2.9088	1.8747	2.2243	2.8067	6.2109	11.5269	1.0421	2.8984	5.3757	0	3.2766	7.9646	2.639	5.98	2.2479	0	3.0656	2.0345	1.8008	3.1372	1.7673	0	2.7563	2.5411	3.8712	4.5659	2.5512	0.8221	2.1651	0.9077	0	0	1.5961	0.978	0.7767	0	1.7823	3.2557	0	0	0.779	0.9376	1.564	0	0.7983	1.364	0	0
AC005498.3	0	2.9088	3.7494	1.1121	0	0	0	0	0.9661	1.7919	1.3545	1.0922	4.5512	0	2.99	1.1239	2.6374	3.832	0	0.9004	1.0457	0.8836	5.62	0	0	2.5808	0	0	1.6443	2.1651	0.9077	3.8044	0.9605	0.798	0.978	0.7767	0.9933	0	0.5426	4.718	2.6986	0.779	0.9376	1.564	0.8731	0.7983	1.364	0.7671	0
AC005498.4	0	0	0	0	1.4033	2.4844	0	0	2.8984	0	1.3545	3.2766	0	0	0	0	0	0	0	0	1.0457	1.7673	0.9367	0	1.2706	0	0	0	0	0	0	0	1.921	0.798	0	0.7767	0.9933	0	0	0	0.8995	0.779	0.9376	0.782	0.8731	0	0.682	0	0
AC005510.3	0	0	0	0	0	0	0	0	0	0	0	0	0	0	0	0	0	0	0	0	0	0	0	0	0	0	0	0	0	0	0	0	0	0	0	0	0	0	0	0	0	0	0	0	0	0	0	0	0
AC005513.1	0	0	0	0	0	0	0	0	0	0	0	0	0	0	0	0	0	0	0	0	0	0	0	0	0	0	0	0	0	0	0	0	0	0	0	0	0	0	0	0	0	0	0	0	0	0	0	0	0
AC005514.2	0	5.8175	0	0	0	1.2422	0	0	0	1.7919	0	0	0	0	0	1.1239	0	0	0	1.8008	0	0	0	0	1.2706	0	1.8263	0	0.8221	0	0	0	0	0	0	0	0	0	0	0	0	0	0	0	1.7462	0	0.682	0	0
AC005517.3	76.8354	43.6315	26.2458	40.0373	37.8902	50.9297	34.5806	22.9272	41.5436	30.4623	70.4323	52.4258	40.9607	43.5431	56.8101	39.3376	61.9798	56.7142	47.8107	29.7124	39.7385	40.647	34.6566	36.7505	45.7404	60.6487	30.1348	30.6139	18.0871	32.4761	21.7837	61.8223	40.3416	15.1627	31.2965	30.2912	17.8792	24.9526	28.2157	31.4537	12.5937	22.5923	10.3134	25.8053	14.843	17.5622	15.0045	13.0401	5.9282
AC005518.2	0	2.9088	0.9374	0	0	0	0	2.0843	0	1.7919	0	4.3688	1.1378	1.3195	0	1.1239	0	0	10.1725	1.8008	0	0	0.9367	0	0	0	0	0	0	1.0825	0	1.9022	0	0	0	0	10.9262	0	0	0.7863	0	0	14.0637	0	2.6193	0	12.2764	0.7671	0
AC005519.4	125.498	157.073	44.9929	78.9624	81.3937	137.883	25.9355	56.2759	72.4598	107.514	58.2421	120.142	79.6459	91.0447	76.7435	92.1623	146.378	72.8088	94.6041	139.558	59.6077	45.0652	70.2499	115.764	81.3163	139.363	63.9222	73.9835	41.107	62.7872	64.4435	92.2578	38.4206	39.9017	43.0326	59.029	76.4833	74.8578	66.1983	86.4976	89.9547	55.3123	45.9414	28.9332	30.5591	38.3176	37.5113	33.7508	23.7129
AC005522.6	0	0	0	0	0	0	0	0	0	0	0	0	0	0	0	0	0	0	0	0	0	0	0	0	0	0	0	0	0	0	0	0	0	0	0	0	0	0	0	0.7863	0	0	0	0	0	0	0	0	0
AC005522.7	10.2447	43.6315	19.6844	5.5607	26.6635	14.9063	0	12.5058	7.729	10.7514	4.0634	18.5675	4.5512	10.5559	13.9534	23.6025	19.7808	7.6641	20.345	1.8008	4.183	7.069	9.3667	10.1064	12.7057	25.808	8.2186	5.1023	10.6878	5.4127	9.0766	4.7556	16.3288	10.3745	2.934	6.9903	16.8859	7.1293	8.6817	9.4361	8.0959	6.2324	3.7503	10.1657	6.1118	9.5794	0.682	13.0401	0
AC005523.2	185.685	418.862	336.509	358.111	275.055	265.828	501.419	441.87	362.299	379.882	115.13	335.307	332.237	361.54	314.947	256.256	203.083	303.498	327.554	237.7	247.843	272.158	275.38	231.528	467.569	161.3	316.872	293.383	285.283	363.733	246.882	292.942	376.522	266.544	386.316	280.388	353.611	354.683	320.682	325.545	304.947	181.518	247.521	343.289	446.162	330.49	253.031	703.397	0
AC005523.3	0	0	0	0	0	0	0	1.0421	0	0	0	1.0922	0	0	0	0	0	2.2992	4.069	0	0	0.8836	0	0	1.2706	0	0	0	0	0	0	0	0	0	0	0	0	0.8912	0.5426	0	0.8995	0	0	0	0	0	0	0	0
AC005532.5	0	0	0	0	0	4.9688	0	9.3793	2.8984	5.3757	2.7089	1.0922	1.1378	1.3195	0.9967	3.3718	1.3187	3.832	2.0345	0	1.0457	1.7673	0	0	0	2.5808	1.8263	3.8267	0	1.0825	1.8153	0	0.9605	2.3941	0	0.7767	0	1.7823	0.5426	0	0	0	0.9376	2.3459	0	1.5966	2.0461	0.7671	0
AC005534.6	2.5612	14.5438	5.6241	2.2243	7.0167	3.7266	0	0	4.8307	10.7514	6.7723	2.1844	10.2402	1.3195	2.99	1.1239	2.6374	3.832	4.069	0	2.0915	3.5345	4.6833	8.2689	11.4351	14.1944	6.3922	5.1023	4.9328	0	4.5383	0	3.8421	0.798	1.956	4.6602	0	0.8912	1.6278	4.718	0.8995	4.6743	10.3134	1.564	5.2387	0.7983	5.4562	7.6706	5.9282
AC005534.8	1.2806	0	0.9374	0	0	3.7266	2.8817	0	0.9661	0	2.7089	2.1844	1.1378	0	1.9933	2.2479	5.2749	1.5328	0	2.7011	1.0457	0.8836	3.7467	3.6751	2.5411	1.2904	3.6527	0	1.6443	5.4127	0	0	6.7236	1.5961	0.978	3.1068	1.9866	0	0	1.5727	0	1.5581	0.9376	2.3459	4.3656	0	4.0921	0.7671	5.9282
AC005537.2	5.1224	29.0877	16.8723	13.3458	1.4033	0	0	2.0843	3.8645	0	8.1268	4.3688	1.1378	7.9169	1.9933	7.8675	7.9123	21.4594	8.138	1.8008	1.0457	5.3018	7.4933	4.5938	8.894	1.2904	0	0	1.6443	1.0825	0	2.8533	0	0.798	6.8461	0	12.9128	3.5647	0	19.6585	0	2.3371	18.7516	35.971	0	0	3.4101	19.1766	0
AC005538.3	10.2447	11.6351	16.8723	23.3551	32.2768	16.1484	11.5269	4.1686	0	26.8785	14.8992	7.6454	0	1.3195	3.9867	0	17.1434	0	28.483	0	16.732	10.6036	15.9233	3.6751	15.2468	2.5808	0	12.7558	1.6443	0	17.2455	13.3156	12.4867	5.5862	0	0	39.7316	0	5.9687	38.5307	14.3928	9.3486	16.8764	26.5873	29.6859	7.9828	8.1843	52.1603	0
AC005538.5	0	0	0	0	0	0	0	0	0	1.7919	1.3545	0	0	0	0	0	0	0.7664	0	0	0	0	0	0	0	0	0	0	0	0	0	0	0	0.798	0	0	0	0	0	0	0	0	0	0	0	0	0	0	0
AC005539.2	1.2806	0	0	2.2243	4.21	2.4844	0	0	0.9661	0	4.0634	7.6454	3.4134	3.9585	2.99	4.4957	3.9562	2.2992	0	4.5019	2.0915	8.8363	5.62	6.4313	7.6234	9.0328	3.6527	2.5512	0	3.2476	0.9077	3.8044	0	0	6.8461	0.7767	3.9732	0	2.713	3.9317	0	2.3371	1.8752	6.2558	5.2387	0	7.5023	1.5341	0
AC005540.3	181.844	133.803	137.791	471.55	195.064	29.8125	2711.7	37.5173	142.987	121.849	56.8877	45.8726	92.1617	154.38	54.8168	48.329	101.541	493.567	59.0004	1133.57	38.6927	69.8068	197.636	82.6886	44.4699	24.5176	29.2216	14.0314	43.5734	30.3111	16.3378	50.4089	21.1313	11.9705	30.3184	28.7378	39.7316	279.825	105.266	54.2576	26.9864	18.6971	18.7516	49.2647	20.0817	1221.37	32.0551	69.8027	6224.64
AC005546.2	11.5253	2.9088	2.8121	3.3364	8.42	6.2109	2.8817	1.0421	4.8307	7.1676	8.1268	6.5532	2.2756	6.5974	1.9933	4.4957	5.2749	0.7664	4.069	1.8008	2.0915	3.5345	3.7467	0	2.5411	10.3232	7.3054	2.5512	4.1107	2.1651	0.9077	6.6578	0	0	0.978	0.7767	0	0	2.713	0	0.8995	0	2.8127	0.782	0.8731	0.7983	2.7281	0.7671	5.9282
AC005549.1	0	0	0	0	0	0	0	0	0	0	0	0	0	0	0	0	0	0	0	0	0	0	0	0	0	0	0	0	0	0	0	0	0	0	0	0	0	0	0	0	0	0	0	0	0	0	0	0	0
AC005549.2	0	0	0	0	0	0	0	0	0	0	0	0	0	0	0	0	0	0	0	0	0	0	0	0	0	0	0	0	0	0	0	0	0	0	0	0	0	0	0	0	0	0	0	0	0	0	0	0	0
AC005550.3	0	0	0	0	2.8067	4.9688	0	5.2107	19.3226	0	5.4179	2.1844	0	0	5.98	3.3718	1.3187	0	9.1552	2.7011	2.0915	0.8836	7.4933	6.4313	8.894	1.2904	2.7395	3.8267	2.4664	2.1651	0.9077	0	33.618	5.5862	4.8901	1.5534	0.9933	0	0	7.0771	7.1964	13.2438	0	0	0	0	1.364	0.7671	0
AC005550.5	0	0	0	0	0	0	0	0	0	0	0	0	0	0	0	0	0	0	0	0	0	0	0	0	0	0	0	0	0	0	0	0	0	0	0	0	0	0	0.5426	0	0	0	0	0	0	0	0	0	0
AC005559.3	1.2806	0	0.9374	0	2.8067	0	0	19.8008	0.9661	3.5838	0	15.2909	1.1378	0	0	1.1239	0	0.7664	0	13.5057	0	0	0	0.9188	0	1.2904	0	1.2756	0.8221	0	0	0	4.8026	0	0	0	0	0	0.5426	0	0	0	0	0	0.8731	5.588	0.682	0	35.5694
AC005562.1	40.9789	148.347	60.9278	45.598	87.0071	136.641	25.9355	43.7702	56.0355	55.5488	135.447	53.518	120.607	102.92	56.8101	48.329	36.9242	47.5173	60.0177	17.1072	34.5097	53.0178	50.5799	25.7254	59.7167	104.522	80.3594	62.5033	54.2613	56.292	69.8895	33.2889	48.9863	99.7544	62.5929	76.1163	47.6779	65.9461	52.6331	90.4293	62.0688	77.1256	89.07	60.2124	69.8493	39.1159	60.7001	59.8309	47.4258
AC005578.3	3.8418	0	0	0	2.8067	0	0	1.0421	0.9661	0	1.3545	2.1844	0	0	0	1.1239	0	2.2992	0	0	0	0	0.9367	0.9188	0	3.8712	0	0	0.8221	0	0	0.9511	0.9605	0	0.978	0	0	0.8912	2.713	0.7863	0.8995	3.1162	0.9376	0.782	1.7462	0.7983	2.7281	2.3012	0
AC005588.2	8.9641	0	0	20.0186	26.6635	42.2344	5.7634	6.2529	2.8984	41.2136	17.6081	52.4258	21.6182	31.6677	19.9334	14.6111	2.6374	3.832	1.0172	20.7087	7.3202	5.3018	6.5567	1.8375	3.8117	16.7752	9.1317	6.3779	4.9328	9.7428	6.3536	1.9022	10.5657	12.7686	7.8241	2.3301	0	0	0	1.5727	3.5982	1.5581	0	2.3459	9.6043	0	1.364	3.0683	5.9282
AC005592.1	8.9641	8.7263	0.9374	1.1121	1.4033	6.2109	0	15.6322	3.8645	0	1.3545	12.0142	19.3426	0	4.9833	2.2479	3.9562	0	2.0345	0.9004	2.0915	3.5345	0.9367	10.1064	10.1645	11.6136	7.3054	3.8267	0.8221	3.2476	3.6306	2.8533	4.8026	2.3941	5.8681	2.3301	0.9933	141.695	2.1704	2.359	3.5982	1.5581	9.3758	0.782	16.5892	0	6.1382	2.3012	0
AC005592.2	25.6118	23.2701	9.3735	3.3364	5.6134	17.3906	2.8817	12.5058	3.8645	16.1271	14.8992	43.6882	9.1024	11.8754	5.98	3.3718	7.9123	3.0656	4.069	5.4023	4.183	11.4872	3.7467	13.7814	3.8117	11.6136	3.6527	5.1023	1.6443	7.5778	3.6306	6.6578	7.6841	3.1921	7.8241	3.1068	2.9799	2.6735	5.9687	4.718	7.1964	1.5581	2.8127	7.0378	2.6193	7.1846	3.4101	4.6024	0
AC005592.3	3.8418	2.9088	1.8747	0	0	2.4844	0	2.0843	0.9661	3.5838	0	1.0922	1.1378	0	4.9833	4.4957	3.9562	1.5328	0	2.7011	1.0457	6.1854	5.62	8.2689	5.0823	11.6136	7.3054	7.6535	0	6.4952	2.723	2.8533	0.9605	2.3941	5.8681	0.7767	5.9597	0	1.0852	2.359	5.3973	2.3371	1.8752	0	0	0	4.7742	0	5.9282
AC005593.2	0	0	1.8747	0	0	1.2422	0	3.1264	0	5.3757	2.7089	0	0	0	0	1.1239	0	0.7664	1.0172	0.9004	0	0.8836	0.9367	0	0	1.2904	0	0	2.4664	0	1.8153	0	0.9605	0	1.956	2.3301	0	0	0.5426	0	0.8995	0	0	0.782	0	0	1.364	0	0
AC005597.1	0	5.8175	0.9374	0	0	0	0	0	0	1.7919	0	0	0	0	0	0	0	0	0	0	0	0	1.8733	0	0	0	0	0	0	0	0	0	0	0	0	0	2.9799	0	1.0852	0	0	0.779	0	0	0	0	0.682	0	0
AC005606.14	0	17.4526	0	6.6729	12.6301	0	23.0537	5.2107	0	26.8785	2.7089	2.1844	4.5512	0	0	0	7.9123	0.7664	2.0345	0	9.4117	2.6509	0	10.1064	2.5411	3.8712	0	2.5512	0	7.5778	6.3536	12.3645	0	9.5764	6.8461	0	6.953	0	2.1704	0	8.0959	0	13.1261	0	5.2387	0	1.364	3.8353	0
AC005606.15	0	20.3614	0	0	0	0	0	0	0	0	5.4179	0	0	0	0	0	0	0	0	0	3.1372	0	0	0	0	0	0	7.6535	0	0	0	0	0	0	0.978	5.4369	0	0	0	0	0	0	4.6879	0	0	0	1.364	0	0
AC005609.16	1.2806	0	0.9374	0	14.0334	0	0	2.0843	1.9323	1.7919	0	5.461	1.1378	0	2.99	0	14.5059	10.7297	3.0517	0	0	6.1854	0	0	0	0	0	0	4.1107	2.1651	7.2612	2.8533	0.9605	0	2.934	2.3301	0	6.2381	3.7983	0	0	1.5581	0	0	1.7462	5.588	2.7281	2.3012	11.8565
AC005609.18	0	0	0	2.2243	1.4033	1.2422	20.172	0	9.6613	0	0	0	1.1378	10.5559	1.9933	0	0	0	0	2.7011	2.0915	0	1.8733	1.8375	0	0	0	0	0	8.6603	10.8919	2.8533	1.921	3.1921	0	0	0	4.4558	0	0	12.5937	1.5581	0	6.2558	1.7462	1.5966	0	3.8353	11.8565
AC005609.2	0	0	0	0	0	0	0	0	0	0	0	0	0	0	0	0	0	0	0	0	0	0	0	0	0	0	0	0	0	0	0	0	0	0	0	0	0	0	0	0	0	0	0	0	0	0	0	0	0
AC005609.20	0	0	1.8747	0	0	0	2.8817	0	0	1.7919	0	0	0	0	0	0	1.3187	0	0	0	0	0	0	0	0	0	0	0	0	0	3.6306	0	0	0	0	0	0.9933	0	0	0.7863	0	0	0	0	0	0	0	0	0
AC005614.3	2.5612	0	4.6868	0	4.21	4.9688	0	2.0843	1.9323	0	1.3545	3.2766	3.4134	2.639	0	2.2479	0	4.5985	4.069	5.4023	8.366	0.8836	0.9367	0.9188	0	5.1616	0	3.8267	4.1107	1.0825	0	1.9022	0.9605	3.1921	0	5.4369	2.9799	3.5647	2.713	0.7863	0	4.6743	0	1.564	0.8731	2.3949	1.364	3.0683	0
AC005614.5	0	0	0	0	0	0	0	0	0	0	0	0	0	0	0	0	0	0	0	0	0	0	0	0	0	0	0	2.5512	0	0	0	0	0.9605	0	0	0	0	0	0	0	0	0	0	0	0	0	0	0	0
AC005616.1	0	0	0	0	0	6.2109	0	0	0	0	1.3545	0	2.2756	0	0	0	0	0	0	2.7011	0	1.7673	0	0	0	5.1616	0	3.8267	0	1.0825	1.8153	0	0	0	2.934	0	0.9933	0	0	0	0.8995	0	0	3.1279	0	0	0	0	0
AC005616.2	0	0	0	0	0	1.2422	0	1.0421	0	0	0	0	0	1.3195	0.9967	0	0	0	0	0	0	0.8836	0.9367	0	0	0	0	0	0	3.2476	0	0	0	0	0	0	0	0	0	5.5044	0	0.779	0	1.564	0	0	2.0461	0	0
AC005618.6	6.4029	58.1753	13.1229	3.3364	4.21	22.3594	25.9355	21.8851	3.8645	34.0461	17.6081	33.8583	34.1339	14.5144	27.9067	11.2393	25.0557	22.9923	22.3795	11.7049	84.7057	14.1381	11.24	16.5377	16.5174	16.7752	15.524	10.2046	40.2849	28.146	10.8919	11.4133	14.4077	29.5273	17.6043	31.0679	27.8121	8.9116	13.0226	51.8985	5.3973	7.0114	20.6267	3.9099	31.4322	6.3863	12.9585	90.5134	0
AC005618.8	5.1224	0	2.8121	1.1121	1.4033	0	0	0	0	1.7919	1.3545	0	0	0	0.9967	0	0	0	0	0	0	2.6509	0	0	0	6.452	23.7425	1.2756	2.4664	6.4952	0	0.9511	5.7631	0.798	14.6702	1.5534	0	0.8912	0	3.1454	0.8995	0.779	0	1.564	0	0	1.364	3.0683	0
AC005618.9	7.6835	5.8175	2.8121	11.1215	11.2267	3.7266	28.8172	8.3372	5.7968	0	10.8357	2.1844	3.4134	42.2236	8.97	16.859	15.8246	13.0289	1.0172	28.8121	16.732	1.7673	0	9.1876	3.8117	6.452	3.6527	1.2756	5.755	9.7428	3.6306	6.6578	5.7631	5.5862	2.934	0	0.9933	4.4558	8.6817	7.8634	3.5982	1.5581	0	0	13.0967	13.5708	2.0461	12.273	0
AC005621.1	0	0	0	0	0	0	0	0	0	0	0	0	0	0	0	0	0	0	0	0	0	0	0	0	0	0	0	0	0	0	0	0	0	0	0	0	0	0	0	0	0	0	0	0	0	0	0	0	0
AC005624.2	0	0	0	0	1.4033	0	0	2.0843	0	0	0	0	0	0	0	0	0	0	0	0	0	0	0	0	0	0	0	0	0.8221	0	0	0	0	0	0	0.7767	0	0	0	0	0.8995	0	0	0	0	0	0	0	0
AC005625.1	0	0	0.9374	2.2243	0	31.0547	23.0537	5.2107	1.9323	1.7919	29.7983	1.0922	126.296	15.8339	6.9767	29.2222	35.6054	176.274	10.1725	76.532	130.719	0	0.9367	0	1.2706	2.5808	0	1.2756	13.9764	1.0825	0	58.9689	6.7236	5.5862	9.7801	68.3493	2.9799	224.573	1.0852	29.0946	44.9774	18.6971	1.8752	0	1.7462	31.9314	2.0461	0	11.8565
AC005626.3	0	0	0	0	0	0	0	0	0	0	0	0	0	0	0	0	0	0	0	0	0	0	0	0	0	0	0	0	0	0	0	0	0	0	0	0	0	0	0	0	0	0	0	0	0	0	0	1.5341	0
AC005631.1	0	0	0	0	0	0	0	0	0	0	0	0	0	0	0	0	0	0	0	0	0	0	0	0	0	0	0	0	0	0	0	0	0	0	0	0	0	0	0	0	0	0	0	0	0	0	0	0	0
AC005682.5	35.8565	101.807	39.3688	34.4766	25.2601	84.4688	14.4086	91.7089	28.9839	69.884	58.2421	58.979	53.4765	23.7508	31.8934	24.7265	97.5853	21.4594	102.742	19.8083	48.1045	32.6943	31.8466	93.7138	66.0695	59.3583	32.8743	42.0941	18.0871	30.3111	31.7679	27.5822	31.697	31.9214	38.1426	27.9611	39.7316	18.7144	24.4174	27.522	47.676	25.7085	52.5044	22.6774	18.3354	23.9485	27.963	34.5178	0
AC005682.6	3.8418	8.7263	3.7494	0	2.8067	7.4531	2.8817	12.5058	2.8984	1.7919	5.4179	1.0922	1.1378	1.3195	0	4.4957	3.9562	0.7664	34.5865	2.7011	2.0915	2.6509	3.7467	4.5938	3.8117	3.8712	3.6527	5.1023	0	2.1651	4.5383	0.9511	1.921	3.1921	0.978	2.3301	2.9799	0.8912	1.0852	7.8634	4.4977	1.5581	0.9376	3.9099	0.8731	3.1931	3.4101	4.6024	0
AC005682.7	0	2.9088	2.8121	0	0	3.7266	0	2.0843	0.9661	1.7919	1.3545	1.0922	3.4134	0	1.9933	0	0	0.7664	27.4657	0	2.0915	0	0	1.8375	8.894	2.5808	0	0	0	1.0825	0.9077	0	0.9605	0.798	0.978	0	4.9664	1.7823	0	3.1454	1.7991	3.1162	0	0	0.8731	0	2.0461	4.6024	0
AC005686.1	0	0	0	0	0	0	0	0	0	0	0	0	0	0	0	0	0	0	0	0	0	0	0	0	0	0	0	0	0	0	0	0	0	0	0	0	0	0	0	0	0	0	0	0	0	0	0	0	0
AC005701.1	0	0	0	0	0	0	0	0	0	0	0	0	0	0	0	0	0	0	0	0	0	0	0	0	0	0	0	0	0	0	0	0	0	0	0	0	0	0	0	0	0	0	0	0	0	0	0	0	0
AC005702.1	0	0	0	0	0	0	0	0	0	0	0	1.0922	0	0	0	1.1239	0	0	1.0172	0	0	0	0	0	0	0	0	0	0	0	0	0	0	0	0	0	0	0	0	0	0	0	1.8752	0	0	0	0	0	0
AC005702.2	0	0	1.8747	0	0	0	0	0	0	0	0	0	0	0	0	0	0	0.7664	0	0	1.0457	0.8836	0	0	0	0	0	0	0	0	0	0	0	0	0	0	0	0	0	0	0	0	0.9376	0	0	0	0	0	0
AC005702.3	0	0	0	0	0	0	0	0	0	0	0	0	0	0	0	0	0	0.7664	0	0	0	0	0	0	0	0	0.9132	0	0	0	0	0	0	0	0.978	0.7767	0	0	0	1.5727	0.8995	0	0.9376	1.564	0	0	0	0.7671	0
AC005702.4	0	0	0	0	0	1.2422	0	0	0	0	0	0	0	0	1.9933	1.1239	0	0	0	0	0	0	0	0	0	0	0	0	0	0	0	0	0	0	0	0.7767	0	0	0	0	0	0.779	0	0	0	0	0	0	0
AC005703.2	0	0	0	0	0	0	0	0	0	0	0	0	0	0	0	0	0	0	0	0	0	0	0	0	0	0	0	0	0	0	0	0	0	0	0	0	0	0	0	0	0	0	0	0	0	0	0	0	0
AC005703.3	0	0	0	0	0	0	0	0	0	0	0	0	0	0	0	0	0	0	0	0	1.0457	0	0	0	0	0	0.9132	0	0	0	1.8153	0	0	0	0	0	0	0	0	0	0	0	0	0.782	0.8731	0	0	0	0
AC005722.4	0	0	0	0	0	0	0	0	0	1.7919	0	0	0	1.3195	0	0	0	0	0	0	0	0	0	0	0	0	0	0	0	0	0	0	0	0	0	0	0	0	0	0	0	0	0	0	0	0	0	0	0
AC005725.1	0	0	0	0	0	0	0	0	0	0	0	0	0	0	0	0	0	0	0	0	0	0	0	0	0	0	0	0	0	0	0	0	0	0	0	0	0	0	0	0	0	0	0	0	0	0	0	0	0
AC005730.2	5.1224	2.9088	0	0	4.21	0	0	12.5058	0.9661	7.1676	0	1.0922	0	1.3195	0.9967	2.2479	0	0.7664	0	4.5019	0	2.6509	0	3.6751	1.2706	0	0	1.2756	0	0	0	0	0	0	0.978	0	0.9933	0	2.1704	0	1.7991	0	1.8752	0	0	1.5966	1.364	0	0
AC005740.3	0	5.8175	3.7494	1.1121	5.6134	2.4844	0	3.1264	0.9661	1.7919	0	1.0922	0	1.3195	1.9933	1.1239	0	0	0	0	0	1.7673	0	2.7563	1.2706	2.5808	0	0	0	0	0	0	2.8815	1.5961	0.978	0	0.9933	0	0.5426	1.5727	0	0	3.7503	0	0	0	0.682	0	0
AC005740.4	3.8418	0	0.9374	1.1121	1.4033	0	0	6.2529	0.9661	3.5838	2.7089	0	0	2.639	0	2.2479	5.2749	1.5328	2.0345	0.9004	1.0457	0.8836	0.9367	2.7563	1.2706	10.3232	0.9132	0	2.4664	0	0.9077	1.9022	0.9605	2.3941	0.978	0	3.9732	0	0.5426	0	1.7991	0	0.9376	0	0	2.3949	0	2.3012	5.9282
AC005740.5	2.5612	0	0	0	1.4033	4.9688	2.8817	2.0843	0	0	0	2.1844	3.4134	0	1.9933	1.1239	0	0.7664	2.0345	0.9004	1.0457	0	0	1.8375	0	0	0	0	0.8221	0	0	0	1.921	3.1921	2.934	1.5534	0	0.8912	1.0852	0.7863	0	0	0.9376	3.1279	0.8731	0	0	3.8353	0
AC005740.6	33.2953	11.6351	13.1229	22.2429	29.4701	17.3906	2.8817	17.7165	29.95	34.0461	27.0894	19.6597	4.5512	25.0703	11.96	21.3547	14.5059	18.3938	23.3967	10.8045	11.5032	12.3708	13.1133	35.8317	21.5997	30.9696	10.9581	17.8581	12.3321	12.9905	17.2455	9.5111	9.6052	22.345	12.7142	12.4272	12.9128	6.2381	11.3948	11.7951	32.3837	13.2438	6.5631	0.782	9.6043	7.1846	17.0506	6.1365	5.9282
AC005741.2	0	0	0	0	0	0	0	0	0	0	0	0	0	0	0	0	0	0	0	0	0	0	0	0	0	0	0	0	0	0	0	0	0	0	0	0	0	0	0	0	0	0	0	0	0	0	0	0	0
AC005752.10	3.8418	0	0.9374	1.1121	0	3.7266	0	0	0	0	1.3545	1.0922	1.1378	0	1.9933	0	11.8685	0.7664	1.0172	0	3.1372	1.7673	3.7467	2.7563	5.0823	1.2904	0.9132	1.2756	0.8221	1.0825	5.4459	1.9022	1.921	0.798	0	1.5534	3.9732	0.8912	1.6278	2.359	1.7991	0.779	2.8127	0.782	1.7462	0	3.4101	0	0
AC005753.1	11.5253	17.4526	9.3735	26.6915	68.7637	9.9375	0	5.2107	11.5936	32.2542	56.8877	30.5817	6.8268	23.7508	9.9667	47.2051	7.9123	23.7587	1.0172	19.8083	4.183	15.9054	29.9733	31.2379	19.0585	47.7448	16.4371	24.236	6.5771	8.6603	9.0766	8.56	9.6052	7.1823	11.7362	1.5534	16.8859	0.8912	19.5339	8.6498	34.1828	6.2324	11.251	2.3459	5.2387	9.5794	4.0921	1.5341	0
AC005754.7	0	5.8175	2.8121	0	0	1.2422	2.8817	3.1264	0	0	0	4.3688	0	3.9585	2.99	1.1239	0	8.4305	0	0	4.183	1.7673	0	1.8375	0	0	0.9132	0	6.5771	8.6603	2.723	1.9022	0	3.1921	2.934	3.1068	6.953	0	3.2557	0	2.6986	0	0.9376	10.1657	2.6193	2.3949	2.7281	0	0
AC005754.8	12.8059	20.3614	5.6241	3.3364	2.8067	4.9688	0	5.2107	2.8984	7.1676	0	15.2909	4.5512	18.4728	34.8834	3.3718	9.231	15.3282	15.2587	3.6015	24.0522	15.0217	5.62	18.3753	12.7057	20.6464	4.5659	15.3069	20.5535	23.8158	26.322	20.9245	4.8026	7.1823	15.6482	5.4369	8.9396	0	7.0539	3.9317	14.3928	4.6743	4.6879	35.971	18.3354	3.1931	6.1382	0.7671	5.9282
AC005757.6	8.9641	14.5438	9.3735	7.785	16.8401	17.3906	8.6452	12.5058	13.5258	10.7514	60.9511	18.5675	13.6536	17.1533	20.93	11.2393	35.6054	8.4305	12.207	20.7087	13.5947	7.069	11.24	19.294	20.3291	15.4848	17.3503	5.1023	4.1107	6.4952	6.3536	7.6089	8.6446	7.1823	1.956	4.6602	2.9799	6.2381	3.7983	3.1454	8.9955	11.6857	5.6255	9.3837	10.4774	3.9914	0	13.8071	11.8565
AC005758.1	0	0	0	0	0	0	0	0	0	0	0	0	2.2756	0	0	0	0	0	0	0	0	0	0	0	0	0	0	0	0	0	0	0	0	0	0	0	0	0	0	0	0	0	0	0	0	0	0	0.7671	0
AC005772.2	0	0	0	0	0	0	0	0	0	0	0	0	0	0	0	0	0	0	0	0	0	0	0	0	0	0	0	0	0	0	0	0	0	0	0	0	0	0	0	0	0	0	0	0	0	0	0	0	0
AC005775.2	0	0	5.6241	3.3364	7.0167	1.2422	8.6452	7.295	4.8307	14.3352	2.7089	3.2766	1.1378	10.5559	5.98	6.7436	1.3187	0.7664	3.0517	0.9004	6.2745	0	1.8733	0.9188	1.2706	0	0	3.8267	2.4664	4.3302	0	1.9022	6.7236	0.798	0.978	3.8835	4.9664	5.347	1.6278	3.9317	0.8995	0.779	0.9376	2.3459	0.8731	2.3949	5.4562	19.1766	17.7847
AC005776.1	20.4894	2.9088	4.6868	12.2336	4.21	3.7266	2.8817	5.2107	4.8307	1.7919	12.1902	3.2766	5.689	7.9169	3.9867	1.1239	7.9123	3.0656	4.069	6.3026	4.183	6.1854	1.8733	4.5938	3.8117	9.0328	0.9132	2.5512	2.4664	2.1651	3.6306	0.9511	6.7236	1.5961	1.956	3.1068	0	1.7823	5.4261	2.359	5.3973	1.5581	2.8127	4.6919	0.8731	1.5966	2.7281	3.0683	0
AC005777.3	0	0	0	0	0	0	0	0	0	0	0	0	0	0	0	0	0	0.7664	0	0	0	0	0	0	0	0	0	0	0	0	0	0	0	0	0	0	0	0	0	0	0	0	0	0	0	0	0	0	0
AC005779.2	3.8418	0	0	1.1121	2.8067	2.4844	5.7634	3.1264	0	1.7919	0	1.0922	0	2.639	0	6.7436	3.9562	1.5328	1.0172	6.3026	1.0457	2.6509	0	2.7563	0	1.2904	1.8263	1.2756	0	1.0825	1.8153	0.9511	0.9605	0	0	0	0	2.6735	2.713	2.359	0	1.5581	0.9376	0.782	0	2.3949	0	1.5341	0
AC005780.1	0	0	0	0	2.8067	0	0	0	0	3.5838	0	0	0	0	0	0	0	0	0	0	0	0	0	0	0	0	0	0	0	0	0	0	0	0	0	0.7767	0	0	0	0	0	0	0	0	0	0	0	0	0
AC005783.1	0	0	0	0	0	0	0	0	0	0	0	0	0	0	0	0	0	0	0	0	0	0	0	0	0	0	0	0	0	0	0	0	0	0	0	0	0	0	0	0	0	0	0	0	0	0	0	0	0
AC005785.2	40.9789	78.5367	41.2435	40.0373	57.537	31.0547	152.731	29.1801	48.3065	96.7625	23.026	52.4258	39.8229	42.2236	36.8767	43.8333	31.6493	106.531	37.6382	111.647	15.6862	37.9961	41.2133	24.8066	29.2231	30.9696	24.6557	22.9604	26.3085	21.6508	15.4301	31.3867	43.2232	16.7587	27.3844	13.2038	34.7651	122.09	36.8974	25.9493	24.2878	10.9066	10.3134	22.6774	24.4472	150.876	23.1888	36.819	1464.27
AC005786.3	0	0	0	0	0	0	0	0	0	0	0	0	0	0	0	0	0	0	0	0	0	0	0	0	0	0	0	0	0	0	0	0	0	0	0	0	0	0	0	0	0	0	0.9376	0.782	0	0	0	0	0
AC005786.5	0	0	0.9374	3.3364	0	0	0	1.0421	0.9661	0	1.3545	0	0	0	0.9967	0	0	0	1.0172	1.8008	0	0	0	0.9188	1.2706	0	0	0	0.8221	0	0	0	0	0	0	0.7767	0	0	0	0	0	0	0	0.782	0.8731	0	0	2.3012	0
AC005786.6	1.2806	0	2.8121	2.2243	1.4033	0	11.5269	3.1264	1.9323	0	0	1.0922	1.1378	0	0	0	0	0	2.0345	0	2.0915	0	0	1.8375	0	0	0	1.2756	0.8221	0	0	0	0	0	0	0	0	0.8912	0	2.359	0	0	1.8752	0.782	0	0.7983	0	3.0683	0
AC005786.7	124.217	17.4526	35.6194	28.9158	16.8401	39.75	11.5269	12.5058	4.8307	17.919	14.8992	34.9505	19.3426	6.5974	5.98	19.1068	64.6173	22.9923	11.1897	78.3328	8.366	23.858	42.15	50.5319	27.9525	91.6183	16.4371	43.3697	8.2214	19.4857	0	45.6534	9.6052	0	8.8021	9.3204	24.8322	7.1293	32.5565	0	10.7946	0	0	12.5117	7.858	0	11.5944	0	0
AC005789.9	0	2.9088	0.9374	0	0	1.2422	0	0	0	1.7919	0	0	1.1378	0	0	0	0	0	0	0	2.0915	1.7673	0	0	0	0	0	0	0.8221	0	0	0	0	0.798	0	0	0	0	0	0	0	0	0	0	0	0	0	0	0
AC005794.1	0	0	0	0	0	0	0	0	0	0	0	0	0	0	0	0	0	0	0	0	0	0	0	0	0	0	0	0	0	0	0	0	0	0	0	0	0	0	0	0	0	0	0	0	0	0	0	0	0
AC005795.1	0	2.9088	3.7494	8.8972	9.8234	6.2109	2.8817	7.295	4.8307	5.3757	4.0634	5.461	13.6536	5.278	3.9867	6.7436	2.6374	5.3649	5.0862	0.9004	4.183	9.7199	4.6833	1.8375	1.2706	2.5808	2.7395	3.8267	11.51	1.0825	3.6306	3.8044	1.921	4.7882	3.9121	7.767	0	3.5647	5.9687	3.9317	0.8995	6.2324	1.8752	6.2558	6.9849	8.7811	2.7281	3.8353	0
AC005796.2	0	0	1.8747	1.1121	0	0	0	0	0	0	0	0	0	0	0	1.1239	0	0	0	0	0	0	0	0	0	0	0	0	0	0	0	0	0	0	0	0	0	0.8912	0	0	0	0	0	0	0	0	0	0	0
AC005808.3	0	0	0	0	0	0	0	0	0	0	0	0	0	0	0.9967	0	0	0	0	0	0	0	0	0	0	0	0	0	0	0	0	0	0	0	0	0	0	0	0	0	0	0	0	0	0	0	0	0	0
AC005822.1	8.9641	61.0841	9.3735	14.4579	18.2434	27.3281	17.2903	14.5901	13.5258	0	2.7089	21.8441	15.9292	1.3195	15.9467	13.4872	23.737	10.7297	6.1035	11.7049	18.8235	9.7199	8.43	11.9439	11.4351	2.5808	5.479	10.2046	8.2214	17.3206	9.9842	10.4622	12.4867	10.3745	13.6922	8.5437	11.9195	13.3675	9.2244	4.718	8.9955	7.0114	2.8127	14.0756	6.1118	11.176	7.5023	7.6706	0
AC005838.2	0	0	0	0	1.4033	0	0	0	3.8645	0	0	0	0	0	0	0	0	0	0	0.9004	1.0457	0.8836	0	0	2.5411	0	0	0	0	0	0	0	0.9605	0.798	0	0.7767	0	2.6735	0	0	0	0	0	0	0	0	0	0	0
AC005863.1	0	0	0	0	0	0	0	0	0	0	0	0	0	0	0	0	0	0	0	0	0	0	0	0	0	0	0	0	0	0	0	0	0	0	0	0	0	0	0	0	0	0	0	0	0	0	0	0.7671	0
AC005863.2	0	0	0	0	0	0	0	0	0	0	0	0	0	0	0	0	0	0	0	0	0	0	0	0	0	0	0	0	0	0	0	0	0	0	0	0	0	0	0	0	0	0	0	0	0	0	0	0	0
AC005884.1	7.6835	0	12.1856	6.6729	4.21	3.7266	0	11.4636	3.8645	5.3757	13.5447	10.922	15.9292	5.278	5.98	6.7436	6.5936	5.3649	7.1207	3.6015	10.4575	7.9527	5.62	4.5938	5.0823	10.3232	3.6527	7.6535	0.8221	5.4127	3.6306	0	0.9605	3.1921	3.9121	6.2136	1.9866	7.1293	3.7983	4.718	2.6986	3.8952	10.3134	2.3459	6.1118	10.3777	4.0921	4.6024	5.9282
AC005915.1	0	0	0	0	0	0	0	0	0	1.7919	0	1.0922	0	0	0	1.1239	0	0	2.0345	0	0	0	0	0	0	0	0	0	1.6443	0	0	0	0	0	0	0.7767	0	0	0	0	0	0	0	0	0	0	1.364	0	0
AC005926.1	0	0	0	0	0	0	0	0	0	0	0	0	0	0	0	0	0	0	0	0	0	0	0	0	0	0	0	0	0	0	0	0	0	0	0	0	0	0	0	0	0	0	0	0	0	0	0	0	0
AC005932.1	12.8059	23.2701	3.7494	6.6729	19.6468	21.1172	11.5269	9.3793	0	16.1271	10.8357	3.2766	48.9253	29.0287	6.9767	11.2393	15.8246	21.4594	13.2242	129.654	20.915	7.069	10.3033	5.5126	3.8117	19.356	8.2186	8.929	4.9328	10.8254	9.9842	19.9733	3.8421	10.3745	7.8241	6.9903	2.9799	39.2112	8.1391	7.0771	8.9955	13.2438	7.5006	3.9099	11.3505	7.9828	2.7281	4.6024	5.9282
AC005943.6	0	17.4526	0	3.3364	2.8067	0	37.4623	0	0	0	2.7089	0	0	0	0	0	3.9562	0	0	3.6015	0	0	5.62	0	6.3528	0	0	0	0	0	2.723	1.9022	0	0	0	0	0	0	0	0	0	0	0	0	0	1.5966	0	0	0
AC005944.2	17.9283	20.3614	0	18.9065	30.8735	47.2031	5.7634	0	6.7629	37.6299	40.634	67.7166	0	31.6677	46.8434	37.0897	0	0	23.3967	0	23.0065	54.7851	0	69.826	0	28.3888	32.8743	63.7789	3.2886	31.3936	13.6148	0	22.0918	19.9509	24.4504	0	0	0	22.7896	7.8634	0	21.8133	117.197	43.7908	20.9548	0.7983	0	0	0
AC005954.3	0	0	0.9374	0	1.4033	3.7266	0	1.0421	0.9661	0	0	1.0922	0	0	0.9967	0	1.3187	3.832	1.0172	0.9004	0	3.5345	0.9367	0	0	1.2904	1.8263	0	1.6443	3.2476	0.9077	0	0.9605	0	1.956	0	0	0	0	1.5727	0	1.5581	0	1.564	0	0	0.682	0.7671	0
AC005954.4	3.8418	0	1.8747	0	4.21	0	5.7634	1.0421	0.9661	0	0	0	1.1378	0	0	2.2479	3.9562	2.2992	2.0345	0.9004	2.0915	0.8836	1.8733	6.4313	1.2706	0	2.7395	0	0	0	0	0	1.921	0	0	0	0	0	2.713	1.5727	0	0.779	0	1.564	1.7462	0.7983	0	3.8353	0
AC006000.5	0	0	0	0	1.4033	1.2422	0	1.0421	0	0	2.7089	0	0	0	0	0	0	0	0	0	0	0	0	0.9188	1.2706	5.1616	0	0	0	0	0	0	0	0	0	0	0	0.8912	1.0852	0	0	0	0	0	0	0	0	0	0
AC006003.3	0	0	0	0	0	0	0	0	0	3.5838	0	0	1.1378	0	0	0	1.3187	0	0	0	5.2287	0	0	0	0	0	0	0	0	0	0	1.9022	2.8815	0.798	0	0	0	0.8912	0	0	0	0.779	0	0	0.8731	0	1.364	3.0683	0
AC006004.1	0	0	0.9374	0	1.4033	1.2422	0	1.0421	0	5.3757	1.3545	0	0	0	0	0	0	0	0	0	0	0.8836	0	0	0	0	0	0	0	0	0	0	0	0	0	0	0	0	0	0	0	0	0.9376	0	0	0	0	0.7671	0
AC006007.1	0	0	0	0	0	0	0	0	0	0	0	0	0	0	0	0	0	0	0	0	0	0	0	0	0	0	0.9132	2.5512	0	1.0825	0	0	0	0	0	0	0	0	0	0	0	0	0	0	0.8731	0	0.682	0	0
AC006011.4	11.5253	14.5438	0	15.5701	8.42	4.9688	14.4086	12.5058	14.492	0	6.7723	6.5532	11.378	0	0	0	3.9562	1.5328	6.1035	2.7011	0	0	6.5567	0.9188	8.894	6.452	7.3054	1.2756	11.51	1.0825	2.723	1.9022	0	4.7882	5.8681	11.6505	7.9463	4.4558	17.3635	6.2907	5.3973	4.6743	6.5631	16.4216	11.3505	2.3949	3.4101	7.6706	0
AC006014.7	0	0	15.935	6.6729	0	2.4844	0	0	6.7629	0	1.3545	14.1987	0	9.2364	12.9567	6.7436	3.9562	6.1313	0	43.2181	0	3.5345	1.8733	3.6751	7.6234	3.8712	3.6527	0	1.6443	0	1.8153	0	4.8026	0	0.978	2.3301	4.9664	8.9116	4.3409	2.359	7.1964	0	2.8127	3.9099	5.2387	36.7211	3.4101	5.3694	59.2823
AC006014.8	56.3459	52.3578	27.1832	40.0373	39.2935	33.5391	72.0429	14.5901	22.221	44.7974	10.8357	32.7661	39.8229	29.0287	38.8701	37.0897	46.1552	35.2548	31.5347	31.5132	26.1437	28.2762	23.4166	33.0755	11.4351	27.0984	23.7425	25.5116	9.0435	11.9079	7.2612	9.5111	11.5262	13.5666	12.7142	22.5242	6.953	53.4698	26.5878	4.718	17.0914	10.9066	1.8752	34.4071	4.3656	24.7468	11.5944	11.5059	23.7129
AC006019.3	213.858	63.9928	25.3085	666.176	435.036	360.235	1031.65	88.5825	217.379	752.597	83.977	644.4	457.395	527.795	363.784	279.859	84.3981	135.654	44.7589	1168.69	254.117	107.803	370.92	45.9381	147.386	197.431	268.473	84.1882	138.942	248.984	106.196	106.525	214.195	170.779	307.096	35.7281	7.9463	208.532	11.9374	14.1541	347.225	88.8113	15.9388	19.5495	632.136	52.6867	23.8708	235.488	1796.25
AC006019.4	194.65	95.9893	4.6868	300.28	387.322	444.703	293.935	68.7817	221.244	657.626	138.156	609.45	434.639	373.415	423.584	188.82	125.278	86.6041	48.8279	293.523	343.006	94.5485	548.886	29.4004	194.397	287.759	336.048	119.904	235.132	277.13	225.099	266.311	288.155	325.598	523.238	59.8057	22.8457	115.851	14.1078	10.2224	679.158	116.078	22.5019	11.7297	555.302	35.9228	37.5113	357.451	154.134
AC006022.4	0	0	0	0	0	0	0	0	0	0	0	0	0	0	0	0	0	0	0	0	0	0	0	0	0	0	0	1.2756	0	0	0	0	0	0	0	0	0	0	0	0	0	0	0	0	0	0	0.682	0	0
AC006026.1	0	0	0	0	0	0	0	0	0	0	0	0	0	0	0	0	0	0	0	0	0	0	0	0	0	0	0	0	0	0	0	0	0	0	0	0	0	0	0	0	0	0	0	0	0	0	0	0	0
AC006026.10	10.2447	0	5.6241	7.785	9.8234	7.4531	8.6452	5.2107	8.6952	7.1676	6.7723	9.8298	5.689	9.2364	6.9767	5.6197	7.9123	8.4305	5.0862	7.203	7.3202	3.5345	1.8733	11.0252	3.8117	10.3232	4.5659	1.2756	3.2886	2.1651	0	0.9511	1.921	6.3843	12.7142	3.8835	0.9933	0.8912	4.3409	1.5727	0	0.779	2.8127	9.3837	0.8731	1.5966	2.0461	4.6024	0
AC006026.12	0	0	0	0	0	0	0	0	0	0	0	1.0922	0	1.3195	0	0	0	0	0	0	0	0	0	0	0	0	0	0	0	0	0	0	0	0	0	0	0	0	0	0	0	0	0	0	0	0	0	0	0
AC006026.13	0	0	0	0	0	0	0	0	0	0	0	0	0	0	0	0	0	0	0	0	0	0	0	0	0	0	0	0	0	0	0	0	0	0	0	0	0	0	0	0	0	0	0	0	0	0	0	0	0
AC006026.9	1.2806	0	1.8747	1.1121	0	3.7266	0	1.0421	0	0	4.0634	1.0922	0	0	1.9933	1.1239	0	0	3.0517	0.9004	1.0457	0.8836	0	0.9188	2.5411	0	0.9132	0	0	3.2476	1.8153	0	1.921	0.798	0	0	0	0	0.5426	0	0.8995	0.779	0.9376	0.782	0.8731	0	0	1.5341	0
AC006028.11	11.5253	8.7263	2.8121	0	0	2.4844	0	0	0.9661	3.5838	5.4179	3.2766	2.2756	1.3195	0.9967	5.6197	6.5936	1.5328	2.0345	0.9004	2.0915	5.3018	1.8733	5.5126	3.8117	6.452	2.7395	1.2756	3.2886	3.2476	1.8153	4.7556	2.8815	0.798	1.956	6.2136	5.9597	1.7823	6.5113	3.1454	4.4977	5.4533	3.7503	2.3459	1.7462	4.7897	2.0461	7.6706	0
AC006033.22	0	0	1.8747	2.2243	5.6134	0	2.8817	2.0843	0	1.7919	4.0634	3.2766	1.1378	0	4.9833	1.1239	0	3.832	3.0517	0.9004	1.0457	0.8836	0	0	0	0	0.9132	3.8267	4.1107	1.0825	0	1.9022	0	1.5961	0	3.8835	0	4.4558	3.2557	0.7863	0	0	5.6255	3.1279	3.4925	0.7983	2.7281	1.5341	0
AC006037.2	0	0	0	0	0	0	0	0	0	0	0	0	0	0	0	0	0	0	0	0	0	0	0	0	0	0	0	0	0	0	0	0	0	0	0	0	0	0	0	0	0	0	0	0	0	0	0	0	0
AC006041.1	0	0	0	0	0	0	0	0	0	0	0	0	0	0	0	0	0	0	0	0	0	0	0	0	0	0	0	0	0	0	0	1.9022	0	0	0	0	0	0	0	0	0	0	0	0.782	0	0	0	0	0
AC006042.6	10.2447	11.6351	5.6241	11.1215	2.8067	7.4531	0	5.2107	9.6613	8.9595	9.4813	9.8298	2.2756	7.9169	2.99	7.8675	6.5936	4.5985	8.138	5.4023	5.2287	3.5345	7.4933	2.7563	11.4351	18.0656	2.7395	5.1023	1.6443	3.2476	7.2612	6.6578	0	9.5764	0.978	1.5534	0.9933	1.7823	2.1704	5.5044	3.5982	4.6743	1.8752	2.3459	6.1118	0.7983	2.0461	4.6024	0
AC006042.7	0	11.6351	1.8747	1.1121	8.42	3.7266	0	5.2107	2.8984	1.7919	1.3545	9.8298	4.5512	1.3195	5.98	1.1239	0	10.7297	2.0345	0.9004	2.0915	7.069	4.6833	4.5938	3.8117	7.7424	1.8263	3.8267	3.2886	2.1651	3.6306	4.7556	3.8421	1.5961	1.956	1.5534	1.9866	3.5647	2.1704	0.7863	0	0	0.9376	0.782	1.7462	1.5966	4.0921	1.5341	0
AC006042.8	17.9283	2.9088	17.8097	14.4579	21.0501	19.875	11.5269	30.2223	25.1194	30.4623	28.4438	52.4258	12.5158	15.8339	27.9067	15.735	14.5059	21.4594	32.552	9.0038	28.2352	34.4616	17.7966	34.913	19.0585	46.4544	23.7425	71.4324	16.4428	21.6508	19.0608	35.1911	44.1837	36.7096	18.5823	20.1941	15.8926	18.7144	10.8522	15.7268	15.2923	14.8019	10.3134	16.4216	13.9699	11.9743	27.963	56.7627	11.8565
AC006050.2	0	0	0.9374	0	0	2.4844	0	0	0	0	0	0	0	0	0	0	1.3187	0	0	0	0	1.7673	0	0	0	1.2904	0	0	0	0	0	0	0	0	0	0	0	2.6735	0	0	0.8995	0	0	0	0	0	0	0	0
AC006070.12	0	0	0	0	0	0	0	0	0	0	0	0	0	0	0.9967	0	0	0	0	0	0	0	0	0	0	0	0	0	0	0	0	0	0	0	0	0	0	0	0	0	0	0	0	0	0	0	0	0	0
AC006076.1	0	0	0	0	0	0	0	0	0	0	0	0	0	0	0	0	0	0	0	0	0	0	0	0	0	0	0	0	0	0	0	0	0	0	0	0	0	0	0	0	0	0	0	0	0	0	0	0	0
AC006077.3	12.8059	40.7227	40.3061	41.1494	29.4701	26.0859	69.1612	17.7165	21.2549	39.4218	10.8357	30.5817	30.7206	36.9457	25.9134	33.7179	13.1872	54.415	33.5692	40.517	12.549	13.2545	21.5433	20.2128	13.9762	16.7752	16.4371	15.3069	8.2214	9.7428	5.4459	21.8756	10.5657	11.9705	12.7142	14.7572	9.9329	46.3405	17.3635	15.7268	16.1918	9.3486	5.6255	9.3837	18.3354	31.9314	13.6405	12.273	266.77
AC006077.4	0	0	0	0	1.4033	3.7266	0	1.0421	1.9323	3.5838	0	2.1844	1.1378	0	0.9967	0	2.6374	0	2.0345	0	1.0457	0.8836	0	0.9188	1.2706	2.5808	0.9132	0	0	1.0825	0	0	0	0.798	0.978	0	0	0	1.0852	0	0	0	1.8752	0	0	0	0	0	0
AC006115.1	0	0	0	0	0	0	0	0	0	0	0	0	0	0	0	0	0	0	0	0	0	0	0	0	0	0	0	0	0	0	0	0	0	0	0	0	0	0	0	0	0	0	0	0	0	0	0	0	0
AC006115.6	0	0	0	0	0	2.4844	0	0	0	0	0	0	0	0	0	0	0	0	0	0	0	0	0	0	0	0	0	0	0	0	0	0	0	0	0	0	0	0	0	0	0	0	0	0	0	0	0	0	0
AC006116.1	0	0	0	0	0	0	0	0	0	0	0	0	0	0	0	0	0	0	0	0	0	0	0	0	0	0	0	0	0	0	0	0	0	0	0	0	0	0	0	0	0	0	0	0	0	0	0	0	0
AC006116.12	0	0	0	1.1121	5.6134	3.7266	0	0	0.9661	1.7919	0	1.0922	4.5512	0	0	1.1239	2.6374	0	0	0	1.0457	0	0	0	1.2706	5.1616	0.9132	3.8267	0.8221	1.0825	0.9077	1.9022	0	0	0	1.5534	0	0	0	0	0	0	0	0	0	0	0	0.7671	0
AC006116.13	5.1224	14.5438	0.9374	1.1121	2.8067	3.7266	2.8817	1.0421	0.9661	1.7919	1.3545	2.1844	3.4134	3.9585	2.99	5.6197	1.3187	3.0656	6.1035	1.8008	4.183	0.8836	0.9367	1.8375	0	3.8712	1.8263	2.5512	0.8221	1.0825	0.9077	1.9022	2.8815	3.1921	1.956	0.7767	1.9866	1.7823	2.713	0.7863	2.6986	0.779	0.9376	0	2.6193	4.7897	1.364	0.7671	5.9282
AC006116.14	0	0	0	1.1121	1.4033	0	0	0	0.9661	1.7919	0	0	0	1.3195	0	0	1.3187	2.2992	1.0172	0	0	0	0.9367	2.7563	0	0	1.8263	0	0	1.0825	1.8153	0	0	0	0	0	1.9866	0.8912	0	0.7863	0	0	0	0	0	0.7983	0	0	0
AC006116.15	5.1224	17.4526	0.9374	1.1121	2.8067	7.4531	0	1.0421	4.8307	3.5838	1.3545	5.461	3.4134	3.9585	3.9867	2.2479	3.9562	8.4305	6.1035	2.7011	2.0915	4.4182	6.5567	4.5938	3.8117	0	4.5659	1.2756	1.6443	5.4127	5.4459	3.8044	3.8421	0.798	2.934	1.5534	0.9933	0.8912	2.1704	3.1454	0	4.6743	2.8127	3.1279	1.7462	1.5966	3.4101	2.3012	0
AC006116.17	2.5612	2.9088	6.5615	8.8972	16.8401	16.1484	14.4086	10.4215	11.5936	17.919	10.8357	29.4895	11.378	14.5144	27.9067	16.859	22.4182	19.1602	13.2242	8.1034	9.4117	12.3708	12.1767	16.5377	13.9762	23.2272	10.0449	12.7558	13.1542	19.4857	11.7995	22.8267	7.6841	10.3745	6.8461	23.3009	13.9061	2.6735	15.7357	12.5815	8.0959	19.4762	7.5006	3.1279	8.7312	3.9914	15.0045	3.8353	17.7847
AC006116.19	10.2447	5.8175	5.6241	6.6729	14.0334	31.0547	2.8817	22.9272	10.6274	14.3352	8.1268	22.9363	15.9292	19.7923	9.9667	11.2393	19.7808	3.0656	5.0862	0.9004	8.366	8.8363	3.7467	19.294	11.4351	23.2272	5.479	19.1337	2.4664	6.4952	9.0766	12.3645	16.3288	7.9803	4.8901	10.8738	3.9732	6.2381	3.7983	5.5044	7.1964	12.4647	12.1885	7.8198	11.3505	0.7983	4.0921	11.5059	0
AC006116.20	32.0147	151.256	38.4314	36.7008	47.7136	86.9532	34.5806	73.9924	22.221	59.1326	29.7983	78.6387	46.6497	73.8913	47.8401	55.0726	42.199	39.0868	42.7244	29.7124	30.3267	49.4833	33.72	60.6383	40.6582	64.5199	20.0898	39.5429	23.0199	32.4761	17.2455	27.5822	28.8155	27.9312	25.4284	36.5048	17.8792	21.3879	20.6191	15.7268	19.79	28.0457	10.3134	21.8954	17.4623	7.9828	17.0506	14.5742	0
AC006116.21	2.5612	0	1.8747	0	1.4033	2.4844	0	0	0	5.3757	1.3545	0	1.1378	1.3195	1.9933	2.2479	0	0.7664	2.0345	0	1.0457	3.5345	0.9367	1.8375	0	3.8712	1.8263	3.8267	1.6443	1.0825	1.8153	0.9511	0.9605	1.5961	0.978	0	0	0	1.6278	1.5727	0	3.1162	0	0	0.8731	0.7983	3.4101	0	0
AC006116.22	10.2447	34.9052	7.4988	1.1121	9.8234	7.4531	11.5269	5.2107	8.6952	3.5838	4.0634	9.8298	2.2756	2.639	3.9867	8.9914	7.9123	6.8977	2.0345	0.9004	6.2745	2.6509	9.3667	2.7563	2.5411	2.5808	3.6527	2.5512	2.4664	5.4127	5.4459	4.7556	4.8026	5.5862	3.9121	1.5534	3.9732	1.7823	1.6278	4.718	5.3973	7.0114	3.7503	3.1279	5.2387	8.7811	3.4101	2.3012	0
AC006116.24	0	8.7263	0	1.1121	8.42	0	0	4.1686	1.9323	3.5838	0	12.0142	7.9646	6.5974	0	2.2479	5.2749	1.5328	4.069	0	2.0915	4.4182	5.62	15.619	3.8117	7.7424	8.2186	2.5512	5.755	1.0825	5.4459	7.6089	3.8421	1.5961	4.8901	0	3.9732	0	7.0539	7.0771	0	3.1162	0	0	1.7462	0	9.5483	3.0683	0
AC006116.27	5.1224	11.6351	15.935	23.3551	16.8401	12.4219	5.7634	10.4215	13.5258	3.5838	0	2.1844	37.5473	7.9169	13.9534	4.4957	14.5059	24.5251	1.0172	17.1072	1.0457	3.5345	8.43	30.3192	3.8117	23.2272	12.7844	6.3779	12.3321	5.4127	12.7072	18.0711	23.0524	22.345	14.6702	16.3106	9.9329	4.4558	21.1617	18.0859	22.4887	13.2438	15.0013	10.1657	8.7312	2.3949	6.8202	3.8353	5.9282
AC006126.3	6.4029	2.9088	1.8747	5.5607	1.4033	11.1797	5.7634	2.0843	2.8984	3.5838	9.4813	2.1844	2.2756	0	0.9967	2.2479	1.3187	2.2992	4.069	3.6015	2.0915	3.5345	0.9367	9.1876	0	2.5808	0	2.5512	0	4.3302	3.6306	0.9511	0.9605	2.3941	3.9121	0	1.9866	0.8912	1.6278	0	9.895	1.5581	0	0.782	0.8731	0	0	0	5.9282
AC006128.2	293.255	282.15	212.779	316.962	369.079	207.445	510.064	236.567	268.584	320.75	109.712	273.051	306.068	385.291	279.067	260.752	216.27	410.795	191.243	461.893	174.64	210.304	293.176	219.584	302.395	205.173	191.767	190.061	157.851	185.114	169.732	257.751	376.522	90.976	111.494	160	217.53	427.759	242.546	198.944	175.412	98.9389	25.3146	293.242	151.922	403.932	143.225	171.822	533.541
AC006129.1	14.0865	0	2.8121	2.2243	0	3.7266	0	5.2107	6.7629	1.7919	5.4179	4.3688	4.5512	2.639	2.99	1.1239	0	1.5328	8.138	2.7011	6.2745	5.3018	0.9367	4.5938	0	6.452	1.8263	1.2756	1.6443	3.2476	1.8153	0	0	0.798	6.8461	5.4369	0.9933	0	4.8835	0	0.8995	0.779	0	0	1.7462	8.7811	3.4101	1.5341	0
AC006129.2	12.8059	5.8175	6.5615	8.8972	12.6301	4.9688	0	10.4215	4.8307	14.3352	8.1268	13.1064	6.8268	9.2364	8.97	1.1239	1.3187	3.832	20.345	10.8045	10.4575	13.2545	7.4933	9.1876	1.2706	0	10.0449	3.8267	12.3321	12.9905	12.7072	7.6089	10.5657	8.7784	1.956	13.2038	4.9664	2.6735	7.5965	3.1454	3.5982	7.0114	3.7503	0.782	1.7462	7.1846	8.8663	3.0683	0
AC006129.3	19.2088	2.9088	11.2482	8.8972	7.0167	3.7266	0	0	7.729	44.7974	2.7089	18.5675	7.9646	3.9585	9.9667	2.2479	15.8246	0.7664	20.345	5.4023	12.549	15.0217	8.43	9.1876	6.3528	2.5808	4.5659	0	7.3993	0	5.4459	2.8533	7.6841	7.1823	14.6702	4.6602	6.953	0.8912	3.2557	0	3.5982	2.3371	0.9376	0	1.7462	4.7897	3.4101	0	11.8565
AC006130.1	0	0	0	0	0	0	0	0	0	0	0	0	0	0	0	0	0	0	0	0	0	0	0	0	0	0	0	0	0	0	0	0	0	0	0	0	0	0	0	0	0	0	0	0	0	0	0	0	0
AC006130.3	3.8418	5.8175	0	1.1121	0	0	0	0	0	3.5838	0	2.1844	2.2756	0	0.9967	0	0	0	1.0172	0	3.1372	0.8836	4.6833	2.7563	0	0	0	0	0.8221	0	0	4.7556	0	0	0	0	1.9866	0	1.0852	0	0	0	0	0	0	0	0	0	0
AC006130.4	0	0	0	0	0	0	0	0	0	0	0	1.0922	0	0	0	0	0	0	0	0	0	0	0	0	0	1.2904	0	0	0	0	0	0.9511	0	0	0	0	0	0	0	0	0	0	0	0	0	0	0.682	0	0
AC006133.3	0	0	0	0	0	0	0	0	0	0	0	0	0	0	0	0	0	0	0	0	0	0	0	0	0	0	0	0	0	0	0	0	0	0	0	0	0	0	0	0	0	0	0	0	0	0	0	0	0
AC006133.7	0	0	0	0	0	0	0	0	0	0	0	0	0	0	0	0	0	0	0	0	0	0	0	0	0	0	0	0	0	0	0	0	0	0	0	0	0	0	0	0	0	0	0	0	0	0	0	0	0
AC006145.1	0	0	0	0	0	0	0	0	0	0	0	0	0	0	0	0	0	0	0	0	0	0	0	0	0	0	0	0	0	0	0	0	0	0	0	0	0	0	0	0	0	0	0	0	0	0	0	0	0
AC006145.4	28.173	29.0877	6.5615	14.4579	26.6635	22.3594	2.8817	21.8851	17.3903	21.5028	32.5072	13.1064	23.8938	14.5144	11.96	15.735	36.9242	13.0289	10.1725	14.406	21.9607	18.5562	23.4166	34.913	10.1645	52.9063	16.4371	31.8895	16.4428	22.7333	14.5225	18.0711	48.0258	13.5666	16.6262	15.5339	12.9128	9.8028	7.5965	14.1541	35.9819	29.6038	2.8127	6.2558	15.7161	6.3863	9.5483	1.5341	0
AC006150.1	0	0	0	0	0	0	0	0	0	0	1.3545	0	0	0	0	0	0	0	0	0	0	0	0	0	0	0	0	0	0	0	0	0	0	0	0	0	0	0	0	0	0	0	0	0	0	0	0	0	0
AC006150.2	0	0	0	0	0	0	0	0	0	0	0	0	0	0	0	0	0	0	0	0	0	0	0	0	0	0	0	0	0	0	0	0	0	0	0	0	0	0	0	0	0	0	0	0	0	0	0	0	0
AC006153.3	1.2806	0	0	0	1.4033	0	0	2.0843	0	0	0	1.0922	0	1.3195	0.9967	0	0	1.5328	1.0172	0	0	0	0	0	0	0	0	2.5512	0	0	0	0	0	0	2.934	0	0	0	0	0	0	0.779	0.9376	0.782	0	1.5966	0	0	0
AC006156.2	0	0	0	0	0	0	0	0	0	0	0	0	0	0	0	0	0	0	0	0	0	0	0	0	0	0	0	0	0	0	0	0	0	0	0	0	0	0	0	0	0	0	0	0	0	0	0	0	0
AC006159.4	0	0	0.9374	0	0	0	0	0	0	0	0	0	0	2.639	0	1.1239	0	0	0	0	0	0	0	0.9188	0	0	0	6.3779	0	2.1651	2.723	0	0	0	0	0	0	2.6735	4.3409	0	0.8995	0	3.7503	0.782	0	0	0	0	0
AC006159.5	8.9641	0	0.9374	2.2243	5.6134	2.4844	0	4.1686	5.7968	10.7514	16.2536	3.2766	2.2756	3.9585	3.9867	0	0	0	1.0172	1.8008	0	0.8836	3.7467	8.2689	1.2706	1.2904	3.6527	2.5512	0	0	0.9077	0	0	0.798	0	3.1068	0.9933	0	0	0	0.8995	0	0	0	2.6193	3.9914	0	0	0
AC006160.5	112.692	52.3578	35.6194	38.9251	63.1503	60.8672	23.0537	41.6859	37.6791	94.9706	56.8877	64.44	29.5828	30.3482	40.8634	44.9572	47.4739	30.6563	53.9142	14.406	30.3267	37.9961	37.4666	40.4256	33.0348	52.9063	29.2216	19.1337	44.3956	12.9905	25.4144	35.1911	18.2498	20.7489	25.4284	38.0582	15.8926	27.6261	33.0991	16.5132	13.4932	28.0457	25.3146	18.7675	19.2086	16.764	12.9585	19.1766	17.7847
AC006195.2	11.5253	8.7263	6.5615	6.6729	2.8067	3.7266	5.7634	12.5058	4.8307	1.7919	8.1268	3.2766	9.1024	5.278	3.9867	4.4957	7.9123	9.1969	8.138	19.8083	3.1372	2.6509	9.3667	5.5126	1.2706	5.1616	9.1317	5.1023	2.4664	3.2476	3.6306	3.8044	10.5657	1.5961	1.956	7.767	7.9463	8.0205	7.0539	6.2907	13.4932	0.779	0	4.6919	2.6193	8.7811	2.7281	1.5341	0
AC006196.1	0	0	0	0	0	0	0	0	0	1.7919	0	0	0	1.3195	0	0	0	0	0	0	0	0	0	0	0	0	0	0	0	0	0	0	0	0	0	0	0	0	0	0	0	0	0	0	0	2.3949	0	0	0
AC006227.1	1.2806	0	0	0	0	0	0	0	0	0	0	0	0	1.3195	0	1.1239	0	0.7664	1.0172	0	0	1.7673	0	0	1.2706	2.5808	0	0	0	0	1.8153	0	0	0	0	0	0	0	1.6278	33.0263	0.8995	0	0	3.1279	0	0	2.0461	0	0
AC006262.10	0	0	0	0	0	0	0	0	0	0	0	0	0	0	0	0	0	0	0	0	0	0	0	0	0	0	0	0	0	0	0	0	0	0	0	0	0	0	0	0	0	0	0	0	0	0	0	0	0
AC006262.4	2.5612	0	0	0	0	0	0	0	0.9661	0	0	0	0	1.3195	0	1.1239	0	0	0	0	0	0	1.8733	0	0	0	0	0	0	0	0	0	0	0	0	0	0	0	0.5426	0	0	0	0.9376	0	0	0	0	0	0
AC006262.5	1.2806	0	0	1.1121	2.8067	1.2422	0	0	2.8984	102.138	0	0	0	0	0	1.1239	0	1.5328	0	153.964	1.0457	0.8836	0.9367	0	8.894	0	0	1.2756	0.8221	0	0	13.3156	226.682	0.798	8.8021	6.9903	0	1.7823	1.0852	0	0	187.75	0	0	0	9.5794	0	0	0
AC006272.1	0	0	1.8747	0	0	0	0	0	0	0	0	0	0	0	0.9967	0	0	0	0	1.8008	0	0	0.9367	0	0	0	0	1.2756	0.8221	0	0	0	0	0	0	0	0	0	0	0	0	0	0	0.782	0	0	0	0	0
AC006272.2	3.8418	0	1.8747	1.1121	2.8067	0	0	2.0843	0.9661	3.5838	2.7089	3.2766	1.1378	3.9585	2.99	0	5.2749	0	3.0517	0.9004	1.0457	1.7673	0	0	2.5411	5.1616	2.7395	5.1023	3.2886	1.0825	0.9077	1.9022	1.921	1.5961	4.8901	0.7767	0	0	1.0852	1.5727	0	3.8952	0.9376	0.782	0.8731	4.7897	2.0461	0	0
AC006273.4	0	8.7263	8.4362	3.3364	1.4033	2.4844	8.6452	1.0421	0.9661	1.7919	4.0634	3.2766	2.2756	9.2364	4.9833	6.7436	2.6374	13.7954	4.069	18.0075	6.2745	0	1.8733	0	2.5411	1.2904	3.6527	0	3.2886	3.2476	1.8153	3.8044	4.8026	0	1.956	0	3.9732	0.8912	0.5426	7.8634	1.7991	0	1.8752	0	2.6193	3.9914	4.0921	1.5341	17.7847
AC006273.5	8.9641	11.6351	39.3688	6.6729	5.6134	3.7266	20.172	3.1264	5.7968	3.5838	6.7723	5.461	5.689	17.1533	28.9034	37.0897	14.5059	36.0212	16.276	53.1222	9.4117	15.0217	12.1767	28.4816	20.3291	27.0984	16.4371	15.3069	6.5771	37.8888	8.1689	37.0934	17.2893	6.3843	6.8461	4.6602	43.7048	1.7823	16.2783	52.6849	7.1964	6.2324	7.5006	10.9477	8.7312	23.1502	42.2855	29.9155	47.4258
AC006277.2	17.9283	8.7263	7.4988	14.4579	12.6301	18.6328	11.5269	7.295	13.5258	3.5838	9.4813	15.2909	10.2402	10.5559	3.9867	8.9914	3.9562	4.5985	4.069	9.0038	3.1372	5.3018	2.81	5.5126	7.6234	14.1944	2.7395	11.4802	13.1542	4.3302	4.5383	5.7067	5.7631	1.5961	2.934	6.2136	3.9732	6.2381	2.713	3.9317	4.4977	0.779	3.7503	4.6919	2.6193	5.588	7.5023	3.8353	0
AC006277.3	23.0506	29.0877	20.6217	22.2429	21.0501	60.8672	14.4086	34.3909	27.0516	48.3812	23.026	32.7661	18.2048	10.5559	33.8867	29.2222	46.1552	22.2258	34.5865	20.7087	23.0065	17.6726	18.7333	36.7505	30.4936	37.4216	14.6108	30.6139	25.4864	24.8984	17.2455	31.3867	39.3811	11.9705	10.7582	41.1649	24.8322	17.8233	19.5339	24.3766	10.7946	13.2438	8.4382	14.0756	13.9699	16.764	23.1888	25.3131	5.9282
AC006296.1	0	0	0	0	0	0	0	0	0	0	0	0	0	0	0	0	0	0	0	0	0	0	0	0	0	0	0	0	0	0	0	0	0	0	0	0	0	0	0	0	0	0	0	0	0	0	0	0	0
AC006296.2	0	0	0	0	0	0	0	0	0	0	0	0	0	0	0	0	0	0	0	0	0	0	0	0	0	0	0	0	0	0	0	0	0	0	0	0	0	0	0	0	0	0	0	0	0	0	0	0	0
AC006322.1	0	0	0	0	0	0	0	0	0	0	0	0	0	0	0	0	0	0	0	0	0	0	0	0	0	0	0	0	0	0	0	0	0	0	0	0	0	0	0	0	0	0	0	0	0	0	0	0	0
AC006326.3	0	0	0	0	0	0	0	0	0	0	0	0	0	0	0	0	0	0	0	0	0	0	0	0	0	0	0	0	0	0	0	0	0	0	0	0	0	0	0	0.7863	0	0	0	0	0	0	0	0	0
AC006326.5	0	0	0	0	0	0	0	0	0	0	0	0	0	0	0	0	0	0	0	0	0	0	0	0	0	0	0	0	0	0	0	0	0	0	0	0	0	0	0	0	0	0	0	0	0	0	0	0	0
AC006328.1	0	0	0	0	0	0	0	0	0	0	0	0	0	0	0	0	0	0	0	0	0	0	0	0	0	0	0	0	0	0	0	0	0	0	0	0	0	0	0	0	0	0	0	0	0	0	0	0	0
AC006328.9	0	0	0	0	0	0	0	0	0	0	0	0	0	0	0	0	0	0	0	0	0	0	0	0	0	0	0	0	0	0	0	0	0	0	0.978	0	0	0	0	0	0	0	0	0	0	0	0	0	0
AC006335.10	0	0	0	0	0	0	0	0	0	0	0	0	0	0	0	0	0	0	0	0	0	0	0	0	0	0	0	0	0	0	0	0	0	0	0	0	0	0	0	0	0	0	0	0	0	0	0	0	0
AC006335.2	0	0	0	0	0	0	0	0	0	0	0	0	0	0	0	0	0	0	0	0	0	0	0	0	0	0	0	0	0	0	0	0	0	0	0	0	0	0	0	0	0	0	0	0	0	0	0	0	0
AC006335.6	0	0	0	0	0	0	0	0	0	0	0	0	0	0	0	0	0	0	0	0	0	0	0	0	0	0	0	0	0	0	0	0	0	0	0	0	0	0	0	0	0	0	0	0	0	0	0	0	0
AC006355.3	24.3312	14.5438	14.9976	6.6729	9.8234	43.4766	0	21.8851	13.5258	1.7919	48.7609	28.3973	26.1694	13.1949	22.9234	24.7265	32.968	26.8243	13.2242	32.4136	25.098	7.069	8.43	22.0503	6.3528	70.9719	15.524	25.5116	5.755	7.5778	7.2612	12.3645	17.2893	3.9902	7.8241	8.5437	8.9396	10.694	13.0226	6.2907	1.7991	7.7905	5.6255	13.2936	16.5892	5.588	5.4562	9.2048	5.9282
AC006366.3	0	0	0	0	0	0	0	0	0	0	0	0	0	0	0	0	0	8.4305	6.1035	0	0	0	0	0	0	0	4.5659	0	0	0	0	0	0	0	0	0	0	0	0	0	0	0	0	0	0	0	0	0	0
AC006369.2	0	5.8175	3.7494	0	5.6134	0	0	1.0421	0	0	0	1.0922	0	0	0.9967	0	2.6374	0.7664	0	1.8008	3.1372	0	0	1.8375	0	0	0	0	0.8221	1.0825	0.9077	0.9511	2.8815	0.798	0	0	0	0	1.0852	0	0	0	0	0	0	2.3949	1.364	0	0
AC006369.3	0	0	0	0	0	0	0	0	0	0	0	0	0	0	0	0	0	0	0	0	0	0	0	0	0	0	0	0	0	0	0	0	0	0	0	0	0	0	0	0	0	0	0	0	0	0	0	0	0
AC006371.1	0	0	0	0	0	0	0	0	0	0	0	0	0	0	0	0	0	0	0	0	0	0	0	0	0	0	0	0	0	0	0	0	0	0	0	0	0	0	0	0	0	0	0	0	0	0	0	0	0
AC006372.4	0	0	0.9374	2.2243	1.4033	2.4844	0	5.2107	1.9323	1.7919	1.3545	2.1844	0	5.278	3.9867	1.1239	0	2.2992	0	2.7011	2.0915	0.8836	3.7467	2.7563	0	2.5808	0	2.5512	0.8221	0	0	0	5.7631	2.3941	1.956	3.8835	3.9732	0	1.0852	1.5727	5.3973	1.5581	1.8752	0.782	0.8731	3.1931	4.7742	24.546	0
AC006372.5	0	0	0	0	1.4033	1.2422	0	0	0	0	0	0	0	0	0	1.1239	0	0	0	0	0	0.8836	0	0	0	0	0	0	0	0	0	0	0	0	0	0	0	0	0	0	0	0	0	0	0	0	0	0.7671	0
AC006372.6	0	2.9088	1.8747	1.1121	0	0	0	1.0421	3.8645	1.7919	0	2.1844	3.4134	0	0.9967	1.1239	0	0.7664	1.0172	2.7011	0	0	1.8733	0.9188	0	2.5808	0	1.2756	0	1.0825	0.9077	0	0	0	0.978	0	0	0	2.1704	0.7863	1.7991	0	0	0.782	0.8731	0	0.682	18.4095	0
AC006373.1	0	0	0	0	0	0	0	0	0	0	0	0	0	0	0	0	0	0	0	0	0	0	0	0	0	0	0	0	0	0	0	0	0	0	0	0	0	0	0	0	0	0	0	0.782	0	0	0	0	0
AC006377.1	0	0	0	0	0	0	0	0	0	0	0	0	0	0	0	0	0	0	0	0	0	0	0	0	0	0	0	0	0	0	0	0	0	0	0	0	0	0	0	0	0	0	0	0	0	0	0	0	0
AC006378.2	10.2447	11.6351	3.7494	0	1.4033	2.4844	8.6452	1.0421	0.9661	5.3757	4.0634	3.2766	7.9646	5.278	6.9767	2.2479	2.6374	2.2992	8.138	1.8008	1.0457	3.5345	1.8733	4.5938	8.894	3.8712	0.9132	3.8267	0	0	2.723	0.9511	0.9605	2.3941	0	1.5534	0	0	3.2557	1.5727	0	0.779	1.8752	3.1279	0	0	1.364	0	0
AC006380.1	0	0	0	0	0	0	0	0	0	0	0	0	0	0	0	0	0	0	0	0	0	0	0	0	0	0	0	0	0	0	0	0	0	0	0	0	0	0	0	0	0	0	0	0	0	0	0	0	0
AC006380.3	0	0	0	0	0	0	0	0	0	0	0	0	0	0	0	0	0	0	0	0	0	0	0	0	0	0	0	0	0	0	1.8153	0	0	0	0	0	0	0	0	0	0	0	0	0.782	0	0	0	0	0
AC006386.1	0	0	0	0	0	0	0	0	0	0	0	0	0	0	0	0	0	0	0	0	0	0	0	0	0	0	0	0	0	0	0	0	0	0	0	0	0	0	0	0	0	0	0	0	0	0	0	0	0
AC006390.4	0	0	0	0	0	0	0	0	0	0	0	0	0	0	0	0	0	0	0	0	0	0	0	0	0	0	0	0	0	1.0825	0	0	0	0	0	0	0	0	0	0	0	0	0	0	0	0	0	0	0
AC006427.2	5.1224	0	1.8747	0	2.8067	6.2109	28.8172	3.1264	3.8645	8.9595	1.3545	5.461	9.1024	11.8754	10.9634	10.1154	1.3187	3.832	3.0517	6.3026	1.0457	15.9054	1.8733	2.7563	0	14.1944	10.0449	10.2046	3.2886	6.4952	4.5383	7.6089	0	3.1921	0	0	4.9664	0	7.5965	2.359	0.8995	1.5581	4.6879	2.3459	7.858	3.1931	6.8202	10.7389	0
AC006445.6	0	2.9088	0	0	0	0	0	0	0	0	0	0	0	0	0	0	0	0	0	0	0	0.8836	0	0	0	0	0	0	0	0	0	0	0	0	0	0	0	0	0	0	0	0	0.9376	0	0	0	0	0	0
AC006445.7	0	8.7263	0.9374	0	0	0	0	0	0.9661	3.5838	0	1.0922	1.1378	2.639	0.9967	0	1.3187	0.7664	0	0	0	6.1854	0.9367	0.9188	2.5411	1.2904	0.9132	2.5512	0	1.0825	0.9077	2.8533	0	0.798	0	2.3301	2.9799	2.6735	0	0.7863	4.4977	1.5581	0.9376	0	0.8731	0	0.682	0	0
AC006449.2	90.9219	87.263	17.8097	12.2336	22.4534	49.6875	8.6452	18.7586	24.1533	35.838	35.2162	34.9505	42.0985	32.9872	38.8701	26.9743	56.705	18.3938	41.7072	0	35.5555	44.1815	24.3533	46.8569	47.011	54.1967	21.9162	34.4406	13.1542	28.146	40.8445	40.8978	11.5262	22.345	23.4723	18.6407	18.8725	9.8028	15.7357	11.0088	12.5937	21.8133	25.3146	22.6774	14.843	0	16.3686	8.4377	0
AC006452.1	0	0	0	0	0	0	0	0	0	0	0	0	0	0	0	0	0	0	0	0	0	0	0	0	0	0	0	0	0	0	0	0	0	0	0	0	0	0	0	0	0	0	0	0	0	0	0	0	0
AC006458.3	0	0	0	0	0	2.4844	0	1.0421	0	0	9.4813	0	2.2756	2.639	1.9933	1.1239	3.9562	2.2992	3.0517	0.9004	3.1372	0	0	2.7563	1.2706	1.2904	2.7395	1.2756	5.755	2.1651	2.723	3.8044	0.9605	0	0	0.7767	0	0	0.5426	0.7863	5.3973	0	4.6879	2.3459	0.8731	0	0	9.2048	0
AC006460.2	29.4536	11.6351	1.8747	16.6822	15.4367	67.0782	0	14.5901	17.3903	14.3352	54.1787	12.0142	19.3426	13.1949	0.9967	12.3632	17.1434	6.1313	8.138	94.5396	7.3202	14.1381	8.43	8.2689	17.7879	51.6159	16.4371	16.5825	4.9328	9.7428	18.1531	8.56	3.8421	20.7489	5.8681	10.8738	13.9061	5.347	8.6817	8.6498	8.0959	9.3486	59.0675	3.1279	2.6193	3.1931	4.7742	12.273	0
AC006461.2	15.3671	14.5438	8.4362	7.785	15.4367	26.0859	5.7634	13.5479	2.8984	14.3352	12.1902	16.3831	18.2048	2.639	8.97	10.1154	19.7808	5.3649	8.138	5.4023	15.6862	7.069	2.81	5.5126	13.9762	16.7752	9.1317	15.3069	2.4664	9.7428	3.6306	13.3156	13.4472	4.7882	6.8461	9.3204	4.9664	9.8028	3.2557	5.5044	2.6986	14.8019	10.3134	7.0378	8.7312	4.7897	2.7281	3.0683	0
AC006466.5	0	0	0	0	0	0	0	0	0	0	0	0	0	0	0	0	0	0	0	0	0	0	0	0	0	0	0	0	0	0	0	0	0	0	0	0	0	0	0	0	0	0	0	0	0	0	0	0	0
AC006480.1	0	0	0	0	0	0	0	0	0	0	0	0	0	0	0	0	0	0	0	0	0	0	0	0	0	0	0	0	0	0	0	0	0	0	0	0	0	0	0	0	0	0	0	0	0	0	0	0	0
AC006482.1	0	0	0	0	0	0	0	0	0	0	0	0	0	0	0	0	0	0	0	0	0	0	0	0	0	0	0	0	0	0	0	0	0	0	0	0	0	0	0	0	0	0	0	0	0	0	0	0	0
AC006483.1	5.1224	0	2.8121	8.8972	11.2267	0	2.8817	8.3372	6.7629	23.2947	31.1528	13.1064	10.2402	6.5974	5.98	19.1068	2.6374	6.1313	5.0862	6.3026	7.3202	2.6509	1.8733	11.0252	0	0	2.7395	0	4.9328	1.0825	0	0	1.921	11.1725	2.934	0	0	0	7.5965	0	1.7991	4.6743	6.5631	0	1.7462	4.7897	3.4101	1.5341	0
AC006483.5	0	0	0.9374	0	0	1.2422	0	0	1.9323	0	0	0	0	0	0	0	1.3187	0	0	0	0	0.8836	0	0.9188	0	0	0	0	0.8221	0	0.9077	0.9511	0	0	0	0	0	0	0	0	0	0	0	0	0.8731	0	0	0	0
AC006486.10	11.5253	17.4526	7.4988	14.4579	7.0167	12.4219	17.2903	19.8008	12.5597	14.3352	17.6081	12.0142	6.8268	1.3195	12.9567	6.7436	15.8246	5.3649	6.1035	18.9079	2.0915	13.2545	11.24	18.3753	11.4351	14.1944	10.0449	14.0314	7.3993	3.2476	14.5225	0.9511	3.8421	7.9803	7.8241	8.5437	7.9463	11.5851	8.1391	8.6498	7.1964	8.5695	0.9376	2.3459	1.7462	8.7811	9.5483	8.4377	35.5694
AC006486.9	0	0	0	0	0	0	0	0	0	0	0	0	0	0	0	0	0	0	0	2.7011	0	0	0	0	0	0	0	0	0	0	0	0	0	0	0	0	0	0	0	0	0	0	0	0	0	0	0	0	35.5694
AC006487.1	0	0	0	0	0	0	0	0	0	0	0	0	0	0	0	0	0	0	0	0	0	0	0	0	0	0	0	0	0	0	0	0	0	0	0	0	0	0	0	0	0	0	0	0	0	0	0	0	0
AC006499.1	1.2806	0	0	0	1.4033	0	0	0	0.9661	0	1.3545	3.2766	0	0	0	0	0	0	0	0	0	0	0	0.9188	0	0	0.9132	0	0	0	1.8153	0.9511	0	0	0	0	0	0	0	0	0	0.779	0	0	0	0	0	0.7671	0
AC006499.2	0	0	0	0	0	0	0	0	0.9661	0	0	0	0	0	0	0	0	0	0	0	0	0	0	0	0	0	0	0	0	0	0.9077	0	0	0	0	0	0	0	0	0	0	0	0.9376	0	0	0	0	0	0
AC006499.3	0	0	0	0	0	0	0	2.0843	0	1.7919	0	0	0	0	0	0	0	0	1.0172	0	0	2.6509	0	0	0	2.5808	0.9132	0	0	0	0	0	0	0.798	0	0	0.9933	0	0.5426	0.7863	0.8995	0	0	0	0	0	0	0	0
AC006499.4	0	0	0	0	0	0	0	0	0	0	0	0	0	0	0	2.2479	0	0	0	0	0	0	0	0	0	0	0	0	0	0	0	0	0	0	0	0	0	0	0	0	0	0	0	0	0	0	0	0	0
AC006499.5	0	0	0	0	0	0	0	0	0	1.7919	0	0	0	0	0	0	1.3187	0	0	0	2.0915	0	0	0.9188	0	0	0	0	0	0	0	0	0	0.798	0	0	0	0	0	0	0	0	0	1.564	0	0	0.682	0	5.9282
AC006499.6	0	5.8175	0	0	0	0	0	0	0	1.7919	0	1.0922	0	0	0	1.1239	3.9562	0	1.0172	2.7011	0	0	0	0.9188	0	0	0	0	0.8221	0	0	0	0	0	0	0	0.9933	0	0	0.7863	0	0	0	1.564	0	0	0	0	0
AC006499.7	0	0	0	0	0	0	0	0	0	0	0	0	0	0	0	0	1.3187	0	0	0	0	0	0.9367	0	0	1.2904	0.9132	0	0	1.0825	0	0	0	0.798	0.978	0	1.9866	0	0.5426	0	0	0	1.8752	0	0	0	0	0	0
AC006499.9	0	0	0	0	0	0	0	0	0	0	0	0	0	0	0	0	0	0	0	0	0	0	0	0	0	0	0	0	0	0	0	0	0	0	0	0	0	0	0	0	0	0	0	0	0	0	0	0	0
AC006509.4	0	0	0	0	0	0	0	0	0	0	0	1.0922	0	0	0	0	0	0	0	0	0	0	0	0	0	0	0	0	0	0	0	0	0	0	0	0	0	0	0	0	0	0	0	0	0.8731	0	0	0	0
AC006509.7	0	0	0	0	1.4033	0	0	0	0	0	0	0	0	0	0	0	0	0	0	0.9004	0	0	0	0	0	0	0	0	0	0	0	0	0	0	0	0	0	0	0	0	0	0	0	0	0	0	0	0	0
AC006534.1	0	0	0	0	0	0	0	0	0	0	0	0	0	0	0	0	0	0	0	0	0	0	0	0	0	0	0	0	0	0	0	0	0	0	0	0	0	0	0	0	0	0	0	0	0	0	0	0	0
AC006534.2	0	0	0	0	0	0	0	0	0	0	0	0	0	0	0	0	0	0	0	0	0	0	0	0	0	0	0	0	0	0	0	0	0	0	0	0	0	0	0	0	0	0	0	0	0	0	0	0	0
AC006538.1	0	8.7263	5.6241	4.4486	8.42	3.7266	14.4086	7.295	1.9323	8.9595	1.3545	3.2766	6.8268	11.8754	3.9867	8.9914	0	5.3649	9.1552	12.6053	1.0457	6.1854	0.9367	2.7563	7.6234	0	8.2186	2.5512	1.6443	1.0825	3.6306	2.8533	4.8026	3.9902	4.8901	9.3204	6.953	9.8028	6.5113	3.9317	1.7991	3.8952	0.9376	3.9099	9.6043	2.3949	6.1382	14.5742	0
AC006538.4	0	0	3.7494	6.6729	0	3.7266	0	2.0843	1.9323	0	1.3545	0	0	0	7.9733	0	2.6374	4.5985	0	2.7011	0	9.7199	1.8733	2.7563	2.5411	0	2.7395	0	0	6.4952	7.2612	7.6089	1.921	2.3941	9.7801	4.6602	1.9866	8.9116	2.713	3.1454	7.1964	1.5581	2.8127	8.6018	5.2387	11.176	8.1843	14.5742	0
AC006538.8	16.6477	14.5438	19.6844	4.4486	5.6134	11.1797	0	2.0843	6.7629	14.3352	10.8357	14.1987	4.5512	6.5974	7.9733	11.2393	10.5498	3.0656	15.2587	8.1034	7.3202	10.6036	10.3033	7.3501	2.5411	14.1944	13.6976	6.3779	8.2214	8.6603	9.0766	14.2667	8.6446	3.9902	4.8901	7.767	3.9732	4.4558	8.1391	7.0771	6.2968	5.4533	8.4382	3.1279	4.3656	12.7725	10.9124	7.6706	23.7129
AC006539.1	0	0	0	0	0	0	0	0	0	0	0	0	0	0	0	0	0	0	0	0	0	0	0	0	0	0	0	0	0	0	0	0	0	0	0	0	0	0	0	0	0	0	0	0	0	0	0	0	0
AC006539.2	0	2.9088	1.8747	4.4486	0	8.6953	0	0	0.9661	0	0	2.1844	0	1.3195	0	2.2479	0	2.2992	2.0345	0	1.0457	2.6509	0.9367	0	1.2706	0	1.8263	1.2756	3.2886	1.0825	1.8153	0.9511	0	0	0	0.7767	0	0	1.6278	0	0	0	0	0.782	0	1.5966	0	0	0
AC006539.3	10.2447	5.8175	5.6241	15.5701	8.42	13.6641	2.8817	6.2529	7.729	1.7919	8.1268	13.1064	4.5512	10.5559	12.9567	7.8675	7.9123	4.5985	5.0862	1.8008	4.183	7.9527	9.3667	10.1064	5.0823	10.3232	3.6527	7.6535	5.755	9.7428	9.9842	9.5111	2.8815	3.1921	7.8241	2.3301	5.9597	5.347	6.5113	1.5727	8.0959	2.3371	2.8127	0.782	3.4925	2.3949	15.0045	4.6024	0
AC006547.13	144.707	573.027	282.143	110.103	150.157	79.5	233.419	415.817	113.037	455.142	197.752	603.989	144.5	143.824	122.59	109.021	143.74	101.166	265.502	104.444	145.359	73.3414	91.7932	71.6635	125.786	98.0703	99.5361	53.5743	52.617	86.603	77.1507	105.573	140.235	117.311	51.8348	97.8638	92.376	182.689	47.207	114.019	85.457	67.777	263.46	93.8374	169.385	55.8799	89.3451	94.3487	29.6412
AC006547.14	15.3671	23.2701	9.3735	34.4766	11.2267	11.1797	54.7526	16.6744	15.4581	28.6704	2.7089	14.1987	13.6536	11.8754	23.92	21.3547	15.8246	19.1602	20.345	29.7124	1.0457	15.9054	26.2266	9.1876	11.4351	7.7424	6.3922	5.1023	10.6878	5.4127	5.4459	6.6578	6.7236	9.5764	3.9121	2.3301	7.9463	3.5647	11.3948	14.9405	22.4887	3.8952	0	6.2558	4.3656	29.5365	10.2304	3.0683	29.6412
AC006547.15	0	0	0	0	0	11.1797	0	0	0	0	25.7349	0	0	0	0	0	0	9.1969	0	4.5019	0	0	0	0	0	0	0	0	0	0	0	0	0	0	0	0	0	0	0	0	0	0	0	0	0	0	0	0	17.7847
AC006547.8	0	46.5402	0	0	0	18.6328	0	0	0	0	0	0	0	0	4.9833	14.6111	26.3744	0	0	0	12.549	0	0	0	3.8117	19.356	0.9132	0	0	0	1.8153	0	0	0	0	2.3301	0	0	0	0	0	8.5695	14.0637	0	0	0	0	0	0
AC006548.19	0	0	0	0	0	0	2.8817	0	0	0	1.3545	0	0	1.3195	0	0	0	0	0	0	1.0457	0	0	0	0	0	0.9132	0	0	0	0	0	0	0	0	0	0	0	0.5426	0	0	0	0	0	0	0	0	0	0
AC006548.26	0	0	0	0	0	0	0	0	0	1.7919	0	0	0	0	0	0	0	0	0	0	0	0	0	0	0	0	0	0	0	0	0	0	0	0	0	0	0	0	0	0	0	0	0	0	0	0	0	0	0
AC006552.1	0	0	0	0	0	0	0	0	0	0	0	0	0	0	0	0	0	0	0	0	0	0	0	0	0	0	0	0	0	0	0	0	0	0	0	0	0	0	0	0	0	0	0	0	0	0	0	0	0
AC006557.1	1.2806	0	0	0	0	0	0	0	0	0	0	0	0	0	0	2.2479	1.3187	0	0	0	0	0	0	0	0	0	0	0	0	0	0.9077	0	0	0	0	0	0	0	0	0	0	0	0.9376	0	0	0	0	0	0
AC006840.1	0	0	0	0	0	0	0	0	0	0	0	0	0	0	0	0	0	0	0	0	0	0	0	0	0	0	0	0	0	0	0	0	0	0	0	0	0	0	0	0	0	0	0	0	0	0	0	0	0
AC006926.1	0	0	0	0	0	0	0	0	0	0	0	0	0	0	0	0	0	0	0	0	0	0	0	0	0	0	0	0	0	0	0	0	0	0	0	0	0	0	0	0	0	0	0	0	0	0	0	0	0
AC006942.4	1.2806	14.5438	18.747	14.4579	14.0334	13.6641	46.1075	13.5479	8.6952	44.7974	14.8992	20.7519	12.5158	17.1533	19.9334	10.1154	17.1434	45.2181	13.2242	59.4249	12.549	12.3708	9.3667	12.8627	7.6234	18.0656	9.1317	3.8267	9.0435	15.1555	5.4459	17.12	15.3682	7.1823	6.8461	24.0776	7.9463	40.1024	13.0226	12.5815	10.7946	10.9066	2.8127	12.5117	11.3505	20.7554	22.5068	14.5742	142.278
AC006946.12	8.9641	2.9088	7.4988	1.1121	7.0167	3.7266	0	3.1264	1.9323	14.3352	12.1902	14.1987	7.9646	6.5974	5.98	6.7436	13.1872	3.832	8.138	1.8008	8.366	2.6509	2.81	4.5938	10.1645	3.8712	6.3922	10.2046	1.6443	5.4127	7.2612	6.6578	5.7631	7.9803	2.934	10.0971	8.9396	0.8912	4.8835	3.1454	7.1964	6.2324	4.6879	3.1279	6.1118	7.9828	4.7742	2.3012	0
AC006946.15	0	0	0	0	1.4033	1.2422	0	1.0421	0	5.3757	0	2.1844	0	0	0.9967	0	2.6374	0.7664	1.0172	0	0	0	0	0.9188	0	0	0	0	1.6443	0	0	0	0	0	0	1.5534	0.9933	0	0	0	0	0	0	0	0.8731	0	0.682	0	0
AC006946.16	46.1012	20.3614	156.538	11.1215	12.6301	6.2109	2.8817	66.6974	10.6274	82.4273	8.1268	88.4685	5.689	19.7923	14.95	6.7436	14.5059	7.6641	34.5865	9.9041	5.2287	12.3708	11.24	33.9942	30.4936	37.4216	19.1767	42.0941	7.3993	16.2381	33.5832	16.1689	6.7236	14.3646	1.956	4.6602	14.8993	1.7823	16.8209	9.4361	9.895	58.4285	9.3758	89.9276	3.4925	8.7811	18.4146	46.7908	0
AC006946.17	2.5612	2.9088	15.935	1.1121	1.4033	1.2422	2.8817	10.4215	0	5.3757	0	16.3831	1.1378	7.9169	1.9933	6.7436	0	3.0656	3.0517	0	1.0457	1.7673	0	11.0252	0	5.1616	6.3922	16.5825	0.8221	0	0.9077	4.7556	0	0.798	1.956	3.1068	4.9664	0	2.713	0.7863	2.6986	6.2324	1.8752	10.9477	0	0	1.364	7.6706	0
AC006947.1	0	0	1.8747	1.1121	2.8067	1.2422	0	0	1.9323	1.7919	0	1.0922	1.1378	0	0.9967	1.1239	1.3187	2.2992	3.0517	0	4.183	0.8836	0	0.9188	1.2706	1.2904	3.6527	1.2756	0	1.0825	1.8153	0.9511	0.9605	1.5961	0.978	0	0	1.7823	0.5426	1.5727	0	0	0	3.1279	0	3.1931	1.364	0	0
AC006960.5	0	0	0	0	0	0	0	0	0	0	0	0	0	0	0	3.3718	0	0	0	0	0	0	0	0	0	0	0	0	0	0	0	0	0	0	0	0	0	0	0	0	0	0	0	0	0	0	0	0	0
AC006960.7	0	0	0	0	1.4033	0	0	0	0	0	0	1.0922	0	0	0	0	0	0	1.0172	0.9004	0	0	0.9367	0	1.2706	1.2904	0.9132	2.5512	0	0	0	0	0	0	0	0	0	0	1.0852	0	0	0	0	0	0	0	0	0	0
AC006978.6	80.6772	87.263	88.111	87.8596	67.3603	88.1954	92.215	84.4139	92.7485	82.4273	104.294	149.632	164.981	98.9616	123.587	102.278	130.553	130.289	94.6041	135.957	120.261	120.174	131.133	116.683	120.704	127.749	152.5	154.345	117.566	120.162	116.18	125.547	114.301	86.1878	111.494	96.3104	128.134	161.301	117.204	118.738	125.037	116.857	129.386	112.605	82.946	126.129	117.99	79.7745	47.4258
AC006987.4	0	0	0	0	0	0	0	0	0	0	0	0	0	0	0	0	0	0	0	0	0	0	0	0	0	0	0	0	0	0	0	0	0	0	0	0	0	0	0	0	0	0	0	0	0	0	0	0	0
AC006987.5	0	0	0	0	0	0	0	0	0	0	0	0	0	0	0	0	0	0	0	0	0	0	0	0	0	0	0	0	0	0	0	0	0	0	0	0	0	0	0	0	0	0	0	0	0	0	0	0	0
AC006987.6	0	0	0	0	0	0	0	0	0	0	0	0	0	0	0	0	0	0	0	0	0	0	0	0	0	0	0	0	0	0	0	0	0	0	0	0	0	0	0	0	0	0	0	0	0	0	0	0	0
AC006987.7	0	0	0	0	0	0	0	0	0	0	0	0	0	0	0	0	0	0	0	0	0	0	0	0	0	0	0	0	0	0	0	0	0	0	0	0	0	0	0	0	0	0	0	0	0	0	0	0	0
AC006988.1	0	0	0	0	0	0	0	0	0	0	0	0	0	0	0	0	0	0	0	0	0	0	0	0	0	0	0	0	0	0	0	0	0	0	0	0	0	0	0	0	0	0	0	0	0	0	0	0	0
AC006989.2	0	0	0.9374	0	0	0	0	0	0	0	0	0	0	0	0	0	0	0	0	0	0	0	0	0	0	0	0	0	0	0	0	0	0	0	0	0	0	0	0	0	0	0	0	0	0	0	0	0	0
AC006994.1	24.3312	119.259	28.1205	70.0653	74.377	101.859	34.5806	12.5058	88.884	23.2947	29.7983	30.5817	71.6813	71.2523	82.7235	53.9487	180.665	58.247	41.7072	22.5094	59.6077	46.8324	53.3899	47.7757	78.7752	167.752	51.1378	47.1964	28.7749	47.6317	64.4435	55.1645	12.4867	16.7587	21.5163	35.7281	57.6108	37.4289	42.3235	100.652	32.3837	50.638	69.3809	66.4682	29.6859	13.5708	28.645	14.5742	11.8565
AC006994.3	6.4029	2.9088	12.1856	12.2336	11.2267	6.2109	17.2903	0	23.1871	0	9.4813	5.461	4.5512	18.4728	14.95	16.859	14.5059	13.7954	9.1552	37.8158	6.2745	9.7199	3.7467	6.4313	1.2706	58.0679	17.3503	52.2987	34.5299	14.073	10.8919	8.56	0	3.1921	0	5.4369	10.9262	4.4558	21.7044	13.3678	3.5982	8.5695	60.0051	14.0756	4.3656	1.5966	17.7326	7.6706	35.5694
AC006995.8	0	0	0	0	0	0	0	0	0	0	0	0	0	0	0	0	0	0	0	0	0	0	0	0	0	0	0	0	0	0	0	0	0	0	0	0	0	0	0	0	0	0	0	0	0	0	0	0	53.3541
AC007000.10	10.2447	26.1789	18.747	6.6729	9.8234	36.0235	0	6.2529	10.6274	12.5433	12.1902	16.3831	11.378	11.8754	15.9467	17.9829	34.2867	8.4305	12.207	5.4023	10.4575	7.069	10.3033	27.5629	13.9762	37.4216	16.4371	25.5116	17.2649	17.3206	11.7995	16.1689	17.2893	16.7587	11.7362	6.9903	4.9664	5.347	15.193	15.7268	5.3973	13.2438	33.7529	16.4216	6.9849	8.7811	6.8202	22.2448	0
AC007000.12	26.8924	84.3542	49.6796	27.8037	19.6468	42.2344	69.1612	18.7586	30.9162	60.9245	20.317	46.9648	43.2363	52.7795	28.9034	35.9658	34.2867	59.0134	34.5865	74.7313	25.098	15.0217	28.1	22.9691	17.7879	32.26	32.8743	25.5116	28.7749	19.4857	18.1531	19.0222	23.0524	20.7489	22.4943	17.864	9.9329	30.2996	33.6418	15.7268	17.9909	25.7085	6.5631	28.1512	17.4623	41.5108	17.0506	27.6143	47.4258
AC007003.1	0	0	0	0	2.8067	0	0	0	0	0	1.3545	0	0	0	0	1.1239	0	0	0	0	0	0	0	0	2.5411	0	0	0	0.8221	0	0	0	0	0	0	0	0	0	0	0.7863	0	0	0	0	0.8731	0	0	0	0
AC007009.1	6.4029	14.5438	8.4362	4.4486	1.4033	0	2.8817	14.5901	1.9323	12.5433	2.7089	0	2.2756	0	3.9867	4.4957	2.6374	3.832	3.0517	0	3.1372	3.5345	5.62	1.8375	0	1.2904	3.6527	0	4.1107	0	1.8153	1.9022	1.921	2.3941	1.956	0	0	3.5647	0	0	1.7991	3.8952	6.5631	3.9099	0.8731	0	1.364	8.4377	0
AC007009.2	0	0	0	0	0	0	0	0	0	0	0	0	0	0	0	0	0	0	0	0	0	0	0	0	0	0	0	0	0	0	0	0	0	0	0	0	0	0	0	0	0	0	0	0	0	0	0	0	0
AC007016.3	1.2806	2.9088	1.8747	0	2.8067	7.4531	0	3.1264	0	5.3757	1.3545	3.2766	10.2402	2.639	6.9767	3.3718	7.9123	1.5328	5.0862	10.8045	2.0915	0	3.7467	1.8375	5.0823	3.8712	0.9132	5.1023	0.8221	1.0825	1.8153	0	3.8421	2.3941	3.9121	0.7767	1.9866	2.6735	2.1704	0	0	0.779	4.6879	0	0.8731	0	2.0461	3.0683	0
AC007036.4	37.1371	40.7227	20.6217	13.3458	9.8234	11.1797	5.7634	15.6322	6.7629	16.1271	18.9626	19.6597	14.7914	5.278	18.9367	15.735	14.5059	20.693	5.0862	14.406	7.3202	10.6036	5.62	17.4565	6.3528	16.7752	9.1317	14.0314	4.1107	14.073	4.5383	13.3156	5.7631	3.9902	3.9121	5.4369	7.9463	1.7823	8.6817	3.9317	2.6986	3.1162	13.1261	7.8198	7.858	1.5966	6.8202	2.3012	0
AC007036.5	0	0	0	2.2243	0	0	0	2.0843	4.8307	3.5838	0	12.0142	0	6.5974	6.9767	3.3718	5.2749	1.5328	12.207	0	13.5947	10.6036	0	11.0252	17.7879	10.3232	18.2635	21.6848	0	11.9079	6.3536	9.5111	2.8815	5.5862	7.8241	5.4369	12.9128	1.7823	1.6278	8.6498	9.895	2.3371	43.1286	4.6919	4.3656	0	7.5023	9.2048	0
AC007036.6	33.2953	14.5438	14.9976	6.6729	8.42	9.9375	0	6.2529	7.729	19.7109	20.317	18.5675	25.0316	6.5974	11.96	19.1068	29.0118	14.5618	12.207	21.609	16.732	15.9054	11.24	28.4816	24.1408	19.356	10.9581	17.8581	5.755	18.4031	6.3536	6.6578	4.8026	7.9803	14.6702	8.5437	17.8792	11.5851	9.2244	20.4449	13.4932	10.1276	2.8127	10.1657	6.9849	2.3949	10.2304	3.8353	0
AC007038.7	87.0801	270.515	88.111	107.878	157.174	265.828	31.6989	55.2338	124.631	93.1787	102.94	164.923	154.741	200.562	144.517	122.508	226.82	126.457	133.26	55.8234	127.581	121.941	102.097	152.515	134.68	261.951	121.452	147.967	92.9019	119.079	103.473	95.1112	44.1837	75.0153	69.439	112.621	61.584	90.0076	75.9652	150.191	76.4615	102.834	117.197	123.553	108.266	29.5365	105.714	75.9392	11.8565
AC007040.1	0	0	0	0	0	0	0	0	0	0	0	0	0	0	0	0	0	0	0	0	0	0	0	0	0	0	0	0	0	0	0	0	0	0	0	0	0	0	0	0	0	0	0	0	0	0	0	0	0
AC007040.11	10.2447	8.7263	10.3109	21.1308	7.0167	27.3281	11.5269	4.1686	4.8307	16.1271	37.9251	131.065	10.2402	14.5144	72.7568	121.385	7.9123	144.851	15.2587	202.585	10.4575	30.9271	4.6833	140.571	17.7879	241.305	44.7456	99.4951	10.6878	23.8158	33.5832	38.0445	7.6841	15.1627	6.8461	2.3301	55.6242	7.1293	90.6157	31.4537	20.6896	8.5695	10.3134	38.317	34.0515	10.3777	52.5158	39.1202	29.6412
AC007040.2	0	0	0	0	0	0	0	0	0	0	0	0	0	0	0	0	0	0	0	0	0	0	0	0	0	0	0	0	0	0	0	0	0	0	0	0	0	0	0	0	0	0	0	0	0	0	0	0	0
AC007040.3	0	0	0	0	0	0	0	0	0	0	0	0	0	0	0	0	0	0	0	0	0	0	0	0	0	0	0	0	0	0	0	0	0	0	0	0	0	0	0	0	0	0	0	0	0	0	0	0	0
AC007040.6	1.2806	0	3.7494	2.2243	4.21	1.2422	8.6452	0	2.8984	0	0	0	4.5512	3.9585	2.99	0	0	5.3649	1.0172	0	3.1372	0	1.8733	4.5938	0	2.5808	0	0	0	1.0825	0	2.8533	2.8815	1.5961	0	0	0	0.8912	0.5426	1.5727	0	0	0	2.3459	0.8731	1.5966	0	1.5341	35.5694
AC007040.8	0	0	0	0	0	0	0	1.0421	0	0	0	0	0	0	0	1.1239	0	0	0	0	0	0	0	2.7563	0	0	0	0	0	0	0	0	0	0	0	0	0	0	0	0	0	0	0	0	0.8731	0	0	0	0
AC007041.2	0	2.9088	0.9374	2.2243	4.21	2.4844	2.8817	5.2107	1.9323	1.7919	0	0	4.5512	2.639	2.99	3.3718	1.3187	0.7664	0	0.9004	6.2745	0.8836	2.81	1.8375	1.2706	2.5808	4.5659	0	0	2.1651	1.8153	1.9022	1.921	3.9902	0.978	0.7767	0.9933	0	2.713	1.5727	1.7991	0	3.7503	3.1279	0.8731	0.7983	2.7281	0	0
AC007050.1	0	0	0	0	0	0	0	0	0	0	0	0	0	0	0	0	0	0	0	0	0	0	0	0	0	0	0	0	0	0	0	0	0	0	0	0	0	0	0	0	0	0	0	0	0	0	0	0	0
AC007050.17	64.0295	14.5438	27.1832	38.9251	8.42	6.2109	14.4086	22.9272	14.492	17.919	28.4438	17.4753	9.1024	13.1949	14.95	11.2393	19.7808	11.4961	12.207	23.4098	7.3202	13.2545	16.86	22.0503	2.5411	6.452	8.2186	6.3779	3.2886	4.3302	7.2612	0.9511	6.7236	7.9803	5.8681	6.9903	0	8.9116	11.9374	1.5727	10.7946	4.6743	5.6255	5.4739	6.1118	15.9657	6.8202	9.2048	5.9282
AC007050.18	8.9641	2.9088	0	0	0	0	0	2.0843	0.9661	5.3757	2.7089	3.2766	0	0	0.9967	1.1239	0	0.7664	0	0.9004	0	2.6509	0	0.9188	0	0	0	3.8267	0	0	0.9077	0	0	0	0	0	0	0	1.0852	0	0	0	0	1.564	0	0	0	0	0
AC007056.1	0	0	0	0	0	0	0	0	0	0	0	0	0	0	0	0	0	0	0	0	0	0	0	0	0	0	0	0	0	0	0	0	0	0	0	0	0	0	0	0	0	0	0	0	0	0	0	0	0
AC007064.22	0	0	0	0	0	0	0	0	0	0	0	0	0	0	0	0	0	0	0	0.9004	0	0	0	0	0	0	0	0	0	0	0	0	0	0	0	0	0	0	0	0	0	0	0	1.564	0	0	0	0	0
AC007064.24	15.3671	8.7263	8.4362	2.2243	9.8234	14.9063	14.4086	8.3372	10.6274	10.7514	28.4438	13.1064	11.378	15.8339	16.9434	14.6111	19.7808	8.4305	10.1725	0	9.4117	7.069	14.9866	12.8627	7.6234	21.9368	4.5659	12.7558	4.1107	5.4127	7.2612	3.8044	9.6052	5.5862	2.934	4.6602	1.9866	1.7823	7.0539	2.359	3.5982	3.1162	1.8752	11.7297	3.4925	3.9914	0	3.0683	5.9282
AC007064.25	0	0	0	0	0	0	0	1.0421	0	0	0	0	1.1378	1.3195	0	0	0	0	0	0	0	0.8836	0	0	0	0	0	0	1.6443	0	0	0	1.921	0	0	0	0	0	0	0	0	0.779	0	1.564	0	0	0	0	0
AC007078.4	15.3671	0	0	8.8972	0	0	8.6452	22.9272	6.7629	10.7514	8.1268	15.2909	9.1024	10.5559	7.9733	0	23.737	3.0656	8.138	1.8008	4.183	7.069	5.62	4.5938	16.5174	0	5.479	5.1023	3.2886	5.4127	5.4459	14.2667	9.6052	0	4.8901	7.767	0	7.1293	3.7983	1.5727	0.8995	4.6743	4.6879	0	3.4925	0	2.7281	4.6024	0
AC007091.1	0	0	0	0	0	0	0	0	0	0	0	0	0	0	0	0	0	0	0	0	0	0	0	0	0	0	0	0	0	0	0	0	0	0	0	0	0	0	0	0	0	0	0	0	0	0	0	0	0
AC007096.1	0	0	0	0	0	0	0	0	0	0	0	0	0	0	0	0	0	0	0	0	0	0	0	0	0	0	0	0	0	0	0	0	0	0	0	0	0	0	0	0	0	0	0	0	0	0	0	0	0
AC007098.1	3.8418	0	0	0	0	1.2422	0	0	0.9661	1.7919	8.1268	0	3.4134	0	0	3.3718	0	0	1.0172	3.6015	0	2.6509	0	1.8375	2.5411	0	0.9132	0	0	0	0	0.9511	0.9605	0	0	0	0	0	0	2.359	0	1.5581	0.9376	0.782	0	0	0	0	0
AC007099.1	101.167	174.526	55.3037	96.7568	95.4271	83.2266	48.9892	39.6016	98.5453	35.838	90.7494	43.6882	149.052	47.5016	117.607	101.154	130.553	46.7509	85.4489	45.0188	106.666	75.9922	36.53	39.5068	29.2231	126.459	94.057	52.2987	20.5535	74.6951	25.4144	40.8978	0	32.7194	51.8348	40.3882	26.8188	59.708	18.4487	72.3434	66.5665	56.8704	56.2548	33.6251	29.6859	2.3949	34.1012	74.4051	29.6412
AC007099.2	0	0	0	0	0	0	0	0	0	0	0	0	0	0	0	1.1239	1.3187	0	0	2.7011	0	0	0	0	0	0	0	0	0	1.0825	0	0	0	0	0.978	0	0	0	0	0	0	0	0	0	0	0	0	0	0
AC007106.1	0	0	0	0	0	0	0	0	0	0	0	0	0	0	0	0	0	0	0	0	0	0	0	0	0	0	0	0	0	0	0	0	0	0	0	0	0	0	0	0	0	0	0	0	0	0	0	0	0
AC007115.3	0	0	0	0	0	0	0	0	0	0	0	0	0	0	0	0	0	0	0	0	0	0	0	0	0	0	0	0	0	0	0	0	0	0	0	0	0	0	0	0	0	0	0	0	0	0	0	0	0
AC007126.1	7.6835	8.7263	7.4988	0	2.8067	94.4063	2.8817	11.4636	0.9661	19.7109	23.026	14.1987	23.8938	9.2364	13.9534	19.1068	15.8246	15.3282	6.1035	39.6166	21.9607	17.6726	3.7467	34.913	6.3528	51.6159	10.9581	17.8581	5.755	11.9079	2.723	2.8533	0	3.1921	20.5383	20.9708	7.9463	21.3879	14.1078	7.8634	14.3928	25.7085	8.4382	10.9477	9.6043	1.5966	5.4562	14.5742	0
AC007128.1	0	0	0	5.5607	0	0	0	1.0421	0	0	1.3545	0	0	0	0	0	0	0	8.138	0	0	0	0	0	0	0	0	0	0	0	0	0	0	0.798	0	0	11.9195	0	0	43.2488	0	0	4.6879	0	0	0	4.0921	0	0
AC007131.1	0	0	0	0	0	0	0	0	0	1.7919	0	2.1844	1.1378	0	0.9967	0	0	0	0	0	0	0.8836	0	0	0	0	1.8263	0	0	0	0	0.9511	0	0	0	0	0	0	0	0	0	0	0	0	0	0	0	0	0
AC007131.2	0	0	0	0	0	0	0	0	0	0	0	1.0922	0	0	1.9933	0	0	0	0	0	0	0.8836	0	0.9188	0	0	0	0	0	0	0	0	0	0	0	0	0.9933	0	0	0	0	0	0.9376	0	0	0	0	0	0
AC007131.3	0	0	0	0	0	0	0	0	0	0	0	0	0	0	0	0	0	0	0	0	0	0	0	0	0	0	0	0	0	0	0	0	0	0	0	0	0	0	0	0	0	0	0	0	0	0	0	0	0
AC007136.1	0	0	0	0	0	0	0	0	0	0	0	0	0	0	0	0	0	0	0	0	0	0	0	0	0	0	0	0	0	0	0	0	0	0	0	0	0	0	0	0	0	0	0	0	0	0	0	0	0
AC007161.5	15.3671	49.449	19.6844	18.9065	19.6468	28.5703	0	30.2223	12.5597	37.6299	21.6715	19.6597	27.3072	25.0703	23.92	26.9743	34.2867	21.4594	22.3795	11.7049	29.281	13.2545	24.3533	21.1315	55.905	37.4216	17.3503	19.1337	17.2649	31.3936	22.6914	26.6311	35.5391	19.1528	11.7362	24.0776	12.9128	11.5851	14.1078	16.5132	17.9909	19.4762	29.065	16.4216	20.9548	19.9571	15.0045	36.052	23.7129
AC007163.10	0	2.9088	0	0	0	0	0	1.0421	0	0	0	0	1.1378	0	0	0	0	0	2.0345	0	0	0	0	0	0	2.5808	0	1.2756	0	1.0825	0	0	0	0.798	0	0	0	0	0	0	0	0	0	0	0	0	0	0	0
AC007163.11	1.2806	2.9088	0	0	0	1.2422	0	0	0	0	0	0	2.2756	0	0	0	0	0	0	0	0	0.8836	0	0	0	1.2904	0	0	0	0	0	0	0	0	0	0	0	0	0	0	0	0	0	0	0	0	0	0	0
AC007163.3	1.2806	0	0.9374	0	0	1.2422	0	0	0	0	0	1.0922	0	0	0	0	0	0	0	0	0	2.6509	0	2.7563	0	0	0	0	1.6443	0	0	0	0	0	0.978	0	0	0.8912	0	0	0.8995	0	0	0	0	0.7983	0	0	0
AC007163.6	10.2447	8.7263	4.6868	4.4486	2.8067	3.7266	0	5.2107	0	7.1676	6.7723	6.5532	0	2.639	1.9933	4.4957	1.3187	5.3649	3.0517	7.203	3.1372	0.8836	0.9367	0.9188	5.0823	3.8712	2.7395	0	0.8221	2.1651	0	3.8044	5.7631	2.3941	5.8681	0.7767	1.9866	1.7823	6.5113	1.5727	4.4977	1.5581	3.7503	3.1279	3.4925	35.1245	3.4101	3.8353	59.2823
AC007163.8	1.2806	2.9088	0.9374	3.3364	0	0	0	0	0	0	0	0	4.5512	0	1.9933	1.1239	0	0	1.0172	0	0	0.8836	0	0	1.2706	6.452	2.7395	0	0	0	0.9077	0	0.9605	0	0.978	0	0	0	0	0.7863	0	0	1.8752	0.782	0	0	0.682	4.6024	0
AC007163.9	0	0	0	2.2243	0	1.2422	0	0	0	0	1.3545	2.1844	0	0	0.9967	0	0	0	0	0	0	0	0	0.9188	0	0	1.8263	0	0.8221	1.0825	0.9077	0	2.8815	0	0.978	0	0	0	0	2.359	0	1.5581	0	0.782	0.8731	0	0.682	3.8353	0
AC007179.1	0	0	0	0	0	0	0	0	0.9661	0	0	1.0922	0	0	0	0	0	0	0	0	0	0.8836	0	0	0	1.2904	0	0	0	0	1.8153	0	0.9605	0	0.978	0	0	0	0	0	0	0.779	0	0	0	0	0	0	0
AC007179.2	0	0	0	0	0	0	0	0	0	0	0	0	0	0	0	0	0	0	0	0	0	0	0	0	0	0	0	0	0	0	0	0	0	0	0	0	0	0	0	0	0	0	0	0	0	0	0	0	0
AC007182.6	3.8418	5.8175	1.8747	4.4486	0	0	0	9.3793	3.8645	0	2.7089	3.2766	3.4134	0	12.9567	0	5.2749	10.7297	0	9.0038	0	1.7673	1.8733	0	0	0	3.6527	5.1023	8.2214	0	0	0	1.921	3.1921	2.934	2.3301	0	6.2381	3.2557	0	0	0	0	1.564	0	18.3605	2.7281	0	77.067
AC007191.4	99.886	87.263	83.4243	65.6167	46.3102	111.797	17.2903	52.1074	75.3581	105.722	154.409	67.7166	51.2009	91.0447	46.8434	61.8162	121.322	55.1814	59.0004	49.5207	59.6077	76.8759	50.5799	129.546	57.1755	158.719	66.6618	71.4324	37.8185	76.8602	54.4593	28.5333	71.0781	57.4585	61.6149	72.2328	54.6309	54.361	91.1583	68.4117	50.3746	61.5447	62.8178	63.3403	70.7224	61.4679	77.0687	52.1603	112.636
AC007192.6	3.8418	0	0	0	4.21	4.9688	0	0	10.6274	0	2.7089	0	2.2756	21.1118	0	5.6197	5.2749	0	0	0	1.0457	9.7199	0	2.7563	8.894	2.5808	0	3.8267	1.6443	0	14.5225	1.9022	0	7.9803	6.8461	3.8835	0	0	4.3409	0	7.1964	0	0	10.1657	4.3656	0	8.8663	7.6706	0
AC007193.10	2.5612	0	2.8121	0	0	12.4219	0	1.0421	0	0	5.4179	2.1844	3.4134	0	2.99	2.2479	0	0	2.0345	1.8008	0	0	0	4.5938	5.0823	2.5808	0	3.8267	0	7.5778	0	0	2.8815	2.3941	0	1.5534	0	0.8912	0	0	0	3.1162	0	0.782	0	0.7983	0	0	0
AC007193.6	1.2806	0	0	0	0	0	0	0	0	14.3352	0	0	0	0	0	0	0	0.7664	0	3.6015	0	0	0	0	0	0	0	0	0.8221	0	0	0	1.921	0	0	0	0	0	0	0	0	2.3371	0	0	0	0	0.682	0	0
AC007193.8	0	0	0	0	0	0	0	0	0	0	0	0	0	0	0	0	0	0	0	0	0	0	0	0	0	0	0	0	0	0	0	0	0	0	0	0	0	0	0	0	0	0	0	0	0	0	0	0	0
AC007193.9	5.1224	0	0	0	0	0	0	0	1.9323	0	0	0	0	0	0	0	0	0	0	0	0	0	0	0	6.3528	16.7752	0	0	0	0	0.9077	0	0	0	0	0	0	0	0	0	0	2.3371	0	0	0	0	0	0	0
AC007216.1	0	0	0	0	0	0	0	0	0	0	0	0	0	0	0	0	0	0	0	0	0	0	0	0	0	0	0	0	0	0	0	0	0	0	0	0	0	0	0	0	0	0	0	0	0	0	0	0	0
AC007228.11	24.3312	31.9964	16.8723	23.3551	23.8568	23.6016	60.5161	10.4215	26.0855	10.7514	5.4179	19.6597	26.1694	19.7923	22.9234	16.859	59.3424	26.8243	17.2932	18.9079	17.7777	19.4399	10.3033	22.0503	26.6819	38.712	15.524	19.1337	6.5771	23.8158	18.1531	33.2889	11.5262	7.1823	7.8241	3.1068	18.8725	8.0205	14.6504	22.8039	18.8905	10.1276	14.0637	17.2035	11.3505	9.5794	20.4607	16.8754	17.7847
AC007229.3	0	2.9088	0	0	1.4033	0	0	4.1686	0.9661	0	1.3545	2.1844	2.2756	1.3195	0	0	1.3187	0	0	0	3.1372	2.6509	0.9367	1.8375	0	0	0	2.5512	0	4.3302	1.8153	1.9022	0.9605	2.3941	0	0.7767	0.9933	0.8912	0.5426	1.5727	0	1.5581	1.8752	0	0.8731	0	1.364	4.6024	0
AC007237.2	2.5612	5.8175	3.7494	2.2243	0	3.7266	0	2.0843	1.9323	0	9.4813	5.461	0	3.9585	0	2.2479	7.9123	6.1313	1.0172	9.0038	4.183	2.6509	1.8733	3.6751	8.894	9.0328	7.3054	3.8267	0	3.2476	0.9077	4.7556	0	1.5961	4.8901	0.7767	0.9933	0	0	4.718	3.5982	0	0	0.782	1.7462	0.7983	3.4101	1.5341	0
AC007238.1	11.5253	2.9088	11.2482	8.8972	16.8401	14.9063	11.5269	12.5058	19.3226	19.7109	32.5072	13.1064	17.067	7.9169	13.9534	13.4872	7.9123	16.0946	12.207	8.1034	17.7777	18.5562	10.3033	8.2689	8.894	10.3232	12.7844	11.4802	13.1542	14.073	9.9842	4.7556	8.6446	17.5568	19.5603	20.1941	10.9262	13.3675	11.3948	24.3766	6.2968	18.6971	24.3771	7.8198	18.3354	17.5622	9.5483	15.3413	23.7129
AC007241.1	0	0	0	0	0	0	0	0	0	0	0	0	0	0	0	0	0	0	0	0	0	0	0	0	0	0	0	0	0	0	0	0	0	0	0	0	0	0	0	0	0	0	0	0	0	0	0	0	0
AC007242.1	0	0	0	0	0	0	0	0	0	0	0	0	0	0	0	0	0	0	0	0	0	0	0	0	0	0	0	0	0	0	0	0	0	0	0	0	0	0	0	0	0	0	0	0	0	0	0	0	0
AC007246.3	38.4177	34.9052	41.2435	42.2616	60.3436	44.7188	69.1612	30.2223	47.3404	39.4218	94.8128	62.2556	39.8229	35.6262	90.6968	62.9401	43.5178	123.392	34.5865	91.8384	58.5619	70.6905	45.8966	94.6325	34.3053	129.04	81.2726	121.18	40.2849	48.7142	27.2297	59.92	29.776	45.488	46.9447	43.495	53.6377	40.9935	100.925	62.121	36.8814	45.1847	80.6318	51.6106	46.2751	43.1073	75.7046	51.3932	112.636
AC007248.7	1.2806	2.9088	0.9374	3.3364	0	1.2422	0	0	0	0	1.3545	0	0	1.3195	0	0	2.6374	1.5328	0	2.7011	2.0915	2.6509	0	0.9188	0	0	0	0	2.4664	0	0	0	0	1.5961	3.9121	0.7767	0	0	0.5426	0	0	0	0	0	0	0	0	0.7671	0
AC007250.4	1.2806	0	0	0	1.4033	0	0	0	0	0	0	0	0	1.3195	3.9867	0	0	0	0	0	2.0915	0	0	0	0	0	0	0	0	0	0	0	0	0	0	0	0	0.8912	0.5426	0.7863	0	0	1.8752	0	0	0	0	0	0
AC007251.2	0	0	0	0	0	0	0	0	0	0	0	0	0	0	0	0	0	0	2.0345	0	1.0457	0	0	0.9188	0	0	0.9132	0	0	0	0	0	0.9605	0	0	0	0	0	0	0	0	0	0	0	0	0	0	0.7671	0
AC007253.1	0	0	0	0	1.4033	0	0	1.0421	0	0	0	0	0	1.3195	0	0	0	0	0	0	0	0	0	0	0	0	0	0	0	0	0	0	0.9605	0	0	0	0	0	0.5426	0	0	0	0	0	0	0	0	0	0
AC007255.8	20.4894	5.8175	3.7494	6.6729	18.2434	11.1797	8.6452	27.0958	15.4581	39.4218	12.1902	21.8441	5.689	17.1533	12.9567	28.0983	47.4739	12.2625	17.2932	18.9079	12.549	21.2071	13.1133	28.4816	29.2231	36.1312	12.7844	14.0314	6.5771	12.9905	16.3378	17.12	2.8815	8.7784	8.8021	11.6505	18.8725	9.8028	18.4487	18.0859	21.5891	13.2438	3.7503	13.2936	6.9849	9.5794	10.2304	4.6024	0
AC007256.5	62.7489	34.9052	42.1808	57.8316	70.167	212.414	5.7634	45.8545	48.3065	41.2136	37.9251	135.433	64.8545	56.738	67.7735	33.7179	127.916	53.6486	40.6899	103.543	131.764	44.1815	34.6566	69.826	182.962	113.555	46.5719	65.0545	39.4627	64.9523	43.5675	79.8934	56.6704	47.8821	38.1426	78.4464	35.7584	93.5722	36.3548	75.4888	41.3792	59.2075	30.9401	53.1746	101.281	13.5708	36.1473	79.0075	5.9282
AC007271.3	0	0	0	0	0	0	0	0	0	0	0	0	0	0	1.9933	0	1.3187	0	0	0	0	0	0	0	0	0	0	0	0	0	0	0	0	0	0	0	0	0	0	0	0	0.779	0	0	0	0.7983	0	0	0
AC007272.3	3.8418	8.7263	6.5615	3.3364	2.8067	4.9688	0	0	0	0	10.8357	1.0922	1.1378	0	4.9833	3.3718	0	0	8.138	0	3.1372	2.6509	5.62	5.5126	2.5411	12.904	1.8263	5.1023	0.8221	1.0825	4.5383	1.9022	0.9605	2.3941	2.934	3.1068	0	0	2.1704	0.7863	0.8995	0	3.7503	2.3459	0	0	0	1.5341	0
AC007274.2	0	0	0	0	0	0	0	0	0	0	0	0	0	0	0	0	0	0	0	0	0	0	0	0	0	0	0	0	0	0	0	0	0	0	0	0	0	0	0	0	0	0	0	0	0	0	0	0	0
AC007274.5	0	0	0	0	0	0	0	0	0	0	0	0	0	0	0	0	0	0	0	0	0	0	0	0	0	0	0	0	0	0	0	0	0	0	0	0	0	0	0	0	0	0	0	0	0	0	0	0	0
AC007277.3	16.6477	0	0	0	0	2.4844	2.8817	0	0	0	4.0634	5.461	0	1.3195	0.9967	0	0	3.0656	0	4.5019	0	7.069	3.7467	2.7563	6.3528	3.8712	0.9132	5.1023	0.8221	3.2476	0	13.3156	0	0.798	0	0	0.9933	0	0.5426	5.5044	0.8995	0	0	0.782	2.6193	0.7983	0.682	0	0
AC007278.2	38.4177	2.9088	4.6868	3.3364	7.0167	0	0	2.0843	1.9323	5.3757	0	2.1844	0	0	0	0	3.9562	0.7664	5.0862	0	2.0915	4.4182	10.3033	11.0252	0	0	4.5659	2.5512	1.6443	0	0	1.9022	0.9605	0	2.934	6.2136	0.9933	0	3.2557	0	1.7991	1.5581	0	0.782	0	0	1.364	0	0
AC007278.3	72.9936	5.8175	4.6868	3.3364	1.4033	7.4531	0	4.1686	0.9661	12.5433	5.4179	2.1844	0	2.639	1.9933	2.2479	5.2749	2.2992	7.1207	1.8008	5.2287	1.7673	1.8733	6.4313	3.8117	6.452	3.6527	3.8267	1.6443	1.0825	0.9077	1.9022	1.921	3.1921	1.956	4.6602	0	0	3.2557	1.5727	1.7991	2.3371	0.9376	0	1.7462	2.3949	4.7742	0	0
AC007279.2	29.4536	40.7227	33.7446	38.9251	42.1002	44.7188	31.6989	10.4215	51.2049	44.7974	32.5072	52.4258	40.9607	31.6677	36.8767	32.594	35.6054	39.0868	23.3967	54.923	30.3267	32.6943	21.5433	32.1567	26.6819	29.6792	32.8743	14.0314	24.6642	12.9905	9.9842	28.5333	14.4077	30.3253	16.6262	31.0679	22.8457	25.8438	22.7896	27.522	27.886	31.9409	24.3771	16.4216	27.0666	18.3605	20.4607	19.9436	0
AC007282.6	0	0	0.9374	0	1.4033	0	0	0	0	0	0	1.0922	2.2756	0	0	0	0	0.7664	1.0172	0	0	0.8836	0	0	0	1.2904	0.9132	0	0	0	0	0	0	0	0.978	1.5534	0	0	0	0	0.8995	0.779	0	0	0.8731	0.7983	0	2.3012	0
AC007283.4	6.4029	14.5438	0.9374	6.6729	11.2267	2.4844	8.6452	5.2107	1.9323	7.1676	1.3545	2.1844	5.689	5.278	4.9833	5.6197	3.9562	1.5328	2.0345	0	2.0915	3.5345	4.6833	4.5938	1.2706	2.5808	4.5659	2.5512	1.6443	1.0825	4.5383	0	0.9605	1.5961	0.978	1.5534	1.9866	3.5647	4.8835	3.9317	1.7991	0.779	3.7503	3.1279	0.8731	1.5966	0	1.5341	5.9282
AC007283.5	14.0865	2.9088	0.9374	0	0	17.3906	0	14.5901	14.492	25.0866	5.4179	13.1064	0	25.0703	0	0	0	0	13.2242	0	29.281	0	0	15.619	0	33.5504	2.7395	25.5116	25.4864	10.8254	0	0	14.4077	11.1725	0	2.3301	0	0	7.5965	2.359	0	18.6971	5.6255	0	0	0	0	9.9718	0
AC007285.6	23.0506	20.3614	10.3109	20.0186	12.6301	6.2109	34.5806	33.3487	18.3565	44.7974	31.1528	24.0285	13.6536	14.5144	12.9567	12.3632	22.4182	23.7587	20.345	11.7049	12.549	15.9054	12.1767	15.619	12.7057	12.904	8.2186	11.4802	18.0871	16.2381	9.9842	13.3156	17.2893	8.7784	9.7801	8.5437	6.953	8.9116	9.767	7.8634	16.1918	18.6971	7.5006	24.2413	14.843	12.7725	12.2764	16.1083	88.9235
AC007285.7	7.6835	2.9088	2.8121	11.1215	2.8067	6.2109	0	3.1264	0.9661	8.9595	8.1268	5.461	3.4134	3.9585	5.98	7.8675	2.6374	4.5985	12.207	1.8008	1.0457	0	3.7467	7.3501	3.8117	6.452	3.6527	3.8267	2.4664	2.1651	2.723	1.9022	1.921	4.7882	0.978	1.5534	0	0.8912	3.2557	2.359	1.7991	0	1.8752	3.1279	0.8731	1.5966	0.682	4.6024	0
AC007292.3	57.6265	81.4454	63.7399	93.4203	85.6038	60.8672	74.9247	38.5594	44.442	136.184	43.343	53.518	62.5789	76.5303	80.7302	69.6837	71.2109	91.969	96.6386	68.4286	53.3332	77.7595	54.3266	71.6635	44.4699	64.5199	31.0479	42.0941	27.9528	45.4666	34.4909	50.4089	19.2103	35.1135	22.4943	22.5242	43.7048	65.055	71.6244	47.1805	37.781	14.0228	10.3134	44.5728	35.7978	91.8027	48.4237	42.9555	41.4976
AC007292.4	1.2806	8.7263	2.8121	0	4.21	1.2422	0	1.0421	0.9661	1.7919	0	1.0922	0	3.9585	0.9967	0	5.2749	5.3649	1.0172	2.7011	2.0915	3.5345	0.9367	2.7563	0	1.2904	1.8263	0	0.8221	0	0	0	0	0	0.978	0	0.9933	0.8912	2.1704	0.7863	0.8995	0.779	0	1.564	0.8731	1.5966	1.364	0	0
AC007292.6	28.173	17.4526	15.935	15.5701	16.8401	11.1797	37.4623	16.6744	12.5597	28.6704	14.8992	26.2129	23.8938	22.4313	11.96	20.2307	14.5059	19.9266	23.3967	63.9268	25.098	17.6726	28.1	17.4565	20.3291	19.356	19.1767	20.4093	10.6878	11.9079	9.0766	14.2667	6.7236	9.5764	8.8021	5.4369	18.8725	14.2586	16.8209	8.6498	18.8905	3.8952	3.7503	14.0756	12.2236	31.1331	12.9585	19.1766	23.7129
AC007292.7	1.2806	0	0.9374	1.1121	1.4033	0	2.8817	0	0	0	0	0	1.1378	0	0	1.1239	0	0.7664	2.0345	2.7011	0	0	0	0.9188	0	0	0	0	0	0	0	0	0	0	0.978	0	0	0.8912	1.6278	0	0	0	0	0.782	0	0	1.364	0	0
AC007308.6	131.901	90.1717	72.1761	98.9811	74.377	150.305	126.796	107.341	65.6968	182.774	85.3315	146.355	89.8861	96.3226	93.6868	114.641	109.454	104.998	106.811	138.658	82.6142	72.4577	107.716	101.983	87.6692	110.974	63.0091	57.401	50.9727	58.4571	45.3828	58.0178	57.6309	51.8723	58.6809	66.0192	48.6712	108.722	68.3687	40.8898	60.2697	39.7314	16.8764	50.8286	61.1181	103.777	33.4192	23.7789	177.847
AC007308.7	0	0	0	0	0	0	0	0	0	0	0	0	0	0	0	0	0	0	0	0	0	0	0	0	0	0	0	0	0	0	0	0	0	0	0	0	0	0	0	0	0	0	0	0	0	0	0	0	0
AC007312.3	5.1224	5.8175	1.8747	2.2243	2.8067	3.7266	0	4.1686	1.9323	5.3757	2.7089	3.2766	0	5.278	0.9967	2.2479	1.3187	2.2992	4.069	4.5019	1.0457	0.8836	0.9367	1.8375	5.0823	1.2904	2.7395	0	0.8221	1.0825	0.9077	0.9511	1.921	0.798	0	0.7767	0.9933	2.6735	1.6278	0	0.8995	0	4.6879	0.782	0	0.7983	0	0	0
AC007317.1	0	2.9088	3.7494	0	0	0	0	0	0	0	0	0	0	0	0	1.1239	0	0.7664	4.069	0	1.0457	0	0	0	0	0	0	0	0	0	0.9077	0	0	0	0	0	0	0	0	0	0	0	4.6879	0	0	0	0	0	0
AC007318.5	6.4029	125.077	97.4845	23.3551	60.3436	63.3516	31.6989	95.8775	48.3065	37.6299	77.2047	66.6244	43.2363	47.5016	41.8601	52.8247	18.4621	26.8243	46.7934	7.203	63.7907	35.3452	59.9466	22.0503	83.8575	12.904	64.8354	45.9208	69.0598	53.0444	61.7206	54.2134	59.5519	63.8428	78.2412	53.5921	58.6041	27.6261	28.7583	40.1034	89.9547	54.5332	82.507	50.0466	95.1696	7.9828	36.8293	182.561	5.9282
AC007319.1	83.2383	46.5402	31.8699	31.1401	30.8735	69.5625	2.8817	77.1189	39.6113	21.5028	23.026	32.7661	28.445	36.9457	35.8801	32.594	92.3104	17.6274	31.5347	9.0038	31.3725	25.6253	19.67	50.5319	49.5521	61.9391	23.7425	19.1337	24.6642	23.8158	15.4301	29.4845	35.5391	19.9509	22.4943	12.4272	5.9597	16.041	20.0765	29.881	5.3973	22.5923	39.3783	26.5873	13.9699	9.5794	17.7326	17.6424	5.9282
AC007322.1	0	0	0	0	0	0	0	0	0	0	0	0	0	0	0	0	0	0	0	0	0	0	0	0	0	0	0	0	0	0	0	0	0	0	0	0	0	0	0	0	0	0	0	0	0	0	0	0	0
AC007322.3	0	0	0	0	0	0	0	0	0	0	0	0	0	0	0	0	0	0	0	0	0	0	0	0	0	0	0	0	0	0	0	0	0	0	0	0	0	0	0	0	0	0	0	0	0	0	0	0	0
AC007322.5	0	0	0	0	0	0	0	0	0	0	0	0	0	0	0	0	0	0	0	0	0	0	0	0	0	0	0	0	0	0	0	0	0	0	0	0	0	0	0	0	0	0	0	0	0	0	0	0	0
AC007322.7	0	0	0	0	0	0	0	0	0	0	0	0	0	0	0	0	0	0	0	0	0	0	0	0	0	0	0	0	0	0	0	0	0	0	0	0	0	0	0	0	0	0	0	0	0	0	0	0	0
AC007326.10	0	0	0	0	1.4033	0	0	1.0421	0	0	0	0	0	1.3195	0	0	0	0	0	0.9004	0	0	0	0	0	0	0	0	0	1.0825	0	0	6.7236	0	0.978	0	0	0	0	1.5727	0	0.779	0	0.782	0.8731	0.7983	0	0	0
AC007326.9	1.2806	52.3578	4.6868	30.028	105.251	0	17.2903	3.1264	54.1033	48.3812	5.4179	7.6454	6.8268	190.006	9.9667	14.6111	6.5936	6.1313	14.2415	0.9004	9.4117	6.1854	1.8733	0	1.2706	1.2904	1.8263	6.3779	15.6207	11.9079	6.3536	0	11.5262	17.5568	3.9121	3.8835	9.9329	6.2381	0.5426	24.3766	7.1964	0	3.7503	12.5117	34.9246	0	4.0921	9.9718	0
AC007327.5	1.2806	8.7263	0.9374	1.1121	0	0	0	4.1686	0	0	1.3545	1.0922	0	0	0	2.2479	0	2.2992	2.0345	0	1.0457	2.6509	3.7467	0.9188	1.2706	2.5808	0	1.2756	1.6443	2.1651	3.6306	3.8044	0.9605	4.7882	0	1.5534	2.9799	0	0	1.5727	0	2.3371	4.6879	0.782	0.8731	0.7983	2.0461	0	0
AC007327.6	2.5612	11.6351	1.8747	3.3364	0	4.9688	0	4.1686	0	1.7919	1.3545	2.1844	1.1378	1.3195	0.9967	5.6197	1.3187	0	5.0862	0.9004	1.0457	0.8836	0.9367	0.9188	0	2.5808	1.8263	2.5512	0	1.0825	1.8153	0.9511	0.9605	4.7882	0.978	0	0	0.8912	0	0	0	1.5581	3.7503	0	0	2.3949	2.0461	7.6706	0
AC007333.1	0	0	0	0	0	0	0	0	0	0	0	0	0	0	0	0	0	0	0	0	0	0	0	0	0	0	0	0	0	0	0	0	0	0	0	0	0	0	0	0	0	0	0	0	0	0	0	0	0
AC007339.1	0	0	0	0	0	0	0	0	0	0	0	0	0	0	0	0	0	0	0	0	0	0	0	0	0	0	0	0	0	0	0	0	0	0	0	0	0	0	0	0	0	0	0	0	0	0	0	0	0
AC007347.1	1.2806	0	0	0	0	0	0	0	0	1.7919	0	0	0	0	0	0	0	0	0	0	0	0	0	0	0	0	0	0	0	0	0	0	0	0	0	0	0	0	0	0	0	0	0	0	0	0	0	0	0
AC007349.4	5.1224	20.3614	4.6868	3.3364	0	0	2.8817	0	0.9661	0	12.1902	1.0922	7.9646	0	6.9767	1.1239	6.5936	3.0656	29.5002	0.9004	4.183	2.6509	0.9367	2.7563	0	7.7424	1.8263	2.5512	42.7513	2.1651	1.8153	0	0.9605	0	0.978	1.5534	4.9664	0.8912	1.0852	0	1.7991	0	6.5631	0.782	0	0.7983	6.8202	3.8353	0
AC007349.5	1.2806	0	0	0	1.4033	0	0	0	1.9323	1.7919	1.3545	2.1844	0	0	3.9867	2.2479	2.6374	1.5328	8.138	0	2.0915	2.6509	0.9367	0.9188	2.5411	6.452	0	0	1.6443	0	1.8153	0.9511	0	0	0.978	0.7767	2.9799	0	0.5426	0.7863	4.4977	0.779	12.1885	0	0	0.7983	2.7281	1.5341	0
AC007349.7	1.2806	5.8175	0	2.2243	0	0	0	0	0.9661	0	2.7089	1.0922	0	0	0	1.1239	0	1.5328	2.0345	0.9004	0	1.7673	0	0	1.2706	0	0	0	0	1.0825	0	0.9511	0	0	0.978	0	0	0.8912	1.6278	0	0	0	3.7503	0	0	0.7983	1.364	0	0
AC007358.1	0	0	0	0	0	0	0	0	0	0	0	0	0	0	0	0	0	0	0	0	0	0	0	0	0	0	0	0	0	0	0	0	0	0	0	0	0	0	0	0	0	0	0	0	0	0	0	0	0
AC007359.6	0	0	0	0	0	0	0	0	0	0	0	0	0	0	0	0	0	0.7664	0	0	0	0	0	0	1.2706	0	0.9132	0	0	0	0	0	0	0	0	1.5534	0	0	1.0852	0	0	0	0	0	0	0	0	0	0
AC007362.3	26.8924	84.3542	21.5591	26.6915	37.8902	16.1484	11.5269	9.3793	31.8823	21.5028	36.5706	27.3051	3.4134	6.5974	22.9234	8.9914	19.7808	6.8977	34.5865	6.3026	11.5032	7.069	13.1133	28.4816	15.2468	23.2272	24.6557	20.4093	13.1542	22.7333	9.9842	18.0711	15.3682	27.1332	15.6482	6.9903	8.9396	0.8912	7.5965	15.7268	8.9955	2.3371	43.1286	0.782	1.7462	7.9828	5.4562	9.9718	5.9282
AC007364.1	7.6835	2.9088	7.4988	3.3364	9.8234	3.7266	8.6452	3.1264	3.8645	0	10.8357	10.922	4.5512	15.8339	11.96	30.3461	15.8246	8.4305	26.4485	0.9004	9.4117	10.6036	5.62	14.7002	8.894	28.3888	12.7844	12.7558	11.51	9.7428	11.7995	13.3156	6.7236	4.7882	0	4.6602	4.9664	4.4558	11.3948	4.718	8.0959	0	6.5631	7.8198	5.2387	0	6.1382	16.8754	0
AC007365.1	1.2806	2.9088	0.9374	0	0	2.4844	0	5.2107	0.9661	1.7919	0	1.0922	1.1378	0	0.9967	0	0	0	0	0.9004	0	1.7673	0	0	2.5411	0	0	1.2756	0	1.0825	0	0	0	0	0	0.7767	0	0	0	0	0	0	0.9376	0.782	0	0.7983	0	0	0
AC007365.2	0	0	0	0	0	0	0	0	0	0	0	0	0	0	0	0	0	0	0	0	0	0	0	0	0	0	0	0	0	0	0	0	0	0	0	0	0	0	0	0	0	0	0	0	0	0	0	0	0
AC007365.3	16.6477	8.7263	9.3735	6.6729	9.8234	12.4219	2.8817	10.4215	7.729	10.7514	44.6975	15.2909	9.1024	9.2364	8.97	10.1154	13.1872	3.0656	11.1897	2.7011	8.366	7.9527	4.6833	9.1876	11.4351	14.1944	3.6527	5.1023	2.4664	3.2476	2.723	1.9022	3.8421	5.5862	7.8241	6.2136	1.9866	5.347	6.5113	1.5727	2.6986	6.2324	6.5631	4.6919	4.3656	14.3691	1.364	10.7389	5.9282
AC007365.4	2.5612	0	3.7494	2.2243	5.6134	8.6953	0	6.2529	4.8307	12.5433	2.7089	4.3688	4.5512	1.3195	4.9833	2.2479	5.2749	1.5328	2.0345	0.9004	2.0915	1.7673	0.9367	2.7563	1.2706	3.8712	1.8263	3.8267	1.6443	1.0825	2.723	1.9022	3.8421	5.5862	1.956	2.3301	0	4.4558	2.1704	0	4.4977	2.3371	0.9376	3.9099	1.7462	0.7983	2.0461	6.1365	0
AC007381.3	3.8418	29.0877	23.4338	0	1.4033	0	0	2.0843	0	3.5838	1.3545	7.6454	1.1378	1.3195	1.9933	2.2479	2.6374	0.7664	40.6899	7.203	0	5.3018	22.48	0	0	1.2904	6.3922	0	0.8221	3.2476	5.4459	1.9022	0	3.1921	1.956	10.8738	4.9664	0.8912	4.3409	4.718	2.6986	3.8952	4.6879	15.6396	0.8731	7.1846	2.7281	0.7671	0
AC007383.3	19.2088	43.6315	35.6194	48.9345	29.4701	26.0859	63.3978	29.1801	34.7807	51.965	37.9251	30.5817	55.7521	30.3482	34.8834	29.2222	35.6054	36.0212	32.552	54.923	48.1045	26.5089	31.8466	33.0755	12.7057	30.9696	31.9611	20.4093	28.7749	43.3015	29.045	20.9245	39.3811	22.345	39.1206	25.631	30.792	31.1907	21.7044	23.5902	32.3837	31.1619	34.6904	16.4216	27.0666	23.1502	26.5989	28.3813	118.565
AC007383.4	0	0	5.6241	0	0	0	0	0	0	34.0461	0	0	0	0	0	0	0	0	0	0	0	0	0	0	0	0	0	0	0	0	0	0	0	0	0	0	0	0	0	0	0	0	0	0	0	0	0	0	0
AC007383.6	1.2806	0	0	0	0	0	0	0	0	0	0	0	0	0	0	0	0	0	0	0	0	0	0	0	0	0	0	0	0	0	0	0	0	0	0	0	0	0	0	0	0	0	0	0	0	0	0	0.7671	0
AC007386.2	5.1224	0	5.6241	3.3364	2.8067	0	0	2.0843	1.9323	8.9595	5.4179	4.3688	3.4134	0	1.9933	2.2479	1.3187	2.2992	16.276	3.6015	0	0	0.9367	0	1.2706	5.1616	0.9132	0	1.6443	1.0825	0	1.9022	2.8815	2.3941	1.956	0.7767	0	0.8912	0.5426	0.7863	2.6986	3.1162	0	0.782	1.7462	1.5966	1.364	2.3012	17.7847
AC007386.3	2.5612	23.2701	5.6241	1.1121	2.8067	8.6953	0	4.1686	5.7968	5.3757	31.1528	7.6454	4.5512	7.9169	5.98	3.3718	5.2749	1.5328	7.1207	1.8008	5.2287	3.5345	7.4933	4.5938	3.8117	1.2904	3.6527	2.5512	4.1107	3.2476	4.5383	1.9022	1.921	3.1921	2.934	2.3301	1.9866	2.6735	1.6278	3.1454	3.5982	4.6743	5.6255	3.1279	4.3656	3.1931	2.0461	1.5341	0
AC007386.4	1.2806	8.7263	6.5615	4.4486	0	6.2109	2.8817	6.2529	1.9323	3.5838	9.4813	8.7376	1.1378	2.639	0.9967	2.2479	2.6374	4.5985	8.138	2.7011	4.183	3.5345	0.9367	1.8375	3.8117	2.5808	1.8263	2.5512	6.5771	1.0825	0	0.9511	2.8815	5.5862	5.8681	3.8835	1.9866	1.7823	4.3409	3.9317	0	4.6743	2.8127	1.564	1.7462	0	3.4101	0.7671	0
AC007387.2	0	0	0	0	0	0	0	0	0	0	0	0	0	0	0	0	0	0	0	0	1.0457	0	0	0	0	0	0	0	0	0	0	0	0	0	0	0	0	0	0	0	0	0	0	0	0	0	0	0	0
AC007389.1	1.2806	2.9088	4.6868	0	1.4033	1.2422	2.8817	3.1264	0.9661	3.5838	10.8357	2.1844	5.689	3.9585	0.9967	2.2479	2.6374	1.5328	3.0517	1.8008	0	7.069	0	4.5938	5.0823	2.5808	6.3922	6.3779	2.4664	1.0825	0.9077	1.9022	0.9605	2.3941	0	2.3301	0.9933	0	4.3409	1.5727	2.6986	0	3.7503	5.4739	0	1.5966	2.7281	2.3012	0
AC007389.2	0	2.9088	0	0	1.4033	0	0	0	1.9323	0	1.3545	2.1844	0	0	0	2.2479	0	0	2.0345	0	0	0.8836	0.9367	2.7563	0	1.2904	2.7395	3.8267	0	0	0	0	1.921	0	0	0	0	0	0.5426	0	5.3973	0.779	1.8752	0.782	0	0.7983	0.682	0.7671	0
AC007389.3	6.4029	11.6351	8.4362	7.785	8.42	4.9688	20.172	92.7511	6.7629	32.2542	5.4179	3.2766	5.689	7.9169	7.9733	2.2479	5.2749	9.9633	17.2932	23.4098	2.0915	8.8363	7.4933	8.2689	7.6234	7.7424	2.7395	3.8267	4.9328	5.4127	0.9077	9.5111	0.9605	3.1921	4.8901	1.5534	2.9799	6.2381	4.8835	1.5727	4.4977	1.5581	2.8127	6.2558	2.6193	7.1846	3.4101	3.0683	11.8565
AC007389.4	0	0	0	0	0	0	0	0	0	0	0	0	0	0	0	0	0	0	0	0	0	0	0	0	0	0	0	0	0	0	0	0	0	0	0	0	0	0	0	0	0	0	0	0	0	0	0	0	0
AC007390.4	0	0	0	0	0	0	0	0	0	0	0	0	0	0	0	0	0	0	0	0	0	0	0	0	0	0	0	0	0	0	0	0	0	0	0	0	0	0	0	0	0	0	0	0	0	0	0	0	0
AC007391.2	0	0	0	0	0	0	0	0	0.9661	0	0	0	0	0	0	0	1.3187	0	0	1.8008	0	0.8836	0	0	0	0	0	0	0	0	0	0	0	0	0	0.7767	0	0	0.5426	0.7863	0	0.779	1.8752	0	0	0	0.682	0	0
AC007392.3	5.1224	5.8175	0.9374	0	1.4033	7.4531	2.8817	0	0.9661	1.7919	10.8357	4.3688	2.2756	2.639	4.9833	5.6197	0	4.5985	2.0345	1.8008	1.0457	7.9527	4.6833	12.8627	3.8117	9.0328	3.6527	3.8267	0.8221	5.4127	1.8153	2.8533	5.7631	3.9902	0	2.3301	0.9933	2.6735	3.7983	3.9317	1.7991	0.779	0	0.782	2.6193	0.7983	6.1382	0	0
AC007392.4	3.8418	0	1.8747	1.1121	0	11.1797	0	1.0421	0	5.3757	1.3545	4.3688	2.2756	2.639	5.98	10.1154	3.9562	0	2.0345	3.6015	4.183	9.7199	5.62	13.7814	1.2706	11.6136	1.8263	3.8267	2.4664	1.0825	2.723	2.8533	2.8815	3.9902	0.978	3.1068	0.9933	0	1.0852	0.7863	0.8995	0	0	0	0	0	1.364	0	0
AC007394.3	0	0	0	0	0	0	0	1.0421	0	14.3352	1.3545	0	0	1.3195	0	0	0	1.5328	0	0	0	0	0	0.9188	0	0	0	1.2756	0	0	0	0	0	0.798	0	0	0.9933	0	0.5426	0	0	0	0	0.782	0	0	0	0	0
AC007395.3	0	0	0	0	0	0	0	0	0	0	0	0	0	0	0	0	0	0.7664	2.0345	0	0	0	0	0	0	0	0	0	0	0	0	0	0	0	0	0	0	0	0	0	0	0	0	0	0	0	0	0	0
AC007395.4	0	0	0	0	0	6.2109	0	1.0421	0.9661	0	2.7089	0	0	2.639	0	2.2479	6.5936	0	0	0	2.0915	0	0	0	0	0	0.9132	1.2756	1.6443	0	4.5383	1.9022	0.9605	0	1.956	0.7767	0	0	0	0	0.8995	0	0.9376	0	0	0	0	0	0
AC007402.1	0	0	0	0	0	0	0	0	0	0	0	0	0	0	0	0	0	0	0	0	0	0	0	0	0	0	0	0	0	0	0	0	0	0	0	0	0	0	0	0	0	0	0	0	0	0	0	0	0
AC007403.1	0	0	0	0	0	0	0	0	0	0	0	0	0	0	0	0	0	0	0	0	0	0	0	0	0	0	0	0	0	0	0	0	0	0	0	0	0	0	0	0	0	0	0	0	0	0	0	0	0
AC007403.2	1.2806	0	0.9374	1.1121	0	0	0	0	0	0	0	0	0	0	0.9967	0	0	0	1.0172	0	0	0	0	0.9188	1.2706	0	0	0	0.8221	1.0825	0	0	0	0	0	0.7767	0	0	0	0	0	0	0	0	0	0.7983	0	0	0
AC007403.3	0	0	0.9374	1.1121	0	0	0	0	0	0	0	0	0	0	0	2.2479	0	0	0	0	0	0	0	0.9188	1.2706	2.5808	0.9132	0	0	0	0	0	0	1.5961	0	0	0	0	1.0852	0	0	0	0	0.782	0	0	0	0	0
AC007405.4	1.2806	14.5438	2.8121	4.4486	1.4033	6.2109	5.7634	7.295	3.8645	12.5433	0	8.7376	3.4134	11.8754	15.9467	8.9914	6.5936	8.4305	5.0862	6.3026	2.0915	7.069	3.7467	5.5126	5.0823	12.904	4.5659	7.6535	4.9328	6.4952	5.4459	2.8533	0	0.798	3.9121	5.4369	4.9664	3.5647	3.7983	7.0771	2.6986	3.1162	6.5631	4.6919	2.6193	3.1931	6.8202	3.8353	0
AC007405.6	1.2806	0	5.6241	5.5607	1.4033	16.1484	23.0537	22.9272	4.8307	1.7919	10.8357	1.0922	5.689	9.2364	4.9833	12.3632	2.6374	6.1313	0	11.7049	5.2287	7.9527	0.9367	2.7563	2.5411	1.2904	0.9132	5.1023	3.2886	4.3302	4.5383	0.9511	0	11.9705	15.6482	4.6602	2.9799	6.2381	4.8835	3.1454	6.2968	8.5695	5.6255	9.3837	6.9849	4.7897	5.4562	16.1083	5.9282
AC007405.8	0	0	0	0	0	0	0	5.2107	0	0	0	1.0922	1.1378	2.639	0.9967	4.4957	0	8.4305	0	8.1034	0	0	1.8733	0.9188	0	0	0.9132	1.2756	0	0	0.9077	0.9511	0	0	0.978	0.7767	1.9866	0	1.6278	1.5727	0	0	0	0	0	2.3949	1.364	0.7671	17.7847
AC007422.1	0	0	0	0	0	1.2422	0	0	0	0	5.4179	0	0	0	0	0	0	0	0	0	0	0	0	0	0	1.2904	0	0	1.6443	0	0	0	0	0	0	0	0	0	0	0	0	0	0	0	0	0.7983	0	0	0
AC007435.1	0	0	0	0	0	0	0	0	0	0	0	0	0	0	0	0	0	0	0	0	0	0	0	0	0	0	0	0	0	0	0	0	0	0	0	0	0	0	0	0	0	0	0	0	0	0	0	0	0
AC007436.1	0	0	0	0	0	0	0	0	0	0	0	0	0	0	0	0	0	0	0	0	0	0	0	0	0	0	0	0	0.8221	0	0	0	0	0	0	0	0	0	0	0	0	0.779	0	0	0	0	0	0	0
AC007450.1	0	0	0	0	0	0	0	0	0	0	0	0	0	0	0	0	0	0	0	0	0	0	0	0	0	0	0	0	0	0	0	0	0	0	0	0	0	0	0	0	0	0	0	0	0	0	0	0	0
AC007461.2	1.2806	0	0	1.1121	2.8067	0	5.7634	2.0843	1.9323	0	4.0634	2.1844	11.378	10.5559	0.9967	4.4957	19.7808	10.7297	8.138	0	6.2745	2.6509	2.81	5.5126	1.2706	12.904	3.6527	10.2046	0	5.4127	3.6306	3.8044	0	0.798	2.934	3.8835	11.9195	9.8028	5.4261	14.1541	4.4977	0.779	3.7503	13.2936	1.7462	0	4.7742	2.3012	0
AC007463.2	0	0	0	0	1.4033	0	0	0	0	0	0	0	0	0	0	0	0	0	0	0	0	0	0	0	0	0	0	0	0	1.0825	0	0	0	0	0	0	0	0	0	1.5727	0	0	0	0	0	0	0	0.7671	0
AC007486.1	0	0	0	0	0	0	0	0	0	0	0	0	0	0	0	0	0	0	0	0	0	0	0	0	0	0	0	0	0	0	0	0	0	0	0	0	0	0	0	0	0	0	0	0	0	0	0	0	0
AC007528.1	0	0	0	0	0	0	0	0	0	0	0	0	0	0	0	0	0	0	0	0	0	0	0	0	0	0	0	0	0	0	0	0	0	0	0	0	0	0	0	0	0	0	0	0	0	0	0	0	0
AC007535.1	0	0	0	0	0	0	0	0	0	0	0	0	0	0	0	0	0	0	0	0	0	0	0	0	0	0	0	0	0	0	0	0	0	0	0	0	0	0	0	0	0	0	0	0	0	0	0	0	0
AC007551.1	0	0	0	0	0	0	0	0	0	0	0	0	0	0	0	0	0	0	0	0	0	0	0	0	0	0	0	0	0	0	0	0	0	0	0	0	0	0	0	0	0	0	0	0	0	0	0	0	0
AC007551.2	2.5612	0	0	0	0	0	0	0	3.8645	0	0	4.3688	0	0	1.9933	0	1.3187	0	0	0	0	0	0	0.9188	1.2706	1.2904	1.8263	0	0.8221	1.0825	0	0	0	0	0	0.7767	2.9799	1.7823	0.5426	0	0	0	1.8752	0	0	0	0.682	0	0
AC007556.3	0	0	0	0	0	0	0	1.0421	0	0	0	1.0922	0	0	0	0	0	0	0	0	0	0	1.8733	0	0	0	0	0	0	0	0	0	0	0	0	0	0	0	0	0	0	0	0	0	0	0	0	0	0
AC007557.1	0	5.8175	4.6868	0	0	0	0	0	0	0	0	4.3688	0	0	0	0	0	0	4.069	0	0	0	0	0	0	0	0	0	0	0	0	0	0.9605	0	0	0	0	0	0	0	0	0	0	0	0	0	0.682	0.7671	0
AC007557.2	0	5.8175	17.8097	0	0	2.4844	0	0	0	0	0	0	0	0	0	0	0	0	8.138	0.9004	0	0	0	0.9188	0	0	0	0	0	0	0	0	1.921	0	0	0	0	0	0	0	0	0	0	0	0	0	0	0.7671	0
AC007557.3	0	8.7263	23.4338	0	0	4.9688	0	0	0	0	0	1.0922	0	0	1.9933	1.1239	0	0	5.0862	0	1.0457	0	0	0.9188	0	0	0.9132	1.2756	0	0	0	0	2.8815	0.798	0.978	0	0.9933	0	0	0	0	0	0	0	0	0	1.364	0.7671	0
AC007557.4	0	23.2701	33.7446	0	0	2.4844	0	0	0	0	1.3545	2.1844	0	1.3195	1.9933	0	0	0	15.2587	0	0	0	0	0	0	0	0	3.8267	0	1.0825	0.9077	0	0	0	0.978	0.7767	0	0	0	0	0.8995	0	0	0	0	0	0.682	1.5341	0
AC007559.1	0	11.6351	0.9374	0	1.4033	0	0	4.1686	0.9661	7.1676	0	31.6739	0	0	2.99	2.2479	0	0.7664	2.0345	0.9004	0	0.8836	5.62	0	0	1.2904	3.6527	0	0	1.0825	0	0	0	1.5961	0	0	1.9866	0	2.1704	3.1454	0	0	9.3758	0	0.8731	0	0	0.7671	0
AC007560.1	0	2.9088	2.8121	1.1121	0	1.2422	0	4.1686	0.9661	5.3757	2.7089	4.3688	3.4134	3.9585	0.9967	3.3718	0	1.5328	0	0.9004	3.1372	2.6509	0	0.9188	1.2706	1.2904	0	1.2756	1.6443	1.0825	0	0	0	0.798	0.978	0.7767	0	0.8912	1.0852	0	1.7991	2.3371	5.6255	1.564	0	1.5966	0.682	0.7671	0
AC007560.2	0	0	0	0	0	0	0	0	0	0	0	0	0	0	0	0	0	0	0	0	0	0	0	0	0	0	0	0	0	0	0	0	0	0	0	0	0	0	0	0	0	0	0	0	0	0	0	0	0
AC007562.1	0	0	0	0	0	0	0	0	0	0	0	0	0	0	0	0	0	0	0	0	0	0	0	0	0	0	0	0	0	0	0	0	0	0	0	0	0	0	0	0	0	0	0	0	0	0	0	0	0
AC007563.1	6.4029	63.9928	224.027	0	2.8067	29.8125	0	0	1.9323	0	1.3545	2.1844	1.1378	0	4.9833	3.3718	0	0	80.3626	6.3026	5.2287	3.5345	0.9367	5.5126	2.5411	0	5.479	19.1337	0	14.073	0.9077	2.8533	12.4867	1.5961	8.8021	0.7767	23.839	0	2.713	4.718	6.2968	1.5581	4.6879	0.782	2.6193	2.3949	7.5023	15.3413	0
AC007563.3	0	0	0	0	0	1.2422	0	0	0	0	0	0	0	1.3195	0	0	0	0	0	0	0	0.8836	0.9367	0	1.2706	0	0	2.5512	0	1.0825	0.9077	0	0.9605	0	0.978	0.7767	1.9866	0	0.5426	0	0.8995	0	0	0	0	0	0	0	0
AC007563.4	0	0	0	0	0	0	0	0	0	0	0	0	0	0	0	0	0	0	0	0	0	0.8836	0	0.9188	0	0	0	1.2756	0.8221	0	0	0	0	0	0	0	0	0	0	0	0	0	0.9376	0	0	0	0	0	0
AC007563.5	0	5.8175	12.1856	0	0	0	0	0	0	0	0	0	0	0	0	0	0	0	2.0345	0	0	0.8836	0	0	0	0	0	0	0	1.0825	0	0	1.921	0	0	0	0	0	1.6278	0.7863	0	0	0	0	0	2.3949	0.682	0	0
AC007566.10	2.5612	0	11.2482	11.1215	18.2434	31.0547	20.172	8.3372	14.492	16.1271	10.8357	6.5532	15.9292	9.2364	21.9267	11.2393	19.7808	12.2625	10.1725	8.1034	16.732	1.7673	10.3033	28.4816	30.4936	45.164	23.7425	17.8581	16.4428	16.2381	3.6306	9.5111	13.4472	15.1627	9.7801	21.7475	8.9396	8.9116	25.5026	18.0859	9.895	10.1276	11.251	15.6396	13.9699	16.764	12.2764	21.4778	0
AC007567.1	0	0	0	0	0	0	0	0	0	0	0	0	0	0	0	1.1239	0	0	0	0	0	0	0	0	0	0	0	0	0	0	0	0	0	0	0	0	0	0.8912	0	0	0	0	0.9376	0	0	0	0	0	0
AC007568.1	0	0	0	0	0	0	0	0	0	0	0	0	0	0	0	0	0	0	0	0	0	0	0	0	0	0	0	0	0	0	0	0	0	0	0	0	0	0	0	0	0	0	0	0	0	0	0	0	0
AC007611.1	0	0	0	0	0	0	0	0	0	0	0	0	0	0	0	0	0	0	0	0	0	0	0	0	0	0	0	0	0	0	0	0	0	0	0	0	0	0	0	0	0	0	0	0	0	0	0	0	0
AC007618.3	5.1224	2.9088	2.8121	1.1121	0	1.2422	0	3.1264	6.7629	0	8.1268	2.1844	1.1378	3.9585	2.99	5.6197	6.5936	0	6.1035	1.8008	3.1372	1.7673	1.8733	6.4313	2.5411	6.452	0.9132	2.5512	0.8221	2.1651	3.6306	2.8533	2.8815	4.7882	3.9121	2.3301	0.9933	0	5.4261	0.7863	3.5982	0.779	0	0	0.8731	7.9828	0.682	0	0
AC007620.3	99.886	49.449	42.1808	96.7568	26.6635	24.8438	72.0429	72.9503	29.95	91.3868	51.4698	75.3621	20.4804	63.3354	26.9101	33.7179	55.3862	45.9845	46.7934	49.5207	36.6012	47.7161	64.6299	97.3888	36.8465	86.4567	31.0479	5.1023	35.352	11.9079	40.8445	26.6311	18.2498	28.7293	22.4943	20.9708	30.792	14.2586	45.5791	7.0771	52.1737	27.2666	19.6892	14.0756	27.9397	119.743	21.8248	2.3012	165.99
AC007631.1	0	0	0	0	0	0	0	0	0	0	0	0	0	0	0	0	0	0	0	0	0	0	0	0	0	0	0	0	0	0	0	0	0	0	0	0	0	0	0	0	0	0	0	0	0	0	0	0	0
AC007652.1	0	0	0	0	0	0	0	0	0	0	0	0	0	0	0	0	0	0	0	0	0	0	0	0	0	0	0	0	0	0	0	0	0	0	0	0	0	0	0	0	0	0	0	0	0	0	0	0	0
AC007677.2	1.2806	0	1.8747	0	0	1.2422	0	0	0	1.7919	1.3545	3.2766	0	2.639	1.9933	0	1.3187	1.5328	0	0	1.0457	0	1.8733	1.8375	0	1.2904	0.9132	3.8267	0	1.0825	0	0.9511	3.8421	0	0.978	0.7767	0	0	0	1.5727	0	0	0.9376	0	0	0	0	0	0
AC007679.1	0	0	0.9374	0	0	1.2422	0	0	0	0	0	0	0	0	0	0	0	0	0	0	0	0	0	0	0	0	0	0	0	0	0	0	0	0	0	0	0	0	0	0	0	0	0	0	0	0	0	0	0
AC007679.3	6.4029	31.9964	5.6241	0	8.42	3.7266	8.6452	0	0	8.9595	6.7723	0	0	13.1949	0	0	0	0	0	0	3.1372	0	0	0	0	0	0	0	0	0	0	0	0	6.3843	0	0	0	0.8912	2.1704	0	0	0	0	2.3459	0	2.3949	0	0	0
AC007679.4	10.2447	5.8175	0.9374	3.3364	5.6134	6.2109	2.8817	4.1686	2.8984	5.3757	4.0634	7.6454	9.1024	6.5974	5.98	10.1154	17.1434	3.832	9.1552	1.8008	6.2745	2.6509	7.4933	2.7563	11.4351	15.4848	5.479	2.5512	3.2886	4.3302	14.5225	15.2178	0	4.7882	1.956	2.3301	19.8658	1.7823	2.1704	2.359	2.6986	1.5581	8.4382	3.1279	5.2387	1.5966	0.682	3.0683	0
AC007682.1	0	0	0	0	0	0	0	0	0.9661	0	1.3545	0	0	1.3195	0	0	0	0	0	1.8008	0	0	0	0	0	0	0.9132	0	0	0	0	0	0	0	0	0	0	0	0	0	0	0	0	0	0	0	0	0	0
AC007682.2	0	0	0	0	0	0	0	0	0	0	0	0	0	0	0	0	0	0	0	0	0	0	0	0	0	0	0	0	0	0	0	0	0	0	0	0	0	0	0	0	0	0	0	0	0	0	0	0	0
AC007731.1	0	0	0	0	0	0	0	0	0	0	0	0	0	0	0	0	0	0	0	0	0	0	0	0	0	0	0	0	0	0	0	0	0	0	0	0	0	0	0	0	0	0	0	0	0	0	0	0	0
AC007740.1	1.2806	0	1.8747	0	0	1.2422	0	0	10.6274	0	0	0	0	0	0.9967	4.4957	0	0	0	0	0	4.4182	1.8733	1.8375	0	20.6464	4.5659	6.3779	0	0	2.723	0	0	0	0	0.7767	0	0	0.5426	0.7863	0	1.5581	0	3.9099	0.8731	0	1.364	0	0
AC007742.3	0	0	0	0	0	0	0	0	0	0	0	0	0	0	0	0	0	0	0	0	0	0	0	0	0	0	0	0	0	0	0	0	0	0	0	0	0	0	1.0852	0	0	0	0	0	0	0	0	0	0
AC007743.1	23.0506	8.7263	35.6194	26.6915	28.0668	40.9922	5.7634	26.0537	51.2049	10.7514	25.7349	37.1349	20.4804	17.1533	32.8901	13.4872	13.1872	15.3282	15.2587	34.2143	18.8235	35.3452	17.7966	45.9381	45.7404	58.0679	17.3503	28.0627	13.1542	19.4857	29.045	22.8267	9.6052	23.941	22.4943	16.3106	21.8524	7.1293	19.5339	18.0859	60.2697	20.2552	21.5643	12.5117	13.0967	15.1674	19.0967	21.4778	17.7847
AC007750.5	103.728	0	0.9374	18.9065	18.2434	1.2422	0	18.7586	19.3226	5.3757	55.5332	3.2766	2.2756	15.8339	8.97	4.4957	10.5498	0.7664	12.207	0.9004	1.0457	7.9527	24.3533	8.2689	8.894	1.2904	1.8263	5.1023	21.3757	4.3302	14.5225	3.8044	3.8421	12.7686	1.956	10.0971	5.9597	0	10.3096	6.2907	8.0959	21.0343	0.9376	1.564	1.7462	14.3691	6.8202	3.0683	0
AC007773.1	0	0	0	0	0	0	0	0	0	0	0	0	0	0	0	0	0	0.7664	1.0172	0	0	0	0	0	0	0	0	0	0	0	0	0	0	0	0	0	0	0	0	0	0	0	0	0	0	0	0	0	0
AC007773.2	2.5612	5.8175	11.2482	2.2243	4.21	9.9375	14.4086	10.4215	4.8307	19.7109	4.0634	7.6454	7.9646	9.2364	11.96	6.7436	6.5936	7.6641	5.0862	18.0075	5.2287	5.3018	9.3667	2.7563	13.9762	9.0328	2.7395	8.929	10.6878	5.4127	0	9.5111	3.8421	5.5862	2.934	10.0971	9.9329	10.694	7.5965	8.6498	3.5982	3.1162	4.6879	6.2558	3.4925	3.9914	8.8663	1.5341	71.1388
AC007787.2	38.4177	23.2701	13.1229	12.2336	19.6468	19.875	17.2903	3.1264	16.4242	16.1271	14.8992	28.3973	7.9646	47.5016	10.9634	22.4786	26.3744	9.9633	19.3277	11.7049	2.0915	10.6036	10.3033	16.5377	24.1408	10.3232	7.3054	12.7558	6.5771	10.8254	11.7995	9.5111	12.4867	8.7784	4.8901	4.6602	17.8792	2.6735	24.4174	2.359	13.4932	11.6857	5.6255	3.9099	1.7462	25.5451	3.4101	7.6706	29.6412
AC007790.4	55.0654	75.6279	22.4964	16.6822	5.6134	44.7188	8.6452	19.8008	15.4581	23.2947	78.5592	34.9505	36.4095	29.0287	21.9267	28.0983	75.167	18.3938	24.414	10.8045	25.098	22.0908	33.72	34.913	35.5759	47.7448	33.7875	26.7871	20.5535	23.8158	31.7679	29.4845	16.3288	17.5568	21.5163	18.6407	25.8255	11.5851	13.5652	23.5902	26.0869	24.1504	21.5643	21.8954	13.0967	5.588	10.2304	14.5742	0
AC007792.1	2.5612	23.2701	1.8747	0	4.21	1.2422	0	1.0421	0	0	0	0	0	1.3195	0.9967	3.3718	0	0	0	0	1.0457	0	0.9367	0.9188	0	0	2.7395	0	1.6443	0	0	0.9511	0	0.798	1.956	0	0	0.8912	0.5426	1.5727	0.8995	0.779	0	0	0.8731	0	1.364	2.3012	0
AC007795.1	0	0	0	0	0	0	0	0	0	0	0	0	0	0	0	0	0	0	0	0	0	0	0	0	0	0	0	0	0	0	0	0	0	0	0	0	0	0	0	0	0	0	0	0	0	0	0	0	0
AC007796.1	0	0	0	0	2.8067	0	0	1.0421	0	0	1.3545	0	1.1378	0	2.99	0	0	0	1.0172	0	0	2.6509	1.8733	1.8375	0	0	0	1.2756	0	3.2476	0.9077	0	1.921	0	0	0	0	0	0	1.5727	0	0	2.8127	0	0	0	0.682	0	0
AC007842.1	0	0	0	0	0	0	0	0	0	0	0	0	0	0	0	0	0	0	0	0	0	0	0	0	0	0	0	0	0	0	0	0	0	0	0	0	0	0	0	0	0	0	0	0	0	0	0	0	0
AC007875.2	3.8418	23.2701	9.3735	2.2243	4.21	7.4531	2.8817	0	0	7.1676	1.3545	7.6454	6.8268	10.5559	11.96	11.2393	1.3187	3.832	7.1207	1.8008	7.3202	7.069	1.8733	4.5938	1.2706	9.0328	2.7395	1.2756	4.9328	3.2476	8.1689	1.9022	4.8026	2.3941	4.8901	1.5534	2.9799	0	2.713	3.1454	3.5982	3.8952	2.8127	9.3837	1.7462	1.5966	2.0461	3.0683	0
AC007879.1	0	0	0	0	0	0	0	0	0	0	0	0	0	0	0	0	0	0	0	0	0	0	0	0	0	0	0	0	0	0	0	0	0	0	0	0	0	0	0	0	0	0	0	0	0	0	0	0	0
AC007879.2	6.4029	0	1.8747	0	0	1.2422	0	1.0421	0.9661	1.7919	6.7723	3.2766	1.1378	6.5974	0	1.1239	0	0	2.0345	0	0	1.7673	0.9367	2.7563	1.2706	1.2904	0	0	0	1.0825	1.8153	1.9022	0	0	1.956	1.5534	0.9933	0	0	0	0.8995	0.779	0	0	0	0	2.0461	0.7671	0
AC007879.3	0	0	0	2.2243	0	0	0	0	0	0	0	0	0	0	0	0	0	0	0	0	0	0	0	0	0	0	0	0	0	0	0	0.9511	0	0	0	0	0.9933	0	0	0	0	0	0	0	0.8731	0.7983	0.682	0	0
AC007879.4	0	0	0.9374	0	2.8067	1.2422	0	0	0	0	0	2.1844	1.1378	0	0.9967	0	1.3187	0.7664	2.0345	4.5019	0	0	1.8733	0.9188	0	1.2904	0	0	0	0	0.9077	0	0	0	0	0	0	0.8912	0.5426	0	0	0	0	3.1279	0	0.7983	0	0.7671	0
AC007879.5	0	0	0.9374	2.2243	2.8067	3.7266	0	1.0421	0.9661	0	0	1.0922	1.1378	0	0.9967	0	1.3187	2.2992	4.069	0.9004	4.183	0.8836	5.62	3.6751	5.0823	5.1616	0.9132	5.1023	0.8221	0	2.723	0.9511	5.7631	0	0	0	0	0	0	1.5727	0	0.779	0	10.9477	0	1.5966	1.364	0.7671	0
AC007879.6	0	0	0	0	0	0	0	0	0	1.7919	0	0	0	0	0	3.3718	0	0	0	0	1.0457	0	0	0	0	1.2904	0	1.2756	0	0	0	2.8533	0	0	0	0	0	0	1.6278	1.5727	0	0.779	0	1.564	0	0	0	0	0
AC007879.7	6.4029	0	2.8121	0	1.4033	0	0	1.0421	3.8645	3.5838	5.4179	4.3688	0	9.2364	4.9833	2.2479	0	0	1.0172	0	2.0915	0.8836	4.6833	2.7563	0	6.452	0.9132	0	5.755	3.2476	2.723	3.8044	0	1.5961	3.9121	3.8835	0.9933	1.7823	2.1704	0	1.7991	3.1162	0	3.9099	0	0	2.0461	0	0
AC007880.1	1.2806	0	9.3735	1.1121	2.8067	1.2422	0	2.0843	0.9661	1.7919	0	3.2766	0	1.3195	0	0	1.3187	0	12.207	0	0	0	0.9367	1.8375	0	0	1.8263	2.5512	0.8221	1.0825	0	0	0.9605	1.5961	0	1.5534	0	0	0	0.7863	0.8995	1.5581	0	0.782	1.7462	0.7983	0	1.5341	0
AC007881.1	0	0	0	0	0	0	0	0	0	0	0	0	0	0	0	0	0	0	0	0	0	0	0	0	0	0	0	0	0	0	0	0	0	0	0	0	0	0	0	0	0	0	0	0	0	0	0	0	0
AC007881.4	0	0	0	2.2243	0	2.4844	0	9.3793	0.9661	3.5838	6.7723	0	0	5.278	0	5.6197	0	0	0	0	0	0	0	0	0	0	0	0	1.6443	0	0	0	0	0	0	0	0	0	0	0.7863	0	0	0.9376	0	0	0	0	0	0
AC007899.3	25.6118	8.7263	3.7494	14.4579	8.42	19.875	0	10.4215	20.2887	19.7109	20.317	6.5532	6.8268	0	17.94	30.3461	25.0557	13.7954	5.0862	9.0038	9.4117	15.0217	5.62	8.2689	17.7879	16.7752	10.9581	8.929	3.2886	11.9079	17.2455	14.2667	15.3682	6.3843	4.8901	10.0971	6.953	11.5851	10.3096	11.7951	8.9955	12.4647	6.5631	7.0378	15.7161	7.9828	8.1843	20.7107	5.9282
AC007919.1	0	0	0	0	0	0	0	0	0	0	0	0	0	0	0	0	0	0	0	0	0	0	0	0	0	0	0	0	0	0	0	0	0	0	0	0	0	0	0	0	0	0	0	0	0	0	0	0	0
AC007919.18	3.8418	2.9088	6.5615	5.5607	4.21	1.2422	5.7634	0	0	0	5.4179	1.0922	1.1378	1.3195	2.99	11.2393	13.1872	8.4305	17.2932	0	7.3202	1.7673	1.8733	5.5126	0	16.7752	6.3922	3.8267	6.5771	2.1651	0	0	0	0.798	0	0.7767	3.9732	0	7.5965	0	0	0.779	7.5006	0.782	0	0.7983	4.7742	3.8353	0
AC007919.19	37.1371	46.5402	19.6844	18.9065	12.6301	8.6953	8.6452	8.3372	16.4242	7.1676	8.1268	7.6454	18.2048	19.7923	15.9467	20.2307	29.0118	11.4961	12.207	3.6015	9.4117	14.1381	17.7966	8.2689	7.6234	24.5176	10.9581	6.3779	10.6878	7.5778	15.4301	7.6089	0	0.798	6.8461	4.6602	10.9262	5.347	13.0226	4.718	3.5982	5.4533	10.3134	3.9099	3.4925	7.9828	15.6865	6.9036	0
AC007948.1	0	0	0	0	0	0	0	0	0	0	0	0	0	0	0	0	0	0	0	0	0	0	0	0	0	0	0	0	0	0	0	0	0	0	0	0	0	0	0	0	0	0	0	0	0	0	0	0	0
AC007950.1	0	0	0	0	0	0	0	0	0	0	0	0	0	0	0	0	0	0	0	0	0	0	1.8733	0	0	0	0	0	0	0	0	0	0	0	0	0	0	0	0	0	0	0	0	0	0	0	0	0	0
AC007950.2	10.2447	46.5402	11.2482	12.2336	16.8401	29.8125	31.6989	4.1686	3.8645	30.4623	8.1268	9.8298	15.9292	14.5144	17.94	12.3632	14.5059	16.861	10.1725	8.1034	11.5032	8.8363	5.62	15.619	7.6234	12.904	6.3922	12.7558	2.4664	14.073	5.4459	8.56	3.8421	7.9803	6.8461	18.6407	6.953	5.347	8.6817	2.359	8.9955	17.139	5.6255	7.0378	8.7312	3.9914	4.0921	6.1365	0
AC007952.4	0	0	1.8747	1.1121	0	0	0	0	0	0	0	2.1844	0	0	0	3.3718	0	0	0	0	0	0	0	0.9188	0	0	0	0	0.8221	0	0	0	0	0	0	0	0.9933	0	0	0	0	0	0	0	0	0	0.682	0	0
AC007952.5	106.289	40.7227	58.1158	195.738	155.771	170.18	60.5161	177.165	159.411	125.433	43.343	209.703	38.6851	141.185	144.517	104.525	102.86	68.2103	135.294	201.684	23.0065	161.704	121.766	150.677	63.5284	65.8103	5.479	85.4637	77.2812	101.759	91.6732	102.72	21.1313	77.4094	37.1645	37.2815	12.9128	32.0819	4.8835	60.5483	75.562	77.9046	24.3771	37.535	19.2086	85.4164	48.4237	13.0401	35.5694
AC007952.6	11.5253	2.9088	4.6868	27.8037	5.6134	23.6016	11.5269	14.5901	10.6274	19.7109	2.7089	20.7519	0	7.9169	11.96	6.7436	1.3187	1.5328	10.1725	25.2106	6.2745	18.5562	4.6833	15.619	12.7057	0	0.9132	6.3779	8.2214	4.3302	4.5383	12.3645	4.8026	7.9803	2.934	4.6602	0.9933	5.347	1.6278	5.5044	9.895	9.3486	3.7503	2.3459	1.7462	11.176	8.8663	3.0683	5.9282
AC007966.1	5.1224	0	1.8747	1.1121	1.4033	4.9688	2.8817	0	3.8645	0	0	0	9.1024	3.9585	1.9933	0	1.3187	7.6641	4.069	7.203	0	0.8836	2.81	5.5126	1.2706	1.2904	17.3503	1.2756	0.8221	3.2476	0.9077	0.9511	1.921	1.5961	3.9121	3.1068	1.9866	1.7823	1.6278	1.5727	0	0	0.9376	2.3459	0.8731	0.7983	2.0461	0.7671	0
AC007967.2	0	0	0	0	0	0	0	0	0	0	0	0	0	0	0	0	0	0.7664	0	0	0	0	0	0	0	0	0	0	0	0	0	0	0	0	0	0	0	0	0	0	0	0	0	0	0	0	0	0	0
AC007967.3	0	0	0	0	0	0	0	0	0	0	0	0	0	0	0	0	0	0	0	0	0	0	0	0	0	0	0	0	0	0	0	0	0	0	0	0	0	0	0	0	0	0	0	0	0	0	0	0	0
AC007967.4	0	0	0	0	0	0	0	0	0	0	0	0	0	0	0	0	0	0	0	0	0	0	0	0	0	0	0	0	0	0	0	0	0	0	0	0	0	0	0	0	0	0	0	0	0	0	0	0	0
AC007969.4	0	0	0	0	0	0	0	0	0.9661	0	0	0	0	0	0	0	0	0	0	0	0	0	0	0	0	0	0	0	0	0	0	0	0	0	0	0	0	0	0	0	0	0	0	0	0	0	0	0	0
AC007969.5	19.2088	29.0877	66.5519	52.2709	54.7303	36.0235	77.8064	78.161	28.9839	43.0055	46.0519	29.4895	59.1655	19.7923	27.9067	34.8418	10.5498	51.3494	38.6554	27.0113	26.1437	56.5524	35.5933	22.9691	16.5174	14.1944	44.7456	25.5116	31.2413	41.1364	28.1373	31.3867	43.2232	46.286	46.9447	40.3882	23.839	48.1229	31.4713	38.5307	32.3837	24.1504	37.5032	33.6251	38.4171	39.1159	32.0551	93.5817	11.8565
AC008045.1	0	0	0	0	0	0	0	0	0	0	0	0	0	0	0	0	0	0	0	0	0	0	0	0	0	0	0	0	0	0	0	0	0	0	0	0	0	0	0	0	0	0	0	0	0	0	0	0	0
AC008060.5	0	0	0	0	0	0	0	0	0	0	0	0	0	0	0	0	0	0	0	0	0	0	0	0	0	0	0	0	0	0	0	0	0	0	0	0	0	0	0	0	0	0	0	0	0	0	0	0	0
AC008060.7	0	0	0	0	1.4033	0	0	2.0843	0.9661	0	0	0	0	0	0	0	0	0	0	0.9004	0	0	0	0.9188	0	0	0	0	0	0	0	0	0	0	0	0	0	0	0	0	0	0	3.7503	1.564	0	0	0	0.7671	0
AC008060.8	0	0	0	0	0	0	0	0	0	0	0	0	0	0	0	0	0	0	0	0	0	0	0	0	0	0	0	0	0	0	0	0	0	0	0	0	0	0	0	0	0	0	0	0	0	0	0	0	0
AC008063.2	3.8418	0	0	2.2243	0	1.2422	0	0	0	3.5838	5.4179	5.461	0	3.9585	0	0	6.5936	0.7664	0	1.8008	0	0.8836	0	0	2.5411	2.5808	0	0	4.9328	0	0	2.8533	0	2.3941	0	0	0	0.8912	0.5426	0	0.8995	0	0	0	0	0	0	1.5341	0
AC008063.3	0	0	0	0	0	0	0	1.0421	0	0	0	0	0	0	0	0	0	0	0	0	0	0	0	0	0	0	0	0	0	0	0	0	0	0	0	0	0	0	0	0	0	0	0	0	0	1.5966	0	0	0
AC008065.1	5.1224	0	0.9374	7.785	8.42	4.9688	0	4.1686	3.8645	0	5.4179	4.3688	2.2756	1.3195	2.99	1.1239	7.9123	2.2992	5.0862	1.8008	4.183	1.7673	0	5.5126	6.3528	0	5.479	2.5512	3.2886	1.0825	4.5383	1.9022	3.8421	2.3941	0.978	3.1068	0	0.8912	2.713	2.359	3.5982	2.3371	0.9376	2.3459	0	0	2.0461	0.7671	0
AC008067.2	0	0	0	0	1.4033	0	0	0	0.9661	0	1.3545	1.0922	0	0	0.9967	0	0	0	0	0.9004	0	0	0	0	0	0	0	0	0	0	0	0	0	0	0	0	0.9933	0	0	0	0	0	0	0	0	0	0	0	0
AC008069.1	0	0	0	0	0	0	0	0	0	1.7919	0	0	0	0	0	0	0	0	0	0	3.1372	0	0	0	0	0	0	0	0	0	0	0	0	0.798	0.978	0	0	0	0	0	0	0	0	0	0	0	0	2.3012	0
AC008069.2	0	0	0	0	0	0	0	0	0	0	0	0	0	0	0	0	0	0	0	0	0	0	0	0	0	0	0	0	0	0	0	0	0	0	0	0	0	0	1.0852	0	0	0	0	0	0	0	0	0	0
AC008072.1	0	0	0	0	0	0	0	0	0	3.5838	0	1.0922	0	0	0	0	0	0.7664	0	0	0	0	0	0	0	0	0	0	0	0	0	0	0	0	0	0	0	0	0	0	0	0	0.9376	0	0	0	0	0	0
AC008073.7	3.8418	11.6351	0.9374	2.2243	0	8.6953	0	2.0843	0.9661	3.5838	1.3545	3.2766	2.2756	1.3195	1.9933	2.2479	6.5936	4.5985	3.0517	2.7011	0	0	2.81	3.6751	1.2706	2.5808	0	1.2756	0.8221	2.1651	0	1.9022	2.8815	3.9902	8.8021	0.7767	0.9933	0.8912	1.6278	0	2.6986	0.779	4.6879	3.9099	0	0.7983	1.364	0.7671	0
AC008073.9	2.5612	5.8175	0	1.1121	2.8067	3.7266	5.7634	0	0.9661	7.1676	1.3545	2.1844	0	0	0	1.1239	5.2749	0	5.0862	0	0	0	0	4.5938	0	2.5808	1.8263	0	0.8221	0	0	0	0	1.5961	0.978	0	0	0	1.6278	0.7863	0	0	1.8752	2.3459	0	0.7983	2.7281	1.5341	0
AC008074.3	1.2806	20.3614	12.1856	11.1215	8.42	11.1797	0	3.1264	3.8645	17.919	14.8992	10.922	7.9646	3.9585	2.99	15.735	11.8685	12.2625	6.1035	9.9041	5.2287	7.069	8.43	4.5938	8.894	5.1616	2.7395	2.5512	5.755	6.4952	8.1689	1.9022	1.921	9.5764	2.934	9.3204	5.9597	12.4763	1.6278	0.7863	4.4977	2.3371	5.6255	4.6919	2.6193	3.1931	10.2304	3.8353	17.7847
AC008074.4	0	0	0	0	0	0	0	1.0421	0	0	0	1.0922	0	0	0	1.1239	0	0	0	1.8008	0	0	0	0	0	0	0	0	0	0	0	0	0	0	0	0	0	0	0	0	0	0	0	0	0	0	0	0	0
AC008074.5	6.4029	23.2701	6.5615	10.0093	9.8234	12.4219	2.8817	7.295	5.7968	12.5433	8.1268	10.922	5.689	3.9585	6.9767	5.6197	7.9123	8.4305	20.345	3.6015	5.2287	3.5345	9.3667	3.6751	7.6234	5.1616	0.9132	3.8267	2.4664	4.3302	2.723	1.9022	4.8026	3.9902	0.978	5.4369	9.9329	5.347	2.713	7.0771	4.4977	0.779	5.6255	1.564	7.858	4.7897	4.0921	2.3012	0
AC008079.10	120.375	567.209	225.902	117.888	168.401	295.641	129.677	1288.09	128.495	3266.63	94.8128	581.053	168.394	150.422	156.477	165.218	189.896	144.085	267.536	569.038	138.039	106.036	101.16	200.29	200.75	184.527	108.668	144.14	60.8384	94.1808	94.3962	95.1112	496.586	294.475	193.647	124.272	227.463	137.239	79.7635	246.911	110.644	177.623	310.339	117.297	594.592	89.4078	130.949	262.336	154.134
AC008079.9	0	0	0	0	0	0	0	2.0843	0	0	0	3.2766	0	0	0	0	0	0	0	0	0	0	0	0	0	0	0	0	0	0	0	0	0	0	0	0	0	0	0	0	0	0	0	0	0	0	0	0	0
AC008085.1	0	0	0	0	0	0	0	0	0	0	0	0	0	0	0	0	0	0	0	0	0	0	0	0	0	0	0	0	0	0	0	0	0	0	0	0	0	0	0	0	0	0	0	0	0	0	0	0	0
AC008088.4	1.2806	0	0	1.1121	2.8067	1.2422	0	19.8008	2.8984	0	16.2536	0	1.1378	0	0.9967	0	1.3187	0.7664	1.0172	0	0	2.6509	0	5.5126	0	6.452	0.9132	6.3779	7.3993	1.0825	0.9077	2.8533	1.921	2.3941	2.934	5.4369	0	0.8912	1.6278	3.1454	0	2.3371	0	1.564	0.8731	0.7983	0.682	8.4377	0
AC008103.3	0	0	0	0	0	0	0	0	0	0	0	0	0	0	0	0	0	0	0	0	0	0	0	0	0	0	0	0	0	0	0	0	0	0	0	0	0	0	0	0	0	0	0	0	0	0	0	0	0
AC008103.4	0	0	0.9374	0	0	0	0	5.2107	0	8.9595	0	10.922	0	0	0	0	0	0	0	0	0	0	0	0	0	0	0	0	0	0	0	0	5.7631	0.798	0	0	0	0	0	0.7863	0	0	0	0	0	0	0	0.7671	0
AC008132.13	15.3671	151.256	7.4988	1.1121	5.6134	9.9375	8.6452	5.2107	3.8645	10.7514	6.7723	5.461	3.4134	3.9585	2.99	3.3718	2.6374	3.832	49.8452	28.8121	4.183	11.4872	1.8733	9.1876	0	5.1616	0	1.2756	2.4664	3.2476	0	0.9511	59.5519	3.9902	0	3.1068	12.9128	0.8912	5.4261	2.359	0	4.6743	10.3134	3.9099	0.8731	7.1846	17.7326	2.3012	0
AC008132.14	0	0	0	0	0	0	0	0	0	0	2.7089	0	3.4134	5.278	0	0	0	0	0	17.1072	0	10.6036	7.4933	0	0	0	0	0	0	0	0	0	0	0	0	0	0	5.347	8.1391	6.2907	5.3973	0	0	0	0	0	0	0	0
AC008132.15	0	0	1.8747	0	0	0	0	6.2529	0	8.9595	0	1.0922	0	0	0	1.1239	0	0	0	0.9004	0	0	0	0	0	0	0.9132	0	0	0	0	0	7.6841	0.798	0	0	0	0	0	0	0	0	0	0	0	0	0.682	0	0
AC008154.4	1.2806	0	0	0	1.4033	0	0	0	0.9661	3.5838	0	0	0	0	0	0	0	0.7664	0	0.9004	1.0457	0	0.9367	0	1.2706	1.2904	0	0	0	1.0825	0	0	0	0	0	0	0	0	1.0852	0	0	0	0	0	0	0	0	0	0
AC008154.5	0	0	0	0	0	0	0	0	0	0	0	0	0	0	0	0	0	0	0	0	0	0	0	0	0	0	0	0	0	0	0	0	0	0	0	0	0	0	0	0	0	0	0	0	0	0	0	0	0
AC008155.1	0	0	0	0	0	0	0	0	0	0	0	0	0	0	0	0	0	0	0	0	0	0	0	0	0	0	0	0	0	0	0	0	0	0	0	0	0	0	0	0	0	0	0	0	0	0	0	0	0
AC008155.2	0	0	0	0	0	0	0	0	0	3.5838	0	0	0	0	0.9967	0	0	0.7664	0	0	0	0	0	1.8375	0	1.2904	0	0	0	0	0	0	0	0	0	0	0	0.8912	0.5426	0	0	0	0	1.564	0	0	0.682	0	0
AC008166.1	0	0	0	0	0	0	0	0	0	0	0	0	0	0	0	0	0	0	0	0	0	0	0	0	0	0	0	0	0	0	0	0	0	0	0	0	0	0	0	0	0	0	0	0	0	0	0	0	0
AC008171.1	2.5612	23.2701	0	0	2.8067	6.2109	0	0	0.9661	0	1.3545	2.1844	1.1378	0	1.9933	3.3718	1.3187	2.2992	5.0862	3.6015	3.1372	3.5345	2.81	4.5938	2.5411	0	2.7395	0	1.6443	0	0	0	0.9605	0	0	1.5534	1.9866	0.8912	2.713	0.7863	0	0.779	0	0.782	2.6193	1.5966	1.364	0	0
AC008173.1	0	0	0	0	0	0	0	0	0	0	0	0	0	0	0	0	0	0	0	0	0	0	0	0	0	0	0	0	0	0	0	0	0	0	0	0	0	0	0	0	0	0	0	0	0	0	0	0	0
AC008175.1	0	0	0	0	0	0	0	0	0	0	0	0	0	0	0	0	0	0.7664	0	0	0	0	0	0	1.2706	0	0.9132	0	0	0	0	0	0	0	0	1.5534	0	0	1.0852	0	0	0	0	0	0	0	0	0	0
AC008264.4	7.6835	0	0	4.4486	1.4033	6.2109	0	1.0421	5.7968	3.5838	4.0634	8.7376	3.4134	0	0.9967	3.3718	3.9562	6.1313	1.0172	1.8008	0	0.8836	2.81	4.5938	6.3528	10.3232	6.3922	1.2756	1.6443	2.1651	0.9077	2.8533	0	1.5961	1.956	2.3301	2.9799	0	5.4261	0.7863	3.5982	3.1162	2.8127	0.782	0	5.588	2.7281	0	0
AC008265.2	0	0	0	0	1.4033	0	0	0	0	0	1.3545	0	0	0	0	0	0	0	0	0	0	0	0	0	0	0	0	1.2756	0	0	0	0	0	0	0	0	0	0.8912	0	0	0	0	0	0	0	0	0	0	0
AC008268.1	0	0	0	0	0	0	0	0	0	0	0	0	0	0	0	0	5.2749	0	0	0	0	0	0	0	0	0	0	0	0	0	0	0	0	0	0	0	0	0	0	0	0	0	0	0	0	0	0	0	0
AC008268.2	0	0	5.6241	0	0	2.4844	0	2.0843	4.8307	7.1676	0	0	0	0	0	0	3.9562	0	1.0172	1.8008	0	2.6509	0	1.8375	0	0	1.8263	0	0	0	0	0	33.618	0	3.9121	0	2.9799	0	0	0	0.8995	4.6743	0	1.564	0	7.1846	0	0	0
AC008269.2	5.1224	0	2.8121	1.1121	4.21	11.1797	0	0	3.8645	0	2.7089	7.6454	2.2756	5.278	9.9667	4.4957	2.6374	3.832	10.1725	3.6015	4.183	6.1854	1.8733	11.9439	1.2706	20.6464	6.3922	7.6535	0.8221	10.8254	0.9077	6.6578	1.921	0	4.8901	1.5534	3.9732	1.7823	3.2557	7.8634	0	0	4.6879	2.3459	0.8731	0	4.0921	0.7671	0
AC008271.1	0	0	0	0	0	0	0	0	0	0	0	0	0	0	0	0	0	0	0	0.9004	0	0	0	0	1.2706	0	0	0	0	0	0	0	0	0	0	0	0	0	0.5426	0	0.8995	0	0	0	0	0	0	0	0
AC008277.1	67.8713	61.0841	13.1229	18.9065	21.0501	67.0782	5.7634	10.4215	27.0516	26.8785	50.1153	21.8441	25.0316	30.3482	20.93	30.3461	64.6173	14.5618	21.3622	10.8045	34.5097	15.9054	47.7699	50.5319	66.0695	74.8431	25.5689	38.2673	17.2649	30.3111	40.8445	38.9956	26.8944	23.941	22.4943	17.0873	27.8121	13.3675	15.7357	29.881	44.0778	31.1619	17.814	32.8431	20.9548	3.9914	21.1427	12.273	0
AC008278.2	0	0	0	0	0	0	0	0	0	0	0	0	0	0	0	0	0	0	0	0	0	0	0	0	0	0	0	0	0	0	0	0	0	0	0	0	0	0	0	0	0	0	0	0	0	0	0	0	0
AC008278.3	0	0	0	0	0	0	0	0	0	1.7919	0	0	0	1.3195	0	0	0	0	0	0.9004	1.0457	1.7673	0	0	0	0	0	0	0	0	0	0	0	0	0.978	0	0	0	0	0	0	0	0	0	0	0.7983	0	0	0
AC008280.1	2.5612	5.8175	6.5615	3.3364	8.42	3.7266	0	4.1686	6.7629	7.1676	5.4179	9.8298	3.4134	1.3195	2.99	3.3718	9.231	0.7664	7.1207	8.1034	7.3202	3.5345	5.62	12.8627	3.8117	15.4848	2.7395	3.8267	0.8221	1.0825	2.723	11.4133	2.8815	1.5961	2.934	0.7767	6.953	2.6735	1.0852	3.9317	4.4977	3.1162	7.5006	1.564	0.8731	1.5966	0.682	6.1365	0
AC008280.3	2.5612	0	2.8121	0	4.21	0	0	7.295	0	5.3757	0	2.1844	2.2756	2.639	4.9833	2.2479	0	0	4.069	2.7011	0	7.9527	2.81	3.6751	0	3.8712	3.6527	2.5512	0	5.4127	0	0	1.921	1.5961	0.978	0.7767	0	2.6735	0	3.9317	0	1.5581	0	2.3459	0.8731	0	0	1.5341	0
AC008281.1	0	0	0	0	0	0	0	0	0	5.3757	0	1.0922	0	0	0	0	0	0	0	0	0	0	0	0	0	0	0	0	0	0	0	2.8533	0	0	0	0	0	0	0	0	0	0	0	0	0	0	0	0	0
AC008391.1	0	0	0	0	0	0	2.8817	0	0	0	0	0	0	0	0	0	0	0	0	0	0	0	0	0	0	0	0	0	0	0	0	0	0	0	0	0	0	0	0	0	0	0.779	0	0	0	0	0	0	0
AC008410.1	0	0	0	0	0	0	0	0	0	0	0	0	0	0	0	0	0	0	0	0	0	0	0	0	0	0	0	0	0	0	0	0	0	0	0	0	0	0	0	0	0	0	0	0	0	0	0	0	0
AC008427.2	2.5612	11.6351	0.9374	0	0	8.6953	0	0	0	0	6.7723	2.1844	0	1.3195	0.9967	1.1239	1.3187	2.2992	0	0	0	0.8836	0	1.8375	1.2706	3.8712	0	0	0	1.0825	0.9077	0.9511	1.921	0	0	0	0	0	1.0852	0	0.8995	0	1.8752	0	0	0	0	2.3012	0
AC008440.5	0	5.8175	0	0	0	0	0	0	0	0	0	0	0	0	0	0	0	0	0	0	0	0	0	0	0	0	0	0	0	0	0	0	0	0	0	0	0.9933	0	0	0	0	0	0	0	0	0	0	0	35.5694
AC008449.1	0	0	0	0	0	0	0	0	0	0	0	0	0	0	0	0	0	0	0	0	0	0	0	0	0	0	0	0	0	0	0	0	0	0	0	0	0	0	0	0	0	0	0	0	0	0	0	0	0
AC008536.1	0	0	0.9374	0	0	0	0	0	0	0	0	0	0	0	0	0	0	0.7664	0	0	0	0	0	0	0	0	0	0	0	0	0	0	0	0	0	0.7767	0	0	0.5426	0	0	0	0	0.782	0	0	0	0	5.9282
AC008565.1	0	0	0	0	0	0	0	0	0	0	0	0	0	0	0	0	0	0	0	0	0	0	0	0	0	0	0	0	0	0	0	0	0	0	0	0	0	0	0	0	0	0	0	0	0	0	0	0	0
AC008581.1	0	0	0.9374	0	0	0	0	0	0.9661	0	0	0	0	0	0	0	0	0	1.0172	0	0	0	0	0	0	0	0	0	0	0	0	0	0	0	0	0	0	0	0	0	0	0	0	0	0	0	0	0	0
AC008592.3	0	0	0	1.1121	4.21	0	0	2.0843	0	0	0	1.0922	3.4134	1.3195	5.98	0	1.3187	0	0	1.8008	0	0.8836	0	0	0	2.5808	0.9132	0	0.8221	3.2476	2.723	0	0	0	0	1.5534	0	0	0.5426	2.359	0	2.3371	0.9376	2.3459	0	0.7983	2.7281	0	0
AC008592.4	0	0	0	0	0	0	0	0	0	0	0	0	0	0	0	1.1239	0	1.5328	0	0	0	0.8836	0	0.9188	0	1.2904	0	0	0	1.0825	0	0	0	0	0	0	0	0	0	0	0	0	0	0.782	0	0	0.682	0	0
AC008592.5	1.2806	0	0	0	2.8067	1.2422	0	5.2107	0.9661	0	1.3545	1.0922	0	1.3195	0.9967	0	3.9562	0	0	0	0	0.8836	0	0	0	1.2904	0	0	0.8221	0	0.9077	0	0	0.798	0	0	0	0	0	0	0	0	0	0	0.8731	0	0	0	0
AC008592.7	3.8418	2.9088	0.9374	0	4.21	8.6953	0	5.2107	0.9661	0	2.7089	2.1844	2.2756	1.3195	2.99	1.1239	0	0	2.0345	0	0	0	0	4.5938	2.5411	0	0	1.2756	1.6443	0	0	0.9511	0.9605	0.798	0	0.7767	0	0	0.5426	0.7863	0	0.779	1.8752	0.782	0	0	1.364	0	0
AC008592.8	6.4029	0	0	0	0	0	0	1.0421	0	0	1.3545	2.1844	0	1.3195	0.9967	2.2479	1.3187	0.7664	2.0345	0	0	0.8836	0	3.6751	0	2.5808	1.8263	0	0	0	0	0	0.9605	0	0	1.5534	0	0	1.0852	0.7863	0	0	0.9376	0	0	1.5966	0	0	0
AC008598.1	0	0	0	0	0	0	0	0	0	0	0	0	0	0	0	0	0	0	0	0	0	0	0	0	0	0	0	0	0	0	0	0	0	0	0	0	0	0	0	0	0	0	0	0	0	0	0	0	0
AC008625.1	0	0	0	0	0	0	0	0	0	0	0	0	0	0	0	0	0	0	0	0	0	0	0	0	0	0	0	0	0	0	0	0	0	0	0	0	0	0	0	0	0	0	0	0	0	0	0	0	0
AC008626.1	0	0	0	0	0	0	0	0	0	0	0	0	0	0	0	0	0	0	0	0.9004	0	0	0	0	0	0	0	0	0	0	0	0	0	0	0	0.7767	0	0	1.0852	0	0	0	0	0	0	0	0	0	0
AC008671.1	0	0	0	0	0	0	0	0	0	0	0	0	0	0	0	0	0	0	0	0	0	0	0	0	0	0	0	0	0	0	0	0	0	0	0	0	0	0	0	0	0	0	0	0	0	0	0	0	0
AC008674.1	0	0	0	0	0	0	0	0	0	0	0	0	0	0	0	0	0	0	0	0	0	0	0	0	0	0	0	0	0	0	0	0	0	0	0	0	0	0	0	0	0	0	0	0	0	0	0	0	0
AC008694.2	0	0	0	0	0	0	0	0	0	0	0	0	0	0	0	0	0	0	0	0	0	0	0	0	0	0	0	0	0	0	0	0	0	0	0	0	0	0	0	0	0	0	0	0	0	0	0	0	0
AC008694.3	0	0	0	0	0	1.2422	5.7634	0	0	0	0	0	0	0	0	0	0	0	0	0	0	0.8836	0.9367	0.9188	2.5411	1.2904	0	0	0	0	0	0	0	0	0.978	0	0	0	0	0.7863	0.8995	0	0	0.782	0	0	0.682	0	0
AC008697.1	7.6835	5.8175	11.2482	11.1215	18.2434	14.9063	8.6452	4.1686	17.3903	8.9595	13.5447	5.461	14.7914	6.5974	9.9667	22.4786	19.7808	10.7297	14.2415	12.6053	18.8235	10.6036	7.4933	11.0252	12.7057	28.3888	6.3922	14.0314	15.6207	8.6603	29.045	28.5333	8.6446	10.3745	9.7801	10.8738	3.9732	8.9116	11.3948	3.9317	7.1964	20.2552	1.8752	17.2035	5.2387	11.176	4.0921	2.3012	11.8565
AC008703.1	2.5612	0	1.8747	3.3364	4.21	2.4844	0	0	0.9661	5.3757	1.3545	3.2766	4.5512	1.3195	2.99	1.1239	3.9562	1.5328	3.0517	0	4.183	5.3018	1.8733	0.9188	0	6.452	0.9132	2.5512	0.8221	2.1651	4.5383	1.9022	0.9605	3.1921	1.956	0.7767	4.9664	3.5647	1.0852	0.7863	0.8995	0.779	0	3.1279	0	2.3949	0	1.5341	0
AC008703.2	0	0	0	0	0	0	0	0	0	0	0	0	0	0	0	0	0	0	0	0	0	0	0	0	0	0	0	0	0	0	0	0	0	0	0	0	0	0.8912	0	0	0	0	0	0	0	0	0	0	0
AC008746.10	0	0	0	0	0	0	0	0	0	0	0	0	0	0	0	0	1.3187	0	0	0	0	0	0	0	0	1.2904	0	0	0.8221	0	0	0	0	3.1921	0	0	0	0	0	0	0.8995	0	0	0	0.8731	0	0	0.7671	0
AC008746.12	35.8565	125.077	48.7423	35.5887	58.9403	63.3516	57.6344	76.0767	33.8146	73.4678	46.0519	57.8868	65.9923	102.92	53.8201	68.5598	110.772	52.1158	67.1384	35.1147	50.1959	53.9015	40.2766	56.9633	76.2341	61.9391	49.3114	39.5429	41.107	32.4761	54.4593	54.2134	36.4996	24.7391	20.5383	31.8446	51.6511	39.2112	42.3235	32.24	29.6851	30.3828	11.251	39.8809	24.4472	25.5451	25.9169	35.2849	0
AC008746.3	1.2806	0	5.6241	7.785	15.4367	7.4531	14.4086	12.5058	2.8984	16.1271	2.7089	6.5532	9.1024	14.5144	4.9833	6.7436	10.5498	13.7954	7.1207	4.5019	6.2745	6.1854	8.43	7.3501	7.6234	6.452	5.479	5.1023	4.9328	7.5778	3.6306	0.9511	3.8421	2.3941	0	3.8835	7.9463	8.0205	9.2244	5.5044	2.6986	1.5581	0	4.6919	4.3656	9.5794	2.7281	5.3694	11.8565
AC008746.5	16.6477	8.7263	6.5615	2.2243	7.0167	14.9063	0	12.5058	3.8645	3.5838	5.4179	6.5532	17.067	15.8339	10.9634	6.7436	10.5498	6.8977	7.1207	0.9004	12.549	2.6509	6.5567	16.5377	2.5411	23.2272	7.3054	8.929	5.755	2.1651	2.723	0.9511	5.7631	4.7882	0.978	0.7767	2.9799	5.347	1.6278	3.9317	0.8995	7.0114	0.9376	7.0378	4.3656	0.7983	2.0461	9.9718	0
AC008746.9	0	0	0	0	0	0	0	0	0	0	0	0	0	0	0	0	0	0	0	0.9004	0	0	0	0	0	0	0	0	0	0	0	0	0	0	0	0	0	0	0	0	0	0	0	0	0	0	0	0	0
AC008752.1	0	0	0	0	0	0	0	0	0	0	0	0	0	0	0	0	0	0	0	0	0	0	0	0	0	0	0	0	0	0	0	0	0	0	0	0	0	0	0	0	0	0	0	0	0	0	0	0	0
AC008753.3	0	0	2.8121	0	0	0	0	0	0	0	0	0	0	0	0	0	0	0.7664	0	0	0	0	0	0	0	0	0	0	0	0	0	0	0	0.798	0.978	0	0	0	0	0	0	0	2.8127	0	0	0	0	0	0
AC008753.4	1.2806	0	1.8747	0	1.4033	0	0	0	0	0	0	0	0	0	0.9967	0	1.3187	0	0	1.8008	0	0	0	0	0	0	0	0	0	0	0	0	0	0	0	0	0	0	0	0	0	0	0.9376	0	0.8731	0	0	0	0
AC008753.6	3.8418	0	3.7494	3.3364	1.4033	0	2.8817	2.0843	0.9661	5.3757	0	5.461	0	1.3195	0.9967	2.2479	2.6374	0.7664	2.0345	3.6015	2.0915	4.4182	0.9367	4.5938	2.5411	2.5808	1.8263	1.2756	0.8221	1.0825	0	1.9022	0	0	4.8901	1.5534	0	0	5.4261	0	0	2.3371	0	0.782	0	4.7897	0.682	0	5.9282
AC008781.7	0	8.7263	0	0	0	2.4844	0	0	0	0	2.7089	0	0	0	0	0	0	1.5328	0	0	0	0.8836	0	0	0	0	0	0	0	3.2476	1.8153	0	0	0	0	1.5534	0	0	0	0	0	0	1.8752	0	0	0	0	0	0
AC008834.1	0	0	0	0	0	0	0	0	0	0	0	0	0	0	0	0	0	0	0	0	0	0	0	0	0	0	0	0	0	0	0	0	0	0	0	0	0	0	0	0	0	0	0	0	0	0	0	0	0
AC008834.2	0	0	0	0	0	0	0	0	0	0	0	0	0	0	0	0	0	0	0	0	0	0	0	0	0	0	0	0	0	0	0	0	0	0	0	0	0	0	0	0	0	0	0	0	0	0	0	0	0
AC008836.1	0	0	0	0	0	0	0	0	0	0	0	0	0	0	0	0	0	0	0	0	0	0	0	0	0	0	0	0	0	0	0	0	0	0	0	0	0	0	0	0	0	0	0	0	0	0	0	0	0
AC008850.3	5.1224	5.8175	1.8747	10.0093	4.21	7.4531	0	5.2107	3.8645	7.1676	1.3545	5.461	11.378	5.278	3.9867	1.1239	15.8246	2.2992	3.0517	0	10.4575	4.4182	3.7467	7.3501	1.2706	12.904	0	3.8267	0.8221	4.3302	3.6306	2.8533	1.921	1.5961	0	3.8835	0.9933	1.7823	0	1.5727	0.8995	2.3371	2.8127	0	2.6193	1.5966	1.364	2.3012	0
AC008937.2	21.77	20.3614	7.4988	11.1215	14.0334	8.6953	0	8.3372	2.8984	12.5433	14.8992	6.5532	1.1378	14.5144	1.9933	10.1154	6.5936	7.6641	3.0517	0.9004	6.2745	8.8363	6.5567	10.1064	16.5174	23.2272	8.2186	3.8267	5.755	9.7428	14.5225	4.7556	6.7236	1.5961	3.9121	4.6602	8.9396	0	11.3948	3.9317	8.0959	6.2324	7.5006	5.4739	0.8731	1.5966	3.4101	3.8353	5.9282
AC008937.3	3.8418	2.9088	0	1.1121	1.4033	1.2422	8.6452	2.0843	3.8645	3.5838	0	4.3688	2.2756	3.9585	0.9967	4.4957	11.8685	2.2992	2.0345	1.8008	4.183	2.6509	0	2.7563	1.2706	3.8712	2.7395	5.1023	3.2886	3.2476	0	1.9022	0	0	3.9121	1.5534	0.9933	2.6735	3.7983	0	3.5982	0.779	0	1.564	1.7462	0.7983	4.0921	5.3694	0
AC008938.1	0	0	0	0	0	0	0	0	0	0	0	0	0	0	0	0	0	0	0	0	0	0	0	0	0	0	0	0	0	0	0	0	0	0	0	0	0	0	0	0	0	0	0	0	0	0	0	0	0
AC008940.1	0	0	0	1.1121	0	0	0	0	0	1.7919	0	0	3.4134	1.3195	0	2.2479	1.3187	1.5328	0	0	0	1.7673	0	1.8375	0	0	0	2.5512	0	0	0	2.8533	0	0	0	0	1.9866	0	1.6278	0	5.3973	0	0.9376	0	0	1.5966	0.682	0	0
AC008949.1	0	0	0	0	0	0	0	0	0	0	0	0	0	0	0	0	0	0	0	0	0	0	0	0	0	0	0	0	0	0	0	0	0	0	0	0	0	0	0	0	0	0	0	0	0	0	0	0	0
AC008967.1	0	0	0	0	0	0	0	0	0	0	0	0	0	0	0	0	0	0	0	0	0	0	0	0	0	0	0	0	0	0	0	0	0	0	0	0	0	0	0	0	0	0	0	0	0	0	0	0	0
AC008982.2	29.4536	17.4526	4.6868	10.0093	11.2267	14.9063	23.0537	20.8429	9.6613	41.2136	27.0894	31.6739	11.378	6.5974	9.9667	10.1154	14.5059	11.4961	9.1552	25.2106	7.3202	9.7199	5.62	17.4565	5.0823	15.4848	5.479	7.6535	11.51	1.0825	0.9077	6.6578	2.8815	3.9902	9.7801	0.7767	0.9933	3.5647	4.3409	3.9317	4.4977	1.5581	2.8127	3.1279	3.4925	9.5794	3.4101	2.3012	23.7129
AC008984.2	5.1224	0	0.9374	1.1121	0	1.2422	0	0	0	0	0	1.0922	0	1.3195	0	0	2.6374	0.7664	0	1.8008	1.0457	0.8836	0	0.9188	0	1.2904	5.479	1.2756	0	0	0	2.8533	1.921	0	0.978	0	0	0	1.6278	0	0	0	0	0	0	3.1931	0.682	0	0
AC008984.5	0	0	0	0	0	0	0	0	0	0	0	0	0	0	0	0	0	0	0	0	0	0	0	0	0	0	0	0	0	0	0	0	0	0	0	0	0	0	0	0	0	0	0	0	0	0	0	0	0
AC008984.6	0	0	0	0	1.4033	0	0	0	0	0	0	0	1.1378	0	1.9933	0	0	0	0	0	0	0	0	0	0	0	0	0	0	0	0	0	0.9605	0	0	0	0	0	0.5426	0	0	0	0	0	0	0	0	0	0
AC008984.7	2.5612	0	0	0	2.8067	0	0	0	0	0	0	0	0	1.3195	0	0	6.5936	0	0	0	0	0	0.9367	0	0	0	0.9132	0	0	0	0	0	0	0	0	0	0	0	0	0	0	0	0	0	0	0	0	0	0
AC008985.1	120.375	58.1753	89.9857	62.2802	71.5704	54.6563	69.1612	65.6553	47.3404	53.7569	134.092	74.2699	34.1339	106.879	55.8134	66.3119	58.0237	51.3494	73.2419	71.1298	35.5555	38.8798	70.2499	70.7447	57.1755	61.9391	59.3564	54.8499	49.3284	57.3745	47.1981	55.1645	47.0652	66.2369	41.0766	41.9416	54.6309	29.4084	39.0678	33.8127	66.5665	47.5218	24.3771	37.535	34.0515	49.4936	40.2394	49.8591	35.5694
AC008991.1	0	63.9928	14.0603	0	0	358.992	2.8817	33.3487	0	26.8785	0	92.8373	62.5789	9.2364	26.9101	4.4957	69.8922	40.6196	18.3105	63.9268	87.8429	1.7673	0	38.588	72.4224	77.4239	99.5361	66.3301	15.6207	35.7238	0.9077	39.9467	310.246	11.9705	111.494	34.1747	9.9329	34.7554	0.5426	21.2312	19.79	42.0685	4.6879	28.9332	88.1847	12.7725	7.5023	32.9837	17.7847
AC008992.1	5.1224	0	0	0	0	0	0	0	0	0	0	0	0	0	0	0	0	0	0	0	0	0	0	0.9188	0	0	0	0	0	0	0	0	0	0	0	0	0	0	0	0	0	0.779	0	0	0	0	0	0	0
AC009005.2	3.8418	0	0.9374	4.4486	2.8067	1.2422	8.6452	6.2529	1.9323	0	0	1.0922	2.2756	2.639	0.9967	0	6.5936	1.5328	0	2.7011	1.0457	4.4182	0	1.8375	2.5411	1.2904	2.7395	1.2756	1.6443	0	0.9077	0.9511	1.921	0.798	0.978	5.4369	0	1.7823	1.0852	1.5727	0	1.5581	0	3.9099	0.8731	4.7897	2.7281	9.2048	5.9282
AC009009.1	0	5.8175	0	0	0	0	0	0	0	0	0	0	0	0	0.9967	0	0	0	0	0	0	0	0	0	0	1.2904	0	0	0	0	0	0	0	0	0	0	0	0	0	0	0	0	0	0	0	0	0	0	0
AC009014.3	34.5759	459.585	188.408	45.598	29.4701	11.1797	803.999	5.2107	10.6274	5.3757	142.219	30.5817	44.3741	197.923	133.554	237.149	40.8803	196.967	207.519	274.615	82.6142	410.888	28.1	21.1315	5.0823	85.1663	135.15	113.526	179.227	73.6126	212.391	381.396	0	12.7686	109.538	71.4561	612.86	222.791	265.878	610.987	57.571	155.809	330.028	248.669	49.7676	35.1245	295.998	35.2849	207.488
AC009035.1	0	0	0	0	0	0	0	0	0	0	0	0	0	0	0	0	0	0	0	0	0	0	0	0	0	0	0	0	0	0	0	0	0	0	0	0	0	0	0	0	0	0	0	0	0	0	0	0	0
AC009052.12	0	2.9088	0	1.1121	1.4033	4.9688	0	0	0	0	0	0	0	0	0.9967	2.2479	0	2.2992	2.0345	3.6015	0	0	0	0	0	0	0.9132	1.2756	0.8221	0	0	0	0.9605	0.798	0.978	0	0.9933	1.7823	1.0852	1.5727	0	0	0	0.782	0	0.7983	0.682	0	29.6412
AC009065.1	0	0	0	0	0	0	0	0	0	0	0	1.0922	0	0	0	0	0	0.7664	0	0	0	0	0	0	0	0	0	0	0	0	0	0	0	0	0	0	0	0	0	0	0	0	0	0	0	0	0	0	0
AC009065.2	0	0	0	0	0	0	0	0	0	0	0	0	0	0	0	0	0	0	0	0	0	0	0	0	0	0	0	0	0	0	0	0	0	0	0	0	0	0	0	0	0	0	0	0	0	0	0	0	0
AC009080.1	0	0	0	0	0	0	0	0	0	0	0	0	0	0	0	0	0	0	0	0	0	0	0	0	0	0	0	0	0	0	0	0	0	0	0	0	0	0	0	0	0	0	0	0	0	0	0	0	0
AC009081.1	0	0	0	0	0	0	0	0	0	0	0	0	0	0	0	0	0	0	0	0	0	0	0	0	0	0	0	0	0	0	0	0	0	0	0	0	0	0	0	0	0	0	0	0	0	0	0	0	0
AC009095.4	16.6477	2.9088	7.4988	17.7944	2.8067	11.1797	5.7634	10.4215	35.7468	12.5433	0	16.3831	14.7914	19.7923	20.93	0	14.5059	11.4961	14.2415	3.6015	5.2287	15.9054	8.43	7.3501	17.7879	24.5176	4.5659	0	3.2886	6.4952	0	0	0	2.3941	0	11.6505	21.8524	0	0	7.0771	0	3.8952	14.0637	1.564	1.7462	0	10.2304	0	0
AC009110.1	0	0	0	0	0	0	0	0	0	0	0	0	0	0	0	0	0	0	0	0	0	0	0	0	0	0	0	0	0	0	0	0	0	0	0	0	0	0	0	0	0	0	0	0	0	0	0	0	0
AC009120.10	1.2806	0	0.9374	0	0	8.6953	0	2.0843	1.9323	1.7919	0	6.5532	0	1.3195	1.9933	2.2479	0	2.2992	2.0345	2.7011	1.0457	0	0	4.5938	2.5411	5.1616	0	6.3779	1.6443	2.1651	0	0	0	0.798	0.978	5.4369	0	0.8912	1.6278	6.2907	1.7991	3.8952	1.8752	2.3459	4.3656	0	4.0921	3.0683	0
AC009120.3	21.77	8.7263	36.5567	12.2336	28.0668	43.4766	11.5269	22.9272	31.8823	19.7109	23.026	20.7519	17.067	43.5431	27.9067	17.9829	11.8685	25.2915	20.345	32.4136	29.281	22.9744	8.43	29.4004	7.6234	38.712	28.3084	38.2673	18.0871	15.1555	14.5225	19.9733	21.1313	21.5469	23.4723	27.9611	18.8725	21.3879	26.0452	31.4537	5.3973	14.0228	6.5631	38.317	17.4623	36.7211	29.327	17.6424	0
AC009120.4	11.5253	11.6351	0	4.4486	7.0167	7.4531	0	2.0843	14.492	7.1676	1586.08	21.8441	10.2402	5.278	6.9767	7.8675	1.3187	8.4305	8.138	6.3026	1.0457	3.5345	0.9367	11.9439	6.3528	10.3232	4.5659	12.7558	1.6443	4.3302	0.9077	7.6089	1.921	2.3941	3.9121	3.8835	7.9463	5.347	4.3409	6.2907	8.9955	5.4533	4.6879	1.564	8.7312	4.7897	6.8202	4.6024	0
AC009120.5	107.57	87.263	44.9929	36.7008	67.3603	96.8907	8.6452	27.0958	57.9678	87.803	70.4323	56.7946	43.2363	88.4057	62.7901	37.0897	87.0355	48.2837	33.5692	35.1147	44.9672	46.8324	25.29	77.1761	35.5759	83.8759	45.6587	53.5743	22.1978	53.0444	28.1373	32.3378	39.3811	19.1528	43.0326	20.9708	19.8658	19.6056	48.8348	47.1805	20.6896	22.5923	15.0013	44.5728	16.5892	22.352	34.7832	26.0801	5.9282
AC009120.6	437.962	526.486	259.646	222.429	311.542	427.313	89.3333	239.694	321.721	317.166	295.274	293.803	217.32	323.274	344.847	269.743	498.476	292.768	233.967	210.688	275.032	218.257	277.253	326.161	303.666	470.995	258.428	252.565	138.12	232.746	222.376	256.8	209.392	131.676	162.35	153.009	229.45	180.015	187.2	213.099	229.385	151.135	124.698	292.46	168.511	122.936	153.455	138.071	17.7847
AC009120.8	0	0	0	0	0	1.2422	0	1.0421	1.9323	0	0	1.0922	0	0	0	0	1.3187	0.7664	1.0172	0	0	0	0	0.9188	0	5.1616	0	6.3779	0	0	0	1.9022	0	0	0.978	0.7767	0.9933	0	0	3.1454	0.8995	0.779	0.9376	0	0	0	0	0	0
AC009121.1	0	0	0	0	1.4033	0	0	0	0	0	0	0	0	0	0	0	0	0	0	0	0	0	0	0	0	0	0	0	0	0	0	0	0	0	0	0	0	0	0	0	0	0	0	0	0	0	0	0	0
AC009127.1	0	0	0	0	0	0	0	0	0	0	0	0	0	0	0	0	0	0	0	0	0	0	0	0	0	0	0	0	0	0	0	0	0	0	0	0	0	0	0	0	0	0	0	0	0	0	0	0	0
AC009133.12	97.3248	61.0841	89.0484	104.542	126.301	316.758	164.258	73.9924	114.969	136.184	86.686	67.7166	304.93	172.853	111.627	106.773	175.39	180.872	120.035	226.895	82.6142	109.57	86.1732	126.789	54.6344	210.335	87.6648	62.5033	109.345	83.3554	34.4909	75.1378	73.9597	54.2664	57.7028	184.077	45.6913	895.62	186.115	104.583	68.3656	263.318	73.1312	158.742	60.245	81.425	92.7552	114.292	136.349
AC009133.15	61.4683	0	93.7351	182.392	85.6038	70.8047	328.516	92.7511	106.274	118.265	46.0519	60.0712	48.9253	60.6964	86.7102	51.7008	25.0557	210.762	68.1557	324.136	71.1109	110.454	50.5799	62.4759	35.5759	33.5504	70.3145	7.6535	104.412	74.6951	33.5832	3.8044	102.775	76.6113	68.461	91.6503	53.6377	384.983	87.9026	94.361	66.5665	57.6494	27.1898	126.68	134.46	344.06	68.8844	183.328	1547.27
AC009133.17	5.1224	2.9088	10.3109	1.1121	4.21	1.2422	0	0	1.9323	8.9595	1.3545	6.5532	0	0	3.9867	3.3718	3.9562	2.2992	17.2932	10.8045	5.2287	6.1854	6.5567	4.5938	2.5411	1.2904	3.6527	1.2756	1.6443	1.0825	3.6306	9.5111	0.9605	2.3941	0.978	14.7572	4.9664	1.7823	1.0852	1.5727	0.8995	2.3371	0	2.3459	1.7462	0.7983	8.1843	0	0
AC009133.21	0	0	5.6241	0	2.8067	8.6953	0	12.5058	2.8984	21.5028	8.1268	0	10.2402	14.5144	0	0	0	0	7.1207	13.5057	4.183	2.6509	0	8.2689	2.5411	0	0	7.6535	7.3993	0	4.5383	10.4622	6.7236	0.798	0	17.0873	0	0.8912	1.6278	6.2907	0	5.4533	6.5631	0	1.7462	0	0.682	7.6706	0
AC009133.22	3.8418	58.1753	148.101	25.5794	50.5203	22.3594	559.053	4.1686	19.3226	7.1676	10.8357	3.2766	79.6459	38.2651	33.8867	49.4529	0	121.093	26.4485	248.504	56.4704	143.148	44.9599	7.3501	17.7879	1.2904	64.8354	31.8895	118.388	24.8984	42.6598	49.4578	12.4867	61.4487	139.856	206.601	125.154	547.175	78.1357	109.302	226.686	124.647	37.5032	54.7385	59.3719	205.159	78.4327	94.3487	403.12
AC009133.24	0	11.6351	0	0	0	0	14.4086	1.0421	0.9661	0	0	0	0	0	2.99	1.1239	0	0	3.0517	0	2.0915	2.6509	0	0	0	1.2904	0	1.2756	0	0	0	0	0.9605	0	0	0	0	0	1.6278	0	0	0	0	0	0	0	0	1.5341	0
AC009134.1	1.2806	0	0	0	0	0	0	0	0.9661	0	1.3545	0	0	0	0	1.1239	0	0.7664	1.0172	0	0	0	0	0	0	0	0	0	0	0	0	0	0	0	0	0	0.9933	0	0	0	0	0	0	0	0	0	0	0	0
AC009158.1	0	0	0	0	0	0	0	0	0	0	0	0	0	0	0	0	0	0	0	0	0	0	0	0	0	0	0	0	0	0	0	0	0	0	0	0	0	0	0	0	0	0	0	0	0	0	0	0	0
AC009159.1	0	0	0	0	0	0	0	0	0	0	0	0	0	0	0	0	0	0	0	0	0	0	0	0	0	0	0	0	0	0	0	0	0	0	0	0	0	0	0	0	0	0	0	0	0	0	0	0	0
AC009161.1	0	0	0	0	0	0	0	0	0	0	0	0	0	0	0	0	0	0	0	0	0	0	0	0	0	0	0	0	0	0	0	0	0	0	0	0	0	0	0	0	0	0	0	0	0	0	0	0	0
AC009166.5	2.5612	20.3614	3.7494	2.2243	5.6134	13.6641	17.2903	2.0843	8.6952	0	0	7.6454	13.6536	2.639	13.9534	13.4872	17.1434	9.1969	5.0862	11.7049	5.2287	6.1854	4.6833	5.5126	1.2706	11.6136	5.479	2.5512	4.1107	2.1651	4.5383	5.7067	0	2.3941	0.978	3.1068	10.9262	4.4558	5.9687	3.9317	0.8995	5.4533	4.6879	2.3459	0.8731	1.5966	2.7281	0.7671	11.8565
AC009166.7	62.7489	127.986	22.4964	34.4766	37.8902	118.008	17.2903	2.0843	55.0694	12.5433	28.4438	29.4895	102.402	59.377	80.7302	82.0469	134.509	75.108	39.6727	66.6279	94.1174	57.436	53.3899	34.913	39.3876	78.7143	56.6168	105.873	17.2649	95.2633	37.2139	79.8934	3.8421	14.3646	48.9007	40.3882	56.6175	63.2726	37.44	71.5571	19.79	41.2895	15.0013	81.3258	38.4171	8.7811	61.3821	12.273	0
AC009196.1	0	0	0	0	0	0	0	0	0	0	0	0	0	0	0	0	0	0	0	0	0	0	0	0	0	0	0	0	0	0	0	0	0	0	0	0	0	0	0	0	0	0	0	0	0	0	0	0	0
AC009227.2	1.2806	5.8175	0	0	1.4033	0	0	1.0421	2.8984	1.7919	2.7089	2.1844	0	1.3195	0.9967	1.1239	0	0.7664	1.0172	2.7011	0	0	0	0.9188	0	1.2904	0	1.2756	1.6443	2.1651	2.723	0.9511	3.8421	0	0	1.5534	0.9933	0	0.5426	0.7863	2.6986	0	0	3.1279	1.7462	0	0.682	0	5.9282
AC009227.3	0	0	0	0	0	0	2.8817	0	0	0	0	0	0	0	0	2.2479	0	0	0	0.9004	0	0.8836	0	1.8375	0	1.2904	0	0	0	0	0	0	0	0	0	0	0	0	0	0	0	0	0	0	0	0	0	0	0
AC009228.1	1.2806	0	0.9374	0	0	1.2422	0	1.0421	1.9323	0	1.3545	0	0	0	0	0	0	0.7664	0	2.7011	0	0	0.9367	0.9188	2.5411	0	0	0	0	0	0.9077	0.9511	0.9605	0	0	0.7767	0	0	0	0.7863	0	0	1.8752	0.782	0	0	0.682	0.7671	0
AC009229.5	1.2806	0	2.8121	0	2.8067	0	0	0	0	0	4.0634	0	1.1378	0	1.9933	0	0	0	10.1725	0.9004	0	1.7673	0.9367	0.9188	2.5411	2.5808	0	1.2756	0.8221	0	0	2.8533	13.4472	3.1921	0	0	0.9933	0	0.5426	0.7863	0	1.5581	0	0	0.8731	0	0	0	0
AC009229.6	0	2.9088	3.7494	0	0	1.2422	0	0	1.9323	0	5.4179	0	2.2756	1.3195	0.9967	0	2.6374	0.7664	0	4.5019	0	0	0	0.9188	0	3.8712	0.9132	2.5512	0	0	0	0	2.8815	0.798	0	1.5534	0	0.8912	2.1704	0	0	0.779	12.1885	0	0	0	0.682	0.7671	0
AC009234.1	0	0	0	0	1.4033	0	0	0	0	0	8.1268	0	0	0	1.9933	0	0	0	1.0172	1.8008	1.0457	0	0	0	0	0	0	0	0	0	0	0	0	0	1.956	0	0	0	0	0	0	0	0	0.782	0	2.3949	0.682	0	0
AC009236.2	1.2806	0	0	0	0	0	0	0	1.9323	0	0	0	0	1.3195	0	0	0	0.7664	1.0172	0	0	1.7673	0	0	0	0	0	0	1.6443	0	2.723	0	0	0	0	0	0	0	0	0	1.7991	0	0	0	0	0	0	0.7671	0
AC009237.10	0	0	0	1.1121	0	0	0	0	0.9661	0	0	0	1.1378	0	0	0	0	0.7664	1.0172	0	0	1.7673	0	0	0	0	0	3.8267	0	0	0	0	0	0.798	0.978	0	0	0.8912	0.5426	0	0	0	0	2.3459	0	0	0.682	0	0
AC009237.11	3.8418	11.6351	5.6241	0	1.4033	8.6953	2.8817	1.0421	2.8984	10.7514	2.7089	3.2766	5.689	5.278	3.9867	7.8675	9.231	6.1313	9.1552	0.9004	5.2287	5.3018	4.6833	4.5938	6.3528	12.904	5.479	1.2756	4.1107	6.4952	5.4459	10.4622	0	2.3941	0.978	3.1068	3.9732	7.1293	3.2557	7.0771	3.5982	0	17.814	6.2558	3.4925	0.7983	2.7281	6.1365	0
AC009237.13	0	0	0	0	0	0	0	0	0	0	0	0	0	0	0	0	0	0	0	0	0	0	0	0	0	0	0	0	0	0	0	0	0	0	0	0	0	0	0	0	0	0	0	0	0	0	0	0	0
AC009237.14	0	0	0	0	0	0	0	0	0	0	0	0	0	0	0	0	0	0	0	0	0	0	0	0	0	0	0	0	0	0	0	0	0	0	0	0	0	0	0	0	0	0	0	0	0	0	0	0	0
AC009237.16	0	0	0	0	0	0	0	0	0	0	0	0	0	0	0	0	0	0	0	0	0	0	0	0	0	0	0	0	0	0	0	0	0	0	0	0	0	0	0	0.7863	0	0	0	0	0	0	0	0	0
AC009237.17	0	0	0	0	0	0	0	0	0	0	0	0	0	0	0	0	0	0	0	0	0	0	0	0	0	0	0	0	0	0	0	0	0	0	0	0	0	0	0	0	0	0	0	0	0	0	0	0	0
AC009237.2	0	0	0	0	0	0	0	1.0421	0	0	0	0	0	0	0	0	0	0	0	0	0	0	0	0	0	0	0	0	0	0	0	0	0	0	0	0	0	0	0	0	0	0	0	0	0	0	0	0	0
AC009237.4	0	0	0	0	0	0	0	0	0	0	0	0	0	0	0	0	0	0	0	0	0	0	0	0	0	0	0	0	0	0	0	0	0	0	0	0	0	0	0	0	0	0	0	0	0	0	0	0	0
AC009237.5	0	0	0	0	0	0	0	0	0	0	0	0	0	0	0.9967	0	0	0	0	0	0	0	0	0	0	0	0	0	0	0	0	0	0	0	0	0	0	0	0	0	0	0	0	0	0	0	0	0	0
AC009237.6	0	0	0	0	0	0	0	0	0	0	0	0	0	0	0	0	0	0	0	0	0	0	0	0	0	0	0	0	0	0	0	0	0	0	0	0	0	0	0	0	0	0	0	0	0	0	0	0	0
AC009237.8	47.3818	127.986	81.5496	30.028	23.8568	141.609	210.365	38.5594	49.2726	215.028	98.8762	98.2984	88.7483	122.712	94.6835	78.6751	162.203	169.376	92.5696	119.75	80.5227	80.4104	27.1633	52.3695	104.187	81.2951	96.7965	117.353	77.2812	110.419	77.1507	141.716	42.2627	103.745	63.5709	79.2231	98.3357	122.981	59.1444	164.345	56.6715	10.9066	71.256	200.186	66.3568	42.309	83.8889	127.332	82.9952
AC009238.6	0	0	0	0	0	0	0	0	0	0	0	0	0	0	0	0	0	0	0	0	0	0	0	0	0	0	0	0	0	0	0	0	0	0	0	0	0	0	0	0	0	0	0	0	0	0	0	0	0
AC009238.7	0	0	0	0	0	0	0	0	0	0	0	0	0	0	0	0	0	0	0	0	0	0	0	0	0	0	0	0	0	0	0	0	0	0	0	0	0	0	0	0	0	0	0	0	0	0	0	0	0
AC009238.8	0	0	0	0	0	0	0	0	0	0	0	0	0	0	0	0	0	0	0	0	0	0	0	0	0	0	0	0	0	0	0	0	0	0.798	0	0	0	0	0	0	0	0	0	0	0	0	0	0	0
AC009245.3	37.1371	69.8104	8.4362	0	0	6.2109	40.344	32.3066	14.492	34.0461	8.1268	13.1064	23.8938	6.5974	9.9667	6.7436	2.6374	0	5.0862	10.8045	8.366	3.5345	0	27.5629	10.1645	0	7.3054	6.3779	13.1542	35.7238	8.1689	4.7556	21.1313	6.3843	17.6043	3.8835	8.9396	9.8028	1.6278	0	8.9955	2.3371	7.5006	6.2558	16.5892	4.7897	10.2304	0	11.8565
AC009262.2	0	0	0	0	0	0	0	0	0	0	0	0	0	1.3195	0.9967	0	0	0	0	0	0	0	0.9367	0	0	0	0	1.2756	0	0	0	0	0.9605	0	0	0.7767	0	0	0	0	0	0	0	0	0	0	0	0	0
AC009263.2	0	0	0	0	0	0	0	0	0	0	0	0	1.1378	0	0	0	0	0	1.0172	0.9004	0	0	0	0	0	0	0	0	0	0	0	0	0	0	0	0	0	0	1.0852	0	0	0	0	0.782	0	0	0	0	0
AC009264.1	6.4029	0	0	0	1.4033	1.2422	0	1.0421	0	0	1.3545	0	0	0	0	0	0	0	0	2.7011	1.0457	0	0.9367	0	0	0	0	0	0	0	0	0.9511	0.9605	0	0	0	0	0	0	1.5727	0	0	0.9376	0.782	0	0	0.682	0	0
AC009274.6	5.1224	8.7263	0.9374	8.8972	8.42	3.7266	0	2.0843	7.729	5.3757	1.3545	2.1844	3.4134	2.639	4.9833	4.4957	6.5936	0.7664	4.069	0.9004	9.4117	3.5345	0.9367	2.7563	5.0823	2.5808	6.3922	5.1023	0.8221	1.0825	1.8153	2.8533	4.8026	3.1921	0.978	2.3301	2.9799	5.347	3.7983	3.9317	0.8995	3.1162	0.9376	0.782	0.8731	2.3949	0.682	2.3012	5.9282
AC009276.4	0	0	0	0	0	0	0	0	0	0	0	0	0	0	0	0	0	0	0	0	0	0	0	0	0	0	0	0	0	0	0	0	0	0	0	0	0	0	0	0	0	0	0	0	0	0	0	0	0
AC009297.1	0	0	0	0	0	0	0	0	0	0	0	0	0	0	0	0	0	0	0	0	0	0	0	0	0	0	0	0	0	0	0	0	0	0	0	0	0	0	0	0	0	0	0	0	0	0	0	0	0
AC009299.1	0	0	0	0	0	0	0	0	0	0	0	0	0	0	0	0	0	0	0	0	0	0	0	0	0	0	0	0	0	0	0	0	0	0	0	0	0	0	0	0	0	0	0	0	0	0	0	0	0
AC009299.2	11.5253	8.7263	10.3109	11.1215	5.6134	9.9375	0	4.1686	1.9323	8.9595	18.9626	9.8298	6.8268	9.2364	13.9534	14.6111	22.4182	3.0656	8.138	4.5019	7.3202	1.7673	9.3667	8.2689	24.1408	20.6464	5.479	10.2046	10.6878	4.3302	17.2455	15.2178	9.6052	8.7784	6.8461	14.7572	3.9732	3.5647	5.9687	4.718	7.1964	8.5695	9.3758	10.1657	9.6043	3.1931	7.5023	6.1365	5.9282
AC009299.3	11.5253	17.4526	5.6241	15.5701	18.2434	6.2109	0	4.1686	1.9323	48.3812	5.4179	42.596	3.4134	2.639	24.9167	35.9658	18.4621	6.8977	5.0862	11.7049	9.4117	24.7417	6.5567	11.0252	25.4114	20.6464	10.9581	25.5116	13.1542	0	28.1373	29.4845	0.9605	84.5917	3.9121	3.8835	41.7182	13.3675	15.7357	0.7863	0	31.9409	103.134	0.782	6.1118	5.588	21.1427	20.7107	29.6412
AC009299.4	0	0	0.9374	234.663	119.284	0	0	2.0843	0	1.7919	0	0	0	1.3195	0	2.2479	0	0.7664	0	3.6015	0	0.8836	8.43	0	0	2.5808	0	1.2756	0.8221	0	2.723	0	248.773	0	0.978	18.6407	0.9933	0	3.2557	1.5727	0	0	0.9376	0	0	0.7983	0	0	0
AC009299.5	12.8059	11.6351	50.617	33.3644	11.2267	7.4531	495.656	27.0958	19.3226	48.3812	6.7723	14.1987	19.3426	19.7923	5.98	28.0983	5.2749	55.1814	24.414	135.957	9.4117	43.2979	15.9233	21.1315	6.3528	1.2904	16.4371	17.8581	22.1978	8.6603	7.2612	6.6578	19.2103	18.3548	25.4284	8.5437	5.9597	72.1843	18.4487	15.7268	6.2968	21.0343	5.6255	25.0233	15.7161	360.026	17.0506	16.8754	4837.44
AC009302.2	0	0	0.9374	1.1121	0	1.2422	0	2.0843	0	0	1.3545	2.1844	2.2756	2.639	0	0	2.6374	0.7664	0	0	1.0457	1.7673	9.3667	0.9188	1.2706	0	1.8263	3.8267	0.8221	2.1651	0	0	0.9605	1.5961	0	0.7767	0.9933	0.8912	1.0852	1.5727	0	1.5581	0.9376	1.564	0.8731	0	2.0461	0.7671	0
AC009302.4	0	0	0	0	0	0	0	0	0	0	0	0	0	0	0	0	0	0	0	0	0	0	0	0	0	0	0	0	0	0	0	0	0	0	0	0	0	0	0	0	0	0	0	0	0	0	0	0	0
AC009303.1	101.167	130.894	52.4917	62.2802	61.747	75.7735	14.4086	57.3181	43.4759	60.9245	98.8762	72.0855	69.4057	46.1821	34.8834	52.8247	104.179	28.3571	53.9142	23.4098	36.6012	28.2762	54.3266	36.7505	90.2103	87.7471	40.1797	38.2673	42.7513	22.7333	51.7364	38.0445	26.8944	19.1528	27.3844	25.631	28.8054	24.0614	28.2157	30.6673	29.6851	31.1619	59.0675	21.1134	21.8279	20.7554	21.1427	49.092	0
AC009303.2	3.8418	17.4526	8.4362	12.2336	19.6468	14.9063	14.4086	13.5479	11.5936	12.5433	13.5447	13.1064	18.2048	6.5974	12.9567	20.2307	7.9123	9.9633	9.1552	14.406	13.5947	7.069	9.3667	5.5126	3.8117	18.0656	11.8713	10.2046	12.3321	16.2381	9.9842	7.6089	6.7236	11.1725	9.7801	12.4272	2.9799	16.041	7.0539	4.718	16.1918	10.1276	25.3146	16.4216	3.4925	16.764	9.5483	19.1766	0
AC009303.3	10.2447	20.3614	4.6868	7.785	7.0167	7.4531	0	2.0843	2.8984	5.3757	12.1902	4.3688	4.5512	10.5559	1.9933	6.7436	10.5498	5.3649	4.069	1.8008	4.183	1.7673	1.8733	3.6751	2.5411	9.0328	3.6527	5.1023	2.4664	2.1651	2.723	3.8044	0	4.7882	3.9121	3.8835	1.9866	0	1.6278	3.9317	1.7991	6.2324	0.9376	0.782	0.8731	3.9914	2.0461	2.3012	0
AC009305.1	3.8418	8.7263	1.8747	4.4486	0	1.2422	0	0	2.8984	1.7919	6.7723	5.461	2.2756	1.3195	5.98	4.4957	1.3187	3.0656	4.069	4.5019	1.0457	10.6036	3.7467	4.5938	2.5411	7.7424	3.6527	2.5512	0.8221	6.4952	1.8153	0.9511	0	0	0	0	1.9866	1.7823	3.7983	2.359	0.8995	3.1162	3.7503	0.782	1.7462	0.7983	0.682	1.5341	0
AC009305.2	0	0	0	0	0	0	0	0	0	0	0	0	0	0	0	0	0	0	0	0	0	0	0	0	0	0	0	0	0	0	0	0	0	0	0	0	0	0	0	0	0	0	0	0	0	0	0	0	0
AC009310.1	0	0	0	0	0	0	0	1.0421	0	7.1676	1.3545	1.0922	0	0	0	0	0	0	4.069	0	0	0	0	0	0	0	0	0	0	0	0	0	0	0	0	0	0	0	0	2.359	0	0	0	0	0	0	0.682	1.5341	0
AC009312.1	0	0	0.9374	0	0	0	0	0	0	0	0	0	0	0	0	0	0	0	0	0	0	0	0	0	0	0	0	1.2756	0	0	0	0	0	0	0	0	0	0	0	0	0	0	0.9376	0	0	0	0	0	0
AC009313.1	0	0	0	1.1121	0	0	0	0	0	0	2.7089	0	0	0	0	1.1239	0	0	0	0	0	0	0	0	0	0	0	0	0	0	0	0	0	0	0	0	0	0	0.5426	0	0	0	0	1.564	0	0	0	0	0
AC009313.2	3.8418	0	0	0	0	0	0	0	0	0	8.1268	2.1844	0	1.3195	0	2.2479	7.9123	0	0	0.9004	0	0.8836	0.9367	0	1.2706	2.5808	0	0	4.1107	0	0.9077	1.9022	0	0	0	0.7767	1.9866	0	3.7983	0	3.5982	0	0	3.9099	0.8731	0	0.682	0	0
AC009336.19	317.586	26.1789	57.1784	331.42	134.721	221.109	161.376	50.0231	249.262	96.7625	123.257	205.334	85.3349	127.99	232.224	291.098	135.828	318.06	69.1729	558.234	84.7057	216.489	134.88	372.099	128.327	500.675	168.024	256.391	48.5063	159.133	118.903	126.498	120.064	79.0054	116.384	38.8349	189.718	30.2996	240.918	206.022	125.937	57.6494	37.5032	71.1601	68.9762	164.446	205.971	11.5059	142.278
AC009362.2	7.6835	2.9088	1.8747	1.1121	4.21	1.2422	0	0	2.8984	1.7919	2.7089	4.3688	0	1.3195	0	2.2479	0	0.7664	6.1035	0	1.0457	1.7673	1.8733	1.8375	0	1.2904	0.9132	3.8267	4.1107	4.3302	0.9077	0.9511	2.8815	1.5961	1.956	0	0	0	1.0852	1.5727	1.7991	1.5581	3.7503	7.8198	0.8731	0	1.364	0	0
AC009365.4	0	0	0	0	0	0	0	0	0	0	0	0	0	0	0	0	0	0	0	0	0	0	0	0	0	0	0	0	0	1.0825	0	0	0	0	0	0	0	0	0	0	0	0	0	0	0	0	0	0	0
AC009403.2	11.5253	58.1753	37.4941	28.9158	49.1169	57.1406	69.1612	37.5173	34.7807	30.4623	47.4064	39.3193	98.9884	73.8913	57.8068	55.0726	83.0794	65.9111	48.8279	26.1109	55.4247	31.8107	19.67	34.913	34.3053	55.4871	56.6168	52.2987	41.9292	47.6317	37.2139	54.2134	38.4206	41.4978	39.1206	100.971	29.7987	76.6401	41.7809	60.5483	21.5891	133.996	90.9452	48.4827	37.544	17.5622	39.5574	36.052	35.5694
AC009404.2	51.2236	127.986	189.345	23.3551	33.6802	55.8985	25.9355	54.1916	39.6113	34.0461	32.5072	34.9505	85.3349	36.9457	65.7801	26.9743	80.4419	43.6853	73.2419	45.0188	36.6012	24.7417	33.72	42.2631	27.9525	63.2295	33.7875	53.5743	19.7314	56.292	25.4144	38.9956	17.2893	44.6899	23.4723	31.8446	42.7115	54.361	33.6418	52.6849	14.3928	26.4876	41.2535	24.2413	38.4171	23.1502	30.009	52.9273	41.4976
AC009410.1	0	2.9088	0	0	0	0	0	0	0	0	0	0	0	0	0	0	0	0	0	0	0	0	0	0	0	1.2904	0	0	0	0	0	0	0	0	0	0	0	0	0	3.9317	0	0	0	0	0	0	0	0	0
AC009411.1	0	0	0	0	0	0	2.8817	58.3602	1.9323	0	27.0894	1.0922	0	0	0	0	0	0	0	0	0	0	0	0.9188	0	0	0	0	0	0	1.8153	0	0	1.5961	0	0	0	0	0	0	0	0	0	0	0	0	0	1.5341	0
AC009411.2	1.2806	0	0	0	2.8067	0	0	147.985	1.9323	0	74.4958	2.1844	0	0	0	2.2479	0	0	1.0172	0	0	0	0.9367	0	0	0	0.9132	3.8267	0	0	3.6306	0	0.9605	2.3941	0	0	0	0	1.0852	0	0	0	0.9376	1.564	0	0	0	3.0683	0
AC009413.2	0	2.9088	0.9374	0	0	1.2422	0	1.0421	0	0	1.3545	0	2.2756	0	0	0	1.3187	0	4.069	0.9004	0	0.8836	0	2.7563	0	0	0	0	0.8221	0	0	0	0	0.798	0	0	0	0	0	0.7863	0	0.779	0	0.782	0	1.5966	0	0.7671	0
AC009414.1	0	0	0	0	0	0	0	0	0	0	0	0	0	0	0	0	0	0	0	0	0	0	0	0	0	0	0	0	0	0	0	0	0	0	0	0	0	0	0	0	0	0	0	0	0	0	0	0	0
AC009473.1	1.2806	17.4526	0.9374	2.2243	1.4033	3.7266	0	2.0843	6.7629	10.7514	1.3545	6.5532	3.4134	1.3195	4.9833	3.3718	10.5498	2.2992	3.0517	4.5019	4.183	6.1854	1.8733	10.1064	6.3528	7.7424	5.479	6.3779	2.4664	4.3302	1.8153	3.8044	0.9605	2.3941	0.978	6.2136	1.9866	0.8912	4.8835	2.359	7.1964	7.0114	3.7503	0.782	7.858	1.5966	2.0461	5.3694	0
AC009474.1	0	5.8175	0	2.2243	1.4033	0	0	0	0	0	0	2.1844	1.1378	0	1.9933	2.2479	0	0	0	6.3026	3.1372	1.7673	0.9367	5.5126	5.0823	1.2904	0.9132	0	0	1.0825	0	0	0.9605	0.798	0.978	1.5534	1.9866	0	2.713	0.7863	5.3973	0	0	0.782	0	4.7897	1.364	0	0
AC009474.2	0	0	0	0	0	0	0	0	0	0	0	0	0	0	0	0	0	0.7664	0	0	0	0	0	0	0	0	0	0	0	0	0	0	0	0	0	0	0	0	0	0	0	0	0	0	0	0	0	0	0
AC009477.7	0	0	0	0	0	0	0	0	0	0	0	0	0	0	0	0	0	0	0	0	0	0	0	0	0	0	0	0	0	0	0	0	0	0	0	0	0	0	0	0	0	0	0	0	0	0	0	0	0
AC009478.1	0	0	0	0	0	0	0	0	0.9661	0	0	0	0	0	0	1.1239	0	0.7664	0	0	0	0	0	3.6751	0	2.5808	0	0	0	0	0.9077	1.9022	0	0	0	0	0	0	0	1.5727	0	0	0	0	0	0	2.0461	0	0
AC009478.2	0	0	0	0	0	0	0	0	0	0	0	0	0	0	0	0	0	0	0	0	0	0	0	0	0	0	0	0	0	0	0	0	0	0	0	0	0	0	0	0	0	0	0	0	0	0	0	0	0
AC009480.1	0	0	0	0	0	0	0	0	0	0	0	0	0	0	0	1.1239	0	0	0	0	1.0457	0	0	0	0	0	0	0	0	0	0	0	0	0	0	0	0	0	0	0	0	0	0	0	0	0	0	0	0
AC009480.3	0	8.7263	0	1.1121	0	0	0	0	0.9661	0	0	1.0922	3.4134	0	0.9967	1.1239	0	1.5328	3.0517	0.9004	2.0915	3.5345	0.9367	3.6751	0	3.8712	1.8263	0	0	3.2476	0	1.9022	2.8815	0	0	1.5534	0	0	1.0852	1.5727	0	0.779	1.8752	1.564	0	0	0	0	0
AC009480.4	0	0	0	0	0	0	0	0	0	0	0	0	0	0	0	0	0	0	0	0	0	0	0	0	0	0	0	0	0	0	0	0	0	0	0	0	0	0	0	0	0	0	0	0	0	0	0	0	0
AC009487.4	0	0	0	0	0	0	0	0	0	0	0	0	0	0	0	0	0	0	0	0.9004	0	0	0	0	0	0	0	0	0	0	0	0	0	0	0	0	0	0	0	0	0	0	0	0	0	0	0	0	0
AC009487.5	0	0	0	0	0	0	0	0	0	5.3757	0	0	1.1378	0	0	0	0	0.7664	0	0	0	0	0.9367	0	0	0	0	0	0	0	0	0	0	0	0	0	0	0	0	0	0	0	0	0	0	0	0	0	0
AC009487.6	51.2236	52.3578	37.4941	24.4672	47.7136	58.3828	17.2903	94.8354	45.4081	80.6354	92.1038	58.979	48.9253	34.3067	37.8734	26.9743	19.7808	32.9556	59.0004	19.8083	42.8757	30.0434	36.53	64.3134	72.4224	38.712	54.7905	58.6766	52.617	71.4475	50.8287	19.0222	42.2627	67.833	51.8348	48.9319	22.8457	32.0819	45.0365	58.9756	23.3882	58.4285	82.507	71.942	31.4322	20.7554	32.0551	46.7908	11.8565
AC009494.3	0	0	0	0	0	0	0	0	0	0	0	0	0	0	0	0	0	0	0	0	0	0	0	0	0	0	0	0	0	0	0	0	0	0	0	0	0	0	0	0	0	0	0	0	0	0	0	0	0
AC009495.1	0	0	0	0	0	0	0	0	0	0	0	0	0	0	0	0	0	0	0	0	0	0	0	0	0	0	0	0	0	0	0	0	0	0	0	0	0	0	0	0	0	0	0	0	0	0	0	0	0
AC009495.2	2.5612	2.9088	2.8121	5.5607	8.42	8.6953	5.7634	0	0	0	0	3.2766	5.689	0	2.99	0	1.3187	6.1313	2.0345	0	2.0915	6.1854	1.8733	1.8375	2.5411	3.8712	0	1.2756	0	3.2476	5.4459	4.7556	0	3.9902	0.978	0.7767	2.9799	2.6735	0.5426	1.5727	0.8995	2.3371	0	0	0	3.9914	3.4101	0	0
AC009495.3	2.5612	0	0.9374	1.1121	1.4033	4.9688	5.7634	2.0843	0.9661	1.7919	1.3545	3.2766	2.2756	0	0	1.1239	0	2.2992	4.069	2.7011	3.1372	0	0	1.8375	0	6.452	0.9132	0	1.6443	1.0825	0	0.9511	1.921	0.798	0	2.3301	2.9799	5.347	1.0852	1.5727	0	1.5581	1.8752	1.564	0	1.5966	1.364	0	0
AC009495.4	0	0	0	6.6729	7.0167	2.4844	0	1.0421	0.9661	0	1.3545	1.0922	0	0	0	1.1239	0	0	0	7.203	0	2.6509	0	3.6751	0	7.7424	0.9132	5.1023	0	0	0.9077	0	0.9605	0	0	0	0	1.7823	3.2557	0.7863	0	0	0	0	0	0.7983	0	0	0
AC009498.1	0	0	0	0	0	0	0	0	0	1.7919	0	0	0	0	0	0	0	0	0	0	0	0	0	0	0	0	0	0	0	0	0	0	0	0	0	0	0	0	0	0	0	0	0	0	0	0	0	0	0
AC009500.2	0	0	0	0	0	0	0	0	0	0	0	0	0	0	0	0	0	0	0	0	0	0	0	0	0	0	0	0	0	0	0	0	0	0	0	0	0	0	0	0	0	0	0	0	0	0	0	0	0
AC009501.4	66.5907	46.5402	23.4338	27.8037	33.6802	75.7735	17.2903	13.5479	18.3565	37.6299	85.3315	39.3193	52.3387	17.1533	45.8468	49.4529	34.2867	34.4884	31.5347	46.8196	27.1895	22.0908	35.5933	54.207	33.0348	56.7775	31.0479	29.3383	18.9092	23.8158	24.5067	18.0711	26.8944	14.3646	13.6922	26.4077	10.9262	25.8438	30.3861	24.3766	20.6896	23.3714	13.1261	22.6774	14.843	28.7382	17.0506	17.6424	35.5694
AC009502.1	0	0	0	0	0	0	0	7.295	0	14.3352	0	13.1064	0	0	0	0	0	0	0	0	0	0	0	0	0	0	0	0	0	0	0	0	1.921	0	0	0	0	0	0	0	0	0	0	0	0	0	0	3.0683	0
AC009502.4	0	2.9088	0.9374	0	1.4033	0	0	20.8429	0	57.3407	23.026	33.8583	0	0	0	1.1239	0	0	1.0172	0	2.0915	0.8836	0	0	1.2706	1.2904	0	1.2756	2.4664	0	0	8.56	0.9605	0	0	0	0	0	0	0	0	2.3371	0	0.782	0.8731	1.5966	0	3.8353	0
AC009505.2	35.8565	11.6351	17.8097	27.8037	15.4367	34.7813	2.8817	10.4215	27.0516	48.3812	33.8617	29.4895	25.0316	23.7508	38.8701	33.7179	34.2867	11.4961	28.483	10.8045	27.1895	37.1125	16.86	45.0194	24.1408	47.7448	21.003	26.7871	23.0199	24.8984	11.7995	17.12	26.8944	22.345	20.5383	16.3106	11.9195	13.3675	19.5339	20.4449	8.9955	17.9181	17.814	18.7675	17.4623	35.1245	24.5529	17.6424	0
AC009505.4	10.2447	8.7263	1.8747	5.5607	8.42	4.9688	0	2.0843	0.9661	8.9595	5.4179	0	2.2756	1.3195	0.9967	3.3718	1.3187	1.5328	4.069	1.8008	1.0457	3.5345	3.7467	2.7563	3.8117	3.8712	1.8263	3.8267	2.4664	4.3302	5.4459	0.9511	0.9605	0.798	3.9121	0.7767	0	0	0	1.5727	2.6986	0.779	0	0.782	0	0	0	0	0
AC009506.1	51.2236	52.3578	46.8676	55.6073	57.537	59.625	77.8064	44.8123	67.6291	78.8435	65.0145	57.8868	72.8191	30.3482	50.8301	52.8247	72.5296	79.7065	46.7934	77.4324	35.5555	41.5306	42.15	56.0445	43.1993	52.9063	43.8324	51.0231	44.3956	56.292	63.5359	50.4089	57.6309	50.2762	50.8567	47.3785	46.6846	71.2931	59.687	37.7444	41.3792	52.9752	31.8777	51.6106	73.3417	84.6181	65.4743	55.9956	563.182
AC009506.2	2.5612	0	9.3735	30.028	2.8067	23.6016	2.8817	0	13.5258	0	0	19.6597	17.067	7.9169	18.9367	12.3632	6.5936	7.6641	0	9.0038	9.4117	7.9527	7.4933	19.294	0	24.5176	4.5659	20.4093	13.9764	0	0	5.7067	12.4867	0.798	10.7582	3.1068	3.9732	11.5851	10.3096	10.2224	11.6941	10.1276	0	4.6919	1.7462	16.764	10.9124	2.3012	0
AC009508.1	0	0	0	0	0	0	0	0	0	0	0	0	0	0	0	0	0	0	0	0	0	0	0	0	0	0	0	0	0	0	0	0	0	0	0	0	0	0	0	0	0	0	0	0	0	0	0	0	0
AC009517.2	0	0	0	0	0	0	0	0	0	1.7919	1.3545	0	0	0	0	0	0	0	0	0	0	0	0	0	0	0	0	0	0	0	0	0	0	0	0	0	0	0	0	0	0	0	0	0	0	0	0	0	0
AC009518.2	0	0	0	0	0	0	0	0	0	0	0	0	0	0	0	0	0	0	0	0	0	0	0	0	0	0	0	2.5512	0	0	0.9077	0	0	0	0	0	0	0	1.0852	0	0	0	0	0	0	0	0	0	0
AC009518.3	0	0	0	0	0	0	0	0	0	0	0	0	0	0	0	0	0	0	0	0	0	0	0	0	0	0	0	0	0	0	0	0	0	0	0	0	0	0	0	0	0	0	0	0	0	0	0	0	0
AC009518.4	0	0	0	0	0	1.2422	2.8817	0	0	0	0	0	0	0	0	0	0	0	0	0.9004	0	0	0	0	0	0	0.9132	0	0	0	0	0	0	0	0	0	0	0	0	0	0	0	0	0	0	0	0	0.7671	0
AC009518.8	19.2088	29.0877	4.6868	14.4579	16.8401	50.9297	5.7634	29.1801	14.492	16.1271	9.4813	32.7661	14.7914	19.7923	7.9733	10.1154	17.1434	3.832	14.2415	3.6015	14.6405	10.6036	10.3033	9.1876	20.3291	12.904	9.1317	21.6848	12.3321	7.5778	5.4459	13.3156	8.6446	5.5862	7.8241	9.3204	5.9597	3.5647	3.7983	3.1454	17.0914	8.5695	19.6892	5.4739	4.3656	3.1931	3.4101	6.1365	0
AC009531.2	0	0	0	0	0	0	0	0	0	0	0	0	0	0	0	0	0	0	0	0	0	0	0	0	0	0	0	0	0	0	0	0	0	0	0	0	0	0	0	0	0	0	0	0	0	0	0	0	0
AC009541.1	1.2806	0	0	0	0	0	0	3.1264	0	0	9.4813	0	0	0	0	0	0	0	0	0	0	0	0	0	0	0	0	0	0	1.0825	0	0	0.9605	0	0	0	0	0	0	0	0	0	0.9376	0	0	0	0	0	0
AC009542.2	75.5548	197.796	70.3014	62.2802	95.4271	98.1329	23.0537	15.6322	66.663	16.1271	266.83	33.8583	68.2679	46.1821	61.7935	47.2051	151.653	66.6775	65.1039	55.8234	64.8364	53.0178	71.1866	65.2321	71.1518	139.363	88.578	99.4951	30.4192	47.6317	43.5675	100.818	18.2498	15.9607	53.7908	38.8349	61.584	36.5377	40.1531	38.5307	39.5801	34.278	115.322	53.9565	18.3354	15.9657	34.7832	80.5416	5.9282
AC009677.1	0	0	0	0	0	0	0	0	0	0	0	0	0	0	0	0	0	0	0	0	0	0	0	0	0	0	0	0	0	0	0	0	0	0	0	0	0	0	0	0	0	0	0	0	0	0	0	0	0
AC009695.1	0	0	0	0	0	0	0	0	0	0	0	0	0	0	0	0	0	0	0	0	0	0	0	0	0	0	0	0	0	0	0	0	0	0	0	0	0	0	0	0	0	0	0	0	0	0	0	0	0
AC009784.1	0	0	0	0	0	0	0	0	0	0	0	0	0	0	0	0	0	0	0	0	0	0	0	0	0	0	0	0	0	0	0	0	0	0	0	0	0	0	0	0	0	0	0	0	0	0	0	0	0
AC009784.3	0	0	0	0	0	0	0	52.1074	0.9661	1.7919	28.4438	1.0922	0	1.3195	0	0	0	0.7664	1.0172	0	0	0.8836	0	0	0	0	0	0	3.2886	0	0	0	0	0	0	0	0	0	0.5426	0	0.8995	0	0.9376	0	0	0	0	0	0
AC009784.4	0	0	0	0	0	0	0	7.295	0	0	1.3545	0	0	0	0	0	0	0	0	0	0	0	0	0	0	0	0	0	0	0	0.9077	0	0	0	0	0	0	0	0	0	0	0	0	0	0	0	0	0	0
AC009800.1	0	0	0	0	0	0	0	0	0	0	0	0	0	0	0	0	0	0	0	0	0	0	0	0	0	0	0	0	0	0	0	0	0	0	0	0	0	0	0	0	0	0	0	0	0	0	0	0	0
AC009831.1	0	0	0	0	0	0	0	0	0	0	0	0	0	0	0	0	0	0	0	0	0	0	0	0	0	0	0	0	0	0	0	0	0	0	0	0	0	0	0	0	0	0	0	0	0	0	0	0	0
AC009835.1	0	0	0	0	0	0	0	0	0	0	0	0	0	0	0	0	0	0	0	0	0	0	0	0	0	0	0	0	0	0	0	0	0	0	0	0	0	0	0	0	0	0	0	0	0	0	0	0	0
AC009878.2	0	0	0.9374	0	0	0	0	1.0421	0.9661	435.431	0	84.0997	0	0	0	0	0	0	0	0	1.0457	0	0	0	0	0	0	0	0	0	0	0	15.3682	0	0	0	0	0	0	0	0	0	0	0	0	0	0	0	0
AC009892.10	0	2.9088	0	0	7.0167	0	2.8817	0	0	5.3757	1.3545	3.2766	0	0	0	0	0	0	0	0	0	0	0	0	0	0	0	0	0	0	0	0	0	0	0	0	0	0	0	0	0	0	0	0	0	0	0	0	0
AC009892.2	0	0	0	0	0	0	0	0	0	0	0	0	0	0	0	0	0	0	0	0	0	0	0	0	0	0	0	0	0	0	0	0	0	0	0	0	0	0	0	0	0	0	0	0	0	0	0	0	0
AC009892.5	0	0	0	0	0	0	0	0	0	0	0	0	0	0	0	0	0	0	0	0	0	0	0	0	0	0	0	0	0	0	0	0	0	0	0	0	0	0	0	0	0	0	0	0	0	0	0	0	0
AC009892.9	0	0	0	0	0	0	0	0	0	0	0	0	0	0	0	0	0	0	0	0	0	0	0	0	0	0	0	0	0	0	0	0	0	0	0	0	0	0	0	0	0	0	0	0	0	0	0	0	0
AC009941.1	0	0	0	0	0	0	0	0	0	0	0	0	0	0	0	0	0	0	0	0	0	0	0	0	0	0	0	0	0	0	0	0	0	0	0	0	0	0	0	0	0	0	0	0	0	0	0	0	0
AC009945.4	0	0	0	0	0	0	2.8817	0	0	0	1.3545	0	0	0	0.9967	0	0	0	0	0	0	0	0	0	0	0	0	0	0	0	0	0	0	0	0	0	0	0	0	0	0	0	0.9376	0	0	0	0	0	0
AC009947.2	0	0	0	0	0	0	0	0	0	0	0	0	0	0	0	0	0	0	0	0	0	0	0	0	0	0	0	0	0	0	0	0	0	0	0	0	0	0	0	0	0	0	0	0	0	0	0	0	0
AC009947.5	0	0	0	0	0	0	0	0	0	0	0	0	0	0	0	0	0	0	0	0	0	0	0	0	0	0	0	0	0	0	0	0	0	0	0	0.7767	0	0	0.5426	0	0	0	0	0	0	0	0	0	0
AC009948.5	258.679	122.168	113.419	92.3082	103.847	209.93	54.7526	199.05	132.36	166.647	165.245	162.738	119.469	126.671	172.424	171.961	237.37	57.4806	111.897	45.9192	127.581	93.6649	69.3133	161.702	148.656	221.949	121.452	135.211	104.412	124.492	142.502	140.764	159.446	102.947	108.56	123.495	111.249	86.4429	92.2435	125.815	107.946	179.181	103.134	127.463	103.028	93.3992	98.2114	145.742	5.9282
AC009948.7	0	2.9088	7.4988	6.6729	2.8067	3.7266	5.7634	7.295	9.6613	0	4.0634	7.6454	12.5158	2.639	7.9733	10.1154	0	17.6274	3.0517	18.0075	12.549	3.5345	3.7467	7.3501	0	3.8712	5.479	3.8267	8.2214	2.1651	0	3.8044	5.7631	3.9902	3.9121	3.1068	3.9732	11.5851	8.6817	7.8634	0.8995	4.6743	0.9376	7.0378	3.4925	8.7811	6.1382	4.6024	11.8565
AC009950.2	47.3818	34.9052	56.2411	53.3831	46.3102	42.2344	43.2258	31.2644	25.1194	69.884	23.026	39.3193	26.1694	42.2236	43.8534	64.064	75.167	32.1892	104.777	35.1147	30.3267	39.7634	34.6566	44.1006	29.2231	49.0352	28.3084	15.3069	18.9092	31.3936	26.322	35.1911	22.0918	29.5273	23.4723	33.398	20.8591	17.8233	31.4713	18.0859	26.0869	35.0571	13.1261	8.6018	9.6043	39.1159	24.5529	23.0119	29.6412
AC009955.8	0	0	0	2.2243	0	0	0	0	0	3.5838	0	0	0	0	0	0	0	0	0	0	0	0	0	0	0	0	0	0	0	0	0	0	0	0.798	0	0	0	0	0	0	0	0	0	0.782	0	0	0.682	0	0
AC009960.1	0	0	0	0	0	0	0	1.0421	0	0	2.7089	1.0922	0	0	2.99	2.2479	1.3187	0	0	0	0	0.8836	0	0.9188	2.5411	1.2904	0	0	0	1.0825	0	0	0	0	0	0	0	0	0.5426	3.1454	0	0	1.8752	0	0.8731	0	0.682	0.7671	0
AC009960.2	0	0	0.9374	0	1.4033	2.4844	0	0	0	0	1.3545	2.1844	0	0	1.9933	1.1239	0	0	2.0345	0.9004	0	0	1.8733	0	0	0	0.9132	1.2756	0	0	0	0	0	1.5961	0.978	0	0	1.7823	0.5426	1.5727	0	0.779	0	0	0	0	1.364	0.7671	0
AC009960.3	0	0	0.9374	0	2.8067	2.4844	0	0	0.9661	3.5838	1.3545	2.1844	0	1.3195	2.99	2.2479	0	0.7664	1.0172	1.8008	1.0457	0	2.81	1.8375	0	5.1616	0	1.2756	0	1.0825	0	0	0	1.5961	0	2.3301	1.9866	0	0.5426	0.7863	0	0	0.9376	0	0	0	0	1.5341	0
AC009960.4	1.2806	0	0	0	0	1.2422	0	0	0	0	1.3545	0	1.1378	2.639	0.9967	0	1.3187	1.5328	0	0	0	0	0	0.9188	1.2706	6.452	1.8263	0	0.8221	0	1.8153	0.9511	0	0	1.956	0	0	0	0.5426	2.359	0	0	1.8752	1.564	0	0	1.364	0	0
AC009960.5	0	0	0	0	0	0	0	2.0843	0	0	0	0	2.2756	0	0.9967	3.3718	0	2.2992	0	0.9004	0	1.7673	0	1.8375	0	0	0	2.5512	0	0	0	0	0.9605	0	0.978	0	0	0.8912	0	0.7863	0	0	0	0.782	0	0	1.364	0	0
AC009960.6	0	0	0	0	0	0	0	0	0	0	0	0	0	0	0	0	0	0	0	0	0	0	0	0	0	0	0	0	0	0	0	0	0	0	0	0	0	0	0	0	0	0	0	0.782	0	0	0	0.7671	0
AC009960.7	0	0	0	1.1121	0	0	0	1.0421	0	1.7919	0	0	1.1378	0	0	0	0	0	0	0	0	0	0.9367	0	0	0	0	0	0	0	0	0	0	0.798	0	0	0	0	0	0	0	0	0	1.564	0	0	0	0	0
AC009961.2	2.5612	0	2.8121	3.3364	4.21	4.9688	0	1.0421	7.729	0	1.3545	0	1.1378	2.639	0	2.2479	0	0.7664	0	0	4.183	7.069	0.9367	1.8375	3.8117	2.5808	5.479	3.8267	2.4664	3.2476	1.8153	1.9022	1.921	1.5961	0.978	0	2.9799	2.6735	3.2557	3.9317	0.8995	1.5581	0	6.2558	0.8731	0.7983	4.7742	0	0
AC009961.3	34.5759	58.1753	16.8723	30.028	19.6468	23.6016	17.2903	10.4215	32.8484	5.3757	31.1528	29.4895	20.4804	32.9872	37.8734	23.6025	34.2867	12.2625	24.414	18.0075	29.281	30.0434	21.5433	45.9381	25.4114	29.6792	23.7425	25.5116	26.3085	24.8984	30.8603	29.4845	19.2103	10.3745	18.5823	19.4174	24.8322	15.1498	14.6504	22.8039	21.5891	17.9181	14.0637	15.6396	11.3505	6.3863	10.9124	19.1766	17.7847
AC009961.5	0	0	0	0	0	0	0	0	0	0	0	0	0	0	0	0	0	0	0	0	0	0	0	0	0	0	0	0	0	1.0825	0	0	0	0	0	0	0	0	0	0	0	0	0	0	0	0	0	0	0
AC009963.3	5.1224	14.5438	0	0	12.6301	1.2422	0	1.0421	3.8645	3.5838	1.3545	3.2766	1.1378	6.5974	1.9933	1.1239	1.3187	2.2992	3.0517	0	2.0915	7.069	0	0.9188	0	6.452	0.9132	3.8267	0.8221	1.0825	0	0	0.9605	1.5961	1.956	0	0.9933	0	1.0852	0.7863	4.4977	0.779	0	0.782	0.8731	0.7983	0.682	1.5341	0
AC009963.4	0	0	0	0	0	0	0	0	0	0	0	0	0	0	0	0	0	0	0	0	0	0	0	0	0	0	0	0	0	0	0	0	0	0	0	0	0	0	0	0	0	0	0	0	0	0	0	0	0
AC009963.5	0	0	0	0	0	0	0	0	0	0	1.3545	0	0	0	0	2.2479	0	0	0	0	1.0457	0	0	0	0	0	0	0	0	0	0	0	0	0	0	0	0	0	0	0.7863	0	0	0.9376	0	0	0	0	0	0
AC009963.6	0	0	0	0	0	0	0	0	0	0	1.3545	0	0	0	0	0	0	0	0	0	0	0	0	0	0	0	0	0	0	0	0	0	0	0	0	0	0	0	0	0	0	0	0	0	0	0	0	0	0
AC009965.1	0	0	0	0	0	0	0	0	0	0	0	0	0	0	0	0	0	0	0	0	0	0	0	0	0	0	0	0	0	0	0	0	0	0	0	0	0	0	0	0	0	0	0	0	0	0	0	0	0
AC009965.2	0	0	0	0	0	0	0	0	0	0	0	0	0	0	0	0	0	0	0	0	0	0	0	0	0	0	0	0	0	0	0	0	0	0	0	0	0	0	0	0	0	0	0	0	0	0	0	0	0
AC009967.3	1.2806	11.6351	2.8121	1.1121	5.6134	0	0	4.1686	0	1.7919	1.3545	2.1844	1.1378	2.639	2.99	1.1239	0	0	2.0345	2.7011	2.0915	0	0	3.6751	0	0	0	0	0.8221	0	0.9077	0	0	2.3941	1.956	0.7767	0	0	0	0	0.8995	0	0	0	0.8731	0	0	0	0
AC009969.1	0	0	0	0	0	0	0	0	0	0	0	0	0	0	0	0	0	0	0	0	0	0	0	0	0	0	0	0	0	0	0	0	0	0	0	0	0	0	0	0	0	0	0	0	0	0	0	0	0
AC009970.1	0	0	6.5615	1.1121	1.4033	0	5.7634	0	1.9323	7.1676	0	2.1844	0	1.3195	2.99	0	3.9562	1.5328	5.0862	0	1.0457	2.6509	0.9367	0.9188	5.0823	0	0	0	0	5.4127	0	2.8533	0	0.798	2.934	1.5534	1.9866	0.8912	1.0852	0	2.6986	3.1162	1.8752	0.782	0	3.1931	0.682	0	0
AC009974.11	0	0	0	1.1121	0	0	0	0	0	0	0	0	0	0	0	0	0	0	1.0172	0	0	0	0	0	0	0	0	0	0	0	0	0	0	0	0	0	0	0	0	0	0	0	0	0	0	0	0	0	0
AC009987.1	0	0	0	0	0	0	0	0	0	0	0	0	0	0	0	0	0	0	0	0	0	0	0	0	0	0	0	0	0	0	0	0	0	0	0	0	0	0	0	0	0	0	0	0	0	0	0	0	0
AC010082.2	3.8418	0	1.8747	1.1121	0	0	0	1.0421	0	5.3757	2.7089	5.461	0	1.3195	2.99	2.2479	1.3187	0	4.069	0.9004	1.0457	0.8836	0	2.7563	2.5411	2.5808	0	3.8267	0	1.0825	5.4459	0	0	0	0	0	0	0	0	0	0	0	0	0.782	0	0.7983	0.682	0	0
AC010084.1	3.8418	0	4.6868	0	1.4033	1.2422	0	2.0843	0	0	6.7723	0	1.1378	5.278	0	6.7436	0	3.832	2.0345	0	0	0	0	13.7814	2.5411	0	3.6527	0	1.6443	6.4952	0	0	0	0	0	9.3204	4.9664	3.5647	2.1704	0	0	0.779	0	0	0	5.588	6.8202	0	0
AC010086.1	0	0	0	0	0	0	0	0	0	0	2.7089	0	0	0	0	0	0	0	1.0172	0	0	0	0	0.9188	0	0	0	0	0	0	0	0	0	0	0	0	0	0	0	0	0	0	0	0	0	0	0	0	0
AC010086.2	0	0	0	0	0	0	0	0	0	0	0	0	0	0	0	0	0	0	0	0	0	0	0	0	0	0	0	0	0	0	0	0	0	0	0	0	0	0	0	0	0	0	0	0	0	0	0	0	0
AC010086.5	0	0	0	0	0	0	0	0	0	0	0	0	0	0	0	0	0	0	0	0	0	0	0	0	0	0	0	0	0	0	0	0	0	0	0	0	0	0	0	0	0	0	0	0	0	0	0	0	0
AC010091.1	0	0	0	0	0	0	0	1.0421	0	0	1.3545	0	0	0	0	0	0	0	0	0.9004	0	0	0	0	0	0	0	0	2.4664	0	0	1.9022	0	0	0	0	0	0	0	0	0	0	0	6.2558	0	0	0	0	0
AC010092.1	0	0	0	0	0	0	0	0	0	0	0	0	0	0	0	0	0	0.7664	0	0	0	0	0	0	0	0	0	0	0	0	0	0	0	0	0	0	0	0	0	0	0	0	0	0	0	0	0	0	0
AC010095.5	51.2236	11.6351	5.6241	7.785	5.6134	2.4844	0	11.4636	1.9323	0	27.0894	4.3688	1.1378	7.9169	7.9733	5.6197	7.9123	6.8977	5.0862	7.203	3.1372	4.4182	4.6833	1.8375	0	2.5808	4.5659	2.5512	2.4664	2.1651	0.9077	2.8533	0.9605	0.798	1.956	0.7767	0	1.7823	5.9687	1.5727	1.7991	0.779	0.9376	0.782	1.7462	4.7897	0.682	0	0
AC010095.6	0	0	0	0	1.4033	0	0	0	0	0	0	0	0	0	0	0	0	0	0	0	0	0	0	0	0	0	0	0	0	0	0	0	0	0	0	0	0	0	0	0	0	0	0	0	0	0	0	0	0
AC010095.7	0	0	0	0	0	0	5.7634	0	0.9661	0	0	0	0	0	0	0	0	0	1.0172	0	0	0	0	0	0	0	0	0	0	0	0	0	0	0	0	0	0	0	0	0	0	0	0	0	0	0.7983	0	0	0
AC010096.1	1.2806	2.9088	0.9374	1.1121	0	7.4531	2.8817	1.0421	1.9323	0	1.3545	0	1.1378	0	2.99	1.1239	0	3.0656	0	0	0	5.3018	0.9367	0.9188	0	3.8712	1.8263	2.5512	0.8221	1.0825	0	0	0	0	0	0	2.9799	0	1.0852	0.7863	0	0	0	0	0	0	0	0.7671	5.9282
AC010096.2	2.5612	0	0.9374	0	2.8067	12.4219	0	1.0421	1.9323	0	0	3.2766	4.5512	1.3195	0.9967	1.1239	0	2.2992	0	1.8008	1.0457	0.8836	0.9367	1.8375	0	18.0656	1.8263	2.5512	0	0	0.9077	0.9511	0	0.798	0.978	0.7767	1.9866	0	1.0852	2.359	0.8995	2.3371	0	0.782	0	0	1.364	1.5341	0
AC010105.1	0	0	0	0	0	0	0	0	0	0	0	0	0	0	0.9967	0	0	0	0	0	0	0	0	0	0	0	0	1.2756	0	0	0	0	0	0	0	0	0	0	0	0	0	0	0	0	0	0	0.682	0	0
AC010127.3	10.2447	0	0	0	11.2267	18.6328	8.6452	6.2529	6.7629	1.7919	5.4179	9.8298	2.2756	3.9585	4.9833	61.8162	61.9798	0.7664	5.0862	7.203	1.0457	5.3018	5.62	10.1064	3.8117	38.712	2.7395	8.929	3.2886	1.0825	0	13.3156	0	7.9803	5.8681	2.3301	5.9597	0.8912	10.3096	0.7863	2.6986	3.1162	12.1885	2.3459	4.3656	7.1846	52.5158	1.5341	0
AC010132.10	0	0	0	0	0	0	0	0	0	0	0	0	0	0	0	0	0	0	0	0	0	0	0	0	0	0	0	0	0	0	0	0	0	0	0	0	0	0	0	0	0	0	0	0	0	0	0	0	0
AC010132.11	17.9283	31.9964	8.4362	5.5607	0	16.1484	0	0	9.6613	0	0	16.3831	2.2756	6.5974	5.98	0	29.0118	0	5.0862	0	0	0	6.5567	2.7563	15.2468	11.6136	9.1317	0	9.0435	2.1651	3.6306	0.9511	0	1.5961	11.7362	0.7767	5.9597	0	0	1.5727	0	4.6743	15.0013	3.9099	0	0	0.682	0	0
AC010136.2	3.8418	0	0	0	0	4.9688	0	1.0421	2.8984	1.7919	0	3.2766	4.5512	2.639	7.9733	2.2479	2.6374	9.9633	0	5.4023	0	1.7673	1.8733	2.7563	2.5411	10.3232	5.479	2.5512	0.8221	2.1651	0	2.8533	0.9605	2.3941	0	1.5534	0	1.7823	1.6278	3.9317	0	0.779	3.7503	3.9099	1.7462	0.7983	1.364	0.7671	5.9282
AC010139.1	0	0	0	0	0	0	0	0	0	0	0	0	0	0	0	0	0	0	0	0	0	0	0	0	0	0	0	0	0	0	0	0	0	0	0	0	0	0	0	0	0	0	0	0	0	0	0	0	0
AC010141.4	0	0	0	0	0	0	0	0	0	0	0	0	0	0	0	0	0	0	0	0	0	0	0	0	0	0	0.9132	0	0	0	0	0	0	0	0	0.7767	0	0	0.5426	0	0	0	0	0	0	0.7983	0	0	0
AC010141.6	0	0	0	0	0	0	0	0	0	0	0	0	0	0	0	0	0	0	0	0	0	0	0	0	0	0	0	0	0	0	0	0	0	0	0	3.1068	0	0	0	0	0	0	0	0	0	0	0	0	0
AC010145.4	0	0	0	0	0	0	0	0	0	0	0	0	0	0	0	0	0	0	0	0	0	0	0	0	0	0	0	0	0	0	0	0	0	0	0	0	0	0	0	0	0	0	0	0	0	0	0	0	0
AC010146.1	0	0	0	0	0	0	0	1.0421	0	0	0	0	0	0	0	0	0	0	0	0	0	0	0	0	0	0	0	0	0	0	0	0	0	0	0	0	0	0	0	0	0	0	0	0	0	0	0	0	0
AC010146.2	0	0	0	0	0	0	0	0	0	0	0	0	0	0	0	0	0	0	0	0	0	0	0	0	0	0	0	0	0	0	0	0	0	0	0	0	0	0	0	0	0	0	0	0	0	0	0	0	0
AC010148.1	10.2447	186.161	2.8121	6.6729	2.8067	19.875	0	2.0843	6.7629	12.5433	13.5447	2.1844	26.1694	9.2364	15.9467	15.735	1.3187	9.1969	0	1.8008	1.0457	13.2545	7.4933	9.1876	2.5411	27.0984	9.1317	16.5825	10.6878	14.073	6.3536	37.0934	5.7631	0	5.8681	1.5534	29.7987	0.8912	1.0852	51.1122	3.5982	7.7905	5.6255	12.5117	1.7462	4.7897	5.4562	18.4095	5.9282
AC010149.4	2.5612	0	0.9374	0	0	0	0	0	0	0	0	0	0	1.3195	0	0	0	0	0	0	0	0	0	0	0	0	0	0	0	0	0	1.9022	0	0	0	0	0	0	0	0	0	0	0	0	0	0	0	0	0
AC010150.1	14.0865	14.5438	11.2482	8.8972	15.4367	7.4531	14.4086	7.295	8.6952	5.3757	0	14.1987	9.1024	2.639	2.99	8.9914	10.5498	7.6641	24.414	9.9041	14.6405	10.6036	12.1767	7.3501	11.4351	11.6136	6.3922	3.8267	4.1107	4.3302	3.6306	9.5111	3.8421	4.7882	3.9121	12.4272	7.9463	5.347	7.5965	8.6498	5.3973	8.5695	4.6879	3.1279	1.7462	7.9828	6.8202	7.6706	0
AC010150.2	0	0	0	0	0	0	0	0	0	0	0	0	0	0	0	0	0	0	0	0	0	0	0	0	0	0	0	0	0	0	0	0	0	0	0	0	0	0	0	0	0	0	0	0	0	0	0	0	0
AC010153.3	1.2806	0	0	0	0	0	0	0	0	0	0	0	0	1.3195	0	0	0	0	13.2242	1.8008	0	0	0	0	0	0	0	0	0	1.0825	0	0	0	0	0	0	0.9933	0	0	0	0	0.779	0	0	0	0	13.6405	0	0
AC010154.2	0	0	0	0	0	0	0	0	0	0	0	0	0	0	0	0	0	0	0	0	0	0	0	0	0	0	0	0	0	0	0	0	0	0	0	0	0	0	0	0	0	0	0	0	0	0	0	0	0
AC010196.1	0	0	0	0	0	0	0	0	0	0	0	0	0	0	0	0	0	0	0	0	0	0	0	0	0	0	0	0	0	0	0	0	0	0	0	0	0	0	0	0	0	0	0	0	0	0	0	0	0
AC010203.1	0	0	0	0	0	0	0	0	0	0	0	0	0	0	0	0	0	0	0	0	0	0	0	0	0	0	0	0	0	0	0	0	0	0	0	0	0	0	0	0	0	0	0	0	0	0	0	0	0
AC010207.1	0	0	0	0	0	0	0	0	0	0	0	0	0	0	0	0	0	0	0	0	0	0	0	0	0	0	0	0	0	0	0	0	0	0	0	0	0	0	0	0	0	0	0	0	0	0	0	0	0
AC010209.1	0	0	0	0	0	0	0	0	0	0	0	0	0	0	0	0	0	0	0	0	0	0	0	0	0	0	0	0	0	0	0	0	0	0	0	0	0	0	0	0	0	0	0	0	0	0	0	0	0
AC010226.4	7.6835	14.5438	9.3735	24.4672	16.8401	16.1484	23.0537	26.0537	10.6274	39.4218	6.7723	26.2129	13.6536	11.8754	20.93	15.735	15.8246	15.3282	15.2587	13.5057	14.6405	14.1381	18.7333	16.5377	27.9525	16.7752	16.4371	19.1337	14.7985	12.9905	10.8919	13.3156	14.4077	20.7489	24.4504	9.3204	13.9061	19.6056	26.0452	17.2995	12.5937	14.8019	13.1261	23.4594	24.4472	41.5108	12.2764	33.7508	82.9952
AC010235.1	0	0	0	0	0	0	0	0	0	0	0	0	0	0	0	0	0	0	0	0	0	0	0	0	0	0	0	0	0	0	0	0	0	0	0	0	0	0	0	0	0	0	0	0	0	0	0	0	0
AC010240.2	412.35	308.329	66.5519	87.8596	124.897	168.938	43.2258	112.552	76.3243	87.803	216.715	113.589	124.02	100.281	100.663	103.402	319.13	52.8822	79.3454	76.532	85.7514	82.1777	88.9832	125.871	121.975	198.721	83.0989	48.472	46.0399	60.6221	78.966	73.2356	77.8017	37.5076	61.6149	51.262	72.5102	33.8642	52.0905	49.5395	65.6669	75.5675	83.4446	17.9855	46.2751	32.7296	64.1102	55.9956	0
AC010240.3	0	0	0	0	0	0	0	1.0421	0	0	0	2.1844	0	0	0	0	0	0.7664	0	0	0	0	0	0	0	0	0	0	0	0	0	0	0	0.798	0	0	0	0.8912	0.5426	0	0	0	0	0	0	0	0	0	0
AC010295.1	0	0	0	0	0	0	0	0	0	0	0	0	0	0	0	0	0	0	0	0	0	0	0	0	0	0	0	0	0	0	0	0	0	0	0	0	0	0	0	0	0	0	0	0	0	0	0	0	0
AC010297.1	0	0	0	0	0	0	0	0	0	0	0	0	0	0	0	0	0	0	0	0	0	0	0	0	0	0	0	0	0	0	0	0	0	0	0	0	0	0	0	0	0	0	0	0	0	0	0	0	0
AC010311.1	0	0	0	0	0	0	0	0	0	0	0	0	0	0	0	0	0	0	0	0	0	0	0	0	0	0	0	0	0	0	0	0	0	0	0	0	0	0	0	0	0	0	0	0	0	0	0	0	0
AC010319.1	0	0	0	0	0	0	0	0	0	0	0	0	0	0	0	0	0	0	0	0	0	0	0	0	0	0	0	0	0	0	0	0	0	0	0	0	0	0	0	0	0	0	0	0	0	0	0	0	0
AC010323.1	0	0	0	0	0	0	0	0	0	0	0	0	0	0	0	0	0	0	0	0	0	0	0	0	0	0	0	0	0	0	0	0	0	0	0	0	0	0	0	0	0	0	0	0	0	0	0	0	0
AC010329.1	0	0	0	0	0	0	0	0	0	0	0	0	0	0	0	0	0	0	0	0.9004	0	0	0	0	0	0	0	0	0	0	0	0	0	0	0	0	0	0	0	0	0	0	0	0	0	0.7983	0	0	0
AC010376.1	0	0	0	0	0	0	0	0	0	0	0	0	0	0	0	0	0	0	0	0	0	0	0	0	0	0	0	0	0	0	0	0	0	0	0	0	0	0	0	0	0	0	0	0	0	0	0	0	0
AC010423.1	0	0	0	1.1121	0	0	0	0	0	0	0	0	0	0	0	0	0	0	0	0	0	0.8836	1.8733	0	0	0	0	0	0.8221	0	0	0.9511	0	0	0	0.7767	0.9933	0	1.0852	0	2.6986	0	0	0	0	1.5966	0	0	0
AC010455.1	0	0	0	0	0	0	0	0	0	0	0	0	0	0	0	0	0	0	0	0	0	0	0	0	0	0	0	0	0	0	0	0	0	0	0	0	0	0	0	0	0	0	0	0	0	0	0	0	0
AC010458.1	0	0	0	0	0	0	0	0	0	0	0	0	0	0	0	0	0	0	0	0	0	0	0	0	0	0	0	0	0	0	0	0.9511	0	0	0	0	0	0	0	0	0	0	0	0	0	0	0	0	0
AC010468.1	46.1012	37.814	78.7375	35.5887	37.8902	50.9297	28.8172	48.9809	22.221	51.965	123.257	31.6739	63.7167	42.2236	34.8834	19.1068	13.1872	37.554	63.0694	5.4023	61.6992	56.5524	13.1133	39.5068	15.2468	24.5176	50.2246	28.0627	41.107	56.292	21.7837	16.1689	30.7365	47.0841	61.6149	34.9514	5.9597	16.041	22.247	23.5902	10.7946	34.278	162.201	28.1512	21.8279	15.1674	16.3686	32.9837	0
AC010468.2	16.6477	0	2.8121	2.2243	2.8067	3.7266	0	2.0843	0	3.5838	5.4179	2.1844	1.1378	7.9169	4.9833	0	0	0.7664	5.0862	3.6015	2.0915	6.1854	0.9367	6.4313	3.8117	2.5808	0.9132	1.2756	4.1107	2.1651	3.6306	2.8533	0.9605	1.5961	1.956	3.1068	0.9933	0.8912	1.0852	0.7863	0.8995	1.5581	2.8127	0	0	2.3949	2.0461	0	0
AC010468.3	0	0	0	0	0	0	0	0	0	0	0	0	0	0	0	0	0	0	0	0	0	0	0	0	0	0	0	0	0	0	0	0	0	0	0	0	0	0	0	0	0	0	0	0	0	0	0	0	0
AC010492.2	2.5612	0	1.8747	0	0	0	0	0	0.9661	0	1.3545	0	1.1378	0	0	0	0	0.7664	2.0345	1.8008	0	0	0	0	1.2706	2.5808	0.9132	0	0.8221	1.0825	0	0	2.8815	0	0	0.7767	0	0	1.6278	0	0	0.779	0	0	0	3.1931	0	0.7671	0
AC010492.4	0	0	0	0	0	0	0	0	0	0	0	0	0	0	0	0	0	0	0	0	0	0	0	0	0	0	0	0	0	0	0	0	0	0	0	0	0	0	0	0	0	0	0	0	0	0	0	0	0
AC010492.5	0	0	0	0	0	0	0	0	0	0	0	0	0	0	0	0	0	0	0	0	0	0	0	0	0	0	0	0	0	0	0	0	0	0	0	0	0	0	0	0	0.8995	0	2.8127	0	0	0	0	0	0
AC010504.2	2.5612	8.7263	0.9374	2.2243	11.2267	7.4531	5.7634	6.2529	4.8307	7.1676	2.7089	10.922	3.4134	3.9585	3.9867	7.8675	3.9562	1.5328	3.0517	2.7011	2.0915	3.5345	7.4933	2.7563	1.2706	5.1616	7.3054	3.8267	4.9328	1.0825	2.723	2.8533	4.8026	3.1921	4.8901	4.6602	5.9597	1.7823	3.2557	2.359	5.3973	3.8952	5.6255	1.564	5.2387	5.588	2.7281	0.7671	0
AC010518.2	0	0	0	0	0	0	0	0	0	0	0	0	0	0	0	0	0	0	0	0	0	0	0	0	0	0	0	0	0	0	0	0	0	0	0	0	0	0	0	0	0	0	0	0	0	0	0	0	0
AC010518.3	0	0	0	0	0	0	0	0	0	0	0	0	0	0	0	0	0	0	0	0	0	0	0	0	0	0	0	0	0	0	0	0	0	0	0	0	0	0	0	0	0	0	0	0	0	0	0	0	0
AC010522.1	34.5759	26.1789	23.4338	15.5701	23.8568	21.1172	8.6452	5.2107	10.6274	32.2542	12.1902	12.0142	22.756	26.3898	9.9667	23.6025	13.1872	12.2625	16.276	9.9041	9.4117	13.2545	5.62	13.7814	12.7057	18.0656	9.1317	11.4802	5.755	10.8254	4.5383	4.7556	3.8421	8.7784	9.7801	4.6602	5.9597	13.3675	16.2783	9.4361	4.4977	4.6743	5.6255	3.9099	6.1118	3.9914	4.0921	7.6706	0
AC010524.2	3.8418	0	1.8747	1.1121	1.4033	1.2422	8.6452	4.1686	1.9323	0	1.3545	6.5532	0	0	2.99	3.3718	5.2749	1.5328	1.0172	7.203	0	0.8836	1.8733	6.4313	1.2706	2.5808	0.9132	11.4802	4.9328	4.3302	1.8153	1.9022	4.8026	0	1.956	8.5437	0.9933	1.7823	4.3409	2.359	7.1964	6.2324	0	1.564	2.6193	2.3949	5.4562	6.1365	0
AC010524.4	6.4029	0	1.8747	1.1121	2.8067	4.9688	2.8817	5.2107	0.9661	7.1676	2.7089	5.461	1.1378	2.639	0.9967	3.3718	1.3187	1.5328	1.0172	1.8008	2.0915	5.3018	2.81	1.8375	3.8117	1.2904	3.6527	5.1023	1.6443	3.2476	5.4459	3.8044	0.9605	2.3941	1.956	3.1068	0	1.7823	6.5113	1.5727	2.6986	0.779	0	6.2558	0.8731	3.9914	2.7281	0	0
AC010525.1	0	0	0	0	0	0	0	0	0	0	0	0	0	0	0	0	0	0	0	0	0	0	0	0	0	0	0	0	0	0	0	0	0	0	0	0	0	0	0	0	0	0	0	0	2.6193	0	0	0	0
AC010525.4	2.5612	14.5438	9.3735	13.3458	7.0167	4.9688	0	6.2529	5.7968	7.1676	1.3545	7.6454	6.8268	7.9169	7.9733	6.7436	6.5936	6.1313	7.1207	9.9041	8.366	4.4182	7.4933	4.5938	1.2706	6.452	4.5659	6.3779	0	6.4952	1.8153	9.5111	1.921	1.5961	1.956	1.5534	3.9732	7.1293	7.0539	3.9317	4.4977	3.1162	0.9376	1.564	1.7462	3.9914	2.0461	1.5341	11.8565
AC010525.5	0	0	0	0	0	0	0	0	0	0	0	0	0	0	0	0	0	0	0	0	0	0	0	0.9188	0	0	2.7395	0	0	0	0	0	0	0	1.956	0	0	0	0	0	0	0	1.8752	0	0	0	0	0.7671	0
AC010528.1	0	0	0	0	0	0	0	0	0	0	0	0	0	0	0	0	0	0	0	0	0	0	0	0	0	0	0	0	0	0	0	0	0	0	0	0	0	0	0	0	0	0	0	0	0	0	0	0	0
AC010543.1	0	0	0	0	0	0	0	0	0	0	0	0	0	0	0	0	0	0	0	0	0	0	0	0	0	0	0	0	0	0	0	0	0	0	0	0	0	0	0	0	0	0	0	0	0	0	0	0	0
AC010546.1	0	0	0	0	0	0	0	0	0	0	0	0	0	0	0	0	0	0	0	0	0	0	0	0	0	0	0	0	0	0	0	0	0	0	0	0	0	0	0	0	0	0	0	0	0	0	0	0	0
AC010547.9	20.4894	0	14.0603	17.7944	29.4701	48.4453	0	32.3066	40.5775	34.0461	10.8357	18.5675	23.8938	81.8083	52.8234	25.8504	61.9798	26.8243	20.345	5.4023	12.549	24.7417	46.8333	24.8066	50.8227	68.3911	49.3114	36.9918	22.1978	22.7333	61.7206	41.8489	34.5785	8.7784	31.2965	9.3204	17.8792	32.9731	30.3861	29.881	32.3837	22.5923	51.5669	46.1367	34.9246	16.764	37.5113	26.8472	0
AC010609.1	0	0	0	0	0	0	0	0	0	0	0	0	0	0	0	0	0	0	1.0172	0	0	0	0	0	0	0	0	0	0	0	0	0	0	0	0	0	0	0	0	0	0	0	0	0	0	0	0	0	0
AC010641.1	0	0	2.8121	0	8.42	0	0	2.0843	0.9661	1.7919	0	1.0922	0	0	0	0	0	0	0	0	0	0	0	0	0	0	0	0	4.1107	0	0	0	0	3.1921	0	0	0	0	0	0	0	0	0	0	0	0	0	2.3012	0
AC010642.1	106.289	63.9928	77.8002	122.336	79.9904	109.312	138.322	88.5825	140.089	123.641	50.1153	76.4543	71.6813	163.617	110.63	77.5512	160.884	85.8377	107.828	94.5396	71.1109	92.7812	91.7932	124.033	99.1043	77.4239	66.6618	94.3928	147.985	54.1269	56.2746	64.6756	89.3279	88.5819	62.5929	46.6018	83.4364	121.198	84.1044	62.121	71.0642	40.5104	25.3146	145.448	53.2601	106.97	72.2945	44.4896	5.9282
AC010642.2	7.6835	11.6351	4.6868	5.5607	8.42	13.6641	17.2903	5.2107	9.6613	17.919	1.3545	9.8298	10.2402	9.2364	7.9733	2.2479	19.7808	5.3649	5.0862	3.6015	10.4575	6.1854	0.9367	5.5126	1.2706	7.7424	3.6527	6.3779	2.4664	9.7428	6.3536	3.8044	3.8421	3.1921	3.9121	6.2136	5.9597	3.5647	7.0539	5.5044	2.6986	5.4533	1.8752	6.2558	3.4925	2.3949	7.5023	1.5341	0
AC010646.3	0	0	0	0	0	0	2.8817	1.0421	0	0	0	0	0	0	0	0	0	0	0	0	0	0	0	0	0	0	0	0	0	0	0	0	0	0	0	0	0	0	0	0	0	0	0	0	0	0	0	0	0
AC010649.1	0	0	2.8121	0	1.4033	0	0	0	0	0	0	0	0	0	0	0	0	0	1.0172	0	0	0	0	0	0	0	0	0	0	3.2476	0	0	1.921	0	0	0	0	0	0	0	0	0	0	0	0	0	0	0	0
AC010677.5	0	0	0	0	0	0	0	0	0	0	0	0	0	0	0	0	0	0	0	0	0	0	0	0	0	0	0	0	0	0	0	0	0	0	0	0	0	0	0	0	0	0	0	0	0	0	0	0	0
AC010723.1	0	0	0	0	0	0	0	0	0	0	0	0	0	0	0	0	0	0	0	0	0	0	0	0	0	0	0	0	0	0	0	0	0	0	0	0	0	0	0	0	0	0	0	0	0	0	0	0	0
AC010723.2	0	0	0	0	0	0	0	0	0	0	0	0	0	0	0	0	0	0	0	0	0	0	0	0	0	0	0	0	0	0	0	0	0	0	0	0	0	0	0	0	0	0	0	0	0	0	0	0	0
AC010729.1	0	0	0.9374	0	0	0	0	0	0	0	1.3545	0	0	0	0	0	0	0	1.0172	0	1.0457	0	0	0	0	0	0	0	0	0	0	1.9022	0	0	0	0	0	0	0	0	0	0	0.9376	0	0	0	0	0.7671	0
AC010729.2	0	0	0	0	0	0	0	0	0	0	0	0	0	0	0	0	0	0	2.0345	1.8008	0	0	0	0	0	0	0	0	0	0	0	0	0	0	0	0	0	0	0	0	0	0	0	0	0	0.7983	0	0	0
AC010729.3	0	0	0	0	0	0	0	0	0	0	0	0	0	0	0	0	0	0	0	0	0	0	0	0	0	0	0	0	0	0	0	0	0	0	0	0	0	0	0	0	0	0	0	0	0	0	0	0	0
AC010731.2	0	0	0.9374	0	0	0	0	0	0	3.5838	0	1.0922	0	1.3195	0	0	1.3187	0	0	0	0	0.8836	0.9367	1.8375	0	1.2904	0	0	0	0	0.9077	0.9511	0.9605	0.798	0.978	0	0	0	0	0	1.7991	0	0	0	0	0	0	0	0
AC010731.3	0	2.9088	0	0	0	0	0	0	0	0	0	0	0	0	0	0	0	0	0	0	0	0	0	0	0	0	0	0	0	0	0	0	0	0	0	0	0	0	0	0	0	0	0	0	0	0	0	0	0
AC010731.4	0	0	0	0	0	0	0	0	0	0	0	0	0	0	0	0	0	0	0	0	0	0	0	0	0	0	0	0	0.8221	0	0	0	0	0	0	0	0	0	0	0	0	0	0	0	0	0	0	0	0
AC010731.6	0	0	0	0	0	0	0	17.7165	0	0	2.7089	0	0	0	0	0	0	0	0	2.7011	0	0	0	0	0	0	0	1.2756	0	0	0	0	0	0	0	0	0	0	0	0	0	0	0	0	0	0	0	0	0
AC010733.5	48.6624	2.9088	21.5591	10.0093	8.42	18.6328	11.5269	10.4215	2.8984	0	31.1528	9.8298	9.1024	5.278	10.9634	5.6197	27.6931	10.7297	11.1897	10.8045	8.366	14.1381	9.3667	7.3501	12.7057	12.904	10.9581	6.3779	6.5771	9.7428	9.9842	2.8533	8.6446	4.7882	5.8681	7.767	10.9262	1.7823	10.3096	3.9317	8.9955	6.2324	4.6879	10.1657	7.858	3.1931	6.1382	9.2048	0
AC010739.1	0	2.9088	0	0	0	0	0	0	0	0	0	0	0	0	0	0	0	0	0	0	0	0	0	0	0	0	0	0	0	0	0	0	0	0	0	0	0	0	0	0	0	0	0	0	0	0	0	0	0
AC010740.1	1.2806	0	0	1.1121	1.4033	0	0	0	2.8984	0	0	1.0922	0	0	0	0	0	0.7664	2.0345	0	0	0	0	0	0	0	0	2.5512	0	1.0825	0	0	0	0	0	0	0	0	0	0.7863	0	0	0	0	0	0	0	0	0
AC010744.1	0	0	0	0	0	0	0	0	0	0	0	0	0	0	0	0	0	0	0	0	0	0	0	0	0	0	0	0	0	0	0	0	0	0	0	0	0	0	0	0	0	0	0	0	0	0	0	0	0
AC010745.1	0	0	0	0	0	0	0	0	0	0	0	0	0	0	0	0	0	0	0	0	0	0	0	0	0	0	0	0	0	0	0	0	0	0	0	0	0	0	0	0	0	0	0	0	0	0	0	0	0
AC010745.2	0	0	0	0	0	0	0	0	0	0	0	0	0	0	0	0	0	0	1.0172	0	0	0	0	0	0	0	0	0	0	0	0	0	0	0	0	0	1.9866	0	0	0.7863	0	0	0	0	0	0.7983	0	0	0
AC010745.3	0	0	0	0	0	0	0	0	0	0	0	0	0	0	0	0	0	0	0	0	0	0	0	0	0	0	0	0	0	0	0	0	0	0	0	0	0	0	0	0	0	0	0	0	0	0	0	0	0
AC010745.4	0	0	0	0	0	0	0	0	0	0	0	0	0	0	0	0	0	0	0	0	0	0	0	0	0	0	0.9132	0	0	0	0	0	0	0	0	0	0	0	0	0	0	0	0	0	0	0	0	0	0
AC010746.3	0	0	0	0	0	0	0	0	0	0	1.3545	1.0922	0	0	0	1.1239	0	0	0	0	0	0.8836	0	0	0	0	0	0	0	0	0	0	0	0	0.978	0	0	0	0	0	0	0	0	0	0	0	0	0	0
AC010747.2	0	0	1.8747	0	4.21	0	0	0	0	0	0	0	0	1.3195	0.9967	1.1239	0	0	3.0517	0.9004	1.0457	0	0	0.9188	0	0	0	0	0.8221	1.0825	0	0.9511	0	1.5961	0	0	0.9933	0	0	0.7863	0	0	7.5006	0	0.8731	0.7983	0	2.3012	0
AC010754.1	0	0	0	0	0	0	0	0	0	0	0	0	0	0	0	0	0	0	0	0	0	0	0	0	0	0	0	0	0	0	0	0	0	0	0	0	0	0	0	0	0	0	0	0	0	0	0	0	0
AC010761.10	15.3671	5.8175	0	0	0	0	0	9.3793	0	0	10.8357	2.1844	1.1378	0	2.99	0	0	0	2.0345	0	0	0	0	4.5938	0	0	0	0	3.2886	0	0	0	0	0	0.978	0	0	5.347	0	0	0	0	0	0	0	0	0	0	0
AC010761.13	52.5042	29.0877	17.8097	26.6915	26.6635	28.5703	14.4086	28.138	15.4581	41.2136	44.6975	36.0427	35.2717	23.7508	19.9334	23.6025	27.6931	13.7954	29.5002	16.2068	13.5947	21.2071	29.0366	24.8066	29.2231	33.5504	19.1767	10.2046	13.9764	14.073	12.7072	3.8044	9.6052	11.9705	17.6043	13.9805	12.9128	13.3675	10.3096	8.6498	8.0959	18.6971	28.1274	10.1657	12.2236	1.5966	13.6405	1.5341	11.8565
AC010761.14	0	0	0	0	0	0	0	0	0	1.7919	0	0	0	0	0	0	0	0	1.0172	0.9004	0	0	0	0	0	0	0	0	0	0	0	0	0	0	0	0	0	0	0	0	0	0	0	0	0	0	0	0	0
AC010761.6	0	5.8175	0	0	0	0	0	1.0421	0	0	0	0	0	0	0	0	0	0	0	0	0	0	0	1.8375	0	0	0	0	0	0	0	0	0	0	0	0	0	0	0	0	0	0	3.7503	0	0	0	0	0	0
AC010761.8	89.6413	29.0877	24.3711	25.5794	19.6468	19.875	14.4086	37.5173	18.3565	35.838	39.2796	28.3973	20.4804	25.0703	14.95	33.7179	44.8365	13.0289	29.5002	12.6053	14.6405	29.1598	34.6566	20.2128	24.1408	45.164	10.9581	24.236	17.2649	11.9079	19.9684	26.6311	26.8944	11.1725	15.6482	20.9708	23.839	17.8233	14.1078	17.2995	16.1918	18.6971	15.9388	10.1657	7.858	15.1674	13.6405	12.273	0
AC010761.9	48.6624	0	26.2458	11.1215	4.21	14.9063	11.5269	7.295	4.8307	10.7514	4.0634	21.8441	13.6536	5.278	0	15.735	21.0995	20.693	8.138	27.0113	4.183	7.9527	33.72	3.6751	10.1645	33.5504	15.524	26.7871	3.2886	6.4952	10.8919	17.12	0	0	3.9121	5.4369	6.953	8.0205	14.6504	5.5044	0	0	0	3.9099	1.7462	13.5708	21.1427	0	0
AC010872.1	0	0	0	0	0	0	0	2.0843	0	1.7919	0	0	0	0	0	0	0	0	2.0345	0	0	0.8836	0	0.9188	0	0	0	2.5512	1.6443	0	0	0	0	0	0	0.7767	0	0	0.5426	0	0	0	0	0	0	0	0	1.5341	0
AC010874.1	0	0	0	0	0	0	0	0	0	0	0	0	0	0	0	0	0	0	0	0	0	0	0	0	0	0	0	0	0	0	0	0	0	0	0	0	0	0	0	0	0	0	0	0	0	0	0	0	0
AC010878.3	2.5612	2.9088	1.8747	0	0	1.2422	0	3.1264	0.9661	1.7919	0	1.0922	1.1378	1.3195	0.9967	0	1.3187	0	1.0172	0.9004	0	0.8836	2.81	1.8375	0	1.2904	0	5.1023	0.8221	1.0825	0	3.8044	0.9605	3.9902	0	0.7767	0	0	1.0852	0	0.8995	2.3371	3.7503	0.782	0	0	0.682	0	0
AC010880.1	0	0	0	0	0	0	0	0	0	0	0	0	0	0	0	0	0	0	0	0	0	0	0	0	0	0	0	0	0	0	0	0	0	0	0	0	0	0	0	0	0	0	0	0	0	0	0	0	0
AC010883.5	2.5612	20.3614	5.6241	0	4.21	6.2109	0	3.1264	0.9661	0	5.4179	7.6454	4.5512	5.278	4.9833	1.1239	0	4.5985	6.1035	4.5019	4.183	2.6509	4.6833	5.5126	1.2706	5.1616	6.3922	1.2756	1.6443	8.6603	1.8153	2.8533	1.921	2.3941	2.934	0.7767	0.9933	2.6735	2.713	0.7863	1.7991	2.3371	7.5006	2.3459	5.2387	2.3949	2.0461	3.0683	0
AC010884.1	0	0	0	0	0	0	0	0	0	0	0	0	0	0	0	0	0	0.7664	0	0	0	0	0	0	0	0	0	0	0.8221	0	0.9077	0	0	0	0	0.7767	0.9933	0.8912	0.5426	0	0	0	2.8127	1.564	0.8731	0	0	2.3012	0
AC010884.2	0	0	0	0	0	0	0	0	0	0	0	0	0	0	0	0	0	0	0	0	0	0	0	0	0	0	0	0	0	0	0	0	0	0	0	0	0	0	0	0	0	0	0	0	0	0	0	0	0
AC010886.2	60.1877	95.9893	75.9255	15.5701	78.5871	34.7813	20.172	30.2223	54.1033	21.5028	39.2796	45.8726	32.9961	34.3067	34.8834	53.9487	43.5178	29.8899	76.2936	17.1072	30.3267	44.1815	73.9966	101.064	31.7642	72.2623	31.9611	38.2673	74.8148	25.9809	34.4909	38.0445	56.6704	35.9116	16.6262	19.4174	56.6175	10.694	40.1531	27.522	28.7855	24.1504	33.7529	25.8053	13.0967	46.3005	34.7832	9.9718	0
AC010887.1	0	0	0	0	0	0	0	0	0	0	0	0	0	0	0	0	0	0	0	0	0	0	0	0	0	0	0	0	0	0	0	0	0	0	0	0	0	0	0	0	0	0	0	0	0	0	0	0	0
AC010888.1	0	0	0	0	0	0	0	0	0	0	0	0	0	0	0	0	0	0	0	0	0	0	0	0	0	0	0	0	0	0	0	0	0	0	0	0	0	0	0	0	0	0	0	0	0	0	0	0	0
AC010890.1	5.1224	34.9052	5.6241	0	1.4033	3.7266	0	14.5901	1.9323	16.1271	1.3545	2.1844	1.1378	5.278	0	6.7436	2.6374	5.3649	8.138	5.4023	1.0457	0.8836	1.8733	0.9188	0	0	2.7395	2.5512	0.8221	1.0825	0	0.9511	0	2.3941	1.956	0.7767	1.9866	0	1.6278	2.359	0.8995	0.779	9.3758	0.782	0	2.3949	4.7742	4.6024	0
AC010891.2	0	0	0	0	0	0	0	0	0	0	0	0	0	0	0	0	0	0	0	0	0	0	0	0	0	0	0	0	0	0	0	0	0	0	0	0	0	0	0	0	0	0	0	0	0	0	0	0	0
AC010894.3	2.5612	2.9088	3.7494	3.3364	7.0167	11.1797	2.8817	11.4636	2.8984	8.9595	9.4813	9.8298	5.689	2.639	6.9767	5.6197	1.3187	5.3649	4.069	1.8008	0	7.069	2.81	7.3501	2.5411	9.0328	7.3054	8.929	7.3993	3.2476	7.2612	0	3.8421	9.5764	2.934	10.0971	0	3.5647	4.3409	1.5727	5.3973	3.8952	12.1885	3.9099	6.9849	3.9914	4.0921	8.4377	0
AC010894.4	0	0	0	0	0	0	0	1.0421	0	1.7919	0	0	0	0	0	0	0	0	1.0172	0	0	0	0	0	0	0	0	0	0	0	0	0	0	0.798	0	0	0	0	0.5426	0	0	0	0	0	0	0.7983	0	0	0
AC010894.5	7.6835	17.4526	3.7494	4.4486	5.6134	3.7266	0	1.0421	5.7968	17.919	5.4179	6.5532	5.689	7.9169	7.9733	3.3718	6.5936	3.0656	5.0862	6.3026	3.1372	2.6509	4.6833	6.4313	3.8117	3.8712	3.6527	3.8267	0.8221	4.3302	6.3536	8.56	1.921	1.5961	1.956	3.8835	4.9664	1.7823	0	0	4.4977	5.4533	4.6879	2.3459	2.6193	3.1931	1.364	2.3012	0
AC010900.2	1.2806	8.7263	12.1856	16.6822	12.6301	13.6641	14.4086	4.1686	16.4242	10.7514	9.4813	12.0142	18.2048	18.4728	17.94	8.9914	15.8246	16.861	6.1035	14.406	18.8235	14.1381	14.9866	10.1064	6.3528	21.9368	9.1317	10.2046	6.5771	11.9079	10.8919	11.4133	9.6052	5.5862	6.8461	5.4369	9.9329	16.9321	14.1078	10.2224	5.3973	8.5695	0	10.1657	7.858	9.5794	12.2764	9.9718	0
AC010904.1	0	0	0	0	0	2.4844	0	0	0.9661	0	0	0	0	1.3195	0	0	0	0	1.0172	3.6015	0	1.7673	0.9367	0.9188	0	1.2904	0	0	0	0	0	0	0	0	0	0	0	0	0	0	0	0	0	0	0.8731	0	0	0	0
AC010907.2	0	0	3.7494	0	5.6134	13.6641	0	3.1264	3.8645	5.3757	0	2.1844	9.1024	1.3195	3.9867	3.3718	30.3306	6.1313	6.1035	2.7011	3.1372	0.8836	0.9367	5.5126	39.3876	0	9.1317	0	0	4.3302	0.9077	0	1.921	0	10.7582	20.9708	0	4.4558	1.6278	0.7863	0	0.779	0	3.1279	0.8731	3.1931	1.364	2.3012	0
AC010907.5	1.2806	0	0	0	1.4033	0	0	0	0	0	0	2.1844	0	0	0	0	5.2749	0	2.0345	0	3.1372	0	0	0	1.2706	1.2904	0	0	0	0	0	0	0.9605	0	0	1.5534	0	3.5647	0	0	0	0	0	0	0	0	0	0	0
AC010928.1	0	0	0	0	0	0	0	0	0	0	0	0	0	0	0	0	0	0	0	0	0	0	0	0	0	0	0	0	0	0	0	0	0	0	0	0	0	0	0	0	0	0	0	0	0	0	0	0	0
AC010930.1	0	0	0	0	0	0	0	0	0	0	0	0	0	0	0	0	0	0	0	0	0	0	0	0	0	0	0	0	0	0	0	0	0	0	0	0	0	0	0	0	0	0	0	0	0	0	0	0	0
AC010967.1	0	0	0	0	0	0	0	0	0	0	0	0	0	0	0	0	1.3187	0	0	0	0	0	0	0.9188	0	1.2904	0	0	0	0	0	0	0	0	0	0	0	0	0	0	0	0	0	0	0	0	0	0	0
AC010967.2	0	0	0	0	0	0	0	0	0	0	1.3545	0	0	0	0	0	0	0.7664	0	0	0	0	0	0.9188	0	0	0	0	0	0	0	0	0	0	0	0	0	0	0	0	0	0	0	0	0.8731	0	0	0.7671	0
AC010967.3	0	0	0	0	0	0	0	0	0	0	0	0	0	0	0	0	0	0	0	0	0	0	0	0	0	0	0	0	0	0	0	0.9511	0	0	0	0	0	0	0	0	0	0	0	0	0	0	0	0	0
AC010969.1	0	0	0.9374	1.1121	4.21	6.2109	0	4.1686	3.8645	3.5838	0	1.0922	2.2756	2.639	0.9967	1.1239	7.9123	0	1.0172	0.9004	1.0457	2.6509	1.8733	29.4004	2.5411	5.1616	0.9132	3.8267	1.6443	0	0.9077	0.9511	1.921	0	1.956	3.1068	0.9933	2.6735	0.5426	3.9317	1.7991	2.3371	1.8752	0	0	2.3949	1.364	0	0
AC010970.1	0	0	0	0	0	0	0	0	0	0	0	0	0	0	0	0	0	0	0	7.203	0	0	0	0	0	0	0	0	0	0	0	0	0	0	0	0	0	0	0	0	0	0	0	0	0	0	0	0	0
AC010970.2	0	20.3614	52.4917	0	1302.3	52.1719	11.5269	144.858	1.9323	7.1676	150.346	103.759	9.1024	50.1405	7.9733	10.1154	0	3.0656	2.0345	72.0302	1.0457	4.4182	0	0.9188	0	0	0	0	0	0	0	0	0	0	0	1.5534	0	16.9321	1.6278	0	0	0	1.8752	7.0378	0	0.7983	0	0	308.268
AC010971.1	0	0	0	0	0	0	0	0	0	0	0	0	0	0	0	0	0	0	0	0	0	0	0	0	0	0	0	0	0	0	0	0	0	0	0	0	0	0	0	0	0	0	0	0	0	0	0	0	0
AC010974.3	0	0	0	0	0	0	0	0	0	0	0	1.0922	0	0	0	0	0	0	0	0	0	0.8836	0.9367	0	0	1.2904	0	0	0	0	2.723	0	0	0.798	0	0	0.9933	0	0	0	0	0	0	0	0	0	0	0	0
AC010975.1	0	0	0	0	0	0	0	19.8008	0	0	0	0	0	0	0	0	0	0	0	0	1.0457	0	0	0	0	0	0	0	0	0	0	0	0	0	0	0	0	0	0	0	0	0	0	0	0	0	0	0	0
AC010975.2	0	0	0	0	0	0	0	13.5479	2.8984	0	2.7089	0	0	0	0	0	0	0	0	0	2.0915	0	0	0	0	0	0	0	0	0	0	0	0	0.798	0	0	0	0	0	0	0	0	0	0	0	0	0	0	0
AC010976.2	149.829	93.0805	77.8002	82.2989	116.477	137.883	43.2258	40.6437	78.2565	130.809	105.648	122.327	95.575	104.24	91.6935	85.4187	175.39	64.3783	93.5869	41.4173	65.8822	73.3414	59.9466	98.3076	80.0458	127.749	76.7067	67.6056	52.617	76.8602	59.9053	61.8223	51.8678	63.8428	41.0766	65.2426	37.745	36.5377	54.2609	55.8302	51.2742	62.3237	71.256	44.5728	31.4322	22.352	47.7417	45.2567	23.7129
AC010980.2	3.8418	0	25.3085	6.6729	9.8234	0	2.8817	6.2529	14.492	7.1676	5.4179	9.8298	5.689	10.5559	0.9967	2.2479	9.231	19.1602	5.0862	5.4023	8.366	1.7673	6.5567	9.1876	0	1.2904	5.479	1.2756	3.2886	3.2476	0	9.5111	1.921	8.7784	5.8681	2.3301	0.9933	0.8912	3.7983	3.1454	4.4977	2.3371	3.7503	5.4739	3.4925	15.1674	1.364	9.9718	77.067
AC010982.2	0	0	0	0	0	0	0	0	0	0	0	0	0	0	0	0	3.9562	1.5328	0	0	0	0	0	1.8375	0	0	0	0	0	0	0	0	0	0	0	0	0	0	0	0	0	0	0	0	0	1.5966	0	0	0
AC010983.1	1.2806	0	0	0	0	0	0	0	0	0	0	2.1844	0	1.3195	0	0	0	0	0	0	0	0.8836	2.81	0.9188	0	0	0	0	0.8221	0	0	0	0	0	0	0	0	0	0	4.718	0	0	0	0.782	0	0	0.682	0	0
AC010987.5	0	0	0	0	0	0	0	0	0	0	0	0	0	0	0	0	0	0	0	0	0	0	0	0	0	0	0.9132	0	0	0	0.9077	0	0	0	0.978	0	0	0	0	0	0	0	0	0	0	0	0	0	0
AC010987.6	3.8418	0	0	0	0	0	0	1.0421	0.9661	0	0	0	0	0	0	0	0	0	1.0172	0	0	2.6509	1.8733	0.9188	1.2706	1.2904	0	1.2756	0.8221	0	0	0.9511	0	1.5961	0	0	0	0	0	0.7863	0.8995	0	0	0	0	0.7983	0	0	0
AC010999.1	0	0	0	0	0	0	0	0	0	0	0	0	0	0	0	0	0	0	0	0	0	0	0	0	0	0	0	0	0	0	0	0	0.9605	0	0	0	0	0	0	0	0	0	0	0	0	0	0	0	0
AC011073.1	0	0	0	0	0	0	0	0	0	0	0	0	0	0	0	0	0	0	0	0	0	0	0	0	0	0	0	0	0	0	0	0	0	0	0	0	0	0	0	0	0	0	0	0	0	0	0	0	0
AC011155.1	0	0	1.8747	0	1.4033	0	0	0	0.9661	0	0	0	2.2756	0	0	0	1.3187	0	1.0172	0	0	0	0	0.9188	0	0	0	1.2756	0	0	0	0	0	0.798	0	0.7767	0	0	0	0	0.8995	0	0	0	0	0	0	0	0
AC011193.1	0	0	0	0	0	0	0	0	0	0	0	0	0	0	0	0	0	0	0	0	0	0	0	0	0	0	0	0	0	0	0	0	0	0	0	0	0	0	0	0	0	0	0	0	0	0	0	0	0
AC011196.3	10.2447	0	0	0	0	0	0	0	0	0	0	0	0	1.3195	2.99	3.3718	0	0	0	0	3.1372	1.7673	0	0	0	1.2904	0	1.2756	0	0	0	0	0	0	0	0	0	0.8912	0	0	0	0	0	0	0	0	0	0	0
AC011225.1	0	0	0	0	0	0	0	0	0	0	0	0	0	0	0	0	0	0	0	0	0	0	0	0	0	0	0	0	0	0	0	0	0	0	0	0	0	0	0	0	0	0	0	0	0	0	0	0	0
AC011233.2	0	0	0	0	0	0	0	0	0	0	0	0	0	0	0	0	0	0	0	0	0	0	0	0	0	0	0	0	0	0	0	0	0	0	0	0	0	0	0	0	0	0	0	0	0	0	0	0	0
AC011239.1	12.8059	26.1789	17.8097	8.8972	8.42	21.1172	2.8817	8.3372	1.9323	21.5028	17.6081	13.1064	6.8268	13.1949	20.93	14.6111	14.5059	18.3938	13.2242	20.7087	12.549	9.7199	5.62	8.2689	19.0585	7.7424	8.2186	6.3779	1.6443	7.5778	7.2612	5.7067	8.6446	13.5666	3.9121	12.4272	1.9866	8.0205	7.0539	9.4361	9.895	15.5809	1.8752	3.9099	10.4774	6.3863	7.5023	13.8071	5.9282
AC011239.2	44.8206	31.9964	15.935	16.6822	9.8234	57.1406	74.9247	25.0115	9.6613	16.1271	23.026	36.0427	36.4095	21.1118	56.8101	44.9572	59.3424	33.722	17.2932	28.8121	41.83	31.8107	33.72	33.9942	53.3638	10.3232	43.8324	22.9604	15.6207	40.0539	38.1215	19.0222	27.8549	36.7096	7.8241	41.9416	30.792	16.041	23.8748	23.5902	34.1828	58.4285	11.251	23.4594	48.0214	20.7554	15.6865	37.5861	17.7847
AC011242.5	103.728	23.2701	18.747	45.598	29.4701	11.1797	17.2903	9.3793	26.0855	3.5838	33.8617	10.922	11.378	17.1533	20.93	21.3547	42.199	17.6274	12.207	9.0038	44.9672	26.5089	52.4533	27.5629	24.1408	32.26	18.2635	21.6848	6.5771	36.8063	22.6914	42.8	21.1313	9.5764	11.7362	4.6602	21.8524	10.694	18.4487	34.599	22.4887	9.3486	10.3134	34.4071	4.3656	7.1846	20.4607	69.0357	0
AC011242.6	122.937	20.3614	9.3735	28.9158	25.2601	7.4531	14.4086	13.5479	10.6274	1.7919	40.634	13.1064	12.5158	7.9169	8.97	30.3461	15.8246	16.861	14.2415	6.3026	31.3725	15.0217	23.4166	28.4816	5.0823	20.6464	23.7425	11.4802	4.1107	19.4857	29.9526	19.9733	22.0918	28.7293	3.9121	10.0971	15.8926	7.1293	8.6817	26.7356	19.79	8.5695	19.6892	33.6251	28.8128	10.3777	20.4607	82.0757	0
AC011243.1	0	8.7263	1.8747	0	0	0	0	4.1686	0	0	0	0	1.1378	0	0	1.1239	0	0.7664	1.0172	0	0	0.8836	0	0	1.2706	0	1.8263	0	0	0	0	0.9511	0	2.3941	0	0	0	0	1.0852	0	4.4977	0.779	1.8752	0	0.8731	0	0	0.7671	0
AC011247.3	2.5612	0	4.6868	2.2243	11.2267	1.2422	11.5269	8.3372	5.7968	32.2542	5.4179	10.922	4.5512	2.639	3.9867	4.4957	7.9123	8.4305	9.1552	8.1034	3.1372	7.9527	4.6833	6.4313	2.5411	2.5808	1.8263	3.8267	3.2886	3.2476	0	1.9022	7.6841	1.5961	0.978	3.1068	0	1.7823	5.4261	1.5727	0.8995	0.779	0.9376	0	1.7462	11.9743	2.7281	3.8353	5.9282
AC011284.3	39.6983	119.259	43.1182	10.0093	9.8234	58.3828	5.7634	81.2875	0.9661	75.2597	60.9511	93.9295	30.7206	13.1949	40.8634	14.6111	19.7808	14.5618	34.5865	7.203	13.5947	19.4399	2.81	18.3753	3.8117	78.7143	15.524	7.6535	4.9328	23.8158	5.4459	4.7556	10.5657	36.7096	10.7582	16.3106	10.9262	87.3341	11.3948	38.5307	11.6941	22.5923	52.5044	8.6018	30.5591	10.3777	14.3225	39.8873	5.9282
AC011286.1	3.8418	5.8175	0	0	0	0	2.8817	0	0	0	0	0	0	1.3195	0	0	0	0	0	1.8008	0	0.8836	0	0	0	0	0	0	0	0	0	0	0	0	0.978	0	0	0	0	0	0	0	0	0	0	0.7983	0	0	0
AC011288.2	2.5612	5.8175	4.6868	0	5.6134	8.6953	5.7634	6.2529	1.9323	3.5838	10.8357	2.1844	2.2756	2.639	4.9833	6.7436	5.2749	3.832	4.069	1.8008	1.0457	0.8836	2.81	4.5938	6.3528	7.7424	0	5.1023	0.8221	0	1.8153	0.9511	0.9605	0	0.978	1.5534	0.9933	1.7823	1.0852	0	0	1.5581	0.9376	0.782	0	1.5966	0	1.5341	0
AC011290.4	0	0	0	0	0	0	0	0	0	0	0	0	0	0	0.9967	0	0	0	2.0345	0	0	0	0	0	0	0	0	0	0	0	0	0	0	0	0	0	0	0	0	0	0	0	0.9376	0	0	0	0	0	0
AC011290.5	32.0147	31.9964	16.8723	14.4579	16.8401	31.0547	5.7634	26.0537	28.9839	19.7109	23.026	25.1207	21.6182	17.1533	26.9101	20.2307	19.7808	19.9266	29.5002	14.406	10.4575	15.0217	11.24	22.0503	16.5174	33.5504	9.1317	14.0314	14.7985	17.3206	14.5225	5.7067	13.4472	16.7587	9.7801	11.6505	16.8859	9.8028	10.8522	18.8722	8.0959	10.9066	10.3134	8.6018	12.2236	3.1931	10.2304	18.4095	0
AC011294.3	0	0	0	0	0	0	0	0	0	0	0	1.0922	0	0	0	1.1239	0	0	0	0.9004	0	0	0	0.9188	1.2706	6.452	0	1.2756	0.8221	2.1651	0.9077	1.9022	0	2.3941	0	0	2.9799	0	1.0852	0.7863	0	0	0	0	0	0	0.682	0.7671	0
AC011298.2	1.2806	2.9088	10.3109	0	0	0	0	3.1264	0	5.3757	0	2.1844	0	1.3195	0.9967	0	0	3.0656	6.1035	7.203	0	0	0	0.9188	2.5411	1.2904	0.9132	1.2756	0	0	0	6.6578	10.5657	0.798	1.956	0	3.9732	0	0.5426	0	0	0	6.5631	0	1.7462	0	4.0921	6.1365	0
AC011306.1	0	0	0	0	0	1.2422	0	0	0	0	0	0	0	0	0	0	0	0	0	0	0	0	0	0	0	0	0	0	0	0	0	0	0	0	0	0	0	0	0	0	0	0	0	0	0	0	0	0	0
AC011313.1	0	0	0	0	0	0	0	0	0	0	0	0	0	0	0	0	0	0	0	0	0	0	0	0	0	0	0	0	0	0	0	0	0	0	0	0	0	0	0	0	0	0	0	0	0	0	0	0	0
AC011322.1	1.2806	0	0.9374	3.3364	0	0	0	0	0.9661	0	0	0	0	0	0.9967	0	0	0	0	0	0	0	0.9367	0	1.2706	0	0	2.5512	0	0	0	0	0	2.3941	0.978	0	0	0	0.5426	0	0	0	0	0.782	0.8731	0	1.364	0	0
AC011330.13	23.0506	23.2701	10.3109	7.785	5.6134	12.4219	2.8817	7.295	11.5936	12.5433	6.7723	15.2909	6.8268	2.639	24.9167	19.1068	46.1552	6.1313	17.2932	0	6.2745	7.069	14.05	18.3753	21.5997	28.3888	9.1317	21.6848	11.51	21.6508	13.6148	19.9733	14.4077	15.9607	12.7142	12.4272	15.8926	5.347	5.4261	7.0771	12.5937	14.8019	12.1885	6.2558	16.5892	1.5966	4.0921	4.6024	0
AC011330.5	7.6835	0	14.0603	14.4579	0	19.875	34.5806	14.5901	38.6452	0	0	16.3831	0	0	43.8534	13.4872	32.968	20.693	42.7244	60.3253	9.4117	0	49.6433	36.7505	45.7404	5.1616	0	58.6766	0	41.1364	14.5225	55.1645	129.67	59.0546	41.0766	138.252	43.7048	100.701	42.8661	0	25.1873	0	0.9376	27.3693	91.6772	51.8885	0	37.5861	0
AC011343.1	2.5612	11.6351	14.9976	1.1121	0	44.7188	0	0	12.5597	1.7919	5.4179	6.5532	4.5512	3.9585	7.9733	14.6111	0	1.5328	16.276	7.203	12.549	3.5345	0	13.7814	6.3528	73.5527	6.3922	11.4802	8.2214	3.2476	13.6148	1.9022	0	14.3646	8.8021	34.1747	4.9664	1.7823	10.3096	14.9405	6.2968	91.1484	48.7541	1.564	10.4774	4.7897	7.5023	19.9436	0
AC011357.1	0	0	0	0	0	0	0	0	0	0	0	0	0	0	0	0	0	0	0	0	0	0	0	0	0	0	0	0	0	0	0	0	0	0	0	0	0	0	0	0	0	0	0	0	0	0	0	0	0
AC011363.1	0	0	0	0	0	0	0	0	0	0	0	0	0	0	0	0	0	0	0	0	0	0	0	0	0	0	0	0	0	0	0	0	0	0	0	0	0	0	0	0	0	0	0	0	0	0	0	0	0
AC011366.3	0	0	0	0	0	0	0	1.0421	0	0	0	0	0	0	0	0	0	0.7664	0	0	0	0	0	0	0	0	0	0	0	0	0	0	0	0	0	0	0	0.8912	0	0	0	0	0	0	0	0	0	0	0
AC011379.1	0	0	0	0	0	0	0	0	0	0	0	0	0	0	0	0	0	0	0	0	0	0	0	0	0	0	0	0	0	0	0	0	0	0	0	0	0	0	0	0	0	0	0	0	0	0	0	0	0
AC011406.2	10.2447	5.8175	4.6868	5.5607	4.21	1.2422	0	6.2529	1.9323	7.1676	6.7723	5.461	9.1024	7.9169	2.99	4.4957	6.5936	1.5328	8.138	0.9004	3.1372	4.4182	0.9367	7.3501	2.5411	10.3232	6.3922	6.3779	4.9328	6.4952	1.8153	2.8533	3.8421	6.3843	1.956	3.1068	3.9732	3.5647	5.9687	4.718	6.2968	4.6743	7.5006	1.564	0	3.9914	4.7742	2.3012	0
AC011410.1	0	0	0	0	0	0	0	0	0	0	0	0	0	0	0	0	0	0	0	0	0	0	0	0	0	0	0	0	0	0	0	0	0	0	0	0	0	0	0	0	0	0	0	0	0	0	0	0	0
AC011431.1	0	0	0	0	0	0	0	4.1686	0	0	0	1.0922	0	0	0	0	0	0	0	0	0	0.8836	0	0	0	0	0	0	0	0	0	0	0	0	0	0	0	0	0	0	0	0	0	0	0	0	0	0	0
AC011431.2	0	0	0	0	0	0	0	0	0	0	0	0	0	0	0	0	0	0	0	0	0	0	0	0	0	0	0	0	0	0	0	0	0	0	0	0	0	0	0	0	0	0	0	0	0	0	0	0	0
AC011450.1	0	0	0	0	0	0	0	0	0	0	0	0	0	0	0	0	0	0	0	0	0	0	0	0	0	0	0	0	0	0	0	0	0	0	0	0	0	0	0	0	0	0	0	0	0	0	0	0	0
AC011453.1	1.2806	0	0	0	0	0	0	0	0	0	0	0	0	0	0	0	0	0	0	0	0	0	0	0	0	0	0.9132	0	0	0	0	0	0	0	0	0	0	0	0	0	0	0	0	0	0	0	0	0	0
AC011456.1	0	0	0	0	0	0	0	0	0	0	0	0	0	0	0	0	0	0	0	0	0	0	0	0	0	0	0	0	0	0	0	0	0	0	0	0	0	0	0	0	0	0	0	0	0	0	0	0	0
AC011465.1	0	0	0	0	0	0	0	0	0	0	0	0	0	0	0	0	0	0	0	0	0	0	0	0	0	0	0	0	0	0	0	0	0	0	0	0	0	0	0	0	0	0	0	0	0	0	0	0	0
AC011467.1	0	0	0	0	0	0	0	0	0	0	0	0	0	0	0	0	0	0	0	0	0	0	0	0	0	0	0	0	0	0	0	0	0	0	0	0	0	0	0	0	0	0	0	0	0	0	0	0	0
AC011477.1	0	0	0	0	0	0	0	0	0	0	0	0	0	0	0	0	0	0	0	0	0	0	0	0	0	0	0	0	0	0	0	0	0	0	0	0	0	0	0	0	0	0	0	0	0	0	0	0	0
AC011499.1	0	2.9088	0	0	0	0	0	0	0	0	0	0	1.1378	0	0	0	0	0	0	0	0	0	0	0	0	0	0	0	0	0	0	0	0	0	0	0	0	0	0.5426	0	0	0	0	0	0	0	0	0	0
AC011513.3	0	0	0	1.1121	0	0	0	2.0843	0	0	0	0	2.2756	0	0	0	0	0	0	0	0	0	0	0	0	0	0	0	0	0	0	0	0	0	0.978	0	0	0	0	0	0	0	0	0	0	0	0	0	0
AC011513.4	0	0	0	0	0	0	0	0	0	0	0	0	0	0	0	0	0	0	0	0	0	0	0	0	0	0	0	0	0	0	0	0	0	0	0	0	0	0	0	0	0	0	0	0	0	0	0	0	0
AC011515.2	0	0	0	1.1121	1.4033	0	0	0	0	0	0	0	1.1378	0	0	0	0	0	1.0172	0.9004	0	0	0	1.8375	0	0	0.9132	1.2756	0	0	0	0	0	0	0	0.7767	0	0	2.1704	0	0	1.5581	0	0	0	2.3949	0	0	0
AC011516.1	0	0	0	0	0	0	0	0	0	0	0	0	0	0	0	0	0	0	0	0	0	0	0	0	0	0	0	0	0	0	0	0	0	0	0	0	0	0	0	0	0	0	0	0	0	0	0	0	0
AC011516.2	0	0	0	0	0	0	0	0	0	0	0	0	2.2756	1.3195	0	0	0	0	0	0	0	0.8836	0	0	0	0	0	0	0	0	0	0	0	0	0	0	0	0	1.0852	0.7863	0	0	0	0	0	0	0.682	0	0
AC011518.1	0	0	0	0	0	0	2.8817	0	0	0	0	0	0	0	0	0	0	0	0	0	0	0	0	0	0	0	0	0	0	0	0	0	0	0	0	0	0	0	0	0	0	0	0	0	0	0	0	0	0
AC011518.2	0	0	0	0	0	0	0	0	0	0	0	0	0	0	0	0	0	0	0	0	0	0	0	0	0	0	0	0	0	0	0	0	0	0	0	0	0	0	0	0	0	0	0	0	0	0	0	0	0
AC011523.2	0	0	0	0	0	0	0	0	0	7.1676	4.0634	3.2766	0	0	0.9967	1.1239	0	0	0	0	0	0	0	0	0	1.2904	0	0	0	0	0.9077	0	0	0	0.978	0	0	0	0	0	0	0	0	0	0.8731	0	0	0	0
AC011524.2	0	0	0	0	0	8.6953	2.8817	0	0	0	0	3.2766	3.4134	0	0	0	1.3187	3.832	2.0345	0.9004	3.1372	0	0	0	0	2.5808	4.5659	6.3779	1.6443	3.2476	0	0	0	0	3.9121	0	0.9933	3.5647	0	1.5727	0.8995	0	1.8752	0.782	0	0.7983	0	0.7671	0
AC011524.3	0	5.8175	0	0	0	11.1797	2.8817	0	0	3.5838	0	5.461	19.3426	0	1.9933	1.1239	13.1872	6.1313	3.0517	5.4023	1.0457	0.8836	0	1.8375	2.5411	0	9.1317	1.2756	3.2886	0	2.723	0.9511	1.921	0.798	5.8681	0	0	8.0205	0	0	0	3.1162	0	3.1279	4.3656	0	0.682	0.7671	0
AC011525.2	0	0	0	0	0	0	0	0	0	0	0	0	0	0	0	0	0	0	0	1.8008	0	0	0.9367	0	0	0	0	0	0	0	0	0	0	0	0	0	0	0	0	0	0	0	0.9376	0	0	0	0	0.7671	0
AC011525.4	0	0	0	0	0	1.2422	0	0	0.9661	0	1.3545	0	0	0	0	0	0	0	0	0	0	0	0	0	0	0	0	0	0	0	0	0	0	0.798	0.978	0	0	0.8912	0	0	0	0	0	0	0	0	0	0	0
AC011530.4	0	0	0	0	0	0	0	1.0421	0	0	2.7089	2.1844	0	0	0	0	0	1.5328	0	0	0	0	0	0.9188	2.5411	0	0	0	0	3.2476	2.723	0	2.8815	0	0	0	0	0	0.5426	2.359	0	0	4.6879	0	1.7462	3.1931	0	0.7671	0
AC011551.3	0	0	0	3.3364	4.21	6.2109	2.8817	2.0843	2.8984	0	1.3545	6.5532	3.4134	6.5974	1.9933	2.2479	0	3.832	4.069	3.6015	0	2.6509	1.8733	2.7563	1.2706	2.5808	1.8263	1.2756	4.1107	1.0825	0	3.8044	0	0	0.978	3.1068	0.9933	1.7823	0.5426	1.5727	0	0.779	0	1.564	2.6193	1.5966	0.682	1.5341	0
AC011558.5	166.477	0	43.1182	81.1867	88.4104	13.6641	5.7634	31.2644	48.3065	25.0866	79.9136	50.2414	13.6536	87.0862	56.8101	41.5854	5.2749	51.3494	30.5175	42.3177	28.2352	37.9961	0	104.739	8.894	72.2623	12.7844	33.165	42.7513	4.3302	0	0	38.4206	28.7293	32.2745	26.4077	0	14.2586	37.9826	31.4537	0	52.1961	15.0013	43.0088	27.0666	44.7039	64.7923	4.6024	0
AC011591.1	0	0	0	0	0	0	0	0	0	0	0	0	0	0	0	0	0	0	0	0	0	0	0	0	0	0	0	0	0	0	0	0	0	0	0	0	0	0	0	0	0	0	0	0	0	0	0	0	0
AC011625.1	1.2806	37.814	9.3735	3.3364	1.4033	1.2422	2.8817	30.2223	0.9661	19.7109	2.7089	25.1207	0	0	2.99	2.2479	0	0.7664	4.069	0.9004	0	1.7673	3.7467	0.9188	3.8117	2.5808	0	1.2756	3.2886	0	12.7072	1.9022	6.7236	9.5764	2.934	0.7767	0.9933	0	0	3.1454	5.3973	1.5581	4.6879	0	5.2387	0	2.0461	16.1083	0
AC011648.1	0	0	0	0	0	0	0	0	0	0	0	0	0	0	0	0	0	0	0	0	0	0	0	0	0	0	0	0	0	0	0	0	0	0	0	0	0	0	0	0	0	0	0	0	0	0	0	0	0
AC011718.4	0	0	0	0	0	0	0	1.0421	0	0	0	1.0922	0	0	0.9967	0	0	0	0	0	0	0	0	0	0	0	0	0	0	0	0	0	0	0	0	0	0	0	0	0.7863	0	0	0	0	0	0	0	0	0
AC011737.2	71.713	116.351	179.034	117.888	144.544	67.0782	187.312	109.425	81.1549	66.3002	128.674	77.5465	183.185	73.8913	61.7935	105.65	85.7168	105.764	92.5696	80.1335	127.581	105.152	103.033	56.0445	60.9873	49.0352	85.8384	82.9126	60.0163	97.4284	135.241	79.8934	117.183	98.1583	79.2192	109.514	56.6175	106.94	53.7183	99.079	103.448	116.857	159.388	32.0611	73.3417	80.6267	65.4743	109.69	23.7129
AC011738.1	0	0	0	0	0	0	0	0	0	0	0	0	0	0	0	0	0	0	0	0	0	0	0	0	0	0	0	0	0	0	0	0	0	0	0	0	0	0	0	0	0	0	0	0	0	0	0	0	0
AC011738.4	12.8059	37.814	7.4988	5.5607	1.4033	1.2422	0	2.0843	3.8645	0	2.7089	12.0142	3.4134	5.278	19.9334	21.3547	1.3187	8.4305	5.0862	10.8045	4.183	4.4182	6.5567	20.2128	1.2706	91.6183	10.9581	70.1568	5.755	9.7428	18.1531	3.8044	1.921	2.3941	0	2.3301	21.8524	1.7823	36.8974	26.7356	9.895	3.8952	4.6879	11.7297	10.4774	0	12.2764	0.7671	0
AC011742.3	2.5612	0	0	0	0	0	0	0	0	5.3757	0	2.1844	2.2756	1.3195	4.9833	0	0	0.7664	0	0.9004	1.0457	2.6509	0	0.9188	1.2706	3.8712	0.9132	3.8267	0.8221	1.0825	0	0.9511	3.8421	0	0.978	0	0	0.8912	1.6278	0	0	1.5581	0	1.564	0	0	1.364	0	0
AC011742.5	0	0	0	0	0	0	0	0	0	0	0	0	0	0	0	0	0	0	0	0	0	0	0	0	0	0	0	2.5512	0	0	0	0	0	0	0	0	0	0	0	0	0	0	0	0	0	0	0	0	0
AC011747.4	79.3966	61.0841	133.104	25.5794	23.8568	108.07	48.9892	27.0958	19.3226	1227.45	62.3055	244.654	158.154	36.9457	95.6802	89.9144	83.0794	79.7065	67.1384	99.0415	72.1567	34.4616	64.6299	51.4507	62.2578	112.265	71.2276	167.101	36.1742	126.657	177.9	57.0667	606.085	119.705	92.9114	135.922	39.7316	57.0345	54.8035	40.8898	53.0733	257.085	94.6955	197.059	36.6709	96.5924	59.3361	29.1484	41.4976
AC011747.6	2.5612	0	1.8747	0	0	0	2.8817	0	0	25.0866	0	3.2766	0	1.3195	1.9933	0	1.3187	0.7664	0	2.7011	0	2.6509	0	1.8375	2.5411	1.2904	0	1.2756	0.8221	0	1.8153	0.9511	40.3416	1.5961	0.978	0.7767	1.9866	0	0.5426	1.5727	0	0	0.9376	0	0	2.3949	2.0461	0	0
AC011748.1	0	0	0	0	0	0	0	0	0	0	0	0	0	0	0	0	0	0	0	0	0	0	0	0	0	0	0	0	0	0	0	0	0	0	0	0	0	0	0	0	0	0	0	0	0	0	0	0	0
AC011752.1	1.2806	0	0.9374	0	0	0	0	0	0	0	0	0	0	0	1.9933	3.3718	0	0	0	0	1.0457	0.8836	0.9367	0	0	1.2904	0.9132	0	0	0	0	0.9511	0	0.798	0	0	0	0	0	0	0	0	0	0	0.8731	0	0	0	0
AC011753.5	1.2806	2.9088	6.5615	2.2243	2.8067	6.2109	2.8817	4.1686	1.9323	3.5838	9.4813	1.0922	2.2756	1.3195	0.9967	3.3718	10.5498	6.8977	8.138	0	5.2287	0.8836	6.5567	0.9188	7.6234	2.5808	0.9132	3.8267	2.4664	0	0.9077	0.9511	0.9605	2.3941	3.9121	0	4.9664	0.8912	1.6278	0.7863	2.6986	0.779	0.9376	1.564	1.7462	3.1931	3.4101	2.3012	0
AC011753.6	0	0	0	0	0	0	0	0	0	0	0	0	0	0	0	0	0	0	0	0	0	0	0	0	0	0	0	0	0	0	0	0	0	0	0	0	0	0	0	0	0	0	0	0	0	0	0	0	0
AC011754.1	0	0	0	0	0	0	0	0	0	0	0	0	0	0	0	0	0	0	0	0	0	0	0	0	0	0	0	0	0	0	0	0	0	0	0	0	0	0	0	0	0	0	0	0	0	0	0	0	0
AC011816.1	11.5253	0	14.0603	7.785	8.42	11.1797	0	6.2529	0	12.5433	2.7089	13.1064	1.1378	10.5559	5.98	7.8675	9.231	1.5328	3.0517	0	8.366	3.5345	1.8733	7.3501	13.9762	1.2904	8.2186	8.929	5.755	4.3302	1.8153	3.8044	15.3682	8.7784	1.956	5.4369	4.9664	5.347	2.1704	4.718	3.5982	8.5695	5.6255	3.1279	4.3656	4.7897	2.0461	2.3012	0
AC011893.3	0	0	0.9374	0	0	0	0	2.0843	0.9661	1.7919	0	1.0922	0	1.3195	1.9933	0	0	0	0	0.9004	0	0.8836	1.8733	0.9188	0	0	2.7395	0	0.8221	0	0	0	0	0	0	1.5534	0	0	1.0852	0	0.8995	0	0	0	0	0	0	0	0
AC011897.2	0	0	0	0	0	0	0	0	0	0	0	0	0	0	0	0	0	0	1.0172	0	0	0	0	0	0	0	0	0	0	0	0	0	0	0	0	0	0	0	0	0	0	0	0	0	0	0	0	0	0
AC011899.10	5.1224	0	7.4988	8.8972	0	0	0	8.3372	2.8984	23.2947	4.0634	41.5037	0	0	2.99	4.4957	25.0557	1.5328	4.069	1.8008	29.281	1.7673	3.7467	3.6751	11.4351	2.5808	0.9132	1.2756	0.8221	4.3302	2.723	41.8489	38.4206	24.7391	2.934	2.3301	0	11.5851	0	2.359	2.6986	3.1162	3.7503	0	6.9849	4.7897	6.1382	105.088	11.8565
AC011899.9	23.0506	26.1789	10.3109	15.5701	7.0167	9.9375	17.2903	7.295	1.9323	26.8785	1.3545	25.1207	5.689	7.9169	18.9367	11.2393	46.1552	10.7297	17.2932	30.6128	28.2352	7.069	19.67	12.8627	7.6234	32.26	9.1317	2.5512	13.9764	9.7428	17.2455	20.9245	177.695	31.9214	10.7582	17.0873	6.953	7.1293	12.48	0.7863	6.2968	8.5695	4.6879	7.0378	11.3505	40.7125	12.2764	36.052	29.6412
AC011901.2	0	0	0	0	0	0	0	0	0	0	0	0	0	0	0	0	0	0	0	0	0	0	0	0	0	0	0	0	0	0	0	0	0	0	0	0	0	0	0	0	0	0	0	0	0	0	0	0	0
AC011933.2	14.0865	23.2701	13.1229	2.2243	22.4534	7.4531	2.8817	13.5479	5.7968	30.4623	24.3804	12.0142	13.6536	14.5144	3.9867	13.4872	7.9123	7.6641	7.1207	2.7011	6.2745	9.7199	18.7333	15.619	0	20.6464	3.6527	8.929	9.8657	6.4952	10.8919	6.6578	12.4867	11.9705	5.8681	10.0971	7.9463	9.8028	10.3096	7.0771	8.0959	10.9066	8.4382	5.4739	6.1118	7.9828	5.4562	6.1365	5.9282
AC011994.1	0	0	0	0	0	0	0	0	0	0	0	0	0	0	0	0	0	0	0	0	0	0	0	0	0	0	0	0	0	0	0	0	0	0	0	0	0	0	0	0	0	0	0	0	0	0	0	0	0
AC011995.1	0	0	0.9374	0	0	1.2422	0	0	0	0	0	0	0	0	0	0	0	0	0	0	0	0	0	0.9188	0	0	0	0	0	0	0	0	0	0	0	0	0	0	0	0	0	0	0	0	0	0	0	0	0
AC011995.3	0	0	0	0	0	1.2422	0	0	0	0	0	0	0	0	0	0	0	0	0	0	0	0	0	0	0	0	0	0	0	0	0	0	0	0	0	0	0	0	0	0	0	0	0.9376	0	0	0	0	0	0
AC011997.1	0	0	0.9374	0	0	0	0	0	0	0	0	1.0922	0	0	0.9967	0	0	0	0	0	0	0	0	0	0	0	0	0	0	0	0	0	0	0	0	0	0	0	0	0.7863	0	0	0	0	0.8731	0	0.682	0.7671	0
AC011998.1	0	0	0	0	0	1.2422	0	2.0843	0	0	0	0	0	0	0	0	1.3187	0	0	0	0	0.8836	0	0	0	0	0	0	0	0	0	0	0	0	0	0	0	0	0	0	0	0	0	0	0	0	0	0	0
AC011998.2	0	0	0	0	0	0	11.5269	15.6322	0	0	0	0	0	1.3195	0	0	0	0	0	0.9004	0	1.7673	0	0	0	1.2904	0	0	0	0	0	0	0	0	0	0	0.9933	0	0	0	0	0	0	0	0	0.7983	0	0.7671	0
AC011998.4	0	0	0	0	0	0	0	0	0	0	0	0	0	0	0	0	0	0	0	0	0	0	0	0	0	0	0	0	0	0	0	0	0	0	0	0	0	0	0	0	0	0	0	0	0	0	0	0	0
AC011999.1	1.2806	0	0.9374	1.1121	4.21	1.2422	2.8817	0	1.9323	0	0	4.3688	2.2756	0	1.9933	0	1.3187	0.7664	1.0172	1.8008	2.0915	2.6509	0	1.8375	0	3.8712	4.5659	0	0	1.0825	2.723	0	0	0.798	4.8901	0	0.9933	0	0.5426	0	0	0.779	0	1.564	0.8731	3.1931	2.0461	0.7671	0
AC012003.1	0	0	0	0	0	0	0	0	0	0	0	0	0	0	0	0	0	0	0	0	0	0	0	0	0	0	0	0	0	0	0	0	0	0	0	0	0	0	0	0	0	0	0	0	0	0	0	0	0
AC012005.3	0	0	0	0	0	0	0	0	0	0	0	0	0	0	0	0	0	0	0	0	0	0	0	0	0	0	0	0	0	0	0	0	0	0	0	0	0	0	0	0	0	0	0	0	0	0	0	0	0
AC012047.1	0	0	0	0	0	0	0	0	0	0	0	0	0	0	0	0	0	0	0	0	0	0	0	0	0	0	0	0	0	0	0	0	0	0	0	0	0	0	0	0	0	0	0	0	0	0	0	0	0
AC012065.4	0	2.9088	0	0	1.4033	0	0	0	0	0	0	0	0	1.3195	0	1.1239	1.3187	0	0	1.8008	0	0	0	0	0	1.2904	0	0	0.8221	0	0	0	0	0	0	0	0	0	0	0	0	0	0.9376	0	0	0.7983	0	0	0
AC012065.5	2.5612	0	1.8747	2.2243	2.8067	1.2422	2.8817	0	4.8307	1.7919	2.7089	0	9.1024	0	2.99	1.1239	7.9123	0.7664	1.0172	0.9004	6.2745	2.6509	2.81	9.1876	0	7.7424	3.6527	7.6535	1.6443	4.3302	2.723	0.9511	0.9605	0.798	0.978	0	3.9732	2.6735	3.2557	6.2907	1.7991	7.0114	9.3758	1.564	3.4925	0	4.0921	2.3012	0
AC012066.1	65.3101	8.7263	23.4338	38.9251	19.6468	26.0859	48.9892	90.6668	19.3226	16.1271	35.2162	19.6597	54.6143	27.7092	31.8934	24.7265	27.6931	62.0791	37.6382	100.842	38.6927	27.3926	17.7966	34.913	25.4114	16.7752	29.2216	39.5429	26.3085	22.7333	11.7995	19.9733	31.697	18.3548	32.2745	40.3882	9.9329	107.831	46.1218	33.0263	20.6896	33.499	0	61.7763	38.4171	165.245	30.009	40.6543	171.919
AC012074.2	12.8059	5.8175	7.4988	13.3458	8.42	22.3594	14.4086	6.2529	9.6613	8.9595	9.4813	13.1064	10.2402	18.4728	15.9467	19.1068	14.5059	9.9633	19.3277	7.203	25.098	16.789	13.1133	12.8627	8.894	18.0656	10.9581	16.5825	11.51	6.4952	15.4301	10.4622	7.6841	7.1823	4.8901	7.767	8.9396	0.8912	9.2244	18.8722	14.3928	7.7905	7.5006	21.1134	3.4925	7.9828	9.5483	4.6024	5.9282
AC012075.1	0	0	0	0	0	0	0	0	0	0	0	0	0	0	0	0	0	0	0	0	0	0	0	0	0	0	0	0	0	0	0	0	0	0	0	0	0	0	0	0	0	0	0	0	0	0	0	0	0
AC012075.2	0	0	0	0	0	0	0	0	0	0	0	0	0	0	0	0	0	0	0	0	0	0	0	0	0	0	0	0	0	0	0	0	0	0	0	0	0	0	0	0	0	0	0	0	0	0	0	0	0
AC012078.2	0	0	1.8747	0	0	0	0	0	0	0	5.4179	0	0	2.639	0	0	118.685	0	6.1035	0	0	0	0	2.7563	1.2706	0	0	0	0	3.2476	0	0	0	0	0	3.8835	5.9597	4.4558	1.0852	0	0	0	0	0	0	0	0	0	0
AC012119.1	0	0	0	0	0	0	0	0	0	0	0	0	0	0	0	0	0	0	0	0	0	0	0	0	0	0	0	0	0	0	0	0	0	0	0	0	0	0	0	0	0	0	0	0	0	0	0	0	0
AC012123.1	15.3671	2.9088	5.6241	5.5607	4.21	0	2.8817	1.0421	1.9323	1.7919	4.0634	9.8298	3.4134	3.9585	8.97	5.6197	9.231	9.9633	7.1207	5.4023	6.2745	4.4182	3.7467	12.8627	1.2706	18.0656	2.7395	11.4802	1.6443	11.9079	3.6306	10.4622	0.9605	0.798	2.934	4.6602	3.9732	0.8912	1.6278	5.5044	3.5982	3.1162	1.8752	0	0.8731	0.7983	11.5944	2.3012	5.9282
AC012146.7	26.8924	0	3.7494	10.0093	5.6134	23.6016	5.7634	11.4636	17.3903	17.919	52.8243	8.7376	5.689	6.5974	6.9767	5.6197	11.8685	3.832	9.1552	4.5019	7.3202	8.8363	7.4933	17.4565	10.1645	32.26	8.2186	10.2046	12.3321	10.8254	11.7995	1.9022	9.6052	14.3646	12.7142	31.8446	10.9262	16.041	4.8835	10.2224	11.6941	19.4762	17.814	2.3459	12.2236	8.7811	6.1382	9.2048	5.9282
AC012150.1	0	0	0	0	0	0	0	0	0	0	0	0	0	0	0	0	0	0	0	0	0	0	0	0	0	0	0	0	0	0	0	0	0	0	0	0	0	0	0	0	0	0	0	0	0	0	0	0	0
AC012175.1	0	0	0	0	0	0	0	0	0	0	0	0	0	0	0	0	0	0	0	0	0	0	0	0	0	0	0	0	0	0	0	0	0	0	0	0	0	0	0	0	0	0	0	0	0	0	0	0	0
AC012181.1	0	0	0	0	0	0	0	0	0	0	0	0	0	0	0	0	0	0	0	0	0	0	0	0	0	0	0	0	0	0	0	0	0	0	0	0	0	0	0	0	0	0	0	0	0	0	0	0	0
AC012306.2	0	0	0	0	0	0	0	0	0	0	0	0	0	0	0	0	0	0	0	0	0	0	0	0	0	0	0	0	0	0	0	0	0	0	0	0	0	0	0	0	0	0	0	0	0	0	0	0	0
AC012307.2	0	0	0	0	0	0	0	0	0	0	0	0	0	0	0	0	0	0	0	0	0	0	0	0	0	0	0	0	0	0	0	0	0	0	0	0	0	0	0	0	0	0	0	0	0	0	0	0	0
AC012314.19	20.4894	0	1.8747	2.2243	5.6134	0	11.5269	4.1686	1.9323	7.1676	2.7089	2.1844	3.4134	6.5974	2.99	0	3.9562	1.5328	2.0345	2.7011	2.0915	4.4182	6.5567	0	2.5411	3.8712	0.9132	1.2756	3.2886	0	0.9077	2.8533	0.9605	0	4.8901	0.7767	5.9597	2.6735	0.5426	2.359	0	1.5581	1.8752	0	0	3.1931	0.682	1.5341	0
AC012314.20	0	0	0.9374	0	0	1.2422	0	0	0.9661	1.7919	1.3545	0	0	0	0	0	0	0.7664	0	0	0	0	0	0	0	0	0	0	0.8221	0	0.9077	0	0	0	0	0.7767	0	0	0	0	0	0	0	0	0	0.7983	0	0	0
AC012314.8	70.4324	101.807	36.5567	48.9345	74.377	55.8985	83.5698	27.0958	47.3404	57.3407	32.5072	40.4115	47.7875	84.4472	69.7668	57.3204	55.3862	93.5018	49.8452	156.666	36.6012	53.9015	52.4533	58.8008	33.0348	68.3911	39.2665	51.0231	32.8856	29.2285	19.9684	39.9467	37.4601	19.1528	12.7142	33.398	41.7182	98.028	94.9566	57.4029	32.3837	27.2666	2.8127	34.4071	32.3053	68.6524	50.4698	18.4095	88.9235
AC012322.1	0	0	0	0	0	0	0	0	0	0	0	0	0	0	0	1.1239	0	0	0	0	0	0	0	0	0	0	0	0	0	0	0	0	0	0.798	0.978	0	0	0	0	0	0	0	0	0	0	0	0	0	0
AC012353.1	0	0	0	0	0	0	0	0	0	0	0	0	0	0	0	0	0	0	0	0	0	0	0	0	0	0	0	0	0	0	0	0	0	0	0	0	0	0	0	0	0	0	0	0	0	0	0	0	0
AC012354.6	0	0	0	0	0	1.2422	0	0	0	0	0	3.2766	0	0	0	1.1239	0	0	0	2.7011	0	0.8836	0	0	0	10.3232	0	2.5512	0	0	2.723	0	0	0	0	0	0	0	2.713	1.5727	0	0	0	0	0.8731	0	2.7281	0	0
AC012354.8	1.2806	0	7.4988	4.4486	9.8234	1.2422	2.8817	5.2107	3.8645	1.7919	6.7723	3.2766	4.5512	3.9585	6.9767	2.2479	1.3187	6.1313	2.0345	0.9004	2.0915	4.4182	1.8733	0.9188	3.8117	1.2904	3.6527	0	2.4664	3.2476	2.723	4.7556	4.8026	2.3941	2.934	1.5534	0.9933	2.6735	1.6278	0.7863	0.8995	2.3371	5.6255	1.564	0	7.1846	1.364	0	0
AC012358.4	71.713	116.351	25.3085	56.7195	70.167	74.5313	132.559	46.8966	56.0355	112.89	41.9885	83.0075	75.0947	31.6677	65.7801	76.4273	120.004	59.7799	59.0004	53.1222	39.7385	55.6687	76.8066	44.1006	47.011	63.2295	35.6138	44.6452	27.9528	48.7142	29.9526	58.9689	47.0652	27.1332	57.7028	34.9514	62.5773	55.2522	46.1218	51.1122	27.886	24.1504	21.5643	58.6484	22.701	27.1417	31.3731	18.4095	11.8565
AC012358.7	19.2088	34.9052	3.7494	4.4486	8.42	16.1484	2.8817	4.1686	2.8984	14.3352	12.1902	20.7519	10.2402	5.278	7.9733	7.8675	19.7808	6.1313	7.1207	0.9004	8.366	11.4872	6.5567	16.5377	8.894	14.1944	12.7844	10.2046	0	9.7428	13.6148	9.5111	6.7236	7.9803	8.8021	11.6505	10.9262	7.1293	9.2244	17.2995	10.7946	6.2324	4.6879	8.6018	6.1118	3.1931	8.8663	6.1365	17.7847
AC012358.8	33.2953	49.449	27.1832	26.6915	33.6802	58.3828	51.8709	27.0958	28.0178	34.0461	37.9251	52.4258	36.4095	15.8339	35.8801	32.594	32.968	33.722	51.8797	30.6128	25.098	29.1598	29.9733	37.6693	25.4114	34.8408	23.7425	26.7871	26.3085	27.0634	30.8603	31.3867	25.9339	24.7391	18.5823	25.631	21.8524	24.0614	22.7896	14.9405	13.4932	47.5218	25.3146	26.5873	26.1935	27.1417	23.8708	17.6424	47.4258
AC012360.4	0	0	0.9374	0	2.8067	0	14.4086	0	0	1.7919	0	0	0	1.3195	0	0	0	0	0	0	0	0	0	0	0	0	0	0	3.2886	0	0	0	0.9605	0	0	0.7767	0	0	0	0	1.7991	0.779	0	0	0	0	0	0	0
AC012360.6	386.738	75.6279	42.1808	152.364	64.5537	31.0547	37.4623	40.6437	34.7807	223.987	224.842	67.7166	30.7206	109.517	36.8767	67.4358	200.445	45.9845	72.2247	36.0151	81.5684	103.385	174.22	156.19	143.574	72.2623	32.8743	68.8812	62.4827	44.3841	59.9053	221.609	130.63	117.311	49.8787	65.2426	68.537	8.0205	71.6244	54.2576	43.1783	105.95	20.6267	31.2791	20.9548	81.425	67.5204	56.7627	23.7129
AC012361.1	0	0	0	0	0	0	0	0	0	0	0	0	0	0	0	0	0	0	0	0	0	0	0	0	0	0	0	0	0	0	0	0	0	0	0	0	0	0	0	0	0	0	0	0	0	0	0	0	0
AC012362.3	0	0	0	1.1121	1.4033	0	0	0	0	3.5838	0	6.5532	1.1378	1.3195	0	0	1.3187	2.2992	2.0345	1.8008	0	1.7673	0.9367	0.9188	0	0	0	0	0	1.0825	1.8153	3.8044	0	0.798	0	1.5534	1.9866	1.7823	0.5426	1.5727	4.4977	0	0	0.782	1.7462	0	0	0	0
AC012363.10	0	2.9088	0	1.1121	1.4033	3.7266	0	1.0421	0	3.5838	2.7089	2.1844	0	0	0	1.1239	1.3187	0	0	0.9004	2.0915	0.8836	0	2.7563	1.2706	0	0	1.2756	0	0	0	0	1.921	0	0	0.7767	0.9933	1.7823	0.5426	1.5727	0	2.3371	0	0	0	0.7983	1.364	2.3012	0
AC012363.13	0	0	0	1.1121	0	0	0	0	0	0	1.3545	0	0	1.3195	0	1.1239	0	0	1.0172	0	0	0	0	1.8375	0	0	0	0	0	0	0	0	0	0	0	0	0	0	0	0	0	0	0	0	0	0	0	0	0
AC012363.4	0	0	0	0	1.4033	3.7266	0	1.0421	0	1.7919	0	0	3.4134	0	0	0	0	0	1.0172	2.7011	0	0.8836	0	0.9188	0	1.2904	0	0	0	0	0	0	0.9605	0	0	0.7767	0	1.7823	3.2557	0	0.8995	0	0	0	0	3.1931	0	0	0
AC012363.7	6.4029	8.7263	0	3.3364	4.21	6.2109	0	1.0421	0	3.5838	4.0634	1.0922	2.2756	3.9585	3.9867	2.2479	5.2749	0.7664	1.0172	0	2.0915	5.3018	0	5.5126	1.2706	15.4848	0.9132	5.1023	2.4664	2.1651	2.723	2.8533	4.8026	3.9902	2.934	3.1068	1.9866	2.6735	4.3409	7.8634	2.6986	3.1162	5.6255	0.782	1.7462	1.5966	0.682	3.8353	0
AC012363.8	12.8059	8.7263	5.6241	3.3364	4.21	7.4531	0	4.1686	2.8984	3.5838	4.0634	2.1844	0	1.3195	1.9933	4.4957	2.6374	1.5328	1.0172	0.9004	2.0915	0.8836	1.8733	5.5126	2.5411	5.1616	5.479	1.2756	5.755	4.3302	0	2.8533	4.8026	4.7882	3.9121	2.3301	0.9933	4.4558	4.3409	7.8634	1.7991	5.4533	3.7503	2.3459	0.8731	1.5966	0.682	2.3012	0
AC012365.3	0	0	0	1.1121	0	1.2422	0	0	0	0	0	0	0	0	0	0	0	0	1.0172	0	0	1.7673	0	0.9188	0	0	0	0	0	0	0	0	0	0	0	0	0	0	0	0	0	0	0	0	0	0	0	0	0
AC012368.1	1.2806	0	0	0	1.4033	0	0	0	2.8984	0	0	3.2766	0	0	0	1.1239	0	0	1.0172	0	0	0.8836	0	0.9188	1.2706	0	2.7395	0	0	0	0.9077	0	0	0	0.978	0.7767	0	0	0.5426	0	0	0	0	0	0.8731	0	0	0	0
AC012370.2	25.6118	11.6351	5.6241	3.3364	2.8067	11.1797	5.7634	5.2107	5.7968	5.3757	24.3804	4.3688	2.2756	2.639	3.9867	5.6197	5.2749	1.5328	8.138	9.0038	7.3202	1.7673	0.9367	9.1876	1.2706	12.904	3.6527	5.1023	3.2886	7.5778	0.9077	0	3.8421	2.3941	0.978	0.7767	0.9933	0	5.9687	3.9317	1.7991	0	4.6879	1.564	0	1.5966	2.0461	2.3012	0
AC012370.3	5.1224	2.9088	2.8121	0	4.21	12.4219	2.8817	9.3793	1.9323	3.5838	1.3545	8.7376	2.2756	3.9585	6.9767	4.4957	15.8246	4.5985	10.1725	5.4023	7.3202	10.6036	1.8733	16.5377	0	15.4848	14.6108	8.929	1.6443	8.6603	8.1689	2.8533	0	3.9902	1.956	1.5534	6.953	0.8912	5.9687	7.0771	4.4977	6.2324	11.251	6.2558	5.2387	1.5966	10.9124	3.8353	0
AC012442.5	0	0	0	0	4.21	0	14.4086	0	0	0	0	0	0	0	0	1.1239	0	2.2992	1.0172	5.4023	0	0	0	0	0	0	0	0	0	0	0.9077	0	0	1.5961	2.934	0	0	0	0	0	0	0	0	0.782	4.3656	0	0.682	0	0
AC012442.6	5.1224	8.7263	0	3.3364	8.42	7.4531	5.7634	3.1264	3.8645	10.7514	4.0634	2.1844	2.2756	3.9585	4.9833	2.2479	3.9562	5.3649	1.0172	2.7011	6.2745	1.7673	1.8733	7.3501	1.2706	3.8712	3.6527	3.8267	0.8221	1.0825	0.9077	6.6578	2.8815	3.1921	1.956	3.1068	3.9732	3.5647	3.7983	5.5044	4.4977	1.5581	3.7503	3.9099	4.3656	0.7983	3.4101	1.5341	0
AC012445.1	0	0	0	0	0	0	0	0	0	0	1.3545	0	0	0	0	0	0	0	0	0	0	0	0	0	0	0	0	0	0	0	0	0	0	0	0	0	0	0	0	0	1.7991	0	1.8752	0	0	0	0	2.3012	0
AC012451.1	0	0	0	0	1.4033	0	0	0	0	0	0	0	0	0	0.9967	0	0	0	0	0	0	0	0	0	0	0	0	0	0	0	0	0	0	0	0	0	0	0	0.5426	0	0	0	0	0	0	0	0	0	0
AC012454.4	3.8418	0	2.8121	1.1121	1.4033	0	0	0	2.8984	1.7919	1.3545	0	1.1378	0	0	1.1239	0	0	0	3.6015	2.0915	0	0	1.8375	0	0	0	0	0.8221	0	0	0	0	0	0	0.7767	0	0	0	0	1.7991	0.779	0	0	0	0	0	0	0
AC012456.3	0	23.2701	14.9976	3.3364	11.2267	4.9688	2.8817	9.3793	30.9162	157.687	24.3804	70.9933	4.5512	1.3195	1.9933	43.8333	0	0	15.2587	0.9004	0	15.9054	24.3533	13.7814	2.5411	2.5808	3.6527	0	3.2886	0	1.8153	0.9511	7.6841	18.3548	0.978	0.7767	4.9664	5.347	0	0.7863	52.1737	0.779	5.6255	0	1.7462	0	2.0461	0	0
AC012456.4	2.5612	11.6351	1.8747	0	4.21	4.9688	0	0	3.8645	23.2947	0	4.3688	0	0	0	2.2479	0	0	1.0172	0	0	2.6509	6.5567	1.8375	0	0	0	0	0	0	0	0	0.9605	0	0	0	0	0	0	0	7.1964	0	0	0	0	0	0	0	0
AC012462.1	0	0	0	0	0	0	0	0	0	0	0	0	0	0	0	0	0	0	0	0	0	0	0	0	0	0	0	0	0	0	0	0	0	0	0	0	0	0	0	0	0	0	0	0	0	0	0	0	0
AC012462.2	1.2806	0	0	0	0	0	0	0	0	0	1.3545	0	0	2.639	0	0	0	0	0	0	0	0	0	0	0	0	0	0	4.1107	0	0	0	0	0	0	0	0	0	0.5426	0	0	0	0	0	0	1.5966	0	0	0
AC012462.3	0	0	0	0	0	0	0	0	0	0	0	0	0	0	0	0	0	0	0	0	0	0	0	0	0	1.2904	0	0	0	0	0	0	0	0	0	0	0	0	0	0	0	0	0	0	0	0.7983	0	0	0
AC012485.2	2.5612	0	2.8121	0	0	0	0	0	0	0	0	0	0	0	0.9967	0	0	0.7664	0	0.9004	2.0915	0.8836	1.8733	1.8375	0	0	0.9132	1.2756	0.8221	2.1651	1.8153	0	0	0	0	0	0.9933	0	0	0	0	0	0.9376	1.564	1.7462	1.5966	0	0.7671	0
AC012487.2	7.6835	37.814	3.7494	13.3458	11.2267	7.4531	23.0537	15.6322	0.9661	10.7514	6.7723	3.2766	2.2756	3.9585	7.9733	5.6197	3.9562	11.4961	11.1897	9.0038	6.2745	6.1854	3.7467	7.3501	2.5411	6.452	10.9581	0	8.2214	4.3302	4.5383	4.7556	6.7236	8.7784	8.8021	3.8835	2.9799	4.4558	8.1391	8.6498	7.1964	7.0114	4.6879	3.9099	5.2387	15.9657	8.8663	6.1365	41.4976
AC012493.1	0	0	0	0	0	0	0	0	0	0	0	1.0922	0	0	0	0	0	0	0	0	0	0	0	0	0	0	0	0	0	0	0	0	1.921	0.798	0	0	0	0	0	0	0	0	0	0	0	0	0	0	0
AC012494.1	0	0	0	0	0	0	0	0	0	0	0	0	0	0	0	0	0	0	0	0	0	0	0	0	0	0	0	0	0	0	0	0	0	0	0	0	0	0	0	0	0	0	0	0.782	0	0	0	0	0
AC012497.2	0	0	0	0	0	0	0	0	0	0	0	0	0	0	0	0	0	0	0	0	0	0	0	0	0	0	0	0	0	0	0	0	0	0	0	0	0	0	0	0	0	0	0	0	0	0	0	0	0
AC012499.1	0	0	1.8747	0	0	0	0	3.1264	0	0	0	0	0	1.3195	0.9967	0	0	1.5328	0	0	0	0	0	0.9188	0	0	0.9132	0	0	4.3302	0.9077	0	0	0	0	0	0.9933	0.8912	2.713	0	0	0.779	0	0.782	0	0	0	0	0
AC012501.1	0	26.1789	13.1229	0	0	0	0	0	0	0	0	0	0	0	0	0	0	0	2.0345	3.6015	0	0	0	0	0	0	0	0	0	0	0	0	0	0	0	0	1.9866	0	0	0.7863	0	0	2.8127	0	0.8731	0	0	0	0
AC012501.2	2.5612	14.5438	15.935	0	0	4.9688	2.8817	1.0421	3.8645	0	0	0	0	0	0.9967	3.3718	1.3187	0.7664	5.0862	1.8008	3.1372	0.8836	3.7467	0.9188	0	1.2904	0	1.2756	2.4664	0	0	0.9511	0	3.1921	0	0	4.9664	0	1.0852	1.5727	1.7991	3.8952	3.7503	3.1279	1.7462	0	0	0	0
AC012501.3	19.2088	235.61	105.921	0	23.8568	42.2344	0	1.0421	20.2887	19.7109	6.7723	3.2766	2.2756	7.9169	1.9933	11.2393	0	5.3649	39.6727	0.9004	2.0915	13.2545	29.9733	10.1064	3.8117	6.452	3.6527	19.1337	0	2.1651	5.4459	8.56	0	1.5961	0	12.4272	21.8524	0	6.5113	17.2995	10.7946	64.6608	64.693	40.6629	9.6043	0	3.4101	0.7671	0
AC012506.1	0	0	0	0	1.4033	33.5391	0	1.0421	0	7.1676	0	10.922	7.9646	0	1.9933	2.2479	1.3187	4.5985	4.069	18.9079	7.3202	0	0	0	0	0	4.5659	0	0.8221	8.6603	1.8153	0.9511	0.9605	0.798	0	10.0971	0	8.9116	2.1704	2.359	1.7991	6.2324	0.9376	2.3459	4.3656	0.7983	0.682	1.5341	5.9282
AC012506.2	1.2806	46.5402	5.6241	0	0	109.312	23.0537	2.0843	0	16.1271	0	28.3973	31.8583	6.5974	9.9667	0	3.9562	21.4594	12.207	90.9381	20.915	1.7673	0	0	17.7879	9.0328	29.2216	5.1023	0	75.7777	3.6306	0	6.7236	8.7784	0.978	132.815	0	53.4698	4.3409	21.2312	18.8905	38.9523	4.6879	10.1657	24.4472	11.9743	4.0921	13.0401	29.6412
AC012506.3	0	26.1789	3.7494	0	2.8067	95.6485	8.6452	0	0	3.5838	0	25.1207	36.4095	2.639	9.9667	1.1239	1.3187	9.1969	14.2415	66.6279	25.098	1.7673	0	0.9188	11.4351	1.2904	28.3084	1.2756	0.8221	47.6317	3.6306	0	0.9605	8.7784	0.978	129.708	2.9799	16.9321	2.713	11.7951	11.6941	35.0571	7.5006	13.2936	20.9548	2.3949	2.0461	9.2048	5.9282
AC012506.4	0	0	0	0	0	1.2422	0	0	0	0	0	0	3.4134	0	0	1.1239	0	0	0	0	0	0.8836	0	0	0	0	0	0	0	2.1651	0	0	0	0	0	0	0.9933	0	0	0	1.7991	0	0	0	0	0	0	0	0
AC012507.3	0	0	0	0	1.4033	0	0	0	0	0	0	0	1.1378	0	0	0	0	0	2.0345	2.7011	1.0457	3.5345	1.8733	0.9188	0	0	0	0	0	0	0	0.9511	1.921	0.798	0	1.5534	0	0	1.0852	0	0	0	0	0	0	1.5966	0.682	1.5341	0
AC012507.4	0	0	0	3.3364	0	0	0	0	0	0	0	0	1.1378	0	0	0	0	0	0	0	0	0	0	1.8375	0	0	0	0	0.8221	0	0.9077	0	2.8815	0.798	0	0	0.9933	0	0	0	0.8995	0	0.9376	0	0	0.7983	0	0.7671	0
AC012512.1	0	2.9088	4.6868	4.4486	11.2267	1.2422	2.8817	0	4.8307	3.5838	9.4813	0	0	1.3195	0.9967	2.2479	1.3187	0.7664	2.0345	1.8008	0	4.4182	0.9367	0	5.0823	0	2.7395	0	2.4664	4.3302	0	2.8533	0	0.798	0.978	0.7767	1.9866	0	0.5426	0.7863	1.7991	1.5581	0	0.782	0	0	1.364	46.7908	0
AC012513.4	134.462	101.807	74.9881	58.9438	74.377	101.859	11.5269	57.3181	46.3742	69.884	102.94	69.9011	60.3033	55.4185	49.8334	86.5426	71.2109	40.6196	66.1212	40.517	69.0194	52.1342	59.9466	91.8763	59.7167	150.977	46.5719	45.9208	51.7948	59.5396	44.4751	45.6534	46.1047	43.8919	35.2085	44.2717	40.7249	24.0614	37.44	44.0351	37.781	56.8704	40.3159	39.8809	52.387	21.5537	32.0551	49.8591	5.9282
AC012513.6	0	0	0	0	0	0	0	0	0	0	0	0	0	0	0	0	0	0	0	0	0	0	0	0	0	0	0	0	0	0	0	0	0	0	0	0	0	0	0	0	0	0	0	0	0.8731	0	0	0	0
AC012531.25	227.945	267.606	169.661	288.046	280.668	382.594	126.796	102.13	146.852	170.23	105.648	300.356	250.316	221.674	434.548	297.841	452.321	241.419	257.364	191.78	122.353	195.282	127.386	410.687	275.713	507.127	215.509	258.942	155.385	231.663	165.193	293.894	215.155	181.952	134.966	181.747	279.115	130.11	259.91	176.927	156.521	159.704	120.948	239.286	171.131	149.279	196.423	91.2805	77.067
AC012593.1	1.2806	0	1.8747	15.5701	18.2434	2.4844	5.7634	0	2.8984	3.5838	8.1268	18.5675	3.4134	1.3195	0	7.8675	19.7808	27.5907	7.1207	2.7011	5.2287	12.3708	13.1133	5.5126	2.5411	3.8712	3.6527	3.8267	0	0	0.9077	0.9511	0	0	6.8461	4.6602	4.9664	1.7823	5.9687	0.7863	0	0	1.8752	20.3314	0	6.3863	0.682	0	0
AC012594.1	67.8713	0	0.9374	2.2243	0	0	2.8817	0	2.8984	1.7919	1.3545	0	4.5512	7.9169	15.9467	12.3632	0	10.7297	0	1.8008	0	12.3708	12.1767	11.0252	53.3638	9.0328	0.9132	11.4802	0.8221	19.4857	4.5383	27.5822	2.8815	3.1921	0.978	0	5.9597	0	4.3409	11.0088	1.7991	0	0	0	1.7462	0	10.2304	0	0
AC012603.1	0	0	0	0	0	0	0	0	0	0	0	0	0	0	0	0	0	0	0	0	0	0	0	0	0	0	0	0	0	0	0	0	0	0	0	0	0	0	0	0	0	0	0	0	0	0	0	0	0
AC012613.2	142.145	189.07	49.6796	57.8316	33.6802	67.0782	77.8064	71.9081	30.9162	57.3407	204.525	65.5322	101.264	89.7252	85.7135	159.598	155.609	90.4362	69.1729	121.551	61.6992	121.057	71.1866	79.9323	20.3291	78.7143	30.1348	68.8812	49.3284	53.0444	97.1191	19.0222	17.2893	55.8624	47.9227	47.3785	40.7249	70.402	67.8261	22.0176	183.508	67.777	18.7516	44.5728	13.9699	35.9228	18.4146	23.7789	5.9282
AC012627.1	0	0	0	0	0	0	0	0	0	0	0	0	0	0	0	0	0	0	0	0	0	0	0	0	0	0	0	0	0	0	0	0	0	0	0	0	0	0	0	0	0	0	0	0	0	0	0	0	0
AC012667.1	0	0	0	0	0	0	0	0	0	0	0	0	0	0	0	0	0	0	0	0	0	0	0	0	0	0	0	0	0	0	0	0	0	0	0	0	0	0	0	0	0	0	0	0	0	0	0	0	0
AC012668.1	0	0	0	0	0	0	0	0	0	0	0	0	0	1.3195	0	0	0	0	0	0	0	0	0	0	0	0	0	0	0	0	0	0	0	0	0	0	0	0	0	0	0	0	0	0	0	0	0	0	0
AC012668.2	0	0	0	2.2243	1.4033	0	0	1.0421	0.9661	0	14.8992	7.6454	0	6.5974	1.9933	2.2479	0	0	0	0.9004	0	0.8836	0.9367	2.7563	1.2706	3.8712	0	2.5512	18.0871	1.0825	0.9077	0.9511	0	0.798	0.978	0.7767	1.9866	0	0	0.7863	0	0.779	0.9376	0.782	0.8731	2.3949	0	1.5341	0
AC012668.3	0	0	0	0	0	0	0	0	0	0	0	0	0	0	0	0	0	0	0	0	0	0	0	0	0	0	0	0	0	0	0	0	0	0	0	0	0	0	0	0	0	0	0	0	0	0	0	0	0
AC012671.1	0	0	0	0	0	0	0	0	0	0	0	0	0	0	0	0	0	0	0	0	0	0	0	0	0	0	0	0	0	0	0	0	0	0	0	0	0	0	0	0	0	0	0	0	0	0	0	0	0
AC012671.2	0	0	0	0	0	0	0	0	0	0	0	0	0	0	0	0	0	0	0	0	0	0	0	0	0	0	0	0	0	0	0	0	0	0	0	0	0	0	0	0	0	0	0	0	0	0	0	0	0
AC012671.3	0	0	0	0	0	0	0	0	0	0	0	0	0	0	0	0	0	0	0	0	0	0	0	0	0	0	0	0	0	0	0	0	0	0	0	0	0	0	0	0	0	0	0	0	0	0	0	0	0
AC013248.2	0	0	0	0	0	0	0	0	0	0	0	0	0	0	0	0	0	0	0	0	0	0	0	0	0	0	0	0	0	0	0	0	0	0	0	0	0	0	0	0	0	0	0	0	0	0	0	0	0
AC013262.1	0	0	0.9374	0	0	0	0	0	0	0	0	0	0	0	0	0	0	0	0	0	0	0	0	4.5938	0	0	0	0	0	0	0	0	0	0	0	0	0	0	0	0	0	0	0	0	0	0	0	0	0
AC013264.2	3.8418	5.8175	4.6868	2.2243	11.2267	2.4844	2.8817	6.2529	0.9661	7.1676	1.3545	7.6454	6.8268	1.3195	2.99	6.7436	0	0.7664	9.1552	4.5019	6.2745	7.9527	6.5567	2.7563	7.6234	0	1.8263	2.5512	1.6443	3.2476	3.6306	5.7067	3.8421	3.1921	2.934	4.6602	2.9799	1.7823	5.9687	3.1454	0.8995	1.5581	6.5631	2.3459	0.8731	7.9828	3.4101	0	0
AC013267.1	6.4029	0	0.9374	0	1.4033	4.9688	0	0	0	0	1.3545	3.2766	2.2756	1.3195	0.9967	0	7.9123	0	1.0172	0	0	3.5345	0.9367	5.5126	1.2706	3.8712	0	0	0	0	1.8153	0	0	0	0	0	2.9799	0.8912	0.5426	1.5727	0	0.779	3.7503	0.782	0.8731	0	0	0.7671	0
AC013268.1	0	0	0	0	0	0	0	0	0	0	0	0	0	0	0	0	0	0	0	0	0	0	0	0	0	0	0	0	0	0	0	0	0	0	0	0	0	0	0	0	0	0	0	0	0	0	0	0	0
AC013268.3	0	0	0	0	14.0334	2.4844	11.5269	22.9272	5.7968	19.7109	0	16.3831	6.8268	0	6.9767	0	0	2.2992	0	21.609	2.0915	17.6726	5.62	0	0	11.6136	11.8713	0	0	12.9905	1.8153	1.9022	1.921	15.1627	10.7582	0	0	0	3.7983	1.5727	0	0	0	2.3459	25.3204	0	4.0921	0.7671	23.7129
AC013268.4	0	0	0	0	0	0	0	0	0	0	0	0	0	0	0	0	0	0	0	0	0	0	0	0	0	0	0	0	0	0	0	0	0	0	0	0	0	0	0	0	0	0	0	0.782	1.7462	0	0	0	0
AC013269.3	0	0	0	0	0	0	0	0	0	0	0	0	0	0	0	0	0	0	0	0	0	0	0	0	0	0	0	0	0	0	0	0	0	0	0	0	0	0	0	0	0	0	0	0	0	0	0	0	0
AC013269.4	0	0	0	0	0	0	0	0	0	0	0	0	0	0	0	0	0	0	0	0	0	0	0	0	0	0	0	0	0	0	0	0	0	0	0	0	0	0	0	0	0	0	0	0	0	0	0	0	0
AC013269.5	0	0	0	0	0	0	0	0	0	0	0	0	0	0	0	0	0	0	0	0	0	0	0	0	0	0	0	0	0	0	0	0	0	0	0	0	0	0	0	0	0	0	0	0	0	0	0	0	0
AC013271.3	64.0295	31.9964	80.6122	23.3551	2.8067	195.024	152.731	16.6744	15.4581	177.398	63.66	498.045	76.2325	50.1405	66.7768	11.2393	7.9123	54.415	122.07	266.512	3.1372	68.9232	37.4666	85.4449	644.178	320.019	229.207	21.6848	23.0199	37.8888	61.7206	167.396	49.9468	299.263	48.9007	18.6407	46.6846	22.2791	94.4139	18.8722	81.8588	54.5332	18.7516	2.3459	786.678	148.481	25.2349	12.273	130.421
AC013275.2	113.972	8.7263	9.3735	2.2243	2.8067	29.8125	0	0	0	1.7919	2.7089	21.8441	32.9961	38.2651	65.7801	30.3461	13.1872	46.7509	11.1897	35.1147	8.366	98.083	68.3766	54.207	44.4699	61.9391	20.0898	56.1254	5.755	53.0444	18.1531	25.68	72.0386	5.5862	21.5163	14.7572	41.7182	3.5647	35.2696	64.48	23.3882	12.4647	8.4382	4.6919	6.9849	22.352	40.2394	32.9837	5.9282
AC013399.3	0	0	0	0	0	0	0	0	0	0	0	0	0	0	0	0	0	0	0	0	0	0	0	0	6.3528	0	0	0	0	0	0	0	0	0	0	0	0	0	0	0	0	0	0	0	0	0	0	0	0
AC013401.1	0	0	0	0	0	0	0	0	0	0	1.3545	0	0	0	0	0	0	0	0	0	0	0	0	0.9188	0	0	0	0	0	0	0	0	0	0	0	0	0	0	0	0	0	0	0	0	0	0	0	0	0
AC013401.2	0	0	0	0	0	0	0	0	0	0	0	0	0	0	0	0	0	0	0	0	0	0	0	0	0	0	0	0	0	0	0	0	0	0	0	0	0	0	0	0	0	0	0	0	0	0	0	0	0
AC013402.1	0	0	0	0	0	0	0	0	0	0	0	0	0	0	0	0	0	0	0	0	0	0	0	0	0	0	0	0	0	0	0	0	0	0	0	0	0	0	0	0	0	0	0	0	0	0	0	0	0
AC013402.3	0	0	0	0	0	0	0	0	0	0	0	0	0	0	0	0	0	0	0	0	0	0	0	0	0	0	0	0	0	0	0	0	0	0	0	0	0	0	0	0	0	0	0	0	0	0	0	0	0
AC013402.4	0	0	0	0	0	0	0	0	0	0	0	0	0	0	0	0	0	0	0	0	0	0	0	0	0	0	0	0	0	0	0	0	0	0	0	0	0	0	0	0	0	0	0	0	0	0	0	0	0
AC013402.5	0	0	0	0	0	0	0	0	0	0	0	0	0	0	0	0	0	0	0	0	0	0	0	0	0	0	0	0	0	0	0	0	0	0	0	0	0	0	0	0	0	0	0	0	0	0	0	0	0
AC013403.13	0	0	0	0	0	0	0	0	0	0	0	0	0	0	0	0	0	0	0	0	0	0	0	0	0	0	0	0	0	0	0	0	0	0	0	0	0	0	0	0	0	0	0	0	0	0	0	0	0
AC013404.1	0	0	0	0	0	0	0	0	0	0	0	0	0	0	0	0	0	0	0	0	0	0	0	0	0	0	0	0	0	0	0	0	0	0	0	0	0	0	0	0	0	0	0	0	0	0	0	0	0
AC013406.1	0	0	0	0	0	0	0	0	0	0	0	0	0	0	0	0	0	0	0	0	0	0	0	0	0	0	0	0	0	0	0	0	0	0	0	0	0	0	0	0	0	0	0	0	0	0	0	0	0
AC013410.1	2.5612	31.9964	23.4338	13.3458	1.4033	0	0	0	9.6613	0	0	1.0922	0	0	0	1.1239	0	5.3649	13.2242	0	35.5555	0	14.05	0	0	6.452	22.8294	3.8267	9.0435	11.9079	21.7837	6.6578	1.921	2.3941	0	0	17.8792	3.5647	1.6278	51.8985	4.4977	0	14.0637	0	0.8731	0	12.2764	59.0638	0
AC013410.2	0	2.9088	0	2.2243	0	0	0	0	0	0	0	0	0	0	0	0	0	0	0	0	1.0457	0	0.9367	0	0	0	0	0	0.8221	1.0825	0.9077	0	0	0	0	0	0	0	0	0	0	0	0.9376	0	0	0	0	0.7671	0
AC013429.4	0	0	0	0	0	0	0	0	0	0	0	0	0	0	0	1.1239	0	1.5328	0	1.8008	0	0	0	0	0	0	0	0	0	1.0825	0.9077	0	0	0	0	0	0	0	0.5426	0.7863	0	0	0	0	0	0	0	0	0
AC013429.5	8.9641	2.9088	1.8747	4.4486	2.8067	8.6953	0	5.2107	5.7968	1.7919	10.8357	10.922	11.378	6.5974	2.99	7.8675	10.5498	4.5985	7.1207	0	7.3202	11.4872	9.3667	7.3501	7.6234	3.8712	8.2186	6.3779	6.5771	9.7428	12.7072	17.12	4.8026	3.9902	6.8461	10.8738	9.9329	8.9116	5.9687	11.0088	6.2968	10.1276	4.6879	9.3837	5.2387	3.1931	8.1843	2.3012	0
AC013436.6	0	0	0	0	0	0	0	0	0	0	0	0	0	0	0	0	0	0	0	0	0	0	0	0	0	0	0	0	0	0	0	0	0	0	0	0	0	1.7823	0	0	0	0	0	0	0	0	0	0	0
AC013437.2	2.5612	0	0	0	0	0	0	0	0	0	2.7089	1.0922	0	0	0	0	0	0	0	1.8008	0	0	0	0.9188	0	0	0	1.2756	0	0	0	0	0	0	1.956	0	0	0	0.5426	0	0.8995	0	0	0	0.8731	0	0	0.7671	0
AC013437.4	0	0	0	0	0	0	0	0	0	0	0	0	0	0	0	0	0	0	0	0	0	0	0	0	0	0	0	0	0	0	0	0	0	0	0	0	0	0	0	0	0	0.779	0	0	0	0	0	0	0
AC013437.6	0	0	0	0	0	0	0	0	0	0	4.0634	0	0	0	0.9967	0	0	0	0	0	0	0	0	0	0	0	0.9132	0	0	0	0	0	0	0	0	0	0	0	0	0	0	0.779	0	0	0	0	0	0	0
AC013437.7	0	0	0	0	0	0	0	0	0	0	0	0	0	0	0	0	0	0	0	0	0	0	0	0	0	0	0	0	0	0	0.9077	0	0	0	0	0	0	0	0	0	0	0	0	1.564	0	0	0	0	0
AC013439.4	0	0	1.8747	0	1.4033	1.2422	0	1.0421	0	0	0	0	3.4134	0	0	2.2479	0	0	3.0517	1.8008	2.0915	0	0	1.8375	1.2706	1.2904	1.8263	1.2756	0.8221	1.0825	0.9077	0	0	0	2.934	0	0	0	1.0852	0	0.8995	1.5581	0	3.1279	0.8731	3.1931	1.364	0	0
AC013442.1	0	0	0	0	0	0	0	0	0	0	0	1.0922	0	0	0	0	0	0	0	0	0	0	0	0	0	0	0	0	0	0	0	0	0	0	0	0	0	0	0	0	0	0	0	0	0	0	0	0	0
AC013444.1	7.6835	0	0	0	2.8067	2.4844	0	2.0843	2.8984	1.7919	5.4179	1.0922	1.1378	2.639	0	0	1.3187	0	13.2242	0	2.0915	0	8.43	2.7563	2.5411	0	0.9132	0	4.9328	4.3302	5.4459	5.7067	7.6841	2.3941	2.934	2.3301	0.9933	0	0.5426	3.1454	0	2.3371	0	0	0	0.7983	2.0461	0.7671	0
AC013444.2	0	0	0	0	0	0	0	0	0	0	0	0	0	0	0	0	0	0	0	0	0	0	0	0	0	0	0	0	0	0	0	0	0	0	0	0	0	0	0	0	0	0	0	0	0	0	0	0	0
AC013448.1	0	0	0	0	0	0	0	0	0	0	0	0	1.1378	0	0	0	0	0	0	0.9004	0	0	0	0	0	0	0	0	0	0	0	0	0	0	0	0	0	0	0	0	0	0.779	0	0	0	0	0	0	0
AC013448.2	1.2806	0	0	0	0	0	0	0	0	0	1.3545	0	0	0	0	0	0	0	0	0	0	0	0	0	0	0	0	0	0	0	0.9077	0	0	0	0	0	0	0	0.5426	0	0	0	0	0	0	0	0	0	0
AC013460.1	7.6835	0	0.9374	0	1.4033	0	0	0	0.9661	0	1.3545	0	3.4134	0	1.9933	1.1239	0	3.832	1.0172	5.4023	0	0	0.9367	10.1064	7.6234	6.452	0	2.5512	1.6443	1.0825	0	0.9511	0.9605	0	2.934	2.3301	0	0	5.4261	3.1454	1.7991	0	0	1.564	0	2.3949	4.0921	0	0
AC013463.2	482.782	29.0877	94.6725	23.3551	65.957	147.82	86.4515	4.1686	30.9162	8.9595	497.09	178.029	169.532	240.147	297.007	339.427	530.125	439.918	20.345	388.062	225.882	457.721	170.473	386.799	81.3163	1056.84	153.413	427.319	78.9255	211.095	260.497	188.32	8.6446	14.3646	65.527	326.99	204.618	288.737	370.602	320.827	203.298	63.8818	150.95	374.568	89.9309	36.7211	163.004	115.826	23.7129
AC013467.1	0	0	0	0	0	0	0	0	0	0	0	0	0	0	0	0	0	0	0	0	0	0	0	0	0	0	0	0	0	0	0	0	0	0	0	0	0	0	0	0	0	0	0	0	0	0	0	0	0
AC013470.6	5.1224	0	4.6868	1.1121	16.8401	1.2422	0	3.1264	11.5936	1.7919	12.1902	6.5532	2.2756	5.278	3.9867	3.3718	2.6374	4.5985	7.1207	0.9004	7.3202	4.4182	0.9367	1.8375	1.2706	6.452	2.7395	2.5512	3.2886	1.0825	0.9077	2.8533	6.7236	4.7882	2.934	5.4369	2.9799	1.7823	3.7983	4.718	1.7991	0.779	9.3758	21.1134	1.7462	0	3.4101	2.3012	11.8565
AC013470.8	1.2806	0	0	1.1121	5.6134	1.2422	0	0	0	0	0	0	0	0	0	0	2.6374	0	0	0	0	1.7673	0	0	0	1.2904	0	0	0	0	0	0	0	0	0	0.7767	0	0	0.5426	0.7863	0	0.779	0.9376	2.3459	0	0	0	1.5341	0
AC013472.3	26.8924	29.0877	8.4362	14.4579	14.0334	17.3906	8.6452	25.0115	4.8307	30.4623	21.6715	20.7519	14.7914	9.2364	14.95	11.2393	19.7808	9.9633	14.2415	22.5094	8.366	14.1381	10.3033	14.7002	22.8702	15.4848	9.1317	17.8581	6.5771	14.073	4.5383	13.3156	11.5262	5.5862	12.7142	12.4272	9.9329	7.1293	12.48	5.5044	4.4977	9.3486	4.6879	8.6018	3.4925	5.588	9.5483	5.3694	23.7129
AC013472.4	0	0	0	0	0	1.2422	0	0	0	0	0	0	0	0	0	0	0	0	0	0	0	0	0	0	0	0	0	0	0	0	0	0	0	0	0	0	0	0	0	0	0	0	0	0	0	0	0	0	0
AC013474.4	7.6835	34.9052	14.9976	16.6822	11.2267	21.1172	5.7634	40.6437	13.5258	43.0055	21.6715	22.9363	10.2402	21.1118	17.94	17.9829	11.8685	13.0289	21.3622	4.5019	20.915	13.2545	2.81	23.8878	10.1645	24.5176	21.9162	8.929	12.3321	17.3206	9.9842	8.56	24.9734	9.5764	9.7801	12.4272	4.9664	8.9116	9.2244	12.5815	11.6941	11.6857	5.6255	19.5495	9.6043	16.764	12.2764	13.0401	11.8565
AC013476.1	0	0	0	0	0	0	0	0	0	0	0	0	0	0	0	0	0	0	0	0	0	0	0	0	0	0	0	0	0	0	0	0	0	0	0	0	0	0	0	0	0	0	0	0	0	0	0	0	0
AC013477.1	0	0	0	0	0	0	0	0	0	0	0	0	0	0	0	0	0	0	0	0	0	0	0	0	0	0	0	0	0	0	0	0	0	0	0	0	0	0	0	0	0	0	0	0	0	0	0	0	0
AC013480.2	0	0	0	0	0	0	0	0	0	0	1.3545	0	0	0	0	0	0	0	0	0	0	0	0	0	0	0	0	0	0	0	0	0	0	0	0	0	0	0	0.5426	0	0	0	0	0	0	0	0	0	0
AC013717.3	0	0	0.9374	0	0	0	0	0	0	0	2.7089	0	0	0	0	2.2479	0	1.5328	0	0.9004	0	0	0	0	0	0	0	2.5512	1.6443	0	0	0	0	0	0	0	0	0	1.0852	0	0	0	0.9376	0	0	0	0	0	0
AC013727.1	0	0	0	0	0	0	0	0	0	0	0	0	0	0	0	0	0	0	0	0	0	0	0	0	0	0	0	0	0	0	0	0	0	0	0	0	0	0	0	0	0	0	0	0	0	0	0	0	0
AC013727.2	0	0	0	0	0	0	0	0	0	0	0	0	0	0	0	0	0	0	0	0	0	0	0	0	0	0	0	0	0	0	0	0	0	0	0	0	0	0	0	0	0	0	0	0	0	0	0	0	0
AC013733.3	0	0	0	0	0	0	0	0	0	0	0	0	0	0	0	0	0	0	0	0	0	0	0	0	0	0	0	0	0	0	0	0	0	0	0	0	0	0	0	0	0	0	0	0	0	0	0	0	0
AC013733.4	0	0	0	0	0	0	0	0	0	0	0	0	0	0	0	0	0	0	0	0	0	0	0	0	0	0	0	0	0	0	0	0	0	0	0	0	0	0	0	0	0	0	0	0	0	0	0	0	0
AC013733.5	1.2806	0	3.7494	2.2243	1.4033	8.6953	2.8817	1.0421	2.8984	0	4.0634	0	0	3.9585	3.9867	4.4957	0	6.8977	1.0172	0	3.1372	1.7673	0	0	0	3.8712	2.7395	2.5512	0.8221	5.4127	1.8153	1.9022	0.9605	0.798	0.978	0.7767	1.9866	0	1.0852	0.7863	0	2.3371	3.7503	0.782	3.4925	0	0.682	1.5341	0
AC013737.1	0	0	0	0	0	0	0	0	0	0	0	0	0	0	0	0	0	0	0	0	0	0	0	0	0	0	0	0	0	0	0	0	0	0	0	0	0	0	0	0	0	0	0	0	0	0	0	0	0
AC013751.1	0	0	0	0	0	0	0	0	0	0	0	0	0	0	0	0	0	0	0	0	0	0	0	0	0	0	0	0	0	0	0	0	0	0	0	0	0	0	0	0	0	0	0	0	0	0	0	0	0
AC015600.1	0	0	0	0	0	0	0	0	0	0	0	0	0	0	0	0	0	0	0	0	0	0	0	0	0	0	0	0	0	0	0	0	0	0	0	0	0	0	0	0	0	0	0	0	0	0	0	0	0
AC015688.3	0	0	0	2.2243	0	0	0	0	0	3.5838	0	4.3688	0	0	0	0	0	0	0	0	0	0	0	0	0	0	3.6527	0	0	2.1651	3.6306	3.8044	0	0	0	0	0	0	0	0	0	4.6743	0	0	2.6193	4.7897	1.364	2.3012	0
AC015691.13	51.2236	26.1789	22.4964	27.8037	29.4701	17.3906	25.9355	13.5479	22.221	39.4218	12.1902	29.4895	20.4804	19.7923	28.9034	31.47	51.4301	52.1158	15.2587	74.7313	14.6405	21.2071	32.7833	30.3192	29.2231	52.9063	21.9162	25.5116	4.1107	18.4031	15.4301	28.5333	21.1313	19.9509	19.5603	10.0971	19.8658	16.9321	28.7583	11.7951	24.2878	9.3486	5.6255	13.2936	13.0967	13.5708	27.963	13.0401	207.488
AC015726.1	11.5253	8.7263	1.8747	1.1121	4.21	8.6953	0	12.5058	3.8645	5.3757	9.4813	3.2766	5.689	1.3195	4.9833	2.2479	5.2749	2.2992	6.1035	2.7011	2.0915	3.5345	2.81	9.1876	6.3528	6.452	2.7395	3.8267	1.6443	3.2476	4.5383	6.6578	2.8815	4.7882	0.978	2.3301	3.9732	2.6735	4.3409	1.5727	3.5982	3.1162	1.8752	3.9099	2.6193	0	3.4101	5.3694	0
AC015818.6	0	0	0	0	0	0	0	0	0	0	0	0	0	0	0	0	0	0	0	0	0	0	0	0	0	0	0	0	0	0	0	0	0	0	0	0	0	0	0	0	0	0	0	0	0	0	0	0	0
AC015820.1	0	0	0	0	0	0	0	0	0	0	0	0	0	0	0	0	0	0	0	0	0	0	0	0	0	0	0	0	0	0	0	0	0	0	0	0	0	0	0	0	0	0	0	0	0	0	0	0	0
AC015849.13	7.6835	2.9088	6.5615	4.4486	5.6134	8.6953	2.8817	7.295	2.8984	16.1271	12.1902	3.2766	1.1378	10.5559	10.9634	2.2479	7.9123	6.1313	6.1035	8.1034	7.3202	1.7673	0.9367	1.8375	5.0823	6.452	4.5659	10.2046	3.2886	4.3302	4.5383	1.9022	5.7631	5.5862	3.9121	3.1068	0.9933	1.7823	9.2244	4.718	0.8995	3.1162	6.5631	6.2558	4.3656	1.5966	4.0921	3.8353	0
AC015849.14	1.2806	0	1.8747	0	0	2.4844	0	0	1.9323	3.5838	2.7089	3.2766	0	2.639	0	0	0	0	1.0172	0	2.0915	0	3.7467	1.8375	0	1.2904	0.9132	0	0.8221	1.0825	3.6306	0	0.9605	2.3941	0	0	0	0	0	0	0.8995	2.3371	0.9376	0.782	1.7462	1.5966	0	0	0
AC015849.15	2.5612	0	5.6241	1.1121	8.42	1.2422	5.7634	7.295	4.8307	5.3757	17.6081	3.2766	2.2756	9.2364	1.9933	3.3718	6.5936	1.5328	4.069	7.203	3.1372	11.4872	7.4933	7.3501	1.2706	2.5808	1.8263	5.1023	9.8657	1.0825	5.4459	1.9022	3.8421	5.5862	2.934	5.4369	2.9799	0.8912	5.4261	0.7863	2.6986	3.8952	4.6879	11.7297	0	6.3863	4.7742	1.5341	5.9282
AC015849.16	2.5612	2.9088	1.8747	1.1121	2.8067	1.2422	0	4.1686	0.9661	17.919	10.8357	5.461	2.2756	9.2364	6.9767	1.1239	3.9562	2.2992	5.0862	3.6015	5.2287	5.3018	7.4933	4.5938	5.0823	1.2904	4.5659	0	1.6443	2.1651	9.9842	7.6089	4.8026	11.9705	1.956	8.5437	6.953	5.347	3.2557	7.0771	4.4977	8.5695	3.7503	10.1657	2.6193	7.9828	2.7281	0.7671	0
AC015849.19	26.8924	23.2701	14.9976	25.5794	9.8234	24.8438	8.6452	13.5479	7.729	25.0866	37.9251	24.0285	12.5158	18.4728	11.96	22.4786	25.0557	26.0579	21.3622	28.8121	12.549	15.9054	16.86	23.8878	12.7057	27.0984	4.5659	7.6535	4.9328	8.6603	10.8919	9.5111	9.6052	17.5568	4.8901	13.2038	10.9262	7.1293	13.5652	5.5044	8.9955	5.4533	16.8764	14.0756	7.858	21.5537	5.4562	4.6024	11.8565
AC015849.2	0	0	1.8747	0	0	0	0	1.0421	0	0	0	1.0922	2.2756	0	0	1.1239	0	0	0	0	0	0.8836	0	1.8375	0	1.2904	0	0	0	1.0825	0	0	0	1.5961	0	0	0	0	0	0.7863	0	0	0	0.782	0	0	0	0	0
AC015884.1	0	0	0	0	0	0	0	0	0	0	0	0	0	0	0	0	0	0	0	0	0	0	0	0	0	0	0	0	0	0	0	0	0	0	0	0	0	0	0	0	0	0	0	0	0	0	0	0	0
AC015922.5	0	0	0	0	0	0	0	0	0	0	0	0	0	0	0	0	0	0	1.0172	0	0	0	0	0	0	0	0	0	0	0	0	0	0	0	0	0	0	0	0	0	0	0	0	0	0	0	0	0	0
AC015922.6	0	0	0	0	0	0	0	0	0	3.5838	0	0	1.1378	0	0	0	0	0	0	1.8008	0	0	0	0	1.2706	1.2904	0.9132	1.2756	0	0	0	0	0	0	0	0.7767	0	1.7823	0	0	0	1.5581	0	0	1.7462	0	0	0.7671	0
AC015922.7	0	0	0	1.1121	0	0	0	0	0	0	0	0	1.1378	0	0.9967	0	0	0	0	0	0	0	0	0.9188	0	0	0	0	0.8221	0	0	0	1.921	0	0	0	0	0	0.5426	0	0	0	0	0.782	0	0	0	0	0
AC015923.1	15.3671	5.8175	0.9374	3.3364	2.8067	6.2109	11.5269	5.2107	0	0	14.8992	3.2766	2.2756	0	2.99	5.6197	2.6374	3.0656	5.0862	0	4.183	4.4182	6.5567	11.9439	2.5411	6.452	0.9132	0	2.4664	1.0825	0.9077	0.9511	0.9605	0	0	0.7767	0.9933	0	1.6278	0	0.8995	1.5581	0	2.3459	0	0	1.364	1.5341	0
AC015933.2	1.2806	5.8175	1.8747	3.3364	2.8067	0	0	0	0.9661	0	0	1.0922	1.1378	0	1.9933	3.3718	3.9562	0.7664	3.0517	3.6015	1.0457	0	0	0	0	2.5808	6.3922	1.2756	2.4664	1.0825	1.8153	0.9511	0	1.5961	0.978	0	0.9933	0.8912	1.0852	0	1.7991	0.779	1.8752	1.564	0	0.7983	0	0	0
AC015969.3	0	0	1.8747	2.2243	1.4033	0	0	0	0	3.5838	0	2.1844	0	0	3.9867	0	3.9562	0	1.0172	0	0	0	0.9367	0	0	0	0	0	0.8221	0	0	1.9022	0	1.5961	0	1.5534	0	0	0.5426	0	0.8995	1.5581	0.9376	0	1.7462	1.5966	0	0	0
AC015971.1	0	0	0	0	0	0	0	0	0	0	0	0	0	0	0	0	0	0	0	0	0	0	0	0	0	0	0	0	0	0	0	0	0	0	0	0	0	0	0	0	0	0	0	0	0	0	0	0	0
AC015971.2	107.57	58.1753	23.4338	57.8316	50.5203	80.7422	2.8817	143.816	56.0355	66.3002	218.069	79.7309	29.5828	32.9872	40.8634	51.7008	80.4419	29.8899	47.8107	10.8045	53.3332	37.1125	65.5666	70.7447	45.7404	116.136	39.2665	58.6766	38.6406	37.8888	47.1981	50.4089	50.9073	29.5273	38.1426	34.9514	34.7651	16.9321	26.5878	28.3083	66.5665	34.278	79.6942	29.7152	18.3354	11.176	23.8708	36.052	5.9282
AC015977.5	0	0	0	0	0	1.2422	0	0	0	0	0	1.0922	0	0	0	0	1.3187	0	0	0.9004	0	0	0	0	0	0	0	0	0	0	0	0	0	0	0	0	0	0	0	1.5727	0	0	0	0	0	0.7983	0	0	0
AC015977.6	0	0	0	0	0	0	0	0	0	0	0	0	0	0	0.9967	0	0	0	0	0	1.0457	0	0	3.6751	0	2.5808	0	0	0	0	0	0	0.9605	0	0.978	1.5534	0.9933	0	0.5426	0	0.8995	0	0.9376	0	0	0	0	0	0
AC015987.1	12.8059	2.9088	9.3735	2.2243	2.8067	3.7266	0	4.1686	4.8307	3.5838	1.3545	8.7376	1.1378	5.278	2.99	5.6197	6.5936	3.832	5.0862	1.8008	4.183	7.9527	5.62	3.6751	3.8117	5.1616	0.9132	1.2756	1.6443	4.3302	5.4459	5.7067	3.8421	5.5862	0.978	3.1068	0	2.6735	5.9687	1.5727	3.5982	3.1162	2.8127	6.2558	3.4925	1.5966	3.4101	3.8353	0
AC016113.1	0	0	0	0	0	0	0	0	0	0	0	0	0	0	0	0	0	0	0	0	0	0	0	0	0	0	0	0	0	0	0	0	0	0	0	0	0	0	0	0	0	0	0	0	0	0	0	0	0
AC016194.1	0	0	0	0	0	0	0	0	0	0	0	0	0	0	0	0	0	0	0	0	0	0	0	0	0	0	0	0	0	0	0	0	0	0	0	0	0	0	0	0	0	0	0	0	0	0	0	0	0
AC016292.1	1.2806	5.8175	1.8747	0	2.8067	8.6953	0	0	1.9323	0	4.0634	5.461	2.2756	5.278	1.9933	1.1239	3.9562	0	3.0517	0	1.0457	1.7673	0.9367	1.8375	0	0	0.9132	1.2756	0.8221	2.1651	1.8153	0	0	0.798	0	1.5534	0	0	0	0	0	0	2.8127	1.564	0.8731	0	0	0.7671	0
AC016292.3	1.2806	26.1789	8.4362	12.2336	21.0501	16.1484	2.8817	9.3793	10.6274	12.5433	18.9626	12.0142	17.067	9.2364	4.9833	17.9829	10.5498	7.6641	9.1552	11.7049	15.6862	7.069	6.5567	9.1876	8.894	10.3232	11.8713	7.6535	9.8657	10.8254	5.4459	6.6578	6.7236	5.5862	12.7142	6.2136	4.9664	3.5647	9.2244	4.718	15.2923	5.4533	24.3771	10.1657	7.858	4.7897	3.4101	5.3694	5.9282
AC016405.1	1.2806	0	0	0	0	0	0	0	0	0	0	0	0	0	0	0	0	0	0	0	0	0	0	0	0	0	0	0	0	0	0	0	0	0	0	0	0	0	0	0	0	0	0	0	0	0	0	0	0
AC016543.1	0	0	0	0	0	0	0	0	0	0	0	0	0	0	0	0	0	0	0	0	0	0	0	0	0	0	0	0	0	0	0	0	0	0	0	0	0	0	0	0	0	0	0	0	0	0	0	0	0
AC016561.1	0	0	0	0	0	0	0	3.1264	0	0	0	0	0	0	0	0	0	0	0	0	0	2.6509	0	1.8375	1.2706	0	0	0	0	0	0	0	0	0	0.978	0	0	0	0.5426	0	0	0	0	0	0	0.7983	0	0	0
AC016575.1	0	0	0	0	0	0	0	0	0	0	0	0	0	0	0	0	0	0	0	0	0	0	0	0	0	0	0	0	0	0	0	0	0	0	0	0	0	0	0	0	0	0	0	0	0	0	0	0	0
AC016582.2	6.4029	23.2701	3.7494	7.785	19.6468	19.875	5.7634	0	16.4242	7.1676	9.4813	22.9363	35.2717	7.9169	11.96	29.2222	25.0557	20.693	6.1035	11.7049	7.3202	3.5345	9.3667	12.8627	53.3638	18.0656	7.3054	19.1337	13.9764	10.8254	16.3378	9.5111	5.7631	8.7784	3.9121	5.4369	15.8926	6.2381	10.3096	13.3678	12.5937	2.3371	4.6879	0	6.1118	3.9914	2.7281	4.6024	0
AC016597.1	0	0	0	0	0	0	0	0	0	0	0	0	0	0	0	0	0	0	0	0	0	0	0	0	0	0	0	0	0	0	0	0	0	0	0	0	0	0	0	0	0	0	0	0	0	0	0	0	0
AC016629.3	2.5612	20.3614	0.9374	5.5607	5.6134	19.875	0	0	8.6952	7.1676	1.3545	9.8298	7.9646	2.639	6.9767	4.4957	17.1434	3.0656	6.1035	0	8.366	7.069	4.6833	9.1876	8.894	9.0328	6.3922	8.929	1.6443	6.4952	4.5383	6.6578	3.8421	0.798	6.8461	5.4369	0.9933	0.8912	1.6278	5.5044	0.8995	6.2324	6.5631	10.1657	5.2387	1.5966	1.364	2.3012	0
AC016629.7	3.8418	5.8175	1.8747	6.6729	2.8067	1.2422	8.6452	1.0421	0	0	2.7089	5.461	0	5.278	7.9733	5.6197	1.3187	2.2992	3.0517	9.0038	2.0915	3.5345	5.62	0.9188	0	1.2904	1.8263	0	0.8221	3.2476	0	2.8533	0	0	0.978	2.3301	0	0.8912	1.6278	3.9317	0.8995	0.779	0.9376	0.782	0.8731	1.5966	0.682	2.3012	0
AC016644.1	8.9641	0	2.8121	5.5607	5.6134	1.2422	0	5.2107	1.9323	0	2.7089	5.461	4.5512	1.3195	0.9967	7.8675	3.9562	1.5328	5.0862	0	1.0457	6.1854	0.9367	1.8375	6.3528	1.2904	6.3922	1.2756	1.6443	1.0825	0	0	2.8815	2.3941	0	0	0.9933	2.6735	2.713	2.359	2.6986	0.779	1.8752	3.9099	2.6193	3.1931	0	1.5341	5.9282
AC016670.1	0	0	0	0	0	0	0	0	0	0	0	0	0	0	0	0	0	0	0	0	0	0	0	0	0	0	0	0	0	0	0	0	0	0	0	0	0	0	0	0	0	0	0	0	0	0	0	0	0
AC016682.1	0	0	0	0	0	0	0	0	0	0	0	0	0	0	0	0	0	0	0	0	0	0	0	0	0	0	0	0	0	0	0	0	0	0	0	0	0	0	0	0	0	0	0	0	0	0	0	0	0
AC016683.5	2.5612	0	4.6868	5.5607	0	6.2109	2.8817	1.0421	0.9661	3.5838	1.3545	2.1844	1.1378	10.5559	3.9867	1.1239	0	2.2992	0	2.7011	3.1372	3.5345	4.6833	9.1876	10.1645	5.1616	1.8263	3.8267	0.8221	1.0825	3.6306	0	0.9605	0.798	0.978	1.5534	3.9732	0.8912	2.713	0.7863	0.8995	2.3371	1.8752	3.1279	0.8731	2.3949	2.7281	0	0
AC016691.2	0	0	0	0	0	0	0	0	0	0	1.3545	0	0	0	0	0	0	0	0	0	2.0915	0	0	0.9188	1.2706	0	0.9132	0	0	0	0	0	0.9605	1.5961	1.956	0.7767	0	0	0	0	0	0	0	0	0	0	0	0	0
AC016694.2	0	0	0	0	0	0	0	0	0	0	0	0	0	0	0	0	0	0	0	0	0	0	0	0.9188	0	0	0	0	0	0	0	0	0	0	0	0	0	0	0	0	0	0	0	0	0	0	0	0	0
AC016696.1	0	0	0	0	0	0	0	1.0421	0	0	1.3545	0	0	0	0	0	0	0	0	0	0	0	0	0	0	0	0	0	0	0	0	0	0	0	0	0	0	0	0	0	0	0	0	0	0	0	0	0	0
AC016697.1	0	0	0	0	0	0	0	0	0	0	0	0	0	0	0	0	0	0	0	2.7011	0	0	0	0	0	0	0	0	0	0	0	0	0	0	0	0	0	0	0	0	0	0	0	0	0	0.7983	0.682	0.7671	0
AC016697.2	3.8418	8.7263	2.8121	6.6729	1.4033	1.2422	5.7634	1.0421	2.8984	8.9595	1.3545	8.7376	1.1378	3.9585	4.9833	1.1239	3.9562	2.2992	9.1552	6.3026	2.0915	1.7673	0.9367	2.7563	0	6.452	0.9132	5.1023	1.6443	1.0825	2.723	0.9511	2.8815	4.7882	3.9121	1.5534	3.9732	0.8912	4.8835	3.1454	0	3.1162	1.8752	1.564	0.8731	3.9914	0.682	1.5341	0
AC016700.2	1.2806	5.8175	0.9374	2.2243	1.4033	3.7266	8.6452	0	2.8984	3.5838	2.7089	0	1.1378	0	2.99	0	2.6374	0.7664	2.0345	0	0	0.8836	0	0	0	0	0.9132	2.5512	0	0	0	0	0	0	1.956	1.5534	0	0	0	0	0.8995	0	0	0	0	1.5966	0	0	0
AC016700.4	0	0	0	0	0	0	0	1.0421	0	0	0	0	0	0	0	0	0	0.7664	0	0	0	0	1.8733	0	0	0	0	1.2756	0	0	0	0	0	0	0	0	0.9933	0	0.5426	0	0	0	0	0	0	0	0	0	0
AC016700.5	3.8418	34.9052	10.3109	7.785	7.0167	4.9688	8.6452	32.3066	5.7968	10.7514	5.4179	16.3831	2.2756	6.5974	4.9833	4.4957	2.6374	6.8977	7.1207	15.3064	5.2287	6.1854	1.8733	1.8375	7.6234	12.904	5.479	2.5512	3.2886	4.3302	3.6306	3.8044	5.7631	12.7686	4.8901	12.4272	2.9799	14.2586	11.9374	4.718	1.7991	14.8019	30.0025	0	6.1118	3.9914	6.8202	1.5341	11.8565
AC016700.6	0	0	0	0	0	0	0	0	0	0	0	0	0	0	0	0	0	0	0	0	0	0	0	0	0	0	0	0	0	0	0	0	0	0	0	0	0	0	0	0	0	0	0	0	0	0	0	0	0
AC016706.1	0	0	0	0	0	0	0	0	0	0	0	0	0	0	0	0	0	0	0	0	0	0	0	0	0	0	0	0	0	0	0	0	0	0	0	0	0	0	0	0	0	0	0	0	0	0	0	0	0
AC016708.2	0	0	0	1.1121	0	0	0	0	0.9661	0	1.3545	0	0	0	0.9967	0	0	0	0	0	0	0	0	0	2.5411	0	0	3.8267	0.8221	1.0825	0.9077	2.8533	0	1.5961	0	0	0	0	0	0	2.6986	0	0.9376	0	0	0	0	0.7671	0
AC016710.1	0	0	0	0	0	0	0	0	0	0	0	0	0	0	0	0	0	0	0	0	0	0	0	0	0	0	0	0	0	0	0	0	0	0	0	0	0	0	0	0	0	0	0	0	0	0	0	0	0
AC016712.1	1.2806	87.263	29.9952	1.1121	49.1169	7.4531	2.8817	1.0421	11.5936	0	9.4813	2.1844	20.4804	5.278	6.9767	15.735	13.1872	7.6641	40.6899	2.7011	5.2287	9.7199	22.48	1.8375	21.5997	2.5808	5.479	0	30.4192	2.1651	16.3378	0.9511	0	2.3941	2.934	27.9611	4.9664	44.5582	3.7983	37.7444	5.3973	38.1733	64.693	51.6106	3.4925	1.5966	11.5944	32.2166	0
AC016712.2	0	2.9088	5.6241	2.2243	1.4033	9.9375	2.8817	1.0421	2.8984	0	2.7089	1.0922	5.689	2.639	0.9967	5.6197	3.9562	3.0656	2.0345	0	2.0915	0.8836	1.8733	0.9188	0	2.5808	1.8263	2.5512	6.5771	0	1.8153	5.7067	0	0.798	0.978	3.8835	1.9866	4.4558	1.0852	7.0771	2.6986	3.1162	3.7503	19.5495	1.7462	0.7983	1.364	2.3012	0
AC016712.3	0	0	0	0	0	0	0	0	0	0	0	0	0	0	0	0	0	0	0	0	0	0	0	0	0	0	0	0	0	0	0	0	0	0	0	0	0	0	0	0	0	0	0	0	0	0	0	0	0
AC016716.1	1.2806	0	0	0	1.4033	0	2.8817	3.1264	0.9661	0	2.7089	4.3688	0	1.3195	0	1.1239	3.9562	0	0	0	0	0.8836	0	0	0	1.2904	0	0	1.6443	0	2.723	1.9022	3.8421	0	0	0	0	0	0	1.5727	1.7991	0	1.8752	1.564	0	0	1.364	1.5341	0
AC016716.2	0	0	0	0	0	0	0	2.0843	0.9661	1.7919	0	6.5532	0	0	0.9967	0	0	0	0	0	0	0	0	0	0	0	0	0	0	0	0	0	0	0.798	0	0	0	0	0	0	0	0	0	0.782	0	0	0	0	0
AC016717.1	0	0	0	0	0	0	0	0	0	0	0	1.0922	0	0	0.9967	0	0	0	0	0	0	1.7673	0	0.9188	0	0	0.9132	0	3.2886	0	0	0	0	0	0	0	0	0	0	0	0	0	0	0	0	0	0	0	0
AC016722.3	0	0	0	2.2243	0	0	5.7634	0	0	0	0	0	0	0	1.9933	0	0	0.7664	1.0172	0	0	0	0	0	0	0	0	0	0	0	0	0	0	0.798	0	0	0	0	0.5426	0	0	0	0	0	0	0.7983	0	0	0
AC016722.4	65.3101	69.8104	30.9326	37.813	18.2434	43.4766	17.2903	12.5058	34.7807	35.838	56.8877	53.518	27.3072	25.0703	35.8801	24.7265	60.6611	25.2915	34.5865	11.7049	23.0065	25.6253	35.5933	44.1006	26.6819	72.2623	22.8294	24.236	10.6878	21.6508	21.7837	16.1689	22.0918	15.1627	20.5383	12.4272	25.8255	19.6056	26.0452	17.2995	27.886	18.6971	15.0013	18.7675	15.7161	19.9571	19.7787	23.7789	0
AC016723.4	0	0	0	0	0	0	0	0	0.9661	0	1.3545	5.461	0	1.3195	2.99	2.2479	1.3187	0.7664	0	0.9004	1.0457	0	0	0	0	0	0.9132	0	3.2886	0	0.9077	1.9022	0	3.9902	0	0	0	0.8912	0	1.5727	0.8995	0	0.9376	0	3.4925	0	0.682	2.3012	0
AC016724.6	0	0	0.9374	0	0	0	0	0	0	0	0	0	0	0	0	0	0	0	0	0	0	0	0	0	0	1.2904	0	0	0	0	0	0	0	0	0	0	0	0	0	0	0	0	0	0	0	0	0	0	0
AC016727.1	0	0	0	0	0	0	0	0	0	0	0	0	0	0	0	0	0	0	0	0	0	0	0	0	0	0	0	0	0	0	0	0	0	0	0	0	0	0	0	0	0	0	0	0	0	0	0	0	0
AC016727.3	0	0	0	0	0	0	0	0	0	0	0	0	0	0	0	0	0	0	0	0	0	0	0	0	0	0	0	0	0	0	0	0	0	0	0	0	0	0	0	0	0	0	0	0	0	0	0	0	0
AC016730.1	0	0	0	0	0	0	0	0	0	0	1.3545	0	0	0	0	0	0	0.7664	0	0	0	0	0	0	0	1.2904	0	0	0	0	0	0	0	1.5961	0	0	0	0	0	0.7863	0.8995	0	0	0	0	0	0	0	0
AC016732.2	0	0	1.8747	0	0	0	0	0	0	0	2.7089	0	1.1378	0	0	0	1.3187	0	0	0	0	0.8836	0	0	1.2706	0	0	0	0	0	0	0	0	0	0	0	0.9933	0	1.0852	0	0.8995	0	0	0	0	0	0	0	0
AC016734.2	1.2806	5.8175	4.6868	1.1121	8.42	2.4844	2.8817	10.4215	0.9661	1.7919	6.7723	0	5.689	1.3195	3.9867	5.6197	1.3187	4.5985	3.0517	3.6015	5.2287	3.5345	13.1133	2.7563	10.1645	2.5808	1.8263	1.2756	1.6443	8.6603	7.2612	7.6089	3.8421	2.3941	11.7362	3.8835	0.9933	2.6735	2.1704	0	5.3973	3.1162	3.7503	3.1279	3.4925	1.5966	2.0461	3.8353	0
AC016735.1	0	0	0	0	0	0	0	0	0	0	0	0	0	0	0	0	0	0	0	0	0	0	0	0	0	0	0	0	0	0	0	0	0	0	0	0	0	0	0	0	0	0	0	0.782	0	0	0	0	0
AC016735.2	8.9641	2.9088	7.4988	2.2243	1.4033	0	0	0	0.9661	3.5838	0	3.2766	3.4134	7.9169	5.98	1.1239	1.3187	0.7664	1.0172	5.4023	0	1.7673	1.8733	4.5938	2.5411	0	3.6527	5.1023	0	0	0	0	2.8815	0.798	0.978	0.7767	0	0	0.5426	0.7863	0	0	0	0.782	0	1.5966	2.7281	0	0
AC016735.3	0	0	0	0	0	0	0	1.0421	0	0	0	0	0	2.639	0.9967	0	0	0	0	0	0	0	0.9367	0.9188	0	0	0	0	0	0	0	0	0	0	0	0	0	0	0	0	0	0	0	0	0	0	0	0	0
AC016737.1	3.8418	0	1.8747	0	0	0	0	0	0	5.3757	0	0	1.1378	0	0	0	0	0	0	0	1.0457	0	0	0	0	0	0	0	0	0	0	0	0	0	0	0	0	0	0	0	0	0	0	0	0	0	0	0	0
AC016738.3	25.6118	14.5438	5.6241	2.2243	4.21	24.8438	0	8.3372	0	14.3352	2.7089	5.461	4.5512	3.9585	6.9767	5.6197	10.5498	8.4305	5.0862	8.1034	5.2287	8.8363	3.7467	5.5126	6.3528	2.5808	8.2186	3.8267	0.8221	4.3302	3.6306	4.7556	2.8815	7.9803	0.978	3.1068	3.9732	3.5647	3.7983	4.718	2.6986	2.3371	0.9376	3.1279	0	1.5966	2.0461	1.5341	0
AC016738.4	70.4324	46.5402	16.8723	17.7944	22.4534	157.758	0	57.3181	7.729	177.398	9.4813	84.0997	86.4727	34.3067	71.7601	31.47	96.2666	32.9556	16.276	24.3102	26.1437	30.0434	15.9233	28.4816	20.3291	41.2928	22.8294	21.6848	12.3321	88.7681	10.8919	20.9245	19.2103	11.1725	7.8241	28.7378	21.8524	37.4289	29.3009	35.3854	10.7946	26.4876	14.0637	22.6774	1.7462	15.9657	17.7326	8.4377	11.8565
AC016739.1	0	0	0	0	0	0	0	0	0.9661	0	0	0	0	0	0	0	1.3187	0	0	0	0	0	0	0	0	0	0	0	0	0	0	0	0	0	0	0	0	0	0	0	0	0	0	0	0	0	0	0	0
AC016739.2	44.8206	183.252	100.297	42.2616	54.7303	40.9922	247.828	48.9809	30.9162	64.5083	48.7609	37.1349	55.7521	55.4185	43.8534	46.0811	71.2109	35.2548	57.9832	36.0151	54.3789	57.436	67.4399	19.294	62.2578	15.4848	32.8743	19.1337	36.9963	37.8888	59.9053	85.6	37.4601	51.8723	33.2525	38.0582	39.7316	25.8438	37.44	25.1629	90.8543	44.4056	127.511	27.3693	28.8128	37.5193	18.4146	19.9436	5.9282
AC016739.3	0	0	0	0	0	0	0	0	0	0	0	0	0	0	0	0	0	0	0	1.8008	0	0	0	0	0	0	0	0	0	0	0	0	0	0	0	0	0	0	0	0	0	0	0	0	0	0	0	0	0
AC016745.3	0	0	0	0	0	0	0	0	0	0	2.7089	0	0	0	0	0	0	0	2.0345	0	0	0	0.9367	0.9188	0	1.2904	0	0	0	0	0	0	0	0	0	0	0	0	0	0	0	0	0	0.782	0	0	0	0	0
AC016747.3	37.1371	90.1717	67.4893	63.3924	102.444	45.961	259.355	40.6437	91.7824	37.6299	104.294	50.2414	133.122	72.5718	63.7868	96.658	71.2109	88.9034	68.1557	75.6317	80.5227	65.3887	75.8699	65.2321	72.4224	110.974	87.6648	79.0858	67.4155	103.924	91.6732	79.8934	30.7365	102.947	106.604	68.3493	72.5102	197.838	85.7322	134.464	64.7674	119.973	124.698	108.695	119.617	61.4679	56.608	158.015	154.134
AC016751.2	0	0	0	0	0	0	0	0	0	0	0	0	0	0	0	0	0	0	0	0	0	0	0	0	0	0	0	0	0	0	0	0	0	0	0	0	0	0	0	0	0	0	0	0	0	0	0	0	0
AC016751.3	0	0	0	0	0	0	0	0	0	0	0	0	0	0	0	0	0	0	0	0	0	0	0	0	0	0	0	0	0	0	0	0	0	0	0	0	0	0	0	0	0	0	0	0	0	0	0	0	0
AC016753.7	0	0	0	0	1.4033	0	0	3.1264	0	5.3757	0	5.461	0	0	0	0	0	1.5328	0	0	1.0457	0.8836	0	0.9188	2.5411	1.2904	0	0	0	1.0825	0	0	0	2.3941	0	0	0	0	0	0	0	0	0.9376	0	0	0	0	0.7671	0
AC016757.3	7.6835	31.9964	13.1229	7.785	7.0167	9.9375	23.0537	5.2107	40.5775	12.5433	2.7089	27.3051	23.8938	6.5974	18.9367	14.6111	6.5936	17.6274	7.1207	11.7049	9.4117	10.6036	5.62	11.0252	8.894	9.0328	1.8263	10.2046	1.6443	19.4857	8.1689	10.4622	13.4472	10.3745	1.956	3.8835	13.9061	9.8028	15.193	13.3678	10.7946	8.5695	3.7503	0.782	5.2387	7.1846	5.4562	9.9718	53.3541
AC016764.1	0	0	0	0	0	0	0	0	0	0	0	0	0	0	0	0	0	0	0	0	0	0	0	0	0	0	0	0	0	0	0	0	0	0	0	0	0	0	0	0	0	0	0	0	0	0	0	0	0
AC016768.1	0	17.4526	2.8121	0	0	98.1329	0	0	0	5.3757	0	21.8441	22.756	3.9585	6.9767	2.2479	1.3187	8.4305	8.138	25.2106	16.732	2.6509	0.9367	2.7563	2.5411	5.1616	14.6108	1.2756	2.4664	20.5682	4.5383	0.9511	0	3.9902	0	37.2815	0.9933	12.4763	3.7983	14.1541	1.7991	17.9181	5.6255	5.4739	11.3505	0.7983	5.4562	5.3694	0
AC016772.4	0	0	0.9374	0	1.4033	0	0	0	2.8984	0	0	0	0	0	0	2.2479	5.2749	0	0	0	0	0	1.8733	0.9188	3.8117	0	1.8263	0	0	0	0	0	0	0	0	0	0	0	0	2.359	0	0	0	1.564	0	1.5966	1.364	1.5341	0
AC016821.1	0	0	0	0	0	0	0	0	0	0	0	0	0	0	0	0	0	0	0	0	0	0	0	0	0	0	0	0	0	0	0	0	0	0	0	0	0	0	0	0	0	0	0	0	0	0	0	0	0
AC016831.3	0	20.3614	3.7494	1.1121	2.8067	0	0	13.5479	0	0	0	1.0922	1.1378	0	0	0	0	0	4.069	0	1.0457	0.8836	0	0	0	1.2904	0	0	0	0	0	0	0	0.798	0	0	2.9799	0	0	1.5727	0	0	7.5006	0	0	0	0	0.7671	0
AC016831.5	0	8.7263	0	0	0	0	0	3.1264	0	0	0	0	0	0	0.9967	0	0	0	0	0	0	0	1.8733	0	0	0	0	1.2756	0	0	0	0	0	0	0	0	0	0	0	0.7863	0	0	5.6255	0	0	0	0	0	0
AC016831.6	1.2806	20.3614	5.6241	0	9.8234	0	0	27.0958	0.9661	7.1676	2.7089	3.2766	1.1378	0	0	0	0	0	6.1035	0.9004	0	1.7673	0	1.8375	0	3.8712	0.9132	0	0	3.2476	0.9077	0	1.921	0.798	0	0	5.9597	0	0.5426	5.5044	0	0	18.7516	0.782	0.8731	1.5966	2.7281	4.6024	0
AC016831.7	644.137	264.698	238.087	191.289	182.434	182.602	172.903	427.28	170.039	232.947	367.061	285.065	164.981	274.454	196.344	177.581	428.584	171.675	204.467	190.88	128.627	139.614	198.573	264.604	208.373	209.045	108.668	164.55	125.787	126.657	147.04	158.836	143.117	82.9956	157.46	112.621	137.074	130.11	151.388	113.233	190.704	119.194	92.8203	101.657	83.8191	167.64	122.082	88.9793	100.78
AC016894.1	17.9283	14.5438	8.4362	4.4486	4.21	9.9375	2.8817	11.4636	6.7629	10.7514	12.1902	5.461	5.689	7.9169	2.99	7.8675	3.9562	3.0656	12.207	5.4023	4.183	6.1854	6.5567	5.5126	1.2706	0	3.6527	3.8267	3.2886	4.3302	1.8153	2.8533	7.6841	6.3843	2.934	6.2136	2.9799	2.6735	2.1704	4.718	1.7991	4.6743	2.8127	2.3459	1.7462	5.588	1.364	3.8353	0
AC016903.1	0	0	0	0	0	0	0	0	0	0	0	0	0	0	0	0	0	0	0	2.7011	0	0	0	0	0	0	0	0	0	0	0	0	0	0	0	0	0	0	0	0	0	0	0	0	0	0	0	0	0
AC016903.2	0	0	0	0	0	0	0	0	0	0	0	0	0	0	0	0	0	0	0	0	0	0	0	0	0	0	0	0	0	0	0	0	0	0	0	0	0	0	0	0	0	0	0	0	0	0.7983	0	0	0
AC016907.1	0	0	0	0	0	0	0	0	0	0	0	0	0	0	0	0	0	0	0	0	0	0	0	0	0	0	0	0	0	0	0	0	0	0	0	0	0	0	0	0	0	0	0	0	0	0	0	0	0
AC016907.2	0	0	0	0	0	1.2422	0	0	0	0	0	0	0	0	0	0	0	0	0	0	0	0	0	0.9188	0	0	0	0	0	0	0	0	0	0	0	0	0	0	0	0	0	0	0	0	0	0	0	0	0
AC016907.3	5.1224	8.7263	3.7494	2.2243	4.21	17.3906	0	5.2107	5.7968	12.5433	5.4179	6.5532	17.067	5.278	6.9767	3.3718	10.5498	7.6641	5.0862	14.406	9.4117	7.9527	5.62	4.5938	11.4351	20.6464	3.6527	3.8267	3.2886	14.073	4.5383	5.7067	7.6841	7.1823	2.934	8.5437	5.9597	8.0205	2.1704	3.1454	7.1964	10.9066	7.5006	7.0378	6.9849	1.5966	6.8202	4.6024	0
AC016908.1	0	0	0	0	2.8067	0	0	0	0	0	0	0	0	0	0	0	0	0	0	4.5019	0	0	0	0.9188	0	0	0	0	0	0	0	0	0	0	0	0	0	0	0	0	0	0	0	0	0	0	0	0	0
AC016909.1	44.8206	244.336	33.7446	5.5607	11.2267	34.7813	0	76.0767	10.6274	53.7569	5.4179	29.4895	12.5158	27.7092	28.9034	28.0983	11.8685	10.7297	50.8624	6.3026	12.549	7.069	14.9866	21.1315	8.894	47.7448	10.9581	26.7871	8.2214	17.3206	15.4301	10.4622	14.4077	14.3646	5.8681	6.2136	40.7249	7.1293	13.5652	28.3083	17.9909	8.5695	57.1923	24.2413	14.843	4.7897	20.4607	26.0801	0
AC016909.2	0	2.9088	0	0	1.4033	1.2422	0	2.0843	0	0	1.3545	0	0	1.3195	0	0	1.3187	0	3.0517	0	0	0	0	0.9188	1.2706	1.2904	0	0	0	0	0	0	0	0.798	0	0	0	0	1.0852	0	0	0.779	0.9376	0	0	0	0	0	0
AC016910.1	5.1224	0	0.9374	4.4486	1.4033	4.9688	2.8817	7.295	2.8984	7.1676	4.0634	3.2766	1.1378	2.639	5.98	3.3718	1.3187	1.5328	7.1207	3.6015	0	5.3018	1.8733	8.2689	5.0823	5.1616	4.5659	5.1023	0	3.2476	3.6306	2.8533	5.7631	3.9902	1.956	2.3301	0.9933	3.5647	3.2557	1.5727	0.8995	3.1162	0.9376	2.3459	1.7462	3.9914	2.0461	2.3012	11.8565
AC016912.3	0	0	0	0	0	0	0	1.0421	0.9661	1.7919	0	3.2766	0	0	0	0	0	0	1.0172	0.9004	0	0.8836	0	0.9188	0	0	0	0	0	1.0825	0	0	0	0	0	0	0	0	0	0	0	0	0	0	0	0	1.364	0	0
AC016970.1	0	0	0	0	0	0	0	0	0	0	0	0	0	0	0	0	0	0	0	0	0	0	0	0	0	0	0	0	0	0	0	0	0	0	0	0	0	0	0	0	0	0	0	0	0	0	0	0	0
AC016993.1	0	0	0	0	0	0	0	0	0	0	0	0	0	0	0	0	0	0	0	0	0	0	0	0	0	0	0	0	0	0	0	0	0	0	0	0	0	0	0	0	0	0	0	0	0	0	0	0	0
AC016994.2	2.5612	2.9088	0	0	1.4033	0	0	0	4.8307	1.7919	4.0634	0	0	2.639	0	0	0	0	4.069	0	3.1372	0	0	0.9188	1.2706	0	0	0	0	0	0.9077	0.9511	0	0	0	0	0	0	1.0852	3.1454	0	0.779	0	0	0	0.7983	0	0	0
AC016995.3	3.8418	5.8175	13.1229	3.3364	2.8067	7.4531	17.2903	61.4867	1.9323	16.1271	14.8992	25.1207	10.2402	2.639	6.9767	5.6197	7.9123	3.832	15.2587	17.1072	9.4117	6.1854	2.81	11.0252	2.5411	7.7424	6.3922	8.929	4.1107	6.4952	1.8153	8.56	0.9605	14.3646	2.934	6.9903	10.9262	8.9116	5.9687	6.2907	6.2968	7.7905	16.8764	9.3837	14.843	9.5794	11.5944	27.6143	11.8565
AC016999.2	1.2806	31.9964	0	5.5607	4.21	2.4844	5.7634	7.295	3.8645	14.3352	9.4813	9.8298	9.1024	1.3195	5.98	2.2479	13.1872	2.2992	2.0345	3.6015	1.0457	2.6509	3.7467	2.7563	1.2706	3.8712	0	1.2756	0.8221	3.2476	0	1.9022	4.8026	0	0	2.3301	7.9463	8.9116	5.4261	2.359	1.7991	2.3371	0	3.9099	4.3656	12.7725	4.0921	3.8353	35.5694
AC017002.1	646.698	69.8104	103.109	223.542	143.141	26.0859	48.9892	56.2759	134.292	59.1326	727.35	36.0427	30.7206	138.546	20.93	43.8333	122.641	20.693	44.7589	99.9418	31.3725	40.647	189.207	52.3695	58.4461	58.0679	21.9162	14.0314	45.2177	22.7333	41.7521	25.68	66.2755	29.5273	63.5709	26.4077	20.8591	10.694	55.3461	14.9405	63.8678	21.8133	26.2522	18.7675	7.858	154.069	78.4327	31.4496	0
AC017002.2	1736.48	127.986	210.904	279.149	343.818	122.977	37.4623	111.51	269.55	78.8435	1550.87	67.7166	83.0593	226.952	30.8967	98.9059	287.481	39.8532	69.1729	166.57	77.3854	76.8759	356.87	101.983	138.492	114.846	45.6587	31.8895	88.7912	43.3015	65.3512	57.0667	69.1571	39.1037	80.1972	51.262	43.7048	40.1024	124.257	20.4449	108.845	37.3942	57.1923	41.4449	7.858	308.138	105.032	61.365	5.9282
AC017002.4	0	0	0	2.2243	2.8067	0	0	0	0.9661	0	1.3545	0	0	0	0	2.2479	0	0	0	0.9004	0	0	0	0.9188	0	0	0	0	0	0	0	0	0	1.5961	0	0	0	0	0	0.7863	0	1.5581	0	2.3459	1.7462	0	1.364	0	0
AC017006.2	8.9641	0	1.8747	2.2243	5.6134	4.9688	0	2.0843	0	1.7919	1.3545	2.1844	9.1024	0	1.9933	1.1239	3.9562	1.5328	0	0	1.0457	3.5345	0.9367	3.6751	3.8117	11.6136	0.9132	6.3779	2.4664	0	0	0	2.8815	0.798	2.934	0	0.9933	1.7823	2.713	2.359	5.3973	0.779	1.8752	0.782	0.8731	0	1.364	1.5341	0
AC017006.3	0	0	1.8747	1.1121	1.4033	0	0	1.0421	0	0	1.3545	1.0922	0	1.3195	0	1.1239	0	0.7664	0	0	2.0915	0.8836	0	0	0	0	1.8263	5.1023	0	0	1.8153	1.9022	0.9605	0	0	0	0	0	0.5426	0	1.7991	0	0.9376	0	0.8731	0	0.682	1.5341	0
AC017019.1	0	0	0	0	0	0	0	0	0	0	0	0	0	0	0	0	0	0	0	0	0	0	0	0	0	0	0	0	0	0	0	0	0	0	0	0	0	0	0	0	0	0	0	0	0	0	0	0	0
AC017020.1	0	0	0	0	0	0	0	0	0	0	0	0	0	0	0	0	0	0	0	0	0	0	0	0	0	0	0	0	0	0	0	0	0	0	0	0	0	0	0	0	0	0	0	0	0	0	0	0	0
AC017028.1	1.2806	0	0	0	0	1.2422	0	0	0	1.7919	1.3545	1.0922	0	0	0	0	1.3187	0	0	0	0	0	0.9367	0	1.2706	0	0	0	0	0	0	0	0.9605	0	0	0	0	0	0	0.7863	0	0	0	0	0	0	0	0	0
AC017028.2	0	0	0	0	0	0	0	0	0	0	0	1.0922	0	0	0	0	0	0	0	0	0	0	0	0	0	0	0	0	0	0	0	0	0	0	0	0	0	0	0	0	0	0	0	0	0	0	0	0	0
AC017028.3	0	5.8175	0	0	0	0	0	0	0	0	0	0	1.1378	0	0	0	0	0	0	0	0	0.8836	0.9367	0	1.2706	0	0	1.2756	0	0	1.8153	0	0	0	0	0	0	0	0	0	0	0	0	1.564	0.8731	0	0	0.7671	0
AC017028.4	0	5.8175	0	0	0	0	0	0	0	0	0	0	0	0	0	0	0	0	0	0	0	0	0	1.8375	0	0	0	0	0	0	0	0	0	0	0	0	0	0	0	0	0	0	0	0	0	0	0	0	0
AC017028.5	1.2806	0	0	0	0	1.2422	0	0	0	1.7919	1.3545	1.0922	0	0	0	0	1.3187	0	0	0	0	0	0.9367	0	1.2706	0	0	0	0	0	0	0	0.9605	0	0	0	0	0	0	0.7863	0	0	0	0	0	0	0	0	0
AC017028.6	0	0	0	0	0	1.2422	0	0	0	1.7919	0	0	0	0	0	0	0	0	0	0	0	0	2.81	0	0	0	0	0	0	0	0	0	0	0	0	0.7767	0	0	0	0	0	0	0	0	0	0	0	0	0
AC017028.7	0	0	0	0	0	0	0	0	0	0	0	0	0	0	0	0	0	0	0	0	0	0	0	0	0	0	0	0	0	0	0	0	0	0	0	0	0.9933	0	0	0	0	0	0	0	0	0	0	0	0
AC017028.8	0	0	0	0	0	1.2422	0	0	0	0	0	0	0	1.3195	0	0	0	0	0	0	0	0	0.9367	0	0	0	0	0	0	0	0	0	0	0	0	0	0	0	0	0	0	0	0	0	0	0	0	0	0
AC017028.9	1.2806	0	0	0	0	1.2422	0	0	0	1.7919	1.3545	1.0922	0	0	0	0	1.3187	0	0	0	0	0	0.9367	0	1.2706	0	0	0	0	0	0	0	0.9605	0	0	0	0	0	0	0.7863	0	0	0	0	0	0	0	0	0
[truncated: 53,840 more rows]
[truncated: 27 more columns]

## Sheet: Table.S5C.GSE167573-uniCOX
uniCox analysis of Co-DEGs in GSE167573
id	HR	HR.95L	HR.95H	pvalue
ABCC3	0.965046	0.626397	1.48678	0.871815
ACAA2	1.26145	0.621688	2.55956	0.519997
ACADM	1.04345	0.475447	2.29005	0.915532
ACAT1	1.16898	0.505477	2.70341	0.715111
ACTN1	1.41005	0.582336	3.41424	0.446311
ADA	3.12885	0.796802	12.2863	0.102158
ADAM19	2.69053	1.18979	6.08427	0.0174367
[truncated: 204 more rows]

## Sheet: Table.S5D.TCGA-KIRC-uniCOX
uniCox analysis of Co-DEGs in TCGA-KIRC
[truncated: 212 more rows]
