# Supplementary material
Source: Research Square preprint supplement (doi:10.21203/rs.3.rs-6711579/v1)
Supplement: Supplementary file 4 [file be72d628a753923f6ee9ac6d.xlsx]

## Sheet: Table.S5E
hub-DEGs
ADAM19
AIM2
ALDH18A1
BCAT1
CD79A
CDT1
CXCR4
ELOVL5
ENO2
GAPDH
HTATIP2
ITGA5
ITPKA
LYN
MTHFD2
NAT10
NUSAP1
P4HB
PRR13
PSME4
PTP4A3
RAB31
SERPINE2
SLAMF7
TGFBI
TRIB3
UBE2C

## Sheet: Table.S5F
	os	os_time	ADAM19	AIM2	ALDH18A1	BCAT1	CD79A	CDT1	CXCR4	ELOVL5	ENO2	GAPDH	HTATIP2	ITGA5	ITPKA	LYN	MTHFD2	NAT10	NUSAP1	P4HB	PRR13	PSME4	PTP4A3	RAB31	SERPINE2	SLAMF7	TGFBI	TRIB3	UBE2C	Riskscore	Expression
TCGA.BP.4162	0	8.42192	0	0.691656	0	0.0646887	0	0	2.04667	0.107477	2.62619	0.429098	0.215734	1.51619	0	0.499441	0	0	0	0	0.557861	0	0	0	1.22967	2.29416	0.866069	0	0	0.449744	Low
TCGA.DV.5566	0	3.83014	0	0	0	0	0	0	1.40811	0	1.24758	1.0297	0.803558	1.1249	0	0	0	0	0.0527757	0.585827	0.548531	0	0.294718	0	1.31615	0	2.85084	0.749177	0	0.532572	Low
TCGA.BP.5191	0	2.64932	0.838472	2.36907	0.217525	0	4.48237	0	3.16052	0	2.95162	2.56987	1.23203	1.47499	0.859362	0.212742	0	0	0.379271	1.46723	1.88844	0	0.0623877	0	1.03173	3.95363	4.13414	0.864772	0	1.1067	High
TCGA.BP.5200	0	2.91233	0.86189	0	0	0.762859	0.863748	0	2.6589	0.117891	1.21736	0	0.18958	1.69429	0	0.416124	0	0	0	0	0	0	0.59011	0.248322	0.72594	1.26003	1.26458	0.50107	0	0.603003	Low
TCGA.BP.4347	0	3.74521	0.0766453	0	0.019238	0.306258	0	0	2.01936	0.380761	0.887645	0.00730356	0.00562967	1.09216	0	0	0	0	0	0	0	0	0.64637	0.224603	0.59476	0.777658	2.0233	0.89559	0	0.787848	Low
TCGA.BP.4770	1	0.90137	1.9129	3.83699	0.882242	2.91443	0	0	2.52225	0.689567	1.99407	1.11352	0.476686	2.79497	1.9137	0.189215	0.753583	0	0.722576	1.36029	0.219045	0.278237	0.539582	1.08104	2.09488	0.281196	2.8904	0.684428	1.83748	13.2223	High
TCGA.BP.4762	1	3.67945	0.728473	0.060061	0	0.631041	1.7454	0	1.64167	0.180372	1.1024	0.78633	0	1.16591	0	0.714003	0	0	0	0.0748371	0	0	0.7895	0.890892	1.95242	1.12609	2.79602	0	0	0.874344	High
TCGA.BP.4158	0	9.25205	0	0	0	0	0	0	1.88212	0	2.33126	0.498425	0.254332	1.00481	0	0	0	0	0.00108068	0	0	0	0.766762	0.0562318	0.164781	0.27896	0	0	0	0.771866	Low
TCGA.CJ.4887	1	2.55342	0	1.94065	0.0773229	0	0	0	2.55471	0	1.71304	1.32996	1.10729	1.4059	0	0.304711	0	0	0	0.825087	0.434134	0	0	0	1.05117	2.50711	1.59272	0	0	0.478343	Low
TCGA.B2.4098	1	0.139726	0	0.551182	0.151461	0.651553	2.01066	0	0.953724	0.341734	1.90652	0.639412	1.65331	0	0	0.763584	0	0	0	0	1.22937	0	0.180739	0.542582	3.59101	2.42518	0.5598	0.775523	0	0.84933	High
TCGA.CJ.5676	0	11.1425	0	1.21826	0	0.0352337	1.92875	0	3.28231	0	1.09103	1.24157	0.384419	2.99144	1.77968	0.263588	0	0	0	0.858336	0.957812	0	0.701173	0.0959914	0.408873	1.31825	5.65625	1.20174	0	0.697389	Low
TCGA.A3.3370	0	6.23014	0.638978	1.47335	0	0.362252	0	0	1.9937	0	1.93479	0.224035	0	0.52938	0	0.465317	0	0	0.0322726	0	0.170157	0	0.378477	0.288665	0.766363	2.16509	0.733783	0.123855	0	0.857728	High
TCGA.B0.5102	1	7.5726	0	0.262751	0	0	0	0	2.37665	0	2.19843	0.409943	0.197066	0.874704	0	0	0	0	0	0.573189	0	0	0.242247	0	3.37879	1.18062	0.177523	1.88072	0	0.652299	Low
TCGA.B0.5701	0	6.74247	0	0.394183	0	0.970503	0.22131	0	1.46059	0.210932	2.56944	1.02591	1.01084	1.48947	0	0	0	0.0572065	0.0314952	0.687034	0.444825	0	0.296758	0	1.66218	1.268	4.11674	0.0409262	0	0.84064	High
TCGA.CJ.4905	0	4.09863	1.24465	0	0	0.67848	0	0	2.72237	0.0700079	2.41095	0.318545	0	2.16233	0	0.225186	0	0	0	0	0	0	1.6886	0.692288	0.200248	0	0	0	0	1.21746	High
TCGA.CJ.5682	0	10.2356	0.0266019	0	0	1.02387	0	0	2.16535	0.0894725	0	0.346839	0.470075	1.49413	0	0	0	0	0	0.390415	0	0	0.609349	0.114851	0.87636	0.293928	1.89743	0	0	0.575371	Low
TCGA.AK.3428	0	10.2137	0	0	0	0	0	0	1.27534	0	2.59033	0.635814	0.517424	2.16515	0	0.533759	0	0	0	0	0.0356412	0	0.291317	0.527806	0	1.15166	0.637169	0	0	0.339293	Low
TCGA.BP.4760	0	6.46849	0	0	0.142316	0.573686	0	0	1.11643	0	1.41588	0.731588	0	0.703499	0	0.157036	0	0	0	0	0	0	0.773661	0.41786	1.32636	0	3.11541	0	0	1.01772	High
TCGA.B4.5378	0	0.479452	0.109489	0	0	0	0	0	1.82099	0	1.58574	0.291903	0	1.24801	0	0	0	0	0	0	0	0	0.737029	0.113976	0	0	2.30838	0	0	0.643874	Low
TCGA.B8.4153	0	2.08767	0	0	0	0	0	0	2.64131	0	2.4573	1.31246	0.225553	1.39541	0.148372	0	0	0	0	0.287166	0.088806	0	1.18964	0	0.689792	0	0	0.957131	0	1.30032	High
TCGA.CJ.6028	1	4.45205	1.08772	1.54713	0.443054	1.50983	2.65951	0	2.51933	0	2.43077	0.808791	1.15999	1.77717	0	0.841165	0	0.0121137	0.0696835	0.0967117	0.410808	0.126868	0.134584	0.282249	2.93239	3.87763	4.67232	1.03753	0	1.16566	High
TCGA.DV.A4VX	1	4.45479	0	0	0.23173	0	0	0.214369	1.68978	0.105142	0.0820712	1.60979	2.0809	0	0	0	0	0	0.5397	0.227376	1.98369	0	1.16953	0	0.103758	0	1.25311	2.54834	0	1.5489	High
TCGA.BP.4325	0	8.12055	0	0.0601582	0	0	0	0	0.818818	0	1.65678	0.0485301	0.798599	0	0	0.15373	0	0	0.321259	0	0.16831	0	0	0	1.29351	1.69487	0	0	0	0.49798	Low
TCGA.B0.4691	1	0.380822	0.339106	1.46265	0.37271	0	2.74112	0	2.40581	0.265433	2.74775	1.88428	0.915853	1.74938	1.89533	0	0	0	0.639398	1.1988	1.72622	0	1.38884	0.309468	0.954582	2.44841	4.15202	3.27477	0	3.60785	High
TCGA.B0.4815	1	4.35068	1.46134	3.73531	0.482653	0	4.84868	0	2.48016	0.174046	2.38792	1.19753	1.01716	1.20312	1.41884	0.899302	0.143334	0	0.479454	0.373984	1.2041	0	1.8087	0	0.603214	4.63262	1.18041	2.74249	1.01685	5.08404	High
TCGA.BP.5004	0	3.08493	0.499245	0	0.342548	1.22665	0	0	1.85063	0.462123	1.06878	0.315239	0	1.79544	0	0	0.221304	0	0	0	0	0	0.425895	0.327647	1.58804	0	0.824177	0	0	0.834976	High
TCGA.B0.5402	0	3.53425	0	0	0	0.375181	0	0	1.45972	0	2.71773	0.513496	1.58068	1.38171	0	0	0	0	0	0.692867	0.49974	0	0	0.228199	0.855079	0.395592	4.0346	0	0	0.372825	Low
TCGA.CZ.5453	1	6.6274	0	0	0	0	0	0	0.889186	0	2.0824	0.751035	0.262499	0.913667	0	0	0	0.204438	0	0.175266	0.64621	0	0	0	0.146513	0	0	1.81432	0	0.774726	Low
TCGA.B0.4701	1	0.652055	0.265353	0.77487	0.306355	0	0.718296	0	2.36508	0.137355	2.07249	1.03602	0.860532	1.27289	0	0	0	0	0	0.538384	0.197565	0	0.50567	0	1.70755	1.21784	0.935371	1.91806	0	0.906038	High
TCGA.BP.5189	1	2.25205	0.406932	0.0912665	0.100868	0.37732	0	0	2.25137	0.128402	2.46264	0.568627	0.574009	1.99822	0	0.713419	0.188055	0	0	0.799421	0.179196	0	0.965472	0.70687	3.02412	0.692419	5.44795	1.33755	0	0.658505	Low
TCGA.DV.5574	0	5.52329	0.691743	1.1472	0	1.85794	2.20275	0	2.53372	0.193219	1.00931	0.178627	0.255985	2.24687	0	1.27087	0.0442668	0	0	0	0.102024	0	0.592442	1.16785	0.817571	2.31719	5.30497	0	0	0.741895	Low
TCGA.B0.5117	0	4.40548	0	0	0	0.889623	0	0	0	0	0	0.614423	1.36785	0	1.59533	0	0	0	0	0	0.553876	0	0.842359	0	0	0	0	0.287866	0	1.21339	High
TCGA.CZ.4857	1	3.92329	0.695629	0.264695	0.650486	0.345823	0	0.0831026	2.16253	0	3.12673	1.93163	1.22484	1.17737	1.20106	0.448984	0	0	0	0.738172	1.01389	0	1.11395	0.281957	2.47928	0.979625	2.86172	2.78643	0.169019	2.31028	High
TCGA.CJ.4918	1	0.254795	1.14991	0.843017	0	2.44277	1.06186	0	2.0423	0.0532683	0.380104	0.100258	0	2.4992	0	0.736752	0	0	0	0.17721	0	0	1.63088	1.20809	3.28929	1.53732	4.67173	0.431169	0	1.26463	High
TCGA.B8.4622	0	4.17808	0.695532	0.554293	0	0.296246	0	0	2.78273	0	2.62735	1.10545	0	1.82235	0	0.345835	0	0	0.0724043	0.449427	0.517332	0	1.0982	0.506031	0.292074	1.03172	3.76459	1.34523	0	1.14087	High
TCGA.B0.4693	1	0.210959	0	0.22824	0	0	1.26454	0	1.4881	0	2.63639	1.12237	0.504298	1.42951	0	0.269226	0	0	0	0	0.83185	0	0.0540312	0	1.27544	2.05584	0.100154	2.15965	0	0.531378	Low
TCGA.DV.5569	0	0.972603	0.179064	0	0.147083	0.137889	0	0	2.19227	0	1.56145	1.04536	0.240623	2.05487	0	0.250658	0	0	0	0.436789	0.374943	0	0.0321683	0.220228	1.02406	0.939873	2.24549	0.254422	0	0.362393	Low
TCGA.CZ.4866	0	8.95068	0	0	1.04336	0.475017	0	0	0.967331	0.464945	2.26752	0.657983	1.09475	0	0	0.100163	0	0	0	0.195099	1.04023	0	0.57981	0	0.12086	0.319879	0	0.565819	0	1.58576	High
TCGA.B0.5095	1	0.671233	2.32792	0	0.243989	1.61929	0.816139	0	2.06718	0.0869421	1.92721	1.15105	0.149037	2.56003	0.466354	0.493996	0	0	0	0.563661	0.163839	0	1.98992	1.04964	2.07224	0.128214	5.6648	1.38626	0	2.42892	High
TCGA.AK.3460	0	6.87123	0	0	0	0	0	0	2.11918	0	2.08881	0.548694	0.283986	1.00578	0	0	0	0	0	0	0	0	0	0.0681889	0.632948	0	1.10265	0.788648	0	0.597064	Low
TCGA.B2.3924	0	2.99178	0	2.3682	0	0.015597	1.11851	0	2.17458	0	1.29461	0.35034	0.608038	0	0	1.01577	0	0	0.0970857	0	0.348896	0	0	0.0465107	0	3.62483	0.271804	0.761232	0	0.713832	Low
TCGA.B8.A54J	0	1.44658	0	0	0	0	0	0	1.98709	0.0280616	0.393028	0	0	1.58216	0	0	0	0	0	0	0	0	1.37601	0	0.768209	0.475485	0	0	0	0.586404	Low
TCGA.BP.4165	0	8.32055	0.114542	0	0	0	0	0	2.17274	0	0.619153	0.605089	0	1.48733	0	0	0	0	0	0	0	0	0.8135	0	0.249805	0.944732	0	0	0	0.516602	Low
TCGA.CW.6090	0	6.99178	1.164	0.235531	0.520792	1.27351	1.00415	0	4.1623	0	2.88389	0.998978	0.916825	2.70072	0	0.582174	0	0	0	0.416372	0.570399	0	0.506059	0.721938	1.24454	1.37374	4.53896	2.23879	0	0.899347	High
TCGA.CJ.5672	1	5.40274	0	1.55092	0	0.5314	0.467811	0	2.24903	0.0901538	0.578728	0.610534	1.14968	1.05572	0	0.851179	0	0	0	0.381276	0.746708	0	0	0.273208	2.55459	2.61286	2.66723	0	0	0.451042	Low
TCGA.A3.3328	0	3.79452	0	0	0	0.303925	0	0	0.119796	0	0	0	0.574689	0	0.803579	0	0	0	0	0	0.69782	0	0	0	0	0	0	0	0	0.490915	Low
TCGA.BP.5180	0	6.2	0	1.62082	0	0	0.00104224	0	3.38553	0	2.72744	1.66346	0.703707	0.294241	0	0.189993	0	0.0361179	1.03177	1.41113	0.843707	0	0	0	1.49397	2.19706	4.22122	1.03442	0	1.82113	High
TCGA.A3.A8OV	0	0.931507	0	0.315926	0.189115	0	0	0	0.860806	0	2.78653	1.08892	0.492826	0	0	0	0	0	0	0.408206	0.622787	0	0.0450917	0	0	0.77134	0	1.87781	0	0.914912	High
TCGA.B8.4619	0	1.43288	0	0	0	0	0	0	0	0	0	0	0.269499	0	0.549737	0	0	0	0	0	0.300493	0.316031	0	0	0	0	0	0	0	0.904882	High
TCGA.B0.4843	1	0.876712	2.01804	0	0	0.301106	0	0	3.07664	0	3.2621	1.22582	0	2.96851	0	0.0720665	0	0.091998	0	0.244098	0.00667753	0	2.55321	0.582147	0.968088	0	1.85622	2.9517	0	2.80572	High
TCGA.AK.3450	0	4.13151	0	0	0	0	0	0	1.04654	0	0.782891	0.674416	0.775751	0.706317	0	0	0	0	0	0.681103	0.765467	0	0	0	1.99771	0	0	0	0	0.371844	Low
TCGA.CW.5585	0	7.14795	0	0	0	0	0	0	1.28914	0	1.67942	0.263706	0	1.06913	0	0	0	0	0.197075	0.175655	0.00395612	0	0.266344	0	1.72592	0	0	0	0	0.578964	Low
TCGA.B8.5552	0	2.86575	0.850716	0.014954	0	0.796689	1.73705	0	1.78406	0	1.40879	0.0238331	0	1.90737	0	0.5533	0	0	0	0	0	0	0.65463	0.643002	0.136699	1.23408	1.42204	0	0	0.479864	Low
TCGA.BP.5000	0	1.54247	0.455324	0.615927	0	0	0.124924	0	2.79118	0.00976485	1.94781	1.2548	0.171107	1.80234	0	0	0	0	0	1.63522	0.978029	0	1.19984	0.358269	3.93742	1.76358	4.47015	0.391308	0	0.643144	Low
TCGA.B0.4713	1	0.553425	0	0	0.431573	0	0.734911	0	1.60794	0.492585	0.859173	2.04034	1.07307	1.21604	0	0	0	0	0.492475	0.64134	2.13317	0	0.263624	0	0.691153	1.41272	2.45768	2.03764	0	1.0103	High
TCGA.CZ.5454	1	1.97808	0	0.397488	0	1.35089	0	0	3.47631	0	2.1753	0.744229	0.935784	1.79087	0	0.705934	0	0.287335	0	0.305833	0.592462	0	1.14407	0.506614	1.38388	2.02707	2.07618	1.06475	0	1.48938	High
TCGA.AK.3465	0	1.01096	0	0	0	0.451492	0	0	0	0	0	0.235897	0	0	0	0	0	0	0	0	0	0	0.274604	0	0	0	0	0	0	0.598977	Low
TCGA.BP.4758	0	6.04932	0.184797	1.1052	0	0	1.08139	0	2.38783	0	1.28246	0.669943	0	1.84198	0	0.0342484	0	0	0	0.66652	0.775769	0	1.21461	0.112031	0.15487	2.47465	0	0	0	0.530792	Low
TCGA.CZ.4864	1	3.60274	0.0361247	0.670269	0	0	0	0	2.4858	0	1.51082	0	0	0.415405	0	0.899302	0	0	0.107677	0	0.515582	0	0	0.279041	0.196264	2.32662	0.359476	0	0	0.46651	Low
TCGA.A3.3316	0	4.09041	0.508574	0.0950578	0	0.889914	0	0	1.62806	0.355359	2.04917	0.640676	0.210386	1.83537	1.21748	0.375584	0	0	0	0.104392	0	0	0.929714	0.96662	2.37307	0.742182	7.01477	1.17209	0	1.59143	High
TCGA.B0.5119	0	4.25205	0	0	0	0.136528	0	0	1.03323	0	2.02915	0.305905	0.237026	0.681151	0	0	0	0	0	0	0.0966786	0	0	0	1.41429	0.344274	0	0	0	0.52807	Low
TCGA.BP.4983	0	3.87123	2.19752	2.95089	1.26733	3.45969	3.19167	0.156946	2.09576	0.0170641	3.08903	1.49739	2.69916	2.44673	6.09538	0.95705	1.87093	0.0305785	1.22796	2.09702	0.773145	0	0.689222	0	1.07012	3.82446	4.07776	2.76193	2.85235	5.00934	High
TCGA.B0.4848	1	2.41918	0	0.769718	0.521863	0	0.728304	0	1.60502	0.168012	2.42057	1.20239	0.756598	1.39356	1.32205	0.520634	0	0	0.029649	1.71767	0.805705	0	0.393441	0.170358	1.0398	1.0842	4.51389	2.28954	0	0.993764	High
TCGA.B0.5080	1	0.936986	2.18207	0	0.227351	0.592351	4.2486	0	3.38737	0	1.64006	0.574072	0.409115	2.97259	0.427773	0.52919	0	0	0	0.159808	0	0	2.57691	0.847535	1.55801	2.08889	3.93556	1.69085	0	1.35897	High
TCGA.AK.3447	0	3.33425	0	0	0	0	0	0	0	0	0	1.44644	3.39354	0	0.489873	0	0	0	0	0	1.47333	0	0	0	0	0	0	0	0	0.390993	Low
TCGA.BP.5183	0	3.53699	0	0.945188	0.191839	0	0	0	1.50326	0	2.6773	1.12353	0.680568	0.577768	0	0.33903	0	0	0.178515	1.09439	0.734948	0	0	0	0	2.09832	1.61614	0	0	0.578062	Low
TCGA.B4.5377	0	1	0	0	0	0	0	0	1.54787	0	1.77232	0.529345	0.421851	0	0	0	0	0	0	0.130156	0	0	0	0	1.95213	1.19743	0.489138	0	0	0.573199	Low
TCGA.AK.3453	0	6.93425	0	0	0	0	0	0	0	0	0	0.182905	0.294486	0	0	0	0	0	0	0	2.03355	0	0	0	0	0	0	1.0105	0	0.393944	Low
TCGA.CZ.4858	1	5.76712	1.12668	4.0146	1.1967	4.01467	0.918451	0.978841	2.62537	0	2.17481	1.52666	1.17651	1.70984	0	0.165591	1.47087	0.29268	1.52822	1.47938	0	0	0.601673	0	0.516732	2.87868	4.08272	3.04844	2.24046	5.38665	High
TCGA.B0.5081	1	0.991781	1.70534	1.82254	0	0.334061	3.84596	0	3.19833	0.356333	0.772494	0.475089	0.616496	2.06245	0.524373	0.903191	0	0	0.52561	0.654465	1.01584	0	1.42401	0.805637	0.735948	3.5947	5.27096	1.00895	0	1.29648	High
TCGA.B0.4836	1	3.39178	0.398089	1.36457	0	0	2.1118	0	3.09219	0	2.66146	1.11235	0.777988	1.46644	3.26396	0	0	0	0.465558	1.4086	0.377276	0	0.267025	0.097644	5.76471	1.90636	7.13578	1.6996	0	2.08549	High
TCGA.B0.5100	1	5.2411	1.57299	0	0	1.69939	0	0	1.73283	0	2.24167	0.908454	0	1.85442	0.978022	0	0	0	0	0	0	0	1.26407	0.353019	0.024467	0	3.86159	2.0601	0	2.61974	High
TCGA.A3.3374	0	3.6	0.235715	0	0	2.19789	0	0	0.981035	0	0	0.416652	1.27471	0.364685	0	0.514315	0	0	0	0	0.412752	0	1.14397	0.811664	0	2.69945	1.64929	0	0	0.83035	High
TCGA.B0.5085	1	2.10959	0	0	0	0	0	0	0.982396	0	2.12088	1.46093	0.438768	0.757717	0	0	0	0	0	0.38429	0.200287	0	0.247494	0	0.20054	0.34408	0	0	0	0.679159	Low
TCGA.CJ.4892	0	4.16712	0	0	0	0	0	0	2.28674	0	2.07745	0.780885	0.192011	0.743239	0	0	0	0	0	0.0711428	0.430246	0	0.510335	0	1.06672	1.4963	0	0	0	0.649306	Low
TCGA.B0.4849	1	0.189041	0	0	0	0	0	0	2.25866	0.240226	2.18405	0.443877	0	1.40202	0	0	0	0	0	0	0	0	0.407725	0	0	0	0.542693	0	0	0.744474	Low
TCGA.CJ.5680	1	2.10411	0	0	0.17491	0	0	0	1.72195	0	1.56582	0.84817	0.454519	0.574367	0.565772	0	0	0	0	0.192863	0.629007	0	0.221841	0	0.467855	0	0	0.578555	0	0.766617	Low
TCGA.BP.5187	0	1.11233	0	0	0.273177	0.98732	0	0	2.79663	0.0347769	1.63968	0.74841	0.786154	1.29582	0	0.053595	0.116987	0	0.372663	0	0.5115	0	0.129434	0.266501	1.02872	0	4.60719	0	0	0.860757	High
TCGA.B0.5712	0	7.45753	0	0	0.232994	0	0	0	1.08289	0	0.294785	0.905537	1.07394	0	0	0	0	0.0137658	0.0345075	0.339665	1.10943	0	0	0	1.18458	0	0.65068	0	0	0.501751	Low
TCGA.B0.5693	0	11.1616	0	0	0	0	0	0	1.25716	0	1.35437	0.428418	0	1.73675	0	0	0	0	0	0	0	0	0.561445	0	0	0	0	0.397044	0	0.493569	Low
TCGA.BP.4782	0	0.969863	0	0.220074	0.0220595	0.590893	0	0	1.34202	0	1.6492	1.41513	0.797627	1.56088	0	0.316766	0	0	0	0.695395	0.700833	0	0.270037	0.668471	1.94144	1.62897	2.47498	0	0	0.433436	Low
TCGA.B0.4816	1	3.75616	0	0.0841699	0	0.568048	0	0	3.12262	0	1.79768	0.749188	0.0422836	1.81565	0	0.476789	0	0	0	0.351818	0.0749073	0	0.892012	0.539763	0.961481	0.0439477	2.23694	0	0	0.824151	Low
TCGA.BP.4353	1	1.0274	1.14505	1.35572	0	1.56971	0	0	2.60282	0.12373	1.94684	0.55307	0.750959	2.45946	0.0705285	0.992438	0.020448	0	0.223214	0	0.267836	0.324289	0	1.1313	0.730993	1.20725	5.46418	0	0	1.60828	High
TCGA.CZ.5465	1	7.02466	0	0	0	0	0	0	2.58173	0	3.26598	1.19967	0.503909	1.02065	0	0	0.901065	0	0	0.492399	0.738058	0	0.14741	0	1.23103	0	1.07815	2.32172	0	0.43042	Low
TCGA.B0.5088	1	1.54247	0.774922	0	0	0	1.63881	0	2.5168	0	1.92129	0.642232	0.575273	1.61053	0	0	0	0	0	0.03906	0.607041	0	0.803881	0	0.287313	1.27013	1.74143	0	0	0.554187	Low
TCGA.DV.5565	0	3.6411	0.945555	0	0	0.958157	0	0	3.27045	0.26952	1.02184	0.724102	0	3.08433	0	0	0	0.374703	0	0.489871	0	0	1.08499	0.65107	1.80754	0.99294	3.48631	0	0	1.06751	High
TCGA.CZ.5451	0	5.28493	0	0	0	0	0	0	1.42405	0	1.34291	0.787303	0	1.04027	0	0	0	0	0	0.311763	0.0757821	0	0.123895	0	0	0.592505	0	0	0	0.457614	Low
TCGA.BP.4771	1	0.443836	1.52392	2.39561	0	0.0494265	0.5127	0	2.52915	0.486648	1.41958	0.140901	0.402406	1.43447	0	0.96823	0	0	0.333989	0	0.474664	0	1.6267	0.431761	0	2.84972	2.32899	0.157979	0	1.94889	High
TCGA.CW.5588	0	5.52603	0	0	0.153699	0.946394	0	0	1.2353	0.143681	2.86825	1.55068	0.541633	2.41282	0	0.88365	0	0	0	0.503968	0.827282	0	1.18138	0.724271	0.76199	0.951244	7.045	1.90668	0	1.16495	High
TCGA.BP.5169	0	0.528767	0.831767	2.74276	0.572845	0	6.60178	0	2.3297	0	2.00933	1.75438	1.28055	3.12358	5.15747	0	0	0.132134	0	2.31577	0.532202	0	2.33564	0	3.92935	4.50812	5.27397	3.21964	0.25113	4.42066	High
TCGA.BP.4342	1	6.18082	2.00852	0.187216	0	0.801063	0	0	2.99063	0	1.48274	0.259136	0.252679	1.87171	2.26638	0	0	0.111629	0.420665	0.00600512	0	0	1.3695	0.110282	3.62871	0.472083	1.11849	1.67306	0	3.33703	High
TCGA.A3.3372	0	2.0137	0.0169819	0.408571	0	0	0	0	2.49221	0	1.89631	0	0	1.10615	0	0.117371	0	0.0528333	0	0	0	0	0.668428	0.325994	0.271766	1.09062	4.50096	0	0	0.65441	Low
TCGA.BP.4177	0	4.57534	0	0	0	0	0	0	2.65054	0	2.0101	0.414124	0	0.834963	0	0	0	0	0	0.196849	0.27289	0	0.633933	0	0	0	2.27242	0.173146	0	0.799016	Low
TCGA.B0.4814	1	0.460274	0	0	0	0	1.19012	0	2.49649	0	2.01205	0.678888	0.372169	0.774818	0	0	0	0	0.205237	0.178377	0.387967	0	0.642289	0	0	0.714093	1.89306	2.97319	0	1.08894	High
TCGA.CW.5580	1	5.38082	0	0	0.776872	0.69209	0	0	1.18961	0	1.74151	0.83271	0.143884	2.05555	0	0.262227	0	0	0.431549	1.32033	0.119228	0	0	0.0111256	0.879177	0	2.59181	0.179951	0	0.549221	Low
TCGA.CZ.4860	1	0.564384	0.373408	2.2459	0.946554	1.40727	0	1.36234	1.67014	0.734433	2.87282	1.43088	2.67573	1.80409	2.91954	0.381903	1.85674	0.916594	0.286764	0.796893	0.817368	0.14319	0	0.0371783	2.81967	0.00633401	3.65077	4.50004	0.910158	4.74452	High
TCGA.BP.4985	1	2.60822	0.568529	2.96479	0.497052	0.174926	0	0	1.68521	0.0257258	4.14492	2.40807	1.92505	2.90088	2.43372	0.114648	0	0	0.100098	1.36651	2.12656	0	1.62894	0.730201	1.15193	0.764245	1.68846	3.21566	0	3.80957	High
TCGA.CW.5589	0	6.51507	0.214726	0	0	0	0.0524412	0	1.71174	0	1.89981	0.837961	0.0325611	1.76104	0	0.332905	0	0	0	0.0483932	0.36328	0	0.917568	0	0.320739	0.746362	2.31596	0	0	0.645143	Low
TCGA.BP.4989	0	0.323288	1.32112	2.10096	0	0.620348	2.60947	0	2.69924	0	1.03933	0.0793528	0.175093	0.517817	0	0.739766	0	0	0.0143931	0	0.210784	0	0	0.296053	0.277596	3.22692	1.70362	0	0	0.688898	Low
TCGA.B0.4714	1	0.271233	0.173331	1.75546	0	0	0	0	2.08186	0	1.82372	0.664498	0.338335	0.828162	0	0.180952	0	0	0	0	0	0	1.45005	0	0.617206	2.91114	0	0.0376207	0	1.17241	High
TCGA.DV.5573	0	3.09589	0	2.01667	0	0.243654	0	0	1.95045	0	1.47798	0.318739	0.222345	0.257124	0	0.292948	0	0	0.314555	0	0.749624	0	0	0	0.697858	2.51829	0.606649	0	0	0.826133	High
TCGA.CZ.5469	1	2.59178	0	0	0.378547	0	0	1.03413	2.26118	0	3.01401	2.61304	0	1.59693	1.98591	0	0	0	0.091547	1.5208	0.827768	0	1.41118	0	2.14327	0	2.339	3.09267	1.2283	2.59548	High
TCGA.CJ.6027	1	9.90411	0.322879	3.15776	0.643676	0.410177	0.544764	0	3.65437	0	2.37577	1.39656	1.27685	0.948452	2.27726	0.509357	0.666863	0.385976	0.347107	1.53742	0.753803	0	0	0	2.40621	3.56768	4.66775	2.83893	0.19409	2.2641	High
TCGA.BP.5007	0	3.12329	0	0.68349	0	0.0589532	0	0	2.49785	0	2.76913	0.708836	0.281847	1.43	0	0	0	0	0	0.187321	0.298452	0	0.436486	0	0.0336982	0.348842	3.36696	0	0	0.778812	Low
TCGA.BP.4967	0	0.561644	0	0	0.0888037	0.181925	0.596649	0	1.91303	0	1.90506	0.480437	0.478047	1.39055	0	0	0	0	0	0.201904	0	0	0.218343	0.0744104	1.47619	0.594157	5.52134	2.02587	0	0.599936	Low
TCGA.CJ.5683	0	5.17534	0	0	0.26014	0.296051	0	0	1.50209	0	2.38325	1.5146	0.109661	1.18757	0	0	0	0	0	0.555009	0.191928	0	0.695052	0	1.21889	0	0	0	0	1.01867	High
TCGA.CZ.5986	0	1.02192	0	0	0	0	0	0	2.05503	0	2.72812	0.579322	0	0.512279	0	0	0	0.136313	0.229141	0	0	0	0	0	1.09937	0.925391	0.03231	1.23722	0	1.01465	High
TCGA.CJ.4639	0	8.84658	0.19811	0.212005	0	0	0	0	2.48385	0	2.02585	0.143818	0	1.33206	0	0.109496	0	0	0	0	0	0	0.698744	0	1.33316	1.68204	0	0.694442	0	0.590202	Low
TCGA.BP.5176	1	4.35616	0	0	0.532565	0	0	0	1.37312	0	0.889977	1.5426	0.172274	1.08633	0	0	0	0	0	1.56211	0.320029	0	0.288013	0	1.87265	0.417946	1.1528	0	0	0.483329	Low
TCGA.B4.5834	0	0.10411	0.765302	0	0	0.383444	0	0	2.59194	0	1.9587	0.138762	0	2.19352	0	0	0	0	0	0	0	0	0.563389	0.335716	0.314326	0	0	0	0	0.521299	Low
TCGA.CZ.5467	1	0.2	0	0	0	1.11729	0	0	1.57898	0	2.5913	0.241634	0.0630898	2.4891	0	0	0	0	0	0	0.187263	0	1.07741	0.31812	0.153412	0	2.55147	0.847078	0	0.852677	High
TCGA.CJ.4889	0	5.33151	1.11978	2.24969	0	0.614418	5.08663	0	2.03929	0.171224	1.39072	0	0.0739791	0.712341	0	0.765334	0	0	0	0	0	0	0.0200222	0.342423	1.35862	3.6915	1.49698	0	0	0.739541	Low
TCGA.B0.5692	0	10.8055	0	1.28689	0	0	0	0	1.56712	0	1.33844	0.631342	0.971369	0.450385	0	0.188826	0	0	0.28482	0.272778	0.877822	0	0	0	1.25999	2.4972	0.042127	0	0	0.514723	Low
TCGA.AK.3425	0	9.1589	0.11017	1.24849	0.157202	0.0801453	0.433804	0	2.13366	0.0723436	2.27461	1.54698	1.1982	1.9817	1.53682	0.971535	0	0	0.0957253	0.932029	0.994163	0	0.83546	0.675568	0.112989	2.66738	3.67721	1.17277	0	0.899068	High
TCGA.CZ.4853	0	2.12055	0	0	0	0	0	0	1.09329	0	2.63017	1.21056	1.23534	0.122064	0	0	0	0	0.24051	0.712895	0.387287	0	0	0	1.23871	0.799818	0	1.17559	0	0.755074	Low
TCGA.BP.5195	0	2.05205	0.0530326	0	0	0.34699	0	0	1.94472	0.130056	1.88349	0.25019	0.165857	1.81001	0	0.387153	0	0	0	0.436011	0.366682	0	1.04816	0.62074	0.290034	0.306855	4.69351	1.31004	0	0.731199	Low
TCGA.B0.5691	0	9.4	0.3462	0	0	0.196507	1.38697	0	1.48178	0	1.52938	0	0	1.12889	0	0.217798	0	0	0	0	0	0	0.161694	0.204383	0.335023	0.680853	0.438303	0	0	0.432025	Low
TCGA.BP.4971	0	4.07397	2.30577	1.52283	0	1.13207	0.453042	0	2.05484	0	2.13167	0	0	1.33099	0	0.0561227	0	0	0	0	0	0	2.01868	0.872324	0	2.91309	2.24258	0.46539	0	1.71733	High
TCGA.BP.4959	0	7.28767	0	0	0.572358	0.781913	0.244046	0	2.33602	0	0.446863	0.795276	0.708763	0.855271	0	0.698448	0	0	0	0.713867	1.14637	0	0	0.497379	0	0.559459	1.07368	1.39773	0	0.516485	Low
TCGA.CJ.4884	0	4.81918	0.194903	0.612718	0.30723	0.353211	1.35627	0	1.96688	0.368498	1.51568	0.453601	0.903311	1.66106	0	0.393278	0	0	0.10175	0.583883	1.26766	0	0.312694	0.114267	0	2.03611	1.28897	0	0	0.483488	Low
TCGA.CJ.4888	1	4.29315	1.0884	3.78187	0.30256	0.63318	3.30263	0	3.1163	1.0373	2.36343	0.717004	1.12392	1.79126	3.82956	1.13603	1.49216	0	0	0.531773	0.803178	0.14183	1.42372	0.608881	0.572216	4.04344	1.17914	2.47144	0	3.77113	High
TCGA.EU.5907	0	0.347945	0	0.226198	0	0	0	0	1.65022	0	2.99292	1.13783	1.16164	0	0	0	0	0.393362	0	1.17732	0.417708	0	0	0	0.710393	0	3.66545	1.7905	0	1.46771	High
TCGA.AK.3458	0	3.2	0	0	0	0	0	0	2.13172	0	2.04489	1.1914	1.14005	0	0	0	1.37997	0	0	0.282889	0.413724	0	0	0	0.736726	0.252815	0	1.53268	0	0.255458	Low
TCGA.EU.5904	0	1.50959	0.0101798	0	0	0	0	0	2.13493	0	1.39091	0.211589	0	2.07974	0	0	0	0	0	0	0	0	0.458641	0.0557458	0.676966	0	0.354033	0	0	0.411188	Low
TCGA.A3.3357	0	7.36438	0	0	0.702247	0.217213	0	0	1.60745	0	1.95481	0.976323	1.19936	0.744503	0	0.567883	0	0	0.5981	0.685867	1.0796	0	0	0	0.0938466	0.885931	1.86098	2.02432	0	0.827957	High
TCGA.CJ.4899	0	4.1863	0.640727	0	0	0.939298	0.444881	0	1.78357	0.0571612	1.83684	0.0124569	0	1.60704	0	0.313364	0	0	0	0	0	0	0.464665	0.723299	0	0.806621	1.53411	0	0	0.57386	Low
TCGA.A3.3322	0	4.04932	0.0714952	0	0	0	0	0	1.55205	0	2.29307	0.408485	0.175677	0.343697	0	0	0	0	0	0	0	0	0.127588	0	1.05496	0.156789	1.43924	0.616957	0	0.754382	Low
TCGA.CZ.5466	0	1.87671	0.320449	0.840489	0.113808	0	2.24346	0	1.5748	0	1.93761	1.94048	1.32225	0.655208	0	0.388514	0.106974	0	0	1.35115	1.09592	0	0.75413	0	0	2.68011	2.0372	1.28262	0	0.667758	Low
TCGA.B0.4712	1	3.66301	0.342993	2.01201	1.25225	0.981099	1.75434	0.610305	2.09955	0	2.43767	2.16781	2.35343	2.9037	2.94481	1.00022	0.734819	0	0	1.50971	1.77395	0	0.40306	0.826149	2.03201	2.29678	6.09315	3.45346	1.95234	0.768602	Low
TCGA.BP.4756	0	1.02466	0	0	0	0	0	0	0	0	1.27129	0	0.110147	0	0	0	0	0	0	0	0.493908	0.150768	0	0	1.44179	0.689018	0	0	0	0.622371	Low
TCGA.B0.4845	1	5.4411	0	0	0	0	0	0	1.61085	0	2.24429	0.522733	0.400948	1.43534	0.363632	0	0	0.0116278	0.581678	0.0541292	0.229639	0	0.284029	0.0603147	0.671622	0	0	1.38276	0	0.90909	High
TCGA.CZ.5982	0	6.68219	0	0	0	0	0	0	1.52046	0.621733	1.81508	0.129622	0	1.51589	0	0	0	0.132037	0	0	0	0	0	0	1.48785	0	2.13342	0.796523	0	0.87254	High
TCGA.BP.5181	0	4.09589	0	0	0	0	0	0	1.13509	0	1.5115	0.800721	1.02893	1.41309	0	0	0	0	0.165008	0.273653	0.189012	0	0.191427	0	2.12684	0	0	0	0	0.461177	Low
TCGA.AK.3445	0	6.55342	0.486807	1.13942	0.55144	0	0	0	2.48541	0	3.15977	1.61767	0.890088	1.87803	1.61787	0.666852	0	0	0.359545	0.983264	0.121366	0	1.12774	0.0575928	2.17611	1.52556	6.35723	2.93732	0	2.72533	High
TCGA.B0.4838	1	2.28493	0	0.695253	0	0	0.509882	0	1.98097	0.457549	0.534028	0.497064	0.272416	0.691839	0	0.41486	0	0	0	0	0.632214	0	0	0.0629395	0	2.32643	0.219221	0	0	0.534676	Low
TCGA.CZ.5459	0	4.61096	0	0	0.326592	0	0	1.44201	1.92819	0	2.07958	1.08133	1.06237	1.31758	1.3927	0	0	0	0.256835	0.163794	0.485744	0	0.454268	0	0.8887	0.331639	3.46571	3.73744	0	0.818334	Low
TCGA.B8.5165	0	2.01918	0	0	0	0.887095	0	0	1.20905	0	1.69468	0.173863	0	1.76444	0	0.471053	0	0	0	0	0.00133189	0	0	0.182121	0.230857	0.714871	1.36829	0	0	0.424134	Low
TCGA.B8.5158	0	3.33699	0	1.22419	0.288063	0.76772	0	0	2.31794	0	2.00631	1.17886	0.463366	1.65552	1.33439	0.758432	0	0.136216	1.10922	1.86253	0.849344	0	0.392761	0	4.59828	1.79498	6.70384	2.10978	0	2.51476	High
TCGA.A3.3362	0	4.27123	0	0	0	0	0	0	1.36116	0	1.44338	0.811416	0	0.975075	0	0	0	0	0	0.0248659	0.291163	0	0	0	0.734005	0	0.708026	0	0	0.526664	Low
TCGA.CJ.4638	1	1.18082	0	0	0.10583	0	0	0	0.542397	0	2.22933	1.72492	0.997522	0.0170292	1.86695	0	0	0	0.295315	0.502315	1.36476	0	0.618775	0	1.34647	0	0.153807	1.77942	0	2.19096	High
TCGA.BP.4799	1	3.10411	0.420925	0.144345	0.41406	1.5178	1.61229	0	3.13914	1.05891	1.24155	0.274207	2.14021	2.60142	1.74829	0.0595253	0.458132	0	0	0.745852	0.237803	0	2.17911	1.29588	4.33096	1.25964	6.41681	2.21361	0	2.40375	High
TCGA.B0.4841	1	0.558904	0	0	0	0.305772	0	0	2.6554	0.428644	1.29675	0.888813	0.0465615	2.13785	0	0	0	0	0	0.00969949	0	0	1.64206	0.65039	0.281677	0	0	0.856411	0	1.39623	High
TCGA.BP.4795	0	1.69863	0.471551	0	0	0.126029	1.67234	0	1.71233	0	1.29597	0.0436685	0	1.72286	0	0.745307	0	0	0	0	0	0	1.02397	0.895461	0.502545	0.729353	3.17791	0	0	0.504291	Low
TCGA.CJ.4923	1	1.56712	1.32015	1.63122	0	0	2.33149	0	2.66687	0	2.43514	1.67504	0.718097	1.67311	1.22584	0.186979	0	0.0232897	0	0.783963	1.06764	0	2.37072	0.0883117	0.390411	2.31758	3.99767	1.9899	0.235583	3.16774	High
TCGA.CJ.4641	1	4.55068	1.03252	2.33456	0.276583	0	1.44915	0	2.22435	0.139886	1.27751	0.54218	0.693499	1.16008	0	0.662866	0	0	0.743079	0.19121	0.854593	0	0.163637	0.375864	0.933399	3.26181	2.7827	0.354559	0	0.906021	High
TCGA.CJ.4893	0	2.05479	0	0.836795	0	0	0	0	2.89674	0.476137	0.890171	0	0.234595	1.10615	0	0.503038	0	0	0	0.317305	0.609665	0	0.341553	0.0384421	1.95864	2.27307	0.0833386	0	0	0.564802	Low
TCGA.BP.4976	0	4.47123	0	0	0	0.0436911	0	0	1.40305	0	2.1512	0.905732	0	0.779968	0	0.110468	0	0	0.153639	0.141336	0.405851	0	0	0	0.660836	0	0	0	0	0.69276	Low
TCGA.BP.4341	1	4.35342	0	0	0	0	0	0	0.615001	0	2.06773	0.999367	0	1.24092	0	0	0	0	0	0.0271019	0	0	0.170925	0	1.05778	0	0	0	0	0.58909	Low
TCGA.DV.A4W0	0	6.76712	0	0	0	0.134	0	0	2.04493	0	1.31492	0.559973	0.708277	2.11579	0	0	0	0	0.298813	0.438733	0.125837	0	0.245939	0	0.865962	0	0	0.426794	0	0.423294	Low
TCGA.BP.4166	0	0.0356164	1.54549	0	0	0.762762	0.181376	0	2.93309	0.148256	1.03428	0.00963714	0.385878	2.02183	0	0.502552	0	0	0	0.145711	0	0	1.71192	1.01814	0.856342	1.27917	2.87679	2.7594	0	1.0564	High
TCGA.B0.4813	1	0.0493151	0.278082	0	0	0	0	0	4.17902	0	2.6051	0.89912	1.47869	2.12045	2.28494	0	0	0	0.344483	0.119072	0	0.231602	0.960613	0	0	0	1.61089	3.89503	0.0295759	3.70477	High
TCGA.B0.5098	1	4.33973	0.109975	0.550696	0.373002	0.00966714	0	0.74604	0	0.536964	2.50171	1.42291	0.482909	0.0607534	0	0	0.6166	0.603276	0.90827	0.373207	1.13373	0	1.287	0.295956	0.36981	0	1.07767	0.581763	1.30682	5.02553	High
TCGA.CZ.5463	0	1.8137	0	0.241267	0.111473	0	0	0	1.71388	0	1.49197	0	0.316848	0.476036	0	0	0	0.0752825	0	0	0.223419	0	0	0	0.776857	1.49436	1.13501	0	0	0.463189	Low
TCGA.CZ.5457	0	7.54521	0	0.168843	0	0.956018	0.554383	0	2.32164	0	0.575036	0.0927709	0.032075	0.731677	0	0.197187	0.751055	0	0	0.123836	0	0	0	0.107365	2.16542	1.80645	0	0.798078	0	0.273349	Low
TCGA.CJ.5686	0	5.58356	0.20773	0.741915	0.346343	0	0.959551	0	2.35692	0.500663	1.08899	0.93004	1.21599	1.31719	0	0.596854	0	0	0	0.146586	0.519081	0	0.501006	0	2.8461	1.45325	2.67549	0	0	0.867436	High
TCGA.CZ.4861	1	1.22192	0.23212	2.18495	0.6392	1.54045	0	0	1.78969	0.033609	2.4161	1.31965	0.545036	0.676682	0	1.6438	0.175903	0	0.247312	0.384873	0.621232	0	0	0.809526	0.379527	2.55979	1.85933	1.95063	0	1.69226	High
TCGA.B0.4842	1	4.72329	0.879381	0.775745	0.964651	0.270874	2.43069	0	1.98816	0	2.78332	1.95263	1.03184	1.95799	3.06668	0.00469387	0	0.207451	0	1.59002	1.56994	0	1.01124	0	1.33996	2.6458	1.71159	2.55184	0	2.35376	High
TCGA.CZ.5468	1	0.161644	0.317243	1.34367	0.446654	1.36732	0	0	1.89369	0	2.60899	2.0206	2.15557	3.42965	6.27604	1.05971	0	0.295207	0	2.50612	1.43834	0	1.21743	0	2.99963	0	6.77372	3.39552	1.39301	8.23143	High
TCGA.B4.5844	0	0.0191781	0	0	0	0.762276	0	0	1.77638	0	1.94509	0.0669071	0	2.12133	0	0.0975379	0	0	0	0	0	0	0.463013	0.22052	0.902012	0	0	1.00701	0	0.577324	Low
TCGA.AK.3451	0	7.85753	0	0	0.737468	0	0.135127	0	1.32141	0	0.761804	1.79988	1.30893	0.274808	0	0	0	0	0	0.802046	1.61484	0	0.224562	0	1.53197	0.798846	0.633281	1.84543	0	0.669493	Low
TCGA.CZ.4856	0	0.0493151	0	0	0	0	1.20353	0	1.57703	0	1.99106	1.54708	0.275333	1.40756	0	0.298781	0	0	0	0.701423	0.784808	0	0.638014	0.191551	0.517898	1.49553	1.08272	0	0	0.536915	Low
TCGA.BP.4331	1	6.72329	0.413151	0.0702684	0	0.27136	0	0	1.23821	0	1.74054	0.441447	0.335418	0.975852	0	0.371403	0	0	0	0.11042	0.191637	0	0.839444	0.16822	0	0.582786	0.586529	0	0	0.715508	Low
TCGA.B0.5094	1	0.912329	0	1.11774	0.377672	0	0	0	0.937589	0	3.45615	1.20997	0.8126	0.743239	2.34684	0	0	0	0.596351	1.06804	1.44514	0	0	0	2.45616	0.385095	5.873	3.43158	0	2.62362	High
TCGA.B0.4818	1	1.39726	0	0.822602	0	0	2.88327	0	2.0283	0.0500566	1.18801	0.588559	0	0.681928	0	0	0	0	0	0.06949	0.0279629	0	0.179281	0	0.00853107	2.8052	0	0	0	0.496068	Low
TCGA.MM.A84U	0	1.91781	0	0	0.332138	0	0.325371	0	1.14675	0	2.06782	1.20492	0	1.38268	0.59036	0	0	0	0	0.799129	0.852357	0	1.0364	0	2.10469	0.234154	2.41744	1.01974	0	1.01623	High
TCGA.BP.4776	0	1.12603	0	0	0	0	3.85849	0	2.09411	0	1.71955	1.02027	0	1.63026	0.246527	0	0	0	0	0.0861147	0.436953	0	0.869858	0	0.923487	1.31037	0	0.220589	0	0.677922	Low
TCGA.A3.3352	1	1.53699	0	0	0	0	0	0	2.15563	0	2.07298	0.186698	1.17681	1.04396	0	0.0938436	0	0.0874304	1.01059	0.231945	0.543963	0	0.135944	0	0.119694	1.19257	0.46892	0.817717	0	0.76941	Low
TCGA.CJ.6033	1	0.613699	1.10735	0	0.107484	0.353211	0	0	2.47219	0	2.24585	1.49593	0.834864	2.89622	0	0	0	0	0	1.13153	0.386801	0	2.18192	0.616949	1.35881	0.059693	4.44575	2.01217	0	1.20294	High
TCGA.AK.3426	1	2.42466	0.593988	2.97558	0	0.484155	1.86316	0.3297	2.95593	0	2.27072	1.10379	0.165274	1.23072	3.50099	0.724405	0.0808215	0	0.287055	0.493371	0.435981	0	0.652492	0.84773	1.42246	3.27377	4.18866	0.587596	1.17087	3.04107	High
TCGA.B0.4852	1	3.07123	0	0	0.0594207	0	0.177004	0	2.30949	0.256966	0.968397	0.183683	0.775265	0.765685	0	0	0	0	0.635899	0	0.235374	0	0	0	1.32616	1.11006	0.255767	1.22215	0	0.734503	Low
TCGA.BP.4972	0	4.11507	1.18984	0	0	1.40173	0	0	2.30259	0	2.32475	0.502703	0.308487	1.43039	0	0.808791	0	0	0	0	0	0	0.437069	0.839758	1.65518	2.04603	2.16793	0.263755	0	0.757323	Low
TCGA.BP.4993	0	0.484932	0	0	0	0	0	0	1.47342	0.065239	1.77931	0.537221	0	2.07012	0	0	0	0	0	0	0	0	0.336889	0.189898	1.21286	0.348648	0.210181	0.579916	0	0.448205	Low
TCGA.B4.5838	0	0.454795	0	0	0.265296	0	0	0	1.05724	0.172392	2.24118	1.20851	0.086035	0.88889	0	0	0	0	0.367027	0.449816	0.813383	0	0	0.347673	1.25474	0	1.40036	3.46785	0	1.1546	High
TCGA.CJ.4885	0	9.45479	0	0	0.0217676	0	0	0	2.06417	0.0835358	1.05935	0.561821	0.516646	1.21468	0	0	0	0.250892	0	0.107698	0.332178	0	0.309099	0	0.839726	0	0.602275	0	0	0.716115	Low
TCGA.B0.4696	1	2.3726	2.27457	1.71055	0.675199	3.15639	0	0.767804	0	0	0.942062	1.07229	0.989939	3.18072	2.00126	0	1.16891	0.647495	2.04945	1.14572	0	0	0	2.4036	0	0	3.91058	0.269783	2.87237	2.81935	High
TCGA.B0.4710	0	4.80822	0	0	0	0	1.8894	0.0133402	2.51	0	1.14516	0.335463	0.408629	1.08069	0.130199	0	0	0	0.554373	0	0.111355	0	0.757434	0	0.522174	1.23301	0.127952	1.68939	0	0.899021	High
TCGA.BP.4789	0	4.07945	0.453477	0	0	0.434091	0	0	1.77774	0	1.73578	0.0124569	0	1.96577	0	0.49351	0	0	0	0	0	0	2.00469	0.569315	0.0136811	0	0	0.639026	0	1.05623	High
TCGA.CJ.4903	0	4.27397	0	0.496646	0	0	0	0	2.52983	0	1.4771	0.68375	0.267069	0.934557	0	0.136134	0	0	0	0.299125	0.631145	0	0	0.013167	0.390799	1.81218	2.14888	0.0727172	0	0.42908	Low
TCGA.BP.4343	1	5.23836	0.315008	1.62996	0.313846	0.794842	1.27329	0	2.83959	0.908349	0	0.763772	0.999078	1.2825	0.406393	1.14838	0	0	0	0.166224	0.786849	0	1.19518	1.72011	2.87729	2.67117	5.85569	2.78312	0	2.2731	High
TCGA.A3.3383	0	2.3589	0	0.0292444	0	0	0	0.038991	2.06602	0	2.00524	1.10661	1.33062	1.214	0.9374	0	0	0	0.231668	0.398581	1.27894	0	0.704477	0	0.238825	1.44197	1.13113	1.12513	0	0.760659	Low
TCGA.B0.5113	0	3.21918	0.369424	1.29972	0	0.216144	0.869578	0	2.18352	0	2.42669	0.124955	0	1.07399	0	0.130981	0	0.0358263	0	0	0.166852	0	0.182196	0.0740216	1.29915	1.79663	1.95487	0	0	0.698971	Low
TCGA.B0.4718	0	4.87123	0	0	0	0	0.388429	0	2.70604	0	3.84864	0.824348	0.498854	2.59569	0.0340849	0	0.510533	0.252058	0	0.0636568	0.085307	0	1.29303	0	1.49844	0.595712	0.247213	3.0707	0	0.992793	High
TCGA.B8.4154	0	3.78082	0	0.050048	0	0	0	0	2.06125	0	0.148538	1.38062	0.960188	0.0728018	0	0.280795	0	0	0.457299	0.23982	0.502364	0	0	0	2.07544	2.00035	0.344799	0	0	0.599531	Low
TCGA.B0.5110	0	5.50411	0.757333	0	0	0.519637	0	0	1.64332	0	1.33027	0	0	1.78679	0	0.208562	0	0	0	0	0	0	0.988598	0.358949	0.651799	0.311228	0.459395	0	0	0.607618	Low
TCGA.BP.4968	0	4.78356	0.0194111	0.652868	0	0.393846	0.0295109	0	2.08225	0	2.4984	1.21396	0.70011	1.45993	0	0.0524283	0	0	0	0.372915	0.881904	0	1.09228	0.0166667	2.80859	1.56201	3.00004	1.69445	0	1.13659	High
TCGA.CJ.4900	1	4.69589	1.5417	2.11466	0.124024	0.622584	5.41309	0	2.66434	0.00304955	1.83558	0.650302	0.642067	1.92846	2.90895	0.295767	0.374231	0.00297855	0.718592	0.573967	0.558542	0	1.50553	0.473367	0.672593	4.12304	1.75338	1.7697	0	2.22381	High
TCGA.BP.4988	1	2.26849	2.53052	3.67513	0	0.961754	4.6732	0	3.35015	0.29716	2.74736	0.363466	0	1.62899	0.735745	0.899594	0.0918074	0	0.573904	0	0.17074	0	0.676007	0.19087	1.38087	1.42866	4.85689	0	0	5.12622	High
TCGA.DV.5568	0	1.0137	0.703792	0.0726015	0.512911	1.26165	0	0	2.03365	0	2.32291	1.83702	0.0232275	2.92508	1.03701	0.0162629	0	0	0	1.2232	0.443368	0	1.22258	0.506905	4.3432	0.835196	5.91897	2.06661	0	1.56518	High
TCGA.BP.4159	1	7.12603	0	0	0	0.0218185	0	0	2.31425	0.204119	1.83917	1.0755	0.330557	1.75579	0	0.540953	0.0747939	0	0	0.0398378	0	0	1.98409	0.418151	0	0.615345	1.20616	0.755593	0	1.3678	High
TCGA.B8.4148	0	4.16438	0.383222	1.89885	0	0	0	0	1.61348	0.390201	1.03127	0	0.505854	0.00663255	0	0.603562	0	0	0.333309	0	0.0041505	0	0	0	0.0221349	2.60809	0	0	0	0.946752	High
TCGA.A3.3347	1	4.41096	1.27098	1.7995	0.397423	1.35011	1.31517	0	2.34885	0.0846063	2.35653	0.84292	0.871129	1.4096	3.3866	1.31015	0	0	0.698186	1.00378	0.87685	0	0.279948	1.12994	0.526255	2.44092	5.01154	1.05046	0.570538	3.29444	High
TCGA.A3.3367	0	6.21918	0	0	0	0	0	0	1.82663	0	2.39083	0.816181	0.945312	0.689799	0	0.12962	0	0	0	0.0476154	0.418389	0	0	0	1.54285	0.55149	1.3505	0.982311	0	0.620921	Low
TCGA.MM.A564	0	1.66301	0.161768	0	0	0.0305675	0	0	3.98599	0	2.89079	1.20764	0.795877	1.77882	0.799692	0	0	0	0	0	0	0	2.92439	0	0.878789	0	4.08661	0.87848	0	3.83241	High
TCGA.BP.5168	1	4.00822	0	0	0	0	0	0	2.56044	0	0.72896	0.144304	0.353599	2.06594	0	0	0	0	0	0	0.633769	0	1.11307	0.156943	1.38223	0.68202	0	1.36604	0	0.482405	Low
TCGA.BP.5190	0	2.76986	0	0	0	0	0	0	1.41695	0	0.270589	1.52598	1.59099	0.504991	0	0	0	0	0	0.626174	1.04227	0	0	0	0.588735	0	0	0	0	0.415088	Low
TCGA.B0.4822	1	3.04384	0.786485	0.849141	0.0963927	0.661954	1.14533	0	2.73432	0	2.83696	1.65676	0.000573958	2.87125	2.74597	0	0	0	0	0.954584	0.841083	0	1.79908	0	2.37152	1.44207	5.43055	3.87851	0.346263	3.79305	High
TCGA.CJ.6032	0	9.96986	0	0	0	0	0	0	1.19292	0.765966	0.942645	0.247273	0.583342	0.678139	0	0	0	0	0	0.683048	0.0585788	0.18759	0	0	2.58792	0.866006	0	0	0	0.93911	High
TCGA.B0.5713	0	7.62192	0	0	0	0.307522	0	0	0.973065	0	0.396624	0.422681	0	1.13394	0	0.406305	0	0	0	0	0.327902	0	0.0532538	0	0.677646	0.961936	0	0	0	0.365391	Low
TCGA.CJ.4875	1	9.73699	0	0	0	0	0	0	1.63029	0	1.61742	0.601394	0.151857	0.857991	0	0	0	0	0.38238	0	0.449588	0	0.444551	0	0.609141	1.59563	0.158181	0.956062	0	0.693138	Low
TCGA.A3.3351	0	2.49315	0.0658592	2.25698	0	0	0	0	2.90782	0	1.88582	0	0.207081	0.941067	0	0.920204	0	0	0.576139	0	0.0904583	0	0.844886	0.483477	0.546758	2.0367	3.40622	0	0	1.3402	High
TCGA.BP.4995	0	3.75616	0	0	0	1.08871	1.22821	0	1.31441	0	1.87076	0.365703	0.296819	0.458449	0	0	0.279539	0	0	0	0.478066	0	0	0	0.650438	1.04844	0	1.2729	0	0.606623	Low
TCGA.B8.5551	0	0.0438356	1.47786	4.03336	0.937019	1.64544	4.41893	0	2.64704	0.251418	2.97951	1.03048	1.27218	2.31235	0.485111	1.81209	0.296747	0	0.832865	0.994931	1.02663	0.224801	0.476326	0.728257	0.873542	4.26271	2.24753	2.64284	1.66947	5.28947	High
TCGA.BP.4970	0	1.1863	0	0.136179	0	0.211478	0	0	2.11986	0.0579398	1.57952	0.318934	0	0.862752	0	0.892691	0	0	0	0.118684	0.293981	0	0	0.725146	1.48853	1.4654	3.25625	0	0	0.450863	Low
TCGA.BP.4964	0	5.10137	0.293047	0	0.0093139	0.1828	0	0	2.14649	0	2.95881	1.03437	0.546883	1.36714	0	0	0	0	0	0.410539	0.575648	0	0.52627	0	2.69004	1.49698	4.75406	1.76649	0	0.783145	Low
TCGA.B0.5707	0	10.2575	0	0	0	0	0.177392	0	0.41031	0	0.817194	0.431237	0.242179	0	0	0	0	0	0	0.505815	0.648834	0	0	0	3.00701	0	0.835646	1.26872	0	0.552741	Low
TCGA.BP.4774	0	5.16438	0.163128	0	0	0	0	0	1.1659	0.114679	1.68671	0.69921	0	1.14851	0	0	0	0	0	0.16671	0.258311	0	0.728089	0	0.738572	0	0	0.830453	0	0.820139	Low
TCGA.AK.3443	0	3.89863	0	0	0	0	0	0	0	0	0	0	0.346113	0	0	0	0	0.0793642	0	0	0.590907	0.717383	0	0.608589	0	0	0	0	0	1.91249	High
TCGA.CJ.4902	0	4.16438	1.88929	0.678532	0	0.684799	0.97053	0	3.19736	0	1.83587	0.770676	0.830586	2.45946	0	0.36139	0	0	0	0.190529	0.0906526	0	1.76391	0.599645	0	1.48454	3.92885	1.252	0	1.14545	High
TCGA.B8.4143	1	1.94247	1.10346	4.27037	0	0.55891	1.49676	0.389261	3.1577	0	3.23868	0.890272	0.943271	1.62579	3.25871	0.667143	0	0	1.08483	0.014755	0.867228	0	1.54508	0.243656	0	3.54523	0.427806	2.86479	1.16096	12.3074	High
TCGA.BP.4994	0	3.58356	0	0	0	1.35526	0.724806	0	0.737466	0	1.35544	0.13565	0.338335	0	0	0	0	0	0	0	0.628035	0	0.0697725	0	0.732547	0.396564	0	0.956548	0	0.889076	High
TCGA.BP.4777	0	4.74247	0.298391	1.83936	0	0.547537	2.40368	0	2.58037	0.198085	1.61723	0.768731	0.977786	0.635192	0	0.710114	0	0	0	0.094184	0.790931	0	0	0.407944	1.11103	2.94088	1.05823	0.370017	0	0.791388	Low
TCGA.BP.4354	1	2.83288	1.58368	3.17273	0.540446	2.77465	0	0	2.55111	0.486454	1.94665	0.00176131	0.92052	2.74726	2.07114	1.67287	0	0	0.346135	0.831601	0.982888	0.172628	0.973537	1.8878	1.46366	1.70886	3.03046	0.858258	0.187093	6.25146	High
TCGA.BP.4355	1	2.61096	0.481949	0	0	0	0	0	1.93412	0.211029	2.12525	0.21295	0	1.9681	0	0	0	0	0	0	0	0	1.91763	0.242295	0.449976	0	0.463866	0	0	1.15789	High
TCGA.A3.3346	1	0.375342	0	1.64814	0.751673	1.9395	0	0.679484	2.77534	0	2.91888	2.07126	1.04477	1.64551	2.24733	0.227811	0.124668	0.148072	1.10776	2.15078	0.804441	0	0	0	2.88293	0.633229	6.65349	3.5849	1.68608	6.47839	High
TCGA.A3.3365	0	2.39178	0.615657	0.12811	0	0.13157	0.41544	0	2.62284	0.210737	1.75745	0	0	1.36412	0	0.553494	0	0	0	0	0	0	0.762098	0.657292	0.146416	0.480539	0.865972	1.51304	0	0.833045	High
TCGA.B0.4824	1	4.53973	0	1.53031	0	0	0	0	1.01185	0	1.80565	0.685986	0.505076	0.120315	0	0.435082	0	0	0	0.103712	0.183472	0	0	0	1.14863	2.18035	0	0.212617	0	0.683612	Low
TCGA.G6.A8L6	1	0.857534	1.09607	0	0	0.250556	0.0256244	0	3.43743	0	2.76923	1.2827	0.341738	1.62452	0	0	0.131473	0	0	0.188682	0.206896	0	2.24275	0	0.735462	1.07857	0.993203	0.623082	0	1.86215	High
TCGA.A3.3323	0	3.03014	0.0590572	1.3529	0	0.986931	0	0	1.7652	0	2.2578	0.44203	0.357099	1.67456	0.0781088	0.464636	0	0	0	0	0	0	1.03602	0.6047	2.513	0.868436	5.1583	1.03889	0	1.38368	High
TCGA.EU.5905	0	0.326027	0	0	0.412698	2.90345	0	0	1.17192	0	1.37604	0.606547	0.583342	1.70566	0	0.0151935	0	0	0	0.692381	0.872574	0	0	0.695205	2.11956	0	7.23561	0.326851	0	0.838544	High
TCGA.BP.5196	0	2.78904	0.428699	1.14467	0	0	0.0222237	0	2.90753	0	2.44097	1.06354	0.330362	2.02105	0.83769	0	0	0	0.116714	0.485885	0.50285	0	1.74622	0.392487	2.70141	1.19189	5.41811	1.042	0	1.76246	High
TCGA.CJ.5675	0	10.7836	0	2.20954	0.0172921	0	0	0	2.03404	0.0918083	1.67213	1.03641	0.661706	0.281026	0	0.683768	0	0.0977317	0	0.855808	0.817659	0	0	0	1.36668	2.62335	1.28139	0	0	0.816695	Low
TCGA.BP.4807	0	0.578082	0	0	0.295458	1.27147	0	0	1.47799	0	1.75735	0.727116	0.0136022	0.8474	0	0.580618	0	0	0	0.27025	0.00852421	0	0.0967853	0.623171	1.39204	0.193819	2.96709	1.27144	0	0.98701	High
TCGA.B8.A54H	0	0.70137	0	0.17487	0	0	0	0	2.52059	0	1.28528	0.488118	0.157009	1.37598	0	0	0	0	0	0.099045	0	0	1.35405	0	0.115516	0.469847	0.259849	0	0	0.827541	High
TCGA.B0.5109	1	1.60822	2.62293	2.1272	0.754689	1.2147	4.27279	0.93026	1.98078	0	2.07822	1.68369	1.60771	1.56312	1.08939	1.02588	0.804429	0	1.30832	0.749255	0.581771	0.219166	0.803881	0.225575	3.028	3.85527	2.0336	1.25278	1.99665	2.77534	High
TCGA.B0.5711	0	10.9288	0.338426	0	0	0.294982	0.957122	0	2.12083	0	1.53366	0.338186	0.1223	1.58138	0	0.0665251	0	0	0.37723	0	0.251897	0	0.312111	0.0754798	0	1.46073	0	0	0	0.51003	Low
TCGA.CJ.4869	0	6.99726	0.164974	1.96816	0.0365564	0	2.16942	0	3.35695	0.0720517	1.65007	1.15445	1.12119	1.42135	0.773355	0.700975	0	0	0.508994	0.546939	1.04072	0	1.00687	0.230241	0	2.49205	2.37389	1.69581	0	1.60977	High
TCGA.BP.5010	1	2.40548	1.35591	0	0	0.38918	0	0	1.78804	0	2.03002	1.35952	0.0977993	2.42147	0.65314	0	0	0	0	0.832087	0.00483086	0	1.71202	0.299942	1.4039	0.565388	4.24057	0.776398	0	1.21795	High
TCGA.BP.5001	0	3.22466	0.0586685	0	0	0	0	0	0.728427	0	1.68797	1.48135	0	0.436101	0	0	0	0	0	0.661562	0.373874	0	0.510432	0	1.66519	1.03337	0	0	0	0.730548	Low
TCGA.B2.4099	0	2.66301	0	1.83294	0	0	0	0	1.74469	0.0403243	0.58932	0.305127	1.1805	0.504991	0	0.870136	0	0	0.550875	0.0353657	0.839528	0	0.16733	0	0	2.82561	1.62158	0.911535	0	0.674423	Low
TCGA.AK.3429	0	9.11781	0	1.37934	0.256053	0	0.543889	0	2.77767	0.155944	0	0.250968	0	0.454951	0	0	0	0	0	0.21046	0.520442	0	0.0916354	0.122627	1.04942	2.27297	0.86257	0.871771	0	0.580168	Low
TCGA.B0.5106	1	4.37808	0.319963	1.69354	0	0	0	0	2.98557	0	2.76145	0.109884	0.145634	2.184	0	0.424679	0	0	0	0	0.364641	0	1.54975	0.45898	2.853	1.27295	3.06691	0.313143	0	1.11041	High
TCGA.B8.A54I	0	0.410959	0.543653	2.46512	0.301003	0	6.93048	0	2.85387	0	2.42134	1.41047	1.61549	2.10054	0	0.448595	0.0955989	0	0	1.0798	1.39042	0	2.99464	0.213229	3.62638	4.13519	4.73831	1.54356	0	1.81784	High
TCGA.CW.6087	1	0.112329	1.41956	4.77559	0.212465	1.97557	0.906111	0	0.996878	0.484799	0.344441	0.0190687	1.10865	0.683192	1.85879	2.20174	0.869469	0.0505981	0.638037	0	0.794333	0.303498	0	1.52481	1.35998	4.56099	1.45246	0.674025	1.05912	3.71257	High
TCGA.B0.4827	1	2.42466	0.174983	1.13057	1.73921	0.391804	3.0639	0	2.0285	0	2.3368	1.2722	0.360988	1.70294	0	0.773987	0	0.122416	0.518517	0.681492	0.201162	0	0.947496	0.00402914	0	2.70752	0.720176	2.68911	0	2.09495	High
TCGA.BP.4761	0	0.49863	0	0.753289	1.3119	0	3.51765	0.413745	2.85174	0	3.90354	2.61702	0.570898	1.8309	4.5459	0	0	0	1.15032	2.58604	2.72625	0	1.42265	0	3.74405	2.44821	4.46247	3.39892	0.896262	7.94343	High
TCGA.B0.5694	1	1.31507	0	0	0	0	0	0	2.49736	0	2.13876	1.50663	0.635552	1.97053	0	0.0800385	0	0	0	0.999889	0.186194	0	1.09645	0	0.764516	0.330861	3.88861	0	0	0.711846	Low
TCGA.A3.3335	0	5.16712	0	0.288123	0.431087	0	0.793597	0	2.68476	0	3.58413	1.27726	1.22688	0.670949	1.57482	0	0	0	0	0.794462	0.957812	0	0.832448	0	3.7183	0.0547361	3.37376	3.92235	0	2.74705	High
TCGA.BP.4332	0	3.10411	0.559589	0	0	0.246279	0	0	1.8761	0	1.73355	0.386413	0.25161	1.47246	0	0	0	0	0	0	0.366585	0	0.751118	0.203313	0	0.871935	2.84481	0.159632	0	0.581772	Low
TCGA.A3.A8OW	0	0.884932	0.171679	0	0	0	0	0	1.62728	0	0.692228	0.397303	0.108883	1.56069	0	0	0	0	0	0	0	0	0.9439	0	0	0.0852547	0	0	0	0.55273	Low
TCGA.B0.4819	1	0.50137	1.87976	3.04665	0.030135	0.204867	3.5227	0	3.51149	0.153219	2.77302	0.142165	0.0270192	1.62316	1.10834	0.31978	0	0	0	0	0.741168	0	1.43052	0.525278	0.976056	3.55747	2.76074	1.22264	0	2.30979	High
TCGA.B0.4823	1	1.24384	0	0	0	0.594392	0.39387	0	1.83703	0	2.59781	1.3074	0.276597	1.48956	0	0.492927	0	0	0	0.265195	0.639504	0	0.456989	0.614324	1.68715	1.2054	3.82203	1.81617	0	0.835718	High
TCGA.BP.4161	0	7.52329	0	1.32199	0	0.279137	1.1565	0	1.83003	0.13463	2.2097	0.677722	0.585579	0.880436	0	0.568369	0	0	0	0.622966	0.435009	0	0.406656	0	1.57016	2.55172	3.49934	0.8218	0	0.785966	Low
TCGA.B0.5075	1	1.74521	0	0.462816	0.279501	0.831685	0	0	2.12735	0.0397404	2.52707	1.09252	1.11303	0.282095	0	0.652658	0	0	0.877953	0.393039	1.86288	0	0	0.00791761	0	2.22787	0.983289	1.74024	0	1.42288	High
TCGA.BP.5006	0	2.30137	0	0	0	0	0	0	0.989005	0.297257	1.93625	0.704752	0.298278	0.909586	0	0.181535	0	0	0	0.276375	0.430149	0	0.158585	0	0.743625	0.203636	0.350243	0.434474	0	0.686568	Low
TCGA.A3.A6NJ	0	1.28219	0	0.525227	0	0	0	0	1.85248	0	1.1816	0.609853	0	0.858185	0	0.0898576	0	0	0	0.0203937	0.2691	0	0.0550029	0	1.94475	1.76971	0.327984	0	0	0.467197	Low
TCGA.BP.4784	0	5.07945	0	0	0.161872	0.328325	1.76687	0	2.28023	0.0261151	1.23922	0.392539	0	1.90902	0	0.37014	0	0	0	0	0	0	1.86418	0.940373	0	0	3.27724	0	0	0.982463	High
TCGA.B0.5706	0	8.78082	1.02543	1.7994	0	0.418051	5.51968	0	2.85174	0	2.92092	0.545291	1.06723	1.86938	0	0.227617	0	0	0	0.730297	0.126614	0	2.13966	0	0	4.86161	6.15467	2.28497	0	1.3123	High
TCGA.BP.4982	0	2.77808	0.592044	0	0	0.72067	0	0	1.94909	0	1.4533	0.391955	0	1.33964	0	0.480775	0	0	0	0	0	0	0.45524	0.387529	0.978097	0.531954	2.12905	0	0	0.669119	Low
TCGA.B0.4700	1	5.42466	1.85275	1.73514	0	1.38287	2.53378	0	2.55743	0.183779	2.29317	1.65938	1.63901	2.93275	1.75481	0.583438	0	0	0	1.46091	0.810273	0	0.971399	0.810692	1.4417	2.81822	5.25317	3.08878	0.597163	1.65661	High
TCGA.BP.4797	0	3.03288	0.13524	0.455136	0.200012	0.709977	0	0	1.58529	0.0839251	1.61441	0.79722	1.00131	1.39998	0	0.606965	0	0	0	0.364748	0.884237	0	0.875008	0.636003	0.529559	1.61896	3.05029	2.32949	0	0.817507	Low
TCGA.BP.4763	1	3.47945	0	0.975227	0.242432	1.4204	0	0	2.64403	0.508254	1.50995	0.767078	0.409406	1.24782	0	0.296934	0	0	0.565839	0.0109634	0.77849	0	0	0.892253	2.86068	0.526025	6.50721	0.15448	0	1.99018	High
TCGA.CJ.4642	0	8.78082	1.10016	0.777787	0	0	0	0.770331	1.26543	1.65423	2.44923	1.4619	1.19615	2.2561	0	0	0	0	0	0.281819	0	0	0.72634	1.7971	0	0.609417	1.3922	0.754232	0	1.52353	High
TCGA.B0.5697	0	7.20548	0	1.19707	0	0	0	0	1.64507	0.0677694	1.54046	0.856046	0.311792	0.683677	0	0.798	0	0	0	0.337527	0.815132	0	0	0.34534	2.1181	2.20639	1.18342	0.224673	0	0.540103	Low
TCGA.B0.5121	0	4.06849	0	0	0	0	0	0	2.48628	0.233803	1.50528	1.01823	0.0516172	1.9235	0	0.0553449	0	0	0	0.0148522	0.34841	0	1.0502	0.313649	0.562111	0.656264	0.404381	1.81666	0	0.924455	High
TCGA.B0.5399	0	3.86575	0.379821	0	0	0	0.41204	0	1.98719	0	2.15412	1.50478	0.379655	1.22625	0	0	0	0	0.142367	0.761408	0	0	0.74762	0	1.06856	1.01248	0.575643	0.248686	0	0.816393	Low
TCGA.BP.4338	0	7.83288	0	0	1.86502	0.593712	1.31701	0	1.25493	0	1.9585	2.18288	1.79195	3.37884	4.84036	0.131856	0	0.0299954	0.895346	0.908696	2.31755	0	0.12477	0.199522	4.17141	0.644795	3.11298	3.7914	0	2.70003	High
TCGA.B2.5639	1	2.74795	0	0.32662	0.489269	0	1.22655	0	1.78901	0.696185	0.307321	0.380093	1.04341	0.365657	0	0.00274949	0	0	0	0.427942	0.82145	0	0	0	0.922224	1.09052	2.08901	0	0	0.664007	Low
TCGA.A3.3306	0	3.06849	0	0.718	0.240389	0	0	0	3.0712	0	2.42611	0.928679	0.651303	0	0	0	0	0	0.353715	0.65184	0.69714	0	0	0	1.89315	0.538174	0	1.68842	0	1.28921	High
TCGA.BP.4170	1	6.41918	0	0.315732	0	0	0	0	2.11354	0.360517	1.56223	0.464102	0.375572	1.18281	0	0.437804	0	0	0	0.187904	0	0	0.396647	0.162679	1.19586	1.84804	2.6023	0	0	0.605378	Low
TCGA.B0.4706	1	0.178082	0	0	0	0	0	0	1.73429	0	2.76612	0.814333	0.750376	0.701459	0.240113	0	0	0	0	0.090198	0.19465	0	1.66149	0	0	0.611263	1.04481	1.07953	0	1.57283	High
TCGA.A3.3378	0	1.72603	0.742758	1.97283	0.704777	1.20838	2.09703	0	2.15524	0	2.31183	0.244162	0.471922	1.53601	0	1.45306	0	0	0.813625	0.675367	0.204661	0	0	0.36799	0	3.05936	1.97684	1.97619	0	1.27316	High
TCGA.B0.5084	1	0.608219	0	0	0.321046	1.82791	0	1.85087	0.3275	0	2.71947	1.60347	0.445671	0	1.33877	0	0.399994	0	1.12457	0.176335	0.944011	0	0.813986	0.737297	0	0.343011	1.3609	2.14954	2.29672	3.08852	High
TCGA.B2.3923	0	2.71781	0	0	0	1.51304	0	0	0	0	0	0	0.599968	0	0	0	0	0	0	0	0.116603	0	0.454657	0	0	0	0	0	0	0.80103	Low
TCGA.B0.4703	1	0.49863	1.90474	1.7714	0.634919	0.722322	0	0	2.57755	0	3.61503	0.8717	1.11293	2.64427	2.14043	0.408833	0	0	0.530857	0.480829	0	0	2.01635	1.1276	1.9327	1.41466	5.46127	2.03365	0	4.93627	High
TCGA.A3.3319	0	3.09589	0	1.07098	0.278334	0.745653	0	0	2.04949	0.0104461	3.44128	2.35148	1.25682	0.562416	1.30154	0.891038	0.755625	0	0.609858	2.12356	2.83423	0	0	0.200397	1.67432	0.892345	4.87157	1.79556	0.640988	1.22294	High
TCGA.AK.3454	0	2.39452	0	0	0	0	0	0	1.58918	0.279934	1.80954	0.441447	0.0111715	1.21808	0	0	0	0	0.284529	0.148919	0.638046	0	0.477394	0	0.715348	0	0	0.393544	0	0.864162	High
TCGA.G6.A5PC	1	0.663014	0	0	0.664886	0	0	0	1.12906	0	1.92741	1.94087	0.901172	0.55542	0.198518	0	0	0	0	1.26306	1.55876	0	0.118162	0	1.26251	0.254273	0	1.04968	0	0.706134	Low
TCGA.B0.4844	1	0.857534	0	0.443179	0.12383	0	0.940215	0	1.94812	0	2.92344	1.52656	0.485145	1.57594	2.27162	0	0	0.522809	0.158012	1.227	0.802303	0	0	0	4.46758	0.677452	6.40068	1.49457	0	2.41202	High
TCGA.B4.5832	0	0.424658	0	1.17636	0.878448	1.35206	0	0	2.40493	1.54017	0.0379541	0	1.69541	0	0	1.29226	0	0	0.326993	0	1.06404	0	0	0.865228	1.28486	1.23748	3.97852	0	0	3.07356	High
TCGA.B8.5545	0	4.17808	1.339	0.980282	0	1.97654	0.204015	0	2.62508	0	0.98375	0.0408488	0	2.32547	0.0852031	0.855456	0	0	0	0	0	0	1.62019	1.08775	0.120083	1.09111	4.26263	0.119286	0	1.34165	High
TCGA.A3.3317	0	4.08493	0.848286	0.238642	0.00211409	1.12303	0	0	1.24453	0	1.45135	0	0.575273	0.741782	0	0.459192	0.393092	0	0	0	0.532883	0.0982068	0.805532	0.441093	0	1.38162	0.348493	1.32268	0	0.75129	Low
TCGA.BP.4977	0	1.24384	0	0	0	0	0	0	1.03362	0	0.99133	0.628133	1.33859	0.811449	0	0	0	0	0.184637	0	1.02196	0	1.04845	0.26164	0	0.560043	4.08213	1.36497	0	0.719376	Low
TCGA.A3.3387	0	1.69041	1.08917	0.851766	0.105247	0.0422329	0.190023	0	2.451	0	2.02633	0.641259	0.638664	1.49121	0	0.577799	0	0	0.553596	0.215029	0.817271	0	0.761126	0.960107	0.677743	0.580745	2.22149	0.497959	0	0.993173	High
TCGA.A3.3343	0	2.58904	0	0.972505	0	0	0	0	2.3889	0	2.43728	0.588754	0.212233	1.35275	0	0.090052	0	0	0	0.127336	0.180557	0	0.825063	0	1.71475	1.83823	0.321375	0	0	0.765975	Low
TCGA.BP.4981	1	3.00548	0	0	0	0	0	0	2.96895	0	2.31212	0.872576	0	1.36451	0	0	0	0	0	0.24157	0.602668	0	0.938945	0	0.606615	0.791556	2.13799	0.693955	0	0.865036	High
TCGA.B0.4810	1	1.30959	0.702529	1.22779	0	0.709588	0.142802	0	1.99954	0	2.54223	1.08483	1.10768	2.40981	2.12177	0.115621	0	0	0	0.846961	0.199704	0	2.18115	0.475603	0.0170821	1.79867	4.60817	3.10162	0.466952	2.7553	High
TCGA.BP.4765	0	5.98356	0.322198	0	0	0	0	0	0.726289	0	2.35624	0.658859	0	1.06136	0	0	0	0	0	0	0	0	0.12545	0.189023	1.97749	0	0.00460878	1.26415	0	0.668004	Low
TCGA.BP.4329	1	2.31507	0	0	0	0.584866	0	0	2.31202	0	2.85785	1.25966	1.02611	1.04513	0.161686	0.310642	1.18349	0	0.0894092	0.437566	0.347729	0	1.22909	0.522265	1.04689	0.644406	1.09905	1.23965	0	0.532427	Low
TCGA.B4.5835	0	0.0438356	0	0.055978	0.10943	1.30219	0	0	0.724636	1.95564	0.40809	0.546555	2.36947	0	0	0.418166	0	0.573636	0.429702	1.81537	1.8031	0	0	0	2.949	0.774839	0	0.0705784	0.0906005	4.89951	High
TCGA.B0.5077	1	3.60822	0.169347	0	0	0.0396082	0	0	1.40888	0	2.44418	0.864991	0.578676	1.33653	0	0	0	0	0.170547	0	0.342772	0	0.993262	0	0	1.20054	3.07731	1.39034	0	0.903232	High
TCGA.BP.4330	0	5.1726	0.889196	1.59749	0	0	2.96197	0	1.81098	0	1.82586	0.200699	0.406587	0.937083	0	0.401347	0	0	0.118755	0	0.0835575	0	0	0.148875	0.0665418	3.43666	0.507994	0.17684	0	0.462777	Low
TCGA.A3.3307	0	3.93425	0	0	0	0.0452464	0	0	1.85598	0.105336	1.0576	0	0.673179	0.845943	0	0.0108187	0	0	0.0716269	0	0	0	0	0.201952	0.0460388	0.878933	0	0	0	0.378514	Low
TCGA.CW.5581	0	7.66849	0	0	0.0333457	0	0	0	1.42278	0	1.33348	0.930526	0.285833	1.78115	0	0	0	0	0	0.137836	0.62162	0	0.180253	0	3.35906	0.326974	1.07981	0.913479	0	0.453412	Low
TCGA.BP.4335	1	1.30137	0.365731	1.34454	0	0.13575	2.40329	0	2.66765	0.0167721	2.14352	0.733339	0	1.47421	0	0	0	0	0	0.0867953	0.164908	0	0.863445	0.16054	0.993838	2.61976	0.768385	0.134452	0	0.826356	High
TCGA.CJ.6030	1	6.29863	0.0285453	1.58612	0	0.3292	1.15465	0	3.36832	0.062806	1.28227	0.629883	0.485242	1.67767	0	1.34923	0	0	0	0.720186	0.446186	0	0.290539	0.592452	0.983344	2.44257	3.83	0.589346	0	0.519682	Low
TCGA.CJ.4904	0	9.04658	0.327834	0	0	0.152859	0	0	2.93318	0.328012	1.08063	0	0	1.8378	0	0.174146	0	0	0	0	0	0	1.03252	0.394237	0.746831	1.42457	1.53722	0.790592	0	0.663184	Low
TCGA.BP.4975	0	3.92603	0.467664	0	0	0.400067	0	0	2.23999	0	2.23613	1.06305	0	1.16464	0	0.219256	0	0	0	0.251973	0.156161	0	0.470884	0.319481	1.30916	0.477137	1.21267	1.37061	0	0.954754	High
TCGA.BP.4986	0	2.15068	1.14505	0.994864	0	1.62794	0.987242	0	2.06281	0.108645	2.71316	0.754827	0	1.94546	0.0732496	0.557772	0	0	0	0.341027	0.199412	0	1.22899	0.913056	2.20283	1.4202	5.85375	0.32374	0	1.76852	High
TCGA.BP.4798	1	0.915068	1.11182	4.13709	0.451227	0.981682	2.07702	0	3.24926	0.640321	1.03749	0	0.36303	0.93514	0.96189	1.73111	0.291302	0	0	0.71445	0.204272	0.262012	1.07294	1.35041	0.0413747	4.01175	4.03286	0.781648	0	4.27382	High
TCGA.CJ.5681	1	1.51233	0	0	0.724819	0	0	0	0	0.299982	3.11653	0.397498	0	0	0	0	0	0	0.123322	0	0.875101	0.768875	0	0.0909364	1.54625	0	0	0	0	6.18973	High
TCGA.BP.4965	0	5.12603	0	0	0	0.585838	0	0	2.10995	0	0.718951	0.0641846	0.127356	1.4849	0	0.543286	0	0	0	0	0	0	0	0.381308	0.572119	0.215591	1.53829	0	0	0.392786	Low
TCGA.BP.5175	0	2.55342	0	0.30951	0.862102	0	0	0	1.88747	0	2.96921	3.18826	1.22853	1.87375	0.0929778	0	0	0	0	2.2026	1.8205	0	0.517136	0.0478716	1.95874	0.62798	6.57972	3.49351	0.472782	1.08452	High
TCGA.B8.4621	0	2.1589	0	0	0.253816	0	0	0	1.0376	0.0221249	0.710691	0.926734	1.2332	0	0	0.128842	0	0	0	0.337818	1.05141	0	0	0.344659	3.91439	1.0705	0.350923	0	0	0.441087	Low
TCGA.G6.A8L7	0	5.84384	0	0.192563	0.82299	0	0.206638	0.761489	2.83939	0	3.94669	2.25892	1.31953	1.60898	4.60965	0	1.51083	0.707068	0	3.05114	0.92292	0	1.30313	0	3.20825	0	2.16589	3.83116	1.75994	2.7197	High
TCGA.B0.5698	0	9.94795	0	0	0	0	0.775233	0	2.46976	0.190007	1.12096	0.330893	0.571773	1.71333	0	0.287795	0	0	0	0.0278797	0.191928	0	0.108543	0.113101	0	1.96662	0	0.33424	0	0.313904	Low
TCGA.B8.5164	0	0.0712329	0	2.15112	0	0	0	0	2.09547	0.480225	1.01086	0.153152	0.523354	0.127311	0	1.07002	0	0	0	0	0.168602	0.050406	0	0.466951	0.77161	3.47301	1.12228	0	0	0.848248	High
TCGA.BP.4787	1	1.31507	0.220362	0.327786	0.230465	1.04118	0	0	2.56083	0	1.65483	1.65938	0.976716	2.04661	2.00204	0.9588	0	0	0	1.41969	1.75927	0	0.439596	0.982854	3.52338	1.03473	7.22618	0.664789	0	0.900795	High
TCGA.BP.4775	0	5.04932	0	0.0946689	0	0	0	0.169188	2.40668	0	1.56582	0	0.515576	0.619743	0	0	0	0	0	0	0	0	0.0860968	0	2.08973	1.21124	0	2.707	0	0.539878	Low
TCGA.CJ.4878	0	5.98904	0	0	0.161483	0	0	0	1.23889	0.266017	1.21872	0.0916041	0	0.865279	0	0	0	0.237578	0.0129356	0.0967117	0	0	0	0	1.59027	0	0	0.25588	0	0.777164	Low
TCGA.AK.3433	0	9.33973	0	0	0	0	0	0	0	0	0	0	1.34851	0	2.04878	0	0	0.160123	0	0	0.722021	0	0	1.17524	0	0	0	0	0	0.539052	Low
TCGA.B0.4821	1	3.36986	0.672114	1.24558	0.560099	0	0.403004	0.455914	3.01804	0	3.66245	2.44784	0.875407	2.61191	4.74843	0	0	0.270523	0	1.16769	1.67393	0	1.36746	0.356811	4.08658	0.374501	4.89558	2.61153	3.46979	9.29853	High
TCGA.B0.5108	0	4.88219	2.38311	1.35883	0	1.76968	0.558658	0	3.27861	0	2.20581	0.283444	0.385003	2.58179	0.133795	0.745113	0.0886963	0	0	0.117031	0.065188	0	2.08223	1.28353	3.48849	3.16627	6.93556	0.964228	0	1.64078	High
TCGA.B0.4846	1	3.28767	0	0.0593805	0	0	0	0	2.06067	0.341442	1.24223	0.0893678	0.372752	0.472344	0	0.381514	0	0	0	0	0	0	0.707684	0.0537043	0.501185	1.67076	0.024437	0.251992	0	0.757042	Low
TCGA.B4.5836	0	0.386301	0	0	0.404525	0.0114169	0	0	1.77055	0.00304955	1.79642	0.583406	0.316265	1.23907	0	0.235491	0	0	0	0.35911	0.0817109	0	0	0.172886	0.65452	0.681825	3.6462	0.468987	0	0.449656	Low
TCGA.CJ.4920	1	0.380822	0.955175	0.0120376	0.320073	1.26904	0	0	2.81111	0	2.75523	1.0089	0.128717	2.02319	0.964028	0.0594281	0	0	0	1.3144	0.120491	0	1.52302	0.0124866	2.45839	0	3.77703	1.02781	0	2.19989	High
TCGA.EU.5906	0	0.564384	0.181785	0	0	0.149457	0	0	1.64954	0	1.19889	0.490355	0	1.43321	0	0.315891	0	0	0	0	0	0	0.310265	0.115628	0.809603	0.430679	0	0	0	0.480232	Low
TCGA.CZ.5455	1	1.53699	0	1.52361	0	0.68091	0	0	1.98204	0.0779884	0	0.048044	0.600746	0.738187	0	0.804708	0	0	0.481106	0	0.166269	0.0459368	0	0.591966	0.133686	2.65863	0.368418	0	0	0.625022	Low
TCGA.CW.6088	0	8.8274	0	0	0	0	0	0	1.54943	0	1.47156	0.127969	0	1.22731	0	0	0	0	0	0	0	0	0.387319	0.198161	0	0	0	0	0	0.478501	Low
TCGA.BP.4352	1	0.942466	0	2.11884	1.32328	0.861626	0	0.430652	1.57888	0	4.8232	1.72705	0.690485	2.28233	3.63704	0	0.458229	0	0	1.11548	0.477871	0	0.238554	0	0.121929	0	0.952963	2.94295	1.13881	3.15737	High
TCGA.MM.A563	0	1.61918	0.813402	1.65805	0	0.329103	1.66437	0	2.90597	0	2.73084	0.18485	0.697388	1.47285	0	0.362459	0	0	0	0.124711	0.167533	0	0.557267	0.118642	1.51555	2.78119	2.20642	0.536458	0	0.744886	Low
TCGA.B8.A8YJ	0	1.18082	1.30422	0.642174	0	1.58925	3.04495	0	2.41699	0.350688	0.0912055	0	0	2.99076	0	0.264074	0.787902	0	0	0	0	0.0269914	1.56665	1.4692	1.56151	1.19141	2.70786	0	0	0.466943	Low
TCGA.CZ.5984	0	5.66301	0.205009	0.431999	0	0	1.29486	0.0895153	2.07467	0	2.17122	1.33939	0.869574	1.26064	0	0.196118	0	0	0.493932	0.688492	1.20915	0	0.55338	0.0805348	1.9395	2.29776	6.16449	0.744899	0	0.728766	Low
TCGA.CJ.4871	0	6.63836	0.031752	0	0.217427	0	0	0	2.15145	0	2.08308	0.814333	0.280486	1.70255	0	0	0	0	0.241093	0.703075	0.254132	0	0.689319	0.397056	2.7086	0.0993477	6.7085	1.28224	0	0.783759	Low
TCGA.BP.5192	0	1.95616	0	0	0	0	0	0	1.12916	0	2.26062	0.981768	0	0.6932	0	0	0	0	0	0.0207826	0.926905	0	0.564457	0	0.622453	0	0	0	0	0.848098	High
TCGA.B2.5636	0	2.51781	0	0	0	0	0.733648	0	1.16259	0	1.8968	0	0	1.68195	0	0.693684	0	0	0	0	0	0	0.653852	0.142653	0	0	1.9229	1.28962	0	0.565415	Low
TCGA.A3.3358	0	3.58082	0.155257	0.913496	0.232897	0.0934632	1.92214	0	2.67173	0.273316	2.48577	0.783413	0.978952	1.11111	0	0.664907	0	0	0	0.16078	0.940318	0	0.190553	0.206813	1.60873	2.32283	3.12348	2.05339	0	0.854348	High
TCGA.CZ.5460	0	7.87123	0	0.198201	0	0	1.01542	0	2.87254	0	2.81441	1.20521	1.05002	1.10032	1.88464	0	0	0	0	0.429108	0.410613	0	0.519371	0	0.666374	1.51856	2.60921	3.4976	0	1.45281	High
TCGA.A3.3326	0	3.11507	0.810001	0.723153	0	0	0.932151	0	1.88893	0	1.89748	0.601394	0	0.666091	0	0.539398	0	0	0.103207	0	0	0	0.068315	0	0	3.16724	0.0545682	0	0	0.529587	Low
TCGA.CJ.4907	0	4.10685	1.09481	0	0	0.651941	0	0	2.62119	0	3.07737	0.318836	0.52598	1.84402	0	0.343502	0	0	0	0.297666	0	0	1.48124	0.570968	2.40106	0.175936	1.86186	0	0	1.15195	High
TCGA.AK.3461	0	6.07397	0.168764	0.125291	0	0.269513	0	0	1.8343	0.292197	1.57243	0	0	1.61432	0	0	0.120487	0	0	0	0	0	0	0.379461	0	0	0.0165641	0.559305	0	0.463528	Low
TCGA.B0.5703	0	6.15342	0	0	0	0	0	0	1.50588	0	0.34551	0.203616	0.63633	0.758106	0	0	0.175903	0.0187222	0	0.153197	0	0	0	0	0	0.262729	0	2.02617	0	0.367964	Low
TCGA.B0.4834	1	5.72603	0	0	0	0	0	0	0	0	0	0	0	0.206306	0.271503	0	0	0	0	0	0.428594	0.200026	0.556101	0.789597	0	0	0	0	0	0.733867	Low
TCGA.AK.3444	0	4.03014	0	0	0	0	0	0	1.17086	0.0771125	1.20696	0.584962	0	0.617314	0	0	0	0	0	0.25382	0.245093	0	0	0	1.05719	0.425041	0	0	0	0.501806	Low
TCGA.CJ.5677	1	2.14247	0	0.39778	0.913085	0.887484	0	0	1.72409	0.820953	1.25399	1.80747	0.878032	1.76522	0.324953	0.65188	0	0	0	1.76093	1.20546	0	0.681157	0.52557	2.08807	0.510863	4.04646	1.31315	0.426722	1.68403	High
TCGA.CJ.4644	1	0.920548	0	1.37468	0.311317	0.111739	0	0	1.83946	0.261248	1.03137	0.631342	0.697096	0.935237	0	0.304225	0	0.0425319	0	0.55355	0.217004	0	0.0278929	0.224019	0.553462	1.72267	0.0501943	0.289227	0	0.609198	Low
TCGA.CJ.4890	0	9.6411	2.03806	2.55796	0	2.05528	3.33654	0	3.33703	0.443339	0	0.282277	0.853337	1.76026	0	1.37723	0.610864	0	0.23604	0.312444	0.724257	0.337599	0.827298	1.52821	2.42487	3.94926	4.06998	0.319754	0	1.76832	High
TCGA.B0.5115	0	4.39452	0.502743	0	0	0	0	0	2.3956	0	2.51288	0.658081	0.323168	1.5089	0	0.0578726	0	0.0108504	0	0	0	0	0.775022	0.0964775	1.41546	1.61138	0.567673	0.454599	0	0.659447	Low
TCGA.B2.5641	0	1.79726	0	2.05216	0	0.385583	0.623174	0	1.51483	0	1.41608	0.676652	0.711097	1.09527	0	0.846318	0	0	0.396373	0.698798	0.899691	0	0	0.129529	0	2.47688	5.98497	1.99379	0	0.74059	Low
TCGA.B0.5083	1	2.86301	0	0	0	2.17213	0	0	1.6093	0	0	0.222187	1.55005	0.220201	1.66452	0.204868	0	0	0	0	0.39827	0	0.906005	0.377905	0	2.29241	0.68499	0	0	1.1868	High
TCGA.CJ.4894	1	2.30411	0.291492	1.99344	0	0	1.14931	0	1.36913	0	0.412852	0	0	0.878493	0	0.464636	0	0	0.566228	0	0.129044	0	0.747037	0.123502	0.533737	3.02466	0.0447513	0	0	0.771312	Low
TCGA.B0.5099	1	1.32877	0	0	0	0	0	0	1.71378	0	0.684842	0.0903401	0	0.949812	0.42544	0	0	0	0	0.359693	0	0	0.443094	0	0.54977	0	0	2.40669	0	0.640506	Low
TCGA.B4.5843	0	0.030137	0	0	0.24934	0.262027	0	0	1.9073	0	1.27129	0.461088	0.376544	1.26929	0	0	0	0	0.367707	0	0.238581	0	0	0.276319	1.84913	0	0.492539	0	0	0.579975	Low
TCGA.B8.A54D	0	2.27397	0	1.1993	0	0	0	0	2.50951	0	1.02291	0.0166379	0.758542	0.341851	0	0.150231	0	0	0.251393	0	0.580119	0.0501145	0	0.0550653	0	1.4481	0	0	0	0.62693	Low
TCGA.AK.3427	0	9.81644	0	0	0	0	0	0	0	0	0	0.112801	0.351946	0	1.63391	0	0.238707	0	0	0	1.71184	0	0	0	0	0	0	3.39483	0	0.586232	Low
TCGA.B0.5699	0	10.5233	0	0	0	0	0	0	1.75159	0	1.26876	0.768245	0.471144	0.716519	0	0	0	0	0.755614	0.137447	0	0	0	0	1.2011	0.667732	0	0.708733	0	0.803391	Low
TCGA.A3.3320	0	4.13151	0	0	0	0	0	0	1.44203	0	2.30814	0	0	0.780551	0	0	0	0	0	0	0.107856	0	0	0	1.18449	0.789612	0	0	0	0.460036	Low
TCGA.BP.4973	0	3.79178	0	0.189646	0	0.177454	0	0	2.69302	0.0414922	2.44622	0.508634	0.487673	1.18194	0	0	0	0	0	0.232917	0	0	0.206877	0	0	0.824893	2.69629	0.0810782	0	0.600938	Low
TCGA.BP.4344	0	4.56438	0.169444	0	0	0	0	0	1.87318	0.0559933	2.11311	0.157528	0	1.47907	0	0.7106	0	0	0	0	0	0	1.23473	0.277486	0.685031	0.163204	0.854211	0	0	0.829244	High
TCGA.B8.A54G	0	0.145205	0.208702	3.40838	0	0	0	0	2.99218	0.4157	2.12788	0.442225	0.595398	0	0	1.03308	0	0	1.12661	0.177599	0.733393	0	0	0	0	3.52181	0.899213	0	0	2.64066	High
TCGA.BP.5184	0	3.10411	0	0	0	0	0.80584	0	1.41093	0	1.60722	0.917983	0.0459782	0.913084	0	0	0	0	0	0.233306	0.134292	0	0.389748	0	0.797749	0.631188	0	0	0	0.604663	Low
TCGA.CJ.4868	1	1.76986	1.26758	1.5239	0.23173	2.8077	0.264936	0	2.51758	0	2.40959	1.09796	0.654998	3.21375	2.02886	0.793139	0	0	0.324855	1.28805	0.216907	0	0.62441	0.827121	3.34332	2.62452	5.3042	1.64419	0.68355	2.20692	High
TCGA.BP.5199	0	3.71233	1.29217	1.53177	0	1.16279	0.52708	0	2.71265	0	2.86912	1.33112	0.215636	2.01095	1.18444	0.711475	0	0	0	0.385067	0.15344	0	1.76604	0.576898	0.436858	2.47397	3.91816	1.74102	0	3.11722	High
TCGA.BP.4803	0	0.558904	0.347852	0	0.00853555	0.190674	0	0	1.69386	0	2.94327	1.01949	0.43274	1.81779	0	0.0258876	0	0	0	0.490746	0.187846	0	0.637431	0.231019	0	0.857259	4.75095	1.33853	0	0.684275	Low
TCGA.BP.4326	1	4.45205	0.590004	0	0.616044	0.332311	0	0	3.64125	0.0805188	2.59684	0.886966	0.633025	3.50768	0.922725	0	0	0	0	0.964112	0	0	2.26209	0.497573	1.55888	0	5.89506	3.75766	0	1.84791	High
TCGA.BP.4345	0	4.15342	2.30781	0	0	1.95389	0	0	2.99228	0.623679	1.0783	0.47188	0	2.68644	0	0.822985	0	0	0	0.429303	0	0	2.88095	1.76133	2.48968	2.09958	5.28485	0.430294	0	2.7392	High
TCGA.BP.5177	0	0.80274	0.862085	0	0	0	0	0	2.52526	0	1.72704	1.12616	0	1.87385	0	0	0	0	0	0	0.123115	0	1.73573	0.649223	1.12628	0	1.18692	0	0	1.1481	High
TCGA.B0.4688	1	0.276712	3.11161	4.97303	0	4.82813	0	0.88265	0	0.406162	0.36339	0.854393	1.15347	1.9234	1.72322	0.509454	1.8614	0	1.90622	0	0	0.990391	0	1.20654	2.49872	0	2.97428	1.12775	2.37844	56.9971	High
TCGA.CJ.5671	0	10.9233	1.37603	0.978629	0	1.67937	2.39921	0	3.85381	0	2.18074	0.945208	0.290403	2.8901	0.371504	0.839415	0	0	0	0.762282	0.375235	0	1.52215	1.08308	3.13839	2.53345	4.65696	2.09743	0	1.45197	High
TCGA.CJ.4873	0	4.86575	0.591656	1.39616	0	0.554925	1.55817	0	2.06835	0	3.19689	2.21895	0.365266	1.41863	1.89786	0.348849	0	0	0	0.835587	1.49704	0	0.387222	0	1.0671	2.6184	2.32811	0.642526	0	1.66829	High
TCGA.A3.3380	0	1.55342	0.0508948	0	0	0.140611	0.030774	0	2.45518	0	2.00729	0.103078	0.187927	1.6461	0	0	0	0	0	0	0.429275	0	0.917665	0.235296	0.183826	0.167091	0.82476	0	0	0.609422	Low
TCGA.B8.5163	0	2.25205	1.60399	1.93978	0.382245	1.3436	1.59519	0	2.68884	0.530346	2.01078	1.25713	0.434004	2.64913	0.0476905	1.3853	0	0	0.204168	0.491815	0.372416	0.0453539	1.40749	1.50926	3.75552	2.61519	6.46269	2.09471	0	3.14776	High
TCGA.A3.3385	0	5.46027	0	0	0.0979494	0	0	0	0	0.0500566	0	0.738395	0	0	0	0	0	0	0.402786	0.0309908	0	0	0	0	2.3552	0	0	0	0	0.727468	Low
TCGA.BP.4334	1	1.76712	0	0	0	2.97675	0	0	0	0	0	0.0784777	1.0718	0	1.52487	0	0	0.0865557	0	0	0.525593	0	1.08499	0	0	0	0	1.63719	0	3.13857	High
TCGA.CJ.4901	0	3.9726	1.18635	2.48524	0	0.8207	3.17884	0	2.98431	0.24918	2.66632	1.11605	1.37602	1.70828	1.26734	1.16733	0	0	0.332726	0.737977	0.674688	0	1.33636	0.403958	2.18709	3.95354	4.53313	3.15412	0	3.33276	High
TCGA.B2.4101	0	1.77534	1.7341	1.09266	0	0	2.03582	0	2.45528	0	2.11515	0.177947	0.743959	1.81332	0	0.312003	0	0	0	0	0.128558	0	1.27	0.217409	2.01578	2.33945	2.00872	0.904243	0	0.775297	Low
TCGA.MW.A4EC	0	1.36438	0	0	0	0	0	0	0.620444	0	2.80139	1.05829	0.53298	0.37207	0	0	0	0	0	0.282111	0.740974	0	0.551631	0	1.37164	0	0	0.845036	0	0.979941	High
TCGA.B0.5107	1	2.53973	0	2.02688	0.240778	0	0	1.21601	0.319141	1.40762	3.26754	2.28361	0.676873	0.443972	1.19182	0	0	0.241368	1.22514	1.09332	1.14209	0	0	0	0	1.71635	0.473975	0.645637	0.499699	8.27155	High
TCGA.GK.A6C7	0	0.167123	0.396049	0	0	0	0	0	2.47997	0.0578425	0	0	0	1.67631	0	0.140023	0	0	0	0	0	0	1.55227	0	0	0.511252	0	0	0	0.627065	Low
TCGA.BP.5174	0	6.18356	0	0	0.779888	0	0	0	1.00611	0.517013	1.16799	1.39773	0.616107	0.826024	0	0	0	0	0	0.993959	1.02594	0	0	0	2.03648	0	0	0	0	0.749332	Low
TCGA.BP.4991	0	3.87123	1.37418	0	0	0.901191	0	0	1.88154	0	1.60275	0	0.247915	1.92486	0	0.599771	0	0	0	0	0	0	0.708364	0.40668	0	0.638283	1.37091	0.175674	0	0.592839	Low
TCGA.A3.A6NN	0	0.00821918	0.316077	0	0	0	0	0	2.33456	0	2.19143	0	0	1.69895	0.646337	0	0	0	0	0	0	0	0.523938	0.314815	0.79085	0.531759	2.12371	0.387517	0	0.575886	Low
TCGA.A3.3308	0	0.0438356	0.756167	0	0.86181	0.88379	0	0	1.59336	0.171516	1.01076	0.585934	0	1.96013	0	0.372959	0	0.0453502	0	0.518162	0	0	1.92676	0.601979	0.942921	0.900607	4.64141	2.18376	0	1.64927	High
TCGA.BP.4987	0	3.07945	0	0	0	0	0	0	1.55001	0	2.67429	0.305613	0.115689	0.820971	0	0.149064	0	0	0	0	0	0	0.371578	0.0556486	1.38475	0.816924	0	0.358642	0	0.65431	Low
TCGA.CJ.6031	0	5.22192	0.944098	1.17519	0	1.35108	1.60014	0	2.32727	0	0.875595	0.936943	1.01288	2.23375	0	0.85915	0	0	0	0.410539	0.356477	0	1.72698	0.789694	1.66169	1.96526	4.32736	1.61434	0	1.2467	High
TCGA.AK.3456	0	3.13151	0	0	0	0.143527	0	0	0.820081	0.143195	1.37799	0.468866	0.325015	0	0	0	0	0	0	0	0.0753933	0	0	0	2.50736	1.17061	0	0	0	0.620176	Low
TCGA.B8.5546	0	1.38356	0	0	0	1.0158	0	0	0	0	0.949642	0	0	0	0	0	0	0	0	0	0.110869	0	0	0	3.23313	0	0	0	0	0.728182	Low
TCGA.BP.4999	0	3.46849	0.725072	0	0	0.10542	0	0	2.11384	0.153316	1.83383	0	0	1.42485	0	0.210117	0	0	0	0	0	0	0.93156	0.651265	0.905705	0	0.228163	0	0	0.74001	Low
TCGA.BP.4176	0	5.35616	0.483601	1.25491	0	0.817103	1.26406	0	3.40098	0.130446	3.04122	1.06198	1.09873	1.41572	0.661789	0.710503	0	0	0	0.915599	0.848858	0	0.392469	0.848702	1.65547	2.47922	3.85537	1.74889	0	1.0982	High
TCGA.CJ.4640	0	9.53425	0	2.34632	0	0	0	0	2.17157	0.21755	0.103741	0.133025	0.954549	1.31	0	0.807916	0	0	0	0.330818	1.10836	0	0.539874	0.513321	1.95806	2.97198	1.6418	0.883146	0	0.473399	Low
TCGA.B0.4847	1	2.1726	0	2.06528	0.110014	0	0.697989	0	2.74171	0	0.0357191	0.746951	0.189288	0.257901	0	0.00362446	0	0.00511657	0.321551	0.150766	0.674882	0	0	0	0.0322406	2.69139	0	0	0	0.705574	Low
TCGA.B0.5710	0	6.65753	1.42879	0	0	0.307133	0	0	3.2547	0	1.43814	0	0.304306	2.84977	0	0.488649	0	0	0	0	0	0	1.44111	0.602173	0.270502	0.397925	2.49996	0.0710645	0	0.558785	Low
TCGA.B0.4839	1	4.49041	0	0.302803	0	0	0	0	1.7131	0	1.74462	1.19792	0.299833	1.73986	0	0.186201	0	0	0	0.509704	0.665649	0	0.618289	0	1.33588	0.496964	4.97616	0	0	0.591914	Low
TCGA.CZ.5470	0	1.05753	0	1.18044	0.16051	0	1.20149	0	1.70854	0.128304	0.283222	1.6904	1.22727	0.614496	1.1891	0.449665	0	0	0.100973	0.595744	1.24142	0	0.233501	0	0.943601	2.22117	1.21977	0	0	0.788938	Low
TCGA.BP.5186	0	1.89863	0	0	0	0	0.17302	0	0	0	1.5873	0.57378	0	0.524035	0	0	0	0	0	0.0693928	0	0	0	0	1.80531	0.809731	0	0	0	0.476314	Low
TCGA.A3.3349	0	3.79452	0.640241	0	0	0.0297899	0	0	2.00964	0	1.5289	0.0875204	0	1.99929	0	0.592479	0	0	0	0	0	0	1.71153	0.757226	1.13172	0.0750495	2.58724	0.270561	0	0.782577	Low
TCGA.AS.3777	0	3.39178	0	0	0	0.0131667	0	0	0	0.339204	0	0.0720604	1.64125	0.369252	0	0	0	0	0.141104	1.41609	1.08173	0.341486	0	0	0	0	0.282788	0.867688	1.27261	0.755684	Low
TCGA.A3.3363	0	0.873973	0	0	0	0	0	0	0.416627	0	0	0	0.0969242	0	0	0.45715	0	0	0	0	0.665066	0	0	1.11691	2.94473	0.883695	0.0365867	0	0	0.321414	Low
TCGA.CZ.4862	0	8.96164	0.491374	2.18456	0	0.438077	0.205472	0	1.15667	0.103682	1.14875	0	0.461616	0.937181	0	0.751529	0	0	0	0	0.0336001	0	0	1.02699	0.111629	2.94876	3.92856	0.0101073	0	0.470426	Low
TCGA.BP.5202	0	0.0794521	0	0	0	0	0	0	0.378333	0	2.30143	0.850407	0.363127	0.767336	0	0.0230682	0	0	0	0.0484904	0.316141	0	0	0	0.870626	0.283042	0	0.255492	0	0.555328	Low
TCGA.BP.4963	0	5.02466	0.206078	0	0	0.319771	0	0	2.03802	0	3.49687	0.990713	1.15794	1.44768	0.391426	0.41136	0	0	0.29891	0.499885	0.758371	0	0.789208	0.37567	0	1.06117	3.54104	0	0	0.908987	High
TCGA.B0.4707	1	1.64384	0.186158	0.408279	0.635503	0	1.80409	0.787528	2.26536	0.134922	2.52085	1.69769	0.63983	1.04756	3.597	0	0	0	0.779615	1.65097	1.8655	0	0.652103	0	1.38106	0.692419	3.10734	3.63118	0.570052	3.42968	High
TCGA.B0.4817	1	2.79178	0	3.00028	0.68415	0.530816	0.201877	0	2.72276	0	3.10263	1.67319	1.99729	0.391114	0.799886	0.570216	0	0	0	0.447386	1.33434	0	0.931852	0	1.85117	0.323378	3.2892	1.61483	0	4.69213	High
TCGA.CJ.4636	0	5.27123	0.0624582	1.59448	0.310149	0.897205	0	0	1.44465	0	2.45827	0.749965	0.709638	1.51045	0.265575	0.81686	0	0	0.0990291	0.120239	1.22937	0	1.16826	0.534805	0	1.74084	1.64705	1.01002	0	1.40551	High
TCGA.CJ.4870	0	4.10411	0	0	0	0.221004	0	0	2.17798	0	2.13857	1.20258	0	1.60626	0	0	0	0	0	0.302333	0.00327576	0	0.195897	0.349714	0	0	0	0.01351	0	0.602362	Low
TCGA.CJ.4908	0	4.19452	1.74547	0	0	0.84928	0	0	2.4927	0	2.13604	0.161612	0	2.25163	0	0.353223	0	0	0	0	0	0	1.74865	0.465688	0.75033	0.664622	2.94376	0.51507	0	1.15542	High
TCGA.BP.4960	0	5.95068	0.817386	0.050923	0	0	1.98345	0	2.89265	0	3.27317	1.72842	0.381114	2.6364	0	0.263879	0	0	0	0.891586	0.628424	0	1.62631	0.17726	2.44449	1.51341	6.42362	1.60219	0	1.0818	High
TCGA.B0.4837	1	3.77534	1.29294	0	0.0489129	0.490668	0	0	2.56297	0.28081	2.40055	1.5532	1.58078	2.57004	2.64364	0	0	0.0320362	0.1275	0.801754	0.362891	0	1.75263	0.395015	2.90518	0	3.48408	3.02831	0	3.57093	High
TCGA.CJ.4881	0	5.51781	0.624111	1.24791	0.436827	0.0931716	2.60694	0	2.27528	0	2.71947	1.4937	0.611343	1.97296	2.19271	0.546106	0	0	0	1.95391	1.62738	0	1.88556	0.314232	3.83277	1.85922	3.97201	1.82434	0	2.09139	High
TCGA.B0.4811	1	3.88219	0.266713	0	0	0	0	0.123036	1.50569	0	2.56847	1.41601	0	1.28299	0	0	0	0	0.375675	0	0.245482	0	1.88041	0	0.675897	0.505712	0.206974	1.76328	0	2.32018	High
TCGA.CW.5591	0	6.22192	0	0	0.123343	0	0	0	0	0	0	0	0	0	0	0	0	0	0	0	0.362503	0	0	0	1.81979	0	0	0	0	0.429563	Low
TCGA.BP.5008	0	2.93425	0.750531	0.564987	0	0.598573	0.712758	0	2.51642	0	1.77397	0.326518	0.124828	1.22304	0	0.475914	0	0	0	0	0.138666	0	1.02057	0.37635	0	1.64977	1.20315	0	0	0.877233	High
TCGA.A3.3359	0	6.86027	0	0.739582	0	0	0	0	1.62689	0	1.29578	0.167251	0.11423	0.905505	0	0.158202	0	0	0	0	0.176669	0	0	0.0658558	0	1.1951	0.0409606	0	0	0.428147	Low
TCGA.BP.4164	1	2.71781	0	0	0	0	0	0	1.64293	0	2.71248	0.410235	0.475714	0	0	0	0	0.362652	0	0.296208	0.20398	0	0	0	0	0.325613	0.590903	1.2382	0	1.21244	High
TCGA.DV.5567	0	5.49041	0	0	0	0.16365	0	0	1.26173	0	1.69662	0.551222	0	1.3787	0	0	0	0	0	0	0	0	0.901146	0.311413	0	0	3.19744	0	0	0.722149	Low
TCGA.AS.3778	0	0.117808	0	0	0	0	0	0	1.78775	0	2.1718	0.613743	0.0917713	1.29893	0	0	0	0	0	0.0469349	0	0	0.462236	0.0952137	0	0	1.7737	0.155063	0	0.649899	Low
TCGA.AK.3434	0	5.71781	0	0.425388	0	0.131667	0	0	2.43234	0	2.01312	0.742576	0.949007	1.47295	0	0	0	0	0	0.14085	0.00337296	0	0	0.348548	1.07109	0.511835	1.82006	0.728566	0	0.49832	Low
TCGA.CJ.4643	0	4.91233	0.0535184	0	0	0	0	0	2.05348	0	1.72461	0.0526139	0	1.02696	0	0.3086	0	0	0	0	0	0	0.397813	0.276514	0.379916	1.19364	1.49251	0	0	0.46319	Low
TCGA.BP.5182	0	3.19178	0.744701	0	0.0312052	1.16249	0.761728	0	2.30055	0	1.44572	0.757355	0.300125	1.11091	0	0.863525	0	0	0	0.597688	0.343647	0	0.407142	0.819344	1.5618	2.36647	2.39119	0.460918	0	0.589826	Low
TCGA.A3.3331	0	3.44384	0	0	0	0.258722	0	0	1.6751	0	0.95246	0	0.440713	0.908128	0	0.210603	0	0	0.141007	0.087573	0	0	0.00466959	0	0.736046	0.682214	1.12267	0	0	0.414801	Low
TCGA.BP.4351	0	2.65753	0.246793	0.388059	0	0	0	0	2.6207	0	2.4057	1.12003	0.100619	1.86355	0.343515	0	0	0	0	0	0	0	1.5034	0	0.587083	0	3.16517	0.403364	0	1.51141	High
TCGA.BP.4167	0	7.44658	0.791052	2.16065	0	1.24065	1.69216	0	2.31804	0	1.78359	1.715	1.317	2.12988	0.787835	0.755515	0	0	0	0.764032	0.726978	0	0.369732	0.9952	1.95097	2.56095	4.78779	0.344059	0	0.925118	High
TCGA.BP.4174	0	5.14795	0	0.61233	0.449183	0.149457	0	0	1.98146	0.186114	0.628384	0.99081	0.821739	0.755191	0	0.13312	0	0	0	0.584466	0.779365	0	0.0109855	0	1.17584	1.89266	1.88139	0.587013	0	0.512961	Low
TCGA.B0.5400	0	4.74795	0.0590572	0.273444	0.937214	0.215172	0.252207	0	2.00187	0	2.84046	1.64003	1.16747	1.944	0.0804412	0.417194	0.0131565	0	0	1.97909	1.10642	0	0.298701	0.356616	2.95046	1.23573	4.31327	3.2386	0	0.592607	Low
TCGA.B0.5116	0	3.49041	0.166724	0	0.616141	0	0	0	2.2708	0	3.03024	2.37608	0.898061	2.49483	0	0	0	0	0.223311	1.06376	1.04519	0	1.26378	0.169386	0	0	5.40577	3.28478	0	1.46834	High
TCGA.BP.4790	1	3.04384	1.46581	0.554779	0	1.10232	0.892606	0	2.03336	0.350882	1.56854	0	0.0128243	1.32351	0	0.444609	0	0	0	0	0	0	0.722939	0.935706	0.782493	2.88364	2.86483	1.0491	0	0.899394	High
TCGA.B0.5120	0	3.20274	0.311801	0	0.0423941	0.0041261	0	0.286074	1.59919	0	2.56273	0.574752	0.116467	1.36869	0	0.299073	0	0	0	0	0.314198	0	0	0.424664	0.130188	0.436899	4.20616	0.607332	0	0.452733	Low
TCGA.CZ.5988	0	1.89863	1.36271	0.444442	0.582769	1.06917	0	0	2.13337	0	2.32524	0.876173	1.21054	2.67556	0	0	0	0	0.319705	0.429303	0.165492	0	0	0.774238	1.18488	0.496673	5.51716	1.54677	0	0.657898	Low
TCGA.B8.4620	0	2.12877	0.675223	0.109834	0.51836	0.777733	0	0	4.14189	0	2.90974	0.971947	1.75889	2.98406	1.91992	0.50644	0	0.414353	0	0.835781	0.204563	0	1.55383	0.710758	0	0	5.11369	2.33679	0	2.99961	High
TCGA.B0.4690	1	0.117808	0.97976	2.28605	0.884188	3.00824	0.262701	0.0894182	2.31085	0.564896	2.77642	1.24332	1.25692	1.76464	2.88047	1.46531	1.21178	0.0610938	0.656791	0.897905	0.63824	0	0.666096	1.20994	3.66768	2.7221	4.49503	3.02919	0.830767	5.18989	High
TCGA.T7.A92I	0	0.975342	0	0	0	0	0	0	1.07123	0	0	0	0	0	0	0	0	0	0	0	0.241983	0	0	0	1.51525	0	0	0	0	0.460382	Low
TCGA.A3.3376	1	4.64658	1.41703	0	0	1.17776	0	0	2.0009	0	1.98552	0	0	2.07071	0	1.24958	0	0	0	0	0	0	1.23793	0.476867	1.08916	0	0.788019	0	0	1.02098	High
TCGA.B0.4833	1	6.53699	0	0.321273	0	0	0	0	1.80855	0	0.851205	0.25865	0	0.584472	0	0	0	0	0	0	0.555723	0	0.193857	0	0.446284	1.26955	1.47209	0	0	0.462636	Low
TCGA.BP.4340	1	1.53973	0	0	0	0	0	0	1.79863	0	0.715549	0	0.496423	0.236816	0	0	0	0	0	0	0.349187	0	0	0	2.17932	0.113441	0	0.0640646	0	0.465555	Low
TCGA.6D.AA2E	0	0.991781	0	0	0	0	1.16748	0	1.22606	0	0	0	0	0	0	0	0	0	0	0	0.594309	0	0	0	2.00703	0.728867	0	0	0	0.411736	Low
TCGA.BP.5178	1	5.23836	0.466596	1.07108	0.335349	0.754499	3.65154	0	3.25402	0	1.5805	2.16917	2.19777	3.06597	4.24482	0.309378	0.723445	0	0	1.25995	1.80466	0	0.15256	0.905376	2.28669	0.82431	5.481	1.89609	0	0.661426	Low
TCGA.A3.A8CQ	0	0.00821918	0	0	0	0	0	0	1.05986	0	1.15497	0	0	1.42378	0	0	0	0	0	0	0	0	0.531906	0	1.04417	0.0353947	0	0	0	0.446071	Low
TCGA.CZ.5456	0	6.63562	0	0	0.377769	0	2.7726	0	2.65511	0.401101	2.48052	1.63274	1.35026	1.44127	1.07394	0.363529	0	0	0	1.44477	1.38838	0	0.0333343	0.360019	1.67957	1.96438	6.27967	2.97056	0	0.80834	Low
TCGA.AK.3436	0	9.12603	0	0.561001	0.029162	0	0	0.71077	1.79446	0	3.11799	2.40535	1.68802	1.51065	3.33743	0	0	0	0.0930045	1.02993	1.45418	0	0.75209	0	0.698246	0	6.0531	1.34446	0	1.88979	High
TCGA.BP.4961	0	5.30137	0.37953	0	0	0.898858	0	0	1.80213	0	1.62782	0.0787694	0	1.879	0	0.262518	0	0	0	0	0	0	0.71332	0.490768	0	0	3.82903	0	0	0.651161	Low
TCGA.A3.3325	1	3.20548	0.534519	0	0	0	0	0	2.27703	0	2.8459	0.790803	0.282236	1.20127	0	0.199618	0	0	0.800507	0.863683	0.696751	0	0.529574	0	0	0.220061	1.17584	0.76794	0	1.122	High
TCGA.CZ.5987	1	1.21918	0	0.416834	0	0	0	0	2.69603	0	2.86689	1.45811	0.763404	0.743434	0.204544	0	0	0	0.621907	1.07135	0.86091	0	0	0.198841	0.596703	1.23145	4.75192	1.3428	0	1.01631	High
TCGA.BP.4801	0	3.07945	0	0	0.00513023	1.26816	0	0	1.79475	0	2.27782	0.713017	0.743181	1.18466	0	0.405819	0	0	0	0.112267	0.293593	0	0.224076	0.456161	1.07711	1.73618	1.69827	1.22167	0	0.704085	Low
TCGA.B0.5812	0	10.5041	0.24242	0	0	0.107753	0	0	2.00906	0.0902511	2.22787	0.310474	0	1.99424	0	0.490205	0	0	0	0	0	0	0.738972	0.413193	0.696303	1.03736	1.79275	0.570097	0	0.562014	Low
TCGA.B8.5159	0	1.97808	0	0.0829061	0	0	0	0	1.86152	0	0	0	0.869088	0.326985	0	0	0	0	0.171713	0.0572403	0.450851	0	0	0	0	0.397827	1.39016	0	0	0.391103	Low
TCGA.DV.5576	1	1.99178	0	0	0	0.740112	0	0	1.29643	0	1.11367	0.703974	0	1.36529	0	0	0	0	0	0	0	0	1.36357	0	0	0	3.0707	0	0	1.1208	High
TCGA.CZ.5452	0	4.90137	0	1.7121	0.07635	0	2.94614	0	2.70857	0.699105	2.28588	1.32276	0.169065	0.500133	0	0.31035	0	0.0324249	0.000206144	1.30215	0.786169	0	0.0552944	0	0.630713	3.07452	1.95682	0.0787449	0	1.20906	High
TCGA.BP.5170	0	6.60822	0	0	0	0.113878	0.851797	0	2.14348	0	2.64426	1.33297	0.198136	2.11666	0	0.294309	0	0	0	0.275889	0.450365	0	0.600701	0.151694	0.116973	0.130741	5.90517	1.01284	0	0.760624	Low
TCGA.BP.5194	0	1.11781	0.789011	0	0	0.621806	0.504053	0	2.02315	0	1.95112	0.461671	0.099841	1.13248	0	0.238311	0	0	0.138383	0	0	0	0.463791	0.452272	0	1.09587	0	0	0	0.719752	Low
TCGA.B8.A54E	0	2.49041	0	0	0.554943	0	0	0	0.680899	0.139399	0	0.678013	1.24438	0	0	0	0	0	0	0	1.12771	0	0.435418	0	2.21925	0	0	0	0	0.653475	Low
TCGA.BP.4173	0	5.1863	1.03048	3.07698	0	0.580588	0.650574	0	3.47096	0.414629	1.42492	0.351604	0.530841	1.19447	0	1.67239	0	0	0.365958	0	0.347632	0	0.336111	0.698024	0	4.18408	1.65589	0	0	1.30462	High
TCGA.CZ.4865	1	0.454795	0.304902	0	0	1.77386	0.785047	0	1.07084	0.113511	1.0164	0.74559	0.752417	1.66844	0	0.556022	0	0	0	0.272875	0.500031	0	0.322799	0.740311	0.213949	1.98207	5.23441	0.815384	0	0.565919	Low
TCGA.BP.4768	0	1.09589	0	0	0.456675	0	0	0	1.45884	0	3.13664	1.1914	0	0.1928	0	0	0	0	0	0.920168	0.528606	0	0.115733	0	0.901527	0.620885	1.40551	1.44479	0	0.959584	High
TCGA.B0.5096	1	0.186301	0.0533241	0.626814	0.825422	1.89488	2.05914	0	1.12119	0.068548	3.83552	1.16884	0.592773	1.74219	2.18562	1.06166	0	0	0	1.11393	0.267156	0	0.564652	0.718244	3.28405	1.65696	3.11813	0.590221	0	2.30951	High
TCGA.B8.A54K	0	1.28493	0	0	0	0	0	0.276261	2.399	0	2.581	0.507662	0	0.63665	0	0	0	0	0	0	0	0	0.781046	0	0	0	2.28972	0	0	0.956372	High
TCGA.BP.4766	0	4.00548	0	0	0	0.528775	0	0	1.2075	0	0.899986	0	0.75932	1.00267	0	0.0326929	0	0.140006	0.066574	0	0	0	0.424923	0.0415529	1.32577	0.092933	0	0.529653	0	0.665504	Low
TCGA.B0.4945	1	5.87671	0	0	0	0	0	0	1.46205	0.49823	0.980155	0	0.780126	1.238	0	0.104052	0	0	0	0	0.11602	0	0.692817	0.217214	0.801636	0	0.0812975	0	0	0.670598	Low
TCGA.B0.4694	1	0.290411	0.250291	1.80057	0	1.45773	1.64231	0	2.51612	0	1.99086	1.22008	0.919548	1.24743	1.86414	0.79625	0	0.0573037	0	0.967904	0.883751	0	0.446592	0.675276	2.82249	3.17832	3.19501	2.7733	0	1.8747	High
TCGA.BP.5185	0	3.10137	0	0	0	0	0	0	1.72807	0	1.84219	1.36059	0.14894	0.783757	0	0	0	0.116196	0	1.16652	0.997953	0	0.478658	0	1.53692	0	0	2.31705	0	0.968621	High
TCGA.CJ.4895	1	3.28767	0.545791	1.28232	0.703123	0.290024	0	0	2.48638	0	2.60277	0.935291	0.861018	2.17681	1.81496	0.5603	0	0	0.630749	1.39995	0.241302	0	0.965569	0.529556	2.10897	0.819062	2.43697	1.64292	0	1.97211	High
TCGA.B2.5635	0	2.06849	0	1.16975	0	0	0	0	2.07214	0	2.02274	0.430848	0.0855489	1.12082	0	0.546786	0	0	0	0.216196	0.373097	0	0	0.0695498	1.73661	1.32592	2.88291	0.170813	0	0.563395	Low
TCGA.B0.5700	0	4.90411	0	0	0	0	0	0	1.19583	0	2.15499	1.15173	0	1.49141	0	0	0	0	0	0.615577	0.833405	0	1.00249	0	0.362134	0	0	2.29576	0	0.916048	High
TCGA.A3.3324	0	3.24932	0.366314	0.695544	0.168196	0.381889	0	0	2.53527	0	0.343956	0	0.314612	0.914833	0	0.132634	0	0.0707149	0	0	0.162867	0	0.561154	0.147222	0	1.37938	1.39385	1.28593	0	0.690792	Low
TCGA.A3.A6NI	0	2.78904	0	0.0288555	0.127041	0	0	0	1.64273	0	3.57169	1.86775	0.104313	1.40075	0	0.150814	0	0	0	0.816337	0.824269	0	0.926507	0	1.85768	0.457018	1.91716	0.685886	0	1.18462	High
TCGA.CW.6093	0	8.61918	0.496039	0	0	0	0	0	1.56109	0.0406163	1.80303	0.14868	0	1.69487	0	0.44597	0	0	0	0	0	0	0.81282	0	1.11763	0	0	0.479584	0	0.645463	Low
TCGA.B0.4698	1	0.115068	2.63061	4.07662	0	4.41615	0	1.3706	0.989783	0.253754	1.64036	1.36185	0.722764	1.30437	0.290842	0.643325	0.990119	0.592392	1.75346	0	0.0736438	0.290187	0	0.677415	3.31193	2.12786	1.73793	0.413086	3.23201	28.0782	High
TCGA.A3.3373	0	4.4411	0	0	0.137451	0.245113	0	0	1.04071	0.22991	0	0	0.578092	1.05582	0	0	0	0	0	0.201321	0.0844323	0	0	0.155777	1.47318	0.906244	0.611606	0.947409	0	0.357079	Low
TCGA.B0.5705	0	12.4301	0	0	0	0	0	0	0.727261	0	0	0.253788	0	0.28569	0	0	0	0	0	0.0206854	0.144498	0	0	0	0.514011	1.34313	0.951311	0	0	0.350225	Low
TCGA.AK.3455	1	1.87123	0	0.0676436	0	0	1.64231	0	2.912	0.456381	0.759375	0.427153	0.960868	0	0	0	0	0	0	0.195293	0.894928	0	0.226991	0	0.751204	2.16042	0	0	0	0.628082	Low
TCGA.BP.5201	0	2.60548	0	0.816477	0	0	0	0	2.44566	0	1.75648	0.88084	0.557092	1.04056	0	0	0	0	0.406381	0.669826	0.602279	0	0.247591	0	1.30206	2.19872	1.5238	1.03617	0	0.652123	Low
TCGA.CZ.5989	0	5.21918	0	1.45167	0	1.82091	0	0	1.83654	1.28762	0	0	0.0958548	0	0	1.18308	0	0	0.575265	0	0.204855	0.175252	0	1.07044	0	1.47959	0.783159	0	0	5.28404	High
TCGA.A3.3311	1	3.26301	0	0.0510202	0.345564	0.530136	0.829742	0	1.49247	0.194971	1.14321	0.666832	0.515771	0.941747	0	0.774667	0	0	0.0851337	0.721061	0.882779	0	0.0999919	0.244239	0	1.42973	3.42343	0.537625	0	0.528613	Low
TCGA.BP.4759	0	6.49863	0.252526	0	0.0202109	0.179301	0	0	2.32193	0	0.732749	1.61213	0.966021	2.17574	0.483653	0	0	0	0.0596749	0.295819	0.535798	0	1.76371	0.540055	0.4938	0.499589	0.485541	2.23461	0	1.09615	High
TCGA.CJ.4874	0	6.25479	0	0.420139	0	0.0936576	0	0	2.1947	0.13064	0.709719	0.42482	0.458408	0.887043	0	0.520343	0	0	0	0.215612	0.526079	0	0.511501	0.220811	1.70104	1.70546	0	0	0	0.513078	Low
TCGA.CJ.4876	0	5.35616	0	0.0317719	0	0	0.626963	0	2.22172	0.245676	0	0	0.691846	0.534918	0	0	0	0	0	0	0.881418	0	0	0	1.64459	0.474901	0	1.06524	0	0.4613	Low
TCGA.BP.4327	1	0.29863	0	0	0	0	0	0	1.84684	0	3.32244	0.657206	0.686499	1.30796	1.20057	0	0	0.124165	0	0.343749	0.26735	0	0.950119	0	2.31905	0.20869	3.2647	1.23032	0	1.53086	High
TCGA.CZ.4854	1	3.84658	0	1.20922	0.11089	0.299454	1.66408	0	1.94987	0	2.79488	1.65501	0.870935	1.24354	1.2236	0	0	0	0	0.634827	1.31782	0	0.243898	0	2.21576	1.72927	5.80972	2.43177	0	1.34054	High
TCGA.B8.A54F	0	1.42192	0	0	0	2.37763	0	0	2.88673	0	3.26948	1.12548	0	1.40532	0.783559	0.1618	0	0	0	0	0.555043	0	0.0145808	0.788528	1.15631	0	4.49046	0	0	1.87425	High
TCGA.BP.4337	1	0.00547945	1.5315	0.3901	0.0589342	0	2.50764	0	2.44935	0	2.19726	0.5485	0.680276	1.61879	1.94363	0	0	0	0	0.405873	0.881418	0	1.45316	0.0609952	0.799789	0.322406	1.17098	3.19835	0	1.97519	High
TCGA.B8.5553	0	1.19178	0	0.287832	0	0.573978	0	0	1.90516	0.228645	1.1816	0.433474	0.271541	1.25287	0	0.542897	0	0	0	0.389637	0.224002	0	0	0.566593	0.981206	0.942205	1.23484	0	0	0.494444	Low
TCGA.CZ.4863	0	5.28219	0.0732443	1.53362	0.203806	0.63493	0	0	1.80301	0.275262	0	0.554723	0.576051	0.809603	0	0.563022	0	0	0	0.240112	0.626286	0	0	0.0308596	0.926888	2.67613	0.935371	0	0	0.572865	Low
TCGA.CW.5584	1	0.449315	0	0	0	0.262513	0	0	1.62942	0.104168	0.376703	0.00730356	0.335126	1.77348	0	0.320752	0	0	0	0.727478	0.164908	0	0.430073	0	0	0	1.11431	0.274936	0	0.34651	Low
TCGA.3Z.A93Z	0	1.05479	0	0	0	0	0	0	2.35157	0	2.24886	0.367453	0.145926	1.16668	0	0	0	0	0	0.421331	0.56068	0	1.12852	0	1.44889	0.193139	0	2.04201	0	0.974649	High
TCGA.BP.4346	1	4.09041	0.816608	2.56787	0	0	1.03067	0	1.75606	0	0.598649	0	0.41349	0.0956356	0	0.761445	0	0	0.813917	0	0.172975	0	0	0	0	3.25637	0.335371	0.0607591	0	0.935032	High
TCGA.CJ.5678	1	1.5726	0	0.956853	0	0	2.72305	0	2.86777	0	0.00199967	0.169196	1.11964	0.6932	0	0.401444	0	0	0	0.212307	1.59511	0	0.633544	0	1.78024	3.07122	2.59939	1.23022	0	0.412248	Low
TCGA.B0.4699	1	0.30137	2.12736	3.84953	0.304895	2.3755	0	0.00498426	1.10058	0	1.58915	0.332935	0.159732	1.7863	1.78056	0.285462	0.350704	0.840888	0.891654	0	0.108342	0	0.21844	0.266404	0	2.38717	3.97415	0	1.76509	11.9186	High
TCGA.BP.5173	1	0.169863	0	1.16217	0	0	0	0	2.52137	0	0.963344	1.10768	0	1.0736	0	0	0	0	0.0398519	0.52069	0.600627	0	0.951285	0	1.80502	2.18268	0	1.30012	0	0.875608	High
TCGA.A3.3382	0	1.5726	0	1.18968	0.671891	0.797272	0	0	2.90714	0	3.28406	1.26569	0.690874	1.6185	1.24119	0	0.000420693	0	0	0.472566	0.331109	0	0.105239	0	2.62484	0.689795	4.35263	0.913771	0	1.70427	High
TCGA.CJ.4635	0	3.87945	0.18781	1.15157	0	0.0539954	0	0	1.44358	0	2.72278	0.346451	0.841087	0.88646	0	0.0424148	0	0.312894	0.465461	0.0868925	0	0	0.239234	0.0530239	0	2.12048	5.07705	0.12473	0	1.16477	High
TCGA.CW.5590	1	2.94521	0	0.0247726	0.0112598	0	0	0	2.67455	0	2.92218	1.37741	0	1.93157	0.413098	0.307239	0.414869	0	0	0.848614	0.531522	0	0.473022	0.311121	0.792113	0.872907	4.28887	1.79439	0	0.522167	Low
TCGA.CZ.4859	0	4.89589	0	0	0	0	0	0	1.13266	0	2.08522	0.497453	0	0.120413	0	0	0	0	0	0.325277	0.401866	0	0	0	1.20003	0	0	0.622207	0	0.685437	Low
TCGA.BP.5198	0	1.65205	1.38477	0.648979	0.461053	1.36567	2.52299	0	3.03057	0.254922	0.144651	0.839711	0.89495	3.13592	1.19785	0.0979268	0.0591415	0	0	1.11966	0.332373	0	0.706323	1.04371	2.00237	1.38181	4.60846	1.33862	0	0.670257	Low
TCGA.BP.4974	1	0.578082	1.52927	0	0	0.0759652	0	0	1.65809	0.273997	1.71605	0.0365705	0	2.20139	0	0.38725	0	0	0	0	0	0	1.5789	0.286429	0	0	3.03308	0.351254	0	0.960224	High
TCGA.B8.A7U6	0	1.35616	0.332304	0	0	0.281761	0.264256	0	1.97835	0.103779	2.2715	0.970197	0	2.35161	0	0.0414426	0	0	0	0.0971978	0	0	1.10957	0.197092	1.02746	0	0.762262	0.810134	0	0.942953	High
TCGA.AK.3431	1	6.13973	0.971208	0	0	1.2878	0	0	2.74793	0.483534	1.93849	0.493272	0.10655	2.64136	0	0.33203	0	0	0	0	0	0	1.64575	1.0197	1.4417	0	3.50673	1.16615	0	1.88732	High
TCGA.CJ.4634	0	9.58356	0.345034	0	0	0.347768	0	0	0.994545	0	1.06732	0	0	1.12024	0	0.130398	0	0	0	0	0	0	0.0987287	0	1.16904	0	1.8463	0	0	0.463054	Low
TCGA.DV.5575	0	4.73699	0	0.412556	0	0	0.168939	0	2.17847	0	2.38743	0.676069	0.0793265	1.38054	0	0	0	0	0.00380147	0.0269075	0.155092	0	0	0.171233	1.82426	0.761621	2.22032	0	0	0.540345	Low
TCGA.A3.A6NL	0	1.88767	1.37787	0	0	0.01375	0	0	3.26967	0	2.04528	0.705919	0	2.20188	0	0.547564	0	0	0	0	0	0	2.4538	0.215562	0.873056	0.974474	2.87494	0	0	1.44343	High
TCGA.CZ.5985	0	5.47123	0	1.17539	0.0101896	0.773747	0.749194	0	2.10752	0	1.52812	0.635426	1.04147	0.322516	0	0.658005	0	0	1.13983	0.926877	1.40024	0.236751	0	0.000918362	0	2.39563	1.61371	0.640095	0	1.87376	High
TCGA.B8.4151	0	3.5589	0	0	0	0	0	0	1.24744	0.351466	0.911161	1.00073	0	0.330192	0	0	0	0	0	0.392456	0.268808	0	0	0	0.862173	0	0	0	0	0.774834	Low
TCGA.CZ.5458	0	7.6411	0	0	0	0	0.212857	0	2.42573	0	1.25525	1.11925	0.689124	1.16979	0	0.190382	0	0	0.278893	0.152322	0.443659	0	0.89726	0	0	0.0913779	1.11091	0	0	0.905578	High
TCGA.CJ.4637	1	6.10137	1.31957	4.32247	0.195341	0.164622	2.96576	0	2.65987	0.528789	1.95277	0.425014	0.536869	0.624601	0.000848401	1.41135	0	0	1.00855	0.915696	0.614525	0	0.0540312	0.283999	0.977514	4.2524	3.37055	0.937979	0.310503	2.77635	High
TCGA.CW.5583	0	6.81918	0	0	0	0.00490379	0	0	0.663404	0	1.95617	0.367453	0	1.15318	0	0	0	0	0	0	0.0229088	0	0	0.067314	0	0	0	0	0	0.443961	Low
TCGA.A3.3329	0	4.44932	0	0.27568	0	0	0	0	2.84901	0	1.83276	0.400512	0.14544	0.435713	0	0.199618	0	0	0	0	0.451823	0	0.716137	0	0.54977	1.65385	2.0096	0.951784	0	0.851016	High
TCGA.B0.5097	0	1.82192	2.18547	0	1.62898	1.81585	0	0	3.01376	0.277403	1.07859	0.86995	0.324626	3.28682	1.53284	0.721975	0.202541	0	0.280933	0.381762	0.207771	0	2.17512	1.40679	1.41187	1.05155	4.01147	2.95413	0.534098	3.45427	High
TCGA.BP.4804	0	3.99726	1.09287	2.05196	0	0.601586	1.78912	0	2.34944	0	1.86658	0.823862	0.403378	1.83197	0	0.649449	0	0	0	0.22757	0.606167	0	1.20781	0.615685	0.577269	2.65261	3.10375	0.491543	0	1.05328	High
TCGA.B0.5092	1	1.25753	0.897358	2.46716	0	0	0.0785779	0	2.50903	0.126455	2.65631	0.876562	0.513924	0.991399	0.763248	0.230728	0	0	0.674671	0	1.00029	0	1.86166	0	0.448518	3.04274	2.65022	0	0.0613514	3.77808	High
TCGA.B0.5695	0	5.89041	0	0	0	0	0.398534	0	1.41306	0	2.73599	0.929748	0	1.28095	0	0	0	0	0	0.00318572	0.334122	0	0	0	2.64525	0	1.31697	0.690553	0	0.67788	Low
TCGA.BP.4160	0	7.89315	0.0197027	1.16926	0	0.50525	0.0541901	0	2.33456	0.0904457	1.31268	0.988866	0.675026	0.972257	0	0.840679	0	0	0	0.297763	0.356574	0	0	0.506905	0.985968	2.68303	0.645431	1.40736	0	0.611453	Low
TCGA.BP.4992	0	1.3726	0.602053	2.07869	0	0	0.821677	0	2.55675	0	3.87458	0.74209	0	0.551436	1.93411	0	0	0.0438925	0	0	0.123796	0	0	0	0.679784	2.51838	1.83406	0.947895	0	2.04195	High
TCGA.AK.3440	0	7.84932	0	0	0	2.36859	0	0	0	0	0	0.14868	1.18847	0	0.842452	0	0.139153	0.307452	0	0	0.958687	0	0.277033	0	0	0	0	1.63544	0	1.66743	High
TCGA.CJ.4891	1	2.24384	0.11736	0.606983	1.1283	0.346698	0.0195031	0	2.0667	0.94903	3.35801	2.05385	1.83415	2.40087	4.80256	0.307433	0.583351	0.316976	0	1.92436	1.40898	0	1.68131	0.243753	2.17562	0.461975	3.76342	2.39648	0	8.26553	High
TCGA.DV.A4VZ	0	1	0	0	0.420384	0	0	0	1.74216	0	2.7118	0.983032	0.98605	0.55814	0	0	0	0	0	0.213668	0.218365	0.159124	1.77003	0	0.656366	0	2.27028	0	0	2.51047	High
TCGA.CJ.4897	0	9.15342	0	0	0	0	1.46266	0	1.97932	0	1.34446	0.250093	0.26493	0.969148	0	0	0	0	0	0.0928229	0.280083	0	0	0	1.69978	0.888749	1.49183	0	0	0.397509	Low
TCGA.CZ.5464	0	5.83014	0.345131	1.21398	0	0.373917	0.793111	0	1.48168	0	2.10038	1.17059	0.970299	1.62841	0	0.858567	0	0	1.09727	0.0919479	1.04305	0	1.16583	0.435941	0	2.61111	4.47471	1.79381	0	1.76867	High
TCGA.CZ.5462	1	0.852055	0	1.22127	0	0	0.161263	0	1.64487	0.732	0	0.633967	1.31039	0	0	0.68892	0	0	0.0549135	0.386623	1.75373	0	0	0	0.384678	2.02941	1.76252	0	0	0.732374	Low
TCGA.B0.4828	1	0.841096	0	0	0	0	0	0	1.96192	0	2.99108	0.926831	0.913422	0	0.0197991	0	0	0.0114335	0.788069	0.345596	0.551544	0	0	0	0	0	0	1.83999	0	1.52573	High
TCGA.BP.4769	0	5.13973	0.113085	0	0	0	0	0	0.970733	0	1.43464	0.00117791	0.0276998	1.09915	0	0	0.0690579	0	0	0	0	0	2.32214	0.758489	0	0	1.97956	2.98943	0	1.41304	High
TCGA.BP.4169	1	1.92055	1.23105	0.838545	0.237762	0.690534	1.78019	0	2.8251	0.0559933	2.44758	0.379121	0.381211	2.03466	0	0.850595	0	0	0	0	0	0	0.831865	0.587105	2.55041	1.71421	4.58202	2.03968	0	1.0943	High
TCGA.B2.A4SR	0	1.38904	0	0	0	0	0	0	1.87347	0	2.00136	0	0.101883	1.49675	0	0.0726499	0	0	0	0	0	0	0.92573	0.0692582	0.244558	1.25458	0.493123	0.48814	0	0.536404	Low
TCGA.CJ.4916	0	3.76164	0.315299	1.94026	0	0	0.93011	0	2.7975	0.0325385	1.72227	0.524775	0.385781	0.58146	0	0.279823	0	0	0	0.25732	0.733198	0	0.310459	0	0.706311	3.14392	1.67242	0	0	0.681113	Low
TCGA.CJ.4882	0	5.1589	1.69387	1.22827	0	0	3.74782	0	3.99056	0	2.07346	0.648552	0.22147	2.2148	0.732441	0.227908	0.0308505	0	0.0678372	0.456038	0.428691	0	2.49529	0.647085	1.11297	1.95505	1.27994	4.28907	0.095945	2.583	High
TCGA.B8.4146	0	1.4	0	0.504131	0	1.42827	0	0	1.51317	0.635163	0.47446	0	0.561175	0	0	0.421957	0	0	1.57924	0	0	0	0	0.174344	0.78191	1.52818	0.767122	0	0	2.94638	High
TCGA.CJ.5679	1	1.86027	0	0	1.71684	0	0	0	2.67756	0	3.427	2.29071	1.89268	2.26222	2.70253	0	0	0.431069	0	1.39733	1.06628	0	0	0	4.72722	0	4.22929	2.48981	0	2.57415	High
TCGA.B0.5709	0	10.8877	0.914557	1.46333	0	0.633374	2.52396	0	2.29812	0.0123926	0.913688	0	0.366822	1.3271	0	1.03142	0	0	0	0	0	0	0.372841	0.52139	0.466981	2.66038	1.53294	0	0	0.526896	Low
TCGA.B2.4102	0	2.60822	0	0.467773	0	0	0	0	0.854974	0	0.997743	0.206241	0	0.51325	0	0.630783	0	0	0	0.132586	0.196496	0	0	0.111351	0.857217	1.45781	0.467754	0	0	0.409032	Low
TCGA.B8.5162	0	0.0986301	1.90124	3.12714	0.372515	2.04128	5.58216	0	2.97964	0.377549	1.62578	0.415388	0.65772	2.71734	0	1.61211	0.471451	0	0	0.283472	0.305061	0.120941	0.962654	1.4102	1.81094	4.74935	3.04096	0.117925	0	1.15357	High
TCGA.B8.5550	0	4.04384	1.03379	0	0.445973	1.1485	0	0	1.96416	0.0886939	0.966842	0.674027	0.8056	1.72771	0	0.256685	0	0	0	0.186252	0.487979	0	1.52273	0.735353	1.06973	0.74918	1.95798	2.26368	0	1.27507	High
TCGA.B0.5702	0	5.95068	0	0	0	0	0.151158	0	3.22175	0	2.59412	0.574947	0	1.38803	0	0	0	0	0	0.441747	2.62896	0	1.26378	0	0.730993	0.657722	2.13624	2.21584	0	0.949287	High
TCGA.CJ.4912	0	4.53973	0	0.363464	0.444124	0	1.85762	0	2.2676	0	3.85952	1.98355	0.903214	1.25025	0	0	0	0	0	1.86661	1.40286	0	0.538125	0	1.24386	1.25225	5.22187	1.66266	0	0.885933	High
TCGA.BP.4349	0	1.01918	0.590781	0	0	0	0	0	1.79582	0.152051	1.7902	0.721671	0.531327	1.57944	0	0	0	0	0	0.0581152	0	0	1.28263	0	2.0116	0	0.01705	0.41328	0	1.02142	High
TCGA.B0.5696	0	7.14795	0	0	0	0	0	0	1.70057	0	2.45778	1.79891	0.871227	1.54359	0	0	0	0	0	1.34366	1.03168	0	0.94322	0	1.67199	0	1.11985	2.651	0	0.917132	High
TCGA.BP.4781	0	5.69863	0	0	0.453854	0.915967	0	0	1.53553	0	1.9209	0.434932	0.704485	1.46275	0.589874	0.463081	0	0	0	0.517482	0.151496	0	0	0.045733	1.42304	0.171271	3.72182	1.75589	0	0.734036	Low
TCGA.BP.4163	0	7.77808	0	0	0.463583	0	0	0	0.802975	0	2.01584	1.22038	0	1.05456	0	0.402319	0	0.0179447	0.275103	0.221445	0.814063	0	0.306183	0.114656	0	0.464405	1.27614	0.558819	0	0.810776	Low
TCGA.CW.6097	1	1.56438	1.13057	1.30702	0.61439	0.685091	3.32536	0	2.73792	0.83779	1.66387	0.716712	0.209317	1.39745	0	0.839512	0	0.00978134	0.675254	0.774046	0.661664	0	0.464568	0.53743	1.60591	2.59118	1.57853	1.06563	0	2.33006	High
TCGA.BP.4962	0	4.89041	0.0326265	1.53391	0.0154435	0.857543	1.40893	0	2.30473	0.0111274	1.75298	1.16845	1.49434	0.326985	0	0.471247	0	0	0	0.806518	1.2145	0	0.0716187	0.773363	0.623231	1.74142	1.23075	2.20739	0	0.907229	High
TCGA.B0.4697	1	1.58356	2.23706	3.20763	0.239124	0.0912273	6.37073	0	2.54101	0	2.98855	0.697849	0.410768	2.30672	3.92927	0.106871	0.541352	0	0.0962112	0.478593	0.302243	0	2.65883	0.0844232	0.148748	4.8516	4.07368	2.12251	0.593665	4.06562	High
TCGA.B8.5549	0	0.531507	0	0.389614	0	1.26398	0	0	1.54544	0	1.38663	0.732172	0.692915	1.73597	0	0.231603	0	0	0	0.821004	0.383496	0	0	0.119419	0.583877	0.423195	4.22443	0.599457	0	0.518033	Low
TCGA.BP.4998	0	2.55342	0.295476	1.12795	0	0.229753	0	0	2.05426	0.00489869	1.41656	0.0458076	0.271541	1.3271	0	0.558161	0	0	0	0	0	0	0.632087	0.981104	0.432485	1.23651	4.31298	0	0	0.576915	Low
TCGA.B0.5690	0	9.29315	1.71039	0	0	0.940659	1.20304	0	3.11163	0	1.56378	0.242801	0	2.80139	0	0.830957	0	0	0	0	0	0	2.00032	0.486005	0.895599	0.243777	0	1.08546	0	1.25523	High
TCGA.G6.A8L8	1	2.98904	0	0	0	0	0	0	2.89926	0	2.39657	0.330796	0	1.38268	0	0	0	0.0813079	0	0.228543	0.606555	0	1.65955	0	1.71999	0	0	0.688025	0	1.35023	High
TCGA.A3.3313	1	2.0137	0	0	0.169753	1.60656	0	0	0.461531	1.48061	0	0	0.873754	0	0	0	0.423716	0	0	0	0	0	0.200853	0	2.38823	0	0	1.59295	0	2.1485	High
TCGA.B2.5633	0	2.63836	0.27371	0.221338	0	1.69123	0	0	1.67218	0.0140471	1.70158	0.234925	0.239748	1.91709	0	0.599576	0	0	0.0359651	0.542078	0.299035	0	0.772495	0.533639	0.210062	1.40125	5.05654	0.115008	0	0.685236	Low
TCGA.CJ.4872	0	3.93151	0.812819	0	0	0.668856	0.57741	0	3.4106	0.112538	2.02594	1.24721	0.645178	2.32227	0	0.263588	0	0	0	0.393137	0.373291	0	1.39554	0.924916	1.69026	1.38132	3.94985	1.8223	0	1.05351	High
TCGA.CJ.5684	0	6.11233	0	0	0	0	0	0	2.04949	0	2.71063	1.16982	0.62933	1.17864	0	0.126606	0	0	0	0.288528	0.753512	0	0.712639	0	0.927374	1.46005	1.16971	0.902007	0	0.729374	Low
TCGA.CJ.4886	0	5.34795	0	0.727916	0	0.0146249	0	0	1.8275	0.0620274	1.47215	0.319323	0	1.58168	0	0.323669	0	0	0	0	0.00959333	0	0.967804	0.508655	1.00608	1.42905	3.43947	0	0	0.62937	Low
TCGA.BP.5009	1	2.99178	0.775796	0.296386	0.0734311	0	0.0685702	0	2.78905	0.197599	3.06755	1.33579	0.343974	1.84363	0	0.52044	0	0	0	1.0206	1.22451	0	1.62981	0.697829	1.45744	1.67018	5.61503	2.4132	0	1.33336	High
TCGA.BP.4969	0	4.91507	0	0	0	0	0	0	0.853516	0	0.819623	0.821237	0	0.453494	0	0	0	0	0	0	0	0	0	0	1.88722	0	0	0	0	0.576289	Low
TCGA.CZ.5461	1	0.90411	0	0	0	0	0	0	2.83239	0.316235	2.81335	1.07754	0.388989	1.24092	0.451097	0.349821	0	0	0	0.303888	0.59703	0	0.839444	0.58973	0.488455	0.838306	2.96621	1.50263	0	1.30691	High
TCGA.CW.5587	0	6.09863	0	1.91236	0	0.671675	0	0	1.33677	0	0	0	0.203678	0.720794	0	0.911065	0	0.0440869	0	0	0.484383	0	0	0	2.12898	3.00299	0.437915	0	0	0.488896	Low

## Sheet: Table.S5G
	Hazard Ratio(HR)	lower 95%CI	uppper 95%CI	p value
ADAM19	1.79	1.44	2.21	1.16e-07
AIM2	1.5	1.32	1.7	8.07e-10
ALDH18A1	2.47	1.72	3.55	9.49e-07
BCAT1	1.59	1.34	1.89	1.64e-07
CD79A	1.18	1.05	1.33	0.00527
CDT1	3.38	2.02	5.65	3.27e-06
CXCR4	1.27	1.06	1.53	0.0109
ELOVL5	2.38	1.49	3.79	0.000272
ENO2	1.41	1.19	1.67	8.65e-05
GAPDH	1.66	1.32	2.08	1.22e-05
HTATIP2	1.58	1.23	2.02	0.000358
ITGA5	1.33	1.1	1.6	0.00373
ITPKA	1.43	1.29	1.58	2.57e-12
LYN	1.59	1.09	2.32	0.016
MTHFD2	2.41	1.61	3.59	1.7e-05
NAT10	9.12	3.2	26	3.58e-05
NUSAP1	3.04	2.13	4.35	1.15e-09
P4HB	1.7	1.33	2.16	1.82e-05
PRR13	1.42	1.09	1.85	0.00849
PSME4	11.5	3.08	42.7	0.000279
PTP4A3	1.61	1.3	1.99	1.1e-05
RAB31	1.59	1.13	2.25	0.00761
SERPINE2	1.18	1.04	1.36	0.0135
SLAMF7	1.15	1.02	1.3	0.0273
TGFBI	1.14	1.06	1.22	0.000225
TRIB3	1.4	1.23	1.58	1.36e-07
UBE2C	2.01	1.64	2.47	2.2e-11

## Sheet: Table.S5H
	os	os_time	ADAM19	AIM2	ALDH18A1	BCAT1	CD79A	CDT1	CXCR4	ELOVL5	ENO2	GAPDH	HTATIP2	ITGA5	ITPKA	LYN	MTHFD2	NAT10	NUSAP1	P4HB	PRR13	PSME4	PTP4A3	RAB31	SERPINE2	SLAMF7	TGFBI	TRIB3	UBE2C	Riskscore
GSM5107730	0	3.13887	9.8701	3.91519	8.45895	9.33059	3.31674	5.30077	10.2887	9.97111	9.10427	11.997	6.25842	10.6672	3.31674	7.73862	7.77281	7.78961	6.20933	10.995	8.6687	10.3309	9.22958	9.93571	9.61368	6.13241	11.4521	6.10583	4.42555	1.99846e+19
GSM5107731	0	3.28293	6.36537	0	8.13053	9.34353	0	5.95615	7.33076	9.22931	8.58855	11.6323	5.73763	7.97243	0	7.04324	6.55582	8.16017	6.02221	10.2729	9.18674	9.20107	9.25701	7.22252	10.7844	4.41693	8.0217	1.96673	0	6.69028e+17
GSM5107732	1	2.42253	8.92366	5.0387	9.25996	10.2904	6.44686	5.30127	9.52517	9.97821	9.92356	13.2532	6.58003	9.28835	0.954122	8.21985	7.99448	9.00224	5.90817	11.4732	9.40863	9.51412	10.0113	8.17376	9.86241	6.55148	9.58626	5.58098	3.23821	3.97242e+19
GSM5107733	0	2.80564	9.28751	2.71385	8.53662	7.08289	3.30702	7.74505	8.37686	8.54952	9.01101	12.5462	7.20754	10.4456	4.39359	8.15278	6.73679	8.33275	6.36083	11.9715	9.23523	10.022	10.8301	9.73812	9.66292	6.45529	10.5648	8.29749	5.23652	6.18992e+18
GSM5107734	1	0.874469	9.10252	4.36785	8.26834	7.56261	4.15705	7.8172	8.22839	9.04619	9.45382	14.4277	7.38019	9.13168	5.42962	7.56261	6.61221	8.47022	6.82359	11.7925	9.8011	10.1501	10.7149	9.48806	10.4771	7.54103	9.56758	8.4472	4.7148	9.79101e+19
GSM5107735	0	2.68743	6.90989	1.80091	7.7121	5.79847	1.16491	4.4671	6.78545	7.98393	7.93351	12.2031	5.21037	7.90388	1.16491	6.57601	6.9394	8.11252	4.54593	10.5258	9.17337	9.37575	7.21743	7.32193	8.07314	4.62068	7.6949	4.62068	1.16491	4.97119e+16
GSM5107736	0	3.07943	7.70379	0	8.57511	5.64354	2.75775	7.51213	6.71069	7.29106	10.172	14.1311	7.26426	9.06101	6.35205	7.09213	4.58819	8.07146	4.19301	12.3797	9.13682	8.37677	10.5391	8.04021	10.0558	3.64696	9.8594	8.28644	1.95669	1.03465e+17
GSM5107737	1	1.45505	8.29298	2.85856	8.13616	10.5045	4.37857	6.68833	8.47302	9.01364	11.9589	14.6686	7.46009	10.2811	3.75551	8.74241	7.92349	8.4257	6.55076	12.6987	9.52504	10.79	9.34255	9.6594	11.7222	9.01364	11.5292	8.12543	6.16724	8.33623e+19
GSM5107738	1	0.5025	9.05629	3.41431	8.80838	7.77706	5.27348	7.00595	8.92767	8.98656	9.53344	13.1215	7.52798	10.0576	4.75945	7.60159	6.71894	8.32113	6.74516	11.5933	9.4502	9.67145	10.161	9.49339	10.7673	5.37773	9.84364	5.30907	4.81001	1.13279e+19
GSM5107739	0	3.01495	8.95813	3.55476	8.61336	5.86643	6.3191	5.45961	7.52179	8.78727	10.6831	12.5111	6.94074	9.37115	1.48125	8.11349	6.03361	8.02694	4.37232	10.7701	9.27009	9.5747	10.3875	8.31364	11.4858	7.11869	9.87645	4.60257	4.09821	1.40908e+18
GSM5107740	1	1.05889	9.27925	2.34011	8.99131	9.31651	3.99088	6.1585	9.41997	10.4161	11.6262	14.0078	7.49017	10.1481	2.34011	7.52241	7.70206	8.36692	5.88855	11.1249	10.4625	10.659	9.27295	9.82302	11.4276	5.67568	10.9223	7.61503	5.95306	1.47186e+20
GSM5107741	0	2.39461	8.10404	3.70201	8.24575	7.56117	4.93024	4.44307	7.78485	8.99735	8.80643	12.6166	7.03312	9.15768	1.06502	8.70057	6.93351	8.13239	4.36875	10.8154	9.48681	10.1743	8.98185	8.95352	11.5712	6.50081	9.52794	4.29039	2.4246	2.58874e+18
GSM5107742	0	2.36691	6.72352	2.14189	8.66957	6.41273	2.14189	4.98735	6.96602	8.06815	8.97048	12.9363	7.59461	7.55151	0	7.00488	7.5339	8.26241	4.76391	11.5355	8.93738	9.39784	8.16855	7.64468	9.65767	6.09022	8.4849	4.17529	1.71176	5.64161e+16
GSM5107743	1	2.55527	9.12367	2.92551	8.8666	7.79021	4.0733	6.3717	9.24471	9.26341	8.30541	13.2263	7.46346	9.91717	4.84344	7.99809	6.71753	8.26266	6.93538	11.7508	10.0452	9.45731	9.84863	9.16736	10.5595	6.6047	10.119	6.27669	4.90827	7.51929e+18
GSM5107744	0	2.34341	7.27134	2.58094	8.43814	7.31714	1.58174	4.94954	8.2573	8.73329	8.12963	12.2086	6.3351	8.34393	0	7.41307	7.02865	8.22402	5.20477	10.7667	9.32162	9.6534	7.93772	8.40883	9.40882	6.2047	9.1601	4.58035	2.58094	3.69626e+17
GSM5107745	0	2.17526	7.72995	2.4583	8.73037	8.25011	2.953	6.14331	7.81881	8.77917	8.09864	13.1911	7.32731	8.58171	2.72677	7.32731	7.4249	8.31265	4.97021	11.8581	9.84078	9.39951	9.80316	8.88927	10.2756	5.92049	9.34819	5.92049	3.61345	6.38843e+17
GSM5107746	0	2.69735	8.13898	1.86291	8.33435	7.96716	4.37718	5.0861	8.63639	8.47466	9.81648	11.9675	6.75243	8.69265	1.21332	7.96716	6.95001	8.07692	5.97682	10.6022	8.82019	9.64412	8.4959	8.98319	9.86421	6.7167	10.2829	6.37087	1.86291	8.39415e+17
GSM5107747	0	2.6718	7.63469	2.48504	8.21351	6.57392	3.88708	5.05264	7.85605	8.10123	9.76759	12.8621	7.045	8.63662	2.02347	7.29781	5.83157	8.35868	5.45677	11.1266	9.64727	9.18282	8.72812	7.87971	9.2036	6.3884	8.79436	5.97909	2.83417	7.01803e+17
GSM5107748	1	2.29768	9.32613	5.02391	8.27726	9.65035	7.71804	5.45037	9.72682	9.46135	9.2773	12.9201	6.80581	9.13837	2.01853	8.4083	7.13302	8.51646	5.02391	11.0553	9.42338	9.62269	9.35331	8.53636	10.4351	8.49628	9.89963	4.77866	2.01853	7.40093e+18
GSM5107749	0	2.49185	8.3726	0.926303	7.42687	5.37563	3.7661	4.49883	9.46167	8.29614	10.2357	11.9955	5.24472	10.1593	1.88795	7.14424	5.17451	8.30438	4.02737	11.2633	9.15263	9.09204	9.54576	7.30894	10.3879	5.6588	8.87405	5.63286	3.18641	3.32294e+17
GSM5107750	0	2.41504	7.23402	3.76011	8.77174	6.73634	4.58535	3.96721	8.22419	8.94399	10.186	12.9593	7.39506	7.97716	0	7.77159	7.10845	8.41307	4.76255	10.9494	9.44382	9.71012	7.22397	8.6074	10.4198	7.47356	9.39311	5.06256	1.62831	6.83966e+17
GSM5107751	0	2.31308	9.09795	3.74101	8.87172	8.07007	5.14819	6.3314	9.13696	9.25433	8.30586	13.129	6.98272	9.28735	2.18094	7.57059	7.59057	8.19278	5.91177	11.7412	9.16388	9.44564	9.18594	9.12103	11.1475	6.98272	10.6897	5.73157	4.22285	1.04434e+18
GSM5107752	1	1.70044	8.96918	3.49867	8.80366	7.52815	5.55141	7.83082	9.60095	8.68062	9.33411	12.9371	7.49857	9.56036	4.4334	8.2097	7.32403	8.25463	5.74021	12.7574	8.95018	10.4115	9.65391	9.49819	9.73702	7.22814	10.1736	9.1079	4.90865	6.84592e+18
GSM5107753	0	2.27136	9.33738	2.89361	7.86695	7.61307	3.47332	4.27615	9.16799	8.82054	8.20009	11.4814	6.5655	9.86657	0.940204	7.65313	7.48575	8.08765	4.74014	10.3363	8.80876	9.59559	8.71725	9.2767	9.11399	6.21919	10.7366	5.43507	2.225	2.43084e+17
GSM5107754	0	2.23095	8.25108	2.87829	8.52929	8.31003	4.49823	5.28972	8.73688	8.52432	7.93634	12.2246	6.81775	9.47678	3.10826	7.81948	7.09751	8.23292	5.62298	10.744	8.78338	10.5595	9.50481	8.91072	8.18333	6.91209	9.09965	5.69551	3.63635	1.30645e+19
GSM5107755	0	2.14023	7.34252	2.28428	7.18512	6.64905	3.12803	4.51959	7.69672	8.78893	6.7214	10.5045	6.29322	8.48039	1.1956	7.30769	6.33993	7.79219	5.4878	9.45998	9.57916	9.384	7.66954	8.76346	8.71997	5.35764	8.16726	3.79743	0	9.87176e+16
GSM5107756	0	1.87992	8.04934	3.68609	8.50955	7.38541	4.68121	4.12409	9.24855	9.27218	8.52036	13.0586	6.62512	8.45052	1.90285	8.16402	6.93608	8.11734	5.57204	11.3463	9.47647	9.81747	7.65095	8.5732	10.3203	6.47029	10.0365	5.36386	3.20455	3.50023e+18
GSM5107757	0	1.82556	7.51891	2.60935	8.17633	7.11647	1.82831	3.90991	8.70775	8.37232	6.83954	12.6073	6.72243	8.4896	2.88321	7.59703	6.85552	8.32145	4.02741	11.2913	9.41126	9.51803	7.45742	8.35556	8.22018	5.95949	9.15781	3.78197	1.82831	1.90427e+17
GSM5107758	1	1.58496	8.74872	4.85563	9.65147	9.72479	6.00685	5.96948	10.336	10.9554	8.31072	13.9685	8.44271	10.3092	5.6533	9.03762	7.92309	8.4529	6.80721	12.9285	10.0077	9.78518	9.65147	9.7676	10.9404	8.01307	11.3771	7.73547	5.55581	8.86204e+19
GSM5107759	0	1.7761	7.36162	3.4253	8.60195	7.29357	4.81062	4.43083	7.8688	8.69156	8.06234	13.0265	7.07932	8.23814	1.05832	7.48007	6.77154	8.37615	4.69479	10.9273	9.44292	9.78317	7.40834	8.1801	9.66886	5.94538	9.26397	5.01764	2.90597	1.05196e+18
GSM5107760	0	1.81421	8.20496	3.95629	8.7883	8.56793	4.50993	5.53552	9.05029	9.62526	7.64878	11.757	8.24867	9.40538	3.33294	8.69974	7.66177	8.09911	5.38697	11.6748	9.3219	9.92375	9.31986	9.63517	10.8072	7.11856	10.475	6.85006	3.19675	2.57278e+18
GSM5107761	0	0.938599	7.65596	1.53715	9.04156	8.2986	3.93232	5.57303	8.11282	8.44753	9.41764	12.355	7.30317	8.66595	0.964288	8.59321	7.38754	8.36253	5.09967	11.6085	8.82266	9.6943	8.9966	9.2721	9.68433	6.48306	10.2406	6.88248	3.10583	5.55337e+17
GSM5107762	0	2.38494	8.15153	3.26972	8.58227	7.6146	6.35197	4.46802	8.20886	10.1899	8.78436	12.5367	6.60068	8.80309	2.27563	7.60751	7.62165	8.67673	5.11345	11.5155	8.38084	10.1538	9.65276	9.00539	10.1106	7.48909	9.64586	4.404	3.11838	1.97909e+19
GSM5107763	1	0.584963	8.78371	3.50773	8.82745	9.02823	6.23299	5.7025	8.79671	9.63923	11.4992	14.0461	7.58893	9.67629	2.88446	8.57313	7.81537	8.69759	6.71073	11.8354	9.48389	10.5226	9.56365	9.35972	12.3263	6.97147	11.1067	7.19222	5.78833	2.1386e+20
GSM5107764	0	0.5025	8.35173	3.14145	8.52643	7.34316	5.01331	4.4929	8.69592	11.2666	8.3474	13.1447	7.5828	9.28991	3.14145	7.70279	7.94534	8.35173	3.96995	11.7777	9.22065	9.89277	7.93384	8.74936	10.8574	7.14806	10.5168	8.67881	1.56365	3.31009e+18
GSM5107765	0	1.41504	8.59626	3.90501	8.98036	8.42752	5.96253	5.57294	9.4845	9.10768	9.52916	13.502	8.10827	9.32068	2.85072	8.63059	8.14436	8.50667	7.08075	12.2221	9.56363	9.56363	8.58171	8.90288	9.29415	7.83651	10.459	6.09956	4.89423	3.11622e+18
GSM5107766	0	1.41504	8.11444	3.16129	8.47413	8.32571	5.44994	4.99059	8.69767	9.09097	8.57903	12.7391	6.34796	9.1727	2.57686	7.53723	7.31228	8.33904	4.99059	11.3407	8.81049	9.28032	9.23823	8.68031	10.4811	6.41666	9.8622	3.99089	3.69148	9.52127e+17
GSM5107767	0	1.41504	6.64269	2.19052	8.53115	6.31147	4.6474	5.71939	6.0456	8.18303	9.13096	13.7161	8.16523	7.99928	2.44779	6.9643	6.7179	8.56889	5.565	12.7567	9.03863	9.05806	8.70142	6.78938	9.4688	5.16009	8.87849	5.66974	2.85561	2.90238e+17
GSM5107768	0	1.36923	8.95852	3.27526	8.25713	7.53939	5.70058	5.11444	9.27007	8.83196	8.11472	12.1785	6.99354	9.64335	2.26252	7.96298	7.22045	8.33192	5.18069	11.3341	9.41816	9.27007	8.44855	9.00801	9.0381	6.47415	11.1544	6.70177	2.41708	2.86792e+17
GSM5107769	0	1.05889	7.16317	3.2705	8.76768	7.24023	3.99462	6.67861	6.76459	9.36966	8.7546	12.8369	5.7881	8.38886	2.51551	7.23271	7.11489	8.20886	7.50042	11.1547	9.62947	9.47544	9.59761	7.50042	10.4768	4.42256	9.74502	4.75218	5.18529	8.7464e+18
GSM5107770	0	1	7.84226	1.48496	8.81049	9.76779	3.66609	4.93947	8.39073	9.54617	8.68051	13.226	7.62936	10.2747	3.18522	7.93533	6.92528	8.21408	5.06107	12.1698	9.45481	9.99843	8.87549	9.62881	11.5158	6.0393	9.79434	5.91576	0	3.99735e+18
GSM5107771	0	2.36923	8.66571	4.05145	8.70663	9.25317	6.47626	5.3754	9.27873	9.29134	9.11811	13.349	8.80037	9.38004	2.29137	8.72268	7.41644	8.37545	7.09333	12.4111	9.65559	9.54559	7.79097	9.52438	10.06	6.96426	10.7641	5.26282	4.46168	3.30851e+18
GSM5107774	0	0.736966	6.71288	1.45744	8.55293	6.80588	4.39792	4.76519	7.83295	9.80726	9.48046	13.9651	6.42109	7.79375	0	7.61896	6.65156	8.56295	5.09501	11.5203	9.52901	10.1838	8.26017	8.04811	11.67	5.1314	8.94672	4.06317	3.6265	1.32703e+19
GSM5107775	0	0.584963	10.7466	4.2143	8.48636	7.76378	6.21805	5.63504	10.4761	9.19903	9.45839	13.0287	6.68902	11.9512	3.60597	8.53063	6.70014	8.16784	5.72488	12.9146	8.56752	9.53179	11.0055	8.81261	11.3413	6.5849	12.3359	6.4465	4.68632	6.40175e+18
GSM5107776	0	0.584963	7.91332	3.65471	8.31043	8.70638	6.1269	4.98601	9.16637	9.31125	8.53659	12.6683	6.59221	9.05978	1.60696	8.04209	7.11654	8.34412	5.58675	11.0452	9.42441	9.4287	8.53394	8.62149	9.54391	7.73083	10.324	5.0468	3.30251	1.70527e+18
GSM5107778	0	0.5025	7.6622	2.79248	7.03805	5.19257	4.62719	4.23149	6.39223	7.10171	10.9082	11.084	8.18727	7.9657	5.19257	7.16267	4.23149	7.70382	3.68443	12.1032	7.16267	10.3035	10.3501	7.33147	11.3819	4.23149	9.47652	8.45436	4.23149	1.2429e+19
GSM5107779	0	0.415037	7.04881	0	6.05967	7.04881	6.05967	6.05967	9.21024	7.04881	0	10.0392	8.36419	7.04881	0	0	0	0	0	10.1266	7.04881	9.362	8.84836	7.63014	10.8966	7.63014	8.84836	6.05967	0	9.81656e+11
GSM5107780	0	0.222392	6.60172	3.05961	9.10288	5.9857	2.78031	5.58376	6.4034	9.23524	9.75103	13.8888	8.45533	7.81716	1.30305	6.65521	7.0401	8.63914	7.14853	12.1846	9.23524	9.45629	8.18404	8.07443	10.8127	5.49266	8.74408	5.86376	4.4776	3.28903e+18
GSM5107781	0	0.222392	8.30085	4.50768	8.60914	8.51612	6.04973	4.93813	9.179	9.43256	8.3483	12.9612	7.52522	9.64341	1.86239	9.41177	7.1897	8.33364	5.24435	11.4566	9.38785	9.96212	8.72826	10.009	11.5327	7.72269	11.1527	4.62792	3.60923	4.32967e+18
GSM5107782	0	2.23862	8.87601	3.81548	8.1936	8.34412	5.93935	4.86643	8.84478	8.98315	8.34412	12.0063	6.57852	9.12248	2.59225	8.30793	7.0855	8.18863	5.50041	10.762	8.85108	9.51654	8.87601	8.61606	9.86673	7.8225	10.4712	5.36609	2.32892	1.52469e+18
GSM5107785	0	1.58496	8.55326	2.72373	8.59568	7.72895	5.26198	5.33058	8.12629	8.85926	7.95218	12.2471	7.03196	9.25525	0.951812	7.81526	6.9251	8.31588	5.11415	11.3029	9.28581	9.49641	9.40194	8.99754	9.6867	7.24243	9.96004	5.54784	4.22894	6.04812e+17
GSM5107788	0	1.77259	8.41217	1.23793	9.19112	8.34443	1.89422	6.3547	8.84829	9.735	10.09	13.4951	8.27019	9.99718	4.11298	8.03636	6.44745	8.66487	7.23312	12.3363	9.37505	9.6089	10.7238	9.9691	11.2031	4.94905	9.67032	7.66842	5.699	6.61855e+19
GSM5107790	0	0.222392	5.94701	1.33188	8.30996	7.87445	2.01243	4.61578	7.11182	8.88995	8.77722	12.5819	5.7976	8.07447	1.33188	6.73406	6.26425	8.52132	6.37389	11.2549	9.1296	9.26918	9.01157	7.04708	11.2487	4.47523	8.13802	4.26361	2.47298	4.17868e+18
GSM5107791	0	1.76553	9.34424	5.99025	9.32473	8.61893	7.94785	5.48068	11.2137	9.57505	9.36826	12.8339	7.75725	9.56123	1.96724	8.89949	8.09714	8.37519	6.70476	11.8861	8.85485	10.068	9.34585	10.1907	10.67	10.1236	10.352	5.92265	4.76509	1.41553e+19
GSM5107792	0	0.369234	8.60671	4.77823	8.52581	7.49904	6.77287	6.24137	9.7255	9.27737	8.41623	13.0546	7.50317	9.11015	2.03935	8.42714	7.20164	8.45084	5.63615	12.032	9.41631	9.60485	9.12228	9.32363	9.98737	7.58725	9.91173	6.05145	3.74874	2.00967e+18

## Sheet: Table.S5I
Clinical data of TCGA-KIRC
ID	Sample	group	Age	Gender	Pathologic_stage	T_stage	M_stage	N_stage
TCGA-CZ-5984-11A-01R-1672-07	TCGA-CZ-5984-11A	Normal	<= 60	Male	Stage I	T1	M0	N0
TCGA-B8-5552-11A-01R-1672-07	TCGA-B8-5552-11A	Normal	<= 60	Female	Stage I	T1	M0	NA
TCGA-CZ-5465-11A-01R-1503-07	TCGA-CZ-5465-11A	Normal	> 60	Female	Stage III	T3	M0	NA
TCGA-CZ-5454-11A-01R-1503-07	TCGA-CZ-5454-11A	Normal	> 60	Male	Stage IV	T2	M1	N0
TCGA-B0-5699-11A-01R-1541-07	TCGA-B0-5699-11A	Normal	<= 60	Male	Stage I	T1	M0	N0
TCGA-CW-6088-11A-01R-1672-07	TCGA-CW-6088-11A	Normal	<= 60	Male	Stage I	T1	M0	N0
TCGA-B0-4700-11A-01R-1541-07	TCGA-B0-4700-11A	Normal	<= 60	Male	Stage IV	T4	M1	NA
TCGA-CZ-5469-11A-01R-1503-07	TCGA-CZ-5469-11A	Normal	<= 60	Male	Stage II	T2	M0	N0
TCGA-B0-5705-11A-01R-1541-07	TCGA-B0-5705-11A	Normal	> 60	Female	Stage I	T1	M0	N0
TCGA-A3-3358-11A-01R-1541-07	TCGA-A3-3358-11A	Normal	<= 60	Female	Stage I	T1	M0	N0
TCGA-CZ-4864-11A-01R-1503-07	TCGA-CZ-4864-11A	Normal	> 60	Male	Stage II	T2	M0	N0
TCGA-CJ-5689-11A-01R-1541-07	TCGA-CJ-5689-11A	Normal	> 60	Male	Stage I	T1	M0	NA
TCGA-B0-5690-11A-01R-1541-07	TCGA-B0-5690-11A	Normal	<= 60	Female	Stage I	T1	M0	NA
TCGA-B0-5712-11A-01R-1672-07	TCGA-B0-5712-11A	Normal	> 60	Female	Stage IV	T2	M1	N0
TCGA-CJ-6030-11A-01R-1672-07	TCGA-CJ-6030-11A	Normal	> 60	Male	Stage I	T1	M0	N0
TCGA-CZ-5462-11A-01R-1503-07	TCGA-CZ-5462-11A	Normal	> 60	Male	Stage IV	T1	M1	NA
TCGA-CZ-5989-11A-01R-1672-07	TCGA-CZ-5989-11A	Normal	<= 60	Male	Stage II	T2	M0	N0
TCGA-B0-5402-11A-01R-1503-07	TCGA-B0-5402-11A	Normal	> 60	Male	Stage IV	T4	M0	NA
TCGA-CZ-5463-11A-01R-1503-07	TCGA-CZ-5463-11A	Normal	> 60	Male	Stage II	T2	M0	NA
TCGA-CZ-5470-11A-01R-1503-07	TCGA-CZ-5470-11A	Normal	> 60	Female	Stage II	T2	M0	N0
TCGA-CZ-5456-11A-02R-1503-07	TCGA-CZ-5456-11A	Normal	<= 60	Male	Stage II	T2	M0	N0
TCGA-CZ-5458-11A-01R-1503-07	TCGA-CZ-5458-11A	Normal	<= 60	Male	Stage III	T3	M0	NA
TCGA-B0-5694-11A-01R-1541-07	TCGA-B0-5694-11A	Normal	> 60	Male	Stage III	T3	M0	N0
TCGA-CZ-5985-11A-01R-1672-07	TCGA-CZ-5985-11A	Normal	<= 60	Male	Stage II	T2	M0	N0
TCGA-CW-5581-11A-01R-1541-07	TCGA-CW-5581-11A	Normal	<= 60	Male	Stage I	T1	M0	NA
TCGA-CZ-5453-11A-01R-1503-07	TCGA-CZ-5453-11A	Normal	> 60	Male	Stage II	T2	M0	NA
TCGA-CW-5587-11A-01R-1541-07	TCGA-CW-5587-11A	Normal	> 60	Female	Stage III	T3	M0	N0
TCGA-B0-5701-11A-01R-1541-07	TCGA-B0-5701-11A	Normal	> 60	Male	Stage III	T3	M0	N0
TCGA-CZ-5451-11A-01R-1503-07	TCGA-CZ-5451-11A	Normal	> 60	Male	Stage II	T2	M0	N0
TCGA-CZ-5982-11A-01R-1672-07	TCGA-CZ-5982-11A	Normal	<= 60	Female	Stage I	T1	M0	NA
TCGA-B8-4622-11A-01R-1758-07	TCGA-B8-4622-11A	Normal	<= 60	Male	Stage IV	T3	M1	N0
TCGA-CW-6087-11A-01R-1672-07	TCGA-CW-6087-11A	Normal	> 60	Male	Stage IV	T3	M1	N1
TCGA-CZ-5467-11A-01R-1503-07	TCGA-CZ-5467-11A	Normal	> 60	Female	Stage III	T3	M0	N0
TCGA-B0-5709-11A-01R-1541-07	TCGA-B0-5709-11A	Normal	> 60	Female	Stage III	T3	M0	NA
TCGA-CJ-5677-11A-01R-1541-07	TCGA-CJ-5677-11A	Normal	<= 60	Female	Stage IV	T3	M1	NA
TCGA-CZ-5988-11A-01R-1672-07	TCGA-CZ-5988-11A	Normal	<= 60	Male	Stage I	T1	M0	N0
TCGA-CJ-5676-11A-01R-1541-07	TCGA-CJ-5676-11A	Normal	<= 60	Male	Stage III	T3	M0	NA
TCGA-CJ-6033-11A-01R-1858-07	TCGA-CJ-6033-11A	Normal	<= 60	Female	Stage IV	T3	M1	N0
TCGA-CZ-5466-11A-01R-1503-07	TCGA-CZ-5466-11A	Normal	> 60	Male	Stage III	T3	M0	NA
TCGA-CJ-5680-11A-01R-1541-07	TCGA-CJ-5680-11A	Normal	> 60	Female	Stage IV	T3	M1	NA
TCGA-CZ-5455-11A-01R-1503-07	TCGA-CZ-5455-11A	Normal	> 60	Male	Stage IV	T3	M1	NA
TCGA-B8-4619-11A-01R-1758-07	TCGA-B8-4619-11A	Normal	<= 60	Male	Stage I	T1	M0	N0
TCGA-B0-5711-11A-01R-1672-07	TCGA-B0-5711-11A	Normal	<= 60	Male	Stage III	T3	M0	NA
TCGA-CW-5580-11A-02R-1672-07	TCGA-CW-5580-11A	Normal	> 60	Female	Stage IV	T3	M1	NA
TCGA-CJ-5678-11A-01R-1541-07	TCGA-CJ-5678-11A	Normal	> 60	Male	Stage IV	T2	M1	N0
TCGA-CZ-5468-11A-01R-1503-07	TCGA-CZ-5468-11A	Normal	> 60	Male	Stage IV	T3	M1	NA
TCGA-A3-3387-11A-01R-1541-07	TCGA-A3-3387-11A	Normal	<= 60	Male	Stage I	T1	M0	N0
TCGA-B8-5549-11A-01R-1541-07	TCGA-B8-5549-11A	Normal	<= 60	Male	Stage I	T1	M0	N0
TCGA-B2-5641-11A-01R-1541-07	TCGA-B2-5641-11A	Normal	> 60	Male	Stage I	T1	M0	N0
TCGA-B2-5636-11A-01R-1541-07	TCGA-B2-5636-11A	Normal	> 60	Male	Stage I	T1	M0	NA
TCGA-CJ-5672-11A-01R-1541-07	TCGA-CJ-5672-11A	Normal	> 60	Male	Stage I	T1	M0	NA
TCGA-CZ-5452-11A-01R-1503-07	TCGA-CZ-5452-11A	Normal	> 60	Male	Stage II	T2	M0	N0
TCGA-CW-5591-11A-01R-1541-07	TCGA-CW-5591-11A	Normal	<= 60	Male	Stage IV	T3	M1	N0
TCGA-B0-5706-11A-01R-1541-07	TCGA-B0-5706-11A	Normal	<= 60	Male	Stage II	T2	M0	N0
TCGA-CZ-5986-11A-01R-1672-07	TCGA-CZ-5986-11A	Normal	> 60	Male	Stage I	T1	M0	N0
TCGA-B0-5697-11A-01R-1541-07	TCGA-B0-5697-11A	Normal	<= 60	Male	Stage I	T1	M0	N0
TCGA-CZ-5457-11A-01R-1503-07	TCGA-CZ-5457-11A	Normal	> 60	Male	Stage III	T3	M0	NA
TCGA-CW-5585-11A-01R-1541-07	TCGA-CW-5585-11A	Normal	<= 60	Male	Stage IV	T3	M1	N0
TCGA-CZ-5461-11A-01R-1503-07	TCGA-CZ-5461-11A	Normal	<= 60	Male	Stage IV	T1	M1	NA
TCGA-CJ-5681-11A-01R-1541-07	TCGA-CJ-5681-11A	Normal	<= 60	Female	Stage IV	T3	M1	NA
TCGA-CJ-5679-11A-01R-1541-07	TCGA-CJ-5679-11A	Normal	> 60	Male	Stage III	T3	M0	NA
TCGA-CZ-4863-11A-01R-1503-07	TCGA-CZ-4863-11A	Normal	<= 60	Female	Stage III	T3	M0	N0
TCGA-B0-5696-11A-01R-1541-07	TCGA-B0-5696-11A	Normal	> 60	Male	Stage III	T3	M0	N0
TCGA-CW-6090-11A-01R-1672-07	TCGA-CW-6090-11A	Normal	> 60	Male	Stage I	T1	M0	NA
TCGA-CW-5589-11A-01R-1541-07	TCGA-CW-5589-11A	Normal	<= 60	Male	Stage I	T1	M0	NA
TCGA-CZ-5987-11A-01R-1672-07	TCGA-CZ-5987-11A	Normal	<= 60	Male	Stage IV	T3	M1	NA
TCGA-CZ-4865-11A-01R-1503-07	TCGA-CZ-4865-11A	Normal	> 60	Female	Stage I	T1	M0	NA
TCGA-B0-5691-11A-01R-1541-07	TCGA-B0-5691-11A	Normal	> 60	Female	Stage I	T1	M0	N0
TCGA-B0-4712-11A-02R-1503-07	TCGA-B0-4712-11A	Normal	> 60	Male	Stage IV	T3	M1	NA
TCGA-CW-5584-11A-01R-1541-07	TCGA-CW-5584-11A	Normal	> 60	Male	Stage III	T3	M0	N1
TCGA-B0-5703-11A-01R-1541-07	TCGA-B0-5703-11A	Normal	> 60	Male	Stage I	T1	M0	N0
TCGA-B8-4620-11A-01R-1758-07	TCGA-B8-4620-11A	Normal	> 60	Female	Stage III	T3	M0	N0
TCGA-CW-5584-01A-01R-1541-07	TCGA-CW-5584-01A	KIRC	> 60	Male	Stage III	T3	M0	N1
TCGA-CZ-5984-01A-11R-1672-07	TCGA-CZ-5984-01A	KIRC	<= 60	Male	Stage I	T1	M0	N0
TCGA-B0-4841-01A-01R-1277-07	TCGA-B0-4841-01A	KIRC	> 60	Male	Stage IV	T2	M1	NA
TCGA-B0-4700-01A-02R-1541-07	TCGA-B0-4700-01A	KIRC	<= 60	Male	Stage IV	T4	M1	NA
TCGA-CJ-4905-01A-02R-1426-07	TCGA-CJ-4905-01A	KIRC	> 60	Female	Stage I	T1	M0	NA
TCGA-A3-3376-01A-02R-1420-07	TCGA-A3-3376-01A	KIRC	<= 60	Male	Stage I	T1	M0	N0
TCGA-A3-3382-01A-02R-1325-07	TCGA-A3-3382-01A	KIRC	> 60	Male	Stage I	T1	M0	NA
TCGA-DV-A4VZ-01A-11R-A266-07	TCGA-DV-A4VZ-01A	KIRC	<= 60	Male	Stage I	T1	NA	NA
TCGA-B8-A8YJ-01A-13R-A39I-07	TCGA-B8-A8YJ-01A	KIRC	<= 60	Female	Stage I	T1	NA	NA
TCGA-B0-4690-01A-01R-1277-07	TCGA-B0-4690-01A	KIRC	> 60	Male	Stage IV	T4	M1	N0
TCGA-B4-5836-01A-11R-1672-07	TCGA-B4-5836-01A	KIRC	> 60	Female	Stage I	T1	M0	N0
TCGA-CZ-5985-01A-11R-1672-07	TCGA-CZ-5985-01A	KIRC	<= 60	Male	Stage II	T2	M0	N0
TCGA-BP-4991-01A-01R-1334-07	TCGA-BP-4991-01A	KIRC	<= 60	Male	Stage I	T1	M0	NA
TCGA-BP-5184-01A-01R-1426-07	TCGA-BP-5184-01A	KIRC	<= 60	Male	Stage I	T1	M0	NA
TCGA-BP-4795-01A-02R-1420-07	TCGA-BP-4795-01A	KIRC	> 60	Female	Stage I	T1	M0	N0
TCGA-B0-4707-01A-01R-1277-07	TCGA-B0-4707-01A	KIRC	> 60	Male	Stage III	T3	M0	NA
TCGA-CZ-4854-01A-01R-1305-07	TCGA-CZ-4854-01A	KIRC	> 60	Male	Stage I	T1	M0	N0
TCGA-B2-5635-01A-01R-A277-07	TCGA-B2-5635-01A	KIRC	> 60	Male	Stage I	T1	M0	NA
TCGA-B0-5698-01A-11R-1672-07	TCGA-B0-5698-01A	KIRC	> 60	Male	Stage I	T1	M0	N0
TCGA-BP-4762-01A-02R-1289-07	TCGA-BP-4762-01A	KIRC	<= 60	Male	Stage I	T1	M0	NA
TCGA-B4-5834-01A-11R-1672-07	TCGA-B4-5834-01A	KIRC	<= 60	Male	Stage I	T1	M0	N0
TCGA-BP-5195-01A-02R-1426-07	TCGA-BP-5195-01A	KIRC	> 60	Male	Stage I	T1	M0	NA
TCGA-B0-5108-01A-01R-1420-07	TCGA-B0-5108-01A	KIRC	<= 60	Male	Stage III	T3	M0	N0
TCGA-B0-5703-01A-11R-1541-07	TCGA-B0-5703-01A	KIRC	> 60	Male	Stage I	T1	M0	N0
TCGA-B8-5165-01A-01R-1420-07	TCGA-B8-5165-01A	KIRC	<= 60	Male	Stage I	T1	M0	N0
TCGA-BP-4995-01A-01R-1334-07	TCGA-BP-4995-01A	KIRC	> 60	Male	Stage I	T1	M0	N0
TCGA-AK-3456-01A-02R-1325-07	TCGA-AK-3456-01A	KIRC	<= 60	Male	Stage II	T2	M0	N0
TCGA-CZ-5989-01A-11R-1672-07	TCGA-CZ-5989-01A	KIRC	<= 60	Male	Stage II	T2	M0	N0
TCGA-AK-3440-01A-02R-1277-07	TCGA-AK-3440-01A	KIRC	<= 60	Male	Stage I	T1	M0	NA
TCGA-CZ-4858-01A-01R-1305-07	TCGA-CZ-4858-01A	KIRC	<= 60	Male	Stage II	T2	M0	NA
TCGA-B2-5633-01A-01R-1541-07	TCGA-B2-5633-01A	KIRC	<= 60	Male	Stage I	T1	M0	N0
TCGA-BP-5169-01A-01R-1426-07	TCGA-BP-5169-01A	KIRC	> 60	Male	Stage I	T1	M0	N0
TCGA-B8-5546-01A-01R-1541-07	TCGA-B8-5546-01A	KIRC	<= 60	Female	Stage I	T1	M0	N0
TCGA-CW-6088-01A-11R-1672-07	TCGA-CW-6088-01A	KIRC	<= 60	Male	Stage I	T1	M0	N0
TCGA-BP-4164-01A-02R-1325-07	TCGA-BP-4164-01A	KIRC	<= 60	Female	Stage III	T3	M0	NA
TCGA-BP-4174-01A-02R-1289-07	TCGA-BP-4174-01A	KIRC	<= 60	Male	Stage II	T2	M0	N0
TCGA-CJ-4871-01A-01R-1305-07	TCGA-CJ-4871-01A	KIRC	> 60	Male	Stage IV	T3	M1	NA
TCGA-BP-4973-01A-01R-1334-07	TCGA-BP-4973-01A	KIRC	<= 60	Male	Stage III	T3	M0	NA
TCGA-BP-4807-01A-01R-1305-07	TCGA-BP-4807-01A	KIRC	<= 60	Male	Stage I	T1	M0	NA
TCGA-CJ-5683-01A-11R-1541-07	TCGA-CJ-5683-01A	KIRC	> 60	Male	Stage I	T1	M0	NA
TCGA-BP-4989-01A-01R-1334-07	TCGA-BP-4989-01A	KIRC	<= 60	Male	Stage III	T3	M0	N0
TCGA-DV-5573-01A-01R-1541-07	TCGA-DV-5573-01A	KIRC	<= 60	Male	Stage I	T1	M0	NA
TCGA-CJ-4908-01A-01R-1426-07	TCGA-CJ-4908-01A	KIRC	<= 60	Male	Stage I	T1	M0	NA
TCGA-A3-A8OW-01A-11R-A37O-07	TCGA-A3-A8OW-01A	KIRC	<= 60	Male	Stage III	T3	NA	NA
TCGA-CJ-4893-01A-01R-1305-07	TCGA-CJ-4893-01A	KIRC	> 60	Female	Stage I	T1	M0	NA
TCGA-B0-4714-01A-01R-1277-07	TCGA-B0-4714-01A	KIRC	> 60	Male	Stage IV	T3	M1	NA
TCGA-BP-4972-01A-01R-1334-07	TCGA-BP-4972-01A	KIRC	<= 60	Female	Stage III	T3	M0	NA
TCGA-CZ-5469-01A-01R-1503-07	TCGA-CZ-5469-01A	KIRC	<= 60	Male	Stage II	T2	M0	N0
TCGA-CZ-4861-01A-01R-1305-07	TCGA-CZ-4861-01A	KIRC	> 60	Male	Stage II	T2	M0	NA
TCGA-A3-A8OV-01A-11R-A37O-07	TCGA-A3-A8OV-01A	KIRC	> 60	Male	Stage I	T1	NA	NA
TCGA-BP-4758-01A-01R-1289-07	TCGA-BP-4758-01A	KIRC	<= 60	Male	Stage I	T1	M0	NA
TCGA-A3-3335-01A-01R-0864-07	TCGA-A3-3335-01A	KIRC	<= 60	Male	Stage II	T2	M0	N0
TCGA-B8-5552-01B-11R-1672-07	TCGA-B8-5552-01B	KIRC	<= 60	Female	Stage I	T1	M0	NA
TCGA-B0-5402-01A-01R-1503-07	TCGA-B0-5402-01A	KIRC	> 60	Male	Stage IV	T4	M0	NA
TCGA-B0-4821-01A-01R-1503-07	TCGA-B0-4821-01A	KIRC	> 60	Female	Stage III	T3	M0	N0
TCGA-B0-5705-01A-11R-1541-07	TCGA-B0-5705-01A	KIRC	> 60	Female	Stage I	T1	M0	N0
TCGA-B0-5116-01A-02R-1420-07	TCGA-B0-5116-01A	KIRC	<= 60	Male	Stage III	T3	M0	N0
TCGA-B8-A7U6-01A-12R-A37O-07	TCGA-B8-A7U6-01A	KIRC	<= 60	Female	Stage I	T1	NA	NA
TCGA-CZ-5463-01A-01R-1503-07	TCGA-CZ-5463-01A	KIRC	> 60	Male	Stage II	T2	M0	NA
TCGA-BP-4976-01A-01R-1334-07	TCGA-BP-4976-01A	KIRC	> 60	Male	Stage I	T1	M0	NA
TCGA-AK-3455-01A-01R-0864-07	TCGA-AK-3455-01A	KIRC	> 60	Female	Stage III	T3	M0	NA
TCGA-DV-5569-01A-01R-1541-07	TCGA-DV-5569-01A	KIRC	<= 60	Female	Stage I	T1	M0	NA
TCGA-BP-5181-01A-01R-1426-07	TCGA-BP-5181-01A	KIRC	<= 60	Female	Stage I	T1	M0	NA
TCGA-BP-4799-01A-01R-1305-07	TCGA-BP-4799-01A	KIRC	> 60	Male	Stage III	T3	M0	N0
TCGA-BP-4988-01A-01R-1334-07	TCGA-BP-4988-01A	KIRC	> 60	Male	Stage I	T1	M0	N0
TCGA-BP-4327-01A-01R-1289-07	TCGA-BP-4327-01A	KIRC	> 60	Female	Stage II	T2	M0	N0
TCGA-BP-4353-01A-02R-1289-07	TCGA-BP-4353-01A	KIRC	> 60	Male	Stage I	T1	M0	N0
TCGA-B0-5109-01A-02R-1420-07	TCGA-B0-5109-01A	KIRC	> 60	Male	Stage III	T3	M0	N1
TCGA-B0-5712-01A-11R-1672-07	TCGA-B0-5712-01A	KIRC	> 60	Female	Stage IV	T2	M1	N0
TCGA-BP-4177-01A-02R-1420-07	TCGA-BP-4177-01A	KIRC	> 60	Male	Stage I	T1	M0	NA
TCGA-B2-5633-01A-01R-A277-07	TCGA-B2-5633-01A	KIRC	<= 60	Male	Stage I	T1	M0	N0
TCGA-CZ-5454-01A-01R-1503-07	TCGA-CZ-5454-01A	KIRC	> 60	Male	Stage IV	T2	M1	N0
TCGA-BP-5191-01A-01R-1426-07	TCGA-BP-5191-01A	KIRC	> 60	Male	Stage III	T3	M0	N0
TCGA-BP-4994-01A-01R-1334-07	TCGA-BP-4994-01A	KIRC	<= 60	Male	Stage I	T1	M0	NA
TCGA-CJ-6027-01A-11R-1672-07	TCGA-CJ-6027-01A	KIRC	> 60	Male	Stage I	T1	M0	NA
TCGA-A3-3343-01A-01R-0864-07	TCGA-A3-3343-01A	KIRC	> 60	Male	Stage II	T2	M0	N0
TCGA-BP-5201-01A-01R-1426-07	TCGA-BP-5201-01A	KIRC	> 60	Male	Stage IV	T3	M1	N0
TCGA-CZ-5456-01A-01R-1503-07	TCGA-CZ-5456-01A	KIRC	<= 60	Male	Stage II	T2	M0	N0
TCGA-B0-4945-01A-01R-1420-07	TCGA-B0-4945-01A	KIRC	> 60	Female	Stage I	T1	M0	N0
TCGA-A3-3316-01A-01R-0864-07	TCGA-A3-3316-01A	KIRC	<= 60	Male	Stage II	T2	M0	NA
TCGA-B0-4828-01A-01R-1277-07	TCGA-B0-4828-01A	KIRC	> 60	Male	Stage IV	T2	M1	NA
TCGA-CJ-4640-01A-02R-1325-07	TCGA-CJ-4640-01A	KIRC	<= 60	Male	Stage III	T3	M0	N0
TCGA-CZ-5460-01A-01R-1503-07	TCGA-CZ-5460-01A	KIRC	<= 60	Male	Stage IV	T3	M1	NA
TCGA-CJ-6028-01A-11R-1672-07	TCGA-CJ-6028-01A	KIRC	<= 60	Male	Stage IV	T3	M1	NA
TCGA-B0-5096-01A-01R-1420-07	TCGA-B0-5096-01A	KIRC	> 60	Female	Stage III	T3	M0	N1
TCGA-CW-6097-01A-11R-1672-07	TCGA-CW-6097-01A	KIRC	<= 60	Male	Stage III	T3	M0	NA
TCGA-BP-5010-01A-02R-1420-07	TCGA-BP-5010-01A	KIRC	> 60	Male	Stage III	T3	M0	N0
TCGA-A3-A6NI-01A-11R-A33J-07	TCGA-A3-A6NI-01A	KIRC	<= 60	Male	Stage I	T1	NA	NA
TCGA-CZ-4862-01A-01R-1305-07	TCGA-CZ-4862-01A	KIRC	<= 60	Male	Stage I	T1	M0	NA
TCGA-BP-4354-01A-02R-1289-07	TCGA-BP-4354-01A	KIRC	<= 60	Male	Stage IV	T4	M1	N1
TCGA-CZ-4866-01A-01R-1503-07	TCGA-CZ-4866-01A	KIRC	> 60	Female	Stage I	T1	M0	NA
TCGA-CJ-4882-01A-02R-1426-07	TCGA-CJ-4882-01A	KIRC	<= 60	Male	Stage III	T3	M0	NA
TCGA-B2-5633-01B-04R-A277-07	TCGA-B2-5633-01B	KIRC	<= 60	Male	Stage I	T1	M0	N0
TCGA-B2-4102-01A-02R-1325-07	TCGA-B2-4102-01A	KIRC	> 60	Male	Stage I	T1	M0	NA
TCGA-B0-5690-01A-11R-1541-07	TCGA-B0-5690-01A	KIRC	<= 60	Female	Stage I	T1	M0	NA
TCGA-DV-A4W0-05A-11R-A266-07	TCGA-DV-A4W0-05A	KIRC	<= 60	Male	Stage I	T1	NA	NA
TCGA-DV-A4W0-01A-11R-A266-07	TCGA-DV-A4W0-01A	KIRC	<= 60	Male	Stage I	T1	NA	NA
TCGA-CZ-5465-01A-01R-1503-07	TCGA-CZ-5465-01A	KIRC	> 60	Female	Stage III	T3	M0	NA
TCGA-BP-4337-01A-01R-1289-07	TCGA-BP-4337-01A	KIRC	> 60	Female	Stage III	T3	M0	N0
TCGA-CJ-4886-01A-01R-1305-07	TCGA-CJ-4886-01A	KIRC	<= 60	Female	Stage I	T1	M0	NA
TCGA-B0-5699-01A-11R-1541-07	TCGA-B0-5699-01A	KIRC	<= 60	Male	Stage I	T1	M0	N0
TCGA-BP-4340-01A-01R-1289-07	TCGA-BP-4340-01A	KIRC	> 60	Female	Stage I	T1	M0	N0
TCGA-BP-4982-01A-01R-1334-07	TCGA-BP-4982-01A	KIRC	<= 60	Male	Stage I	T1	M0	NA
TCGA-B0-4827-01A-02R-1420-07	TCGA-B0-4827-01A	KIRC	> 60	Female	Stage III	T3	M0	N0
TCGA-CJ-4901-01A-01R-1426-07	TCGA-CJ-4901-01A	KIRC	<= 60	Male	Stage III	T3	M0	NA
TCGA-B0-4816-01A-01R-1503-07	TCGA-B0-4816-01A	KIRC	<= 60	Male	Stage II	T2	M0	N0
TCGA-B0-5080-01A-01R-1503-07	TCGA-B0-5080-01A	KIRC	> 60	Male	Stage IV	T3	M1	N0
TCGA-A3-3370-01A-02R-1420-07	TCGA-A3-3370-01A	KIRC	<= 60	Female	Stage I	T1	M0	N0
TCGA-MM-A564-01A-11R-A266-07	TCGA-MM-A564-01A	KIRC	> 60	Male	Stage II	T2	NA	NA
TCGA-CJ-4897-01A-03R-1426-07	TCGA-CJ-4897-01A	KIRC	> 60	Female	Stage III	T3	M0	NA
TCGA-G6-A8L7-01A-11R-A37O-07	TCGA-G6-A8L7-01A	KIRC	> 60	Female	Stage I	T1	NA	N0
TCGA-B8-5164-01A-01R-1420-07	TCGA-B8-5164-01A	KIRC	> 60	Male	Stage III	T3	M0	N0
TCGA-BP-4352-01A-01R-1289-07	TCGA-BP-4352-01A	KIRC	> 60	Female	Stage IV	T3	M1	N0
TCGA-CW-6093-01A-11R-1672-07	TCGA-CW-6093-01A	KIRC	> 60	Male	Stage I	T1	M0	NA
TCGA-BP-4804-01A-02R-1305-07	TCGA-BP-4804-01A	KIRC	<= 60	Male	Stage I	T1	M0	NA
TCGA-B0-4844-01A-01R-1277-07	TCGA-B0-4844-01A	KIRC	<= 60	Male	Stage IV	T3	M1	NA
TCGA-A3-3322-01A-02R-1325-07	TCGA-A3-3322-01A	KIRC	<= 60	Male	Stage I	T1	M0	NA
TCGA-B0-5120-01A-01R-1420-07	TCGA-B0-5120-01A	KIRC	> 60	Female	Stage I	T1	M0	N0
TCGA-MM-A84U-01A-11R-A37O-07	TCGA-MM-A84U-01A	KIRC	<= 60	Female	Stage I	T1	NA	NA
TCGA-DV-A4VX-01A-11R-A266-07	TCGA-DV-A4VX-01A	KIRC	<= 60	Male	Stage IV	T3	NA	N0
TCGA-AK-3443-01A-02R-1325-07	TCGA-AK-3443-01A	KIRC	<= 60	Male	Stage II	T2	M0	N0
TCGA-G6-A8L8-01A-21R-A37O-07	TCGA-G6-A8L8-01A	KIRC	> 60	Female	Stage I	T1	NA	NA
TCGA-CZ-5470-01A-01R-1503-07	TCGA-CZ-5470-01A	KIRC	> 60	Female	Stage II	T2	M0	N0
TCGA-B4-5843-01A-11R-1672-07	TCGA-B4-5843-01A	KIRC	<= 60	Male	Stage I	T1	M0	N0
TCGA-BP-5007-01A-01R-1334-07	TCGA-BP-5007-01A	KIRC	<= 60	Male	Stage II	T2	M0	N0
TCGA-B0-5102-01A-01R-1420-07	TCGA-B0-5102-01A	KIRC	> 60	Female	Stage I	T1	M0	NA
TCGA-AK-3465-01A-02R-1325-07	TCGA-AK-3465-01A	KIRC	> 60	Female	Stage I	T1	M0	NA
TCGA-B0-4824-01A-01R-1277-07	TCGA-B0-4824-01A	KIRC	<= 60	Female	Stage I	T1	M0	N0
TCGA-B0-4823-01A-02R-1420-07	TCGA-B0-4823-01A	KIRC	> 60	Male	Stage I	T1	M0	N0
TCGA-CJ-4902-01A-01R-1426-07	TCGA-CJ-4902-01A	KIRC	> 60	Male	Stage III	T3	M0	NA
TCGA-EU-5904-01A-11R-1672-07	TCGA-EU-5904-01A	KIRC	<= 60	Female	Stage I	T1	M0	NA
TCGA-CJ-4874-01A-01R-1305-07	TCGA-CJ-4874-01A	KIRC	> 60	Female	Stage I	T1	M0	N0
TCGA-BP-5190-01A-01R-1426-07	TCGA-BP-5190-01A	KIRC	> 60	Male	Stage I	T1	M0	NA
TCGA-3Z-A93Z-01A-11R-A37O-07	TCGA-3Z-A93Z-01A	KIRC	> 60	Male	Stage I	T1	M0	N0
TCGA-B0-4819-01A-01R-1277-07	TCGA-B0-4819-01A	KIRC	<= 60	Female	Stage IV	T3	M1	NA
TCGA-CZ-5458-01A-01R-1503-07	TCGA-CZ-5458-01A	KIRC	<= 60	Male	Stage III	T3	M0	NA
TCGA-CJ-4635-01A-02R-1305-07	TCGA-CJ-4635-01A	KIRC	<= 60	Male	Stage I	T1	M0	NA
TCGA-B0-5095-01A-01R-1420-07	TCGA-B0-5095-01A	KIRC	> 60	Male	Stage III	T3	M0	N0
TCGA-BP-5183-01A-01R-1426-07	TCGA-BP-5183-01A	KIRC	<= 60	Male	Stage III	T3	M0	NA
TCGA-A3-3306-01A-01R-0864-07	TCGA-A3-3306-01A	KIRC	> 60	Male	Stage I	T1	M0	N0
TCGA-B0-4836-01A-01R-1305-07	TCGA-B0-4836-01A	KIRC	> 60	Male	Stage IV	T3	M1	NA
TCGA-B0-4818-01A-01R-1503-07	TCGA-B0-4818-01A	KIRC	> 60	Female	Stage II	T2	M0	NA
TCGA-BP-4335-01A-01R-1289-07	TCGA-BP-4335-01A	KIRC	> 60	Female	Stage IV	T3	M1	N0
TCGA-CJ-4872-01A-01R-1305-07	TCGA-CJ-4872-01A	KIRC	<= 60	Male	Stage I	T1	M0	N0
TCGA-BP-4975-01A-01R-1334-07	TCGA-BP-4975-01A	KIRC	<= 60	Male	Stage I	T1	M0	NA
TCGA-BP-5192-01A-01R-1426-07	TCGA-BP-5192-01A	KIRC	<= 60	Male	Stage I	T1	M0	NA
TCGA-BP-4765-01A-01R-1289-07	TCGA-BP-4765-01A	KIRC	<= 60	Male	Stage I	T1	M0	NA
TCGA-BP-4766-01A-01R-1289-07	TCGA-BP-4766-01A	KIRC	<= 60	Female	Stage I	T1	M0	NA
TCGA-BP-4962-01A-01R-1334-07	TCGA-BP-4962-01A	KIRC	<= 60	Male	Stage II	T2	M0	NA
TCGA-BP-5000-01A-01R-1334-07	TCGA-BP-5000-01A	KIRC	<= 60	Male	Stage I	T1	M0	NA
TCGA-B0-4822-01A-01R-1277-07	TCGA-B0-4822-01A	KIRC	> 60	Male	Stage II	T2	M0	NA
TCGA-AK-3433-01A-02R-1277-07	TCGA-AK-3433-01A	KIRC	<= 60	Female	Stage II	T2	M0	N0
TCGA-BP-4985-01A-01R-1334-07	TCGA-BP-4985-01A	KIRC	> 60	Male	Stage III	T3	M0	N0
TCGA-A3-3324-01A-02R-1325-07	TCGA-A3-3324-01A	KIRC	<= 60	Male	Stage I	T1	M0	NA
TCGA-B8-5545-01A-01R-1672-07	TCGA-B8-5545-01A	KIRC	<= 60	Male	Stage I	T1	M0	N0
TCGA-CZ-5459-01A-01R-1503-07	TCGA-CZ-5459-01A	KIRC	> 60	Male	Stage III	T3	M0	NA
TCGA-GK-A6C7-01A-11R-A33J-07	TCGA-GK-A6C7-01A	KIRC	> 60	Female	Stage I	T1	NA	NA
TCGA-BP-5185-01A-01R-1426-07	TCGA-BP-5185-01A	KIRC	<= 60	Male	Stage I	T1	M0	NA
TCGA-BP-5196-01A-01R-1426-07	TCGA-BP-5196-01A	KIRC	<= 60	Male	Stage I	T1	M0	NA
TCGA-BP-4351-01A-01R-1289-07	TCGA-BP-4351-01A	KIRC	<= 60	Female	Stage III	T3	M0	N0
TCGA-CJ-4881-01A-01R-1305-07	TCGA-CJ-4881-01A	KIRC	<= 60	Male	Stage III	T3	M0	NA
TCGA-BP-4960-01A-01R-1334-07	TCGA-BP-4960-01A	KIRC	<= 60	Male	Stage II	T2	M0	N0
TCGA-B0-5692-01A-11R-1541-07	TCGA-B0-5692-01A	KIRC	> 60	Female	Stage III	T3	M0	N0
TCGA-AK-3427-01A-01R-0864-07	TCGA-AK-3427-01A	KIRC	> 60	Male	Stage I	T1	M0	N0
TCGA-B0-5694-01A-11R-1541-07	TCGA-B0-5694-01A	KIRC	> 60	Male	Stage III	T3	M0	N0
TCGA-DV-5566-01A-01R-1541-07	TCGA-DV-5566-01A	KIRC	> 60	Female	Stage I	T1	M0	NA
TCGA-B2-5635-01A-01R-1541-07	TCGA-B2-5635-01A	KIRC	> 60	Male	Stage I	T1	M0	NA
TCGA-CJ-4888-01A-01R-1305-07	TCGA-CJ-4888-01A	KIRC	<= 60	Male	Stage IV	T3	M1	NA
TCGA-B2-3923-01A-02R-1325-07	TCGA-B2-3923-01A	KIRC	<= 60	Male	Stage II	T2	M0	NA
TCGA-CJ-4638-01A-02R-1325-07	TCGA-CJ-4638-01A	KIRC	<= 60	Female	Stage IV	T3	M1	N1
TCGA-B0-4696-01A-01R-1277-07	TCGA-B0-4696-01A	KIRC	<= 60	Male	Stage III	T3	M0	N0
TCGA-B4-5835-01A-11R-1672-07	TCGA-B4-5835-01A	KIRC	> 60	Female	Stage I	T1	M0	N0
TCGA-CJ-4923-01A-01R-1426-07	TCGA-CJ-4923-01A	KIRC	> 60	Female	Stage IV	T3	M1	NA
TCGA-A3-3374-01A-02R-1325-07	TCGA-A3-3374-01A	KIRC	<= 60	Female	Stage I	T1	M0	N0
TCGA-CJ-4868-01A-01R-1305-07	TCGA-CJ-4868-01A	KIRC	<= 60	Male	Stage IV	T3	M1	N0
TCGA-A3-3311-01A-02R-1325-07	TCGA-A3-3311-01A	KIRC	<= 60	Male	Stage I	T1	M0	NA
TCGA-BP-5170-01A-01R-1426-07	TCGA-BP-5170-01A	KIRC	<= 60	Male	Stage I	T1	M0	NA
TCGA-BP-5182-01A-01R-1426-07	TCGA-BP-5182-01A	KIRC	<= 60	Male	Stage I	T1	M0	N0
TCGA-AK-3431-01A-02R-1277-07	TCGA-AK-3431-01A	KIRC	> 60	Female	Stage II	T2	M0	NA
TCGA-EU-5905-01A-11R-1672-07	TCGA-EU-5905-01A	KIRC	> 60	Female	Stage I	T1	M0	NA
TCGA-B2-3924-01A-02R-1325-07	TCGA-B2-3924-01A	KIRC	> 60	Male	Stage I	T1	M0	NA
TCGA-B0-4710-01A-01R-1503-07	TCGA-B0-4710-01A	KIRC	> 60	Female	Stage III	T3	M0	N0
TCGA-A3-3320-01A-02R-1325-07	TCGA-A3-3320-01A	KIRC	<= 60	Female	Stage I	T1	M0	NA
TCGA-BP-4346-01A-01R-1289-07	TCGA-BP-4346-01A	KIRC	<= 60	Male	Stage III	T3	M0	N0
TCGA-B4-5378-01A-01R-1503-07	TCGA-B4-5378-01A	KIRC	> 60	Male	Stage I	T1	M0	N0
TCGA-B8-5550-01A-01R-1541-07	TCGA-B8-5550-01A	KIRC	> 60	Male	Stage III	T3	M0	N0
TCGA-CZ-5466-01A-01R-1503-07	TCGA-CZ-5466-01A	KIRC	> 60	Male	Stage III	T3	M0	NA
TCGA-B0-5400-01A-01R-1503-07	TCGA-B0-5400-01A	KIRC	<= 60	Female	Stage III	T3	M0	N0
TCGA-A3-3363-01A-01R-0864-07	TCGA-A3-3363-01A	KIRC	<= 60	Male	Stage II	T2	M0	N0
TCGA-A3-3367-01A-02R-1420-07	TCGA-A3-3367-01A	KIRC	> 60	Male	Stage I	T1	M0	N0
TCGA-BP-4983-01A-01R-1334-07	TCGA-BP-4983-01A	KIRC	> 60	Female	Stage III	T3	M0	NA
TCGA-CJ-4920-01A-01R-1426-07	TCGA-CJ-4920-01A	KIRC	> 60	Female	Stage I	T1	M0	NA
TCGA-CW-5587-01A-01R-1541-07	TCGA-CW-5587-01A	KIRC	> 60	Female	Stage III	T3	M0	N0
TCGA-CZ-5464-01A-01R-1503-07	TCGA-CZ-5464-01A	KIRC	> 60	Male	Stage IV	T3	M1	NA
TCGA-B0-4718-01A-01R-1277-07	TCGA-B0-4718-01A	KIRC	<= 60	Male	Stage III	T3	M0	NA
TCGA-CJ-4634-01A-02R-1325-07	TCGA-CJ-4634-01A	KIRC	<= 60	Female	Stage I	T1	M0	NA
TCGA-CW-5588-01A-01R-1541-07	TCGA-CW-5588-01A	KIRC	> 60	Female	Stage I	T1	M0	NA
TCGA-CZ-4863-01A-01R-1503-07	TCGA-CZ-4863-01A	KIRC	<= 60	Female	Stage III	T3	M0	N0
TCGA-A3-3380-01A-01R-0864-07	TCGA-A3-3380-01A	KIRC	<= 60	Male	Stage I	T1	M0	N0
TCGA-CJ-5678-01A-11R-1541-07	TCGA-CJ-5678-01A	KIRC	> 60	Male	Stage IV	T2	M1	N0
TCGA-CZ-5468-01A-01R-1503-07	TCGA-CZ-5468-01A	KIRC	> 60	Male	Stage IV	T3	M1	NA
TCGA-CZ-5986-01A-11R-1672-07	TCGA-CZ-5986-01A	KIRC	> 60	Male	Stage I	T1	M0	N0
TCGA-B0-4691-01A-01R-1277-07	TCGA-B0-4691-01A	KIRC	<= 60	Male	Stage IV	T2	M1	N0
TCGA-AK-3428-01A-02R-1277-07	TCGA-AK-3428-01A	KIRC	> 60	Male	Stage III	T3	M0	N0
TCGA-A3-3387-01A-01R-1541-07	TCGA-A3-3387-01A	KIRC	<= 60	Male	Stage I	T1	M0	N0
TCGA-A3-A6NJ-01A-12R-A33J-07	TCGA-A3-A6NJ-01A	KIRC	<= 60	Female	Stage I	T1	NA	NA
TCGA-BP-4756-01A-01R-1289-07	TCGA-BP-4756-01A	KIRC	> 60	Female	Stage I	T1	M0	N0
TCGA-BP-5198-01A-01R-1426-07	TCGA-BP-5198-01A	KIRC	> 60	Male	Stage III	T3	M0	N0
TCGA-CJ-4899-01A-01R-1334-07	TCGA-CJ-4899-01A	KIRC	<= 60	Male	Stage I	T1	M0	NA
TCGA-B8-4153-01B-11R-1672-07	TCGA-B8-4153-01B	KIRC	> 60	Male	Stage III	T3	M0	NA
TCGA-B0-5100-01A-01R-1420-07	TCGA-B0-5100-01A	KIRC	> 60	Male	Stage III	T3	M0	NA
TCGA-B0-4849-01A-01R-1277-07	TCGA-B0-4849-01A	KIRC	<= 60	Male	Stage III	T3	M0	NA
TCGA-MW-A4EC-01A-11R-A266-07	TCGA-MW-A4EC-01A	KIRC	> 60	Female	Stage I	T1	NA	NA
TCGA-A3-3331-01A-02R-1325-07	TCGA-A3-3331-01A	KIRC	> 60	Female	Stage I	T1	M0	N0
TCGA-CJ-4912-01A-01R-1426-07	TCGA-CJ-4912-01A	KIRC	> 60	Male	Stage II	T2	M0	NA
TCGA-B8-4622-01A-02R-1277-07	TCGA-B8-4622-01A	KIRC	<= 60	Male	Stage IV	T3	M1	N0
TCGA-BP-4992-01A-01R-1334-07	TCGA-BP-4992-01A	KIRC	> 60	Male	Stage I	T1	M0	NA
TCGA-BP-4776-01A-01R-1289-07	TCGA-BP-4776-01A	KIRC	<= 60	Male	Stage I	T1	M0	NA
TCGA-A3-A8CQ-01A-11R-A37O-07	TCGA-A3-A8CQ-01A	KIRC	<= 60	Female	Stage I	T1	NA	NA
TCGA-B8-5159-01A-01R-1420-07	TCGA-B8-5159-01A	KIRC	> 60	Female	Stage I	T1	M0	N0
TCGA-B8-4151-01A-01R-1188-07	TCGA-B8-4151-01A	KIRC	<= 60	Female	Stage III	T3	M0	N0
TCGA-BP-5008-01A-01R-1334-07	TCGA-BP-5008-01A	KIRC	<= 60	Male	Stage I	T1	M0	NA
TCGA-BP-4987-01A-01R-1334-07	TCGA-BP-4987-01A	KIRC	<= 60	Female	Stage I	T1	M0	NA
TCGA-CW-6087-01A-11R-1672-07	TCGA-CW-6087-01A	KIRC	> 60	Male	Stage IV	T3	M1	N1
TCGA-BP-5173-01A-01R-1426-07	TCGA-BP-5173-01A	KIRC	> 60	Male	Stage I	T1	M0	NA
TCGA-B0-5709-01A-11R-1541-07	TCGA-B0-5709-01A	KIRC	> 60	Female	Stage III	T3	M0	NA
TCGA-AK-3445-01A-02R-1277-07	TCGA-AK-3445-01A	KIRC	> 60	Male	Stage III	T3	M0	NA
TCGA-BP-5180-01A-01R-1426-07	TCGA-BP-5180-01A	KIRC	<= 60	Male	Stage I	T1	M0	NA
TCGA-B0-5092-01A-01R-1420-07	TCGA-B0-5092-01A	KIRC	<= 60	Female	Stage IV	T1	M1	N0
TCGA-B4-5377-01A-01R-1503-07	TCGA-B4-5377-01A	KIRC	> 60	Female	Stage IV	T3	M1	N0
TCGA-CZ-4857-01A-01R-1305-07	TCGA-CZ-4857-01A	KIRC	<= 60	Male	Stage IV	T3	M1	N0
TCGA-B8-4146-01B-11R-1672-07	TCGA-B8-4146-01B	KIRC	<= 60	Female	Stage I	T1	M0	NA
TCGA-BP-4974-01A-01R-1334-07	TCGA-BP-4974-01A	KIRC	<= 60	Male	Stage IV	T3	M1	N0
TCGA-BP-5001-01A-01R-1334-07	TCGA-BP-5001-01A	KIRC	<= 60	Female	Stage I	T1	M0	NA
TCGA-6D-AA2E-01A-11R-A37O-07	TCGA-6D-AA2E-01A	KIRC	> 60	Female	Stage I	T1	NA	NA
TCGA-AK-3458-01A-01R-1503-07	TCGA-AK-3458-01A	KIRC	<= 60	Male	Stage I	T1	M0	NA
TCGA-T7-A92I-01A-11R-A37O-07	TCGA-T7-A92I-01A	KIRC	<= 60	Female	Stage I	T1	NA	NA
TCGA-B8-5163-01A-01R-1420-07	TCGA-B8-5163-01A	KIRC	> 60	Female	Stage III	T3	M0	N0
TCGA-BP-4161-01A-02R-1325-07	TCGA-BP-4161-01A	KIRC	> 60	Male	Stage I	T1	M0	NA
TCGA-BP-4769-01A-01R-1289-07	TCGA-BP-4769-01A	KIRC	> 60	Male	Stage I	T1	M0	NA
TCGA-BP-4763-01A-01R-1289-07	TCGA-BP-4763-01A	KIRC	> 60	Female	Stage I	T1	M0	NA
TCGA-A3-3323-01A-02R-1325-07	TCGA-A3-3323-01A	KIRC	<= 60	Male	Stage I	T1	M0	NA
TCGA-B8-5158-01A-01R-1420-07	TCGA-B8-5158-01A	KIRC	<= 60	Male	Stage III	T3	M0	N1
TCGA-BP-4167-01A-02R-1325-07	TCGA-BP-4167-01A	KIRC	<= 60	Male	Stage III	T3	M0	NA
TCGA-AS-3777-01A-01R-0864-07	TCGA-AS-3777-01A	KIRC	> 60	Male	Stage I	T1	M0	NA
TCGA-BP-4163-01A-02R-1325-07	TCGA-BP-4163-01A	KIRC	<= 60	Female	Stage III	T3	M0	N0
TCGA-A3-3351-01A-02R-1325-07	TCGA-A3-3351-01A	KIRC	<= 60	Male	Stage II	T2	M0	N0
TCGA-BP-4355-01A-01R-1289-07	TCGA-BP-4355-01A	KIRC	<= 60	Female	Stage III	T3	M0	NA
TCGA-B0-5084-01A-01R-1334-07	TCGA-B0-5084-01A	KIRC	<= 60	Male	Stage IV	T3	M1	N1
TCGA-CZ-5457-01A-01R-1503-07	TCGA-CZ-5457-01A	KIRC	> 60	Male	Stage III	T3	M0	NA
TCGA-BP-5200-01A-01R-1426-07	TCGA-BP-5200-01A	KIRC	<= 60	Male	Stage II	T2	M0	NA
TCGA-AK-3453-01A-02R-1277-07	TCGA-AK-3453-01A	KIRC	<= 60	Female	Stage II	T2	M0	NA
TCGA-BP-4330-01A-01R-1289-07	TCGA-BP-4330-01A	KIRC	<= 60	Female	Stage III	T3	M0	N0
TCGA-BP-4349-01A-01R-1289-07	TCGA-BP-4349-01A	KIRC	> 60	Female	Stage I	T1	M0	NA
TCGA-CJ-4889-01A-01R-1305-07	TCGA-CJ-4889-01A	KIRC	> 60	Female	Stage I	T1	M0	NA
TCGA-B0-5104-01A-01R-1420-07	TCGA-B0-5104-01A	KIRC	> 60	Female	Stage I	T1	M0	N0
TCGA-BP-5186-01A-01R-1426-07	TCGA-BP-5186-01A	KIRC	<= 60	Female	Stage I	T1	M0	N0
TCGA-CJ-4907-01A-01R-1426-07	TCGA-CJ-4907-01A	KIRC	<= 60	Male	Stage III	T3	M0	NA
TCGA-CJ-4639-01A-02R-1325-07	TCGA-CJ-4639-01A	KIRC	<= 60	Female	Stage II	T2	M0	N0
TCGA-BP-4969-01A-01R-1334-07	TCGA-BP-4969-01A	KIRC	> 60	Female	Stage I	T1	M0	NA
TCGA-A3-3373-01A-02R-1420-07	TCGA-A3-3373-01A	KIRC	<= 60	Female	Stage I	T1	M0	N0
TCGA-BP-4169-01A-02R-1289-07	TCGA-BP-4169-01A	KIRC	> 60	Female	Stage II	T2	M0	N0
TCGA-B0-4837-01A-01R-1305-07	TCGA-B0-4837-01A	KIRC	> 60	Male	Stage I	T1	M0	N0
TCGA-B0-5706-01A-11R-1541-07	TCGA-B0-5706-01A	KIRC	<= 60	Male	Stage II	T2	M0	N0
TCGA-A3-3347-01A-02R-1325-07	TCGA-A3-3347-01A	KIRC	> 60	Female	Stage III	T1	M0	N1
TCGA-BP-4165-01A-02R-1289-07	TCGA-BP-4165-01A	KIRC	> 60	Female	Stage I	T1	M0	N0
TCGA-B0-5113-01A-01R-1420-07	TCGA-B0-5113-01A	KIRC	> 60	Female	Stage III	T3	M0	N0
TCGA-BP-4338-01A-01R-1289-07	TCGA-BP-4338-01A	KIRC	<= 60	Male	Stage I	T1	M0	N0
TCGA-B0-4810-01A-01R-1503-07	TCGA-B0-4810-01A	KIRC	<= 60	Male	Stage III	T3	M0	N1
TCGA-BP-4173-01A-02R-1289-07	TCGA-BP-4173-01A	KIRC	<= 60	Male	Stage II	T2	M0	N0
TCGA-B8-A54F-01A-11R-A266-07	TCGA-B8-A54F-01A	KIRC	<= 60	Female	Stage I	T1	NA	NA
TCGA-B8-A54E-01A-11R-A266-07	TCGA-B8-A54E-01A	KIRC	> 60	Female	Stage I	T1	NA	NA
TCGA-BP-4784-01A-01R-1305-07	TCGA-BP-4784-01A	KIRC	> 60	Female	Stage I	T1	M0	NA
TCGA-B0-5121-01A-02R-1420-07	TCGA-B0-5121-01A	KIRC	<= 60	Male	Stage I	T1	M0	N0
TCGA-B0-5085-01A-01R-1334-07	TCGA-B0-5085-01A	KIRC	> 60	Female	Stage III	T3	M0	N0
TCGA-B0-5107-01A-01R-1420-07	TCGA-B0-5107-01A	KIRC	> 60	Female	Stage IV	T2	M1	N0
TCGA-CJ-4637-01A-02R-1325-07	TCGA-CJ-4637-01A	KIRC	<= 60	Female	Stage IV	T2	M1	NA
TCGA-BP-4170-01A-02R-1289-07	TCGA-BP-4170-01A	KIRC	> 60	Female	Stage I	T1	M0	N0
TCGA-B8-4619-01A-02R-1325-07	TCGA-B8-4619-01A	KIRC	<= 60	Male	Stage I	T1	M0	N0
TCGA-B0-5711-01A-11R-1672-07	TCGA-B0-5711-01A	KIRC	<= 60	Male	Stage III	T3	M0	NA
TCGA-B4-5832-01A-11R-1672-07	TCGA-B4-5832-01A	KIRC	> 60	Male	Stage III	T3	M0	N0
TCGA-CZ-4853-01A-01R-1426-07	TCGA-CZ-4853-01A	KIRC	> 60	Male	Stage I	T1	M0	NA
TCGA-A3-3346-01A-01R-1766-07	TCGA-A3-3346-01A	KIRC	> 60	Male	Stage I	T1	M0	NA
TCGA-BP-4341-01A-01R-1289-07	TCGA-BP-4341-01A	KIRC	> 60	Male	Stage III	T3	M0	NA
TCGA-BP-5177-01A-01R-1426-07	TCGA-BP-5177-01A	KIRC	<= 60	Female	Stage I	T1	M0	NA
TCGA-B8-4154-01A-01R-1188-07	TCGA-B8-4154-01A	KIRC	> 60	Female	Stage I	T1	M0	N0
TCGA-B0-4713-01A-01R-1277-07	TCGA-B0-4713-01A	KIRC	> 60	Female	Stage III	T3	M0	NA
TCGA-BP-4798-01A-01R-1305-07	TCGA-BP-4798-01A	KIRC	> 60	Male	NA	T3	M1	N0
TCGA-CZ-5982-01A-11R-1672-07	TCGA-CZ-5982-01A	KIRC	<= 60	Female	Stage I	T1	M0	NA
TCGA-B0-4834-01A-01R-1305-07	TCGA-B0-4834-01A	KIRC	<= 60	Male	Stage I	T1	M0	N0
TCGA-B0-5117-01A-01R-1420-07	TCGA-B0-5117-01A	KIRC	<= 60	Male	Stage I	T1	M0	NA
TCGA-B0-5710-01A-11R-1672-07	TCGA-B0-5710-01A	KIRC	<= 60	Male	Stage I	T1	M0	N0
TCGA-CZ-5467-01A-01R-1503-07	TCGA-CZ-5467-01A	KIRC	> 60	Female	Stage III	T3	M0	N0
TCGA-BP-4770-01A-01R-1503-07	TCGA-BP-4770-01A	KIRC	> 60	Female	Stage IV	T4	M0	N0
TCGA-CJ-4887-01A-01R-1305-07	TCGA-CJ-4887-01A	KIRC	<= 60	Male	Stage IV	T3	M1	NA
TCGA-AK-3426-01A-02R-1325-07	TCGA-AK-3426-01A	KIRC	<= 60	Male	Stage III	T3	M0	N1
TCGA-BP-4970-01A-01R-1334-07	TCGA-BP-4970-01A	KIRC	<= 60	Male	Stage III	T1	M0	N1
TCGA-CJ-5675-01A-11R-1541-07	TCGA-CJ-5675-01A	KIRC	> 60	Male	Stage II	T2	M0	NA
TCGA-BP-4963-01A-01R-1334-07	TCGA-BP-4963-01A	KIRC	> 60	Male	Stage I	T1	M0	NA
TCGA-A3-3362-01A-02R-1325-07	TCGA-A3-3362-01A	KIRC	<= 60	Female	Stage I	T1	M0	N0
TCGA-B2-4101-01A-02R-1277-07	TCGA-B2-4101-01A	KIRC	<= 60	Male	Stage II	T2	M0	NA
TCGA-B0-4703-01A-01R-1277-07	TCGA-B0-4703-01A	KIRC	<= 60	Male	Stage IV	T3	M1	N0
TCGA-BP-4961-01A-01R-1334-07	TCGA-BP-4961-01A	KIRC	<= 60	Male	Stage I	T1	M0	NA
TCGA-BP-4981-01A-01R-1334-07	TCGA-BP-4981-01A	KIRC	> 60	Female	Stage III	T3	M0	NA
TCGA-CJ-5677-01A-11R-1541-07	TCGA-CJ-5677-01A	KIRC	<= 60	Female	Stage IV	T3	M1	NA
TCGA-B0-4693-01A-01R-1277-07	TCGA-B0-4693-01A	KIRC	> 60	Female	Stage III	T3	M0	N0
TCGA-BP-4971-01A-01R-1334-07	TCGA-BP-4971-01A	KIRC	<= 60	Male	Stage III	T3	M0	N0
TCGA-B0-4833-01A-01R-1305-07	TCGA-B0-4833-01A	KIRC	> 60	Female	Stage I	T1	M0	N0
TCGA-B2-5636-01A-02R-1541-07	TCGA-B2-5636-01A	KIRC	> 60	Male	Stage I	T1	M0	NA
TCGA-BP-4332-01A-01R-1289-07	TCGA-BP-4332-01A	KIRC	<= 60	Male	Stage III	T3	M0	N0
TCGA-CJ-5672-01A-11R-1541-07	TCGA-CJ-5672-01A	KIRC	> 60	Male	Stage I	T1	M0	NA
TCGA-B0-4838-01A-01R-1305-07	TCGA-B0-4838-01A	KIRC	> 60	Female	Stage I	T1	M0	N0
TCGA-CJ-6031-01A-11R-1672-07	TCGA-CJ-6031-01A	KIRC	<= 60	Male	Stage I	T1	M0	NA
TCGA-B2-A4SR-01A-11R-A266-07	TCGA-B2-A4SR-01A	KIRC	> 60	Male	Stage II	T2	M0	NA
TCGA-B0-5110-01A-01R-1420-07	TCGA-B0-5110-01A	KIRC	> 60	Female	Stage I	T1	M0	N0
TCGA-B0-5077-01A-01R-1334-07	TCGA-B0-5077-01A	KIRC	> 60	Male	Stage I	T1	M0	N0
TCGA-B0-4843-01A-01R-1277-07	TCGA-B0-4843-01A	KIRC	<= 60	Male	Stage III	T3	M0	N0
TCGA-B0-4688-01A-01R-1277-07	TCGA-B0-4688-01A	KIRC	<= 60	Male	Stage IV	T4	M1	N0
TCGA-CW-5585-01A-01R-1541-07	TCGA-CW-5585-01A	KIRC	<= 60	Male	Stage IV	T3	M1	N0
TCGA-B0-4694-01A-01R-1277-07	TCGA-B0-4694-01A	KIRC	> 60	Male	Stage III	T3	M0	NA
TCGA-B0-5696-01A-11R-1541-07	TCGA-B0-5696-01A	KIRC	> 60	Male	Stage III	T3	M0	N0
TCGA-BP-4968-01A-01R-1334-07	TCGA-BP-4968-01A	KIRC	<= 60	Male	Stage I	T1	M0	N0
TCGA-BP-5175-01A-01R-1426-07	TCGA-BP-5175-01A	KIRC	<= 60	Male	Stage I	T1	M0	NA
TCGA-BP-4967-01A-01R-1334-07	TCGA-BP-4967-01A	KIRC	> 60	Male	Stage III	T3	M0	N0
TCGA-BP-4761-01A-01R-1289-07	TCGA-BP-4761-01A	KIRC	<= 60	Male	Stage III	T3	M0	N1
TCGA-G6-A8L6-01A-11R-A37O-07	TCGA-G6-A8L6-01A	KIRC	<= 60	Male	Stage IV	T2	NA	NA
TCGA-CZ-5461-01A-01R-1503-07	TCGA-CZ-5461-01A	KIRC	<= 60	Male	Stage IV	T1	M1	NA
TCGA-EU-5907-01A-11R-1672-07	TCGA-EU-5907-01A	KIRC	> 60	Male	Stage III	T3	M0	NA
TCGA-B0-5098-01A-01R-1420-07	TCGA-B0-5098-01A	KIRC	<= 60	Female	Stage I	T1	M0	NA
TCGA-BP-4959-01A-01R-1334-07	TCGA-BP-4959-01A	KIRC	<= 60	Male	Stage I	T1	M0	NA
TCGA-B0-4811-01A-01R-1503-07	TCGA-B0-4811-01A	KIRC	<= 60	Male	Stage III	T3	M0	N0
TCGA-B0-5081-01A-01R-1334-07	TCGA-B0-5081-01A	KIRC	> 60	Female	Stage III	T3	M0	N0
TCGA-BP-4998-01A-01R-1334-07	TCGA-BP-4998-01A	KIRC	<= 60	Male	Stage I	T1	M0	NA
TCGA-CZ-5453-01A-01R-1503-07	TCGA-CZ-5453-01A	KIRC	> 60	Male	Stage II	T2	M0	NA
TCGA-BP-5194-01A-02R-1426-07	TCGA-BP-5194-01A	KIRC	<= 60	Male	Stage I	T1	M0	NA
TCGA-EU-5906-01A-11R-1672-07	TCGA-EU-5906-01A	KIRC	<= 60	Male	Stage I	T1	M0	NA
TCGA-CJ-5680-01A-11R-1541-07	TCGA-CJ-5680-01A	KIRC	> 60	Female	Stage IV	T3	M1	NA
TCGA-B4-5838-01A-11R-1672-07	TCGA-B4-5838-01A	KIRC	<= 60	Male	NA	T3	M0	N1
TCGA-B0-4701-01A-01R-1277-07	TCGA-B0-4701-01A	KIRC	> 60	Female	Stage IV	T3	M1	N0
TCGA-BP-4326-01A-01R-1289-07	TCGA-BP-4326-01A	KIRC	<= 60	Female	Stage I	T1	M0	N0
TCGA-BP-4329-01A-02R-1289-07	TCGA-BP-4329-01A	KIRC	> 60	Male	Stage III	T3	M0	N0
TCGA-B0-5702-01A-11R-1541-07	TCGA-B0-5702-01A	KIRC	> 60	Male	Stage I	T1	M0	N0
TCGA-B0-4847-01A-01R-1277-07	TCGA-B0-4847-01A	KIRC	<= 60	Male	Stage IV	T3	M1	NA
TCGA-CJ-4878-01A-01R-1305-07	TCGA-CJ-4878-01A	KIRC	> 60	Female	Stage III	T3	M0	NA
TCGA-BP-4781-01A-01R-1305-07	TCGA-BP-4781-01A	KIRC	> 60	Male	Stage I	T1	M0	NA
TCGA-CW-5580-01A-01R-1672-07	TCGA-CW-5580-01A	KIRC	> 60	Female	Stage IV	T3	M1	NA
TCGA-CJ-4875-01A-01R-1305-07	TCGA-CJ-4875-01A	KIRC	> 60	Male	Stage IV	T3	M1	NA
TCGA-BP-4345-01A-01R-1289-07	TCGA-BP-4345-01A	KIRC	> 60	Male	Stage III	T3	M0	N0
TCGA-B8-A54D-01A-21R-A266-07	TCGA-B8-A54D-01A	KIRC	> 60	Male	Stage III	T3	NA	NA
TCGA-BP-5176-01A-01R-1426-07	TCGA-BP-5176-01A	KIRC	> 60	Female	Stage I	T1	M0	NA
TCGA-B0-5094-01A-01R-1420-07	TCGA-B0-5094-01A	KIRC	> 60	Male	Stage IV	T3	M1	N0
TCGA-BP-4789-01A-01R-1305-07	TCGA-BP-4789-01A	KIRC	<= 60	Male	Stage I	T1	M0	NA
TCGA-B8-5549-01A-01R-1541-07	TCGA-B8-5549-01A	KIRC	<= 60	Male	Stage I	T1	M0	N0
TCGA-CJ-5684-01A-11R-1541-07	TCGA-CJ-5684-01A	KIRC	> 60	Male	Stage III	T3	M0	NA
TCGA-CJ-4644-01A-02R-1325-07	TCGA-CJ-4644-01A	KIRC	<= 60	Female	Stage IV	T3	M1	N0
TCGA-CW-5590-01A-01R-1541-07	TCGA-CW-5590-01A	KIRC	<= 60	Male	Stage IV	T3	M1	NA
TCGA-BP-4801-01A-02R-1420-07	TCGA-BP-4801-01A	KIRC	<= 60	Male	Stage I	T1	M0	NA
TCGA-BP-4774-01A-01R-1289-07	TCGA-BP-4774-01A	KIRC	<= 60	Female	Stage I	T1	M0	NA
TCGA-B4-5844-01A-11R-1672-07	TCGA-B4-5844-01A	KIRC	> 60	Female	Stage II	T2	M0	N0
TCGA-CJ-4895-01A-01R-1305-07	TCGA-CJ-4895-01A	KIRC	> 60	Male	Stage IV	T3	M1	NA
TCGA-B0-4699-01A-01R-1277-07	TCGA-B0-4699-01A	KIRC	> 60	Male	Stage IV	T4	M1	N0
TCGA-CJ-6032-01A-11R-1672-07	TCGA-CJ-6032-01A	KIRC	> 60	Female	Stage II	T2	M0	NA
TCGA-BP-5202-01A-02R-1426-07	TCGA-BP-5202-01A	KIRC	> 60	Male	Stage III	T3	M0	NA
TCGA-B0-4817-01A-01R-1277-07	TCGA-B0-4817-01A	KIRC	> 60	Male	Stage III	T3	M0	N0
TCGA-B0-4845-01A-01R-1277-07	TCGA-B0-4845-01A	KIRC	> 60	Male	Stage IV	T3	M1	NA
TCGA-B0-5713-01A-11R-1672-07	TCGA-B0-5713-01A	KIRC	> 60	Female	Stage III	T3	M0	N0
TCGA-BP-4977-01A-01R-1334-07	TCGA-BP-4977-01A	KIRC	<= 60	Male	Stage I	T1	M0	NA
TCGA-B0-4846-01A-01R-1277-07	TCGA-B0-4846-01A	KIRC	<= 60	Male	Stage IV	T3	M1	N0
TCGA-B8-4143-01A-01R-1188-07	TCGA-B8-4143-01A	KIRC	> 60	Female	Stage IV	T3	M1	N0
TCGA-BP-4964-01A-01R-1334-07	TCGA-BP-4964-01A	KIRC	<= 60	Female	Stage I	T1	M0	N0
TCGA-B0-5697-01A-11R-1541-07	TCGA-B0-5697-01A	KIRC	<= 60	Male	Stage I	T1	M0	N0
TCGA-CJ-4876-01A-01R-1305-07	TCGA-CJ-4876-01A	KIRC	<= 60	Male	Stage II	T2	M0	N0
TCGA-BP-4797-01A-01R-1305-07	TCGA-BP-4797-01A	KIRC	<= 60	Male	Stage III	T3	M0	N0
TCGA-B0-5106-01A-01R-1420-07	TCGA-B0-5106-01A	KIRC	> 60	Male	Stage I	T1	M0	N0
TCGA-CZ-5988-01A-11R-1672-07	TCGA-CZ-5988-01A	KIRC	<= 60	Male	Stage I	T1	M0	N0
TCGA-CZ-5452-01A-01R-1503-07	TCGA-CZ-5452-01A	KIRC	> 60	Male	Stage II	T2	M0	N0
TCGA-B8-A54G-01A-11R-A266-07	TCGA-B8-A54G-01A	KIRC	<= 60	Male	Stage I	T1	NA	NA
TCGA-CW-5591-01A-01R-1541-07	TCGA-CW-5591-01A	KIRC	<= 60	Male	Stage IV	T3	M1	N0
TCGA-CJ-4885-01A-01R-1305-07	TCGA-CJ-4885-01A	KIRC	> 60	Male	Stage IV	T3	M1	NA
TCGA-B2-3923-01B-10R-A277-07	TCGA-B2-3923-01B	KIRC	<= 60	Male	Stage II	T2	M0	NA
TCGA-CJ-5686-01A-11R-1672-07	TCGA-CJ-5686-01A	KIRC	<= 60	Female	Stage I	T1	M0	NA
TCGA-AK-3461-01A-02R-1277-07	TCGA-AK-3461-01A	KIRC	> 60	Male	Stage I	T1	M0	NA
TCGA-B8-5551-01A-01R-1541-07	TCGA-B8-5551-01A	KIRC	> 60	Female	Stage I	T1	M0	N0
TCGA-B0-4842-01A-02R-1420-07	TCGA-B0-4842-01A	KIRC	> 60	Female	Stage III	T3	M0	N0
TCGA-B0-5707-01A-11R-1541-07	TCGA-B0-5707-01A	KIRC	<= 60	Female	Stage I	T1	M0	N0
TCGA-B0-4697-01A-01R-1277-07	TCGA-B0-4697-01A	KIRC	<= 60	Female	Stage IV	T3	M1	NA
TCGA-A3-3349-01A-01R-1188-07	TCGA-A3-3349-01A	KIRC	<= 60	Female	Stage I	T1	M0	N0
TCGA-B0-4848-01A-01R-1277-07	TCGA-B0-4848-01A	KIRC	<= 60	Male	Stage III	T3	M0	NA
TCGA-A3-3326-01A-01R-0864-07	TCGA-A3-3326-01A	KIRC	<= 60	Male	Stage I	T1	M0	NA
TCGA-BP-4803-01A-01R-1305-07	TCGA-BP-4803-01A	KIRC	> 60	Male	Stage III	T3	M0	NA
TCGA-CJ-5676-01A-11R-1541-07	TCGA-CJ-5676-01A	KIRC	<= 60	Male	Stage III	T3	M0	NA
TCGA-CJ-5681-01A-11R-1541-07	TCGA-CJ-5681-01A	KIRC	<= 60	Female	Stage IV	T3	M1	NA
TCGA-G6-A5PC-01A-11R-A33J-07	TCGA-G6-A5PC-01A	KIRC	<= 60	Female	Stage IV	T1	M1	N0
TCGA-B8-A54H-01A-11R-A33J-07	TCGA-B8-A54H-01A	KIRC	> 60	Female	Stage II	T2	NA	N0
TCGA-CJ-5679-01A-11R-1541-07	TCGA-CJ-5679-01A	KIRC	> 60	Male	Stage III	T3	M0	NA
TCGA-CW-5581-01A-02R-1541-07	TCGA-CW-5581-01A	KIRC	<= 60	Male	Stage I	T1	M0	NA
TCGA-B0-4839-01A-01R-1305-07	TCGA-B0-4839-01A	KIRC	> 60	Female	Stage I	T1	M0	N0
TCGA-CJ-4916-01A-01R-1426-07	TCGA-CJ-4916-01A	KIRC	> 60	Female	Stage III	T3	M0	NA
TCGA-B2-3924-01A-02R-A277-07	TCGA-B2-3924-01A	KIRC	> 60	Male	Stage I	T1	M0	NA
TCGA-A3-3385-01A-02R-1420-07	TCGA-A3-3385-01A	KIRC	<= 60	Female	Stage I	T1	M0	N0
TCGA-B0-5075-01A-01R-1334-07	TCGA-B0-5075-01A	KIRC	> 60	Female	Stage III	T3	M0	N0
TCGA-A3-A6NL-01A-11R-A33J-07	TCGA-A3-A6NL-01A	KIRC	<= 60	Female	Stage I	T1	NA	NA
TCGA-CJ-4873-01A-01R-1305-07	TCGA-CJ-4873-01A	KIRC	> 60	Female	Stage III	T3	M0	N0
TCGA-CW-5589-01A-01R-1541-07	TCGA-CW-5589-01A	KIRC	<= 60	Male	Stage I	T1	M0	NA
TCGA-CJ-6033-01A-11R-1672-07	TCGA-CJ-6033-01A	KIRC	<= 60	Female	Stage IV	T3	M1	N0
TCGA-CJ-4884-01A-01R-1305-07	TCGA-CJ-4884-01A	KIRC	> 60	Female	Stage III	T3	M0	NA
TCGA-CJ-4890-01A-01R-1305-07	TCGA-CJ-4890-01A	KIRC	> 60	Male	Stage IV	T3	M1	N0
TCGA-BP-4787-01A-01R-1305-07	TCGA-BP-4787-01A	KIRC	<= 60	Female	Stage IV	T3	M1	N0
TCGA-CZ-5455-01A-01R-1503-07	TCGA-CZ-5455-01A	KIRC	> 60	Male	Stage IV	T3	M1	NA
TCGA-B8-5553-01A-01R-1541-07	TCGA-B8-5553-01A	KIRC	> 60	Female	Stage I	T1	M0	N0
TCGA-CJ-4892-01A-01R-1305-07	TCGA-CJ-4892-01A	KIRC	> 60	Female	Stage I	T1	M0	N0
TCGA-CW-5583-01A-02R-1541-07	TCGA-CW-5583-01A	KIRC	<= 60	Female	Stage I	T1	M0	NA
TCGA-CJ-4870-01A-01R-1305-07	TCGA-CJ-4870-01A	KIRC	<= 60	Female	Stage III	T3	M0	NA
TCGA-B0-5083-01A-02R-1420-07	TCGA-B0-5083-01A	KIRC	> 60	Male	Stage I	T1	M0	N0
TCGA-B0-4852-01A-01R-1503-07	TCGA-B0-4852-01A	KIRC	> 60	Female	Stage II	T2	M0	N0
TCGA-AS-3778-01A-01R-A32Z-07	TCGA-AS-3778-01A	KIRC	<= 60	Male	Stage I	T1	M0	NA
TCGA-BP-4768-01A-01R-1289-07	TCGA-BP-4768-01A	KIRC	> 60	Female	Stage I	T1	M0	N0
TCGA-A3-3317-01A-02R-1325-07	TCGA-A3-3317-01A	KIRC	> 60	Male	Stage II	T2	M0	N0
TCGA-CJ-5671-01A-11R-1541-07	TCGA-CJ-5671-01A	KIRC	<= 60	Male	Stage I	T1	M0	NA
TCGA-B0-5701-01A-11R-1541-07	TCGA-B0-5701-01A	KIRC	> 60	Male	Stage III	T3	M0	N0
TCGA-CZ-5451-01A-01R-1503-07	TCGA-CZ-5451-01A	KIRC	> 60	Male	Stage II	T2	M0	N0
TCGA-B2-5641-01A-01R-1541-07	TCGA-B2-5641-01A	KIRC	> 60	Male	Stage I	T1	M0	N0
TCGA-B0-5097-01A-01R-1420-07	TCGA-B0-5097-01A	KIRC	<= 60	Female	Stage III	T3	M0	N0
TCGA-B0-5099-01A-01R-1420-07	TCGA-B0-5099-01A	KIRC	> 60	Female	Stage III	T3	M0	NA
TCGA-BP-4343-01A-02R-1289-07	TCGA-BP-4343-01A	KIRC	> 60	Male	Stage III	T3	M0	N0
TCGA-A3-A8OX-01A-11R-A37O-07	TCGA-A3-A8OX-01A	KIRC	> 60	Female	Stage I	T1	NA	NA
TCGA-A3-3313-01A-02R-1325-07	TCGA-A3-3313-01A	KIRC	<= 60	Male	Stage I	T1	M0	N0
TCGA-A3-A6NN-01A-12R-A33J-07	TCGA-A3-A6NN-01A	KIRC	> 60	Male	Stage I	T1	NA	NA
TCGA-BP-4162-01A-02R-1325-07	TCGA-BP-4162-01A	KIRC	> 60	Female	Stage I	T1	M0	N0
TCGA-BP-5174-01A-01R-1426-07	TCGA-BP-5174-01A	KIRC	<= 60	Female	Stage I	T1	M0	NA
TCGA-A3-3372-01A-02R-1325-07	TCGA-A3-3372-01A	KIRC	> 60	Male	Stage III	T3	M0	NA
TCGA-B2-3923-01A-02R-A277-07	TCGA-B2-3923-01A	KIRC	<= 60	Male	Stage II	T2	M0	NA
TCGA-B8-A54J-01A-11R-A33J-07	TCGA-B8-A54J-01A	KIRC	<= 60	Male	Stage II	T2	NA	NA
TCGA-A3-3365-01A-01R-0864-07	TCGA-A3-3365-01A	KIRC	<= 60	Male	Stage I	T1	M0	NA
TCGA-A3-3319-01A-02R-1325-07	TCGA-A3-3319-01A	KIRC	> 60	Male	Stage I	T1	M0	NA
TCGA-B2-4099-01A-02R-1188-07	TCGA-B2-4099-01A	KIRC	> 60	Male	Stage I	T1	M0	NA
TCGA-CJ-4918-01A-01R-1426-07	TCGA-CJ-4918-01A	KIRC	> 60	Male	Stage IV	T3	M1	N0
TCGA-B0-4706-01A-01R-1503-07	TCGA-B0-4706-01A	KIRC	> 60	Male	Stage III	T3	M0	NA
TCGA-A3-3352-01A-01R-0864-07	TCGA-A3-3352-01A	KIRC	> 60	Male	Stage III	T3	M0	N0
TCGA-AK-3444-01A-02R-1325-07	TCGA-AK-3444-01A	KIRC	> 60	Female	Stage I	T1	M0	NA
TCGA-B0-4814-01A-01R-1277-07	TCGA-B0-4814-01A	KIRC	<= 60	Male	Stage IV	T4	M1	N0
TCGA-BP-4166-01A-02R-1289-07	TCGA-BP-4166-01A	KIRC	> 60	Male	Stage III	T3	M0	N0
TCGA-B2-3924-01B-03R-A277-07	TCGA-B2-3924-01B	KIRC	> 60	Male	Stage I	T1	M0	NA
TCGA-CJ-5682-01A-11R-1541-07	TCGA-CJ-5682-01A	KIRC	<= 60	Male	Stage IV	T3	M1	NA
TCGA-A3-3357-01A-02R-1420-07	TCGA-A3-3357-01A	KIRC	> 60	Male	Stage II	T2	M0	N0
TCGA-CW-6090-01A-11R-1672-07	TCGA-CW-6090-01A	KIRC	> 60	Male	Stage I	T1	M0	NA
TCGA-B0-5700-01A-11R-1541-07	TCGA-B0-5700-01A	KIRC	> 60	Male	Stage I	T1	M0	N0
TCGA-B0-5115-01A-01R-1420-07	TCGA-B0-5115-01A	KIRC	<= 60	Male	Stage IV	T2	M1	N0
TCGA-A3-3383-01A-02R-1325-07	TCGA-A3-3383-01A	KIRC	<= 60	Male	Stage I	T1	M0	NA
TCGA-A3-A8OU-01A-11R-A37O-07	TCGA-A3-A8OU-01A	KIRC	> 60	Female	Stage I	T1	NA	NA
TCGA-BP-5187-01A-01R-1426-07	TCGA-BP-5187-01A	KIRC	<= 60	Male	Stage I	T1	M0	NA
TCGA-B0-5119-01A-02R-1420-07	TCGA-B0-5119-01A	KIRC	> 60	Female	Stage I	T1	M0	N0
TCGA-CZ-5987-01A-11R-1672-07	TCGA-CZ-5987-01A	KIRC	<= 60	Male	Stage IV	T3	M1	NA
TCGA-BP-4176-01A-02R-1289-07	TCGA-BP-4176-01A	KIRC	> 60	Male	Stage I	T1	M0	NA
TCGA-B0-5399-01A-01R-1503-07	TCGA-B0-5399-01A	KIRC	<= 60	Male	Stage I	T1	M0	N0
TCGA-BP-4790-01A-01R-1305-07	TCGA-BP-4790-01A	KIRC	> 60	Male	Stage I	T1	M0	NA
TCGA-CJ-4869-01A-02R-1426-07	TCGA-CJ-4869-01A	KIRC	<= 60	Male	Stage III	T2	M0	N1
TCGA-AK-3425-01A-02R-1277-07	TCGA-AK-3425-01A	KIRC	> 60	Male	Stage I	T1	M0	N0
TCGA-CJ-4891-01A-01R-1305-07	TCGA-CJ-4891-01A	KIRC	<= 60	Female	Stage III	T3	M0	N0
TCGA-B0-5693-01A-11R-1541-07	TCGA-B0-5693-01A	KIRC	<= 60	Female	Stage I	T1	M0	NA
TCGA-BP-4160-01A-02R-1289-07	TCGA-BP-4160-01A	KIRC	> 60	Male	Stage III	T3	M0	N0
TCGA-AK-3451-01A-02R-1188-07	TCGA-AK-3451-01A	KIRC	<= 60	Male	Stage II	T2	M0	N0
TCGA-BP-4159-01A-02R-1289-07	TCGA-BP-4159-01A	KIRC	> 60	Male	Stage I	T1	M0	N0
TCGA-B8-5162-01A-01R-1420-07	TCGA-B8-5162-01A	KIRC	> 60	Male	Stage II	T2	M0	NA
TCGA-B2-5639-01A-01R-1541-07	TCGA-B2-5639-01A	KIRC	<= 60	Male	Stage IV	T3	M1	NA
TCGA-CJ-5689-01A-11R-1541-07	TCGA-CJ-5689-01A	KIRC	> 60	Male	Stage I	T1	M0	NA
TCGA-BP-4158-01A-02R-1289-07	TCGA-BP-4158-01A	KIRC	> 60	Male	Stage I	T1	M0	N0
TCGA-BP-4782-01A-02R-1420-07	TCGA-BP-4782-01A	KIRC	<= 60	Female	Stage I	T1	M0	NA
TCGA-A3-3329-01A-01R-0864-07	TCGA-A3-3329-01A	KIRC	> 60	Male	Stage I	T1	M0	N0
TCGA-B8-A54K-01A-11R-A33J-07	TCGA-B8-A54K-01A	KIRC	> 60	Male	Stage I	T1	NA	NA
TCGA-AK-3447-01A-01R-1766-07	TCGA-AK-3447-01A	KIRC	> 60	Male	Stage II	T2	M0	NA
TCGA-BP-5199-01A-01R-1426-07	TCGA-BP-5199-01A	KIRC	<= 60	Male	Stage II	T2	M0	N0
TCGA-AK-3429-01A-02R-1325-07	TCGA-AK-3429-01A	KIRC	<= 60	Female	Stage II	T2	M0	N0
TCGA-DV-5576-01A-01R-1541-07	TCGA-DV-5576-01A	KIRC	<= 60	Female	Stage I	T1	M0	NA
TCGA-B0-5812-01A-11R-1672-07	TCGA-B0-5812-01A	KIRC	<= 60	Male	Stage I	T1	M0	NA
TCGA-CZ-4865-01A-02R-1503-07	TCGA-CZ-4865-01A	KIRC	> 60	Female	Stage I	T1	M0	NA
TCGA-DV-5574-01A-01R-1541-07	TCGA-DV-5574-01A	KIRC	<= 60	Male	Stage I	T1	M0	NA
TCGA-CJ-4636-01A-02R-1325-07	TCGA-CJ-4636-01A	KIRC	<= 60	Male	Stage III	T3	M0	N0
TCGA-B2-4098-01A-02R-1325-07	TCGA-B2-4098-01A	KIRC	> 60	Female	Stage I	T1	M0	NA
TCGA-B8-4621-01A-01R-1503-07	TCGA-B8-4621-01A	KIRC	> 60	Male	Stage I	T1	M0	N0
TCGA-CJ-4904-01A-02R-1426-07	TCGA-CJ-4904-01A	KIRC	<= 60	Female	Stage IV	T3	M1	N0
TCGA-A3-3328-01A-01R-0864-07	TCGA-A3-3328-01A	KIRC	> 60	Male	Stage I	T1	M0	N0
TCGA-AK-3436-01A-02R-1325-07	TCGA-AK-3436-01A	KIRC	<= 60	Male	Stage IV	T2	M1	N0
TCGA-A3-3358-01A-01R-1541-07	TCGA-A3-3358-01A	KIRC	<= 60	Female	Stage I	T1	M0	N0
TCGA-B0-5691-01A-11R-1541-07	TCGA-B0-5691-01A	KIRC	> 60	Female	Stage I	T1	M0	N0
TCGA-A3-3307-01A-01R-0864-07	TCGA-A3-3307-01A	KIRC	> 60	Male	Stage III	T3	M0	N0
TCGA-DV-5565-01A-01R-1541-07	TCGA-DV-5565-01A	KIRC	<= 60	Male	Stage I	T1	M0	NA
TCGA-BP-4344-01A-01R-1289-07	TCGA-BP-4344-01A	KIRC	> 60	Female	Stage I	T1	M0	NA
TCGA-CJ-6030-01A-11R-1672-07	TCGA-CJ-6030-01A	KIRC	> 60	Male	Stage I	T1	M0	N0
TCGA-A3-3359-01A-01R-0864-07	TCGA-A3-3359-01A	KIRC	> 60	Female	Stage I	T1	M0	N0
TCGA-BP-5189-01A-02R-1426-07	TCGA-BP-5189-01A	KIRC	<= 60	Male	Stage I	T1	M0	NA
TCGA-BP-4775-01A-01R-1289-07	TCGA-BP-4775-01A	KIRC	<= 60	Female	Stage I	T1	M0	NA
TCGA-BP-4342-01A-01R-1289-07	TCGA-BP-4342-01A	KIRC	> 60	Male	Stage II	T2	M0	N0
TCGA-B0-5088-01A-01R-1334-07	TCGA-B0-5088-01A	KIRC	<= 60	Male	Stage I	T1	M0	N0
TCGA-B0-4712-01A-01R-1503-07	TCGA-B0-4712-01A	KIRC	> 60	Male	Stage IV	T3	M1	NA
TCGA-CJ-4894-01A-01R-1305-07	TCGA-CJ-4894-01A	KIRC	<= 60	Male	Stage III	T3	M0	N0
TCGA-BP-4334-01A-01R-1289-07	TCGA-BP-4334-01A	KIRC	<= 60	Male	Stage III	T3	M0	N0
TCGA-BP-4965-01A-01R-1334-07	TCGA-BP-4965-01A	KIRC	<= 60	Male	Stage I	T1	M0	NA
TCGA-B0-5695-01A-11R-1541-07	TCGA-B0-5695-01A	KIRC	> 60	Female	Stage I	T1	M0	N0
TCGA-BP-4760-01A-02R-1420-07	TCGA-BP-4760-01A	KIRC	> 60	Male	Stage I	T1	M0	NA
TCGA-CZ-4856-01A-02R-1426-07	TCGA-CZ-4856-01A	KIRC	> 60	Female	Stage I	T1	M0	N0
TCGA-DV-5568-01A-01R-1541-07	TCGA-DV-5568-01A	KIRC	<= 60	Male	Stage I	T1	M0	NA
TCGA-B0-4815-01A-01R-1503-07	TCGA-B0-4815-01A	KIRC	> 60	Male	Stage III	T3	M0	NA
TCGA-BP-4331-01A-01R-1289-07	TCGA-BP-4331-01A	KIRC	<= 60	Male	Stage I	T1	M0	N0
TCGA-A3-3325-01A-01R-0864-07	TCGA-A3-3325-01A	KIRC	<= 60	Male	Stage I	T1	M0	NA
TCGA-BP-5009-01A-01R-1334-07	TCGA-BP-5009-01A	KIRC	<= 60	Male	Stage I	T1	M0	NA
TCGA-BP-4999-01A-01R-1334-07	TCGA-BP-4999-01A	KIRC	<= 60	Male	Stage I	T1	M0	NA
TCGA-BP-4986-01A-01R-1334-07	TCGA-BP-4986-01A	KIRC	> 60	Male	Stage I	T1	M0	N0
TCGA-CJ-4642-01B-01R-1305-07	TCGA-CJ-4642-01B	KIRC	<= 60	Male	Stage II	T2	M0	NA
TCGA-BP-4771-01A-01R-1289-07	TCGA-BP-4771-01A	KIRC	> 60	Male	Stage IV	T3	M1	N0
TCGA-B8-4148-01A-02R-1325-07	TCGA-B8-4148-01A	KIRC	> 60	Female	Stage I	T1	M0	N0
TCGA-BP-5006-01A-01R-1334-07	TCGA-BP-5006-01A	KIRC	> 60	Male	Stage I	T1	M0	N0
TCGA-BP-5168-01A-01R-1420-07	TCGA-BP-5168-01A	KIRC	> 60	Male	Stage I	T1	M0	NA
TCGA-CZ-4864-01A-01R-1503-07	TCGA-CZ-4864-01A	KIRC	> 60	Male	Stage II	T2	M0	N0
TCGA-AK-3450-01A-02R-1277-07	TCGA-AK-3450-01A	KIRC	> 60	Female	Stage I	T1	M0	N0
TCGA-B2-5635-01B-04R-A277-07	TCGA-B2-5635-01B	KIRC	> 60	Male	Stage I	T1	M0	NA
TCGA-DV-5575-01A-01R-1541-07	TCGA-DV-5575-01A	KIRC	<= 60	Female	Stage I	T1	M0	NA
TCGA-AK-3434-01A-02R-1277-07	TCGA-AK-3434-01A	KIRC	> 60	Male	Stage I	T1	M0	NA
TCGA-CJ-4643-01A-02R-1325-07	TCGA-CJ-4643-01A	KIRC	> 60	Female	Stage II	T2	M0	N0
TCGA-BP-4347-01A-01R-1289-07	TCGA-BP-4347-01A	KIRC	> 60	Male	Stage III	T3	M0	NA
TCGA-CJ-4900-01A-01R-1334-07	TCGA-CJ-4900-01A	KIRC	> 60	Female	Stage IV	T4	M1	N1
TCGA-MM-A563-01A-11R-A266-07	TCGA-MM-A563-01A	KIRC	<= 60	Male	NA	T3	NA	NA
TCGA-CZ-4860-01A-01R-1305-07	TCGA-CZ-4860-01A	KIRC	<= 60	Male	Stage IV	T4	M1	NA
TCGA-CZ-4859-01A-02R-1426-07	TCGA-CZ-4859-01A	KIRC	<= 60	Female	Stage I	T1	M0	N0
TCGA-A3-3308-01A-02R-1325-07	TCGA-A3-3308-01A	KIRC	> 60	Female	Stage III	T3	M0	N0
TCGA-BP-4777-01A-01R-1289-07	TCGA-BP-4777-01A	KIRC	<= 60	Male	Stage I	T1	M0	NA
TCGA-BP-4759-01A-01R-1289-07	TCGA-BP-4759-01A	KIRC	<= 60	Male	Stage I	T1	M0	NA
TCGA-BP-5004-01A-01R-1334-07	TCGA-BP-5004-01A	KIRC	<= 60	Male	Stage I	T1	M0	NA
TCGA-AK-3460-01A-02R-1277-07	TCGA-AK-3460-01A	KIRC	<= 60	Male	Stage I	T1	M0	NA
TCGA-A3-3378-01A-02R-1325-07	TCGA-A3-3378-01A	KIRC	<= 60	Male	Stage I	T1	M0	N0
TCGA-B8-A54I-01A-21R-A33J-07	TCGA-B8-A54I-01A	KIRC	<= 60	Male	Stage I	T1	NA	NA
TCGA-B0-4813-01A-01R-1277-07	TCGA-B0-4813-01A	KIRC	> 60	Male	Stage III	T3	M0	NA
TCGA-CJ-4903-01A-01R-1426-07	TCGA-CJ-4903-01A	KIRC	<= 60	Male	Stage I	T1	M0	NA
TCGA-B8-4620-01A-02R-1325-07	TCGA-B8-4620-01A	KIRC	> 60	Female	Stage III	T3	M0	N0
TCGA-CJ-4641-01A-02R-1325-07	TCGA-CJ-4641-01A	KIRC	<= 60	Female	Stage IV	T3	M1	NA
TCGA-B0-4698-01A-01R-1503-07	TCGA-B0-4698-01A	KIRC	> 60	Male	Stage IV	T4	M0	NA
TCGA-BP-4325-01A-02R-1289-07	TCGA-BP-4325-01A	KIRC	> 60	Female	Stage I	T1	M0	N0
TCGA-CZ-5462-01A-01R-1503-07	TCGA-CZ-5462-01A	KIRC	> 60	Male	Stage IV	T1	M1	NA
TCGA-DV-5567-01A-01R-1541-07	TCGA-DV-5567-01A	KIRC	<= 60	Female	Stage I	T1	M0	NA
TCGA-AK-3454-01A-02R-1277-07	TCGA-AK-3454-01A	KIRC	> 60	Male	Stage I	T1	M0	NA
TCGA-BP-4993-01A-02R-1420-07	TCGA-BP-4993-01A	KIRC	<= 60	Male	Stage I	T1	M0	NA
TCGA-BP-5178-01A-01R-1426-07	TCGA-BP-5178-01A	KIRC	> 60	Male	Stage IV	T3	M1	NA
	UGT1A6
	HMGCS2
	HLF
	MYO3B
	IL6
	ADA
	TFR2
	CD44
	CDON
	FIBCD1
	TACSTD2
	MMAA
	NXN
	HOXB5
	SLC10A2
	SLC35F3
	FBLN1
	WNT5B
	NUP62CL
	ITIH4
	CDKL3
	F5
	MLXIP
	PSD3
	THPO
	ADH6
	PDZD3
	TRIM62
	MYL3
	FAM81B
	PAH
	PRKAR2B
	ZWINT
	FKBP14
	LRRC19
	VIL1
	LRRC6
	PLA2G12B
	CLDN14
	CPNE8
	PORCN
	SEMA6A
	DIP2C
	KIAA0895
	RNF150
	MFAP4
	HIST1H2BN
	PCGF6
	CCDC28A
	ULBP2
	SMTNL2
	ADCY2
	FGF14
	SLC5A9
	PLG
	GUCA2B
	FXYD3
	DPYSL3
	GAD1
	DHDH
	OSGEPL1
	ENPP7
	TMPRSS3
	TRAM1L1
	CCNB1
	KCTD14
	CIB4
	TNNT1
	DHRS4
	ALDOB
	IRS1
	FPGT
	GALNT1
	ONECUT2
	SAE1
	SLITRK2
	ELMO2
	KCNN1
	GDPD5
	ACTN1
	SLC6A18
	DNAH7
	MAP3K14
	SENP8
	LMO1
	MARS
	ZSWIM5
	TTC30A
	LEFTY1
	CRY2
	HOXB3
	ANK1
	PNMA3
	PACS1
	TMEM130
	PLCH2
	CH25H
	UBE2C
	NOX4
	COL22A1
	HUNK
	CCDC80
	LIPG
	C21orf62
	TM6SF2
	RLN2
	TSPYL5
	TPCN2
	GABRB3
	HIST1H3H
	GAS1
	MAD2L1
	GTPBP1
	SEMA4G
	SLC26A9
	ACAD11
	TTC25
	MOGAT3
	IGFBP1
	PGBD5
	AMDHD1
	CNNM1
	STK24
	LRP12
	PCBP3
	MAEL
	BAG2
	TTC12
	STAMBPL1
	TBC1D2
	ITPKA
	SERPINE1
	PRTFDC1
	SLC26A1
	FMO4
	ZNF711
	FTSJ1
	LTV1
	TUBB2B
	HOXB6
	RCC2
	RHOV
	NAV2
	PKIA
	ZNF214
	TMCO4
	AEBP1
	PLCD1
	STAC
	ADAMTS8
	ZMYND12
	HS6ST1
	ABHD1
	PPP4R1
	AKT1
	TPK1
	LUM
	ARL4A
	RGL1
	KL
	CPXM2
	N4BP3
	FKBP4
	ZNF541
	KIAA1549
	TSPAN18
	CAP2
	RALB
	MYO7B
	HRH1
	MAPK10
	SLC44A4
	CDH11
	RSPO3
	UCK2
	SFRP2

## Sheet: Table.S6A
KEGG analysis of hub-DEGs
ID	Description	GeneRatio	BgRatio	pvalue	p.adjust	qvalue	geneID	Count
hsa01230	Biosynthesis of amino acids	4/20	75/8878	2.05454e-05	0.00143818	0.00136248	ENSG00000059573/ENSG00000060982/ENSG00000111674/ENSG00000111640	4
hsa00010	Glycolysis / Gluconeogenesis	2/20	67/8878	0.00976577	0.341802	0.323813	ENSG00000111674/ENSG00000111640	2
hsa04662	B cell receptor signaling pathway	2/20	91/8878	0.0175132	0.353058	0.334476	ENSG00000105369/ENSG00000254087	2
hsa04066	HIF-1 signaling pathway	2/20	110/8878	0.024994	0.353058	0.334476	ENSG00000111674/ENSG00000111640	2
hsa01200	Carbon metabolism	2/20	116/8878	0.0275856	0.353058	0.334476	ENSG00000111674/ENSG00000111640	2
hsa01240	Biosynthesis of cofactors	2/20	153/8878	0.0457705	0.353058	0.334476	ENSG00000060982/ENSG00000065911	2
hsa00770	Pantothenate and CoA biosynthesis	1/20	21/8878	0.0463083	0.353058	0.334476	ENSG00000060982	1
hsa00062	Fatty acid elongation	1/20	27/8878	0.0591604	0.353058	0.334476	ENSG00000012660	1
hsa01040	Biosynthesis of unsaturated fatty acids	1/20	27/8878	0.0591604	0.353058	0.334476	ENSG00000012660	1
hsa04062	Chemokine signaling pathway	2/20	193/8878	0.0691483	0.353058	0.334476	ENSG00000121966/ENSG00000254087	2
hsa01210	2-Oxocarboxylic acid metabolism	1/20	33/8878	0.0718478	0.353058	0.334476	ENSG00000060982	1
hsa05340	Primary immunodeficiency	1/20	38/8878	0.0822963	0.353058	0.334476	ENSG00000105369	1
hsa00670	One carbon pool by folate	1/20	39/8878	0.0843726	0.353058	0.334476	ENSG00000065911	1
hsa04810	Regulation of actin cytoskeleton	2/20	232/8878	0.0949658	0.353058	0.334476	ENSG00000121966/ENSG00000161638	2
hsa04820	Cytoskeleton in muscle cells	2/20	232/8878	0.0949658	0.353058	0.334476	ENSG00000111674/ENSG00000161638	2
hsa03050	Proteasome	1/20	46/8878	0.0987819	0.353058	0.334476	ENSG00000068878	1
hsa00280	Valine, leucine and isoleucine degradation	1/20	48/8878	0.102859	0.353058	0.334476	ENSG00000060982	1
hsa00330	Arginine and proline metabolism	1/20	50/8878	0.106919	0.353058	0.334476	ENSG00000059573	1
hsa04672	Intestinal immune network for IgA production	1/20	50/8878	0.106919	0.353058	0.334476	ENSG00000121966	1
hsa04144	Endocytosis	2/20	252/8878	0.10916	0.353058	0.334476	ENSG00000121966/ENSG00000168461	2
hsa04020	Calcium signaling pathway	2/20	254/8878	0.110611	0.353058	0.334476	ENSG00000121966/ENSG00000137825	2
hsa00270	Cysteine and methionine metabolism	1/20	52/8878	0.110961	0.353058	0.334476	ENSG00000060982	1
hsa01212	Fatty acid metabolism	1/20	57/8878	0.120991	0.353266	0.334673	ENSG00000012660	1
hsa04730	Long-term depression	1/20	60/8878	0.126957	0.353266	0.334673	ENSG00000254087	1
hsa03250	Viral life cycle - HIV-1	1/20	64/8878	0.134852	0.353266	0.334673	ENSG00000121966	1
hsa04664	Fc epsilon RI signaling pathway	1/20	69/8878	0.144625	0.353266	0.334673	ENSG00000254087	1
hsa05120	Epithelial cell signaling in Helicobacter pylori infection	1/20	71/8878	0.148505	0.353266	0.334673	ENSG00000254087	1
hsa00562	Inositol phosphate metabolism	1/20	73/8878	0.152368	0.353266	0.334673	ENSG00000137825	1
hsa03018	RNA degradation	1/20	78/8878	0.161953	0.353266	0.334673	ENSG00000111674	1
hsa05100	Bacterial invasion of epithelial cells	1/20	78/8878	0.161953	0.353266	0.334673	ENSG00000161638	1
hsa05133	Pertussis	1/20	78/8878	0.161953	0.353266	0.334673	ENSG00000161638	1
hsa04623	Cytosolic DNA-sensing pathway	1/20	83/8878	0.171436	0.353266	0.334673	ENSG00000163568	1
hsa05412	Arrhythmogenic right ventricular cardiomyopathy	1/20	86/8878	0.177076	0.353266	0.334673	ENSG00000161638	1
hsa04610	Complement and coagulation cascades	1/20	88/8878	0.180816	0.353266	0.334673	ENSG00000135919	1
hsa04512	ECM-receptor interaction	1/20	89/8878	0.18268	0.353266	0.334673	ENSG00000161638	1
hsa04070	Phosphatidylinositol signaling system	1/20	98/8878	0.199275	0.353266	0.334673	ENSG00000137825	1
hsa04666	Fc gamma R-mediated phagocytosis	1/20	99/8878	0.201099	0.353266	0.334673	ENSG00000254087	1
hsa05410	Hypertrophic cardiomyopathy	1/20	99/8878	0.201099	0.353266	0.334673	ENSG00000161638	1
hsa04061	Viral protein interaction with cytokine and cytokine receptor	1/20	100/8878	0.202919	0.353266	0.334673	ENSG00000121966	1
hsa04640	Hematopoietic cell lineage	1/20	100/8878	0.202919	0.353266	0.334673	ENSG00000161638	1
hsa04064	NF-kappa B signaling pathway	1/20	105/8878	0.21196	0.353266	0.334673	ENSG00000254087	1
hsa05414	Dilated cardiomyopathy	1/20	105/8878	0.21196	0.353266	0.334673	ENSG00000161638	1
hsa04931	Insulin resistance	1/20	109/8878	0.219123	0.356711	0.337937	ENSG00000101255	1
hsa04670	Leukocyte transendothelial migration	1/20	116/8878	0.231509	0.368309	0.348925	ENSG00000121966	1
hsa04611	Platelet activation	1/20	126/8878	0.24888	0.387147	0.36677	ENSG00000254087	1
hsa05135	Yersinia infection	1/20	138/8878	0.269233	0.409703	0.388139	ENSG00000161638	1
hsa04120	Ubiquitin mediated proteolysis	1/20	142/8878	0.2759	0.410915	0.389288	ENSG00000175063	1
hsa04110	Cell cycle	1/20	158/8878	0.301995	0.433709	0.410882	ENSG00000167513	1
hsa04145	Phagosome	1/20	159/8878	0.303596	0.433709	0.410882	ENSG00000161638	1
hsa03008	Ribosome biogenesis in eukaryotes	1/20	168/8878	0.317849	0.435846	0.412907	ENSG00000135372	1
hsa04141	Protein processing in endoplasmic reticulum	1/20	170/8878	0.320978	0.435846	0.412907	ENSG00000185624	1
hsa04360	Axon guidance	1/20	184/8878	0.342504	0.435846	0.412907	ENSG00000121966	1
hsa04621	NOD-like receptor signaling pathway	1/20	189/8878	0.350034	0.435846	0.412907	ENSG00000163568	1
hsa05167	Kaposi sarcoma-associated herpesvirus infection	1/20	196/8878	0.360438	0.435846	0.412907	ENSG00000254087	1
hsa04510	Focal adhesion	1/20	203/8878	0.370684	0.435846	0.412907	ENSG00000161638	1
hsa05130	Pathogenic Escherichia coli infection	1/20	203/8878	0.370684	0.435846	0.412907	ENSG00000111640	1
hsa05169	Epstein-Barr virus infection	1/20	204/8878	0.372134	0.435846	0.412907	ENSG00000254087	1
hsa05205	Proteoglycans in cancer	1/20	204/8878	0.372134	0.435846	0.412907	ENSG00000161638	1
hsa05203	Viral carcinogenesis	1/20	205/8878	0.373582	0.435846	0.412907	ENSG00000254087	1
hsa05415	Diabetic cardiomyopathy	1/20	205/8878	0.373582	0.435846	0.412907	ENSG00000111640	1
hsa05170	Human immunodeficiency virus 1 infection	1/20	213/8878	0.38505	0.439531	0.416398	ENSG00000121966	1
hsa05417	Lipid and atherosclerosis	1/20	216/8878	0.389299	0.439531	0.416398	ENSG00000254087	1
hsa05163	Human cytomegalovirus infection	1/20	226/8878	0.403261	0.448068	0.424485	ENSG00000121966	1
hsa05131	Shigellosis	1/20	250/8878	0.435544	0.470456	0.445695	ENSG00000161638	1
hsa05132	Salmonella infection	1/20	251/8878	0.436852	0.470456	0.445695	ENSG00000111640	1
hsa04060	Cytokine-cytokine receptor interaction	1/20	298/8878	0.4952	0.525212	0.497569	ENSG00000121966	1
hsa05206	MicroRNAs in cancer	1/20	312/8878	0.511438	0.534338	0.506215	ENSG00000161638	1
hsa05165	Human papillomavirus infection	1/20	333/8878	0.534868	0.5506	0.521621	ENSG00000161638	1
hsa04151	PI3K-Akt signaling pathway	1/20	362/8878	0.565475	0.573671	0.543477	ENSG00000161638	1
hsa05010	Alzheimer disease	1/20	391/8878	0.594162	0.594162	0.562891	ENSG00000111640	1

## Sheet: Table.S6B
	StromalScore	ImmuneScore	ESTIMATEScore	TumorPurity
TCGA.B0.4712.11A.02R.1503.07	-1048.95	-667.485	-1716.44	0.938328
TCGA.CJ.6030.11A.01R.1672.07	22.8076	201.081	223.889	0.803377
TCGA.CJ.5689.11A.01R.1541.07	351.56	335.42	686.98	0.761075
TCGA.A3.3358.11A.01R.1541.07	-19.6739	-123.474	-143.147	0.834278
TCGA.CZ.5467.11A.01R.1503.07	-399.252	-156.651	-555.903	0.866131
TCGA.CJ.5677.11A.01R.1541.07	79.4162	-424.806	-345.389	0.850275
TCGA.CJ.5672.11A.01R.1541.07	-233.742	-893.38	-1127.12	0.904948
TCGA.B2.5636.11A.01R.1541.07	428.192	208.413	636.605	0.76585
TCGA.CW.5591.11A.01R.1541.07	841.21	1684.86	2526.07	0.560519
TCGA.B0.5709.11A.01R.1541.07	259.694	-179.068	80.6258	0.815721
TCGA.B8.4620.11A.01R.1758.07	1086.57	1587.67	2674.24	0.542375
TCGA.B0.5402.11A.01R.1503.07	1010.09	754.25	1764.34	0.649422
TCGA.CJ.5679.11A.01R.1541.07	357.455	159.141	516.596	0.777058
TCGA.CZ.5453.11A.01R.1503.07	118.187	-339.144	-220.957	0.84052
TCGA.CZ.4864.11A.01R.1503.07	379.122	-38.028	341.094	0.793014
TCGA.CW.5584.11A.01R.1541.07	464.23	762.977	1227.21	0.707299
TCGA.CJ.5681.11A.01R.1541.07	-188.499	-635.654	-824.152	0.885135
TCGA.CW.5581.11A.01R.1541.07	-104.275	-662.287	-766.562	0.88117
TCGA.CZ.4863.11A.01R.1503.07	-138.669	-462.247	-600.916	0.869415
TCGA.CW.5580.11A.02R.1672.07	-49.9358	-326.711	-376.647	0.852681
TCGA.B0.5711.11A.01R.1672.07	-56.348	-578.567	-634.915	0.87187
TCGA.CJ.5676.11A.01R.1541.07	562.469	468.147	1030.62	0.727401
TCGA.CZ.5455.11A.01R.1503.07	-80.7717	-563.628	-644.4	0.872551
TCGA.CZ.5986.11A.01R.1672.07	233.378	-616.273	-382.895	0.85316
TCGA.CZ.5451.11A.01R.1503.07	-19.9092	-610.585	-630.494	0.871552
TCGA.CZ.5982.11A.01R.1672.07	-163.619	-941.367	-1104.99	0.903561
TCGA.B8.4622.11A.01R.1758.07	1004.59	1227.86	2232.45	0.59568
TCGA.B0.5697.11A.01R.1541.07	-220.801	-934.703	-1155.5	0.906713
TCGA.CZ.5457.11A.01R.1503.07	-177.36	-16.0235	-193.384	0.838321
TCGA.CZ.5452.11A.01R.1503.07	-343.348	-835.311	-1178.66	0.908141
TCGA.CZ.4865.11A.01R.1503.07	438.391	-251.095	187.296	0.806564
TCGA.B0.5703.11A.01R.1541.07	-134.802	-227.88	-362.682	0.851609
TCGA.B0.4700.11A.01R.1541.07	285.274	-328.074	-42.8	0.826066
TCGA.B0.5694.11A.01R.1541.07	748.627	560.181	1308.81	0.698781
TCGA.CZ.5469.11A.01R.1503.07	-484.947	-709.739	-1194.69	0.909124
TCGA.CZ.5989.11A.01R.1672.07	420.9	4.69979	425.599	0.785396
TCGA.B0.5691.11A.01R.1541.07	834.809	585.665	1420.47	0.686962
TCGA.CZ.5984.11A.01R.1672.07	493.857	-331.342	162.515	0.808709
TCGA.CZ.5985.11A.01R.1672.07	106.538	-657.472	-550.934	0.865766
TCGA.B0.5690.11A.01R.1541.07	-103.781	-886.758	-990.539	0.896236
TCGA.CZ.5465.11A.01R.1503.07	-454.121	-786.523	-1240.64	0.911913
TCGA.B0.5712.11A.01R.1672.07	1201.87	770.518	1972.39	0.6259
TCGA.CZ.5454.11A.01R.1503.07	-316.656	-582.029	-898.685	0.890173
TCGA.CZ.5470.11A.01R.1503.07	388.585	-154.94	233.645	0.802523
TCGA.CZ.5456.11A.02R.1503.07	-465.503	-661.67	-1127.17	0.904951
TCGA.B0.5699.11A.01R.1541.07	199.311	-629.103	-429.792	0.856731
TCGA.B8.5552.11A.01R.1672.07	1105.31	927.055	2032.36	0.61901
TCGA.B0.5696.11A.01R.1541.07	25.3763	-488.723	-463.347	0.859261
TCGA.CZ.5461.11A.01R.1503.07	192.998	-235.79	-42.7914	0.826066
TCGA.B0.5706.11A.01R.1541.07	-264.067	-652.345	-916.413	0.891356
TCGA.B0.5705.11A.01R.1541.07	76.2842	-411.261	-334.977	0.84947
TCGA.CW.6088.11A.01R.1672.07	-469.072	-889.461	-1358.53	0.918878
TCGA.CZ.5462.11A.01R.1503.07	-222.358	-81.4601	-303.818	0.847048
TCGA.CW.6090.11A.01R.1672.07	-171.572	-867.207	-1038.78	0.899354
TCGA.CZ.5466.11A.01R.1503.07	622.038	537.475	1159.51	0.714288
TCGA.CJ.6033.11A.01R.1858.07	-380.599	-15.3794	-395.978	0.85416
TCGA.CJ.5680.11A.01R.1541.07	610.565	287.146	897.711	0.740649
TCGA.CJ.5678.11A.01R.1541.07	281.997	188.003	470	0.781345
TCGA.CZ.5468.11A.01R.1503.07	-218.792	-146.117	-364.909	0.85178
TCGA.B0.5701.11A.01R.1541.07	1042.65	329.627	1372.28	0.692085
TCGA.B8.5549.11A.01R.1541.07	-355.859	-736.408	-1092.27	0.902759
TCGA.B2.5641.11A.01R.1541.07	-456.285	-782.884	-1239.17	0.911824
TCGA.CZ.5463.11A.01R.1503.07	149.787	-203.243	-53.4562	0.826947
TCGA.CZ.5458.11A.01R.1503.07	-478.121	-682.051	-1160.17	0.907002
TCGA.CW.5585.11A.01R.1541.07	240.728	-301.202	-60.4736	0.827526
TCGA.CW.5589.11A.01R.1541.07	42.9603	-381.378	-338.418	0.849736
TCGA.CW.5587.11A.01R.1541.07	-4.74178	-329.525	-334.267	0.849415
TCGA.B8.4619.11A.01R.1758.07	121.739	461.154	582.893	0.770896
TCGA.A3.3387.11A.01R.1541.07	16.8706	-282.461	-265.59	0.844052
TCGA.CZ.5987.11A.01R.1672.07	1205.23	964.023	2169.25	0.603105
TCGA.CZ.5988.11A.01R.1672.07	-98.556	-693.018	-791.574	0.8829
TCGA.CW.6087.11A.01R.1672.07	-256.602	-495.849	-752.452	0.880189
TCGA.DV.A4W0.05A.11R.A266.07	-415.55	152.147	-263.403	0.84388
TCGA.B0.4815.01A.01R.1503.07	982.882	2869.87	3852.75	0.389667
TCGA.B0.4712.01A.01R.1503.07	1171.66	2098.12	3269.77	0.466955
TCGA.CJ.6030.01A.11R.1672.07	1139.68	2654.24	3793.92	0.397605
TCGA.B0.5693.01A.11R.1541.07	768.647	633.928	1402.58	0.688869
TCGA.CZ.4856.01A.02R.1426.07	947.685	1762.95	2710.64	0.537879
TCGA.AK.3425.01A.02R.1277.07	1337.21	2359.71	3696.93	0.410628
TCGA.BP.4994.01A.01R.1334.07	70.9997	770.613	841.613	0.746156
TCGA.BP.5009.01A.01R.1334.07	949.259	2037.63	2986.89	0.503261
TCGA.BP.4760.01A.02R.1420.07	583.988	602.533	1186.52	0.711508
TCGA.CJ.4894.01A.01R.1305.07	836.2	2207.01	3043.21	0.4961
TCGA.BP.4331.01A.01R.1289.07	874.301	1915.34	2789.64	0.528067
TCGA.AK.3454.01A.02R.1277.07	1123.27	1699.37	2822.64	0.523947
TCGA.BP.4799.01A.01R.1305.07	1115.73	1936.42	3052.15	0.49496
TCGA.B8.5162.01A.01R.1420.07	1856.48	3054.26	4910.74	0.242526
TCGA.BP.4807.01A.01R.1305.07	1392.27	1479.78	2872.04	0.517757
TCGA.BP.5006.01A.01R.1334.07	725.889	1388.24	2114.13	0.609539
TCGA.BP.4795.01A.02R.1420.07	1492.01	1636.61	3128.62	0.485176
TCGA.AK.3429.01A.02R.1325.07	626.433	2289.15	2915.58	0.512278
TCGA.B0.5703.01A.11R.1541.07	205.342	1376.48	1581.82	0.66956
TCGA.B0.5108.01A.01R.1420.07	1751.86	2547.88	4299.73	0.328446
TCGA.AK.3434.01A.02R.1277.07	802.29	1639.94	2442.23	0.570667
TCGA.CJ.4887.01A.01R.1305.07	889.718	2549.83	3439.55	0.444775
TCGA.AK.3426.01A.02R.1325.07	1263.79	3285.69	4549.48	0.293608
TCGA.BP.5180.01A.01R.1426.07	122.951	1925.01	2047.96	0.61721
TCGA.A3.3362.01A.02R.1325.07	990.961	1117.64	2108.6	0.610182
TCGA.B0.5713.01A.11R.1672.07	647.073	1391.48	2038.55	0.618296
TCGA.B8.4146.01B.11R.1672.07	743.301	1562.18	2305.48	0.587035
TCGA.BP.4977.01A.01R.1334.07	623.61	1523.11	2146.72	0.60574
TCGA.BP.4981.01A.01R.1334.07	333.44	1623.67	1957.11	0.627647
TCGA.B8.4622.01A.02R.1277.07	906.288	1998.55	2904.84	0.513632
TCGA.A3.A8CQ.01A.11R.A37O.07	832.166	1053.71	1885.87	0.635754
TCGA.B8.4151.01A.01R.1188.07	321.275	902.249	1223.52	0.707681
TCGA.B0.4845.01A.01R.1277.07	357.358	921.58	1278.94	0.70191
TCGA.BP.5008.01A.01R.1334.07	1318.82	2024.14	3342.96	0.457428
TCGA.B2.4101.01A.02R.1277.07	961.479	2217.94	3179.42	0.478642
TCGA.CZ.5467.01A.01R.1503.07	776.038	1081.45	1857.49	0.638964
TCGA.CJ.4895.01A.01R.1305.07	1539.88	1952.71	3492.59	0.437788
TCGA.BP.4961.01A.01R.1334.07	1013	1085.99	2098.99	0.6113
TCGA.B0.4703.01A.01R.1277.07	1663.23	2011.67	3674.9	0.413575
TCGA.BP.5001.01A.01R.1334.07	339.365	1457.64	1797	0.645769
TCGA.B0.5092.01A.01R.1420.07	825.414	2718.65	3544.06	0.430983
TCGA.CZ.4857.01A.01R.1305.07	960.498	1738.67	2699.17	0.539297
TCGA.B0.4693.01A.01R.1277.07	499.714	2011.05	2510.77	0.562377
TCGA.B8.4143.01A.01R.1188.07	854.69	2413.76	3268.45	0.467127
TCGA.BP.4964.01A.01R.1334.07	804.504	1608.79	2413.3	0.574149
TCGA.BP.4971.01A.01R.1334.07	1451.43	2391.47	3842.91	0.390997
TCGA.A3.3351.01A.02R.1325.07	946.505	2466.74	3413.24	0.44823
TCGA.BP.4355.01A.01R.1289.07	1029.18	905.401	1934.58	0.630219
TCGA.B0.5106.01A.01R.1420.07	975.245	2101.25	3076.49	0.491852
TCGA.B8.A54G.01A.11R.A266.07	371.719	2999.88	3371.6	0.453686
TCGA.B2.5636.01A.02R.1541.07	930.484	976.841	1907.33	0.63332
TCGA.B2.A4SR.01A.11R.A266.07	759.991	1541.43	2301.42	0.587517
TCGA.AK.3453.01A.02R.1277.07	350.698	2577.2	2927.9	0.510725
TCGA.B0.5399.01A.01R.1503.07	974.648	1817.4	2792.05	0.527766
TCGA.BP.4790.01A.01R.1305.07	1456.52	2123.43	3579.95	0.426223
TCGA.B0.4699.01A.01R.1277.07	581.894	1836.03	2417.92	0.573594
TCGA.CJ.6032.01A.11R.1672.07	480.691	1199.77	1680.46	0.658735
TCGA.B0.5709.01A.11R.1541.07	1744.43	2590.38	4334.81	0.323579
TCGA.AK.3445.01A.02R.1277.07	936.436	2007.35	2943.79	0.508718
TCGA.BP.4970.01A.01R.1334.07	1611.7	2144.47	3756.17	0.402684
TCGA.BP.4963.01A.01R.1334.07	911.689	2001.02	2912.7	0.512641
TCGA.BP.4770.01A.01R.1503.07	1830.47	1328.22	3158.7	0.48131
TCGA.BP.5173.01A.01R.1426.07	802.281	1763.94	2566.22	0.555628
TCGA.BP.4777.01A.01R.1289.07	1091.44	2735.69	3827.14	0.393127
TCGA.A3.A6NI.01A.11R.A33J.07	540.448	1446.94	1987.39	0.624182
TCGA.CJ.4903.01A.01R.1426.07	999.331	1818.8	2818.13	0.524511
TCGA.CJ.4882.01A.02R.1426.07	1305.48	2553.53	3859.01	0.388821
TCGA.AK.3465.01A.02R.1325.07	-179.948	-276.599	-456.547	0.85875
TCGA.BP.4325.01A.02R.1289.07	559.422	1822.95	2382.37	0.577861
TCGA.A3.3322.01A.02R.1325.07	851.115	998.631	1849.75	0.639838
TCGA.DV.A4VX.01A.11R.A266.07	-280.968	1149.64	868.674	0.743506
TCGA.BP.5183.01A.01R.1426.07	274.624	1951.43	2226.06	0.596433
TCGA.CJ.4902.01A.01R.1426.07	1452.53	2097.74	3550.28	0.43016
TCGA.CJ.4874.01A.01R.1305.07	903.035	1989.82	2892.85	0.515141
TCGA.CJ.4635.01A.02R.1305.07	949.327	2044.71	2994.04	0.502354
TCGA.B0.5120.01A.01R.1420.07	1388	1564.83	2952.83	0.507575
TCGA.BP.4975.01A.01R.1334.07	1151.08	1135.86	2286.93	0.589237
TCGA.EU.5904.01A.11R.1672.07	1049.8	1399.12	2448.92	0.569861
TCGA.B0.4822.01A.01R.1277.07	1088.75	1829.54	2918.29	0.511937
TCGA.A3.3372.01A.02R.1325.07	886.739	1616.76	2503.5	0.563259
TCGA.AK.3461.01A.02R.1277.07	876.745	1512.59	2389.34	0.577026
TCGA.A3.A6NN.01A.12R.A33J.07	989.755	1724.98	2714.73	0.537372
TCGA.A3.3352.01A.01R.0864.07	626.38	1669.77	2296.15	0.588144
TCGA.B2.3923.01B.10R.A277.07	451.628	-115.313	336.315	0.793441
TCGA.B0.5097.01A.01R.1420.07	1775.84	1944.09	3719.94	0.407546
TCGA.CJ.5681.01A.11R.1541.07	-174.403	328.288	153.885	0.809453
TCGA.G6.A5PC.01A.11R.A33J.07	45.0185	1599.44	1644.46	0.662702
TCGA.CJ.4916.01A.01R.1426.07	941.842	2781.99	3723.84	0.407024
TCGA.CJ.5679.01A.11R.1541.07	509.176	563.597	1072.77	0.723141
TCGA.A3.3385.01A.02R.1420.07	27.402	462.08	489.482	0.779557
TCGA.B0.4839.01A.01R.1305.07	977.66	1958.05	2935.71	0.509739
TCGA.B2.3924.01A.02R.1325.07	857.401	2668.09	3525.49	0.433442
TCGA.B2.3924.01B.03R.A277.07	829.335	1699.96	2529.29	0.560126
TCGA.B8.A54F.01A.11R.A266.07	1015.06	1540.88	2555.94	0.556882
TCGA.BP.4166.01A.02R.1289.07	1227.53	1626.01	2853.55	0.520077
TCGA.CJ.4639.01A.02R.1325.07	743.894	1881.88	2625.78	0.548338
TCGA.B0.4811.01A.01R.1503.07	461.033	1149.45	1610.48	0.66643
TCGA.B0.4710.01A.01R.1503.07	804.445	1446.73	2251.17	0.59347
TCGA.A3.3383.01A.02R.1325.07	550.954	2122.92	2673.87	0.54242
TCGA.B8.5550.01A.01R.1541.07	1582.45	1491.84	3074.29	0.492133
TCGA.EU.5906.01A.11R.1672.07	1082.24	1484.23	2566.47	0.555597
TCGA.B0.5702.01A.11R.1541.07	851.008	1776.73	2627.74	0.548098
TCGA.BP.4345.01A.01R.1289.07	1962.11	2167.16	4129.28	0.351974
TCGA.B0.5400.01A.01R.1503.07	973.22	1953.58	2926.8	0.510864
TCGA.B0.5094.01A.01R.1420.07	-15.7958	957.574	941.778	0.736287
TCGA.BP.4160.01A.02R.1289.07	1236.87	2400.56	3637.43	0.418576
TCGA.CJ.4869.01A.02R.1426.07	871.131	2731.28	3602.41	0.423239
TCGA.CJ.6027.01A.11R.1672.07	550.202	2541.38	3091.58	0.489922
TCGA.BP.4993.01A.02R.1420.07	1156.47	1557.45	2713.92	0.537472
TCGA.BP.5178.01A.01R.1426.07	925.543	2173.6	3099.15	0.488954
TCGA.CJ.4642.01B.01R.1305.07	876.488	827.195	1703.68	0.656167
TCGA.DV.5574.01A.01R.1541.07	1693.92	2310.05	4003.97	0.36913
TCGA.BP.4159.01A.02R.1289.07	1206	1673.45	2879.45	0.516826
TCGA.BP.4771.01A.01R.1289.07	1248.38	3142.43	4390.81	0.31579
TCGA.BP.4995.01A.01R.1334.07	339.039	1154.84	1493.88	0.679092
TCGA.B2.4098.01A.02R.1325.07	173.544	1704.01	1877.55	0.636696
TCGA.A3.3358.01A.01R.1541.07	1064.92	2352.61	3417.53	0.447668
TCGA.CZ.4862.01A.01R.1305.07	964.232	2615.29	3579.52	0.426281
TCGA.DV.5569.01A.01R.1541.07	961.144	1703.02	2664.17	0.543617
TCGA.BP.5181.01A.01R.1426.07	850.572	1295.38	2145.95	0.60583
TCGA.A3.3307.01A.01R.0864.07	686.886	1730.92	2417.8	0.573608
TCGA.CZ.4854.01A.01R.1305.07	635.078	1338.37	1973.45	0.625779
TCGA.DV.5575.01A.01R.1541.07	1050.24	1652.46	2702.7	0.53886
TCGA.B2.5635.01A.01R.1541.07	806.683	2180.89	2987.57	0.503174
TCGA.B0.4841.01A.01R.1277.07	1016.71	1358.49	2375.2	0.578719
TCGA.BP.4174.01A.02R.1289.07	589.079	1765.16	2354.24	0.581225
TCGA.B0.5099.01A.01R.1420.07	35.8605	58.5466	94.4072	0.814549
TCGA.BP.4985.01A.01R.1334.07	898.31	1469.8	2368.11	0.579568
TCGA.B8.A54J.01A.11R.A33J.07	767.185	1657.22	2424.41	0.572814
TCGA.GK.A6C7.01A.11R.A33J.07	722.743	1318.37	2041.12	0.618001
TCGA.B0.5696.01A.11R.1541.07	636	1049.39	1685.39	0.658192
TCGA.B0.4694.01A.01R.1277.07	1385.87	2590.13	3976	0.372942
TCGA.B0.4696.01A.01R.1277.07	222.776	161.274	384.05	0.789157
TCGA.BP.4162.01A.02R.1325.07	773.957	2249.97	3023.93	0.498555
TCGA.A3.3349.01A.01R.1188.07	1448.47	1507.22	2955.69	0.507213
TCGA.A3.3373.01A.02R.1420.07	980.891	1272.97	2253.86	0.593152
TCGA.A3.3326.01A.01R.0864.07	658.884	2364.23	3023.11	0.498659
TCGA.CJ.4907.01A.01R.1426.07	1295.82	1304.71	2600.53	0.551434
TCGA.B0.5115.01A.01R.1420.07	982.04	1520.54	2502.58	0.56337
TCGA.B2.3924.01A.02R.A277.07	821.112	2450.78	3271.9	0.466679
TCGA.B0.5700.01A.11R.1541.07	509.37	1305.56	1814.93	0.643757
TCGA.CZ.5453.01A.01R.1503.07	363.826	473.832	837.658	0.746543
TCGA.BP.4169.01A.02R.1289.07	1669.05	2337.22	4006.27	0.368817
TCGA.CW.5589.01A.01R.1541.07	1029.55	1581.36	2610.9	0.550162
TCGA.B0.5113.01A.01R.1420.07	976.911	1715.93	2692.84	0.540079
TCGA.CJ.4884.01A.01R.1305.07	812.87	2175.93	2988.8	0.503018
TCGA.A3.3363.01A.01R.0864.07	-59.4456	1075.21	1015.76	0.728895
TCGA.CZ.5455.01A.01R.1503.07	994.695	2300.47	3295.17	0.463656
TCGA.BP.5194.01A.02R.1426.07	1023.34	1473.65	2496.98	0.564049
TCGA.B0.4701.01A.01R.1277.07	632.119	1931.54	2563.66	0.55594
TCGA.CW.5580.01A.01R.1672.07	990.058	1361.23	2351.29	0.581578
TCGA.B4.5838.01A.11R.1672.07	933.171	831.426	1764.6	0.649394
TCGA.A3.3380.01A.01R.0864.07	904.253	1394	2298.26	0.587893
TCGA.BP.4768.01A.01R.1289.07	161.181	760.856	922.038	0.738245
TCGA.BP.4789.01A.01R.1305.07	1066.86	881.747	1948.61	0.628619
TCGA.AK.3428.01A.02R.1277.07	649.566	1469.72	2119.28	0.608939
TCGA.A3.3331.01A.02R.1325.07	950.306	1709.87	2660.18	0.544108
TCGA.B8.5545.01A.01R.1672.07	1583.55	1776.62	3360.17	0.455181
TCGA.BP.5192.01A.01R.1426.07	265.192	479.327	744.519	0.755569
TCGA.B0.4688.01A.01R.1277.07	307.122	1171.63	1478.75	0.680721
TCGA.A3.3365.01A.01R.0864.07	1186.3	1519.08	2705.38	0.53853
TCGA.CJ.4638.01A.02R.1325.07	-102.075	731.787	629.712	0.766501
TCGA.B0.4706.01A.01R.1503.07	375.127	1226.45	1601.58	0.667403
TCGA.B0.4697.01A.01R.1277.07	1156.84	3075.13	4231.97	0.337825
TCGA.BP.4761.01A.01R.1289.07	-66.9659	1481.19	1414.23	0.687628
TCGA.CJ.5686.01A.11R.1672.07	946.336	2002.51	2948.84	0.508079
TCGA.A3.3311.01A.02R.1325.07	1043.33	1774.36	2817.69	0.524566
TCGA.B2.3923.01A.02R.A277.07	-484.273	4.92272	-479.351	0.86046
TCGA.EU.5907.01A.11R.1672.07	418.222	598.837	1017.06	0.728765
TCGA.A3.3313.01A.02R.1325.07	25.199	248.044	273.243	0.799042
TCGA.CZ.5461.01A.01R.1503.07	1200.94	1746.51	2947.45	0.508256
TCGA.BP.4969.01A.01R.1334.07	238.173	391.503	629.676	0.766504
TCGA.BP.5182.01A.01R.1426.07	1805.31	2393.81	4199.12	0.34236
TCGA.A3.3357.01A.02R.1420.07	389.17	1858.91	2248.08	0.593835
TCGA.A3.3347.01A.02R.1325.07	1735.28	2389.16	4124.44	0.352638
TCGA.B4.5378.01A.01R.1503.07	488.06	625.685	1113.74	0.718974
TCGA.AK.3431.01A.02R.1277.07	1503.53	1555.83	3059.36	0.49404
TCGA.EU.5905.01A.11R.1672.07	1060.52	1272.05	2332.56	0.583812
TCGA.B0.5121.01A.02R.1420.07	872.641	1851.18	2723.82	0.536247
TCGA.B8.A54E.01A.11R.A266.07	-471.586	538.314	66.7279	0.816899
TCGA.A3.3320.01A.02R.1325.07	662.237	1245.83	1908.06	0.633236
TCGA.CJ.5682.01A.11R.1541.07	1238.54	1353.22	2591.76	0.552507
TCGA.BP.4170.01A.02R.1289.07	1193.74	1981.95	3175.69	0.479122
TCGA.B0.5083.01A.02R.1420.07	1383.88	1792.07	3175.95	0.479089
TCGA.CZ.4863.01A.01R.1503.07	912.005	2336.64	3248.64	0.469696
TCGA.BP.4983.01A.01R.1334.07	753.724	2702.97	3456.69	0.44252
TCGA.B0.4691.01A.01R.1277.07	829.436	2011.07	2840.51	0.521711
TCGA.CJ.5671.01A.11R.1541.07	1855.75	2525.74	4381.49	0.317087
TCGA.B8.4154.01A.01R.1188.07	762.25	1902.56	2664.81	0.543537
TCGA.A3.3387.01A.01R.1541.07	1355.91	1912.58	3268.49	0.467122
TCGA.B0.5711.01A.11R.1672.07	940.955	1616.15	2557.1	0.55674
TCGA.B8.5549.01A.01R.1541.07	775.226	1626.45	2401.68	0.575545
TCGA.CW.5590.01A.01R.1541.07	1095.96	1607.18	2703.14	0.538806
TCGA.CZ.5451.01A.01R.1503.07	489.849	1473.04	1962.89	0.626987
TCGA.B0.4849.01A.01R.1277.07	683.123	1618.93	2302.05	0.587442
TCGA.CJ.5675.01A.11R.1541.07	494.638	2553.15	3047.78	0.495517
TCGA.BP.4776.01A.01R.1289.07	712.908	1511.63	2224.53	0.596612
TCGA.BP.5202.01A.02R.1426.07	720.766	1207.19	1927.95	0.630974
TCGA.B0.4817.01A.01R.1277.07	-101.39	1976.59	1875.2	0.636962
TCGA.B4.5377.01A.01R.1503.07	674.224	1548.54	2222.77	0.596821
TCGA.CJ.5677.01A.11R.1541.07	1510.58	1837.67	3348.25	0.456738
TCGA.6D.AA2E.01A.11R.A37O.07	182.143	792.537	974.68	0.733011
TCGA.B8.5163.01A.01R.1420.07	1916.1	2558.43	4474.53	0.304107
TCGA.BP.4974.01A.01R.1334.07	973.136	1100.61	2073.74	0.614229
TCGA.AK.3458.01A.01R.1503.07	196.265	1460.29	1656.55	0.661372
TCGA.B0.4846.01A.01R.1277.07	989.801	1899.34	2889.14	0.515608
TCGA.B8.5159.01A.01R.1420.07	648.803	1377.78	2026.58	0.619677
TCGA.B0.5697.01A.11R.1541.07	689.229	2268.91	2958.14	0.506904
TCGA.B0.4834.01A.01R.1305.07	-449.988	-355.25	-805.239	0.88384
TCGA.BP.4763.01A.01R.1289.07	1072.76	1173.67	2246.44	0.594029
TCGA.B8.5158.01A.01R.1420.07	755.085	1955.05	2710.13	0.537941
TCGA.BP.4987.01A.01R.1334.07	849.065	1468.47	2317.53	0.585602
TCGA.MW.A4EC.01A.11R.A266.07	465.188	1175.71	1640.9	0.663094
TCGA.B0.4833.01A.01R.1305.07	698.497	1937.03	2635.52	0.547141
TCGA.A3.3323.01A.02R.1325.07	1163.8	2017.03	3180.83	0.47846
TCGA.BP.4163.01A.02R.1325.07	944.234	1728.21	2672.45	0.542596
TCGA.CJ.5672.01A.11R.1541.07	930.956	2531.7	3462.65	0.441735
TCGA.BP.4332.01A.01R.1289.07	807.514	1146.44	1953.95	0.628009
TCGA.CJ.6031.01A.11R.1672.07	1681.38	2360.47	4041.85	0.363957
TCGA.CZ.5457.01A.01R.1503.07	850.904	1536.95	2387.85	0.577203
TCGA.CW.5591.01A.01R.1541.07	671.035	259.144	930.179	0.737438
TCGA.BP.4992.01A.01R.1334.07	165.809	2610.85	2776.66	0.529684
TCGA.BP.4330.01A.01R.1289.07	1081.87	2527	3608.87	0.422379
TCGA.BP.4349.01A.01R.1289.07	719.858	1192.07	1911.93	0.632797
TCGA.BP.4801.01A.02R.1420.07	1616.06	1972.78	3588.84	0.425043
TCGA.CJ.4912.01A.01R.1426.07	268.368	1180.42	1448.79	0.683936
TCGA.B4.5844.01A.11R.1672.07	801.71	1058.41	1860.12	0.638667
TCGA.BP.4161.01A.02R.1325.07	755.595	2454.74	3210.33	0.474653
TCGA.BP.4769.01A.01R.1289.07	858.774	172.168	1030.94	0.727368
TCGA.BP.4797.01A.01R.1305.07	1158.66	1942.59	3101.25	0.488684
TCGA.CJ.4876.01A.01R.1305.07	-83.2815	1064.44	981.155	0.732364
TCGA.T7.A92I.01A.11R.A37O.07	-471.676	643.315	171.639	0.80792
TCGA.B0.5117.01A.01R.1420.07	-285.079	-180.723	-465.802	0.859445
TCGA.BP.4167.01A.02R.1325.07	1860.72	2789.26	4649.98	0.279474
TCGA.AS.3777.01A.01R.0864.07	-241.191	423.103	181.911	0.807031
TCGA.B0.5084.01A.01R.1334.07	-235.588	860.127	624.539	0.766988
TCGA.B0.4838.01A.01R.1305.07	646.319	2273.27	2919.58	0.511774
TCGA.CZ.5452.01A.01R.1503.07	507.685	2706.4	3214.09	0.474168
TCGA.A3.A8OU.01A.11R.A37O.07	769.143	1556.96	2326.1	0.584581
TCGA.B0.5110.01A.01R.1420.07	1144.48	1342.62	2487.1	0.565246
TCGA.BP.5200.01A.01R.1426.07	1342.2	1861.56	3203.76	0.475501
TCGA.BP.5187.01A.01R.1426.07	978.446	1255.36	2233.81	0.59552
TCGA.B0.5119.01A.02R.1420.07	778.071	1274.02	2052.09	0.616734
TCGA.CZ.5988.01A.11R.1672.07	1016.77	1322.59	2339.36	0.583002
TCGA.CJ.4889.01A.01R.1305.07	1797.61	2369.74	4167.35	0.346738
TCGA.BP.4176.01A.02R.1289.07	1300.23	2316.35	3616.58	0.421354
TCGA.B0.5710.01A.11R.1672.07	927.779	1447.61	2375.39	0.578697
TCGA.BP.4775.01A.01R.1289.07	526.961	1448.71	1975.67	0.625524
TCGA.BP.4342.01A.01R.1289.07	979.371	1421.28	2400.65	0.575669
TCGA.B0.5695.01A.11R.1541.07	615.523	937.28	1552.8	0.672718
TCGA.CJ.4891.01A.01R.1305.07	913.899	2126.54	3040.44	0.496452
TCGA.BP.4344.01A.01R.1289.07	1359.72	1535.85	2895.57	0.514799
TCGA.A3.3359.01A.01R.0864.07	806.383	1988.03	2794.41	0.527472
TCGA.BP.4986.01A.01R.1334.07	1417.35	1725.42	3142.78	0.483357
TCGA.BP.4782.01A.02R.1420.07	946.338	1894.92	2841.26	0.521617
TCGA.DV.5567.01A.01R.1541.07	68.0663	95.5271	163.593	0.808616
TCGA.B0.5812.01A.11R.1672.07	1283.02	1596.04	2879.06	0.516875
TCGA.BP.4976.01A.01R.1334.07	630.369	888.893	1519.26	0.676352
TCGA.B8.4621.01A.01R.1503.07	-87.1594	1394	1306.84	0.698987
TCGA.CJ.4904.01A.02R.1426.07	964.773	1554.16	2518.93	0.561385
TCGA.AK.3447.01A.01R.1766.07	-805.761	329.758	-476.003	0.86021
TCGA.BP.5168.01A.01R.1420.07	556.497	1125.21	1681.7	0.658598
TCGA.DV.5566.01A.01R.1541.07	508.478	1019.59	1528.07	0.675399
TCGA.DV.5576.01A.01R.1541.07	57.2481	-163.337	-106.089	0.831266
TCGA.B0.5698.01A.11R.1672.07	607.778	2132.33	2740.11	0.534227
TCGA.A3.3382.01A.02R.1325.07	694.279	1572.35	2266.62	0.591643
TCGA.CW.5584.01A.01R.1541.07	988.464	1387.87	2376.34	0.578583
TCGA.B0.4690.01A.01R.1277.07	1344.68	2512.79	3857.47	0.389029
TCGA.CJ.5683.01A.11R.1541.07	604.029	1084.56	1688.58	0.657838
TCGA.B4.5834.01A.11R.1672.07	991.117	1184.32	2175.44	0.60238
TCGA.CJ.4905.01A.02R.1426.07	1364.82	1274.38	2639.2	0.546689
TCGA.A3.3376.01A.02R.1420.07	1488.96	1805.3	3294.26	0.463774
TCGA.A3.A8OW.01A.11R.A37O.07	605.14	1298.66	1903.8	0.633721
TCGA.CJ.4893.01A.01R.1305.07	1013.44	2035.25	3048.69	0.495401
TCGA.B0.4714.01A.01R.1277.07	815.992	2606.96	3422.95	0.446956
TCGA.A3.A8OV.01A.11R.A37O.07	280.026	1335.73	1615.76	0.665852
TCGA.BP.4972.01A.01R.1334.07	1705.41	1909.06	3614.47	0.421634
TCGA.BP.4758.01A.01R.1289.07	792.779	2282.56	3075.34	0.491999
TCGA.DV.5568.01A.01R.1541.07	1075.2	1773.53	2848.73	0.520681
TCGA.BP.5191.01A.01R.1426.07	508.002	2835.94	3343.94	0.457301
TCGA.B8.4148.01A.02R.1325.07	682.185	2425.57	3107.76	0.487851
TCGA.A3.3343.01A.01R.0864.07	497.767	2096.72	2594.49	0.552173
TCGA.A3.3329.01A.01R.0864.07	711.157	1758.79	2469.95	0.567321
TCGA.B2.5639.01A.01R.1541.07	568.351	1782.75	2351.1	0.581601
TCGA.B8.A54K.01A.11R.A33J.07	-256.172	-78.3975	-334.57	0.849438
TCGA.A3.3328.01A.01R.0864.07	-1233.26	-328.412	-1561.68	0.930232
TCGA.DV.5573.01A.01R.1541.07	853.502	2348.72	3202.23	0.4757
TCGA.CJ.4900.01A.01R.1334.07	973.192	2608.48	3581.67	0.425995
TCGA.BP.5199.01A.01R.1426.07	1413.7	2533.32	3947.02	0.376887
TCGA.BP.4988.01A.01R.1334.07	1102.41	2825.16	3927.57	0.379529
TCGA.B2.5635.01B.04R.A277.07	932.97	2033.68	2966.65	0.505826
TCGA.BP.4989.01A.01R.1334.07	1217.47	3039.99	4257.46	0.334301
TCGA.B4.5836.01A.11R.1672.07	1108.93	1624.04	2732.96	0.535114
TCGA.B8.A8YJ.01A.13R.A39I.07	1812.89	2238.37	4051.26	0.36267
TCGA.CJ.4888.01A.01R.1305.07	1309.07	3030.35	4339.41	0.322939
TCGA.BP.4177.01A.02R.1420.07	484.417	319.041	803.458	0.749873
TCGA.A3.3335.01A.01R.0864.07	175.754	1107.75	1283.51	0.701432
TCGA.CZ.5469.01A.01R.1503.07	224.54	996.365	1220.91	0.707952
TCGA.AK.3456.01A.02R.1325.07	-134.661	993.98	859.319	0.744424
TCGA.CZ.5989.01A.11R.1672.07	1100.16	1682.73	2782.89	0.528908
TCGA.B0.5691.01A.11R.1541.07	1343.75	1417.08	2760.84	0.531653
TCGA.B2.5635.01A.01R.A277.07	788.427	1930.44	2718.87	0.53686
TCGA.AK.3450.01A.02R.1277.07	386.323	1016.3	1402.62	0.688864
TCGA.BP.4164.01A.02R.1325.07	150.911	862.445	1013.36	0.729137
TCGA.CZ.4864.01A.01R.1503.07	819.667	2469.52	3289.19	0.464433
TCGA.AK.3427.01A.01R.0864.07	-906.523	-14.0525	-920.575	0.891633
TCGA.B0.5694.01A.11R.1541.07	897.233	1485.07	2382.3	0.577869
TCGA.AK.3455.01A.01R.0864.07	202.418	2032.41	2234.83	0.595399
TCGA.CZ.5984.01A.11R.1672.07	583.064	1759.84	2342.9	0.582579
TCGA.BP.4973.01A.01R.1334.07	634.624	1760.71	2395.33	0.576307
TCGA.DV.A4VZ.01A.11R.A266.07	-275.184	55.353	-219.831	0.840431
TCGA.B0.5109.01A.02R.1420.07	479.986	2096.96	2576.95	0.554318
TCGA.BP.4353.01A.02R.1289.07	1343.71	2162.93	3506.64	0.435934
TCGA.B0.5088.01A.01R.1334.07	1216.5	2088.28	3304.78	0.462405
TCGA.BP.4334.01A.01R.1289.07	-686.236	248.454	-437.782	0.857335
TCGA.DV.5565.01A.01R.1541.07	939.186	1319.74	2258.93	0.592553
TCGA.BP.4965.01A.01R.1334.07	963.681	1246.98	2210.66	0.598245
TCGA.A3.3325.01A.01R.0864.07	1054.35	1562.91	2617.26	0.549384
TCGA.BP.4999.01A.01R.1334.07	1073.6	1079.52	2153.12	0.604992
TCGA.BP.5201.01A.01R.1426.07	366.462	2021.16	2387.62	0.577232
TCGA.BP.4158.01A.02R.1289.07	654.012	1160.27	1814.29	0.64383
TCGA.AK.3451.01A.02R.1188.07	650.21	1776.76	2426.97	0.572505
TCGA.BP.5189.01A.02R.1426.07	1256.21	1844.82	3101.02	0.488714
TCGA.CJ.5689.01A.11R.1541.07	1514.07	2068.73	3582.8	0.425845
TCGA.CJ.4636.01A.02R.1325.07	1392.97	2378.96	3771.92	0.400566
TCGA.CZ.4865.01A.02R.1503.07	1230.83	1900.28	3131.11	0.484856
TCGA.BP.4327.01A.01R.1289.07	567.78	1176.64	1744.42	0.651643
TCGA.BP.4762.01A.02R.1289.07	1684.61	1903.41	3588.02	0.425152
TCGA.AK.3436.01A.02R.1325.07	390.651	1036.05	1426.7	0.686298
TCGA.B0.4707.01A.01R.1277.07	177.595	877.125	1054.72	0.724968
TCGA.CJ.4871.01A.01R.1305.07	1118.66	1379.75	2498.41	0.563876
TCGA.CJ.4643.01A.02R.1325.07	1270.71	1779.22	3049.93	0.495244
TCGA.BP.5195.01A.02R.1426.07	1373.38	1592.34	2965.72	0.505944
TCGA.BP.4347.01A.01R.1289.07	706.148	1202.56	1908.7	0.633164
TCGA.B8.5165.01A.01R.1420.07	1253.86	1209.39	2463.24	0.568132
TCGA.B0.4700.01A.02R.1541.07	1606.78	2707.24	4314.01	0.326466
TCGA.BP.4354.01A.02R.1289.07	1638.19	2811.98	4450.17	0.307511
TCGA.CZ.4861.01A.01R.1305.07	722.693	2500.78	3223.47	0.472955
TCGA.CZ.5985.01A.11R.1672.07	609.297	2134.38	2743.68	0.533784
TCGA.BP.4991.01A.01R.1334.07	939.314	1425.1	2364.41	0.58001
TCGA.CJ.4908.01A.01R.1426.07	1287.51	1503.32	2790.83	0.527919
TCGA.BP.5184.01A.01R.1426.07	1164.04	1595.05	2759.1	0.531869
TCGA.AK.3440.01A.02R.1277.07	-985.953	-68.9629	-1054.92	0.900387
TCGA.CZ.4858.01A.01R.1305.07	600.025	2162.1	2762.13	0.531492
TCGA.B2.4102.01A.02R.1325.07	847.241	2062.19	2909.43	0.513053
TCGA.B0.5690.01A.11R.1541.07	986.946	1647.09	2634.03	0.547324
TCGA.CZ.5465.01A.01R.1503.07	462.637	868.06	1330.7	0.696478
TCGA.BP.4337.01A.01R.1289.07	1172.53	1248.48	2421.01	0.573222
TCGA.CJ.4886.01A.01R.1305.07	1212.62	1852.53	3065.15	0.493301
TCGA.B0.5712.01A.11R.1672.07	72.9852	765.597	838.582	0.746453
TCGA.B2.5633.01A.01R.1541.07	1118.15	1810.96	2929.11	0.510572
TCGA.B2.5633.01A.01R.A277.07	1023.34	1771.26	2794.61	0.527448
TCGA.B2.5633.01B.04R.A277.07	1334.64	1813.71	3148.36	0.48264
TCGA.BP.5169.01A.01R.1426.07	889.607	2422.81	3312.41	0.461411
TCGA.CZ.5454.01A.01R.1503.07	893.538	2239.09	3132.63	0.484661
TCGA.CZ.5463.01A.01R.1503.07	438.816	1321.86	1760.68	0.649831
TCGA.BP.5185.01A.01R.1426.07	432.094	1169.15	1601.25	0.667439
TCGA.DV.A4W0.01A.11R.A266.07	423.548	835.846	1259.39	0.703951
TCGA.A3.3308.01A.02R.1325.07	1328.34	1351.6	2679.94	0.541672
TCGA.CZ.5456.01A.01R.1503.07	884.075	1937.36	2821.43	0.524098
TCGA.BP.5196.01A.01R.1426.07	1117.47	1777.34	2894.82	0.514894
TCGA.BP.5007.01A.01R.1334.07	583.175	1509.68	2092.85	0.612012
TCGA.BP.5004.01A.01R.1334.07	815.861	1105.23	1921.09	0.631755
TCGA.BP.4351.01A.01R.1289.07	635.193	1216.65	1851.84	0.639602
TCGA.B0.4813.01A.01R.1277.07	445.523	1012.68	1458.21	0.682927
TCGA.B0.5699.01A.11R.1541.07	250.765	1496.32	1747.08	0.651347
TCGA.CJ.4881.01A.01R.1305.07	1185.75	2114.4	3300.16	0.463007
TCGA.BP.5010.01A.02R.1420.07	1408.03	1505.93	2913.96	0.512483
TCGA.B0.4821.01A.01R.1503.07	-88.9829	1208.45	1119.46	0.71839
TCGA.B0.5096.01A.01R.1420.07	1070.6	1875.94	2946.54	0.508371
TCGA.B0.4698.01A.01R.1503.07	-209.184	2353.01	2143.83	0.606078
TCGA.BP.5190.01A.01R.1426.07	279.853	1144.5	1424.36	0.686548
TCGA.B0.5692.01A.11R.1541.07	324.963	2375.41	2700.37	0.539149
TCGA.B0.4818.01A.01R.1503.07	669.573	1879	2548.58	0.557779
TCGA.CZ.5458.01A.01R.1503.07	814.558	1738.12	2552.68	0.557279
TCGA.CW.6093.01A.11R.1672.07	840.409	1109.74	1950.14	0.628444
TCGA.B0.5095.01A.01R.1420.07	1573.29	1601.88	3175.17	0.47919
TCGA.B0.5080.01A.01R.1503.07	1575.83	1926.87	3502.71	0.436453
TCGA.CJ.4872.01A.01R.1305.07	1488.92	2055.47	3544.39	0.430939
TCGA.B0.4816.01A.01R.1503.07	1110.99	2250.98	3361.97	0.454946
TCGA.BP.4766.01A.01R.1289.07	654.142	1214.63	1868.77	0.63769
TCGA.CJ.4897.01A.03R.1426.07	845.252	1070.14	1915.39	0.632404
TCGA.A3.3370.01A.02R.1420.07	1193.72	2105.83	3299.56	0.463085
TCGA.BP.4765.01A.01R.1289.07	890.445	1148.3	2038.74	0.618275
TCGA.BP.4962.01A.01R.1334.07	1537.64	2193.26	3730.89	0.406077
TCGA.B8.5164.01A.01R.1420.07	859.985	2804.78	3664.77	0.414928
TCGA.BP.4343.01A.02R.1289.07	1793.32	2290.78	4084.1	0.358173
TCGA.CJ.4901.01A.01R.1426.07	1147.91	2954.51	4102.42	0.355662
TCGA.B0.4843.01A.01R.1277.07	1107.96	1363.27	2471.23	0.567167
TCGA.B0.5707.01A.11R.1541.07	-112.29	792.954	680.664	0.761676
TCGA.CJ.4885.01A.01R.1305.07	464.385	947.98	1412.36	0.687826
TCGA.B8.5551.01A.01R.1541.07	1079.92	3100.07	4179.99	0.344996
TCGA.BP.5174.01A.01R.1426.07	416.718	1108.92	1525.64	0.675663
TCGA.BP.4352.01A.01R.1289.07	-417.896	302.567	-115.328	0.832019
TCGA.AK.3444.01A.02R.1325.07	544.652	1247.23	1791.89	0.646342
TCGA.B2.4099.01A.02R.1188.07	679.907	2124.69	2804.59	0.526201
TCGA.B2.3923.01A.02R.1325.07	-536.821	96.5876	-440.234	0.85752
TCGA.CJ.4923.01A.01R.1426.07	1198.57	2314.95	3513.53	0.435023
TCGA.CW.5581.01A.02R.1541.07	392.359	1081.73	1474.09	0.681221
TCGA.BP.5186.01A.01R.1426.07	812.173	1096.62	1908.8	0.633153
TCGA.BP.5175.01A.01R.1426.07	604.139	1655.14	2259.28	0.592512
TCGA.B0.5075.01A.01R.1334.07	436.874	2183.72	2620.6	0.548974
TCGA.CJ.4873.01A.01R.1305.07	1021.76	2660.82	3682.58	0.412548
TCGA.B0.5098.01A.01R.1420.07	-1287.36	-635.007	-1922.37	0.948349
TCGA.CW.6090.01A.11R.1672.07	1365.44	2138.75	3504.2	0.436256
TCGA.B0.4810.01A.01R.1503.07	1234.48	2245.34	3479.82	0.439473
TCGA.CJ.4890.01A.01R.1305.07	2042.65	3090.97	5133.62	0.210662
TCGA.BP.4338.01A.01R.1289.07	116.638	1438.33	1554.97	0.672482
TCGA.CW.5588.01A.01R.1541.07	1457.87	1786.69	3244.56	0.470225
TCGA.B0.5107.01A.01R.1420.07	-562.432	1810.89	1248.46	0.70509
TCGA.CJ.4878.01A.01R.1305.07	342.075	813.006	1155.08	0.714743
TCGA.CJ.5680.01A.11R.1541.07	571.941	1035.18	1607.12	0.666797
TCGA.B0.5085.01A.01R.1334.07	243.686	1212.16	1455.84	0.68318
TCGA.CJ.5678.01A.11R.1541.07	603.946	2527.16	3131.11	0.484857
TCGA.BP.4784.01A.01R.1305.07	803.948	742.836	1546.78	0.673371
TCGA.BP.4341.01A.01R.1289.07	291.93	963.903	1255.83	0.704322
TCGA.B0.4713.01A.01R.1277.07	204.43	1442.72	1647.15	0.662406
TCGA.BP.4756.01A.01R.1289.07	-477.147	922.333	445.187	0.783613
TCGA.B0.5705.01A.11R.1541.07	537.236	1496.34	2033.58	0.61887
TCGA.B4.5843.01A.11R.1672.07	904.83	747.907	1652.74	0.661792
TCGA.CW.6088.01A.11R.1672.07	910.49	922.772	1833.26	0.641696
TCGA.BP.4759.01A.01R.1289.07	765.377	1360.63	2126	0.608157
TCGA.CJ.4640.01A.02R.1325.07	1045.63	2314.24	3359.87	0.45522
TCGA.CJ.4641.01A.02R.1325.07	1174.42	2716.51	3890.93	0.384499
TCGA.AK.3460.01A.02R.1277.07	856.943	1490.46	2347.41	0.582042
TCGA.CZ.4860.01A.01R.1305.07	647.432	1391.66	2039.09	0.618234
TCGA.B0.4828.01A.01R.1277.07	-262.726	1224.77	962.044	0.734271
TCGA.B8.4620.01A.02R.1325.07	1321.87	1826.48	3148.35	0.482641
TCGA.B8.5552.01B.11R.1672.07	1586.77	1953.73	3540.5	0.431455
TCGA.BP.4804.01A.02R.1305.07	1482.65	2562.78	4045.43	0.363467
TCGA.A3.3378.01A.02R.1325.07	1011.65	2637.85	3649.49	0.416967
TCGA.B0.4836.01A.01R.1305.07	980.306	1970.18	2950.48	0.507872
TCGA.A3.3306.01A.01R.0864.07	182.787	1334.91	1517.7	0.676522
TCGA.BP.4982.01A.01R.1334.07	1379.38	1692.14	3071.52	0.492488
TCGA.MM.A84U.01A.11R.A37O.07	1017.34	1667.23	2684.57	0.5411
TCGA.G6.A8L8.01A.21R.A37O.07	-131.326	742.911	611.585	0.768207
TCGA.AK.3433.01A.02R.1277.07	-674.133	-36.3882	-710.521	0.877251
TCGA.AK.3443.01A.02R.1325.07	-1286.69	-600.135	-1886.82	0.946681
TCGA.B0.4827.01A.02R.1420.07	1441.75	2017.77	3459.51	0.442148
TCGA.A3.3324.01A.02R.1325.07	780.714	1714.31	2495.03	0.564286
TCGA.B0.5077.01A.01R.1334.07	479.776	1421.73	1901.51	0.633981
TCGA.BP.4968.01A.01R.1334.07	788.288	1992.07	2780.36	0.529223
TCGA.CJ.4918.01A.01R.1426.07	1738.86	1912.02	3650.88	0.416782
TCGA.B0.4848.01A.01R.1277.07	1133.85	1924.3	3058.14	0.494195
TCGA.CJ.4868.01A.01R.1305.07	1663.97	2387.62	4051.59	0.362625
TCGA.B4.5835.01A.11R.1672.07	-60.0121	1212.49	1152.48	0.71501
TCGA.CJ.5676.01A.11R.1541.07	1294.35	2032.63	3326.98	0.459513
TCGA.B0.4837.01A.01R.1305.07	1013.43	1278.17	2291.6	0.588683
TCGA.B8.A54H.01A.11R.A33J.07	608.137	1490	2098.13	0.611399
TCGA.BP.4803.01A.01R.1305.07	1009.35	1319.48	2328.83	0.584257
TCGA.CJ.6033.01A.11R.1672.07	994.01	1455.81	2449.82	0.569752
TCGA.BP.4346.01A.01R.1289.07	940.409	2863.61	3804.02	0.396245
TCGA.CJ.4920.01A.01R.1426.07	1098.67	1407.82	2506.48	0.562897
TCGA.BP.4959.01A.01R.1334.07	926.128	1895.62	2821.75	0.524059
TCGA.CW.5587.01A.01R.1541.07	1220.71	2488.61	3709.32	0.408968
TCGA.CJ.4892.01A.01R.1305.07	808.845	1958.72	2767.57	0.530816
TCGA.B0.4847.01A.01R.1277.07	216.977	2640.29	2857.27	0.51961
TCGA.CJ.4634.01A.02R.1325.07	1124.26	1065.79	2190.05	0.600667
TCGA.B0.4718.01A.01R.1277.07	618.582	1564.7	2183.28	0.601461
TCGA.BP.4781.01A.01R.1305.07	990.869	1340.74	2331.61	0.583925
TCGA.AS.3778.01A.01R.A32Z.07	948.757	1315.54	2264.3	0.591918
TCGA.CJ.4875.01A.01R.1305.07	449.803	1953	2402.8	0.575411
TCGA.B0.4852.01A.01R.1503.07	701.922	1313.39	2015.31	0.620975
TCGA.CZ.4853.01A.01R.1426.07	175.393	1211.75	1387.14	0.690509
TCGA.CZ.5464.01A.01R.1503.07	1235.58	2287.56	3523.14	0.433752
TCGA.BP.4329.01A.02R.1289.07	1235.62	1738	2973.61	0.504944
TCGA.CW.5583.01A.02R.1541.07	825.307	844.675	1669.98	0.659892
TCGA.BP.4326.01A.01R.1289.07	943.05	1257.17	2200.22	0.599473
TCGA.CZ.5468.01A.01R.1503.07	679.66	1526.68	2206.34	0.598753
TCGA.A3.A6NJ.01A.12R.A33J.07	753.834	2301.25	3055.09	0.494585
TCGA.BP.5177.01A.01R.1426.07	1240.99	1110.64	2351.63	0.581537
TCGA.BP.5198.01A.01R.1426.07	1452.49	1930.78	3383.27	0.452159
TCGA.B0.5100.01A.01R.1420.07	951.034	756.639	1707.67	0.655725
TCGA.B8.4153.01B.11R.1672.07	424.854	1191.03	1615.89	0.665838
TCGA.CJ.4644.01A.02R.1325.07	1075.04	1938.15	3013.19	0.499922
TCGA.CZ.5982.01A.11R.1672.07	566.071	817.203	1383.27	0.69092
TCGA.CJ.4899.01A.01R.1334.07	1384.34	1474.94	2859.28	0.519358
TCGA.B2.5641.01A.01R.1541.07	914.312	2423.96	3338.27	0.45804
TCGA.BP.4774.01A.01R.1289.07	684.475	1202.19	1886.67	0.635664
TCGA.B8.A54D.01A.21R.A266.07	519.767	2449.58	2969.34	0.505485
TCGA.B0.5116.01A.02R.1420.07	637.237	548.878	1186.12	0.71155
TCGA.B8.A7U6.01A.12R.A37O.07	925.086	1470.58	2395.67	0.576267
TCGA.BP.4340.01A.01R.1289.07	57.9096	737.291	795.2	0.750675
TCGA.B8.5546.01A.01R.1541.07	-529.801	-81.7705	-611.572	0.870187
TCGA.CZ.4859.01A.02R.1426.07	119.276	696.787	816.063	0.748648
TCGA.A3.3316.01A.01R.0864.07	1626.92	1545.46	3172.38	0.479549
TCGA.CZ.5470.01A.01R.1503.07	743.788	2156.87	2900.65	0.514159
TCGA.B8.A54I.01A.21R.A33J.07	716.749	2326.16	3042.91	0.496139
TCGA.BP.4960.01A.01R.1334.07	1132.38	2039.81	3172.19	0.479573
TCGA.CW.6097.01A.11R.1672.07	1519.08	2515.53	4034.61	0.364946
TCGA.B0.4945.01A.01R.1420.07	680.621	1088.96	1769.58	0.648838
TCGA.MM.A563.01A.11R.A266.07	1475.61	2502.43	3978.04	0.372665
TCGA.CJ.6028.01A.11R.1672.07	1126.92	2481.84	3608.76	0.422394
TCGA.B0.4823.01A.02R.1420.07	1275.99	1788.08	3064.07	0.493439
TCGA.CZ.5460.01A.01R.1503.07	548.286	2004.62	2552.91	0.557252
TCGA.B0.5402.01A.01R.1503.07	1029.44	1351.21	2380.65	0.578067
TCGA.3Z.A93Z.01A.11R.A37O.07	766.197	1323.7	2089.9	0.612355
TCGA.CZ.4866.01A.01R.1503.07	282.28	1296.43	1578.71	0.669899
TCGA.CZ.5462.01A.01R.1503.07	416.183	1872.08	2288.26	0.589079
TCGA.B0.4824.01A.01R.1277.07	905.861	2255.93	3161.79	0.480912
TCGA.BP.4335.01A.01R.1289.07	894.398	1929.03	2823.43	0.523849
TCGA.B0.5102.01A.01R.1420.07	203.497	1188.45	1391.94	0.689999
TCGA.B0.4819.01A.01R.1277.07	1383.87	3217.43	4601.31	0.286327
TCGA.B0.4844.01A.01R.1277.07	319.069	1410.66	1729.73	0.653278
TCGA.CZ.5459.01A.01R.1503.07	581.638	1456.7	2038.34	0.618321
TCGA.MM.A564.01A.11R.A266.07	614.606	1255.48	1870.09	0.637541
TCGA.BP.5000.01A.01R.1334.07	1120.13	1979.9	3100.03	0.488841
TCGA.G6.A8L7.01A.11R.A37O.07	-38.838	1139.23	1100.39	0.720334
TCGA.A3.A8OX.01A.11R.A37O.07	1179.43	1864.03	3043.47	0.496067
TCGA.CW.5585.01A.01R.1541.07	359.124	519.101	878.225	0.742568
TCGA.A3.3374.01A.02R.1325.07	290.545	1924.23	2214.78	0.597761
TCGA.A3.3319.01A.02R.1325.07	166.813	1609.48	1776.29	0.648088
TCGA.BP.4967.01A.01R.1334.07	481.223	1031.95	1513.17	0.677011
TCGA.G6.A8L6.01A.11R.A37O.07	566.586	1919.95	2486.53	0.565315
TCGA.B0.4842.01A.02R.1420.07	752.412	2289.76	3042.17	0.496232
TCGA.BP.4173.01A.02R.1289.07	1520.93	3298.09	4819.03	0.255564
TCGA.BP.5170.01A.01R.1426.07	1340.28	1562.71	2902.99	0.513865
TCGA.B0.4814.01A.01R.1277.07	645.285	965.927	1611.21	0.666349
TCGA.A3.A6NL.01A.11R.A33J.07	1011.11	1918.14	2929.26	0.510554
TCGA.B0.5706.01A.11R.1541.07	857.529	2321.15	3178.68	0.478737
TCGA.BP.4165.01A.02R.1289.07	696.595	1701.96	2398.56	0.57592
TCGA.CZ.5466.01A.01R.1503.07	940.648	2347.8	3288.44	0.46453
TCGA.B0.5081.01A.01R.1334.07	1406.27	2982.39	4388.66	0.31609
TCGA.BP.4787.01A.01R.1305.07	1651.67	2069.66	3721.33	0.40736
TCGA.BP.4998.01A.01R.1334.07	1509.93	2143.1	3653.03	0.416495
TCGA.CJ.4637.01A.02R.1325.07	1223.54	3110.68	4334.22	0.323661
TCGA.CJ.4870.01A.01R.1305.07	671.695	1232.73	1904.43	0.633649
TCGA.A3.3367.01A.02R.1420.07	653.158	1480.85	2134.01	0.607223
TCGA.B8.4619.01A.02R.1325.07	-90.0101	144.77	54.7596	0.817911
TCGA.A3.3346.01A.01R.1766.07	173.517	2050.57	2224.09	0.596665
TCGA.B4.5832.01A.11R.1672.07	1231.77	1370.42	2602.19	0.55123
TCGA.B8.5553.01A.01R.1541.07	967.227	1910.81	2878.03	0.517004
TCGA.BP.5176.01A.01R.1426.07	716.33	1293.93	2010.26	0.621555
TCGA.CZ.5986.01A.11R.1672.07	574.382	1118.51	1692.89	0.657362
TCGA.A3.3317.01A.02R.1325.07	1197.75	1586.06	2783.81	0.528793
TCGA.B0.5701.01A.11R.1541.07	359.18	1629.67	1988.85	0.624014
TCGA.CJ.5684.01A.11R.1541.07	808.778	1671.67	2480.45	0.566051
TCGA.CZ.5987.01A.11R.1672.07	308.698	1829.71	2138.41	0.60671
TCGA.BP.4798.01A.01R.1305.07	1456.34	3071.95	4528.29	0.296579
TCGA.B0.5104.01A.01R.1420.07	434.932	1188.33	1623.26	0.665029
TCGA.CW.6087.01A.11R.1672.07	975.387	3187.5	4162.89	0.347352

## Sheet: Table.S6C
Primer of hub-DEGs
Primer Name	Sequence
ADAM19-F	TATGGCTGAGGGCGTGTGAG
ADAM19-R	GCCTTCCTCACTTCCTCTTGTC
AIM2-F	CCCAGGGATCAGGAGTTGATAA
AIM2-R	ACTTTTGGTGCAGCACGTTG
ALDH18A1-F	GCGGCGGTGGTGAGGAAG
ALDH18A1-R	GGGCAGAAGATGTTGGTTGAAGG
CD79A-F	GGCAACGAGTCATACCAGCA
CD79A-R	CGTTCTGCCATCGTTTCCTG
CDT1-F	GTGCTGCCCTACAAGTACCA
CDT1-R	CTCCTCAAAACGCCTACGCA
CXCR4-F	GAAACCCTCAGCGTCTCAGT
CXCR4-R	AGTAGTGGGCTAAGGGCACA
ELOVL5-F	CATTCTCTTGCCGGGGGATT
ELOVL5-R	TGCTCCCTTTTGGACTCACA
HTATIP2-F	GACTACGCCTCTGCCTTTCAAG
HTATIP2-R	TCAGCACATAATCTCGGTCAACAC
ITGA5-F	CTCCCTGAGCGTTGAAACCA
ITGA5-R	GAAGCTAAGGTTGATGCAGGC
ITPKA-F	TTTCCACCTCGTCGGTCTCC
ITPKA-R	TGCCAGTGGTTTTTCTGACC
MTHFD2-F	TTGGCGAGAATCCTGCAAGT
MTHFD2-R	TGTCTCACTGTTGATTCCCACA
NAT1O-F	CTCGGGGCGCAGTCAC
NAT1O-R	CCCAGGATCTTGTGGGTCTC
NUSAP1-F	TGGACCCTGACTCACAGAATC
NUSAP1-R	CTTCTTGGTGCTCGTCTGGT
P4HB-F	CAGCTCGACAAAGATGGGGT
P4HB-R	AAATCTTCGGGGCTGTCTGC
PRR13-F	GAATCCCAATGCCGGTGG
PRR13-R	CCAAGGGATTCACAGGAGGG
PSME4-F	GGAGCAAAGAAACCTGCCCT
PSME4-R	AACCGTATGGCACGAAGAGG
PTP4A3-F	TCAGCACCTTCATTGAGGACC
PTP4A3-R	ACAACGGTGATGCCATCCTT
RAB31-F	CTTTCAAGGAATCAGCCGCC
RAB31-R	CGTAGGGTCCTTCAGCAGTG
SERPINE2-F	ACGGCGTAAATGGAGTTGGT
SERPINE2-R	GCAGAGGCTGGATCCTCAAA
SLAMF7-F	TTTGGCAGCTCACAGGGTC
SLAMF7-R	GGGGTTGTGTTGAAGGTCCA
TGFBI-F	AAATCCTGGTTAGCGGAGGC
TGFBI-R	CTGAGGTCTGTTGGCTGGAG
TRIB3-F	AGGGAAGAGGAGGGAGACAGAG
TRIB3-R	GAGGCAGGAGAAGGCTTGGAG
UBE2C-F	GATGACCCTCATGGCAGTGG
UBE2C-R	GTTTCTCTGGGACCGGACAG

## Sheet: Table.S6D
Original qPCR data of hub-DEGs
Sample Name	Gene Name	Cq
HK2	MTHFD2	22.2
HK2	MTHFD2	22.1
HK2	MTHFD2	22.08
CAKI2	MTHFD2	22.9
CAKI2	MTHFD2	23.01
CAKI2	MTHFD2	22.97
786O	MTHFD2	22.54
786O	MTHFD2	22.66
786O	MTHFD2	22.65
HK2	NUSAPL	23.07
HK2	NUSAPL	22.95
HK2	NUSAPL	22.9
CAKI2	NUSAPL	23.05
CAKI2	NUSAPL	23.08
CAKI2	NUSAPL	23.06
786O	NUSAPL	22.64
786O	NUSAPL	22.63
786O	NUSAPL	22.69
HK2	PRRI3	28.68
HK2	PRRI3	28.85
HK2	PRRI3	28.57
CAKI2	PRRI3	27.84
CAKI2	PRRI3	27.63
CAKI2	PRRI3	27.76
786O	PRRI3	28.56
786O	PRRI3	27.97
786O	PRRI3	27.78
HK2	NAT10	33.27
HK2	NAT10	32.74
HK2	NAT10	32.76
CAKI2	NAT10	34.38
CAKI2	NAT10	34.15
CAKI2	NAT10	34.18
786O	NAT10	34.81
786O	NAT10	33.25
786O	NAT10	33.11
HK2	P4HB	19.24
HK2	P4HB	19.27
HK2	P4HB	19.11
CAKI2	P4HB	19.13
CAKI2	P4HB	19.15
CAKI2	P4HB	18.98
786O	P4HB	19.19
786O	P4HB	19.34
786O	P4HB	19.2
HK2	PSME4	23.6
HK2	PSME4	23.59
HK2	PSME4	23.71
CAKI2	PSME4	24.06
CAKI2	PSME4	24
CAKI2	PSME4	23.92
786O	PSME4	23.52
786O	PSME4	23.5
786O	PSME4	23.59
HK2	PTP4A3	29.93
HK2	PTP4A3	29.69
HK2	PTP4A3	29.91
CAKI2	PTP4A3	26.56
CAKI2	PTP4A3	26.65
CAKI2	PTP4A3	26.55
786O	PTP4A3	30.32
786O	PTP4A3	30.25
786O	PTP4A3	29.93
HK2	ALDH18	22.17
HK2	ALDH18	22.2
HK2	ALDH18	22.22
CAKI2	ALDH18	23.39
CAKI2	ALDH18	23.35
CAKI2	ALDH18	23.31
786O	ALDH18	23.44
786O	ALDH18	23.4
786O	ALDH18	23.36
HK2	ELOVL5	34.86
HK2	ELOVL5	35.11
HK2	ELOVL5	34.82
CAKI2	ELOVL5	36.97
CAKI2	ELOVL5	36.21
CAKI2	ELOVL5	36.86
786O	ELOVL5	36.84
786O	ELOVL5	36.7
786O	ELOVL5	36.38
HK2	CD79A	27.12
HK2	CD79A	27.09
HK2	CD79A	26.66
CAKI2	CD79A	27.21
CAKI2	CD79A	27.14
CAKI2	CD79A	27.13
786O	CD79A	27.17
786O	CD79A	26.94
786O	CD79A	27.03
HK2	CXCR4	41.85
HK2	CXCR4	41.85
HK2	CXCR4	41.85
CAKI2	CXCR4	34.79
CAKI2	CXCR4	36.01
CAKI2	CXCR4	42.41
786O	CXCR4	35.71
786O	CXCR4	35.62
786O	CXCR4	33.94
HK2	ITGA5	27.4
HK2	ITGA5	27.39
HK2	ITGA5	27.48
CAKI2	ITGA5	29.74
CAKI2	ITGA5	29.98
CAKI2	ITGA5	29.73
786O	ITGA5	28.78
786O	ITGA5	28.72
786O	ITGA5	28.99
HK2	ITPKA	31.37
HK2	ITPKA	31.54
HK2	ITPKA	31.66
CAKI2	ITPKA	32.06
CAKI2	ITPKA	32.53
CAKI2	ITPKA	33.06
786O	ITPKA	30.71
786O	ITPKA	30.98
786O	ITPKA	31.24
HK2	HTATIP2	21.93
HK2	HTATIP2	21.97
HK2	HTATIP2	21.86
CAKI2	HTATIP2	21.9
CAKI2	HTATIP2	22.21
CAKI2	HTATIP2	21.91
786O	HTATIP2	22.9
786O	HTATIP2	22.62
786O	HTATIP2	22.61
HK2	SERPLNE	20.62
HK2	SERPLNE	20.65
HK2	SERPLNE	20.68
CAKI2	SERPLNE	19.71
CAKI2	SERPLNE	19.82
CAKI2	SERPLNE	19.66
786O	SERPLNE	20.89
786O	SERPLNE	21.03
786O	SERPLNE	21.06
HK2	TGFB1	17.13
HK2	TGFB1	17.13
HK2	TGFB1	17.11
CAKI2	TGFB1	21.64
CAKI2	TGFB1	21.72
CAKI2	TGFB1	21.79
786O	TGFB1	17.54
786O	TGFB1	17.51
786O	TGFB1	17.51
HK2	UBE2C	33.11
HK2	UBE2C	31.95
HK2	UBE2C	32.65
CAKI2	UBE2C	36.16
CAKI2	UBE2C	34.61
CAKI2	UBE2C	40.18
786O	UBE2C	34.27
786O	UBE2C	34.09
786O	UBE2C	38.95
HK2	RAB3L	20.79
HK2	RAB3L	20.89
HK2	RAB3L	20.96
CAKI2	RAB3L	22.85
CAKI2	RAB3L	22.94
CAKI2	RAB3L	22.96
786O	RAB3L	27.36
786O	RAB3L	27.43
786O	RAB3L	27.75
HK2	SLAMF7	37.12
HK2	SLAMF7	37.12
HK2	SLAMF7	37.12
CAKI2	SLAMF7	36.65
CAKI2	SLAMF7	35.04
CAKI2	SLAMF7	35.79
786O	SLAMF7	28.66
786O	SLAMF7	28.73
786O	SLAMF7	28.46
HK2	TRIB3	25.1
HK2	TRIB3	25.09
HK2	TRIB3	25.15
CAKI2	TRIB3	26.18
CAKI2	TRIB3	26.32
CAKI2	TRIB3	26.31
786O	TRIB3	23.97
786O	TRIB3	24.05
786O	TRIB3	23.82
HK2	ADAM19	30.32
HK2	ADAM19	30.38
HK2	ADAM19	30.94
CAKI2	ADAM19	30.99
CAKI2	ADAM19	31.8
CAKI2	ADAM19	31.2
786O	ADAM19	30.47
786O	ADAM19	30.55
786O	ADAM19	30.21
HK2	CDT1	26.36
HK2	CDT1	26.4
HK2	CDT1	26.43
CAKI2	CDT1	26.41
CAKI2	CDT1	26.32
CAKI2	CDT1	26.49
786O	CDT1	26.37
786O	CDT1	26.3
786O	CDT1	26.46
HK2	AIM2
HK2	AIM2
HK2	AIM2
CAKI2	AIM2
CAKI2	AIM2
CAKI2	AIM2
786O	AIM2
786O	AIM2	34.24
786O	AIM2	34.72
HK2	ACTIN	13.71
HK2	ACTIN	14.36
HK2	ACTIN	14.16
CAKI2	ACTIN	15.46
CAKI2	ACTIN	15.47
CAKI2	ACTIN	15.59
786O	ACTIN	14.53
786O	ACTIN	14.59
786O	ACTIN	14.56

## Sheet: Table.S7A
Machine learning screens three types of genes
LASSO	RF	SVM-RFE
MARCKS	CDT1	UBE2C
HTATIP2	GAPDH	P4HB
PTP4A3	UBE2C	CDT1
TYMS	P4HB	NUSAP1
SHMT1	ENO2	GAPDH
NAT10	IFNGR2	CXCR4
FOLR1	CXCR4	ENO2
PRR13	TYMS	PTP4A3
GAPDH	NUSAP1	TYMS
IFNGR2	TRIB3	TRIB3
ELOVL5	ARPC5	IFNGR2
CXCR4	ITGA5	RAC2
CDT1	ITPKA	ITGA5
	EIF4EBP1	EIF4EBP1
	SHMT1	HTATIP2
	WAS

[truncated: 4 more sheets: Table.S7B, Table.S7C, Table.S7D, Table.S7E]
